# Supplementary material for: Defining hierarchical protein interaction networks from spectral analysis of bacterial proteomes
Source: eLife. 2022 Aug 17;11:e74104. doi: 10.7554/eLife.74104 (PMC9427106; doi:10.7554/eLife.74104)
Supplement: Figure 3—source data 1. [file elife-74104-fig3-data1.xlsx]

## Sheet: Taxonomic Strings
Figure 3 source data 1: NCBI taxonomic strings for each organism used to generate phylogenetic benchmarks, related to Figure 3A.
Uniprot_Proteome_ID	NCBI_Taxonomy_ID	N_proteins	Organism_name	Kingdom	Phylum	Class	Order	Family	Genus	Species
UP000283387	1261403	4641	Mangrovibacterium diazotrophicum	Bacteria	Bacteroidetes	Bacteroidia	Marinilabiliales	Prolixibacteraceae	Mangrovibacterium	Mangrovibacterium diazotrophicum
UP000181985	1897729	3147	Halomonas aestuarii	Bacteria	Proteobacteria	Gammaproteobacteria	Oceanospirillales	Halomonadaceae	Halomonas	Halomonas aestuarii
UP000220675	1962403	4593	Novosphingobium sp. PC22D	Bacteria	Proteobacteria	Alphaproteobacteria	Sphingomonadales	Sphingomonadaceae	Novosphingobium	Novosphingobium sp. PC22D
UP000013137	1188234	601	Mycoplasma alkalescens 14918	Bacteria	Tenericutes	Mollicutes	Mycoplasmatales	Mycoplasmataceae	Mycoplasma	Mycoplasma alkalescens
UP000067399	1303921	1467	endosymbiont of Bathymodiolus septemdierum str. Myojin knoll	Bacteria	Proteobacteria	Gammaproteobacteria	NaV	NaV	NaV	Bathymodiolus septemdierum thioautotrophic gill symbiont
UP000199767	2020377	3510	Sinomonas sp. R1AF57	Bacteria	Actinobacteria	Actinobacteria	Micrococcales	Micrococcaceae	Sinomonas	Sinomonas sp. R1AF57
UP000008229	469383	5912	Conexibacter woesei (strain DSM 14684 / JCM 11494 / NBRC 100937 / ID131577)	Bacteria	Actinobacteria	Thermoleophilia	Solirubrobacterales	Conexibacteraceae	Conexibacter	Conexibacter woesei
UP000051815	1736462	5246	Brevundimonas sp. Root1423	Bacteria	Proteobacteria	Alphaproteobacteria	Caulobacterales	Caulobacteraceae	Brevundimonas	Brevundimonas sp. Root1423
UP000245380	1765684	2818	Acidibacillus sulfuroxidans	Bacteria	Firmicutes	Bacilli	Bacillales	NaV	Acidibacillus	Acidibacillus sulfuroxidans
UP000253941	2661937	3868	Ferruginivarius sediminum	Bacteria	Proteobacteria	Alphaproteobacteria	Rhodospirillales	Rhodospirillaceae	Ferruginivarius	Ferruginivarius sediminum
UP000286373	2292065	2357	Roseburia sp. AM16-25	Bacteria	Firmicutes	Clostridia	Clostridiales	Lachnospiraceae	Roseburia	Roseburia sp. AM16-25
UP000011180	102232	4062	Gloeocapsa sp. PCC 73106	Bacteria	Cyanobacteria	NaV	Chroococcales	Chroococcaceae	Gloeocapsa	Gloeocapsa sp. PCC 73106
UP000199442	1250295	3255	Flavobacteriaceae bacterium MAR_2010_188	Bacteria	Bacteroidetes	Flavobacteriia	Flavobacteriales	Flavobacteriaceae	NaV	Flavobacteriaceae bacterium MAR_2010_188
UP000017966	1263072	1693	Dialister invisus CAG:218	Bacteria	Firmicutes	Negativicutes	Veillonellales	Veillonellaceae	Dialister	Dialister invisus CAG:218
UP000000657	326424	6677	Frankia alni (strain ACN14a)	Bacteria	Actinobacteria	Actinobacteria	Frankiales	Frankiaceae	Frankia	Frankia alni
UP000004712	575609	1404	Peptoniphilus sp. oral taxon 386 str. F0131	Bacteria	Firmicutes	Tissierellia	Tissierellales	Peptoniphilaceae	Peptoniphilus	Peptoniphilus sp. oral taxon 386
UP000002774	714943	6864	Mucilaginibacter paludis DSM 18603	Bacteria	Bacteroidetes	Sphingobacteriia	Sphingobacteriales	Sphingobacteriaceae	Mucilaginibacter	Mucilaginibacter paludis
UP000217676	39478	7440	Streptomyces laurentii	Bacteria	Actinobacteria	Actinobacteria	Streptomycetales	Streptomycetaceae	Streptomyces	Streptomyces laurentii
UP000285258	1335613	2703	Gordonibacter urolithinfaciens	Bacteria	Actinobacteria	Coriobacteriia	Eggerthellales	Eggerthellaceae	Gordonibacter	Gordonibacter urolithinfaciens
UP000262205	2293174	4089	Ruminococcus sp. AF31-8BH	Bacteria	Firmicutes	Clostridia	Clostridiales	Ruminococcaceae	Ruminococcus	Ruminococcus sp. AF31-8BH
UP000189369	643674	2082	Paenalcaligenes hominis	Bacteria	Proteobacteria	Betaproteobacteria	Burkholderiales	Alcaligenaceae	Paenalcaligenes	Paenalcaligenes hominis
UP000270743	2491866	4050	Paracoccus sp. M1-83	Bacteria	Proteobacteria	Alphaproteobacteria	Rhodobacterales	Rhodobacteraceae	Paracoccus	Paracoccus sp. M1-83
UP000198244	2014542	3757	Alcanivorax sp. N3-2A	Bacteria	Proteobacteria	Gammaproteobacteria	Oceanospirillales	Alcanivoracaceae	Alcanivorax	Alcanivorax sp. N3-2A
UP000253154	2267230	3591	Loktanella sp. D2R18	Bacteria	Proteobacteria	Alphaproteobacteria	Rhodobacterales	Rhodobacteraceae	Loktanella	Loktanella sp. D2R18
UP000007587	1144275	8019	Corallococcus coralloides (strain ATCC 25202 / DSM 2259 / NBRC 100086 / M2) (Myxococcus coralloides)	Bacteria	Proteobacteria	Deltaproteobacteria	Myxococcales	Myxococcaceae	Corallococcus	Corallococcus coralloides
UP000183831	1891970	2773	Microbacterium sp. AR7-10	Bacteria	Actinobacteria	Actinobacteria	Micrococcales	Microbacteriaceae	Microbacterium	Microbacterium sp. AR7-10
UP000291101	1168729	4256	Nocardioides sp. HLT2-9	Bacteria	Actinobacteria	Actinobacteria	Propionibacteriales	Nocardioidaceae	Nocardioides	Nocardioides sp. HLT2-9
UP000263171	2293831	2857	Lachnospiraceae bacterium OF09-6	Bacteria	Firmicutes	Clostridia	Clostridiales	Lachnospiraceae	NaV	Lachnospiraceae bacterium OF09-6
UP000017929	1262792	2441	Clostridium sp. CAG:299	Bacteria	Firmicutes	Clostridia	Clostridiales	Clostridiaceae	Clostridium	Clostridium sp. CAG:299
UP000053244	135947	9641	Actinoplanes awajinensis subsp. mycoplanecinus	Bacteria	Actinobacteria	Actinobacteria	Micromonosporales	Micromonosporaceae	Actinoplanes	Actinoplanes awajinensis
UP000000756	380703	4121	Aeromonas hydrophila subsp. hydrophila (strain ATCC 7966 / DSM 30187 / JCM 1027 / KCTC 2358 / NCIMB 9240)	Bacteria	Proteobacteria	Gammaproteobacteria	Aeromonadales	Aeromonadaceae	Aeromonas	Aeromonas hydrophila
UP000030153	1385513	3684	Pontibacillus chungwhensis BH030062	Bacteria	Firmicutes	Bacilli	Bacillales	Bacillaceae	Pontibacillus	Pontibacillus chungwhensis
UP000216612	1189304	1600	Sodalis-like symbiont of Philaenus spumarius	Bacteria	Proteobacteria	Gammaproteobacteria	Enterobacterales	Pectobacteriaceae	Sodalis	Sodalis-like symbiont of Philaenus spumarius
UP000214740	1945886	2620	Prevotellaceae bacterium KH2P17	Bacteria	Bacteroidetes	Bacteroidia	Bacteroidales	Prevotellaceae	NaV	Prevotellaceae bacterium KH2P17
UP000196445	1981174	4347	Pseudomonas sp. M30-35	Bacteria	Proteobacteria	Gammaproteobacteria	Pseudomonadales	Pseudomonadaceae	Pseudomonas	Pseudomonas sp. M30-35
UP000043699	1499687	3353	Planococcus massiliensis	Bacteria	Firmicutes	Bacilli	Bacillales	Planococcaceae	Planococcus	Planococcus massiliensis
UP000272778	2305225	5170	Paraburkholderia sp. DHOA04	Bacteria	Proteobacteria	Betaproteobacteria	Burkholderiales	Burkholderiaceae	Paraburkholderia	Paraburkholderia sp. DHOA04
UP000003374	314278	3484	Nitrococcus mobilis Nb-231	Bacteria	Proteobacteria	Gammaproteobacteria	Chromatiales	Ectothiorhodospiraceae	Nitrococcus	Nitrococcus mobilis
UP000277046	2497480	5511	Flavobacterium sp. GSN2	Bacteria	Bacteroidetes	Flavobacteriia	Flavobacteriales	Flavobacteriaceae	Flavobacterium	Flavobacterium sp. GSN2
UP000055590	1391653	3704	Vulgatibacter incomptus	Bacteria	Proteobacteria	Deltaproteobacteria	Myxococcales	Vulgatibacteraceae	Vulgatibacter	Vulgatibacter incomptus
UP000271255	2058214	3544	Rummeliibacillus sp. TYF005	Bacteria	Firmicutes	Bacilli	Bacillales	Planococcaceae	Rummeliibacillus	Rummeliibacillus sp. TYF005
UP000295578	705336	9026	Actinomadura darangshiensis	Bacteria	Actinobacteria	Actinobacteria	Streptosporangiales	Thermomonosporaceae	Actinomadura	Actinomadura darangshiensis
UP000219072	1300267	5537	Streptomyces zhaozhouensis	Bacteria	Actinobacteria	Actinobacteria	Streptomycetales	Streptomycetaceae	Streptomyces	Streptomyces zhaozhouensis
UP000199286	321339	4109	Citreimonas salinaria	Bacteria	Proteobacteria	Alphaproteobacteria	Rhodobacterales	Rhodobacteraceae	Citreimonas	Citreimonas salinaria
UP000002026	471855	2750	Slackia heliotrinireducens (strain ATCC 29202 / DSM 20476 / NCTC 11029 / RHS 1) (Peptococcus heliotrinreducens)	Bacteria	Actinobacteria	Coriobacteriia	Eggerthellales	Eggerthellaceae	Slackia	Slackia heliotrinireducens
UP000179639	1906740	5761	Streptomyces sp. CC53	Bacteria	Actinobacteria	Actinobacteria	Streptomycetales	Streptomycetaceae	Streptomyces	Streptomyces sp. CC53
UP000053031	1036674	2298	Idiomarina sp. A28L	Bacteria	Proteobacteria	Gammaproteobacteria	Alteromonadales	Idiomarinaceae	Idiomarina	Idiomarina sp. A28L
UP000018312	1262891	2287	Eubacterium sp. CAG:603	Bacteria	Firmicutes	Clostridia	Clostridiales	Eubacteriaceae	Eubacterium	Eubacterium sp. CAG:603
UP000199298	2017977	2687	Candidatus Frackibacter sp. WG12	Bacteria	Firmicutes	Clostridia	Halanaerobiales	Halobacteroidaceae	Candidatus Frackibacter	Candidatus Frackibacter sp. WG12
UP000198951	150146	3815	Flavobacterium gillisiae	Bacteria	Bacteroidetes	Flavobacteriia	Flavobacteriales	Flavobacteriaceae	Flavobacterium	Flavobacterium gillisiae
UP000095113	1886027	4665	Mucilaginibacter sp. PPCGB 2223	Bacteria	Bacteroidetes	Sphingobacteriia	Sphingobacteriales	Sphingobacteriaceae	Mucilaginibacter	Mucilaginibacter sp. PPCGB 2223
UP000198936	1761880	6029	Paenibacillus sp. yr247	Bacteria	Firmicutes	Bacilli	Bacillales	Paenibacillaceae	Paenibacillus	Paenibacillus sp. yr247
UP000176204	1679444	2530	Akkermansia glycaniphila	Bacteria	Verrucomicrobia	Verrucomicrobiae	Verrucomicrobiales	Akkermansiaceae	Akkermansia	Akkermansia glycaniphila
UP000255230	34062	2336	Moraxella osloensis	Bacteria	Proteobacteria	Gammaproteobacteria	Pseudomonadales	Moraxellaceae	Moraxella	Moraxella osloensis
UP000292423	1435465	3271	Fluviicoccus keumensis	Bacteria	Proteobacteria	Gammaproteobacteria	Pseudomonadales	Moraxellaceae	Fluviicoccus	Fluviicoccus keumensis
UP000008495	1184607	3048	Austwickia chelonae NBRC 105200	Bacteria	Actinobacteria	Actinobacteria	Micrococcales	Dermatophilaceae	Austwickia	Austwickia chelonae
UP000009134	279238	3917	Novosphingobium aromaticivorans (strain ATCC 700278 / DSM 12444 / CIP 105152 / NBRC 16084 / F199)	Bacteria	Proteobacteria	Alphaproteobacteria	Sphingomonadales	Sphingomonadaceae	Novosphingobium	Novosphingobium aromaticivorans
UP000253495	1500506	4304	Halopolyspora algeriensis	Bacteria	Actinobacteria	Actinobacteria	NaV	NaV	Halopolyspora	Halopolyspora algeriensis
UP000287890	2507159	2864	Clostridium sp. JN-9	Bacteria	Firmicutes	Clostridia	Clostridiales	Clostridiaceae	Clostridium	Clostridium sp. JN-9
UP000007966	218491	4459	Pectobacterium atrosepticum (strain SCRI 1043 / ATCC BAA-672) (Erwinia carotovora subsp. atroseptica)	Bacteria	Proteobacteria	Gammaproteobacteria	Enterobacterales	Pectobacteriaceae	Pectobacterium	Pectobacterium atrosepticum
UP000000586	171101	2030	Streptococcus pneumoniae (strain ATCC BAA-255 / R6)	Bacteria	Firmicutes	Bacilli	Lactobacillales	Streptococcaceae	Streptococcus	Streptococcus pneumoniae
UP000094936	1080227	4376	Enterovibrio pacificus	Bacteria	Proteobacteria	Gammaproteobacteria	Vibrionales	Vibrionaceae	Enterovibrio	Enterovibrio pacificus
UP000006258	525373	4471	Sphingobacterium spiritivorum ATCC 33861	Bacteria	Bacteroidetes	Sphingobacteriia	Sphingobacteriales	Sphingobacteriaceae	Sphingobacterium	Sphingobacterium spiritivorum
UP000297339	455343	2319	Micrococcus endophyticus	Bacteria	Actinobacteria	Actinobacteria	Micrococcales	Micrococcaceae	Micrococcus	Micrococcus endophyticus
UP000051456	1736329	3039	Frondihabitans sp. Leaf304	Bacteria	Actinobacteria	Actinobacteria	Micrococcales	Microbacteriaceae	Frondihabitans	Frondihabitans sp. Leaf304
UP000236615	2023130	5273	Rhodopirellula sp. MGV	Bacteria	Planctomycetes	Planctomycetia	Pirellulales	Pirellulaceae	Rhodopirellula	Rhodopirellula sp. MGV
UP000218689	2025039	2097	Lactococcus reticulitermitis	Bacteria	Firmicutes	Bacilli	Lactobacillales	Streptococcaceae	Lactococcus	Lactococcus reticulitermitis
UP000288953	1302376	944	Candidatus Pseudomonas adelgestsugas	Bacteria	Proteobacteria	Gammaproteobacteria	Pseudomonadales	Pseudomonadaceae	Pseudomonas	Candidatus Pseudomonas adelgestsugas
UP000199151	1855285	5186	Albidiferax sp. OV413	Bacteria	Proteobacteria	Betaproteobacteria	Burkholderiales	Comamonadaceae	Rhodoferax	Albidiferax sp. OV413
UP000000851	479433	8909	Catenulispora acidiphila (strain DSM 44928 / NRRL B-24433 / NBRC 102108 / JCM 14897)	Bacteria	Actinobacteria	Actinobacteria	Catenulisporales	Catenulisporaceae	Catenulispora	Catenulispora acidiphila
UP000035763	1193182	4162	Tetrasphaera australiensis Ben110	Bacteria	Actinobacteria	Actinobacteria	Micrococcales	Intrasporangiaceae	Tetrasphaera	Tetrasphaera australiensis
UP000078346	1633202	3068	Bacteroidales bacterium Barb6XT	Bacteria	Bacteroidetes	Bacteroidia	Bacteroidales	NaV	NaV	Bacteroidales bacterium Barb6XT
UP000033109	400092	4103	Pontibacter korlensis	Bacteria	Bacteroidetes	Cytophagia	Cytophagales	Hymenobacteraceae	Pontibacter	Pontibacter korlensis
UP000002703	272943	4285	Rhodobacter sphaeroides (strain ATCC 17023 / 2.4.1 / NCIB 8253 / DSM 158)	Bacteria	Proteobacteria	Alphaproteobacteria	Rhodobacterales	Rhodobacteraceae	Rhodobacter	Rhodobacter sphaeroides
UP000199758	490188	3253	Hydrocarboniphaga daqingensis	Bacteria	Proteobacteria	Gammaproteobacteria	Nevskiales	Sinobacteraceae	Hydrocarboniphaga	Hydrocarboniphaga daqingensis
UP000023788	1144669	2615	Acinetobacter sp. CIP 102637	Bacteria	Proteobacteria	Gammaproteobacteria	Pseudomonadales	Moraxellaceae	Acinetobacter	Acinetobacter sp. CIP 102637
UP000194887	33013	3217	Clavibacter michiganensis subsp. michiganensis	Bacteria	Actinobacteria	Actinobacteria	Micrococcales	Microbacteriaceae	Clavibacter	Clavibacter michiganensis
UP000078516	417368	2368	Enterococcus thailandicus	Bacteria	Firmicutes	Bacilli	Lactobacillales	Enterococcaceae	Enterococcus	Enterococcus thailandicus
UP000297357	400837	3948	Paracoccus sp. DMF	Bacteria	Proteobacteria	Alphaproteobacteria	Rhodobacterales	Rhodobacteraceae	Paracoccus	Paracoccus sp. DMF
UP000239736	196587	2911	Albidovulum inexpectatum	Bacteria	Proteobacteria	Alphaproteobacteria	Rhodobacterales	Rhodobacteraceae	Albidovulum	Albidovulum inexpectatum
UP000003445	944559	5992	Paenibacillus sp. HGF7	Bacteria	Firmicutes	Bacilli	Bacillales	Paenibacillaceae	Paenibacillus	Paenibacillus sp. HGF7
UP000196763	1871323	1225	Chlamydiales bacterium SCGC AG-110-P3	Bacteria	Chlamydiae	Chlamydiia	Chlamydiales	NaV	NaV	Chlamydiales bacterium SCGC AG-110-P3
UP000077071	33888	2806	Rathayibacter tritici	Bacteria	Actinobacteria	Actinobacteria	Micrococcales	Microbacteriaceae	Rathayibacter	Rathayibacter tritici
UP000016901	891974	5007	Plautia stali symbiont	Bacteria	Proteobacteria	Gammaproteobacteria	Enterobacterales	Enterobacteriaceae	NaV	Plautia stali symbiont
UP000033604	1609975	5722	Clostridium sp. FS41	Bacteria	Firmicutes	Clostridia	Clostridiales	Clostridiaceae	Clostridium	Clostridium sp. FS41
UP000245707	2082949	3992	Microvirga sp. 17 mud 1-3	Bacteria	Proteobacteria	Alphaproteobacteria	Rhizobiales	Methylobacteriaceae	Microvirga	Microvirga sp. 17 mud 1-3
UP000004324	1149862	4690	Pelosinus fermentans B4	Bacteria	Firmicutes	Negativicutes	Selenomonadales	Sporomusaceae	Pelosinus	Pelosinus fermentans
UP000201322	281093	2269	Prosthecochloris sp. GSB1	Bacteria	Chlorobi	Chlorobia	Chlorobiales	Chlorobiaceae	Prosthecochloris	Prosthecochloris sp. GSB1
UP000245372	2185284	8062	Streptomyces sp. NWU339	Bacteria	Actinobacteria	Actinobacteria	Streptomycetales	Streptomycetaceae	Streptomyces	Streptomyces sp. NWU339
UP000019030	1441930	4521	Chania multitudinisentens RB-25	Bacteria	Proteobacteria	Gammaproteobacteria	Enterobacterales	Yersiniaceae	Chania	Chania multitudinisentens
UP000195513	1255613	3533	Leucobacter sp. 7(1)	Bacteria	Actinobacteria	Actinobacteria	Micrococcales	Microbacteriaceae	Leucobacter	Leucobacter sp. 7(1)
UP000198846	283786	2859	Bizionia paragorgiae	Bacteria	Bacteroidetes	Flavobacteriia	Flavobacteriales	Flavobacteriaceae	Bizionia	Bizionia paragorgiae
UP000051494	437022	2537	Candidatus Berkiella cookevillensis	Bacteria	Proteobacteria	Gammaproteobacteria	Legionellales	Coxiellaceae	Candidatus Berkiella	Candidatus Berkiella cookevillensis
UP000233435	1909700	3459	Confluentibacter sp. 3B	Bacteria	Bacteroidetes	Flavobacteriia	Flavobacteriales	Flavobacteriaceae	Confluentibacter	Confluentibacter flavum
UP000249542	213248	2856	Mesonia algae	Bacteria	Bacteroidetes	Flavobacteriia	Flavobacteriales	Flavobacteriaceae	Mesonia	Mesonia algae
UP000050417	1134406	3344	Ornatilinea apprima	Bacteria	Chloroflexi	Anaerolineae	Anaerolineales	Anaerolineaceae	Ornatilinea	Ornatilinea apprima
UP000291099	1523415	3972	Sphingomonas sp. AAP5	Bacteria	Proteobacteria	Alphaproteobacteria	Sphingomonadales	Sphingomonadaceae	Sphingomonas	Sphingomonas sp. AAP5
UP000019082	1302241	3752	Cutibacterium acnes JCM 18909	Bacteria	Actinobacteria	Actinobacteria	Propionibacteriales	Propionibacteriaceae	Cutibacterium	Cutibacterium acnes
UP000018306	1262956	1950	Ruminococcus sp. CAG:379	Bacteria	Firmicutes	Clostridia	Clostridiales	Ruminococcaceae	Ruminococcus	Ruminococcus sp. CAG:379
UP000095517	338188	3498	Bacteroides finegoldii	Bacteria	Bacteroidetes	Bacteroidia	Bacteroidales	Bacteroidaceae	Bacteroides	Bacteroides finegoldii
UP000000737	313612	6110	Lyngbya sp. (strain PCC 8106) (Lyngbya aestuarii (strain CCY9616))	Bacteria	Cyanobacteria	NaV	Oscillatoriales	Oscillatoriaceae	Lyngbya	Lyngbya sp. PCC 8106
UP000000332	759914	2301	Brachyspira pilosicoli (strain ATCC BAA-1826 / 95/1000)	Bacteria	Spirochaetes	Spirochaetia	Brachyspirales	Brachyspiraceae	Brachyspira	Brachyspira pilosicoli
UP000014417	883161	2076	Propionimicrobium lymphophilum ACS-093-V-SCH5	Bacteria	Actinobacteria	Actinobacteria	Propionibacteriales	Propionibacteriaceae	Propionimicrobium	Propionimicrobium lymphophilum
UP000216473	2015575	5352	Verrucomicrobiales bacterium VVV1	Bacteria	Verrucomicrobia	Verrucomicrobiae	Verrucomicrobiales	NaV	NaV	Verrucomicrobiales bacterium VVV1
UP000007283	1144343	4844	Phyllobacterium sp. YR531	Bacteria	Proteobacteria	Alphaproteobacteria	Rhizobiales	Phyllobacteriaceae	Phyllobacterium	Phyllobacterium sp. YR531
UP000287866	2502783	4413	Phycicoccus sp. CMS6Z-2	Bacteria	Actinobacteria	Actinobacteria	Micrococcales	Intrasporangiaceae	Phycicoccus	Phycicoccus sp. CMS6Z-2
UP000005940	1114943	6684	Streptomyces tsukubensis (strain DSM 42081 / NBRC 108919 / NRRL 18488 / 9993)	Bacteria	Actinobacteria	Actinobacteria	Streptomycetales	Streptomycetaceae	Streptomyces	Streptomyces tsukubensis
UP000005604	675813	3034	Vibrio metschnikovii CIP 69.14	Bacteria	Proteobacteria	Gammaproteobacteria	Vibrionales	Vibrionaceae	Vibrio	Vibrio metschnikovii
UP000004674	864051	4891	Burkholderiales bacterium JOSHI_001	Bacteria	Proteobacteria	Betaproteobacteria	Burkholderiales	NaV	NaV	Burkholderiales bacterium JOSHI_001
UP000236618	2035427	2139	bacterium HR32	Bacteria	NaV	NaV	NaV	NaV	NaV	bacterium HR32
UP000030116	1515615	1618	Porphyromonas sp. COT-290 OH860	Bacteria	Bacteroidetes	Bacteroidia	Bacteroidales	Porphyromonadaceae	Porphyromonas	Porphyromonas sp. COT-290 OH860
UP000321168	1294296	2382	Luteibaculum oceani	Bacteria	Bacteroidetes	Flavobacteriia	Flavobacteriales	Cryomorphaceae	Luteibaculum	Luteibaculum oceani
UP000051295	1641875	4236	Roseovarius atlanticus	Bacteria	Proteobacteria	Alphaproteobacteria	Rhodobacterales	Rhodobacteraceae	Roseovarius	Roseovarius atlanticus
UP000307775	371142	5549	Sphingobacterium daejeonense	Bacteria	Bacteroidetes	Sphingobacteriia	Sphingobacteriales	Sphingobacteriaceae	Sphingobacterium	Sphingobacterium daejeonense
UP000028481	289377	1430	Thermodesulfobacterium commune DSM 2178	Bacteria	Thermodesulfobacteria	Thermodesulfobacteria	Thermodesulfobacteriales	Thermodesulfobacteriaceae	Thermodesulfobacterium	Thermodesulfobacterium commune
UP000005777	641146	1482	Scardovia inopinata F0304	Bacteria	Actinobacteria	Actinobacteria	Bifidobacteriales	Bifidobacteriaceae	Scardovia	Scardovia inopinata
UP000187137	1903686	2116	Jeotgalibaca sp. PTS2502	Bacteria	Firmicutes	Bacilli	Lactobacillales	Carnobacteriaceae	Jeotgalibaca	Jeotgalibaca sp. PTS2502
UP000010847	871968	3029	Desulfitobacterium metallireducens DSM 15288	Bacteria	Firmicutes	Clostridia	Clostridiales	Peptococcaceae	Desulfitobacterium	Desulfitobacterium metallireducens
UP000198634	657014	3839	Litorimicrobium taeanense	Bacteria	Proteobacteria	Alphaproteobacteria	Rhodobacterales	Rhodobacteraceae	Litorimicrobium	Litorimicrobium taeanense
UP000181899	398199	2937	Proteiniclasticum ruminis	Bacteria	Firmicutes	Clostridia	Clostridiales	Clostridiaceae	Proteiniclasticum	Proteiniclasticum ruminis
UP000077545	1848038	2256	Methylovorus sp. MM2	Bacteria	Proteobacteria	Betaproteobacteria	Nitrosomonadales	Methylophilaceae	Methylovorus	Methylovorus sp. MM2
UP000182652	156980	3355	Arthrobacter woluwensis	Bacteria	Actinobacteria	Actinobacteria	Micrococcales	Micrococcaceae	Arthrobacter	Arthrobacter woluwensis
UP000291562	2511995	3894	Xanthomonadaceae bacterium AQ6-296	Bacteria	Proteobacteria	Gammaproteobacteria	Xanthomonadales	Xanthomonadaceae	Pseudolysobacter	Pseudolysobacter antarcticus
UP000245166	2135789	3302	Miniimonas sp. PCH200	Bacteria	Actinobacteria	Actinobacteria	Micrococcales	Beutenbergiaceae	Miniimonas	Miniimonas sp. PCH200
UP000050966	1736341	3857	Leifsonia sp. Leaf336	Bacteria	Actinobacteria	Actinobacteria	Micrococcales	Microbacteriaceae	Leifsonia	Leifsonia sp. Leaf336
UP000051658	1449336	2398	Carnobacterium divergens DSM 20623	Bacteria	Firmicutes	Bacilli	Lactobacillales	Carnobacteriaceae	Carnobacterium	Carnobacterium divergens
UP000321328	1123024	4883	Pseudonocardia asaccharolytica DSM 44247 = NBRC 16224	Bacteria	Actinobacteria	Actinobacteria	Pseudonocardiales	Pseudonocardiaceae	Pseudonocardia	Pseudonocardia asaccharolytica
UP000282112	2485160	9095	Streptomyces sp. Ag82_G5-5	Bacteria	Actinobacteria	Actinobacteria	Streptomycetales	Streptomycetaceae	Streptomyces	Streptomyces sp. Ag82_G5-5
UP000000504	903503	405	Moranella endobia (strain PCIT)	Bacteria	Proteobacteria	Gammaproteobacteria	Enterobacterales	Enterobacteriaceae	Candidatus Moranella	Candidatus Moranella endobia
UP000002930	1187851	4490	Rhodovulum sp. PH10	Bacteria	Proteobacteria	Alphaproteobacteria	Rhodobacterales	Rhodobacteraceae	Rhodovulum	Rhodovulum sp. PH10
UP000245984	2202516	7067	Streptomyces sp. ZEA17I	Bacteria	Actinobacteria	Actinobacteria	Streptomycetales	Streptomycetaceae	Streptomyces	Streptomyces sp. ZEA17I
UP000077701	161355	7159	Planomonospora sphaerica	Bacteria	Actinobacteria	Actinobacteria	Streptosporangiales	Streptosporangiaceae	Planomonospora	Planomonospora sphaerica
UP000321605	2603899	4923	Methylobacterium sp. WL8	Bacteria	Proteobacteria	Alphaproteobacteria	Rhizobiales	Methylobacteriaceae	Methylobacterium	Methylobacterium sp. WL8
UP000011134	1056511	4904	Photobacterium marinum	Bacteria	Proteobacteria	Gammaproteobacteria	Vibrionales	Vibrionaceae	Photobacterium	Photobacterium marinum
UP000266615	2174932	2262	Nesterenkonia sp. M8	Bacteria	Actinobacteria	Actinobacteria	Micrococcales	Micrococcaceae	Nesterenkonia	Nesterenkonia sp. M8
UP000184032	1120995	1915	Anaerosphaera aminiphila DSM 21120	Bacteria	Firmicutes	Tissierellia	Tissierellales	Peptoniphilaceae	Anaerosphaera	Anaerosphaera aminiphila
UP000019140	1429439	8989	Candidatus Entotheonella gemina	Bacteria	Candidatus Tectomicrobia	NaV	NaV	NaV	Candidatus Entotheonella	Candidatus Entotheonella gemina
UP000291758	2509459	3038	Xylanibacterium sp. 2JSPR-7	Bacteria	Actinobacteria	Actinobacteria	Micrococcales	Promicromonosporaceae	Xylanimonas	Xylanimonas allomyrinae
UP000053681	1414648	3896	Bacillus sp. SGD-V-76	Bacteria	Firmicutes	Bacilli	Bacillales	Bacillaceae	Bacillus	Bacillus sp. SGD-V-76
UP000198238	1853278	2219	Neisseria chenwenguii	Bacteria	Proteobacteria	Betaproteobacteria	Neisseriales	Neisseriaceae	Neisseria	Neisseria chenwenguii
UP000322214	980251	5083	Mariniblastus fucicola	Bacteria	Planctomycetes	Planctomycetia	Pirellulales	Pirellulaceae	Mariniblastus	Mariniblastus fucicola
UP000007435	649349	3429	Leadbetterella byssophila (strain DSM 17132 / KACC 11308 / 4M15)	Bacteria	Bacteroidetes	Cytophagia	Cytophagales	Cytophagaceae	Leadbetterella	Leadbetterella byssophila
UP000184052	1121476	3628	Dethiosulfatibacter aminovorans DSM 17477	Bacteria	Firmicutes	Tissierellia	NaV	NaV	Dethiosulfatibacter	Dethiosulfatibacter aminovorans
UP000186607	249408	4906	Deinococcus marmoris	Bacteria	Deinococcus-Thermus	Deinococci	Deinococcales	Deinococcaceae	Deinococcus	Deinococcus marmoris
UP000241362	1188250	3451	Rhodobacter blasticus DSM 2131	Bacteria	Proteobacteria	Alphaproteobacteria	Rhodobacterales	Rhodobacteraceae	Rhodobacter	Rhodobacter blasticus
UP000284841	1776384	3841	Emergencia timonensis	Bacteria	Firmicutes	Clostridia	Clostridiales	Clostridiales Family XIII. Incertae Sedis	Emergencia	Emergencia timonensis
UP000243589	479117	2020	Brevibacterium ravenspurgense	Bacteria	Actinobacteria	Actinobacteria	Micrococcales	Brevibacteriaceae	Brevibacterium	Brevibacterium ravenspurgense
UP000285019	2292231	2287	Coprococcus sp. AF21-14LB	Bacteria	Firmicutes	Clostridia	Clostridiales	Lachnospiraceae	Coprococcus	Coprococcus sp. AF21-14LB
UP000061908	669041	2382	Tenacibaculum dicentrarchi	Bacteria	Bacteroidetes	Flavobacteriia	Flavobacteriales	Flavobacteriaceae	Tenacibaculum	Tenacibaculum dicentrarchi
UP000051002	1736531	5472	Devosia sp. Root413D1	Bacteria	Proteobacteria	Alphaproteobacteria	Rhizobiales	Hyphomicrobiaceae	Devosia	Devosia sp. Root413D1
UP000008707	768066	3621	Halomonas elongata (strain ATCC 33173 / DSM 2581 / NBRC 15536 / NCIMB 2198 / 1H9)	Bacteria	Proteobacteria	Gammaproteobacteria	Oceanospirillales	Halomonadaceae	Halomonas	Halomonas elongata
UP000273158	1714841	2897	Microbacterium telephonicum	Bacteria	Actinobacteria	Actinobacteria	Micrococcales	Microbacteriaceae	Microbacterium	Microbacterium telephonicum
UP000004169	1150626	3771	Phaeospirillum molischianum DSM 120	Bacteria	Proteobacteria	Alphaproteobacteria	Rhodospirillales	Rhodospirillaceae	Phaeospirillum	Phaeospirillum molischianum
UP000014176	1235790	3773	Eubacterium sp. 14-2	Bacteria	Firmicutes	Clostridia	Clostridiales	Eubacteriaceae	Eubacterium	Eubacterium sp. 14-2
UP000001303	871271	206	Zinderia insecticola (strain CARI)	Bacteria	Proteobacteria	Betaproteobacteria	Burkholderiales	Oxalobacteraceae	Candidatus Zinderia	Candidatus Zinderia insecticola
UP000093256	1819298	7035	Streptomyces sp. PTY087I2	Bacteria	Actinobacteria	Actinobacteria	Streptomycetales	Streptomycetaceae	Streptomyces	Streptomyces sp. PTY087I2
UP000037948	1547578	4649	Geobacillus sp. BCO2	Bacteria	Firmicutes	Bacilli	Bacillales	Bacillaceae	Geobacillus	Geobacillus sp. BCO2
UP000290568	29556	768	Mycoplasma gallinaceum	Bacteria	Tenericutes	Mollicutes	Mycoplasmatales	Mycoplasmataceae	Mycoplasma	Mycoplasma gallinaceum
UP000240904	266810	4228	Photobacterium lipolyticum	Bacteria	Proteobacteria	Gammaproteobacteria	Vibrionales	Vibrionaceae	Photobacterium	Photobacterium lipolyticum
UP000092482	1758689	3300	Serinicoccus sp. JLT9	Bacteria	Actinobacteria	Actinobacteria	Micrococcales	Intrasporangiaceae	Serinicoccus	Serinicoccus sp. JLT9
UP000010411	698759	9368	Streptomyces ipomoeae 91-03	Bacteria	Actinobacteria	Actinobacteria	Streptomycetales	Streptomycetaceae	Streptomyces	Streptomyces ipomoeae
UP000252530	2493120	1589	Bifidobacterium aemilianum	Bacteria	Actinobacteria	Actinobacteria	Bifidobacteriales	Bifidobacteriaceae	Bifidobacterium	Bifidobacterium aemilianum
UP000284430	2292272	3107	Lachnospiraceae bacterium OM04-12BH	Bacteria	Firmicutes	Clostridia	Clostridiales	Lachnospiraceae	NaV	Lachnospiraceae bacterium OM04-12BH
UP000319213	103836	4864	Thermopolyspora flexuosa	Bacteria	Actinobacteria	Actinobacteria	Streptosporangiales	Streptosporangiaceae	Thermopolyspora	Thermopolyspora flexuosa
UP000076947	1705	2428	Corynebacterium stationis	Bacteria	Actinobacteria	Actinobacteria	Corynebacteriales	Corynebacteriaceae	Corynebacterium	Corynebacterium stationis
UP000000555	273068	2545	Caldanaerobacter subterraneus subsp. tengcongensis (strain DSM 15242 / JCM 11007 / NBRC 100824 / MB4) (Thermoanaerobacter tengcongensis)	Bacteria	Firmicutes	Clostridia	Thermoanaerobacterales	Thermoanaerobacteraceae	Caldanaerobacter	Caldanaerobacter subterraneus
UP000265887	2039283	2357	endosymbiont GvMRE of Glomus versiforme	Bacteria	Tenericutes	Mollicutes	Mycoplasmatales	NaV	NaV	endosymbiont GvMRE of Glomus versiforme
UP000002139	448385	9320	Sorangium cellulosum (strain So ce56) (Polyangium cellulosum (strain So ce56))	Bacteria	Proteobacteria	Deltaproteobacteria	Myxococcales	Polyangiaceae	Sorangium	Sorangium cellulosum
UP000253860	2203891	4102	Rhodovulum sp. 12E13	Bacteria	Proteobacteria	Alphaproteobacteria	Rhodobacterales	Rhodobacteraceae	Rhodovulum	Rhodovulum sp. 12E13
UP000036921	1581033	4788	Bacillus sp. FJAT-21945	Bacteria	Firmicutes	Bacilli	Bacillales	Bacillaceae	Bacillus	Bacillus sp. FJAT-21945
UP000232878	2058137	2976	Polaribacter sp. ALD11	Bacteria	Bacteroidetes	Flavobacteriia	Flavobacteriales	Flavobacteriaceae	Polaribacter	Polaribacter sp. ALD11
UP000184114	1123404	3095	Tissierella praeacuta DSM 18095	Bacteria	Firmicutes	Tissierellia	Tissierellales	Tissierellaceae	Tissierella	Tissierella praeacuta
UP000273807	409290	3770	Arthrobacter oryzae	Bacteria	Actinobacteria	Actinobacteria	Micrococcales	Micrococcaceae	Arthrobacter	Arthrobacter oryzae
UP000198792	1250198	3597	Tenacibaculum sp. MAR_2010_89	Bacteria	Bacteroidetes	Flavobacteriia	Flavobacteriales	Flavobacteriaceae	Tenacibaculum	Tenacibaculum sp. MAR_2010_89
UP000248054	262005	3007	Winogradskyella epiphytica	Bacteria	Bacteroidetes	Flavobacteriia	Flavobacteriales	Flavobacteriaceae	Winogradskyella	Winogradskyella epiphytica
UP000000606	279010	4164	Bacillus licheniformis (strain ATCC 14580 / DSM 13 / JCM 2505 / NBRC 12200 / NCIMB 9375 / NRRL NRS-1264 / Gibson 46)	Bacteria	Firmicutes	Bacilli	Bacillales	Bacillaceae	Bacillus	Bacillus licheniformis
UP000037709	1415541	5527	Micromonospora sp. NRRL B-16802	Bacteria	Actinobacteria	Actinobacteria	Micromonosporales	Micromonosporaceae	Micromonospora	Micromonospora sp. NRRL B-16802
UP000031014	1321606	4894	Bacillus selenatarsenatis SF-1	Bacteria	Firmicutes	Bacilli	Bacillales	Bacillaceae	Bacillus	Bacillus selenatarsenatis
UP000285710	2306993	4081	Sinirhodobacter populi	Bacteria	Proteobacteria	Alphaproteobacteria	Rhodobacterales	Rhodobacteraceae	Sinirhodobacter	Sinirhodobacter populi
UP000000818	195102	2721	Clostridium perfringens (strain 13 / Type A)	Bacteria	Firmicutes	Clostridia	Clostridiales	Clostridiaceae	Clostridium	Clostridium perfringens
UP000062859	1727164	4966	Pedobacter sp. PACM 27299	Bacteria	Bacteroidetes	Sphingobacteriia	Sphingobacteriales	Sphingobacteriaceae	Pedobacter	Pedobacter sp. PACM 27299
UP000018205	1262826	1188	Clostridium sp. CAG:594	Bacteria	Firmicutes	Clostridia	Clostridiales	Clostridiaceae	Clostridium	Clostridium sp. CAG:594
UP000000815	632	3904	Yersinia pestis	Bacteria	Proteobacteria	Gammaproteobacteria	Enterobacterales	Yersiniaceae	Yersinia	Yersinia pestis
UP000185783	197461	3634	Nesiotobacter exalbescens	Bacteria	Proteobacteria	Alphaproteobacteria	Rhodobacterales	Rhodobacteraceae	Nesiotobacter	Nesiotobacter exalbescens
UP000006265	1122247	4959	Mycolicibacterium hassiacum (strain DSM 44199 / CIP 105218 / JCM 12690 / 3849) (Mycobacterium hassiacum)	Bacteria	Actinobacteria	Actinobacteria	Corynebacteriales	Mycobacteriaceae	Mycolicibacterium	Mycolicibacterium hassiacum
UP000037971	1523432	3055	alpha proteobacterium AAP81b	Bacteria	Proteobacteria	Alphaproteobacteria	NaV	NaV	NaV	alpha proteobacterium AAP81b
UP000028945	1072685	1452	Basilea psittacipulmonis DSM 24701	Bacteria	Proteobacteria	Betaproteobacteria	Burkholderiales	Alcaligenaceae	Basilea	Basilea psittacipulmonis
UP000001591	414684	3984	Rhodospirillum centenum (strain ATCC 51521 / SW)	Bacteria	Proteobacteria	Alphaproteobacteria	Rhodospirillales	Rhodospirillaceae	Rhodospirillum	Rhodospirillum centenum
UP000199337	1121424	5051	Desulfotomaculum arcticum DSM 17038	Bacteria	Firmicutes	Clostridia	Clostridiales	Peptococcaceae	Desulfallas	Desulfallas arcticus
UP000051657	1736538	6948	Paenibacillus sp. Root444D2	Bacteria	Firmicutes	Bacilli	Bacillales	Paenibacillaceae	Paenibacillus	Paenibacillus sp. Root444D2
UP000188357	1945521	2327	Psychrobacter piechaudii	Bacteria	Proteobacteria	Gammaproteobacteria	Pseudomonadales	Moraxellaceae	Psychrobacter	Psychrobacter piechaudii
UP000091934	1834080	4776	Mycobacteriaceae bacterium 1482268.1	Bacteria	Actinobacteria	Actinobacteria	Corynebacteriales	Mycobacteriaceae	NaV	Mycobacteriaceae bacterium 1482268.1
UP000185557	549789	4999	Phormidium tenue NIES-30	Bacteria	Cyanobacteria	NaV	Oscillatoriales	Oscillatoriaceae	Phormidium	Phormidium tenue
UP000182237	441500	2311	Corynebacterium timonense	Bacteria	Actinobacteria	Actinobacteria	Corynebacteriales	Corynebacteriaceae	Corynebacterium	Corynebacterium timonense
UP000018390	1262751	2085	Bacteroides sp. CAG:770	Bacteria	Bacteroidetes	Bacteroidia	Bacteroidales	Bacteroidaceae	Bacteroides	Bacteroides sp. CAG:770
UP000034076	270498	3148	Catabacter hongkongensis	Bacteria	Firmicutes	Clostridia	Clostridiales	Catabacteriaceae	Catabacter	Catabacter hongkongensis
UP000274391	2488791	2531	Zimmermannella sp. YIM 102482-1	Bacteria	Actinobacteria	Actinobacteria	Micrococcales	Microbacteriaceae	Pseudoclavibacter	Zimmermannella sp. YIM 102482-1
UP000242907	1945637	1097	Prochlorococcus sp. HOT_208_60	Bacteria	Cyanobacteria	NaV	Synechococcales	Prochloraceae	Prochlorococcus	Prochlorococcus sp. HOT_208_60
UP000009222	545695	3457	Treponema azotonutricium (strain ATCC BAA-888 / DSM 13862 / ZAS-9)	Bacteria	Spirochaetes	Spirochaetia	Spirochaetales	Spirochaetaceae	Treponema	Treponema azotonutricium
UP000019276	1328313	3835	Catenovulum agarivorans DS-2	Bacteria	Proteobacteria	Gammaproteobacteria	Alteromonadales	Alteromonadaceae	Catenovulum	Catenovulum agarivorans
UP000001635	880070	4983	Cyclobacterium marinum (strain ATCC 25205 / DSM 745) (Flectobacillus marinus)	Bacteria	Bacteroidetes	Cytophagia	Cytophagales	Cyclobacteriaceae	Cyclobacterium	Cyclobacterium marinum
UP000271045	2203204	6850	Streptomyces sp. WAC 01438	Bacteria	Actinobacteria	Actinobacteria	Streptomycetales	Streptomycetaceae	Streptomyces	Streptomyces sp. WAC 01438
UP000294500	2545719	5085	Lysobacter sp. N42	Bacteria	Proteobacteria	Gammaproteobacteria	Xanthomonadales	Xanthomonadaceae	Lysobacter	Lysobacter sp. N42
UP000018182	1262988	2767	Firmicutes bacterium CAG:95	Bacteria	Firmicutes	NaV	NaV	NaV	NaV	Firmicutes bacterium CAG:95
UP000001549	656024	4063	Frankia symbiont subsp. Datisca glomerata	Bacteria	Actinobacteria	Actinobacteria	Frankiales	Frankiaceae	Frankia	Candidatus Frankia meridionalis
UP000236725	871327	3041	Parabacteroides chinchillae	Bacteria	Bacteroidetes	Bacteroidia	Bacteroidales	Tannerellaceae	Parabacteroides	Parabacteroides chinchillae
UP000033423	29290	6447	Candidatus Magnetobacterium bavaricum	Bacteria	Nitrospirae	Nitrospira	Nitrospirales	Nitrospiraceae	Candidatus Magnetobacterium	Candidatus Magnetobacterium bavaricum
UP000019668	1196094	2295	Snodgrassella alvi wkB2	Bacteria	Proteobacteria	Betaproteobacteria	Neisseriales	Neisseriaceae	Snodgrassella	Snodgrassella alvi
UP000077323	1822225	3900	Sulfitobacter sp. HI0023	Bacteria	Proteobacteria	Alphaproteobacteria	Rhodobacterales	Rhodobacteraceae	Sulfitobacter	Sulfitobacter sp. HI0023
UP000006804	688269	1928	Pseudothermotoga thermarum DSM 5069	Bacteria	Thermotogae	Thermotogae	Thermotogales	Thermotogaceae	Pseudothermotoga	Pseudothermotoga thermarum
UP000201613	1819565	4548	Flavimaricola marinus	Bacteria	Proteobacteria	Alphaproteobacteria	Rhodobacterales	Rhodobacteraceae	Flavimaricola	Flavimaricola marinus
UP000051653	1735682	3263	Agreia sp. Leaf210	Bacteria	Actinobacteria	Actinobacteria	Micrococcales	Microbacteriaceae	Agreia	Agreia sp. Leaf210
UP000001844	472759	3770	Nitrosococcus halophilus (strain Nc4)	Bacteria	Proteobacteria	Gammaproteobacteria	Chromatiales	Chromatiaceae	Nitrosococcus	Nitrosococcus halophilus
UP000244962	2173166	2928	Mycetocola sp. 622	Bacteria	Actinobacteria	Actinobacteria	Micrococcales	Microbacteriaceae	Mycetocola	Mycetocola sp. 622
UP000270219	2448030	3815	Oceanobacillus sp. YLB-02	Bacteria	Firmicutes	Bacilli	Bacillales	Bacillaceae	Oceanobacillus	Oceanobacillus sp. YLB-02
UP000018243	1262966	1633	Ruminococcus sp. CAG:724	Bacteria	Firmicutes	Clostridia	Clostridiales	Ruminococcaceae	Ruminococcus	Ruminococcus sp. CAG:724
UP000302163	2579935	4678	Izhakiella sp. KSNA2	Bacteria	Proteobacteria	Gammaproteobacteria	Enterobacterales	Enterobacteriaceae	Izhakiella	Izhakiella sp. KSNA2
UP000035021	1223543	4191	Gordonia paraffinivorans NBRC 108238	Bacteria	Actinobacteria	Actinobacteria	Corynebacteriales	Gordoniaceae	Gordonia	Gordonia paraffinivorans
UP000245839	475081	4631	Jannaschia seohaensis	Bacteria	Proteobacteria	Alphaproteobacteria	Rhodobacterales	Rhodobacteraceae	Jannaschia	Jannaschia seohaensis
UP000238196	2083153	5549	Proteobacteria bacterium 228	Bacteria	Proteobacteria	NaV	NaV	NaV	NaV	Proteobacteria bacterium 228
UP000001565	357244	966	Orientia tsutsugamushi (strain Boryong) (Rickettsia tsutsugamushi)	Bacteria	Proteobacteria	Alphaproteobacteria	Rickettsiales	Rickettsiaceae	Orientia	Orientia tsutsugamushi
UP000009135	1111676	1175	Mycoplasma haemocanis (strain Illinois)	Bacteria	Tenericutes	Mollicutes	Mycoplasmatales	Mycoplasmataceae	Mycoplasma	Mycoplasma haemocanis
UP000095347	28181	3316	Magnetovibrio blakemorei	Bacteria	Proteobacteria	Alphaproteobacteria	Rhodospirillales	Rhodospirillaceae	Magnetovibrio	Magnetovibrio blakemorei
UP000032871	888057	1956	Aggregatibacter segnis ATCC 33393	Bacteria	Proteobacteria	Gammaproteobacteria	Pasteurellales	Pasteurellaceae	Aggregatibacter	Aggregatibacter segnis
UP000267223	2294116	4167	Ferruginibacter sp. BO-59	Bacteria	Bacteroidetes	Chitinophagia	Chitinophagales	Chitinophagaceae	Ferruginibacter	Ferruginibacter sp. BO-59
UP000199040	442341	4043	Halomonas xianhensis	Bacteria	Proteobacteria	Gammaproteobacteria	Oceanospirillales	Halomonadaceae	Halomonas	Halomonas xianhensis
UP000239007	716813	3139	Psychrosphaera saromensis	Bacteria	Proteobacteria	Gammaproteobacteria	Alteromonadales	Pseudoalteromonadaceae	Psychrosphaera	Psychrosphaera saromensis
UP000291769	2026763	7151	Myxococcales bacterium	Bacteria	Proteobacteria	Deltaproteobacteria	Myxococcales	NaV	NaV	Myxococcales bacterium
UP000036046	1618204	5212	Puniceibacterium sp. IMCC21224	Bacteria	Proteobacteria	Alphaproteobacteria	Rhodobacterales	Rhodobacteraceae	Puniceibacterium	Puniceibacterium sp. IMCC21224
UP000271937	2488993	3009	Flavobacterium macacae	Bacteria	Bacteroidetes	Flavobacteriia	Flavobacteriales	Flavobacteriaceae	Flavobacterium	Flavobacterium macacae
UP000272558	2486470	2650	Muribaculaceae bacterium Isolate-102 (HZI)	Bacteria	Bacteroidetes	Bacteroidia	Bacteroidales	Muribaculaceae	NaV	Muribaculaceae bacterium Isolate-102 (HZI)
UP000275281	2259342	3562	Alteromonas sp. U0105	Bacteria	Proteobacteria	Gammaproteobacteria	Alteromonadales	Alteromonadaceae	Alteromonas	Alteromonas sp. U0105
UP000051386	517011	3376	Stenotrophomonas chelatiphaga	Bacteria	Proteobacteria	Gammaproteobacteria	Xanthomonadales	Xanthomonadaceae	Stenotrophomonas	Stenotrophomonas chelatiphaga
UP000033699	359131	6267	Streptomyces rubellomurinus (strain ATCC 31215)	Bacteria	Actinobacteria	Actinobacteria	Streptomycetales	Streptomycetaceae	Streptomyces	Streptomyces rubellomurinus
UP000050471	154981	3465	Aliiroseovarius crassostreae	Bacteria	Proteobacteria	Alphaproteobacteria	Rhodobacterales	Rhodobacteraceae	Aliiroseovarius	Aliiroseovarius crassostreae
UP000094764	903983	2789	Enterococcus quebecensis	Bacteria	Firmicutes	Bacilli	Lactobacillales	Enterococcaceae	Enterococcus	Enterococcus quebecensis
UP000010146	391606	2477	Caldanaerobacter subterraneus subsp. pacificus DSM 12653	Bacteria	Firmicutes	Clostridia	Thermoanaerobacterales	Thermoanaerobacteraceae	Caldanaerobacter	Caldanaerobacter subterraneus
UP000263900	2315862	6406	Paraflavitalea soli	Bacteria	Bacteroidetes	Chitinophagia	Chitinophagales	Chitinophagaceae	Paraflavitalea	Paraflavitalea soli
UP000281985	2479847	3191	Dokdonia sinensis	Bacteria	Bacteroidetes	Flavobacteriia	Flavobacteriales	Flavobacteriaceae	Dokdonia	Dokdonia sinensis
UP000190460	92487	3906	Thiothrix eikelboomii	Bacteria	Proteobacteria	Gammaproteobacteria	Thiotrichales	Thiotrichaceae	Thiothrix	Thiothrix eikelboomii
UP000240505	2072590	5145	Massilia armeniaca	Bacteria	Proteobacteria	Betaproteobacteria	Burkholderiales	Oxalobacteraceae	Massilia	Massilia armeniaca
UP000029640	1265313	2860	Pseudohaliea rubra DSM 19751	Bacteria	Proteobacteria	Gammaproteobacteria	Cellvibrionales	Halieaceae	Pseudohaliea	Pseudohaliea rubra
UP000263833	2292257	3125	Sphingorhabdus sp. GY_G	Bacteria	Proteobacteria	Alphaproteobacteria	Sphingomonadales	Sphingomonadaceae	Sphingorhabdus	Sphingorhabdus sp. GY_G
UP000280008	386892	3787	Frondihabitans australicus	Bacteria	Actinobacteria	Actinobacteria	Micrococcales	Microbacteriaceae	Frondihabitans	Frondihabitans australicus
UP000198714	1502753	6505	Paenibacillus sp. UNC496MF	Bacteria	Firmicutes	Bacilli	Bacillales	Paenibacillaceae	Paenibacillus	Paenibacillus sp. UNC496MF
UP000287853	1859131	4071	Candidatus Electrothrix aarhusiensis	Bacteria	Proteobacteria	Deltaproteobacteria	Desulfobacterales	Desulfobulbaceae	Candidatus Electrothrix	Candidatus Electrothrix aarhusiensis
UP000076310	1524462	3386	Rhodanobacter sp. FW510-R10	Bacteria	Proteobacteria	Gammaproteobacteria	Xanthomonadales	Rhodanobacteraceae	Rhodanobacter	Rhodanobacter sp. FW510-R10
UP000019753	948458	3558	Actinotalea ferrariae CF5-4	Bacteria	Actinobacteria	Actinobacteria	Micrococcales	Cellulomonadaceae	Actinotalea	Actinotalea ferrariae
UP000029829	1225651	3345	Thalassobacter sp. 16PALIMAR09	Bacteria	Proteobacteria	Alphaproteobacteria	Rhodobacterales	Rhodobacteraceae	Thalassobacter	Thalassobacter sp. 16PALIMAR09
UP000000482	1131462	2936	Dehalobacter sp. CF	Bacteria	Firmicutes	Clostridia	Clostridiales	Peptococcaceae	Dehalobacter	Dehalobacter sp. CF
UP000199127	1798184	3187	Sarcina sp. DSM 11001	Bacteria	Firmicutes	Clostridia	Clostridiales	Clostridiaceae	Sarcina	Sarcina sp. DSM 11001
UP000006294	698758	2384	Amphibacillus xylanus (strain ATCC 51415 / DSM 6626 / JCM 7361 / LMG 17667 / NBRC 15112 / Ep01)	Bacteria	Firmicutes	Bacilli	Bacillales	Bacillaceae	Amphibacillus	Amphibacillus xylanus
UP000003937	134287	576	secondary endosymbiont of Heteropsylla cubana	Bacteria	Proteobacteria	Gammaproteobacteria	Enterobacterales	Enterobacteriaceae	NaV	secondary endosymbiont of Heteropsylla cubana
UP000277858	1749	2761	Acidipropionibacterium jensenii	Bacteria	Actinobacteria	Actinobacteria	Propionibacteriales	Propionibacteriaceae	Acidipropionibacterium	Acidipropionibacterium jensenii
UP000051395	1736431	4143	Nocardioides sp. Root122	Bacteria	Actinobacteria	Actinobacteria	Propionibacteriales	Nocardioidaceae	Nocardioides	Nocardioides sp. Root122
UP000219494	1141890	3454	Sphingomonas guangdongensis	Bacteria	Proteobacteria	Alphaproteobacteria	Sphingomonadales	Sphingomonadaceae	Sphingomonas	Sphingomonas guangdongensis
UP000294321	1720083	1450	Lactobacillus jinshani	Bacteria	Firmicutes	Bacilli	Lactobacillales	Lactobacillaceae	Lactobacillus	Lactobacillus jinshani
UP000000602	177439	3233	Desulfotalea psychrophila (strain LSv54 / DSM 12343)	Bacteria	Proteobacteria	Deltaproteobacteria	Desulfobacterales	Desulfobulbaceae	Desulfotalea	Desulfotalea psychrophila
UP000220034	1690039	3548	Monaibacterium marinum	Bacteria	Proteobacteria	Alphaproteobacteria	Rhodobacterales	Rhodobacteraceae	Monaibacterium	Monaibacterium marinum
UP000019083	1302244	3343	Cutibacterium acnes JCM 18920	Bacteria	Actinobacteria	Actinobacteria	Propionibacteriales	Propionibacteriaceae	Cutibacterium	Cutibacterium acnes
UP000015455	1348657	3813	Thauera terpenica 58Eu	Bacteria	Proteobacteria	Betaproteobacteria	Rhodocyclales	Zoogloeaceae	Thauera	Thauera terpenica
UP000017975	1262890	1746	Eubacterium sp. CAG:581	Bacteria	Firmicutes	Clostridia	Clostridiales	Eubacteriaceae	Eubacterium	Eubacterium sp. CAG:581
UP000198521	1038014	4646	Aquimarina amphilecti	Bacteria	Bacteroidetes	Flavobacteriia	Flavobacteriales	Flavobacteriaceae	Aquimarina	Aquimarina amphilecti
UP000186074	1850254	2691	Arcobacter sp. LPB0137	Bacteria	Proteobacteria	Epsilonproteobacteria	Campylobacterales	Campylobacteraceae	NaV	Arcobacter sp. LPB0137
UP000199139	306541	3011	Halolactibacillus miurensis	Bacteria	Firmicutes	Bacilli	Bacillales	Bacillaceae	Halolactibacillus	Halolactibacillus miurensis
UP000242611	1200302	110	Photobacterium damselae subsp. piscicida DI21	Bacteria	Proteobacteria	Gammaproteobacteria	Vibrionales	Vibrionaceae	Photobacterium	Photobacterium damselae
UP000017919	1262783	2433	Clostridium sp. CAG:242	Bacteria	Firmicutes	Clostridia	Clostridiales	Clostridiaceae	Clostridium	Clostridium sp. CAG:242
UP000198710	1881030	3685	Devosia sp. YR412	Bacteria	Proteobacteria	Alphaproteobacteria	Rhizobiales	Hyphomicrobiaceae	Devosia	Devosia sp. YR412
UP000001006	623	4103	Shigella flexneri	Bacteria	Proteobacteria	Gammaproteobacteria	Enterobacterales	Enterobacteriaceae	Shigella	Shigella flexneri
UP000215459	1642702	3615	Paludifilum halophilum	Bacteria	Firmicutes	Bacilli	Bacillales	Thermoactinomycetaceae	Paludifilum	Paludifilum halophilum
UP000018032	1262836	2286	Clostridium sp. CAG:75	Bacteria	Firmicutes	Clostridia	Clostridiales	Clostridiaceae	Clostridium	Clostridium sp. CAG:75
UP000016900	1235990	825	Candidatus Pantoea carbekii	Bacteria	Proteobacteria	Gammaproteobacteria	Enterobacterales	Erwiniaceae	Pantoea	Candidatus Pantoea carbekii
UP000015347	1123237	5583	Salipiger mucosus DSM 16094	Bacteria	Proteobacteria	Alphaproteobacteria	Rhodobacterales	Rhodobacteraceae	Salipiger	Salipiger mucosus
UP000016895	28173	5540	Vibrio nigripulchritudo	Bacteria	Proteobacteria	Gammaproteobacteria	Vibrionales	Vibrionaceae	Vibrio	Vibrio nigripulchritudo
UP000006844	401053	4177	Terriglobus saanensis (strain ATCC BAA-1853 / DSM 23119 / SP1PR4)	Bacteria	Acidobacteria	Acidobacteriia	Acidobacteriales	Acidobacteriaceae	Terriglobus	Terriglobus saanensis
UP000032221	280871	5405	Mycolicibacterium llatzerense	Bacteria	Actinobacteria	Actinobacteria	Corynebacteriales	Mycobacteriaceae	Mycolicibacterium	Mycolicibacterium llatzerense
UP000031563	1221996	4016	Quasibacillus thermotolerans	Bacteria	Firmicutes	Bacilli	Bacillales	Bacillaceae	Quasibacillus	Quasibacillus thermotolerans
UP000002510	324057	6210	Paenibacillus sp. (strain JDR-2)	Bacteria	Firmicutes	Bacilli	Bacillales	Paenibacillaceae	Paenibacillus	Paenibacillus sp. JDR-2
UP000093514	1413210	3070	Orenia metallireducens	Bacteria	Firmicutes	Clostridia	Halanaerobiales	Halobacteroidaceae	Orenia	Orenia metallireducens
UP000007599	1094466	2649	Flavobacterium indicum (strain DSM 17447 / CIP 109464 / GPTSA100-9)	Bacteria	Bacteroidetes	Flavobacteriia	Flavobacteriales	Flavobacteriaceae	Flavobacterium	Flavobacterium indicum
UP000017118	1345695	4355	Clostridium saccharobutylicum DSM 13864	Bacteria	Firmicutes	Clostridia	Clostridiales	Clostridiaceae	Clostridium	Clostridium saccharobutylicum
UP000281230	2487710	5101	Micromonospora sp. HM5-17	Bacteria	Actinobacteria	Actinobacteria	Micromonosporales	Micromonosporaceae	Micromonospora	Micromonospora sp. HM5-17
UP000029072	1437609	2362	Bifidobacterium callitrichos DSM 23973	Bacteria	Actinobacteria	Actinobacteria	Bifidobacteriales	Bifidobacteriaceae	Bifidobacterium	Bifidobacterium callitrichos
UP000217944	1936991	1686	Lebetimonas natsushimae	Bacteria	Proteobacteria	Epsilonproteobacteria	Nautiliales	Nautiliaceae	Lebetimonas	Lebetimonas natsushimae
UP000316851	872983	623	Mycoplasma neophronis	Bacteria	Tenericutes	Mollicutes	Mycoplasmatales	Mycoplasmataceae	Mycoplasma	Mycoplasma neophronis
UP000273303	2490946	2387	Actinobaculum sp. 352	Bacteria	Actinobacteria	Actinobacteria	Actinomycetales	Actinomycetaceae	Actinobaculum	Actinobaculum sp. 352
UP000255139	216	1960	Helicobacter muridarum	Bacteria	Proteobacteria	Epsilonproteobacteria	Campylobacterales	Helicobacteraceae	Helicobacter	Helicobacter muridarum
UP000001917	521098	3059	Alicyclobacillus acidocaldarius subsp. acidocaldarius (strain ATCC 27009 / DSM 446 / JCM 5260 / NBRC 15652 / NCIMB 11725 / NRRL B-14509 / 104-1A) (Bacillus acidocaldarius)	Bacteria	Firmicutes	Bacilli	Bacillales	Alicyclobacillaceae	Alicyclobacillus	Alicyclobacillus acidocaldarius
UP000323521	1761012	5550	Peptococcaceae bacterium DCMF	Bacteria	Firmicutes	Clostridia	Clostridiales	Peptococcaceae	NaV	Peptococcaceae bacterium DCMF
UP000006599	936594	2588	Lachnoanaerobaculum sp. ICM7	Bacteria	Firmicutes	Clostridia	Clostridiales	Lachnospiraceae	Lachnoanaerobaculum	Lachnoanaerobaculum sp. ICM7
UP000015812	1353530	3188	Bacteriovorax sp. DB6_IX	Bacteria	Proteobacteria	Oligoflexia	Bacteriovoracales	Bacteriovoracaceae	Bacteriovorax	Bacteriovorax sp. DB6_IX
UP000006731	272559	4234	Bacteroides fragilis (strain ATCC 25285 / DSM 2151 / JCM 11019 / NCTC 9343)	Bacteria	Bacteroidetes	Bacteroidia	Bacteroidales	Bacteroidaceae	Bacteroides	Bacteroides fragilis
UP000273368	2486475	2793	Muribaculaceae bacterium Isolate-114 (HZI)	Bacteria	Bacteroidetes	Bacteroidia	Bacteroidales	Muribaculaceae	NaV	Muribaculaceae bacterium Isolate-114 (HZI)
UP000051236	1423734	3260	Lactobacillus composti DSM 18527 = JCM 14202	Bacteria	Firmicutes	Bacilli	Lactobacillales	Lactobacillaceae	Lactobacillus	Lactobacillus composti
UP000198534	1048340	3137	Marininema mesophilum	Bacteria	Firmicutes	Bacilli	Bacillales	Thermoactinomycetaceae	Marininema	Marininema mesophilum
UP000293662	1510026	7730	Streptomyces sp. F001	Bacteria	Actinobacteria	Actinobacteria	Streptomycetales	Streptomycetaceae	Streptomyces	Streptomyces sp. F001
UP000002744	537021	1102	Liberibacter asiaticus (strain psy62)	Bacteria	Proteobacteria	Alphaproteobacteria	Rhizobiales	Rhizobiaceae	Liberibacter	Candidatus Liberibacter asiaticus
UP000078145	1840095	6040	Streptomyces sp. F-3	Bacteria	Actinobacteria	Actinobacteria	Streptomycetales	Streptomycetaceae	Streptomyces	Streptomyces sp. F-3
UP000033425	1263625	3732	Microbacterium sp. SA39	Bacteria	Actinobacteria	Actinobacteria	Micrococcales	Microbacteriaceae	Microbacterium	Microbacterium sp. SA39
UP000263748	2060726	4290	Neorhizobium sp. SOG26	Bacteria	Proteobacteria	Alphaproteobacteria	Rhizobiales	Rhizobiaceae	Neorhizobium	Neorhizobium sp. SOG26
UP000092695	1548547	3565	Woeseia oceani	Bacteria	Proteobacteria	Gammaproteobacteria	Chromatiales	Woeseiaceae	Woeseia	Woeseia oceani
UP000035661	315358	1180	Spiroplasma eriocheiris	Bacteria	Tenericutes	Mollicutes	Entomoplasmatales	Spiroplasmataceae	Spiroplasma	Spiroplasma eriocheiris
UP000032409	1912856	1528	Peptoniphilus sp. ING2-D1G	Bacteria	Firmicutes	Tissierellia	Tissierellales	Peptoniphilaceae	Peptoniphilus	Peptoniphilus sp. ING2-D1G
UP000261764	572419	715	Mycoplasma amphoriforme A39	Bacteria	Tenericutes	Mollicutes	Mycoplasmatales	Mycoplasmataceae	Mycoplasma	Mycoplasma amphoriforme
UP000265719	483545	4067	Thermobifida halotolerans	Bacteria	Actinobacteria	Actinobacteria	Streptosporangiales	Nocardiopsaceae	Thermobifida	Thermobifida halotolerans
UP000186530	1261635	2925	Roseburia sp. 831b	Bacteria	Firmicutes	Clostridia	Clostridiales	Lachnospiraceae	Roseburia	Roseburia sp. 831b
UP000251692	2080288	3170	Pontibacter sp. 2b14	Bacteria	Bacteroidetes	Cytophagia	Cytophagales	Hymenobacteraceae	Pontibacter	Pontibacter sp. 2b14
UP000018363	1262788	1540	Clostridium sp. CAG:269	Bacteria	Firmicutes	Clostridia	Clostridiales	Clostridiaceae	Clostridium	Clostridium sp. CAG:269
UP000032512	285983	3465	Bacillus subterraneus	Bacteria	Firmicutes	Bacilli	Bacillales	Bacillaceae	Bacillus	Bacillus subterraneus
UP000001626	580327	2583	Thermoanaerobacterium thermosaccharolyticum (strain ATCC 7956 / DSM 571 / NCIB 9385 / NCA 3814) (Clostridium thermosaccharolyticum)	Bacteria	Firmicutes	Clostridia	Thermoanaerobacterales	Thermoanaerobacterales Family III. Incertae Sedis	Thermoanaerobacterium	Thermoanaerobacterium thermosaccharolyticum
UP000290624	2072026	2639	Propionibacteriaceae bacterium VG341	Bacteria	Actinobacteria	Actinobacteria	Propionibacteriales	Propionibacteriaceae	Brevilactibacter	Brevilactibacter flavus
UP000053235	388408	4993	Labrenzia alexandrii	Bacteria	Proteobacteria	Alphaproteobacteria	Rhodobacterales	Rhodobacteraceae	Labrenzia	Labrenzia alexandrii
UP000000323	525904	2827	Thermobaculum terrenum (strain ATCC BAA-798 / YNP1)	Bacteria	NaV	NaV	NaV	NaV	Thermobaculum	Thermobaculum terrenum
UP000196124	1434822	2923	Actinomycetales bacterium JB111	Bacteria	Actinobacteria	Actinobacteria	Actinomycetales	NaV	NaV	Actinomycetales bacterium JB111
UP000269154	1458930	6134	Okeania hirsuta	Bacteria	Cyanobacteria	NaV	Oscillatoriales	Oscillatoriaceae	Okeania	Okeania hirsuta
UP000289841	29552	1645	Acholeplasma axanthum	Bacteria	Tenericutes	Mollicutes	Acholeplasmatales	Acholeplasmataceae	Acholeplasma	Acholeplasma axanthum
UP000295304	1773489	2811	Varunaivibrio sulfuroxidans	Bacteria	Proteobacteria	Alphaproteobacteria	Rhodospirillales	Rhodospirillaceae	Varunaivibrio	Varunaivibrio sulfuroxidans
UP000199293	1520819	2644	Ruminococcaceae bacterium YRB3002	Bacteria	Firmicutes	Clostridia	Clostridiales	Ruminococcaceae	NaV	Ruminococcaceae bacterium YRB3002
UP000007523	1116391	7018	Paenibacillus mucilaginosus 3016	Bacteria	Firmicutes	Bacilli	Bacillales	Paenibacillaceae	Paenibacillus	Paenibacillus mucilaginosus
UP000028725	394096	8967	Hyalangium minutum	Bacteria	Proteobacteria	Deltaproteobacteria	Myxococcales	Archangiaceae	Hyalangium	Hyalangium minutum
UP000070539	36847	2804	Anaerotignum neopropionicum	Bacteria	Firmicutes	Clostridia	Clostridiales	Lachnospiraceae	Anaerotignum	Anaerotignum neopropionicum
UP000005632	158190	3150	Sphaerochaeta pleomorpha (strain ATCC BAA-1885 / DSM 22778 / Grapes)	Bacteria	Spirochaetes	Spirochaetia	Spirochaetales	Spirochaetaceae	Sphaerochaeta	Sphaerochaeta pleomorpha
UP000008234	699246	1566	Mageeibacillus indolicus (strain UPII9-5) (Clostridiales genomosp. BVAB3 (strain UPII9-5))	Bacteria	Firmicutes	Clostridia	Clostridiales	Hungateiclostridiaceae	Mageeibacillus	Mageeibacillus indolicus
UP000075583	279360	3632	Roseivirga ehrenbergii	Bacteria	Bacteroidetes	Cytophagia	Cytophagales	Flammeovirgaceae	Roseivirga	Roseivirga ehrenbergii
UP000242425	2005262	473	Legionella endosymbiont of Polyplax serrata	Bacteria	Proteobacteria	Gammaproteobacteria	Legionellales	Legionellaceae	Legionella	Legionella endosymbiont of Polyplax serrata
UP000033452	43658	4390	Pseudoalteromonas rubra	Bacteria	Proteobacteria	Gammaproteobacteria	Alteromonadales	Pseudoalteromonadaceae	Pseudoalteromonas	Pseudoalteromonas rubra
UP000054935	441103	4206	Tropicibacter naphthalenivorans	Bacteria	Proteobacteria	Alphaproteobacteria	Rhodobacterales	Rhodobacteraceae	Tropicibacter	Tropicibacter naphthalenivorans
UP000268007	423350	5778	Mucilaginibacter gracilis	Bacteria	Bacteroidetes	Sphingobacteriia	Sphingobacteriales	Sphingobacteriaceae	Mucilaginibacter	Mucilaginibacter gracilis
UP000051357	1736291	3232	Curtobacterium sp. Leaf183	Bacteria	Actinobacteria	Actinobacteria	Micrococcales	Microbacteriaceae	Curtobacterium	Curtobacterium sp. Leaf183
UP000031400	1463156	3302	Flavihumibacter sp. ZG627	Bacteria	Bacteroidetes	Chitinophagia	Chitinophagales	Chitinophagaceae	Flavihumibacter	Flavihumibacter sp. ZG627
UP000230407	2665496	5703	Streptomyces carminius	Bacteria	Actinobacteria	Actinobacteria	Streptomycetales	Streptomycetaceae	Streptomyces	Streptomyces carminius
UP000268615	82993	3875	Buttiauxella warmboldiae	Bacteria	Proteobacteria	Gammaproteobacteria	Enterobacterales	Enterobacteriaceae	Buttiauxella	Buttiauxella warmboldiae
UP000199321	227084	3476	Ulvibacter litoralis	Bacteria	Bacteroidetes	Flavobacteriia	Flavobacteriales	Flavobacteriaceae	Ulvibacter	Ulvibacter litoralis
UP000078532	1838280	3325	Desulfotomaculum copahuensis	Bacteria	Firmicutes	Clostridia	Clostridiales	Peptococcaceae	Desulfotomaculum	Desulfotomaculum copahuensis
UP000017993	1262970	1341	Subdoligranulum sp. CAG:314	Bacteria	Firmicutes	Clostridia	Clostridiales	Ruminococcaceae	Subdoligranulum	Subdoligranulum sp. CAG:314
UP000027604	1349767	5488	Janthinobacterium agaricidamnosum NBRC 102515 = DSM 9628	Bacteria	Proteobacteria	Betaproteobacteria	Burkholderiales	Oxalobacteraceae	Janthinobacterium	Janthinobacterium agaricidamnosum
UP000198510	1075417	5672	Catalinimonas alkaloidigena	Bacteria	Bacteroidetes	Cytophagia	Cytophagales	Catalimonadaceae	Catalinimonas	Catalinimonas alkaloidigena
UP000243255	1121321	2538	Asaccharospora irregularis DSM 2635	Bacteria	Firmicutes	Clostridia	Clostridiales	Peptostreptococcaceae	Asaccharospora	Asaccharospora irregularis
UP000004923	626939	2148	Phascolarctobacterium succinatutens YIT 12067	Bacteria	Firmicutes	Negativicutes	Acidaminococcales	Acidaminococcaceae	Phascolarctobacterium	Phascolarctobacterium succinatutens
UP000244496	2169400	3779	Gemmobacter sp. HYN0069	Bacteria	Proteobacteria	Alphaproteobacteria	Rhodobacterales	Rhodobacteraceae	Gemmobacter	Gemmobacter sp. HYN0069
UP000243657	1160091	1550	Alloscardovia macacae	Bacteria	Actinobacteria	Actinobacteria	Bifidobacteriales	Bifidobacteriaceae	Alloscardovia	Alloscardovia macacae
UP000031419	28042	3222	Saccharopolyspora rectivirgula	Bacteria	Actinobacteria	Actinobacteria	Pseudonocardiales	Pseudonocardiaceae	Saccharopolyspora	Saccharopolyspora rectivirgula
UP000253204	2282306	4010	Halomonas sp. TQ8S	Bacteria	Proteobacteria	Gammaproteobacteria	Oceanospirillales	Halomonadaceae	Halomonas	Halomonas sp. TQ8S
UP000270973	2268026	5998	Runella sp. SP2	Bacteria	Bacteroidetes	Cytophagia	Cytophagales	Cytophagaceae	Runella	Runella sp. SP2
UP000265366	1784712	3955	Erythrobacter xanthus	Bacteria	Proteobacteria	Alphaproteobacteria	Sphingomonadales	Erythrobacteraceae	Erythrobacter	Erythrobacter xanthus
UP000051463	1225657	3527	Loktanella sp. 3ANDIMAR09	Bacteria	Proteobacteria	Alphaproteobacteria	Rhodobacterales	Rhodobacteraceae	Loktanella	Loktanella sp. 3ANDIMAR09
UP000216230	2021690	5220	Bacillus sp. 7586-K	Bacteria	Firmicutes	Bacilli	Bacillales	Bacillaceae	Bacillus	Bacillus sp. 7586-K
UP000002484	298654	7079	Frankia inefficax (strain DSM 45817 / CECT 9037 / EuI1c)	Bacteria	Actinobacteria	Actinobacteria	Frankiales	Frankiaceae	Frankia	Frankia inefficax
UP000030107	1517682	1856	Porphyromonadaceae bacterium COT-184 OH4590	Bacteria	Bacteroidetes	Bacteroidia	Bacteroidales	Porphyromonadaceae	NaV	Porphyromonadaceae bacterium COT-184 OH4590
UP000196125	474394	4312	Vibrio mangrovi	Bacteria	Proteobacteria	Gammaproteobacteria	Vibrionales	Vibrionaceae	Vibrio	Vibrio mangrovi
UP000197153	1441467	6034	Nitrospirillum amazonense CBAmc	Bacteria	Proteobacteria	Alphaproteobacteria	Rhodospirillales	Rhodospirillaceae	Nitrospirillum	Nitrospirillum amazonense
UP000199021	478744	4889	Lewinella agarilytica	Bacteria	Bacteroidetes	Saprospiria	Saprospirales	Lewinellaceae	Lewinella	Lewinella agarilytica
UP000307087	574700	3779	Nocardioides caeni	Bacteria	Actinobacteria	Actinobacteria	Propionibacteriales	Nocardioidaceae	Nocardioides	Nocardioides caeni
UP000032323	103808	6266	Rhodococcus sp. AD45	Bacteria	Actinobacteria	Actinobacteria	Corynebacteriales	Nocardiaceae	Rhodococcus	Rhodococcus sp. AD45
UP000007939	760011	1819	Sphaerochaeta coccoides (strain ATCC BAA-1237 / DSM 17374 / SPN1) (Spirochaeta coccoides)	Bacteria	Spirochaetes	Spirochaetia	Spirochaetales	Spirochaetaceae	Sphaerochaeta	Sphaerochaeta coccoides
UP000001551	663278	2663	Ethanoligenens harbinense (strain DSM 18485 / JCM 12961 / CGMCC 1.5033 / YUAN-3)	Bacteria	Firmicutes	Clostridia	Clostridiales	Ruminococcaceae	Ethanoligenens	Ethanoligenens harbinense
UP000009235	443218	4703	Hoyosella subflava (strain DSM 45089 / JCM 17490 / NBRC 109087 / DQS3-9A1) (Amycolicicoccus subflavus)	Bacteria	Actinobacteria	Actinobacteria	Corynebacteriales	Mycobacteriaceae	Hoyosella	Hoyosella subflava
UP000004137	1000569	1512	Megasphaera sp. UPII 135-E	Bacteria	Firmicutes	Negativicutes	Veillonellales	Veillonellaceae	Megasphaera	Megasphaera sp. UPII 135-E
UP000035860	743974	1900	Moraxella bovoculi 237	Bacteria	Proteobacteria	Gammaproteobacteria	Pseudomonadales	Moraxellaceae	Moraxella	Moraxella bovoculi
UP000011666	1223545	4907	Gordonia soli NBRC 108243	Bacteria	Actinobacteria	Actinobacteria	Corynebacteriales	Gordoniaceae	Gordonia	Gordonia soli
UP000185615	1928617	5021	Bacillus sp. MRMR6	Bacteria	Firmicutes	Bacilli	Bacillales	Bacillaceae	Bacillus	Bacillus sp. MRMR6
UP000001982	318161	3727	Shewanella denitrificans (strain OS217 / ATCC BAA-1090 / DSM 15013)	Bacteria	Proteobacteria	Gammaproteobacteria	Alteromonadales	Shewanellaceae	Shewanella	Shewanella denitrificans
UP000297890	2305248	2722	Candidatus Macondimonas diazotrophica	Bacteria	Proteobacteria	Gammaproteobacteria	Chromatiales	Ectothiorhodospiraceae	Candidatus Macondimonas	Candidatus Macondimonas diazotrophica
UP000284395	2320269	3349	Altererythrobacter sp. HN-Y73	Bacteria	Proteobacteria	Alphaproteobacteria	Sphingomonadales	Erythrobacteraceae	Altererythrobacter	Altererythrobacter sp. HN-Y73
UP000220133	2029983	4319	Chitinophaga caeni	Bacteria	Bacteroidetes	Chitinophagia	Chitinophagales	Chitinophagaceae	Chitinophaga	Chitinophaga caeni
UP000184514	696762	4128	Planktotalea frisia	Bacteria	Proteobacteria	Alphaproteobacteria	Rhodobacterales	Rhodobacteraceae	Planktotalea	Planktotalea frisia
UP000199611	39841	2661	Thermodesulforhabdus norvegica	Bacteria	Proteobacteria	Deltaproteobacteria	Syntrophobacterales	Syntrophobacteraceae	Thermodesulforhabdus	Thermodesulforhabdus norvegica
UP000000534	292805	805	Wolbachia sp. subsp. Brugia malayi (strain TRS)	Bacteria	Proteobacteria	Alphaproteobacteria	Rickettsiales	Anaplasmataceae	Wolbachia	Wolbachia endosymbiont of Brugia malayi
UP000318801	2590451	4394	Martelella sp. BGMRC2036	Bacteria	Proteobacteria	Alphaproteobacteria	Rhizobiales	Aurantimonadaceae	Martelella	Martelella sp. BGMRC2036
UP000235589	1981510	2258	Monoglobus pectinilyticus	Bacteria	Firmicutes	Clostridia	Clostridiales	NaV	Monoglobus	Monoglobus pectinilyticus
UP000051672	1423727	1863	Lactobacillus brantae DSM 23927	Bacteria	Firmicutes	Bacilli	Lactobacillales	Lactobacillaceae	Lactobacillus	Lactobacillus brantae
UP000276232	763993	3389	Pseudokineococcus lusitanus	Bacteria	Actinobacteria	Actinobacteria	Kineosporiales	Kineosporiaceae	Pseudokineococcus	Pseudokineococcus lusitanus
UP000053380	915437	299	Saccharibacillus sacchari DSM 19268	Bacteria	Firmicutes	Bacilli	Bacillales	Paenibacillaceae	Saccharibacillus	Saccharibacillus sacchari
UP000070230	1759557	2889	Sporosarcina sp. HYO08	Bacteria	Firmicutes	Bacilli	Bacillales	Planococcaceae	Sporosarcina	Sporosarcina sp. HYO08
UP000076577	989403	4634	Pseudovibrio axinellae	Bacteria	Proteobacteria	Alphaproteobacteria	Rhodobacterales	Rhodobacteraceae	Pseudovibrio	Pseudovibrio axinellae
UP000018396	1262978	2920	Tannerella sp. CAG:118	Bacteria	Bacteroidetes	Bacteroidia	Bacteroidales	Tannerellaceae	Tannerella	Tannerella sp. CAG:118
UP000268274	2320109	3732	bacterium C-53	Bacteria	NaV	NaV	NaV	NaV	NaV	bacterium C-53
UP000017819	631454	4164	Lutibaculum baratangense AMV1	Bacteria	Proteobacteria	Alphaproteobacteria	Rhizobiales	Rhodobiaceae	Lutibaculum	Lutibaculum baratangense
UP000002033	582899	3452	Hyphomicrobium denitrificans (strain ATCC 51888 / DSM 1869 / NCIB 11706 / TK 0415)	Bacteria	Proteobacteria	Alphaproteobacteria	Rhizobiales	Hyphomicrobiaceae	Hyphomicrobium	Hyphomicrobium denitrificans
UP000235547	1684789	3488	Halomonas urumqiensis	Bacteria	Proteobacteria	Gammaproteobacteria	Oceanospirillales	Halomonadaceae	Halomonas	Halomonas urumqiensis
UP000006639	696127	1181	Midichloria mitochondrii (strain IricVA)	Bacteria	Proteobacteria	Alphaproteobacteria	Rickettsiales	Candidatus Midichloriaceae	Candidatus Midichloria	Candidatus Midichloria mitochondrii
UP000283787	1891238	2341	Burkholderiales bacterium	Bacteria	Proteobacteria	Betaproteobacteria	Burkholderiales	NaV	NaV	Burkholderiales bacterium
UP000324781	659425	2603	Thermoclostridium caenicola	Bacteria	Firmicutes	Clostridia	Clostridiales	Hungateiclostridiaceae	Thermoclostridium	Thermoclostridium caenicola
UP000186828	1835005	7942	Saccharothrix sp. CB00851	Bacteria	Actinobacteria	Actinobacteria	Pseudonocardiales	Pseudonocardiaceae	Saccharothrix	Saccharothrix sp. CB00851
UP000030960	561184	5714	Mameliella alba	Bacteria	Proteobacteria	Alphaproteobacteria	Rhodobacterales	Rhodobacteraceae	Mameliella	Mameliella alba
UP000308181	2571271	3357	Pedobacter sp. AR-3-17	Bacteria	Bacteroidetes	Sphingobacteriia	Sphingobacteriales	Sphingobacteriaceae	Pedobacter	Pedobacter sp. AR-3-17
UP000198923	504805	6239	Sinosporangium album	Bacteria	Actinobacteria	Actinobacteria	Streptosporangiales	Streptosporangiaceae	Sinosporangium	Sinosporangium album
UP000027997	305900	4147	Endozoicomonas elysicola	Bacteria	Proteobacteria	Gammaproteobacteria	Oceanospirillales	Endozoicomonadaceae	Endozoicomonas	Endozoicomonas elysicola
UP000278036	2382222	5527	Roseomonas sp. Z24	Bacteria	Proteobacteria	Alphaproteobacteria	Rhodospirillales	Acetobacteraceae	Roseomonas	Roseomonas sp. Z24
UP000034392	1267766	3254	Altererythrobacter atlanticus	Bacteria	Proteobacteria	Alphaproteobacteria	Sphingomonadales	Erythrobacteraceae	Altererythrobacter	Altererythrobacter atlanticus
UP000316252	2590779	3272	Schumannella sp. 10F1D-1	Bacteria	Actinobacteria	Actinobacteria	Micrococcales	Microbacteriaceae	Schumannella	Schumannella sp. 10F1D-1
UP000257855	2107713	3244	Aeromicrobium sp. A1-2	Bacteria	Actinobacteria	Actinobacteria	Propionibacteriales	Nocardioidaceae	Aeromicrobium	Aeromicrobium sp. A1-2
UP000029096	1437606	1631	Bifidobacterium bohemicum DSM 22767	Bacteria	Actinobacteria	Actinobacteria	Bifidobacteriales	Bifidobacteriaceae	Bifidobacterium	Bifidobacterium bohemicum
UP000184074	1508389	3230	Cognatiyoonia sediminum	Bacteria	Proteobacteria	Alphaproteobacteria	Rhodobacterales	Rhodobacteraceae	Cognatiyoonia	Cognatiyoonia sediminum
UP000238650	1686285	2663	Leucobacter massiliensis	Bacteria	Actinobacteria	Actinobacteria	Micrococcales	Microbacteriaceae	Leucobacter	Leucobacter massiliensis
UP000004728	983920	3800	Novosphingobium nitrogenifigens DSM 19370	Bacteria	Proteobacteria	Alphaproteobacteria	Sphingomonadales	Sphingomonadaceae	Novosphingobium	Novosphingobium nitrogenifigens
UP000263162	2306574	3413	Clostridiales bacterium AM23-16LB	Bacteria	Firmicutes	Clostridia	Clostridiales	NaV	NaV	Clostridiales bacterium AM23-16LB
UP000292686	592376	3277	Agromyces atrinae	Bacteria	Actinobacteria	Actinobacteria	Micrococcales	Microbacteriaceae	Agromyces	Agromyces atrinae
UP000003704	1172194	4474	Hydrocarboniphaga effusa AP103	Bacteria	Proteobacteria	Gammaproteobacteria	Nevskiales	Sinobacteraceae	Hydrocarboniphaga	Hydrocarboniphaga effusa
UP000016843	1123057	4904	Rhodonellum psychrophilum GCM71 = DSM 17998	Bacteria	Bacteroidetes	Cytophagia	Cytophagales	Cytophagaceae	Rhodonellum	Rhodonellum psychrophilum
UP000182608	1916956	2626	Synechococcus sp. SynAce01	Bacteria	Cyanobacteria	NaV	Synechococcales	Synechococcaceae	Synechococcus	Synechococcus sp. SynAce01
UP000018042	1262875	1726	Eggerthella sp. CAG:209	Bacteria	Actinobacteria	Coriobacteriia	Eggerthellales	Eggerthellaceae	Eggerthella	Eggerthella sp. CAG:209
UP000013232	1123367	3836	Thauera linaloolentis 47Lol = DSM 12138	Bacteria	Proteobacteria	Betaproteobacteria	Rhodocyclales	Zoogloeaceae	Thauera	Thauera linaloolentis
UP000251577	2055947	1960	Corynebacterium heidelbergense	Bacteria	Actinobacteria	Actinobacteria	Corynebacteriales	Corynebacteriaceae	Corynebacterium	Corynebacterium heidelbergense
UP000195674	1965650	2381	Alistipes sp. An66	Bacteria	Bacteroidetes	Bacteroidia	Bacteroidales	Rikenellaceae	Alistipes	Alistipes sp. An66
UP000292063	2512157	6267	Rhizobium sp. BK696	Bacteria	Proteobacteria	Alphaproteobacteria	Rhizobiales	Rhizobiaceae	Rhizobium	Rhizobium sp. BK696
UP000017050	1203578	5313	Pseudomonas sp. HPB0071	Bacteria	Proteobacteria	Gammaproteobacteria	Pseudomonadales	Pseudomonadaceae	Pseudomonas	Pseudomonas sp. HPB0071
UP000281544	1258920	3773	Arthrobacter sp. MDT2-14	Bacteria	Actinobacteria	Actinobacteria	Micrococcales	Micrococcaceae	Arthrobacter	Arthrobacter sp. MDT2-14
UP000325218	862114	5445	Paenibacillus faecis	Bacteria	Firmicutes	Bacilli	Bacillales	Paenibacillaceae	Paenibacillus	Paenibacillus faecis
UP000320801	458208	686	Mycoplasma mucosicanis	Bacteria	Tenericutes	Mollicutes	Mycoplasmatales	Mycoplasmataceae	Mycoplasma	Mycoplasma mucosicanis
UP000000806	272631	1603	Mycobacterium leprae (strain TN)	Bacteria	Actinobacteria	Actinobacteria	Corynebacteriales	Mycobacteriaceae	Mycobacterium	Mycobacterium leprae
UP000297351	2561925	2779	Brevundimonas sp. S30B	Bacteria	Proteobacteria	Alphaproteobacteria	Caulobacterales	Caulobacteraceae	Brevundimonas	Brevundimonas sp. S30B
UP000290879	2489218	2762	Muribaculaceae bacterium Isolate-013 (NCI)	Bacteria	Bacteroidetes	Bacteroidia	Bacteroidales	Muribaculaceae	NaV	Muribaculaceae bacterium Isolate-013 (NCI)
UP000250931	1914304	3663	Arthrobacter sp. AQ5-06	Bacteria	Actinobacteria	Actinobacteria	Micrococcales	Micrococcaceae	Arthrobacter	Arthrobacter sp. AQ5-06
UP000319449	345631	3944	Geobacter argillaceus	Bacteria	Proteobacteria	Deltaproteobacteria	Desulfuromonadales	Geobacteraceae	Geobacter	Geobacter argillaceus
UP000184932	1217970	4018	Oceanicola litoreus	Bacteria	Proteobacteria	Alphaproteobacteria	Rhodobacterales	Rhodobacteraceae	Oceanicola	Oceanicola litoreus
UP000002742	583345	2334	Methylotenera mobilis (strain JLW8 / ATCC BAA-1282 / DSM 17540)	Bacteria	Proteobacteria	Betaproteobacteria	Nitrosomonadales	Methylophilaceae	Methylotenera	Methylotenera mobilis
UP000003340	537013	3907	[Clostridium] methylpentosum DSM 5476	Bacteria	Firmicutes	Clostridia	Clostridiales	Ruminococcaceae	NaV	[Clostridium] methylpentosum
UP000245535	379075	5031	Sediminitomix flava	Bacteria	Bacteroidetes	Cytophagia	Cytophagales	Flammeovirgaceae	Sediminitomix	Sediminitomix flava
UP000018084	1262812	1535	Clostridium sp. CAG:470	Bacteria	Firmicutes	Clostridia	Clostridiales	Clostridiaceae	Clostridium	Clostridium sp. CAG:470
UP000293865	205332	3965	Agromyces albus	Bacteria	Actinobacteria	Actinobacteria	Micrococcales	Microbacteriaceae	Agromyces	Agromyces albus
UP000297635	2530391	2847	Duncaniella sp. TLL-A3	Bacteria	Bacteroidetes	Bacteroidia	Bacteroidales	Muribaculaceae	Duncaniella	Duncaniella sp. TLL-A3
UP000197535	1968433	5003	Noviherbaspirillum denitrificans	Bacteria	Proteobacteria	Betaproteobacteria	Burkholderiales	Oxalobacteraceae	Noviherbaspirillum	Noviherbaspirillum denitrificans
UP000008543	228400	1971	Histophilus somni (strain 2336) (Haemophilus somnus)	Bacteria	Proteobacteria	Gammaproteobacteria	Pasteurellales	Pasteurellaceae	Histophilus	Histophilus somni
UP000242687	1457233	3606	Mucilaginibacter auburnensis	Bacteria	Bacteroidetes	Sphingobacteriia	Sphingobacteriales	Sphingobacteriaceae	Mucilaginibacter	Mucilaginibacter auburnensis
UP000066480	571913	4674	Luteipulveratus mongoliensis	Bacteria	Actinobacteria	Actinobacteria	Micrococcales	Dermacoccaceae	Luteipulveratus	Luteipulveratus mongoliensis
UP000236745	568106	5061	Marinobacterium lutimaris	Bacteria	Proteobacteria	Gammaproteobacteria	Oceanospirillales	Oceanospirillaceae	Marinobacterium	Marinobacterium lutimaris
UP000248555	581036	3513	Anoxybacillus vitaminiphilus	Bacteria	Firmicutes	Bacilli	Bacillales	Bacillaceae	Anoxybacillus	Anoxybacillus vitaminiphilus
UP000012015	1276920	4017	Paeniglutamicibacter gangotriensis Lz1y	Bacteria	Actinobacteria	Actinobacteria	Micrococcales	Micrococcaceae	Paeniglutamicibacter	Paeniglutamicibacter gangotriensis
UP000012139	1085538	6014	Leptospira interrogans serovar Bataviae str. HAI135	Bacteria	Spirochaetes	Spirochaetia	Leptospirales	Leptospiraceae	Leptospira	Leptospira interrogans
UP000199163	568899	3572	Alteribacillus persepolensis	Bacteria	Firmicutes	Bacilli	Bacillales	Bacillaceae	Alteribacillus	Alteribacillus persepolensis
UP000018068	1262749	2561	Bacteroides sp. CAG:714	Bacteria	Bacteroidetes	Bacteroidia	Bacteroidales	Bacteroidaceae	Bacteroides	Bacteroides sp. CAG:714
UP000310168	2528966	2664	Brachyspira catarrhinii	Bacteria	Spirochaetes	Spirochaetia	Brachyspirales	Brachyspiraceae	Brachyspira	Brachyspira catarrhinii
UP000186302	1544451	3929	Thalassospira sp. TSL5-1	Bacteria	Proteobacteria	Alphaproteobacteria	Rhodospirillales	Rhodospirillaceae	Thalassospira	Thalassospira sp. TSL5-1
UP000273022	342950	3857	Parashewanella spongiae	Bacteria	Proteobacteria	Gammaproteobacteria	Alteromonadales	Shewanellaceae	Parashewanella	Parashewanella spongiae
UP000193862	1519096	3316	Aquimixticola soesokkakensis	Bacteria	Proteobacteria	Alphaproteobacteria	Rhodobacterales	Rhodobacteraceae	Aquimixticola	Aquimixticola soesokkakensis
UP000310506	2508885	2379	Vagococcus sp. 2B-2	Bacteria	Firmicutes	Bacilli	Lactobacillales	Enterococcaceae	Vagococcus	Vagococcus silagei
UP000246145	305977	3863	Pusillimonas noertemannii	Bacteria	Proteobacteria	Betaproteobacteria	Burkholderiales	Alcaligenaceae	Pusillimonas	Pusillimonas noertemannii
UP000230551	85968	3575	Mycolicibacterium brumae	Bacteria	Actinobacteria	Actinobacteria	Corynebacteriales	Mycobacteriaceae	Mycolicibacterium	Mycolicibacterium brumae
UP000008808	314225	2999	Erythrobacter litoralis (strain HTCC2594)	Bacteria	Proteobacteria	Alphaproteobacteria	Sphingomonadales	Erythrobacteraceae	Erythrobacter	Erythrobacter litoralis
UP000004374	562729	3730	Rheinheimera nanhaiensis E407-8	Bacteria	Proteobacteria	Gammaproteobacteria	Chromatiales	Chromatiaceae	Rheinheimera	Rheinheimera nanhaiensis
UP000242361	1520829	1688	Peptostreptococcaceae bacterium pGA-8	Bacteria	Firmicutes	Clostridia	Clostridiales	Peptostreptococcaceae	NaV	Peptostreptococcaceae bacterium pGA-8
UP000255036	1812858	3531	Anaerosacchriphilus polymeriproducens	Bacteria	Firmicutes	Clostridia	Clostridiales	Lachnospiraceae	Anaerosacchariphilus	Anaerosacchriphilus polymeriproducens
UP000006860	756272	4710	Rubinisphaera brasiliensis (strain ATCC 49424 / DSM 5305 / JCM 21570 / NBRC 103401 / IFAM 1448) (Planctomyces brasiliensis)	Bacteria	Planctomycetes	Planctomycetia	Planctomycetales	Planctomycetaceae	Rubinisphaera	Rubinisphaera brasiliensis
UP000001887	530564	4711	Pirellula staleyi (strain ATCC 27377 / DSM 6068 / ICPB 4128) (Pirella staleyi)	Bacteria	Planctomycetes	Planctomycetia	Pirellulales	Pirellulaceae	Pirellula	Pirellula staleyi
UP000093807	29536	2812	Flavobacterium succinicans	Bacteria	Bacteroidetes	Flavobacteriia	Flavobacteriales	Flavobacteriaceae	Flavobacterium	Flavobacterium succinicans
UP000225972	1037362	4708	Tropicibacter phthalicicus	Bacteria	Proteobacteria	Alphaproteobacteria	Rhodobacterales	Rhodobacteraceae	Tropicibacter	Tropicibacter phthalicicus
UP000248559	1735453	7049	Streptomyces sp. NTH33	Bacteria	Actinobacteria	Actinobacteria	Streptomycetales	Streptomycetaceae	Streptomyces	Streptomyces sp. NTH33
UP000291106	2520507	3709	Shewanella maritima	Bacteria	Proteobacteria	Gammaproteobacteria	Alteromonadales	Shewanellaceae	Shewanella	Shewanella maritima
UP000292958	388466	6023	Edaphobacter modestus	Bacteria	Acidobacteria	Acidobacteriia	Acidobacteriales	Acidobacteriaceae	Edaphobacter	Edaphobacter modestus
UP000223749	363852	4393	Pedobacter ginsengisoli	Bacteria	Bacteroidetes	Sphingobacteriia	Sphingobacteriales	Sphingobacteriaceae	Pedobacter	Pedobacter ginsengisoli
UP000279600	2496866	2545	Nonlabens sp. MJ115	Bacteria	Bacteroidetes	Flavobacteriia	Flavobacteriales	Flavobacteriaceae	Nonlabens	Nonlabens sp. MJ115
UP000290632	2489215	2861	Muribaculaceae bacterium Isolate-002 (NCI)	Bacteria	Bacteroidetes	Bacteroidia	Bacteroidales	Muribaculaceae	NaV	Muribaculaceae bacterium Isolate-002 (NCI)
UP000295198	2497878	4817	Nocardioides sp. 130	Bacteria	Actinobacteria	Actinobacteria	Propionibacteriales	Nocardioidaceae	Nocardioides	Nocardioides sp. 130
UP000051323	1736345	3242	Sphingomonas sp. Leaf343	Bacteria	Proteobacteria	Alphaproteobacteria	Sphingomonadales	Sphingomonadaceae	Sphingomonas	Sphingomonas sp. Leaf343
UP000018131	1262962	2264	Ruminococcus sp. CAG:57	Bacteria	Firmicutes	Clostridia	Clostridiales	Ruminococcaceae	Ruminococcus	Ruminococcus sp. CAG:57
UP000019488	1423743	3078	Lactobacillus farraginis DSM 18382 = JCM 14108	Bacteria	Firmicutes	Bacilli	Lactobacillales	Lactobacillaceae	Lactobacillus	Lactobacillus farraginis
UP000298246	1967502	4841	Paenibacillus sp. MEC069	Bacteria	Firmicutes	Bacilli	Bacillales	Paenibacillaceae	Paenibacillus	Paenibacillus sp. MEC069
UP000245765	2184016	5423	Roseomonas sp. CQN31	Bacteria	Proteobacteria	Alphaproteobacteria	Rhodospirillales	Acetobacteraceae	Roseomonas	Roseomonas sp. CQN31
UP000002515	223283	5431	Pseudomonas syringae pv. tomato (strain ATCC BAA-871 / DC3000)	Bacteria	Proteobacteria	Gammaproteobacteria	Pseudomonadales	Pseudomonadaceae	Pseudomonas	Pseudomonas syringae group genomosp. 3
UP000297025	402297	2853	Nocardioides daphniae	Bacteria	Actinobacteria	Actinobacteria	Propionibacteriales	Nocardioidaceae	Nocardioides	Nocardioides daphniae
UP000011757	490759	3885	Marinobacter sp. BSs20148	Bacteria	Proteobacteria	Gammaproteobacteria	Alteromonadales	Alteromonadaceae	Marinobacter	Marinobacter sp. BSs20148
UP000318413	301154	2977	Sphingomonas oligophenolica	Bacteria	Proteobacteria	Alphaproteobacteria	Sphingomonadales	Sphingomonadaceae	Sphingomonas	Sphingomonas oligophenolica
UP000033121	1220578	4759	Flavihumibacter petaseus NBRC 106054	Bacteria	Bacteroidetes	Chitinophagia	Chitinophagales	Chitinophagaceae	Flavihumibacter	Flavihumibacter petaseus
UP000009081	272630	6233	Methylorubrum extorquens (strain ATCC 14718 / DSM 1338 / JCM 2805 / NCIMB 9133 / AM1) (Methylobacterium extorquens)	Bacteria	Proteobacteria	Alphaproteobacteria	Rhizobiales	Methylobacteriaceae	Methylorubrum	Methylorubrum extorquens
UP000297258	2562153	4650	Massilia sp. ONC3	Bacteria	Proteobacteria	Betaproteobacteria	Burkholderiales	Oxalobacteraceae	Massilia	Massilia sp. ONC3
UP000041641	1677858	3949	Propionispora sp. 2/2-37	Bacteria	Firmicutes	Negativicutes	Selenomonadales	Sporomusaceae	Propionispora	Propionispora sp. 2/2-37
UP000003148	709797	4236	Bradyrhizobiaceae bacterium SG-6C	Bacteria	Proteobacteria	Alphaproteobacteria	Rhizobiales	Bradyrhizobiaceae	NaV	Bradyrhizobiaceae bacterium SG-6C
UP000216329	2015582	4556	Bacteroidetes bacterium B1(2017)	Bacteria	Bacteroidetes	NaV	NaV	NaV	NaV	Bacteroidetes bacterium B1(2017)
UP000000686	743720	4459	Pseudomonas fulva (strain 12-X)	Bacteria	Proteobacteria	Gammaproteobacteria	Pseudomonadales	Pseudomonadaceae	Pseudomonas	Pseudomonas fulva
UP000001978	272563	3761	Clostridioides difficile (strain 630) (Peptoclostridium difficile)	Bacteria	Firmicutes	Clostridia	Clostridiales	Peptostreptococcaceae	Clostridioides	Clostridioides difficile
UP000318681	2529389	4080	Sphingomonas sp. R4DWN	Bacteria	Proteobacteria	Alphaproteobacteria	Sphingomonadales	Sphingomonadaceae	Sphingomonas	Sphingomonas solaris
UP000283474	2028345	3284	Pusillimonas sp. ye3	Bacteria	Proteobacteria	Betaproteobacteria	Burkholderiales	Alcaligenaceae	Pusillimonas	Pusillimonas sp. ye3
UP000289411	2316527	5222	bacterium RmlP001	Bacteria	Proteobacteria	Alphaproteobacteria	Rhizobiales	Lichenibacteriaceae	Lichenibacterium	Lichenibacterium ramalinae
UP000199169	1860102	4556	Candidatus Accumulibacter aalborgensis	Bacteria	Proteobacteria	Betaproteobacteria	NaV	NaV	Candidatus Accumulibacter	Candidatus Accumulibacter aalborgensis
UP000198931	1125876	2760	Chryseobacterium frigidisoli	Bacteria	Bacteroidetes	Flavobacteriia	Flavobacteriales	Flavobacteriaceae	Chryseobacterium	Chryseobacterium frigidisoli
UP000001636	1029718	1487	Arthromitus sp. (strain SFB-mouse-Japan)	Bacteria	Firmicutes	Clostridia	Clostridiales	Clostridiaceae	Candidatus Arthromitus	Candidatus Arthromitus sp. SFB-mouse
UP000250003	1912897	2737	Blautia sp. N6H1-15	Bacteria	Firmicutes	Clostridia	Clostridiales	Lachnospiraceae	Blautia	Blautia sp. N6H1-15
UP000052066	1736429	4824	Rhizobium sp. Root1212	Bacteria	Proteobacteria	Alphaproteobacteria	Rhizobiales	Rhizobiaceae	Rhizobium	Rhizobium sp. Root1212
UP000293861	2021380	2125	Propionibacteriaceae bacterium	Bacteria	Actinobacteria	Actinobacteria	Propionibacteriales	Propionibacteriaceae	NaV	Propionibacteriaceae bacterium
UP000199308	349064	2994	Thalassotalea agarivorans (Thalassomonas agarivorans)	Bacteria	Proteobacteria	Gammaproteobacteria	Alteromonadales	Colwelliaceae	Thalassotalea	Thalassotalea agarivorans
UP000217083	2670334	3053	Lottiidibacillus patelloidae	Bacteria	Firmicutes	Bacilli	Bacillales	Bacillaceae	Lottiidibacillus	Lottiidibacillus patelloidae
UP000000230	399742	4236	Enterobacter sp. (strain 638)	Bacteria	Proteobacteria	Gammaproteobacteria	Enterobacterales	Enterobacteriaceae	Enterobacter	Enterobacter sp. 638
UP000076021	241244	3235	Rummeliibacillus stabekisii	Bacteria	Firmicutes	Bacilli	Bacillales	Planococcaceae	Rummeliibacillus	Rummeliibacillus stabekisii
UP000295399	1188247	2870	Rhodothalassium salexigens DSM 2132	Bacteria	Proteobacteria	Alphaproteobacteria	Rhodothalassiales	Rhodothalassiaceae	Rhodothalassium	Rhodothalassium salexigens
UP000293664	2510794	2918	Flavobacteriaceae bacterium 144Ye	Bacteria	Bacteroidetes	Flavobacteriia	Flavobacteriales	Flavobacteriaceae	NaV	Flavobacteriaceae bacterium 144Ye
UP000220914	36811	6452	Mycolicibacterium agri (Mycobacterium agri)	Bacteria	Actinobacteria	Actinobacteria	Corynebacteriales	Mycobacteriaceae	Mycolicibacterium	Mycolicibacterium agri
UP000238956	82348	1930	Streptococcus pluranimalium	Bacteria	Firmicutes	Bacilli	Lactobacillales	Streptococcaceae	Streptococcus	Streptococcus pluranimalium
UP000245599	2135643	3567	Simplicispira sp. 125	Bacteria	Proteobacteria	Betaproteobacteria	Burkholderiales	Comamonadaceae	Simplicispira	Simplicispira sp. 125
UP000011616	1198452	5974	Janthinobacterium sp. HH01	Bacteria	Proteobacteria	Betaproteobacteria	Burkholderiales	Oxalobacteraceae	Janthinobacterium	Janthinobacterium sp. HH01
UP000188613	1714355	3171	Domibacillus epiphyticus	Bacteria	Firmicutes	Bacilli	Bacillales	Bacillaceae	Domibacillus	Domibacillus epiphyticus
UP000018861	1235809	3340	Bacteroides pyogenes JCM 6292	Bacteria	Bacteroidetes	Bacteroidia	Bacteroidales	Bacteroidaceae	Bacteroides	Bacteroides pyogenes
UP000199324	1780380	3682	Eubacteriaceae bacterium CHKCI004	Bacteria	Firmicutes	Clostridia	Clostridiales	Eubacteriaceae	NaV	Eubacteriaceae bacterium CHKCI004
UP000219050	1411902	3510	Celeribacter manganoxidans	Bacteria	Proteobacteria	Alphaproteobacteria	Rhodobacterales	Rhodobacteraceae	Celeribacter	Celeribacter manganoxidans
UP000012589	1235802	6154	Eubacterium plexicaudatum ASF492	Bacteria	Firmicutes	Clostridia	Clostridiales	Eubacteriaceae	Eubacterium	Eubacterium plexicaudatum
UP000318437	2528003	5040	Planctomycetes bacterium Pla144	Bacteria	Planctomycetes	NaV	NaV	NaV	NaV	Planctomycetes bacterium Pla144
UP000198960	673521	4606	Blastococcus endophyticus	Bacteria	Actinobacteria	Actinobacteria	Geodermatophilales	Geodermatophilaceae	Blastococcus	Blastococcus endophyticus
UP000051830	1736354	4093	Geodermatophilus sp. Leaf369	Bacteria	Actinobacteria	Actinobacteria	Geodermatophilales	Geodermatophilaceae	Geodermatophilus	Geodermatophilus sp. Leaf369
UP000018009	1263065	4152	Clostridium clostridioforme CAG:132	Bacteria	Firmicutes	Clostridia	Clostridiales	Clostridiaceae	Clostridium	Clostridium clostridioforme CAG:132
UP000244888	2233853	6810	Serratia sp. S1B	Bacteria	Proteobacteria	Gammaproteobacteria	Enterobacterales	Yersiniaceae	Serratia	Serratia sp. S1B
UP000001910	523794	2218	Leptotrichia buccalis (strain ATCC 14201 / DSM 1135 / JCM 12969 / NCTC 10249 / C-1013-b)	Bacteria	Fusobacteria	Fusobacteriia	Fusobacteriales	Leptotrichiaceae	Leptotrichia	Leptotrichia buccalis
UP000319804	33885	2765	Microbacterium lacticum	Bacteria	Actinobacteria	Actinobacteria	Micrococcales	Microbacteriaceae	Microbacterium	Microbacterium lacticum
UP000269414	2491050	1426	Leucobacter sp. OH2974_COT-288	Bacteria	Actinobacteria	Actinobacteria	Micrococcales	Microbacteriaceae	Leucobacter	Leucobacter sp. OH2974_COT-288
UP000287823	1928574	2855	Aliidiomarina soli	Bacteria	Proteobacteria	Gammaproteobacteria	Alteromonadales	Idiomarinaceae	Aliidiomarina	Aliidiomarina soli
UP000199603	265719	3593	Aquimonas voraii	Bacteria	Proteobacteria	Gammaproteobacteria	Xanthomonadales	Rhodanobacteraceae	Aquimonas	Aquimonas voraii
UP000319040	1168039	3615	Saccharicrinis carchari	Bacteria	Bacteroidetes	Bacteroidia	Marinilabiliales	Marinilabiliaceae	Saccharicrinis	Saccharicrinis carchari
UP000233398	2053187	3017	Rhodohalobacter barkolensis	Bacteria	Balneolaeota	Balneolia	Balneolales	Balneolaceae	Rhodohalobacter	Rhodohalobacter barkolensis
UP000280416	2024824	3130	Balneola sp.	Bacteria	Balneolaeota	Balneolia	Balneolales	Balneolaceae	Balneola	Balneola sp.
UP000184520	634436	4313	Marisediminitalea aggregata	Bacteria	Proteobacteria	Gammaproteobacteria	Alteromonadales	Alteromonadaceae	Marisediminitalea	Marisediminitalea aggregata
UP000195119	1970738	2169	Gilliamella apis	Bacteria	Proteobacteria	Gammaproteobacteria	Orbales	Orbaceae	Gilliamella	Gilliamella apis
UP000057181	446860	3024	Kocuria flava	Bacteria	Actinobacteria	Actinobacteria	Micrococcales	Micrococcaceae	Kocuria	Kocuria flava
UP000003813	794903	6011	Opitutaceae bacterium TAV5	Bacteria	Verrucomicrobia	Opitutae	Opitutales	Opitutaceae	NaV	Opitutaceae bacterium TAV5
UP000018559	1392007	2019	Lactobacillus equi DPC 6820	Bacteria	Firmicutes	Bacilli	Lactobacillales	Lactobacillaceae	Lactobacillus	Lactobacillus equi
UP000199182	258515	2758	Acetanaerobacterium elongatum	Bacteria	Firmicutes	Clostridia	Clostridiales	Ruminococcaceae	Acetanaerobacterium	Acetanaerobacterium elongatum
UP000249663	29443	5149	Paucimonas lemoignei (Pseudomonas lemoignei)	Bacteria	Proteobacteria	Betaproteobacteria	Burkholderiales	Burkholderiaceae	Paucimonas	Paucimonas lemoignei
UP000000494	717785	4889	Hyphomicrobium sp. (strain MC1)	Bacteria	Proteobacteria	Alphaproteobacteria	Rhizobiales	Hyphomicrobiaceae	Hyphomicrobium	Hyphomicrobium sp. MC1
UP000243524	2018042	2899	Halalkalibacillus sediminis	Bacteria	Firmicutes	Bacilli	Bacillales	Bacillaceae	Halalkalibacillus	Halalkalibacillus sediminis
UP000244686	2056841	5253	Pelomonas sp. HMWF004	Bacteria	Proteobacteria	Betaproteobacteria	Burkholderiales	Comamonadaceae	Pelomonas	Pelomonas sp. HMWF004
UP000020681	1299332	9033	Mycobacterium ulcerans str. Harvey	Bacteria	Actinobacteria	Actinobacteria	Corynebacteriales	Mycobacteriaceae	Mycobacterium	Mycobacterium ulcerans
UP000195433	1572656	1921	Ruminococcaceae bacterium CPB6	Bacteria	Firmicutes	Clostridia	Clostridiales	Ruminococcaceae	NaV	Ruminococcaceae bacterium CPB6
UP000014204	1235794	2435	Enterorhabdus caecimuris B7	Bacteria	Actinobacteria	Coriobacteriia	Eggerthellales	Eggerthellaceae	Enterorhabdus	Enterorhabdus caecimuris
UP000036756	1121307	2621	Clostridium cylindrosporum DSM 605	Bacteria	Firmicutes	Clostridia	Clostridiales	Clostridiaceae	Clostridium	Clostridium cylindrosporum
UP000016567	1219077	4147	Vibrio azureus NBRC 104587	Bacteria	Proteobacteria	Gammaproteobacteria	Vibrionales	Vibrionaceae	Vibrio	Vibrio azureus
UP000199452	1640674	3616	Williamwhitmania taraxaci	Bacteria	Bacteroidetes	Bacteroidia	Bacteroidales	Williamwhitmaniaceae	Williamwhitmania	Williamwhitmania taraxaci
UP000000248	246195	1273	Dichelobacter nodosus (strain VCS1703A)	Bacteria	Proteobacteria	Gammaproteobacteria	Cardiobacteriales	Cardiobacteriaceae	Dichelobacter	Dichelobacter nodosus
UP000320857	2213162	5331	Streptomyces sp. OF1	Bacteria	Actinobacteria	Actinobacteria	Streptomycetales	Streptomycetaceae	Streptomyces	Streptomyces sp. OF1
UP000250079	1192854	6680	Granulosicoccus antarcticus IMCC3135	Bacteria	Proteobacteria	Gammaproteobacteria	Chromatiales	Granulosicoccaceae	Granulosicoccus	Granulosicoccus antarcticus
UP000247341	1923971	3709	Salinibacter sp. 10B	Bacteria	Bacteroidetes	NaV	Bacteroidetes Order II. Incertae sedis	Rhodothermaceae	Salinibacter	Salinibacter sp. 10B
UP000008290	983548	2978	Dokdonia sp. (strain 4H-3-7-5) (Krokinobacter sp. (strain 4H-3-7-5))	Bacteria	Bacteroidetes	Flavobacteriia	Flavobacteriales	Flavobacteriaceae	Dokdonia	Dokdonia sp. 4H-3-7-5
UP000270530	2010829	2599	Rhodanobacteraceae bacterium Dysh456	Bacteria	Proteobacteria	Gammaproteobacteria	Xanthomonadales	Rhodanobacteraceae	Aerosticca	Aerosticca soli
UP000293852	228973	3500	Xylanibacterium ulmi	Bacteria	Actinobacteria	Actinobacteria	Micrococcales	Promicromonosporaceae	Xylanibacterium	Xylanibacterium ulmi
UP000280696	2320100	4335	bacterium 0.1xD8-82	Bacteria	NaV	NaV	NaV	NaV	NaV	bacterium 0.1xD8-82
UP000000374	391735	4911	Verminephrobacter eiseniae (strain EF01-2)	Bacteria	Proteobacteria	Betaproteobacteria	Burkholderiales	Comamonadaceae	Verminephrobacter	Verminephrobacter eiseniae
UP000069933	1561023	2675	Curtobacterium sp. MR_MD2014	Bacteria	Actinobacteria	Actinobacteria	Micrococcales	Microbacteriaceae	Curtobacterium	Curtobacterium sp. MR_MD2014
UP000017119	1403316	580	Mycoplasma parvum str. Indiana	Bacteria	Tenericutes	Mollicutes	Mycoplasmatales	Mycoplasmataceae	Mycoplasma	Mycoplasma parvum
UP000094714	1613	1789	Lactobacillus fermentum	Bacteria	Firmicutes	Bacilli	Lactobacillales	Lactobacillaceae	Lactobacillus	Lactobacillus fermentum
UP000261284	2291815	4790	Deminuibacter soli	Bacteria	Bacteroidetes	Chitinophagia	Chitinophagales	Chitinophagaceae	Deminuibacter	Deminuibacter soli
UP000266320	2292307	3528	Clostridium sp. AM58-1XD	Bacteria	Firmicutes	Clostridia	Clostridiales	Clostridiaceae	Clostridium	Clostridium sp. AM58-1XD
UP000268059	2487118	2890	Intestinibaculum porci	Bacteria	Firmicutes	Erysipelotrichia	Erysipelotrichales	Erysipelotrichaceae	Intestinibaculum	Intestinibaculum porci
UP000315271	935283	3050	Luteimonas sp. J16	Bacteria	Proteobacteria	Gammaproteobacteria	Xanthomonadales	Xanthomonadaceae	Luteimonas	Luteimonas sp. J16
UP000008929	502558	2674	Eggerthella sp. (strain YY7918)	Bacteria	Actinobacteria	Coriobacteriia	Eggerthellales	Eggerthellaceae	Eggerthella	Eggerthella sp. YY7918
UP000221168	1982044	4686	Zhengella mangrovi	Bacteria	Proteobacteria	Alphaproteobacteria	Rhizobiales	Phyllobacteriaceae	Zhengella	Zhengella mangrovi
UP000031201	1002340	4159	Leisingera sp. ANG1	Bacteria	Proteobacteria	Alphaproteobacteria	Rhodobacterales	Rhodobacteraceae	Leisingera	Leisingera sp. ANG1
UP000054172	1702214	1579	Candidatus [Bacteroides] periocalifornicus	Bacteria	Bacteroidetes	NaV	NaV	NaV	NaV	Candidatus [Bacteroides] periocalifornicus
UP000003056	443342	670	candidate division TM7 genomosp. GTL1	Bacteria	Candidatus Saccharibacteria	NaV	NaV	NaV	NaV	candidate division TM7 genomosp. GTL1
UP000198546	675864	4049	Auraticoccus monumenti	Bacteria	Actinobacteria	Actinobacteria	Propionibacteriales	Propionibacteriaceae	Auraticoccus	Auraticoccus monumenti
UP000294960	2512134	6028	Paenibacillus sp. BK673	Bacteria	Firmicutes	Bacilli	Bacillales	Paenibacillaceae	Paenibacillus	Paenibacillus sp. BK673
UP000006786	391937	4196	Nitratireductor pacificus pht-3B	Bacteria	Proteobacteria	Alphaproteobacteria	Rhizobiales	Phyllobacteriaceae	Nitratireductor	Nitratireductor pacificus
UP000092884	222136	1458	Helicobacter sp. MIT 01-6242	Bacteria	Proteobacteria	Epsilonproteobacteria	Campylobacterales	Helicobacteraceae	Helicobacter	Helicobacter sp. MIT 01-6242
UP000216004	686666	1438	Bombiscardovia coagulans	Bacteria	Actinobacteria	Actinobacteria	Bifidobacteriales	Bifidobacteriaceae	Bombiscardovia	Bombiscardovia coagulans
UP000253318	1931232	5230	Marinitenerispora sediminis	Bacteria	Actinobacteria	Actinobacteria	Streptosporangiales	Nocardiopsaceae	Marinitenerispora	Marinitenerispora sediminis
UP000268084	1902245	2873	Nakamurella sp. s14-144	Bacteria	Actinobacteria	Actinobacteria	Nakamurellales	Nakamurellaceae	Nakamurella	Nakamurella sp. s14-144
UP000303242	2571030	4435	Pontibacter sp. SGAir0037	Bacteria	Bacteroidetes	Cytophagia	Cytophagales	Hymenobacteraceae	Pontibacter	Pontibacter sp. SGAir0037
UP000283087	2490544	3573	Amphritea sp. MCCC 1K03512	Bacteria	Proteobacteria	Gammaproteobacteria	Oceanospirillales	Oceanospirillaceae	Amphritea	Amphritea sp. MCCC 1K03512
UP000031977	50718	3541	Vibrio mytili	Bacteria	Proteobacteria	Gammaproteobacteria	Vibrionales	Vibrionaceae	Vibrio	Vibrio mytili
UP000279120	2320088	4659	Roseburia sp. 1XD42-69	Bacteria	Firmicutes	Clostridia	Clostridiales	Lachnospiraceae	Roseburia	Roseburia sp. 1XD42-69
UP000036794	1628856	2909	bacteria symbiont BFo2 of Frankliniella occidentalis	Bacteria	Proteobacteria	Gammaproteobacteria	Enterobacterales	NaV	NaV	bacteria symbiont BFo2 of Frankliniella occidentalis
UP000199556	195064	2413	Ectothiorhodospira mobilis	Bacteria	Proteobacteria	Gammaproteobacteria	Chromatiales	Ectothiorhodospiraceae	Ectothiorhodospira	Ectothiorhodospira mobilis
UP000319745	713053	797	TM7 phylum sp. oral taxon 351	Bacteria	Candidatus Saccharibacteria	NaV	NaV	NaV	NaV	TM7 phylum sp. oral taxon 351
UP000216392	2015566	5338	Burkholderiales bacterium PBB4	Bacteria	Proteobacteria	Betaproteobacteria	Burkholderiales	NaV	NaV	Burkholderiales bacterium PBB4
UP000199302	871652	3242	Poseidonocella sedimentorum	Bacteria	Proteobacteria	Alphaproteobacteria	Rhodobacterales	Rhodobacteraceae	Poseidonocella	Poseidonocella sedimentorum
UP000017536	1321814	1479	Eubacterium brachy ATCC 33089	Bacteria	Firmicutes	Clostridia	Clostridiales	Clostridiales Family XIII. Incertae Sedis	NaV	[Eubacterium] brachy
UP000014090	1235792	5263	Lachnospiraceae bacterium M18-1	Bacteria	Firmicutes	Clostridia	Clostridiales	Lachnospiraceae	NaV	Lachnospiraceae bacterium M18-1
UP000185847	1799653	1256	Planctomycetaceae bacterium SCGC AG-212-D15	Bacteria	Planctomycetes	Planctomycetia	Planctomycetales	Planctomycetaceae	NaV	Planctomycetaceae bacterium SCGC AG-212-D15
UP000221394	442709	2501	Sanguibacter soli	Bacteria	Actinobacteria	Actinobacteria	Micrococcales	Sanguibacteraceae	Sanguibacter	Sanguibacter soli
UP000198379	1627892	4883	Dokdonia pacifica	Bacteria	Bacteroidetes	Flavobacteriia	Flavobacteriales	Flavobacteriaceae	Dokdonia	Dokdonia pacifica
UP000237056	1121886	2701	Flavobacterium croceum DSM 17960	Bacteria	Bacteroidetes	Flavobacteriia	Flavobacteriales	Flavobacteriaceae	Flavobacterium	Flavobacterium croceum
UP000007102	868864	1496	Desulfurobacterium thermolithotrophum (strain DSM 11699 / BSA)	Bacteria	Aquificae	Aquificae	Desulfurobacteriales	Desulfurobacteriaceae	Desulfurobacterium	Desulfurobacterium thermolithotrophum
UP000007383	889378	2766	Spirochaeta africana (strain ATCC 700263 / DSM 8902 / Z-7692)	Bacteria	Spirochaetes	Spirochaetia	Spirochaetales	Spirochaetaceae	Spirochaeta	Spirochaeta africana
UP000078317	1342299	3982	Sulfitobacter geojensis	Bacteria	Proteobacteria	Alphaproteobacteria	Rhodobacterales	Rhodobacteraceae	Sulfitobacter	Sulfitobacter geojensis
UP000295510	360241	2634	Tepidicella xavieri	Bacteria	Proteobacteria	Betaproteobacteria	Burkholderiales	NaV	Tepidicella	Tepidicella xavieri
UP000198833	89093	1874	Ignavigranum ruoffiae	Bacteria	Firmicutes	Bacilli	Lactobacillales	Aerococcaceae	Ignavigranum	Ignavigranum ruoffiae
UP000234335	54007	1795	Anaerococcus octavius	Bacteria	Firmicutes	Tissierellia	Tissierellales	Peptoniphilaceae	Anaerococcus	Anaerococcus octavius
UP000321933	1852021	3815	Parahaliea aestuarii	Bacteria	Proteobacteria	Gammaproteobacteria	Cellvibrionales	Halieaceae	Parahaliea	Parahaliea aestuarii
UP000014112	397287	3953	Lachnospiraceae bacterium 28-4	Bacteria	Firmicutes	Clostridia	Clostridiales	Lachnospiraceae	NaV	Lachnospiraceae bacterium 28-4
UP000017834	1399146	3989	Enterobacter cloacae S611	Bacteria	Proteobacteria	Gammaproteobacteria	Enterobacterales	Enterobacteriaceae	Enterobacter	Enterobacter cloacae
UP000256388	913107	3066	Pelolinea submarina	Bacteria	Chloroflexi	Anaerolineae	Anaerolineales	Anaerolineaceae	Pelolinea	Pelolinea submarina
UP000245673	563922	5334	Streptomyces sp. ICBB 8177	Bacteria	Actinobacteria	Actinobacteria	Streptomycetales	Streptomycetaceae	Streptomyces	Streptomyces sp. ICBB 8177
UP000190328	263852	2569	Pilibacter termitis	Bacteria	Firmicutes	Bacilli	Lactobacillales	Enterococcaceae	Pilibacter	Pilibacter termitis
UP000236014	2070341	1976	Bacillus sp. UFRGS-B20	Bacteria	Firmicutes	Bacilli	Bacillales	Bacillaceae	Bacillus	Bacillus sp. UFRGS-B20
UP000179907	657387	3055	Kushneria sp. YCWA18	Bacteria	Proteobacteria	Gammaproteobacteria	Oceanospirillales	Halomonadaceae	Kushneria	Kushneria sp. YCWA18
UP000013167	1193181	3089	Tetrasphaera elongata Lp2	Bacteria	Actinobacteria	Actinobacteria	Micrococcales	Intrasporangiaceae	Tetrasphaera	Tetrasphaera elongata
UP000215185	400065	2137	Streptococcus merionis	Bacteria	Firmicutes	Bacilli	Lactobacillales	Streptococcaceae	Streptococcus	Streptococcus merionis
UP000294558	467091	4258	Ilumatobacter fluminis	Bacteria	Actinobacteria	Acidimicrobiia	Acidimicrobiales	Ilumatobacteraceae	Ilumatobacter	Ilumatobacter fluminis
UP000295341	381431	4772	Panacagrimonas perspica	Bacteria	Proteobacteria	Gammaproteobacteria	Nevskiales	Sinobacteraceae	Panacagrimonas	Panacagrimonas perspica
UP000199398	455193	7655	Saccharopolyspora antimicrobica	Bacteria	Actinobacteria	Actinobacteria	Pseudonocardiales	Pseudonocardiaceae	Saccharopolyspora	Saccharopolyspora antimicrobica
UP000060487	1748249	3334	Nitrospirae bacterium HCH-1	Bacteria	Nitrospirae	NaV	NaV	NaV	NaV	Nitrospirae bacterium HCH-1
UP000307244	2571272	3967	Pedobacter sp. RP-3-15	Bacteria	Bacteroidetes	Sphingobacteriia	Sphingobacteriales	Sphingobacteriaceae	Pedobacter	Pedobacter sp. RP-3-15
UP000176087	933944	5131	Streptomyces abyssalis	Bacteria	Actinobacteria	Actinobacteria	Streptomycetales	Streptomycetaceae	Streptomyces	Streptomyces abyssalis
UP000036225	1612	2217	Lactobacillus farciminis	Bacteria	Firmicutes	Bacilli	Lactobacillales	Lactobacillaceae	Lactobacillus	Lactobacillus farciminis
UP000006377	402881	3580	Parvibaculum lavamentivorans (strain DS-1 / DSM 13023 / NCIMB 13966)	Bacteria	Proteobacteria	Alphaproteobacteria	Rhizobiales	Rhodobiaceae	Parvibaculum	Parvibaculum lavamentivorans
UP000018026	1263036	1913	Alistipes putredinis CAG:67	Bacteria	Bacteroidetes	Bacteroidia	Bacteroidales	Rikenellaceae	Alistipes	Alistipes putredinis CAG:67
UP000018022	1262802	2623	Clostridium sp. CAG:411	Bacteria	Firmicutes	Clostridia	Clostridiales	Clostridiaceae	Clostridium	Clostridium sp. CAG:411
UP000025229	42256	3148	Rubrobacter radiotolerans	Bacteria	Actinobacteria	Rubrobacteria	Rubrobacterales	Rubrobacteraceae	Rubrobacter	Rubrobacter radiotolerans
UP000281813	1435466	3792	Oceanobacillus bengalensis	Bacteria	Firmicutes	Bacilli	Bacillales	Bacillaceae	Oceanobacillus	Oceanobacillus bengalensis
UP000006457	1095749	2177	Pasteurella bettyae CCUG 2042	Bacteria	Proteobacteria	Gammaproteobacteria	Pasteurellales	Pasteurellaceae	Pasteurella	Pasteurella bettyae
UP000186602	1261634	3105	Roseburia sp. 499	Bacteria	Firmicutes	Clostridia	Clostridiales	Lachnospiraceae	Roseburia	Roseburia sp. 499
UP000181897	1917485	4362	Sulfitobacter sp. AM1-D1	Bacteria	Proteobacteria	Alphaproteobacteria	Rhodobacterales	Rhodobacteraceae	Sulfitobacter	Sulfitobacter sp. AM1-D1
UP000035366	665007	7420	Streptomyces incarnatus	Bacteria	Actinobacteria	Actinobacteria	Streptomycetales	Streptomycetaceae	Streptomyces	Streptomyces incarnatus
UP000192342	1317117	3284	Oceanococcus atlanticus	Bacteria	Proteobacteria	Gammaproteobacteria	Chromatiales	Ectothiorhodospiraceae	Oceanococcus	Oceanococcus atlanticus
UP000005481	861450	2148	Anaeroglobus geminatus F0357	Bacteria	Firmicutes	Negativicutes	Veillonellales	Veillonellaceae	Anaeroglobus	Anaeroglobus geminatus
UP000249065	2230885	5221	Acetobacteraceae bacterium DB1506	Bacteria	Proteobacteria	Alphaproteobacteria	Rhodospirillales	Acetobacteraceae	NaV	Acetobacteraceae bacterium DB1506
UP000018082	1262961	2054	Ruminococcus sp. CAG:563	Bacteria	Firmicutes	Clostridia	Clostridiales	Ruminococcaceae	Ruminococcus	Ruminococcus sp. CAG:563
UP000002213	446462	6912	Actinosynnema mirum (strain ATCC 29888 / DSM 43827 / NBRC 14064 / IMRU 3971)	Bacteria	Actinobacteria	Actinobacteria	Pseudonocardiales	Pseudonocardiaceae	Actinosynnema	Actinosynnema mirum
UP000000366	420662	4359	Methylibium petroleiphilum (strain ATCC BAA-1232 / LMG 22953 / PM1)	Bacteria	Proteobacteria	Betaproteobacteria	Burkholderiales	NaV	Methylibium	Methylibium petroleiphilum
UP000019849	69279	4454	Aquamicrobium defluvii	Bacteria	Proteobacteria	Alphaproteobacteria	Rhizobiales	Phyllobacteriaceae	Aquamicrobium	Aquamicrobium defluvii
UP000185478	1431546	2002	Corynebacterium aquilae DSM 44791	Bacteria	Actinobacteria	Actinobacteria	Corynebacteriales	Corynebacteriaceae	Corynebacterium	Corynebacterium aquilae
UP000002714	326298	2084	Sulfurimonas denitrificans (strain ATCC 33889 / DSM 1251) (Thiomicrospira denitrificans (strain ATCC 33889 / DSM 1251))	Bacteria	Proteobacteria	Epsilonproteobacteria	Campylobacterales	Helicobacteraceae	Sulfurimonas	Sulfurimonas denitrificans
UP000182264	29542	2796	Pelobacter acetylenicus	Bacteria	Proteobacteria	Deltaproteobacteria	Desulfuromonadales	Desulfuromonadaceae	Pelobacter	Pelobacter acetylenicus
UP000018280	1262907	1407	Mycoplasma sp. CAG:877	Bacteria	Tenericutes	Mollicutes	Mycoplasmatales	Mycoplasmataceae	Mycoplasma	Mycoplasma sp. CAG:877
UP000243535	375574	2697	Gulbenkiania indica	Bacteria	Proteobacteria	Betaproteobacteria	Neisseriales	Chromobacteriaceae	Gulbenkiania	Gulbenkiania indica
UP000236197	2070686	2260	Enteroscipio rubneri	Bacteria	Actinobacteria	Coriobacteriia	Eggerthellales	Eggerthellaceae	Enteroscipio	Enteroscipio rubneri
UP000057144	1712675	2191	Turicibacter sp. H121	Bacteria	Firmicutes	Erysipelotrichia	Erysipelotrichales	Erysipelotrichaceae	Turicibacter	Turicibacter sp. H121
UP000175621	1881858	2886	Nesterenkonia sp. PF2B19	Bacteria	Actinobacteria	Actinobacteria	Micrococcales	Micrococcaceae	Nesterenkonia	Nesterenkonia sp. PF2B19
UP000051348	1736436	4397	Afipia sp. Root123D2	Bacteria	Proteobacteria	Alphaproteobacteria	Rhizobiales	Bradyrhizobiaceae	Afipia	Afipia sp. Root123D2
UP000185434	1437875	1801	Corynebacterium frankenforstense DSM 45800	Bacteria	Actinobacteria	Actinobacteria	Corynebacteriales	Corynebacteriaceae	Corynebacterium	Corynebacterium frankenforstense
UP000195591	302980	7078	Paenibacillus sp. MY03	Bacteria	Firmicutes	Bacilli	Bacillales	Paenibacillaceae	Paenibacillus	Paenibacillus sp. MY03
UP000215002	1234841	4924	Mucilaginibacter xinganensis	Bacteria	Bacteroidetes	Sphingobacteriia	Sphingobacteriales	Sphingobacteriaceae	Mucilaginibacter	Mucilaginibacter xinganensis
UP000029998	1385517	2570	Lysobacter daejeonensis GH1-9	Bacteria	Proteobacteria	Gammaproteobacteria	Xanthomonadales	Xanthomonadaceae	Lysobacter	Lysobacter daejeonensis
UP000007032	537970	1535	Helicobacter canadensis MIT 98-5491	Bacteria	Proteobacteria	Epsilonproteobacteria	Campylobacterales	Helicobacteraceae	Helicobacter	Helicobacter canadensis
UP000198346	1519374	2934	Amphiplicatus metriothermophilus	Bacteria	Proteobacteria	Alphaproteobacteria	Parvularculales	Parvularculaceae	Amphiplicatus	Amphiplicatus metriothermophilus
UP000009073	595494	3126	Tolumonas auensis (strain DSM 9187 / TA4)	Bacteria	Proteobacteria	Gammaproteobacteria	Aeromonadales	Aeromonadaceae	Tolumonas	Tolumonas auensis
UP000271272	131109	2433	Actinomyces bowdenii	Bacteria	Actinobacteria	Actinobacteria	Actinomycetales	Actinomycetaceae	Actinomyces	Actinomyces bowdenii
UP000320390	2528018	5628	Planctomycetes bacterium Poly30	Bacteria	Planctomycetes	NaV	NaV	NaV	NaV	Planctomycetes bacterium Poly30
UP000000684	318167	3990	Shewanella frigidimarina (strain NCIMB 400)	Bacteria	Proteobacteria	Gammaproteobacteria	Alteromonadales	Shewanellaceae	Shewanella	Shewanella frigidimarina
UP000032749	698738	3895	Oleispira antarctica RB-8	Bacteria	Proteobacteria	Gammaproteobacteria	Oceanospirillales	Oceanospirillaceae	Oleispira	Oleispira antarctica
UP000288178	2499835	4847	Rubrivivax albus	Bacteria	Proteobacteria	Betaproteobacteria	Burkholderiales	NaV	Rubrivivax	Rubrivivax albus
UP000192536	1646377	4260	Rouxiella badensis	Bacteria	Proteobacteria	Gammaproteobacteria	Enterobacterales	Yersiniaceae	Rouxiella	Rouxiella badensis
UP000249642	2044938	1229	candidate division SR1 bacterium	Bacteria	NaV	NaV	NaV	NaV	NaV	candidate division SR1 bacterium
UP000002786	868129	2064	Prevotella bivia DSM 20514	Bacteria	Bacteroidetes	Bacteroidia	Bacteroidales	Prevotellaceae	Prevotella	Prevotella bivia
UP000054363	435908	2100	Idiomarina salinarum	Bacteria	Proteobacteria	Gammaproteobacteria	Alteromonadales	Idiomarinaceae	Idiomarina	Idiomarina salinarum
UP000265865	2292273	3402	Lachnospiraceae bacterium OF09-33XD	Bacteria	Firmicutes	Clostridia	Clostridiales	Lachnospiraceae	NaV	Lachnospiraceae bacterium OF09-33XD
UP000037046	74031	3684	Roseovarius tolerans	Bacteria	Proteobacteria	Alphaproteobacteria	Rhodobacterales	Rhodobacteraceae	Roseovarius	Roseovarius tolerans
UP000317181	1872122	5416	Acidovorax sp.	Bacteria	Proteobacteria	Betaproteobacteria	Burkholderiales	Comamonadaceae	Acidovorax	Acidovorax sp.
UP000240042	34097	1441	Brevinema andersonii	Bacteria	Spirochaetes	Spirochaetia	Brevinematales	Brevinemataceae	Brevinema	Brevinema andersonii
UP000028302	1304275	3807	Salinisphaera hydrothermalis (strain C41B8)	Bacteria	Proteobacteria	Gammaproteobacteria	Salinisphaerales	Salinisphaeraceae	Salinisphaera	Salinisphaera hydrothermalis
UP000293347	2530453	4198	Pedobacter sp. RP-1-14	Bacteria	Bacteroidetes	Sphingobacteriia	Sphingobacteriales	Sphingobacteriaceae	Pedobacter	Pedobacter sp. RP-1-14
UP000199771	1076937	2498	Fontimonas thermophila	Bacteria	Proteobacteria	Gammaproteobacteria	Nevskiales	Sinobacteraceae	Fontimonas	Fontimonas thermophila
UP000186132	1206085	4181	Jatrophihabitans endophyticus	Bacteria	Actinobacteria	Actinobacteria	Frankiales	Frankiaceae	Jatrophihabitans	Jatrophihabitans endophyticus
UP000070591	1384076	2623	Corynebacterium sp. DNF00584	Bacteria	Actinobacteria	Actinobacteria	Corynebacteriales	Corynebacteriaceae	Corynebacterium	Corynebacterium sp. DNF00584
UP000066549	1623450	1317	Methylophilales bacterium MBRS-H7	Bacteria	Proteobacteria	Betaproteobacteria	Nitrosomonadales	NaV	NaV	Methylophilales bacterium MBRS-H7
UP000193224	475083	4594	Roseovarius aestuarii	Bacteria	Proteobacteria	Alphaproteobacteria	Rhodobacterales	Rhodobacteraceae	Roseovarius	Roseovarius aestuarii
UP000185790	1517881	2595	Cellulosimicrobium sp. CUA-896	Bacteria	Actinobacteria	Actinobacteria	Micrococcales	Promicromonosporaceae	Cellulosimicrobium	Cellulosimicrobium sp. CUA-896
UP000190626	1469647	7849	Paenibacillus ferrarius	Bacteria	Firmicutes	Bacilli	Bacillales	Paenibacillaceae	Paenibacillus	Paenibacillus ferrarius
UP000249522	1803190	4979	Paenibacillus sp. SMB1	Bacteria	Firmicutes	Bacilli	Bacillales	Paenibacillaceae	Paenibacillus	Paenibacillus sp. SMB1
UP000199552	1336796	3141	Gillisia sp. Hel1_33_143	Bacteria	Bacteroidetes	Flavobacteriia	Flavobacteriales	Flavobacteriaceae	Gillisia	Gillisia sp. Hel1_33_143
UP000016721	1294142	4340	Clostridium intestinale URNW	Bacteria	Firmicutes	Clostridia	Clostridiales	Clostridiaceae	Clostridium	Clostridium intestinale
UP000249922	1499308	2325	Paracoccus mutanolyticus	Bacteria	Proteobacteria	Alphaproteobacteria	Rhodobacterales	Rhodobacteraceae	Paracoccus	Paracoccus mutanolyticus
UP000003947	864069	6918	Microvirga lotononidis	Bacteria	Proteobacteria	Alphaproteobacteria	Rhizobiales	Methylobacteriaceae	Microvirga	Microvirga lotononidis
UP000034283	444103	6367	Streptomyces sp. CNQ-509	Bacteria	Actinobacteria	Actinobacteria	Streptomycetales	Streptomycetaceae	Streptomyces	Streptomyces sp. CNQ-509
UP000076077	252514	3126	Microbulbifer thermotolerans	Bacteria	Proteobacteria	Gammaproteobacteria	Cellvibrionales	Microbulbiferaceae	Microbulbifer	Microbulbifer thermotolerans
UP000198307	184748	3981	Paracoccus seriniphilus	Bacteria	Proteobacteria	Alphaproteobacteria	Rhodobacterales	Rhodobacteraceae	Paracoccus	Paracoccus seriniphilus
UP000248259	1121029	4610	Azoarcus communis SWub3 = DSM 12120	Bacteria	Proteobacteria	Betaproteobacteria	Rhodocyclales	Zoogloeaceae	Azoarcus	Azoarcus communis
UP000185789	1137096	8121	Calothrix sp. HK-06	Bacteria	Cyanobacteria	NaV	Nostocales	Calotrichaceae	Calothrix	Calothrix sp. HK-06
UP000219285	1858656	3854	Alteromonas pelagimontana	Bacteria	Proteobacteria	Gammaproteobacteria	Alteromonadales	Alteromonadaceae	Alteromonas	Alteromonas pelagimontana
UP000295135	1914471	2668	Sulfuritortus calidifontis	Bacteria	Proteobacteria	Betaproteobacteria	Nitrosomonadales	Thiobacillaceae	Sulfuritortus	Sulfuritortus calidifontis
UP000063229	46677	4626	Pseudomonas agarici	Bacteria	Proteobacteria	Gammaproteobacteria	Pseudomonadales	Pseudomonadaceae	Pseudomonas	Pseudomonas agarici
UP000020077	1454002	4449	Candidatus Accumulibacter sp. BA-91	Bacteria	Proteobacteria	Betaproteobacteria	NaV	NaV	Candidatus Accumulibacter	Candidatus Accumulibacter sp. BA-91
UP000199412	69960	3690	Rhodospira trueperi	Bacteria	Proteobacteria	Alphaproteobacteria	Rhodospirillales	Rhodospirillaceae	Rhodospira	Rhodospira trueperi
UP000008632	743721	3068	Pseudoxanthomonas suwonensis (strain 11-1)	Bacteria	Proteobacteria	Gammaproteobacteria	Xanthomonadales	Xanthomonadaceae	Pseudoxanthomonas	Pseudoxanthomonas suwonensis
UP000003676	411464	3106	Desulfovibrio piger ATCC 29098	Bacteria	Proteobacteria	Deltaproteobacteria	Desulfovibrionales	Desulfovibrionaceae	Desulfovibrio	Desulfovibrio piger
UP000276503	2483458	1209	Candidatus Marinimicrobia bacterium PRS2	Bacteria	Candidatus Marinimicrobia	NaV	NaV	NaV	NaV	Candidatus Marinimicrobia bacterium PRS2
UP000011717	1234595	3056	Pacificimonas flava	Bacteria	Proteobacteria	Alphaproteobacteria	Sphingomonadales	Sphingomonadaceae	Pacificimonas	Pacificimonas flava
UP000295157	1848320	8278	Nonomuraea sp. KC201	Bacteria	Actinobacteria	Actinobacteria	Streptosporangiales	Streptosporangiaceae	Nonomuraea	Nonomuraea sp. KC201
UP000031320	1478174	2344	Neochlamydia sp. TUME1	Bacteria	Chlamydiae	Chlamydiia	Parachlamydiales	Parachlamydiaceae	Neochlamydia	Neochlamydia sp. TUME1
UP000199572	390241	4844	Pedobacter rhizosphaerae	Bacteria	Bacteroidetes	Sphingobacteriia	Sphingobacteriales	Sphingobacteriaceae	Pedobacter	Pedobacter rhizosphaerae
UP000298049	2259620	3673	Hydrocarboniclastica marina	Bacteria	Proteobacteria	Gammaproteobacteria	Alteromonadales	Alteromonadaceae	Hydrocarboniclastica	Hydrocarboniclastica marina
UP000249518	1353778	3053	Flavobacterium lacus	Bacteria	Bacteroidetes	Flavobacteriia	Flavobacteriales	Flavobacteriaceae	Flavobacterium	Flavobacterium lacus
UP000194922	1934309	5211	Alkalinema sp. CACIAM 70d	Bacteria	Cyanobacteria	NaV	Synechococcales	Leptolyngbyaceae	Alkalinema	Alkalinema sp. CACIAM 70d
UP000304912	2572577	3632	Salinimonas sp. KX18D6	Bacteria	Proteobacteria	Gammaproteobacteria	Alteromonadales	Alteromonadaceae	Salinimonas	Salinimonas sp. KX18D6
UP000051760	1736272	4544	Massilia sp. Leaf139	Bacteria	Proteobacteria	Betaproteobacteria	Burkholderiales	Oxalobacteraceae	Massilia	Massilia sp. Leaf139
UP000183249	1855339	2594	Nitrosovibrio sp. Nv17	Bacteria	Proteobacteria	Betaproteobacteria	Nitrosomonadales	Nitrosomonadaceae	Nitrosovibrio	Nitrosovibrio sp. Nv17
UP000187344	1686310	2111	Bartonella apis	Bacteria	Proteobacteria	Alphaproteobacteria	Rhizobiales	Bartonellaceae	Bartonella	Bartonella apis
UP000245212	2175229	3237	Corticimicrobacter populi	Bacteria	Proteobacteria	Betaproteobacteria	Burkholderiales	Alcaligenaceae	Corticimicrobacter	Corticimicrobacter populi
UP000236311	879566	5687	Acetatifactor muris	Bacteria	Firmicutes	Clostridia	Clostridiales	Lachnospiraceae	Acetatifactor	Acetatifactor muris
UP000215059	2021314	3939	Fictibacillus aquaticus	Bacteria	Firmicutes	Bacilli	Bacillales	Bacillaceae	Fictibacillus	Fictibacillus aquaticus
UP000254848	1487935	4233	Enterobacillus tribolii	Bacteria	Proteobacteria	Gammaproteobacteria	Enterobacterales	Enterobacteriaceae	Enterobacillus	Enterobacillus tribolii
UP000188820	1906744	1998	Rodentibacter heylii	Bacteria	Proteobacteria	Gammaproteobacteria	Pasteurellales	Pasteurellaceae	Rodentibacter	Rodentibacter heylii
UP000243784	535712	1327	Candidatus Rhodoluna planktonica	Bacteria	Actinobacteria	Actinobacteria	Micrococcales	Microbacteriaceae	Rhodoluna	Candidatus Rhodoluna planktonica
UP000316770	2527992	5436	Planctomycetes bacterium Mal33	Bacteria	Planctomycetes	NaV	NaV	NaV	NaV	Planctomycetes bacterium Mal33
UP000186379	1703924	7263	Streptomyces sp. CB02056	Bacteria	Actinobacteria	Actinobacteria	Streptomycetales	Streptomycetaceae	Streptomyces	Streptomyces sp. CB02056
UP000284202	1675788	4491	Paracoccus sp. 1011MAR3C25	Bacteria	Proteobacteria	Alphaproteobacteria	Rhodobacterales	Rhodobacteraceae	Paracoccus	Paracoccus sp. 1011MAR3C25
UP000092714	29363	3219	Clostridium paraputrificum	Bacteria	Firmicutes	Clostridia	Clostridiales	Clostridiaceae	Clostridium	Clostridium paraputrificum
UP000233742	1529068	3740	Paracoccus sp. BM15	Bacteria	Proteobacteria	Alphaproteobacteria	Rhodobacterales	Rhodobacteraceae	Paracoccus	Paracoccus sp. BM15
UP000194457	157779	3205	Kushneria marisflavi	Bacteria	Proteobacteria	Gammaproteobacteria	Oceanospirillales	Halomonadaceae	Kushneria	Kushneria marisflavi
UP000035268	1307763	2373	Kiritimatiella glycovorans	Bacteria	Kiritimatiellaeota	Kiritimatiellae	Kiritimatiellales	Kiritimatiellaceae	Kiritimatiella	Kiritimatiella glycovorans
UP000052979	145458	1904	Rathayibacter toxicus	Bacteria	Actinobacteria	Actinobacteria	Micrococcales	Microbacteriaceae	Rathayibacter	Rathayibacter toxicus
UP000245590	2182385	3043	Brachybacterium endophyticum	Bacteria	Actinobacteria	Actinobacteria	Micrococcales	Dermabacteraceae	Brachybacterium	Brachybacterium endophyticum
UP000185208	1889883	2967	Proteiniborus sp. DW1	Bacteria	Firmicutes	Clostridia	Clostridiales	NaV	Proteiniborus	Proteiniborus sp. DW1
UP000199515	589385	8491	Amycolatopsis xylanica	Bacteria	Actinobacteria	Actinobacteria	Pseudonocardiales	Pseudonocardiaceae	Amycolatopsis	Amycolatopsis xylanica
UP000179615	1882734	3468	Salinicola sp. MIT1003	Bacteria	Proteobacteria	Gammaproteobacteria	Oceanospirillales	Halomonadaceae	Salinicola	Salinicola sp. MIT1003
UP000008366	1184609	4422	Kineosphaera limosa NBRC 100340	Bacteria	Actinobacteria	Actinobacteria	Micrococcales	Dermatophilaceae	Kineosphaera	Kineosphaera limosa
UP000051771	1736544	6046	Bosea sp. Root483D1	Bacteria	Proteobacteria	Alphaproteobacteria	Rhizobiales	Bradyrhizobiaceae	Bosea	Bosea sp. Root483D1
UP000199318	1464123	2769	Salisediminibacterium haloalkalitolerans	Bacteria	Firmicutes	Bacilli	Bacillales	Bacillaceae	Salisediminibacterium	Salisediminibacterium haloalkalitolerans
UP000188235	399497	3222	Tessaracoccus flavescens	Bacteria	Actinobacteria	Actinobacteria	Propionibacteriales	Propionibacteriaceae	Tessaracoccus	Tessaracoccus flavescens
UP000018343	1262931	2159	Prevotella sp. CAG:592	Bacteria	Bacteroidetes	Bacteroidia	Bacteroidales	Prevotellaceae	Prevotella	Prevotella sp. CAG:592
UP000035963	908627	8182	Caballeronia mineralivorans PML1(12)	Bacteria	Proteobacteria	Betaproteobacteria	Burkholderiales	Burkholderiaceae	Caballeronia	Caballeronia mineralivorans
UP000295518	244584	783	Mycoplasma testudineum	Bacteria	Tenericutes	Mollicutes	Mycoplasmatales	Mycoplasmataceae	Mycoplasma	Mycoplasma testudineum
UP000292547	73044	5663	Streptomyces seoulensis	Bacteria	Actinobacteria	Actinobacteria	Streptomycetales	Streptomycetaceae	Streptomyces	Streptomyces seoulensis
UP000282084	2072	6519	Saccharothrix australiensis	Bacteria	Actinobacteria	Actinobacteria	Pseudonocardiales	Pseudonocardiaceae	Saccharothrix	Saccharothrix australiensis
UP000244754	2079535	2114	Corynebacterium sp. 2184	Bacteria	Actinobacteria	Actinobacteria	Corynebacteriales	Corynebacteriaceae	Corynebacterium	Corynebacterium sp. 2184
UP000306192	2056433	3658	Subtercola vilae	Bacteria	Actinobacteria	Actinobacteria	Micrococcales	Microbacteriaceae	Subtercola	Subtercola vilae
UP000188879	1817963	5405	Roseomonas deserti	Bacteria	Proteobacteria	Alphaproteobacteria	Rhodospirillales	Acetobacteraceae	Roseomonas	Roseomonas deserti
UP000001948	316056	4864	Rhodopseudomonas palustris (strain BisB18)	Bacteria	Proteobacteria	Alphaproteobacteria	Rhizobiales	Bradyrhizobiaceae	Rhodopseudomonas	Rhodopseudomonas palustris
UP000245021	2169526	1667	Lactococcus termiticola	Bacteria	Firmicutes	Bacilli	Lactobacillales	Streptococcaceae	Lactococcus	Lactococcus termiticola
UP000008460	590998	3760	Cellulomonas fimi (strain ATCC 484 / DSM 20113 / JCM 1341 / NBRC 15513 / NCIMB 8980 / NCTC 7547)	Bacteria	Actinobacteria	Actinobacteria	Micrococcales	Cellulomonadaceae	Cellulomonas	Cellulomonas fimi
UP000196146	1965572	2212	Pseudoflavonifractor sp. An176	Bacteria	Firmicutes	Clostridia	Clostridiales	Ruminococcaceae	Pseudoflavonifractor	Pseudoflavonifractor sp. An176
UP000198648	1299341	2554	Flavobacterium urocaniciphilum	Bacteria	Bacteroidetes	Flavobacteriia	Flavobacteriales	Flavobacteriaceae	Flavobacterium	Flavobacterium urocaniciphilum
UP000184128	1121025	1926	Atopostipes suicloacalis DSM 15692	Bacteria	Firmicutes	Bacilli	Lactobacillales	Carnobacteriaceae	Atopostipes	Atopostipes suicloacalis
UP000000557	251221	4406	Gloeobacter violaceus (strain ATCC 29082 / PCC 7421)	Bacteria	Cyanobacteria	Gloeobacteria	Gloeobacterales	Gloeobacteraceae	Gloeobacter	Gloeobacter violaceus
UP000093352	1871336	2051	Criibacterium bergeronii	Bacteria	Firmicutes	Clostridia	Clostridiales	Peptostreptococcaceae	Criibacterium	Criibacterium bergeronii
UP000037930	1523416	3685	Blastomonas sp. AAP25	Bacteria	Proteobacteria	Alphaproteobacteria	Sphingomonadales	Sphingomonadaceae	Blastomonas	Blastomonas sp. AAP25
UP000316154	239	3029	Flavobacterium sp.	Bacteria	Bacteroidetes	Flavobacteriia	Flavobacteriales	Flavobacteriaceae	Flavobacterium	Flavobacterium sp.
UP000051195	1736511	5611	Rhizobacter sp. Root29	Bacteria	Proteobacteria	Betaproteobacteria	Burkholderiales	NaV	Rhizobacter	Rhizobacter sp. Root29
UP000321764	2593301	2651	Reinekea sp. SSH23	Bacteria	Proteobacteria	Gammaproteobacteria	Oceanospirillales	Saccharospirillaceae	Reinekea	Reinekea sp. SSH23
UP000249890	414771	7234	Paenibacillus donghaensis	Bacteria	Firmicutes	Bacilli	Bacillales	Paenibacillaceae	Paenibacillus	Paenibacillus donghaensis
UP000324880	1948890	5345	Rhodobacterales bacterium	Bacteria	Proteobacteria	Alphaproteobacteria	Rhodobacterales	NaV	NaV	Rhodobacterales bacterium
UP000199228	1732	2618	Eubacterium oxidoreducens	Bacteria	Firmicutes	Clostridia	Clostridiales	Eubacteriaceae	Eubacterium	Eubacterium oxidoreducens
UP000009044	634177	3116	Komagataeibacter medellinensis (strain NBRC 3288 / BCRC 11682 / LMG 1693 / Kondo 51) (Gluconacetobacter medellinensis)	Bacteria	Proteobacteria	Alphaproteobacteria	Rhodospirillales	Acetobacteraceae	Komagataeibacter	Komagataeibacter medellinensis
UP000298656	2571746	7436	Burkholderia sp. DHOD12	Bacteria	Proteobacteria	Betaproteobacteria	Burkholderiales	Burkholderiaceae	Burkholderia	Burkholderia sp. DHOD12
UP000013963	1276229	1006	Spiroplasma syrphidicola EA-1	Bacteria	Tenericutes	Mollicutes	Entomoplasmatales	Spiroplasmataceae	Spiroplasma	Spiroplasma syrphidicola
UP000262538	2200763	6852	Microbispora triticiradicis	Bacteria	Actinobacteria	Actinobacteria	Streptosporangiales	Streptosporangiaceae	Microbispora	Microbispora triticiradicis
UP000009885	1229783	2323	Staphylococcus massiliensis S46	Bacteria	Firmicutes	Bacilli	Bacillales	Staphylococcaceae	Staphylococcus	Staphylococcus massiliensis
UP000192907	1513793	6344	Pseudobacteriovorax antillogorgiicola	Bacteria	Proteobacteria	Oligoflexia	Oligoflexales	Pseudobacteriovoracaceae	Pseudobacteriovorax	Pseudobacteriovorax antillogorgiicola
UP000239814	1004901	3450	Gordonia iterans	Bacteria	Actinobacteria	Actinobacteria	Corynebacteriales	Gordoniaceae	Gordonia	Gordonia iterans
UP000023785	1392540	2541	Acinetobacter nectaris CIP 110549	Bacteria	Proteobacteria	Gammaproteobacteria	Pseudomonadales	Moraxellaceae	Acinetobacter	Acinetobacter nectaris
UP000001732	309798	1481	Coprothermobacter proteolyticus (strain ATCC 35245 / DSM 5265 / BT)	Bacteria	Coprothermobacterota	Coprothermobacteria	Coprothermobacterales	Coprothermobacteraceae	Coprothermobacter	Coprothermobacter proteolyticus
UP000027734	1300350	3416	Sulfitobacter donghicola DSW-25 = KCTC 12864 = JCM 14565	Bacteria	Proteobacteria	Alphaproteobacteria	Rhodobacterales	Rhodobacteraceae	Sulfitobacter	Sulfitobacter donghicola
UP000237310	2080416	3153	Flavobacterium alvei	Bacteria	Bacteroidetes	Flavobacteriia	Flavobacteriales	Flavobacteriaceae	Flavobacterium	Flavobacterium alvei
UP000009383	655186	1283	uncultured SUP05 cluster bacterium	Bacteria	Proteobacteria	Gammaproteobacteria	NaV	NaV	Candidatus Thioglobus	uncultured SUP05 cluster bacterium
UP000195450	1932704	777	bacterium B17	Bacteria	NaV	NaV	NaV	NaV	NaV	bacterium B17
UP000284957	2293102	2067	Erysipelatoclostridium sp. AM42-17	Bacteria	Firmicutes	Erysipelotrichia	Erysipelotrichales	Erysipelotrichaceae	Erysipelatoclostridium	Erysipelatoclostridium sp. AM42-17
UP000295182	80881	3355	Simplicispira metamorpha	Bacteria	Proteobacteria	Betaproteobacteria	Burkholderiales	Comamonadaceae	Simplicispira	Simplicispira metamorpha
UP000195266	1932695	527	bacterium J17	Bacteria	NaV	NaV	NaV	NaV	NaV	bacterium J17
UP000215798	1671698	4827	Hydrocoleum sp. CS-953	Bacteria	Cyanobacteria	NaV	Oscillatoriales	Microcoleaceae	Hydrocoleum	Hydrocoleum sp. CS-953
UP000295668	2529274	3293	Pedobacter changchengzhani	Bacteria	Bacteroidetes	Sphingobacteriia	Sphingobacteriales	Sphingobacteriaceae	Pedobacter	Pedobacter changchengzhani
UP000032721	351671	3749	Xenorhabdus doucetiae	Bacteria	Proteobacteria	Gammaproteobacteria	Enterobacterales	Morganellaceae	Xenorhabdus	Xenorhabdus doucetiae
UP000291388	2512146	5816	Micromonospora sp. CNZ295	Bacteria	Actinobacteria	Actinobacteria	Micromonosporales	Micromonosporaceae	Micromonospora	Micromonospora sp. CNZ295
UP000198620	1233	2863	Nitrosovibrio tenuis	Bacteria	Proteobacteria	Betaproteobacteria	Nitrosomonadales	Nitrosomonadaceae	Nitrosovibrio	Nitrosovibrio tenuis
UP000031461	1122941	3311	Pedobacter glucosidilyticus	Bacteria	Bacteroidetes	Sphingobacteriia	Sphingobacteriales	Sphingobacteriaceae	Pedobacter	Pedobacter glucosidilyticus
UP000233753	2035246	7098	Plantactinospora sp. CNZ320	Bacteria	Actinobacteria	Actinobacteria	Micromonosporales	Micromonosporaceae	Plantactinospora	Plantactinospora sp. CNZ320
UP000216361	2022747	3712	Elstera cyanobacteriorum	Bacteria	Proteobacteria	Alphaproteobacteria	Rhodospirillales	Rhodospirillaceae	Elstera	Elstera cyanobacteriorum
UP000198565	334253	4278	Gracilibacillus orientalis	Bacteria	Firmicutes	Bacilli	Bacillales	Bacillaceae	Gracilibacillus	Gracilibacillus orientalis
UP000244223	1077255	3309	Agitococcus lubricus	Bacteria	Firmicutes	Bacilli	Lactobacillales	Carnobacteriaceae	Agitococcus	Agitococcus lubricus
UP000051971	1736362	3738	Cellulomonas sp. Leaf395	Bacteria	Actinobacteria	Actinobacteria	Micrococcales	Cellulomonadaceae	Cellulomonas	Cellulomonas sp. Leaf395
UP000076318	1632864	6497	Planctomyces sp. SH-PL14	Bacteria	Planctomycetes	Planctomycetia	Planctomycetales	Planctomycetaceae	Planctomyces	Planctomyces sp. SH-PL14
UP000063965	2054173	822	Candidatus Coxiella mudrowiae	Bacteria	Proteobacteria	Gammaproteobacteria	Legionellales	Coxiellaceae	Coxiella	Candidatus Coxiella mudrowiae
UP000217505	2021370	4775	Sphingobacteriaceae bacterium	Bacteria	Bacteroidetes	Sphingobacteriia	Sphingobacteriales	Sphingobacteriaceae	NaV	Sphingobacteriaceae bacterium
UP000310770	43143	2472	Tissierella creatinini	Bacteria	Firmicutes	Tissierellia	Tissierellales	Tissierellaceae	Tissierella	Tissierella creatinini
UP000263263	2292910	3142	Alistipes sp. AF14-19	Bacteria	Bacteroidetes	Bacteroidia	Bacteroidales	Rikenellaceae	Alistipes	Alistipes sp. AF14-19
UP000199277	1855370	1574	Leuconostocaceae bacterium R-53105	Bacteria	Firmicutes	Bacilli	Lactobacillales	Leuconostocaceae	NaV	Leuconostocaceae bacterium R-53105
UP000295325	1096341	2943	Fonticella tunisiensis	Bacteria	Firmicutes	Clostridia	Clostridiales	Clostridiaceae	Fonticella	Fonticella tunisiensis
UP000237426	2080747	7307	Streptomyces sp. Ru72	Bacteria	Actinobacteria	Actinobacteria	Streptomycetales	Streptomycetaceae	Streptomyces	Streptomyces sp. Ru72
UP000184447	1121316	4177	Clostridium grantii DSM 8605	Bacteria	Firmicutes	Clostridia	Clostridiales	Clostridiaceae	Clostridium	Clostridium grantii
UP000027084	1487582	2187	Peptococcaceae bacterium SCADC1_2_3	Bacteria	Firmicutes	Clostridia	Clostridiales	Peptococcaceae	NaV	Peptococcaceae bacterium SCADC1_2_3
UP000003637	947828	3249	Lactobacillus rhamnosus MTCC 5462	Bacteria	Firmicutes	Bacilli	Lactobacillales	Lactobacillaceae	Lactobacillus	Lactobacillus rhamnosus
UP000269883	241368	3428	Desulfovibrio ferrophilus	Bacteria	Proteobacteria	Deltaproteobacteria	Desulfovibrionales	Desulfovibrionaceae	Desulfovibrio	Desulfovibrio ferrophilus
UP000001508	589865	2595	Desulfurivibrio alkaliphilus (strain DSM 19089 / UNIQEM U267 / AHT2)	Bacteria	Proteobacteria	Deltaproteobacteria	Desulfobacterales	Desulfobulbaceae	Desulfurivibrio	Desulfurivibrio alkaliphilus
UP000198600	46679	5173	Pseudomonas mucidolens	Bacteria	Proteobacteria	Gammaproteobacteria	Pseudomonadales	Pseudomonadaceae	Pseudomonas	Pseudomonas mucidolens
UP000178622	1859473	2108	Floricoccus tropicus	Bacteria	Firmicutes	Bacilli	Lactobacillales	Streptococcaceae	Floricoccus	Floricoccus tropicus
UP000002677	83406	3683	gamma proteobacterium HdN1	Bacteria	Proteobacteria	Gammaproteobacteria	NaV	NaV	NaV	gamma proteobacterium HdN1
UP000295788	1281767	2415	Tepidibacillus fermentans	Bacteria	Firmicutes	Bacilli	Bacillales	Bacillaceae	Tepidibacillus	Tepidibacillus fermentans
UP000308707	2572684	3308	Luteimonas sp. H23	Bacteria	Proteobacteria	Gammaproteobacteria	Xanthomonadales	Xanthomonadaceae	Luteimonas	Luteimonas sp. H23
UP000292830	2044944	2778	Sphingobacteriales bacterium	Bacteria	Bacteroidetes	Sphingobacteriia	Sphingobacteriales	NaV	NaV	Sphingobacteriales bacterium
UP000321306	1223518	5844	Deinococcus cellulosilyticus NBRC 106333 = KACC 11606	Bacteria	Deinococcus-Thermus	Deinococci	Deinococcales	Deinococcaceae	Deinococcus	Deinococcus cellulosilyticus
UP000052012	1423781	1405	Lactobacillus ozensis DSM 23829 = JCM 17196	Bacteria	Firmicutes	Bacilli	Lactobacillales	Lactobacillaceae	Lactobacillus	Lactobacillus ozensis
UP000235124	2035344	3948	Amylibacter cionae	Bacteria	Proteobacteria	Alphaproteobacteria	Rhodobacterales	Rhodobacteraceae	Amylibacter	Amylibacter cionae
UP000198553	930146	4551	Bacillus persicus	Bacteria	Firmicutes	Bacilli	Bacillales	Bacillaceae	Bacillus	Bacillus persicus
UP000235455	2057026	1052	Enterobacter sp. EA-1	Bacteria	Proteobacteria	Gammaproteobacteria	Enterobacterales	Enterobacteriaceae	Enterobacter	Enterobacter sp. EA-1
UP000009154	1112204	5097	Gordonia polyisoprenivorans (strain DSM 44266 / VH2)	Bacteria	Actinobacteria	Actinobacteria	Corynebacteriales	Gordoniaceae	Gordonia	Gordonia polyisoprenivorans
UP000235918	712711	1968	Tannerella sp. oral taxon 808	Bacteria	Bacteroidetes	Bacteroidia	Bacteroidales	Tannerellaceae	Tannerella	Tannerella sp. oral taxon 808
UP000005336	1030841	2553	Neisseria wadsworthii 9715	Bacteria	Proteobacteria	Betaproteobacteria	Neisseriales	Neisseriaceae	Neisseria	Neisseria wadsworthii
UP000092967	1790137	2747	Wenyingzhuangia fucanilytica	Bacteria	Bacteroidetes	Flavobacteriia	Flavobacteriales	Flavobacteriaceae	Wenyingzhuangia	Wenyingzhuangia fucanilytica
UP000002770	658187	3959	Legionella drancourtii LLAP12	Bacteria	Proteobacteria	Gammaproteobacteria	Legionellales	Legionellaceae	Legionella	Legionella drancourtii
UP000077875	376489	3715	Halotalea alkalilenta	Bacteria	Proteobacteria	Gammaproteobacteria	Oceanospirillales	Halomonadaceae	Halotalea	Halotalea alkalilenta
UP000269097	2674991	4698	Cohnella candidum	Bacteria	Firmicutes	Bacilli	Bacillales	Paenibacillaceae	Cohnella	Cohnella candidum
UP000190539	83656	6478	Streptomyces tsukubensis	Bacteria	Actinobacteria	Actinobacteria	Streptomycetales	Streptomycetaceae	Streptomyces	Streptomyces tsukubensis
UP000245754	942865	5711	Cupriavidus plantarum	Bacteria	Proteobacteria	Betaproteobacteria	Burkholderiales	Burkholderiaceae	Cupriavidus	Cupriavidus plantarum
UP000285328	2292364	2572	Prevotella sp. AM34-19LB	Bacteria	Bacteroidetes	Bacteroidia	Bacteroidales	Prevotellaceae	Prevotella	Prevotella sp. AM34-19LB
UP000179465	1834515	7402	Frankia sp. EUN1h	Bacteria	Actinobacteria	Actinobacteria	Frankiales	Frankiaceae	Frankia	Frankia sp. EUN1h
UP000193450	716816	3870	Oceanicoccus sagamiensis	Bacteria	Proteobacteria	Gammaproteobacteria	Cellvibrionales	Spongiibacteraceae	Oceanicoccus	Oceanicoccus sagamiensis
UP000016487	1117314	4457	Pseudoalteromonas citrea DSM 8771	Bacteria	Proteobacteria	Gammaproteobacteria	Alteromonadales	Pseudoalteromonadaceae	Pseudoalteromonas	Pseudoalteromonas citrea
UP000053260	909626	8992	Streptomyces sp. RV15	Bacteria	Actinobacteria	Actinobacteria	Streptomycetales	Streptomycetaceae	Streptomyces	Streptomyces sp. RV15
UP000023067	396014	3605	Brachybacterium phenoliresistens	Bacteria	Actinobacteria	Actinobacteria	Micrococcales	Dermabacteraceae	Brachybacterium	Brachybacterium phenoliresistens
UP000255317	1703343	3022	Marinirhabdus gelatinilytica	Bacteria	Bacteroidetes	Flavobacteriia	Flavobacteriales	Flavobacteriaceae	Marinirhabdus	Marinirhabdus gelatinilytica
UP000243488	1931241	3645	Pseudomonas sp. S-6-2	Bacteria	Proteobacteria	Gammaproteobacteria	Pseudomonadales	Pseudomonadaceae	Pseudomonas	Pseudomonas sp. S-6-2
UP000051939	1736439	5063	Nocardioides sp. Root1257	Bacteria	Actinobacteria	Actinobacteria	Propionibacteriales	Nocardioidaceae	Nocardioides	Nocardioides sp. Root1257
UP000003959	489825	7382	Moorea producens 3L	Bacteria	Cyanobacteria	NaV	Oscillatoriales	Oscillatoriaceae	Moorea	Moorea producens
UP000293331	2492395	3723	Mucilaginibacter sp. 17JY9-4	Bacteria	Bacteroidetes	Sphingobacteriia	Sphingobacteriales	Sphingobacteriaceae	Mucilaginibacter	Mucilaginibacter terrigena
UP000236151	84032	3781	Pseudoclostridium thermosuccinogenes	Bacteria	Firmicutes	Clostridia	Clostridiales	Hungateiclostridiaceae	Pseudoclostridium	Pseudoclostridium thermosuccinogenes
UP000010482	13035	3305	Dactylococcopsis salina PCC 8305	Bacteria	Cyanobacteria	NaV	Synechococcales	Synechococcaceae	Dactylococcopsis	Dactylococcopsis salina
UP000070354	674703	7007	Rhodoplanes sp. Z2-YC6860	Bacteria	Proteobacteria	Alphaproteobacteria	Rhizobiales	Hyphomicrobiaceae	Rhodoplanes	Rhodoplanes sp. Z2-YC6860
UP000295131	877384	3469	Pseudohoeflea suaedae	Bacteria	Proteobacteria	Alphaproteobacteria	Rhizobiales	Phyllobacteriaceae	Pseudohoeflea	Pseudohoeflea suaedae
UP000198964	655355	4090	Sunxiuqinia elliptica	Bacteria	Bacteroidetes	Bacteroidia	Marinilabiliales	Prolixibacteraceae	Sunxiuqinia	Sunxiuqinia elliptica
UP000243574	1965623	2021	Muribaculum sp. An287	Bacteria	Bacteroidetes	Bacteroidia	Bacteroidales	Muribaculaceae	Muribaculum	Muribaculum sp. An287
UP000017928	1262991	2572	Firmicutes bacterium CAG:882	Bacteria	Firmicutes	NaV	NaV	NaV	NaV	Firmicutes bacterium CAG:882
UP000199326	1172182	6901	Streptomyces sp. 136MFCol5.1	Bacteria	Actinobacteria	Actinobacteria	Streptomycetales	Streptomycetaceae	Streptomyces	Streptomyces sp. 136MFCol5.1
UP000189462	108003	3346	Thioalkalivibrio denitrificans	Bacteria	Proteobacteria	Gammaproteobacteria	Chromatiales	Ectothiorhodospiraceae	Thioalkalivibrio	Thioalkalivibrio denitrificans
UP000266506	2088	1953	Anaeroplasma bactoclasticum	Bacteria	Tenericutes	Mollicutes	Anaeroplasmatales	Anaeroplasmataceae	Anaeroplasma	Anaeroplasma bactoclasticum
UP000018183	1262917	2199	Prevotella sp. CAG:1031	Bacteria	Bacteroidetes	Bacteroidia	Bacteroidales	Prevotellaceae	Prevotella	Prevotella sp. CAG:1031
UP000184038	1120996	4544	Anaerosporobacter mobilis DSM 15930	Bacteria	Firmicutes	Clostridia	Clostridiales	Lachnospiraceae	Anaerosporobacter	Anaerosporobacter mobilis
UP000243750	553151	4145	Pseudomonas pelagia	Bacteria	Proteobacteria	Gammaproteobacteria	Pseudomonadales	Pseudomonadaceae	Pseudomonas	Pseudomonas pelagia
UP000002706	246194	2615	Carboxydothermus hydrogenoformans (strain ATCC BAA-161 / DSM 6008 / Z-2901)	Bacteria	Firmicutes	Clostridia	Thermoanaerobacterales	Thermoanaerobacteraceae	Carboxydothermus	Carboxydothermus hydrogenoformans
UP000191040	1736691	3277	Aeromicrobium choanae	Bacteria	Actinobacteria	Actinobacteria	Propionibacteriales	Nocardioidaceae	Aeromicrobium	Aeromicrobium choanae
UP000177882	1739367	2073	Micrococcus sp. HMSC067E09	Bacteria	Actinobacteria	Actinobacteria	Micrococcales	Micrococcaceae	Micrococcus	Micrococcus sp. HMSC067E09
UP000286997	2499852	5625	Methylobacterium sp. TER-1	Bacteria	Proteobacteria	Alphaproteobacteria	Rhizobiales	Methylobacteriaceae	Methylobacterium	Methylobacterium sp. TER-1
UP000323285	2078691	7146	Streptomyces sp. CB01881	Bacteria	Actinobacteria	Actinobacteria	Streptomycetales	Streptomycetaceae	Streptomyces	Streptomyces sp. CB01881
UP000007844	690850	3699	Desulfocurvibacter africanus subsp. africanus str. Walvis Bay	Bacteria	Proteobacteria	Deltaproteobacteria	Desulfovibrionales	Desulfovibrionaceae	Desulfocurvibacter	Desulfocurvibacter africanus
UP000291471	2053615	325	Spirochaetia bacterium	Bacteria	Spirochaetes	Spirochaetia	NaV	NaV	NaV	Spirochaetia bacterium
UP000280842	133270	1621	Hydrogenothermus marinus	Bacteria	Aquificae	Aquificae	Aquificales	Hydrogenothermaceae	Hydrogenothermus	Hydrogenothermus marinus
UP000247612	1034346	3467	Dielma fastidiosa	Bacteria	Firmicutes	Erysipelotrichia	Erysipelotrichales	Erysipelotrichaceae	Dielma	Dielma fastidiosa
UP000000276	681645	2090	Corynebacterium pseudotuberculosis (strain C231)	Bacteria	Actinobacteria	Actinobacteria	Corynebacteriales	Corynebacteriaceae	Corynebacterium	Corynebacterium pseudotuberculosis
UP000199246	1881035	4932	Mitsuaria sp. PDC51	Bacteria	Proteobacteria	Betaproteobacteria	Burkholderiales	NaV	Mitsuaria	Mitsuaria sp. PDC51
UP000305760	2546226	3016	Arenimonas sp. R29	Bacteria	Proteobacteria	Gammaproteobacteria	Xanthomonadales	Xanthomonadaceae	Arenimonas	Arenimonas sp. R29
UP000029499	216142	3893	Pseudomonas rhizosphaerae	Bacteria	Proteobacteria	Gammaproteobacteria	Pseudomonadales	Pseudomonadaceae	Pseudomonas	Pseudomonas rhizosphaerae
UP000184327	1122156	2717	Lampropedia hyalina DSM 16112	Bacteria	Proteobacteria	Betaproteobacteria	Burkholderiales	Comamonadaceae	Lampropedia	Lampropedia hyalina
UP000007468	546269	1616	Filifactor alocis (strain ATCC 35896 / D40 B5) (Fusobacterium alocis)	Bacteria	Firmicutes	Clostridia	Clostridiales	Peptostreptococcaceae	Filifactor	Filifactor alocis
UP000031129	743971	553	Mycoplasma flocculare ATCC 27399	Bacteria	Tenericutes	Mollicutes	Mycoplasmatales	Mycoplasmataceae	Mycoplasma	Mycoplasma flocculare
UP000317155	38815	3347	Desulfuromonas acetexigens	Bacteria	Proteobacteria	Deltaproteobacteria	Desulfuromonadales	Desulfuromonadaceae	Desulfuromonas	Desulfuromonas acetexigens
UP000017940	1262895	2189	Eubacterium sp. CAG:86	Bacteria	Firmicutes	Clostridia	Clostridiales	Eubacteriaceae	Eubacterium	Eubacterium sp. CAG:86
UP000006252	888052	2070	Actinomyces sp. oral taxon 180 str. F0310	Bacteria	Actinobacteria	Actinobacteria	Actinomycetales	Actinomycetaceae	Actinomyces	Actinomyces sp. oral taxon 180
UP000093111	1612624	5658	Pararhizobium polonicum	Bacteria	Proteobacteria	Alphaproteobacteria	Rhizobiales	Rhizobiaceae	Pararhizobium	Pararhizobium polonicum
UP000002708	340177	1986	Chlorobium chlorochromatii (strain CaD3)	Bacteria	Chlorobi	Chlorobia	Chlorobiales	Chlorobiaceae	Chlorobium	Chlorobium chlorochromatii
UP000321798	931535	3847	Cellulomonas soli	Bacteria	Actinobacteria	Actinobacteria	Micrococcales	Cellulomonadaceae	Cellulomonas	Cellulomonas soli
UP000002438	208964	5564	Pseudomonas aeruginosa (strain ATCC 15692 / DSM 22644 / CIP 104116 / JCM 14847 / LMG 12228 / 1C / PRS 101 / PAO1)	Bacteria	Proteobacteria	Gammaproteobacteria	Pseudomonadales	Pseudomonadaceae	Pseudomonas	Pseudomonas aeruginosa
UP000028870	258533	6271	Mycolicibacterium cosmeticum	Bacteria	Actinobacteria	Actinobacteria	Corynebacteriales	Mycobacteriaceae	Mycolicibacterium	Mycolicibacterium cosmeticum
UP000317557	1302730	3810	Gracilimonas mengyeensis	Bacteria	Balneolaeota	Balneolia	Balneolales	Balneolaceae	Gracilimonas	Gracilimonas mengyeensis
UP000018850	1286632	3353	Zhouia amylolytica AD3	Bacteria	Bacteroidetes	Flavobacteriia	Flavobacteriales	Flavobacteriaceae	Zhouia	Zhouia amylolytica
UP000050509	186479	7836	Kouleothrix aurantiaca	Bacteria	Chloroflexi	Chloroflexia	Chloroflexales	Roseiflexaceae	Kouleothrix	Kouleothrix aurantiaca
UP000220836	696760	4735	Pelagimonas varians	Bacteria	Proteobacteria	Alphaproteobacteria	Rhodobacterales	Rhodobacteraceae	Pelagimonas	Pelagimonas varians
UP000000431	272561	895	Chlamydia trachomatis (strain D/UW-3/Cx)	Bacteria	Chlamydiae	Chlamydiia	Chlamydiales	Chlamydiaceae	Chlamydia	Chlamydia trachomatis
UP000051845	1423733	3157	Lactobacillus collinoides DSM 20515 = JCM 1123	Bacteria	Firmicutes	Bacilli	Lactobacillales	Lactobacillaceae	Lactobacillus	Lactobacillus collinoides
UP000010366	1173020	5815	Chamaesiphon minutus (strain ATCC 27169 / PCC 6605)	Bacteria	Cyanobacteria	NaV	Synechococcales	Chamaesiphonaceae	Chamaesiphon	Chamaesiphon minutus
UP000246352	274592	4798	Hoeflea marina	Bacteria	Proteobacteria	Alphaproteobacteria	Rhizobiales	Phyllobacteriaceae	Hoeflea	Hoeflea marina
UP000036106	1007676	2337	Lactobacillus ginsenosidimutans	Bacteria	Firmicutes	Bacilli	Lactobacillales	Lactobacillaceae	Lactobacillus	Lactobacillus ginsenosidimutans
UP000239706	1289519	2785	Clostridium liquoris	Bacteria	Firmicutes	Clostridia	Clostridiales	Clostridiaceae	Clostridium	Clostridium liquoris
UP000031572	709839	4102	Noviherbaspirillum autotrophicum	Bacteria	Proteobacteria	Betaproteobacteria	Burkholderiales	Oxalobacteraceae	Noviherbaspirillum	Noviherbaspirillum autotrophicum
UP000065540	1416753	5422	Ensifer adhaerens OV14	Bacteria	Proteobacteria	Alphaproteobacteria	Rhizobiales	Rhizobiaceae	Ensifer	Ensifer adhaerens
UP000256727	169134	3030	Citricoccus muralis	Bacteria	Actinobacteria	Actinobacteria	Micrococcales	Micrococcaceae	Citricoccus	Citricoccus muralis
UP000093391	1789224	3108	Acinetobacter larvae	Bacteria	Proteobacteria	Gammaproteobacteria	Pseudomonadales	Moraxellaceae	Acinetobacter	Acinetobacter larvae
UP000056968	1332080	4283	Sphingobium baderi	Bacteria	Proteobacteria	Alphaproteobacteria	Sphingomonadales	Sphingomonadaceae	Sphingobium	Sphingobium baderi
UP000199666	414048	3767	Pedobacter insulae	Bacteria	Bacteroidetes	Sphingobacteriia	Sphingobacteriales	Sphingobacteriaceae	Pedobacter	Pedobacter insulae
UP000250207	2082193	2714	Clostridiaceae bacterium 14S0207	Bacteria	Firmicutes	Clostridia	Clostridiales	Clostridiaceae	NaV	Clostridiaceae bacterium 14S0207
UP000009175	326297	3638	Shewanella amazonensis (strain ATCC BAA-1098 / SB2B)	Bacteria	Proteobacteria	Gammaproteobacteria	Alteromonadales	Shewanellaceae	Shewanella	Shewanella amazonensis
UP000031030	1348253	3509	Microbacterium mangrovi	Bacteria	Actinobacteria	Actinobacteria	Micrococcales	Microbacteriaceae	Microbacterium	Microbacterium mangrovi
UP000092657	1850362	5758	Bacillus sp. FJAT-27264	Bacteria	Firmicutes	Bacilli	Bacillales	Bacillaceae	Bacillus	Bacillus sp. FJAT-27264
UP000033616	1359168	1067	Orientia chuto str. Dubai	Bacteria	Proteobacteria	Alphaproteobacteria	Rickettsiales	Rickettsiaceae	Orientia	Orientia chuto
UP000179935	1428652	5856	Streptomyces sp. MUSC 93	Bacteria	Actinobacteria	Actinobacteria	Streptomycetales	Streptomycetaceae	Streptomyces	Streptomyces sp. MUSC 93
UP000199422	1761803	3641	Microbacterium sp. cf046	Bacteria	Actinobacteria	Actinobacteria	Micrococcales	Microbacteriaceae	Microbacterium	Microbacterium sp. cf046
UP000001662	610130	4133	Clostridium saccharolyticum (strain ATCC 35040 / DSM 2544 / NRCC 2533 / WM1)	Bacteria	Firmicutes	Clostridia	Clostridiales	Lachnospiraceae	Lacrimispora	Lacrimispora saccharolytica
UP000195166	1851577	6556	Variovorax sp. JS1663	Bacteria	Proteobacteria	Betaproteobacteria	Burkholderiales	Comamonadaceae	Variovorax	Variovorax sp. JS1663
UP000239772	2109933	4752	Alsobacter sp. SH9	Bacteria	Proteobacteria	Alphaproteobacteria	Rhizobiales	NaV	Alsobacter	Alsobacter sp. SH9
UP000269039	2321229	3326	Salinisphaera sp. Q1T1-3	Bacteria	Proteobacteria	Gammaproteobacteria	Salinisphaerales	Salinisphaeraceae	Salinisphaera	Salinisphaera sp. Q1T1-3
UP000238044	1827294	3783	Microbacterium sp. MYb45	Bacteria	Actinobacteria	Actinobacteria	Micrococcales	Microbacteriaceae	Microbacterium	Microbacterium sp. MYb45
UP000003922	165597	5659	Crocosphaera watsonii WH 8501	Bacteria	Cyanobacteria	NaV	Chroococcales	Aphanothecaceae	Crocosphaera	Crocosphaera watsonii
UP000216795	2024580	5179	Plantactinospora sp. KBS50	Bacteria	Actinobacteria	Actinobacteria	Micromonosporales	Micromonosporaceae	Plantactinospora	Plantactinospora sp. KBS50
UP000095403	463642	7251	Streptomyces sp. F-1	Bacteria	Actinobacteria	Actinobacteria	Streptomycetales	Streptomycetaceae	Streptomyces	Streptomyces sp. F-1
UP000013520	767817	4313	Desulfallas gibsoniae DSM 7213	Bacteria	Firmicutes	Clostridia	Clostridiales	Peptococcaceae	Desulfallas	Desulfallas gibsoniae
UP000018313	1262799	1707	Clostridium sp. CAG:354	Bacteria	Firmicutes	Clostridia	Clostridiales	Clostridiaceae	Clostridium	Clostridium sp. CAG:354
UP000190037	159449	9009	Embleya scabrispora	Bacteria	Actinobacteria	Actinobacteria	Streptomycetales	Streptomycetaceae	Embleya	Embleya scabrispora
UP000003620	658088	2717	Lachnospiraceae bacterium 9_1_43BFAA	Bacteria	Firmicutes	Clostridia	Clostridiales	Lachnospiraceae	NaV	Lachnospiraceae bacterium 9_1_43BFAA
UP000216991	1981098	3280	Sandarakinorhabdus cyanobacteriorum	Bacteria	Proteobacteria	Alphaproteobacteria	Sphingomonadales	Sphingomonadaceae	Sandarakinorhabdus	Sandarakinorhabdus cyanobacteriorum
UP000199699	145857	5321	Micromonospora nigra	Bacteria	Actinobacteria	Actinobacteria	Micromonosporales	Micromonosporaceae	Micromonospora	Micromonospora nigra
UP000051568	319652	1916	Pediococcus cellicola	Bacteria	Firmicutes	Bacilli	Lactobacillales	Lactobacillaceae	Pediococcus	Pediococcus cellicola
UP000243077	1159327	1693	Pontimonas salivibrio	Bacteria	Actinobacteria	Actinobacteria	Micrococcales	Microbacteriaceae	Pontimonas	Pontimonas salivibrio
UP000245711	1990687	6874	Rhodococcus sp. S2-17	Bacteria	Actinobacteria	Actinobacteria	Corynebacteriales	Nocardiaceae	Rhodococcus	Rhodococcus sp. S2-17
UP000011758	999415	1874	Eggerthia catenaformis OT 569 = DSM 20559	Bacteria	Firmicutes	Erysipelotrichia	Erysipelotrichales	Erysipelotrichaceae	Eggerthia	Eggerthia catenaformis
UP000265768	2339229	7783	Streptosporangiaceae bacterium YIM 75507	Bacteria	Actinobacteria	Actinobacteria	Streptosporangiales	Streptosporangiaceae	NaV	Streptosporangiaceae bacterium YIM 75507
UP000317617	104099	2680	Acetobacter orleanensis	Bacteria	Proteobacteria	Alphaproteobacteria	Rhodospirillales	Acetobacteraceae	Acetobacter	Acetobacter orleanensis
UP000231451	2045441	2025	Bifidobacterium simiarum	Bacteria	Actinobacteria	Actinobacteria	Bifidobacteriales	Bifidobacteriaceae	Bifidobacterium	Bifidobacterium simiarum
UP000294902	682400	2857	Natranaerovirga pectinivora	Bacteria	Firmicutes	Clostridia	Clostridiales	NaV	Natranaerovirga	Natranaerovirga pectinivora
UP000027088	2113	610	Mycoplasma californicum	Bacteria	Tenericutes	Mollicutes	Mycoplasmatales	Mycoplasmataceae	Mycoplasma	Mycoplasma californicum
UP000321484	43671	3422	Actinotalea fermentans	Bacteria	Actinobacteria	Actinobacteria	Micrococcales	Cellulomonadaceae	Actinotalea	Actinotalea fermentans
UP000003045	871571	2379	Mobiluncus mulieris ATCC 35239	Bacteria	Actinobacteria	Actinobacteria	Actinomycetales	Actinomycetaceae	Mobiluncus	Mobiluncus mulieris
UP000095036	1896164	2668	Luteimonas sp. JM171	Bacteria	Proteobacteria	Gammaproteobacteria	Xanthomonadales	Xanthomonadaceae	Luteimonas	Luteimonas sp. JM171
UP000018199	1262913	2823	Parabacteroides sp. CAG:409	Bacteria	Bacteroidetes	Bacteroidia	Bacteroidales	Tannerellaceae	Parabacteroides	Parabacteroides sp. CAG:409
UP000295305	2512213	5840	Rhodococcus sp. SMB37	Bacteria	Actinobacteria	Actinobacteria	Corynebacteriales	Nocardiaceae	Rhodococcus	Rhodococcus sp. SMB37
UP000199138	1224947	3719	Pustulibacterium marinum	Bacteria	Bacteroidetes	Flavobacteriia	Flavobacteriales	Flavobacteriaceae	Pustulibacterium	Pustulibacterium marinum
UP000018076	1262803	2197	Clostridium sp. CAG:413	Bacteria	Firmicutes	Clostridia	Clostridiales	Clostridiaceae	Clostridium	Clostridium sp. CAG:413
UP000285774	2049045	1822	Eubacteriaceae bacterium	Bacteria	Firmicutes	Clostridia	Clostridiales	Eubacteriaceae	NaV	Eubacteriaceae bacterium
UP000192393	1434700	2974	Moheibacter sediminis	Bacteria	Bacteroidetes	Flavobacteriia	Flavobacteriales	Flavobacteriaceae	Moheibacter	Moheibacter sediminis
UP000026922	1321371	1184	Holospora undulata HU1	Bacteria	Proteobacteria	Alphaproteobacteria	Holosporales	Holosporaceae	Holospora	Holospora undulata
UP000008461	760192	6704	Haliscomenobacter hydrossis (strain ATCC 27775 / DSM 1100 / LMG 10767 / O)	Bacteria	Bacteroidetes	Saprospiria	Saprospirales	Haliscomenobacteraceae	Haliscomenobacter	Haliscomenobacter hydrossis
UP000218272	120107	3852	Sphingobium cloacae	Bacteria	Proteobacteria	Alphaproteobacteria	Sphingomonadales	Sphingomonadaceae	Sphingobium	Sphingobium cloacae
UP000248916	568105	4336	Hwanghaeicola aestuarii	Bacteria	Proteobacteria	Alphaproteobacteria	Rhodobacterales	Rhodobacteraceae	Hwanghaeicola	Hwanghaeicola aestuarii
UP000267187	569599	2413	Umboniibacter marinipuniceus	Bacteria	Proteobacteria	Gammaproteobacteria	Cellvibrionales	Cellvibrionaceae	Umboniibacter	Umboniibacter marinipuniceus
UP000232070	2020325	6507	Streptomyces sp. CB01373	Bacteria	Actinobacteria	Actinobacteria	Streptomycetales	Streptomycetaceae	Streptomyces	Streptomyces sp. CB01373
UP000012019	1286106	2536	Methylophaga lonarensis MPL	Bacteria	Proteobacteria	Gammaproteobacteria	Thiotrichales	Piscirickettsiaceae	Methylophaga	Methylophaga lonarensis
UP000005435	720554	3774	Hungateiclostridium clariflavum (strain DSM 19732 / NBRC 101661 / EBR45) (Clostridium clariflavum)	Bacteria	Firmicutes	Clostridia	Clostridiales	Hungateiclostridiaceae	Hungateiclostridium	Hungateiclostridium clariflavum
UP000004504	883109	1765	Eubacterium infirmum F0142	Bacteria	Firmicutes	Clostridia	Clostridiales	Clostridiales Family XIII. Incertae Sedis	NaV	[Eubacterium] infirmum
UP000242329	1123382	2141	Thermosyntropha lipolytica DSM 11003	Bacteria	Firmicutes	Clostridia	Clostridiales	Syntrophomonadaceae	Thermosyntropha	Thermosyntropha lipolytica
UP000238959	2080582	3250	Subtercola sp. Z020	Bacteria	Actinobacteria	Actinobacteria	Micrococcales	Microbacteriaceae	Subtercola	Subtercola sp. Z020
UP000192421	1940822	2898	Oceanospirillales bacterium LUC14_002_19_P2	Bacteria	Proteobacteria	Gammaproteobacteria	Oceanospirillales	NaV	NaV	Oceanospirillales bacterium LUC14_002_19_P2
UP000244023	2161864	4256	Opitutus sp. ER46	Bacteria	Verrucomicrobia	Opitutae	Opitutales	Opitutaceae	Opitutus	Opitutus sp. ER46
UP000001918	471852	4888	Thermomonospora curvata (strain ATCC 19995 / DSM 43183 / JCM 3096 / NBRC 15933 / NCIMB 10081 / Henssen B9)	Bacteria	Actinobacteria	Actinobacteria	Streptosporangiales	Thermomonosporaceae	Thermomonospora	Thermomonospora curvata
UP000256561	1938339	3306	Alteromonas aestuariivivens	Bacteria	Proteobacteria	Gammaproteobacteria	Alteromonadales	Alteromonadaceae	Alteromonas	Alteromonas aestuariivivens
UP000320776	2377	4716	Sporomusa termitida	Bacteria	Firmicutes	Negativicutes	Selenomonadales	Sporomusaceae	Sporomusa	Sporomusa termitida
UP000198773	152573	3615	Alkalimonas amylolytica	Bacteria	Proteobacteria	Gammaproteobacteria	NaV	NaV	Alkalimonas	Alkalimonas amylolytica
UP000295096	1442381	7087	Dankookia rubra	Bacteria	Proteobacteria	Alphaproteobacteria	Rhodospirillales	Acetobacteraceae	Dankookia	Dankookia rubra
UP000285913	2292271	3679	Lachnospiraceae bacterium AM48-27BH	Bacteria	Firmicutes	Clostridia	Clostridiales	Lachnospiraceae	NaV	Lachnospiraceae bacterium AM48-27BH
UP000070688	686597	4480	Martelella sp. AD-3	Bacteria	Proteobacteria	Alphaproteobacteria	Rhizobiales	Aurantimonadaceae	Martelella	Martelella sp. AD-3
UP000176615	1739315	2027	Globicatella sp. HMSC072A10	Bacteria	Firmicutes	Bacilli	Lactobacillales	Aerococcaceae	Globicatella	Globicatella sp. HMSC072A10
UP000315375	2592070	3683	Elioraea sp. Yellowstone	Bacteria	Proteobacteria	Alphaproteobacteria	Rhodospirillales	Elioraeaceae	Elioraea	Elioraea sp. Yellowstone
UP000070467	502393	1251	Gemella asaccharolytica	Bacteria	Firmicutes	Bacilli	Bacillales	NaV	Gemella	Gemella asaccharolytica
UP000006764	391936	3686	Alcanivorax pacificus W11-5	Bacteria	Proteobacteria	Gammaproteobacteria	Oceanospirillales	Alcanivoracaceae	Alcanivorax	Alcanivorax pacificus
UP000028393	1445513	1967	Gilliamella apicola SCGC AB-598-B02	Bacteria	Proteobacteria	Gammaproteobacteria	Orbales	Orbaceae	Gilliamella	Gilliamella apicola
UP000226437	438751	3525	Lewinella marina	Bacteria	Bacteroidetes	Saprospiria	Saprospirales	Lewinellaceae	Lewinella	Lewinella marina
UP000249337	2044595	1051	Candidatus Gracilibacteria bacterium	Bacteria	Candidatus Gracilibacteria	NaV	NaV	NaV	NaV	Candidatus Gracilibacteria bacterium
UP000010797	871963	3294	Desulfitobacterium dichloroeliminans (strain LMG P-21439 / DCA1)	Bacteria	Firmicutes	Clostridia	Clostridiales	Peptococcaceae	Desulfitobacterium	Desulfitobacterium dichloroeliminans
UP000020218	1454001	3906	Candidatus Accumulibacter sp. SK-12	Bacteria	Proteobacteria	Betaproteobacteria	NaV	NaV	Candidatus Accumulibacter	Candidatus Accumulibacter sp. SK-12
UP000094452	1774745	4000	Cupriavidus sp. UYMMa02A	Bacteria	Proteobacteria	Betaproteobacteria	Burkholderiales	Burkholderiaceae	Cupriavidus	Cupriavidus sp. UYMMa02A
UP000186720	1302689	5195	Mucilaginibacter polytrichastri	Bacteria	Bacteroidetes	Sphingobacteriia	Sphingobacteriales	Sphingobacteriaceae	Mucilaginibacter	Mucilaginibacter polytrichastri
UP000279994	661485	4648	Marmoricola pocheonensis	Bacteria	Actinobacteria	Actinobacteria	Propionibacteriales	Nocardioidaceae	Marmoricola	Marmoricola pocheonensis
UP000294829	1549640	3747	Sapientia aquatica	Bacteria	Proteobacteria	Betaproteobacteria	Burkholderiales	Oxalobacteraceae	Sapientia	Sapientia aquatica
UP000033764	332411	4103	Aquitalea magnusonii	Bacteria	Proteobacteria	Betaproteobacteria	Neisseriales	Chromobacteriaceae	Aquitalea	Aquitalea magnusonii
UP000263993	2292256	3838	Pseudolabrys sp. GY_H	Bacteria	Proteobacteria	Alphaproteobacteria	Rhizobiales	Xanthobacteraceae	Pseudolabrys	Pseudolabrys sp. GY_H
UP000017964	1263032	1377	Firmicutes bacterium CAG:822	Bacteria	Firmicutes	NaV	NaV	NaV	NaV	Firmicutes bacterium CAG:822
UP000294533	2557994	3302	Sphingobacterium sp. CZ-2	Bacteria	Bacteroidetes	Sphingobacteriia	Sphingobacteriales	Sphingobacteriaceae	Sphingobacterium	Sphingobacterium sp. CZ-2
UP000198591	1882831	3180	Verrucomicrobium sp. GAS474	Bacteria	Verrucomicrobia	Verrucomicrobiae	Verrucomicrobiales	Verrucomicrobiaceae	Verrucomicrobium	Verrucomicrobium sp. GAS474
UP000217493	1945892	4431	Cytophagales bacterium TFI 002	Bacteria	Bacteroidetes	Cytophagia	Cytophagales	NaV	NaV	Cytophagales bacterium TFI 002
UP000294937	1179467	2870	Hazenella coriacea	Bacteria	Firmicutes	Bacilli	Bacillales	Thermoactinomycetaceae	Hazenella	Hazenella coriacea
UP000077255	445710	3854	Dyella thiooxydans	Bacteria	Proteobacteria	Gammaproteobacteria	Xanthomonadales	Rhodanobacteraceae	Dyella	Dyella thiooxydans
UP000242190	1261636	2255	Anaerostipes sp. 494a	Bacteria	Firmicutes	Clostridia	Clostridiales	Lachnospiraceae	Anaerostipes	Anaerostipes sp. 494a
UP000277934	2486468	3287	Muribaculaceae bacterium Isolate-080 (Janvier)	Bacteria	Bacteroidetes	Bacteroidia	Bacteroidales	Muribaculaceae	NaV	Muribaculaceae bacterium Isolate-080 (Janvier)
UP000000243	391295	2178	Streptococcus suis (strain 05ZYH33)	Bacteria	Firmicutes	Bacilli	Lactobacillales	Streptococcaceae	Streptococcus	Streptococcus suis
UP000291613	2528245	3283	Hansschlegelia sp. Dub	Bacteria	Proteobacteria	Alphaproteobacteria	Rhizobiales	Methylocystaceae	Hansschlegelia	Hansschlegelia sp. Dub
UP000033074	698960	1166	Gardnerella vaginalis 00703Dmash	Bacteria	Actinobacteria	Actinobacteria	Bifidobacteriales	Bifidobacteriaceae	Gardnerella	Gardnerella vaginalis
UP000188866	84025	1869	Clostridium haemolyticum	Bacteria	Firmicutes	Clostridia	Clostridiales	Clostridiaceae	Clostridium	Clostridium haemolyticum
UP000051254	266128	2597	Stenotrophomonas koreensis	Bacteria	Proteobacteria	Gammaproteobacteria	Xanthomonadales	Xanthomonadaceae	Stenotrophomonas	Stenotrophomonas koreensis
UP000183447	665118	3974	Devosia enhydra	Bacteria	Proteobacteria	Alphaproteobacteria	Rhizobiales	Hyphomicrobiaceae	Devosia	Devosia enhydra
UP000243197	242600	1467	Ichthyobacterium seriolicida	Bacteria	Bacteroidetes	Flavobacteriia	Flavobacteriales	Ichthyobacteriaceae	Ichthyobacterium	Ichthyobacterium seriolicida
UP000001185	426117	6647	Methylobacterium sp. (strain 4-46)	Bacteria	Proteobacteria	Alphaproteobacteria	Rhizobiales	Methylobacteriaceae	Methylobacterium	Methylobacterium sp. 4-46
UP000196143	1987723	4268	Cellvibrio sp. PSBB006	Bacteria	Proteobacteria	Gammaproteobacteria	Cellvibrionales	Cellvibrionaceae	Cellvibrio	Cellvibrio sp. PSBB006
UP000000582	196627	3093	Corynebacterium glutamicum (strain ATCC 13032 / DSM 20300 / JCM 1318 / LMG 3730 / NCIMB 10025)	Bacteria	Actinobacteria	Actinobacteria	Corynebacteriales	Corynebacteriaceae	Corynebacterium	Corynebacterium glutamicum
UP000273083	1329262	3612	Mobilisporobacter senegalensis	Bacteria	Firmicutes	Clostridia	Clostridiales	Lachnospiraceae	Mobilisporobacter	Mobilisporobacter senegalensis
UP000018451	742723	2056	Lachnospiraceae bacterium 2_1_46FAA	Bacteria	Firmicutes	Clostridia	Clostridiales	Lachnospiraceae	NaV	Lachnospiraceae bacterium 2_1_46FAA
UP000004685	575590	1854	Bacteroidetes oral taxon 274 str. F0058	Bacteria	Bacteroidetes	NaV	NaV	NaV	NaV	Bacteroidetes oral taxon 274
UP000234775	87541	1496	Aerococcus christensenii	Bacteria	Firmicutes	Bacilli	Lactobacillales	Aerococcaceae	Aerococcus	Aerococcus christensenii
UP000036087	1658766	1624	Fructobacillus sp. EFB-N1	Bacteria	Firmicutes	Bacilli	Lactobacillales	Leuconostocaceae	Fructobacillus	Fructobacillus sp. EFB-N1
UP000197023	1277350	3513	Geobacter sp. DSM 9736	Bacteria	Proteobacteria	Deltaproteobacteria	Desulfuromonadales	Geobacteraceae	Geobacter	Geobacter sp. DSM 9736
UP000054262	383631	1336	Methylophilales bacterium HTCC2181	Bacteria	Proteobacteria	Betaproteobacteria	Nitrosomonadales	NaV	NaV	Methylophilales bacterium HTCC2181
UP000037738	1519490	7314	Streptomyces sp. NRRL WC-3618	Bacteria	Actinobacteria	Actinobacteria	Streptomycetales	Streptomycetaceae	Streptomyces	Streptomyces sp. NRRL WC-3618
UP000037694	1519494	5253	Nocardiopsis sp. NRRL B-16309	Bacteria	Actinobacteria	Actinobacteria	Streptosporangiales	Nocardiopsaceae	Nocardiopsis	Nocardiopsis sp. NRRL B-16309
UP000283644	2049295	6094	Nocardioides immobilis	Bacteria	Actinobacteria	Actinobacteria	Propionibacteriales	Nocardioidaceae	Nocardioides	Nocardioides immobilis
UP000267342	33074	2668	Zymobacter palmae	Bacteria	Proteobacteria	Gammaproteobacteria	Oceanospirillales	Halomonadaceae	Zymobacter	Zymobacter palmae
UP000199475	686624	2895	Tessaracoccus oleiagri	Bacteria	Actinobacteria	Actinobacteria	Propionibacteriales	Propionibacteriaceae	Tessaracoccus	Tessaracoccus oleiagri
UP000011220	1121335	2669	Thermoclostridium stercorarium (strain ATCC 35414 / DSM 8532 / NCIMB 11754) (Clostridium stercorarium)	Bacteria	Firmicutes	Clostridia	Clostridiales	Hungateiclostridiaceae	Thermoclostridium	Thermoclostridium stercorarium
UP000017105	1111134	1924	Peptoniphilus sp. BV3C26	Bacteria	Firmicutes	Tissierellia	Tissierellales	Peptoniphilaceae	Peptoniphilus	Peptoniphilus sp. BV3C26
UP000037737	84292	2721	Microbacterium chocolatum	Bacteria	Actinobacteria	Actinobacteria	Micrococcales	Microbacteriaceae	Microbacterium	Microbacterium chocolatum
UP000009234	696281	3763	Desulfotomaculum ruminis (strain ATCC 23193 / DSM 2154 / NCIMB 8452 / DL)	Bacteria	Firmicutes	Clostridia	Clostridiales	Peptococcaceae	Desulfotomaculum	Desulfotomaculum ruminis
UP000198822	399736	3218	Agrococcus jejuensis	Bacteria	Actinobacteria	Actinobacteria	Micrococcales	Microbacteriaceae	Agrococcus	Agrococcus jejuensis
UP000185721	1804758	7703	Streptomyces sp. CB03911	Bacteria	Actinobacteria	Actinobacteria	Streptomycetales	Streptomycetaceae	Streptomyces	Streptomyces sp. CB03911
UP000054510	1081644	1364	Candidatus Aquiluna sp. IMCC13023	Bacteria	Actinobacteria	Actinobacteria	Micrococcales	Microbacteriaceae	Candidatus Aquiluna	Candidatus Aquiluna sp. IMCC13023
UP000018361	1263102	2331	Prevotella copri CAG:164	Bacteria	Bacteroidetes	Bacteroidia	Bacteroidales	Prevotellaceae	Prevotella	Prevotella copri CAG:164
UP000220277	2033483	4840	Bacillus sp. AFS006103	Bacteria	Firmicutes	Bacilli	Bacillales	Bacillaceae	Bacillus	Bacillus sp. AFS006103
UP000269352	2218524	2306	Candidatus Termititenax aidoneus	Bacteria	Candidatus Margulisbacteria	Candidatus Termititenacia	Candidatus Termititenacales	Candidatus Termititenacaceae	Candidatus Termititenax	Candidatus Termititenax aidoneus
UP000032336	1121877	2974	Ferrimicrobium acidiphilum DSM 19497	Bacteria	Actinobacteria	Acidimicrobiia	Acidimicrobiales	Acidimicrobiaceae	Ferrimicrobium	Ferrimicrobium acidiphilum
UP000260281	1871037	3010	Flavobacteriaceae bacterium	Bacteria	Bacteroidetes	Flavobacteriia	Flavobacteriales	Flavobacteriaceae	NaV	Flavobacteriaceae bacterium
UP000199540	1200751	2881	Ruminococcaceae bacterium P7	Bacteria	Firmicutes	Clostridia	Clostridiales	Ruminococcaceae	NaV	Ruminococcaceae bacterium P7
UP000018230	1262941	2378	Roseburia sp. CAG:18	Bacteria	Firmicutes	Clostridia	Clostridiales	Lachnospiraceae	Roseburia	Roseburia sp. CAG:18
UP000284135	2292191	3622	Anaerotruncus sp. AF02-27	Bacteria	Firmicutes	Clostridia	Clostridiales	Ruminococcaceae	Anaerotruncus	Anaerotruncus sp. AF02-27
UP000317542	935263	4171	Mesorhizobium sp. J18	Bacteria	Proteobacteria	Alphaproteobacteria	Rhizobiales	Phyllobacteriaceae	Mesorhizobium	Mesorhizobium sp. J18
UP000317422	405555	4398	Haloactinospora alba	Bacteria	Actinobacteria	Actinobacteria	Streptosporangiales	Nocardiopsaceae	Haloactinospora	Haloactinospora alba
UP000016662	411473	3475	Ruminococcus callidus ATCC 27760	Bacteria	Firmicutes	Clostridia	Clostridiales	Ruminococcaceae	Ruminococcus	Ruminococcus callidus
UP000006732	338966	3694	Pelobacter propionicus (strain DSM 2379 / NBRC 103807 / OttBd1)	Bacteria	Proteobacteria	Deltaproteobacteria	Desulfuromonadales	Desulfuromonadaceae	Pelobacter	Pelobacter propionicus
UP000219828	39688	5206	Mycolicibacterium duvalii	Bacteria	Actinobacteria	Actinobacteria	Corynebacteriales	Mycobacteriaceae	Mycolicibacterium	Mycolicibacterium duvalii
UP000198976	131110	2036	Schaalia radingae	Bacteria	Actinobacteria	Actinobacteria	Actinomycetales	Actinomycetaceae	Schaalia	Schaalia radingae
UP000244162	1735121	3532	Sphingomonas oleivorans	Bacteria	Proteobacteria	Alphaproteobacteria	Sphingomonadales	Sphingomonadaceae	Sphingomonas	Sphingomonas oleivorans
UP000037397	1631356	3827	Luteipulveratus halotolerans	Bacteria	Actinobacteria	Actinobacteria	Micrococcales	Dermacoccaceae	Luteipulveratus	Luteipulveratus halotolerans
UP000237822	407159	3374	Knoellia remsis	Bacteria	Actinobacteria	Actinobacteria	Micrococcales	Intrasporangiaceae	Tetrasphaera	Knoellia remsis
UP000092151	1834149	4184	Mycobacterium sp. E740	Bacteria	Actinobacteria	Actinobacteria	Corynebacteriales	Mycobacteriaceae	Mycobacterium	Mycobacterium sp. E740
UP000269080	2487415	5069	Streptomyces sp. WAC00469	Bacteria	Actinobacteria	Actinobacteria	Streptomycetales	Streptomycetaceae	Streptomyces	Streptomyces sp. WAC00469
UP000319342	2528008	3741	Planctomycetes bacterium Pla163	Bacteria	Planctomycetes	NaV	NaV	NaV	NaV	Planctomycetes bacterium Pla163
UP000316584	1176533	2469	Luteimonas sp. Gr-4	Bacteria	Proteobacteria	Gammaproteobacteria	Xanthomonadales	Xanthomonadaceae	Luteimonas	Luteimonas sp. Gr-4
UP000198213	1192162	3722	Vogesella sp. LIG4	Bacteria	Proteobacteria	Betaproteobacteria	Neisseriales	Chromobacteriaceae	Vogesella	Vogesella sp. LIG4
UP000246018	2138300	4337	Nocardioides sp. WSJ-1	Bacteria	Actinobacteria	Actinobacteria	Propionibacteriales	Nocardioidaceae	Nocardioides	Nocardioides gansuensis
UP000271031	511487	5987	Brevibacillus fluminis	Bacteria	Firmicutes	Bacilli	Bacillales	Paenibacillaceae	Brevibacillus	Brevibacillus fluminis
UP000037109	1459	5125	Sporosarcina globispora (Bacillus globisporus)	Bacteria	Firmicutes	Bacilli	Bacillales	Planococcaceae	Sporosarcina	Sporosarcina globispora
UP000051752	1736603	4304	Terrabacter sp. Root85	Bacteria	Actinobacteria	Actinobacteria	Micrococcales	Intrasporangiaceae	Terrabacter	Terrabacter sp. Root85
UP000185678	80876	3976	Insolitispirillum peregrinum	Bacteria	Proteobacteria	Alphaproteobacteria	Rhodospirillales	Rhodospirillaceae	Insolitispirillum	Insolitispirillum peregrinum
UP000193870	315423	3664	Palleronia marisminoris	Bacteria	Proteobacteria	Alphaproteobacteria	Rhodobacterales	Rhodobacteraceae	Palleronia	Palleronia marisminoris
UP000219331	538381	4539	Stappia indica	Bacteria	Proteobacteria	Alphaproteobacteria	Rhodobacterales	Rhodobacteraceae	Stappia	Stappia indica
UP000192674	2030	11140	Kibdelosporangium aridum	Bacteria	Actinobacteria	Actinobacteria	Pseudonocardiales	Pseudonocardiaceae	Kibdelosporangium	Kibdelosporangium aridum
UP000189211	1884657	1656	Epulopiscium sp. Nuni2H_MBin003	Bacteria	Firmicutes	Clostridia	Clostridiales	Lachnospiraceae	Epulopiscium	Epulopiscium sp. Nuni2H_MBin003
UP000257055	1621700	2426	Listeria kieliensis	Bacteria	Firmicutes	Bacilli	Bacillales	Listeriaceae	Listeria	Listeria kieliensis
UP000216913	1395608	4667	Bordetella genomosp. 5	Bacteria	Proteobacteria	Betaproteobacteria	Burkholderiales	Alcaligenaceae	Bordetella	Bordetella genomosp. 5
UP000193495	1343159	3683	Limimaricola soesokkakensis	Bacteria	Proteobacteria	Alphaproteobacteria	Rhodobacterales	Rhodobacteraceae	Limimaricola	Limimaricola soesokkakensis
UP000245938	202750	3241	Kurthia sibirica	Bacteria	Firmicutes	Bacilli	Bacillales	Planococcaceae	Kurthia	Kurthia sibirica
UP000284057	2293569	6027	Jiangella sp. NEAU-YY265	Bacteria	Actinobacteria	Actinobacteria	Jiangellales	Jiangellaceae	Jiangella	Jiangella sp. NEAU-YY265
UP000244904	1695997	3838	Primorskyibacter insulae	Bacteria	Proteobacteria	Alphaproteobacteria	Rhodobacterales	Rhodobacteraceae	Primorskyibacter	Primorskyibacter insulae
UP000192333	758820	4889	Aquiflexum balticum DSM 16537	Bacteria	Bacteroidetes	Cytophagia	Cytophagales	Cyclobacteriaceae	Aquiflexum	Aquiflexum balticum
UP000029601	1230734	1151	Clostridiales bacterium S5-A14a	Bacteria	Firmicutes	Clostridia	Clostridiales	Clostridiales Family XIII. Incertae Sedis	NaV	Clostridiales bacterium S5-A14a
UP000236443	2035436	1586	bacterium HR41	Bacteria	NaV	NaV	NaV	NaV	NaV	bacterium HR41
UP000293638	598652	3963	Motilibacter rhizosphaerae	Bacteria	Actinobacteria	Actinobacteria	Frankiales	Motilibacteraceae	Motilibacter	Motilibacter rhizosphaerae
UP000187404	1261640	2432	Eubacterium sp. 68-3-10	Bacteria	Firmicutes	Clostridia	Clostridiales	Eubacteriaceae	Eubacterium	Eubacterium sp. 68-3-10
UP000265725	2320858	2474	Paenisporosarcina sp. K2R23-3	Bacteria	Firmicutes	Bacilli	Bacillales	Planococcaceae	Paenisporosarcina	Paenisporosarcina sp. K2R23-3
UP000198560	1855325	2763	Prevotella sp. KH2C16	Bacteria	Bacteroidetes	Bacteroidia	Bacteroidales	Prevotellaceae	Prevotella	Prevotella sp. KH2C16
UP000276282	270921	3228	Gillisia mitskevichiae	Bacteria	Bacteroidetes	Flavobacteriia	Flavobacteriales	Flavobacteriaceae	Gillisia	Gillisia mitskevichiae
UP000011910	1279009	4225	Cesiribacter andamanensis AMV16	Bacteria	Bacteroidetes	Cytophagia	Cytophagales	Flammeovirgaceae	Cesiribacter	Cesiribacter andamanensis
UP000016412	1125725	2624	Treponema socranskii subsp. socranskii VPI DR56BR1116 = ATCC 35536	Bacteria	Spirochaetes	Spirochaetia	Spirochaetales	Spirochaetaceae	Treponema	Treponema socranskii
UP000182480	1502764	5982	Paenibacillus sp. UNCCL117	Bacteria	Firmicutes	Bacilli	Bacillales	Paenibacillaceae	Paenibacillus	Paenibacillus sp. UNCCL117
UP000253083	644221	3918	Arenicella xantha	Bacteria	Proteobacteria	Gammaproteobacteria	Arenicellales	Arenicellaceae	Arenicella	Arenicella xantha
UP000078558	1851544	4379	Orrella dioscoreae	Bacteria	Proteobacteria	Betaproteobacteria	Burkholderiales	Alcaligenaceae	Orrella	Orrella dioscoreae
UP000003240	1009370	4283	Acetonema longum DSM 6540	Bacteria	Firmicutes	Negativicutes	Selenomonadales	Sporomusaceae	Acetonema	Acetonema longum
UP000014113	1121865	2315	Enterococcus columbae DSM 7374 = ATCC 51263	Bacteria	Firmicutes	Bacilli	Lactobacillales	Enterococcaceae	Enterococcus	Enterococcus columbae
UP000059935	1729581	3323	Flavobacterium sp. TAB 87	Bacteria	Bacteroidetes	Flavobacteriia	Flavobacteriales	Flavobacteriaceae	Flavobacterium	Flavobacterium sp. TAB 87
UP000017947	1262809	1322	Clostridium sp. CAG:451	Bacteria	Firmicutes	Clostridia	Clostridiales	Clostridiaceae	Clostridium	Clostridium sp. CAG:451
UP000198683	683260	7903	Nonomuraea maritima	Bacteria	Actinobacteria	Actinobacteria	Streptosporangiales	Streptosporangiaceae	Nonomuraea	Nonomuraea maritima
UP000252234	2183983	2949	Pusillimonas sp. EA3	Bacteria	Proteobacteria	Betaproteobacteria	Burkholderiales	Alcaligenaceae	Pusillimonas	Pusillimonas sp. EA3
UP000240572	1434707	4946	Taibaiella chishuiensis	Bacteria	Bacteroidetes	Chitinophagia	Chitinophagales	Chitinophagaceae	Taibaiella	Taibaiella chishuiensis
UP000197065	1963835	3717	Arboricoccus pini	Bacteria	Proteobacteria	Alphaproteobacteria	Rhodospirillales	Geminicoccaceae	Arboricoccus	Arboricoccus pini
UP000317894	2593303	3247	Sandarakinorhabdus sp. LB1R16	Bacteria	Proteobacteria	Alphaproteobacteria	Sphingomonadales	Sphingomonadaceae	Sandarakinorhabdus	Sandarakinorhabdus sp. LB1R16
UP000272729	543527	8276	Saccharothrix variisporea	Bacteria	Actinobacteria	Actinobacteria	Pseudonocardiales	Pseudonocardiaceae	Saccharothrix	Saccharothrix variisporea
UP000198843	1336804	2741	Polaribacter sp. Hel1_33_78	Bacteria	Bacteroidetes	Flavobacteriia	Flavobacteriales	Flavobacteriaceae	Polaribacter	Polaribacter sp. Hel1_33_78
UP000272365	2231112	2171	Hydrogenimonas sp.	Bacteria	Proteobacteria	Epsilonproteobacteria	Campylobacterales	Hydrogenimonaceae	Hydrogenimonas	Hydrogenimonas sp.
UP000094291	197479	3403	Terasakiispira papahanaumokuakeensis	Bacteria	Proteobacteria	Gammaproteobacteria	Oceanospirillales	NaV	Terasakiispira	Terasakiispira papahanaumokuakeensis
UP000037558	284581	4402	Bacillus koreensis	Bacteria	Firmicutes	Bacilli	Bacillales	Bacillaceae	Bacillus	Bacillus koreensis
UP000199051	155974	6615	Actinokineospora terrae	Bacteria	Actinobacteria	Actinobacteria	Pseudonocardiales	Pseudonocardiaceae	Actinokineospora	Actinokineospora terrae
UP000276128	2496558	6143	Paenibacillus whitsoniae	Bacteria	Firmicutes	Bacilli	Bacillales	Paenibacillaceae	Paenibacillus	Paenibacillus whitsoniae
UP000024816	1280952	3505	Hyphomonas jannaschiana VP2	Bacteria	Proteobacteria	Alphaproteobacteria	Rhodobacterales	Hyphomonadaceae	Hyphomonas	Hyphomonas jannaschiana
UP000052137	533247	3007	Raphidiopsis brookii D9	Bacteria	Cyanobacteria	NaV	Nostocales	Aphanizomenonaceae	Raphidiopsis	Raphidiopsis brookii
UP000000799	192222	1623	Campylobacter jejuni subsp. jejuni serotype O:2 (strain ATCC 700819 / NCTC 11168)	Bacteria	Proteobacteria	Epsilonproteobacteria	Campylobacterales	Campylobacteraceae	Campylobacter	Campylobacter jejuni
UP000003157	100884	3839	Coprobacillus cateniformis	Bacteria	Firmicutes	Erysipelotrichia	Erysipelotrichales	Erysipelotrichaceae	Coprobacillus	Coprobacillus cateniformis
UP000076848	288768	5495	Bordetella ansorpii	Bacteria	Proteobacteria	Betaproteobacteria	Burkholderiales	Alcaligenaceae	Bordetella	Bordetella ansorpii
UP000198417	1608407	4262	Puniceibacterium sediminis	Bacteria	Proteobacteria	Alphaproteobacteria	Rhodobacterales	Rhodobacteraceae	Puniceibacterium	Puniceibacterium sediminis
UP000245489	591202	4947	Arcicella aurantiaca	Bacteria	Bacteroidetes	Cytophagia	Cytophagales	Cytophagaceae	Arcicella	Arcicella aurantiaca
UP000005985	795665	4855	Hydrogenophaga sp. PBC	Bacteria	Proteobacteria	Betaproteobacteria	Burkholderiales	Comamonadaceae	Hydrogenophaga	Hydrogenophaga sp. PBC
UP000000483	880072	2859	Desulfobacca acetoxidans (strain ATCC 700848 / DSM 11109 / ASRB2)	Bacteria	Proteobacteria	Deltaproteobacteria	Syntrophobacterales	Syntrophaceae	Desulfobacca	Desulfobacca acetoxidans
UP000002215	485918	7179	Chitinophaga pinensis (strain ATCC 43595 / DSM 2588 / NCIB 11800 / UQM 2034)	Bacteria	Bacteroidetes	Chitinophagia	Chitinophagales	Chitinophagaceae	Chitinophaga	Chitinophaga pinensis
UP000249746	1458358	2073	Helicobacter valdiviensis	Bacteria	Proteobacteria	Epsilonproteobacteria	Campylobacterales	Helicobacteraceae	Helicobacter	Helicobacter valdiviensis
UP000281708	2478913	3882	Marmoricola sp. 4Q3S-7	Bacteria	Actinobacteria	Actinobacteria	Propionibacteriales	Nocardioidaceae	Marmoricola	Marmoricola sp. 4Q3S-7
UP000003994	883077	1709	Schaalia turicensis ACS-279-V-Col4	Bacteria	Actinobacteria	Actinobacteria	Actinomycetales	Actinomycetaceae	Schaalia	Schaalia turicensis
UP000029097	1473546	2407	Lysinibacillus sp. BF-4	Bacteria	Firmicutes	Bacilli	Bacillales	Bacillaceae	Lysinibacillus	Lysinibacillus sp. BF-4
UP000036953	1679169	3770	Bacillus sp. FJAT-27916	Bacteria	Firmicutes	Bacilli	Bacillales	Bacillaceae	Bacillus	Bacillus sp. FJAT-27916
UP000322080	2603819	3383	Boseongicola sp. HY14	Bacteria	Proteobacteria	Alphaproteobacteria	Rhodobacterales	Rhodobacteraceae	Boseongicola	Boseongicola sp. HY14
UP000051405	1736289	3021	Chryseobacterium sp. Leaf180	Bacteria	Bacteroidetes	Flavobacteriia	Flavobacteriales	Flavobacteriaceae	Chryseobacterium	Chryseobacterium sp. Leaf180
UP000233293	382514	5353	Telmatospirillum siberiense	Bacteria	Proteobacteria	Alphaproteobacteria	Rhodospirillales	Rhodospirillaceae	Telmatospirillum	Telmatospirillum siberiense
UP000256765	1332285	1914	Helicobacter sp. MIT 99-10781	Bacteria	Proteobacteria	Epsilonproteobacteria	Campylobacterales	Helicobacteraceae	Helicobacter	Helicobacter sp. MIT 99-10781
UP000001919	446465	3062	Brachybacterium faecium (strain ATCC 43885 / DSM 4810 / NCIB 9860)	Bacteria	Actinobacteria	Actinobacteria	Micrococcales	Dermabacteraceae	Brachybacterium	Brachybacterium faecium
UP000001880	502025	6684	Haliangium ochraceum (strain DSM 14365 / JCM 11303 / SMP-2)	Bacteria	Proteobacteria	Deltaproteobacteria	Myxococcales	Kofleriaceae	Haliangium	Haliangium ochraceum
UP000017973	1408254	5188	Brevibacillus panacihumi W25	Bacteria	Firmicutes	Bacilli	Bacillales	Paenibacillaceae	Brevibacillus	Brevibacillus panacihumi
UP000192660	929705	3615	Sulfobacillus thermosulfidooxidans (strain DSM 9293 / VKM B-1269 / AT-1)	Bacteria	Firmicutes	Clostridia	Clostridiales	Clostridiales Family XVII. Incertae Sedis	Sulfobacillus	Sulfobacillus thermosulfidooxidans
UP000196778	1255698	2621	Mycetocola reblochoni REB411	Bacteria	Actinobacteria	Actinobacteria	Micrococcales	Microbacteriaceae	Mycetocola	Mycetocola reblochoni
UP000310636	2565925	6462	Cohnella sp. CC-MHH1044	Bacteria	Firmicutes	Bacilli	Bacillales	Paenibacillaceae	Cohnella	Cohnella sp. CC-MHH1044
UP000017700	104623	4305	Serratia sp. (strain ATCC 39006)	Bacteria	Proteobacteria	Gammaproteobacteria	Enterobacterales	Yersiniaceae	Serratia	Serratia sp. ATCC 39006
UP000006878	861360	3380	Glutamicibacter arilaitensis (strain DSM 16368 / CIP 108037 / IAM 15318 / JCM 13566 / Re117) (Arthrobacter arilaitensis)	Bacteria	Actinobacteria	Actinobacteria	Micrococcales	Micrococcaceae	Glutamicibacter	Glutamicibacter arilaitensis
UP000017977	1262965	1963	Ruminococcus sp. CAG:624	Bacteria	Firmicutes	Clostridia	Clostridiales	Ruminococcaceae	Ruminococcus	Ruminococcus sp. CAG:624
UP000002514	243265	4556	Photorhabdus laumondii subsp. laumondii (strain DSM 15139 / CIP 105565 / TT01)	Bacteria	Proteobacteria	Gammaproteobacteria	Enterobacterales	Morganellaceae	Photorhabdus	Photorhabdus laumondii
UP000029844	1552123	3104	Listeria booriae	Bacteria	Firmicutes	Bacilli	Bacillales	Listeriaceae	Listeria	Listeria booriae
UP000245086	1445552	3121	Candidatus Phycosocius bacilliformis	Bacteria	Proteobacteria	Alphaproteobacteria	NaV	NaV	Candidatus Phycosocius	Candidatus Phycosocius bacilliformis
UP000008220	386415	2305	Clostridium novyi (strain NT)	Bacteria	Firmicutes	Clostridia	Clostridiales	Clostridiaceae	Clostridium	Clostridium novyi
UP000005395	314266	3892	Sphingomonas sp. (strain SKA58)	Bacteria	Proteobacteria	Alphaproteobacteria	Sphingomonadales	Sphingomonadaceae	Sphingomonas	Sphingomonas sp. SKA58
UP000029223	990271	7941	Vibrio variabilis	Bacteria	Proteobacteria	Gammaproteobacteria	Vibrionales	Vibrionaceae	Vibrio	Vibrio variabilis
UP000222674	2033502	5011	Bacillus sp. AFS040349	Bacteria	Firmicutes	Bacilli	Bacillales	Bacillaceae	Bacillus	Bacillus sp. AFS040349
UP000199708	120956	1889	Facklamia miroungae	Bacteria	Firmicutes	Bacilli	Lactobacillales	Aerococcaceae	Facklamia	Facklamia miroungae
UP000218621	2005462	4751	Calothrix sp. NIES-3974	Bacteria	Cyanobacteria	NaV	Nostocales	Calotrichaceae	Calothrix	Calothrix sp. NIES-3974
UP000287609	2306976	1448	Bifidobacterium dolichotidis	Bacteria	Actinobacteria	Actinobacteria	Bifidobacteriales	Bifidobacteriaceae	Bifidobacterium	Bifidobacterium dolichotidis
UP000013015	888050	1983	Schaalia cardiffensis F0333	Bacteria	Actinobacteria	Actinobacteria	Actinomycetales	Actinomycetaceae	Schaalia	Schaalia cardiffensis
UP000221024	1469170	2920	Longimonas halophila	Bacteria	Bacteroidetes	NaV	Bacteroidetes Order II. Incertae sedis	Rhodothermaceae	Longimonas	Longimonas halophila
UP000189196	1945860	3322	Rhodanobacter sp. B04	Bacteria	Proteobacteria	Gammaproteobacteria	Xanthomonadales	Rhodanobacteraceae	Rhodanobacter	Rhodanobacter sp. B04
UP000309215	889272	9827	Polyangium fumosum	Bacteria	Proteobacteria	Deltaproteobacteria	Myxococcales	Polyangiaceae	Polyangium	Polyangium fumosum
UP000314011	2588711	3956	Rhodobacteraceae bacterium SM1903	Bacteria	Proteobacteria	Alphaproteobacteria	Rhodobacterales	Rhodobacteraceae	NaV	Rhodobacteraceae bacterium SM1903
UP000031649	1469502	2955	Burkholderiales bacterium GJ-E10	Bacteria	Proteobacteria	Betaproteobacteria	Burkholderiales	NaV	NaV	Burkholderiales bacterium GJ-E10
UP000093049	1678130	3187	Modestobacter sp. VKM Ac-2676	Bacteria	Actinobacteria	Actinobacteria	Geodermatophilales	Geodermatophilaceae	Modestobacter	Modestobacter sp. VKM Ac-2676
UP000197405	2014876	3588	Xenophilus sp. AP218F	Bacteria	Proteobacteria	Betaproteobacteria	Burkholderiales	Comamonadaceae	Xenophilus	Xenophilus sp. AP218F
UP000005853	262489	4800	delta proteobacterium MLMS-1	Bacteria	Proteobacteria	Deltaproteobacteria	NaV	NaV	NaV	delta proteobacterium MLMS-1
UP000061184	1792307	5070	Bosea sp. PAMC 26642	Bacteria	Proteobacteria	Alphaproteobacteria	Rhizobiales	Bradyrhizobiaceae	Bosea	Bosea sp. PAMC 26642
UP000257131	1940533	2966	Rhodosalinus sediminis	Bacteria	Proteobacteria	Alphaproteobacteria	Rhodobacterales	Rhodobacteraceae	Rhodosalinus	Rhodosalinus sediminis
UP000189161	1908263	2455	Rodentibacter trehalosifermentans	Bacteria	Proteobacteria	Gammaproteobacteria	Pasteurellales	Pasteurellaceae	Rodentibacter	Rodentibacter trehalosifermentans
UP000043372	1504672	4739	Polaromonas sp. CG9_12	Bacteria	Proteobacteria	Betaproteobacteria	Burkholderiales	Comamonadaceae	Polaromonas	Polaromonas sp. CG9_12
UP000028006	1027273	3948	Endozoicomonas montiporae	Bacteria	Proteobacteria	Gammaproteobacteria	Oceanospirillales	Endozoicomonadaceae	Endozoicomonas	Endozoicomonas montiporae
UP000002381	481743	6237	Geobacillus sp. (strain Y412MC10)	Bacteria	Firmicutes	Bacilli	Bacillales	Paenibacillaceae	Paenibacillus	Paenibacillus sp. Y412MC10
UP000032303	658445	4974	Photobacterium gaetbulicola Gung47	Bacteria	Proteobacteria	Gammaproteobacteria	Vibrionales	Vibrionaceae	Photobacterium	Photobacterium gaetbulicola
UP000199186	1839762	8159	Streptomyces sp. DvalAA-43	Bacteria	Actinobacteria	Actinobacteria	Streptomycetales	Streptomycetaceae	Streptomyces	Streptomyces sp. DvalAA-43
UP000004778	525246	2394	Actinomyces urogenitalis DSM 15434	Bacteria	Actinobacteria	Actinobacteria	Actinomycetales	Actinomycetaceae	Actinomyces	Actinomyces urogenitalis
UP000017148	1313304	2304	Chitinivibrio alkaliphilus ACht1	Bacteria	Fibrobacteres	Chitinivibrionia	Chitinivibrionales	Chitinivibrionaceae	Chitinivibrio	Chitinivibrio alkaliphilus
UP000199278	1520828	2888	Lachnospiraceae bacterium YSD2013	Bacteria	Firmicutes	Clostridia	Clostridiales	Lachnospiraceae	NaV	Lachnospiraceae bacterium YSD2013
UP000054396	1685382	4264	Ponticoccus marisrubri	Bacteria	Proteobacteria	Alphaproteobacteria	Rhodobacterales	Rhodobacteraceae	Ponticoccus	Ponticoccus marisrubri
UP000014923	941824	2370	Thermobrachium celere DSM 8682	Bacteria	Firmicutes	Clostridia	Clostridiales	Clostridiaceae	Thermobrachium	Thermobrachium celere
UP000199550	195913	3957	Loktanella salsilacus	Bacteria	Proteobacteria	Alphaproteobacteria	Rhodobacterales	Rhodobacteraceae	Loktanella	Loktanella salsilacus
UP000019151	861299	6261	Gemmatirosa kalamazoonesis	Bacteria	Gemmatimonadetes	Gemmatimonadetes	Gemmatimonadales	Gemmatimonadaceae	Gemmatirosa	Gemmatirosa kalamazoonesis
UP000001877	358681	5887	Brevibacillus brevis (strain 47 / JCM 6285 / NBRC 100599)	Bacteria	Firmicutes	Bacilli	Bacillales	Paenibacillaceae	Brevibacillus	Brevibacillus brevis
UP000198539	564137	4002	Roseicitreum antarcticum	Bacteria	Proteobacteria	Alphaproteobacteria	Rhodobacterales	Rhodobacteraceae	Roseicitreum	Roseicitreum antarcticum
UP000037699	1415551	6275	Streptomyces sp. WM4235	Bacteria	Actinobacteria	Actinobacteria	Streptomycetales	Streptomycetaceae	Streptomyces	Streptomyces sp. WM4235
UP000028867	1209984	7641	Mycolicibacterium mageritense DSM 44476 = CIP 104973	Bacteria	Actinobacteria	Actinobacteria	Corynebacteriales	Mycobacteriaceae	Mycolicibacterium	Mycolicibacterium mageritense
UP000298213	2555898	4021	Sphingomonas sp. 17J27-24	Bacteria	Proteobacteria	Alphaproteobacteria	Sphingomonadales	Sphingomonadaceae	Sphingomonas	Sphingomonas sp. 17J27-24
UP000028523	1394179	854	Mycoplasma iowae DK-CPA	Bacteria	Tenericutes	Mollicutes	Mycoplasmatales	Mycoplasmataceae	Mycoplasma	Mycoplasma iowae
UP000051880	1736219	3352	Sphingomonas sp. Leaf42	Bacteria	Proteobacteria	Alphaproteobacteria	Sphingomonadales	Sphingomonadaceae	Sphingomonas	Sphingomonas sp. Leaf42
UP000318483	2599296	3573	Litoreibacter sp. LN3S51	Bacteria	Proteobacteria	Alphaproteobacteria	Rhodobacterales	Rhodobacteraceae	Litoreibacter	Litoreibacter sp. LN3S51
UP000321259	2602761	2381	Mesonia sp. HuA40	Bacteria	Bacteroidetes	Flavobacteriia	Flavobacteriales	Flavobacteriaceae	Mesonia	Mesonia sp. HuA40
UP000189057	1884656	2185	Epulopiscium sp. Nuni2H_MBin001	Bacteria	Firmicutes	Clostridia	Clostridiales	Lachnospiraceae	Epulopiscium	Epulopiscium sp. Nuni2H_MBin001
UP000234881	2067669	4355	Cohaesibacter sp. H1304	Bacteria	Proteobacteria	Alphaproteobacteria	Rhizobiales	Cohaesibacteraceae	Cohaesibacter	Cohaesibacter celericrescens
UP000005953	314283	4236	Reinekea blandensis MED297	Bacteria	Proteobacteria	Gammaproteobacteria	Oceanospirillales	Saccharospirillaceae	Reinekea	Reinekea blandensis
UP000018867	1207055	4513	Sphingobium sp. C100	Bacteria	Proteobacteria	Alphaproteobacteria	Sphingomonadales	Sphingomonadaceae	Sphingobium	Sphingobium sp. C100
UP000018086	1262817	1265	Clostridium sp. CAG:524	Bacteria	Firmicutes	Clostridia	Clostridiales	Clostridiaceae	Clostridium	Clostridium sp. CAG:524
UP000031057	1348853	4270	Novosphingobium malaysiense	Bacteria	Proteobacteria	Alphaproteobacteria	Sphingomonadales	Sphingomonadaceae	Novosphingobium	Novosphingobium malaysiense
UP000196302	1940762	6085	Nostocales cyanobacterium HT-58-2	Bacteria	Cyanobacteria	NaV	Nostocales	NaV	NaV	Nostocales cyanobacterium HT-58-2
UP000317078	1854500	5879	Roseomonas nepalensis	Bacteria	Proteobacteria	Alphaproteobacteria	Rhodospirillales	Acetobacteraceae	Roseomonas	Roseomonas nepalensis
UP000282002	2494374	4119	Tabrizicola sp. K13M18	Bacteria	Proteobacteria	Alphaproteobacteria	Rhodobacterales	Rhodobacteraceae	Tabrizicola	Tabrizicola piscis
UP000005763	253839	7528	Streptomyces sp. C	Bacteria	Actinobacteria	Actinobacteria	Streptomycetales	Streptomycetaceae	Streptomyces	Streptomyces sp. C
UP000053785	1403934	844	Leuconostoc sp. DORA_2	Bacteria	Firmicutes	Bacilli	Lactobacillales	Leuconostocaceae	Leuconostoc	Leuconostoc sp. DORA_2
UP000004095	313606	8248	Microscilla marina ATCC 23134	Bacteria	Bacteroidetes	Cytophagia	Cytophagales	Microscillaceae	Microscilla	Microscilla marina
UP000000425	122586	2001	Neisseria meningitidis serogroup B (strain MC58)	Bacteria	Proteobacteria	Betaproteobacteria	Neisseriales	Neisseriaceae	Neisseria	Neisseria meningitidis
UP000037743	1519495	6101	Streptomyces sp. NRRL F-6491	Bacteria	Actinobacteria	Actinobacteria	Streptomycetales	Streptomycetaceae	Streptomyces	Streptomyces sp. NRRL F-6491
UP000280792	2528527	3340	Endozoicomonas sp. GTF13	Bacteria	Proteobacteria	Gammaproteobacteria	Oceanospirillales	Aestuariirhabdaceae	Aestuariirhabdus	Aestuariirhabdus litorea
UP000003904	744979	3622	Ahrensia sp. R2A130	Bacteria	Proteobacteria	Alphaproteobacteria	Rhodobacterales	Rhodobacteraceae	Ahrensia	Ahrensia sp. R2A130
UP000228907	1891971	3344	Gaetbulibacter sp. 4G1	Bacteria	Bacteroidetes	Flavobacteriia	Flavobacteriales	Flavobacteriaceae	Gaetbulibacter	Gaetbulibacter sp. 4G1
UP000256461	2282866	3366	Sporosarcina sp. BI001-red	Bacteria	Firmicutes	Bacilli	Bacillales	Planococcaceae	Sporosarcina	Sporosarcina sp. BI001-red
UP000198217	47857	6456	Micromonospora echinaurantiaca	Bacteria	Actinobacteria	Actinobacteria	Micromonosporales	Micromonosporaceae	Micromonospora	Micromonospora echinaurantiaca
UP000019233	765869	2854	Bdellovibrio bacteriovorus W	Bacteria	Proteobacteria	Oligoflexia	Bdellovibrionales	Bdellovibrionaceae	Bdellovibrio	Bdellovibrio bacteriovorus
UP000269198	2487137	4542	Nocardiopsaceae bacterium YIM 96095	Bacteria	Actinobacteria	Actinobacteria	Streptosporangiales	Nocardiopsaceae	NaV	Nocardiopsaceae bacterium YIM 96095
UP000249447	1605891	3120	Lysobacter maris	Bacteria	Proteobacteria	Gammaproteobacteria	Xanthomonadales	Xanthomonadaceae	Lysobacter	Lysobacter maris
UP000298358	300019	3006	Microbacterium paludicola	Bacteria	Actinobacteria	Actinobacteria	Micrococcales	Microbacteriaceae	Microbacterium	Microbacterium paludicola
UP000288096	45657	5012	Desulfonema ishimotonii	Bacteria	Proteobacteria	Deltaproteobacteria	Desulfobacterales	Desulfobacteraceae	Desulfonema	Desulfonema ishimotonii
UP000222818	1010676	194	Candidatus Tremblaya phenacola	Bacteria	Proteobacteria	Betaproteobacteria	NaV	NaV	Candidatus Tremblaya	Candidatus Tremblaya phenacola
UP000029541	1238	2947	Piscirickettsia salmonis	Bacteria	Proteobacteria	Gammaproteobacteria	Thiotrichales	Piscirickettsiaceae	Piscirickettsia	Piscirickettsia salmonis
UP000244677	1678728	3535	Flavobacterium kingsejongi	Bacteria	Bacteroidetes	Flavobacteriia	Flavobacteriales	Flavobacteriaceae	Flavobacterium	Flavobacterium kingsejongi
UP000317371	1204385	4877	Litorilinea aerophila	Bacteria	Chloroflexi	Caldilineae	Caldilineales	Caldilineaceae	Litorilinea	Litorilinea aerophila
UP000054662	45076	2614	Legionella worsleiensis	Bacteria	Proteobacteria	Gammaproteobacteria	Legionellales	Legionellaceae	Legionella	Legionella worsleiensis
UP000067626	52	8327	Chondromyces crocatus	Bacteria	Proteobacteria	Deltaproteobacteria	Myxococcales	Polyangiaceae	Chondromyces	Chondromyces crocatus
UP000093220	189873	6979	Bradyrhizobium sp. LMTR 3	Bacteria	Proteobacteria	Alphaproteobacteria	Rhizobiales	Bradyrhizobiaceae	Bradyrhizobium	Bradyrhizobium sp. LMTR 3
UP000008178	585394	3351	Roseburia hominis (strain DSM 16839 / NCIMB 14029 / A2-183)	Bacteria	Firmicutes	Clostridia	Clostridiales	Lachnospiraceae	Roseburia	Roseburia hominis
UP000008915	644966	2324	Thermaerobacter marianensis (strain ATCC 700841 / DSM 12885 / JCM 10246 / 7p75a)	Bacteria	Firmicutes	Clostridia	Clostridiales	Clostridiales Family XVII. Incertae Sedis	Thermaerobacter	Thermaerobacter marianensis
UP000275356	120377	3332	Salana multivorans	Bacteria	Actinobacteria	Actinobacteria	Micrococcales	Beutenbergiaceae	Salana	Salana multivorans
UP000000609	272624	2930	Legionella pneumophila subsp. pneumophila (strain Philadelphia 1 / ATCC 33152 / DSM 7513)	Bacteria	Proteobacteria	Gammaproteobacteria	Legionellales	Legionellaceae	Legionella	Legionella pneumophila
UP000001822	269798	3771	Cytophaga hutchinsonii (strain ATCC 33406 / NCIMB 9469)	Bacteria	Bacteroidetes	Cytophagia	Cytophagales	Cytophagaceae	Cytophaga	Cytophaga hutchinsonii
UP000032733	1288970	3700	Magnetospira sp. (strain QH-2) (Marine magnetic spirillum (strain QH-2))	Bacteria	Proteobacteria	Alphaproteobacteria	Rhodospirillales	Rhodospirillaceae	Magnetospira	Magnetospira sp. QH-2
UP000242367	1926885	5700	Actinomadura sp. 5-2	Bacteria	Actinobacteria	Actinobacteria	Streptosporangiales	Thermomonosporaceae	Actinomadura	Actinomadura sp. 5-2
UP000198774	1780378	3078	Clostridiales bacterium CHKCI001	Bacteria	Firmicutes	Clostridia	Clostridiales	NaV	NaV	Clostridiales bacterium CHKCI001
UP000317036	2163881	6695	Paenibacillus sp. JC52	Bacteria	Firmicutes	Bacilli	Bacillales	Paenibacillaceae	Paenibacillus	Paenibacillus sp. JC52
UP000076582	1803372	3730	Lewinella sp. 4G2	Bacteria	Bacteroidetes	Saprospiria	Saprospirales	Lewinellaceae	Lewinella	Lewinella sp. 4G2
UP000000625	83333	4391	Escherichia coli (strain K12)	Bacteria	Proteobacteria	Gammaproteobacteria	Enterobacterales	Enterobacteriaceae	Escherichia	Escherichia coli
UP000007487	867900	3281	Cellulophaga lytica (strain ATCC 23178 / DSM 7489 / JCM 8516 / NBRC 14961 / NCIMB 1423 / VKM B-1433 / Cy l20)	Bacteria	Bacteroidetes	Flavobacteriia	Flavobacteriales	Flavobacteriaceae	Cellulophaga	Cellulophaga lytica
UP000008221	351607	2157	Acidothermus cellulolyticus (strain ATCC 43068 / 11B)	Bacteria	Actinobacteria	Actinobacteria	Acidothermales	Acidothermaceae	Acidothermus	Acidothermus cellulolyticus
UP000051970	1736550	3422	Aeromicrobium sp. Root495	Bacteria	Actinobacteria	Actinobacteria	Propionibacteriales	Nocardioidaceae	Aeromicrobium	Aeromicrobium sp. Root495
UP000295124	190195	8290	Kribbella antibiotica	Bacteria	Actinobacteria	Actinobacteria	Propionibacteriales	Nocardioidaceae	Kribbella	Kribbella antibiotica
UP000185062	1131553	2414	Nitrosomonas cryotolerans ATCC 49181	Bacteria	Proteobacteria	Betaproteobacteria	Nitrosomonadales	Nitrosomonadaceae	Nitrosomonas	Nitrosomonas cryotolerans
UP000018078	1262936	2055	Prevotella sp. CAG:873	Bacteria	Bacteroidetes	Bacteroidia	Bacteroidales	Prevotellaceae	Prevotella	Prevotella sp. CAG:873
UP000007809	675635	6620	Pseudonocardia dioxanivorans (strain ATCC 55486 / DSM 44775 / JCM 13855 / CB1190)	Bacteria	Actinobacteria	Actinobacteria	Pseudonocardiales	Pseudonocardiaceae	Pseudonocardia	Pseudonocardia dioxanivorans
UP000278332	36746	4753	Pseudomonas cichorii	Bacteria	Proteobacteria	Gammaproteobacteria	Pseudomonadales	Pseudomonadaceae	Pseudomonas	Pseudomonas cichorii
UP000062973	1068978	7005	Amycolatopsis methanolica 239	Bacteria	Actinobacteria	Actinobacteria	Pseudonocardiales	Pseudonocardiaceae	Amycolatopsis	Amycolatopsis methanolica
UP000008878	203124	4342	Trichodesmium erythraeum (strain IMS101)	Bacteria	Cyanobacteria	NaV	Oscillatoriales	Microcoleaceae	Trichodesmium	Trichodesmium erythraeum
UP000260680	759821	5501	Clostridium sp. PI-S10-A1B	Bacteria	Firmicutes	Clostridia	Clostridiales	Clostridiaceae	Clostridium	Clostridium indicum
UP000022447	1449350	4304	Roseivivax halodurans JCM 10272	Bacteria	Proteobacteria	Alphaproteobacteria	Rhodobacterales	Rhodobacteraceae	Roseivivax	Roseivivax halodurans
UP000062160	224999	2299	Tepidanaerobacter syntrophicus	Bacteria	Firmicutes	Clostridia	Thermoanaerobacterales	Thermoanaerobacteraceae	Tepidanaerobacter	Tepidanaerobacter syntrophicus
UP000228535	1121954	4905	Hymenobacter chitinivorans DSM 11115	Bacteria	Bacteroidetes	Cytophagia	Cytophagales	Hymenobacteraceae	Hymenobacter	Hymenobacter chitinivorans
UP000075359	1630136	2316	Sulfurovum riftiae	Bacteria	Proteobacteria	Epsilonproteobacteria	NaV	NaV	Sulfurovum	Sulfurovum riftiae
UP000242949	1612202	2406	Pelagirhabdus alkalitolerans	Bacteria	Firmicutes	Bacilli	Bacillales	Bacillaceae	Pelagirhabdus	Pelagirhabdus alkalitolerans
UP000236893	2079460	3780	Solitalea longa	Bacteria	Bacteroidetes	Sphingobacteriia	Sphingobacteriales	Sphingobacteriaceae	Solitalea	Solitalea longa
UP000236726	28051	2518	Lachnospira multipara	Bacteria	Firmicutes	Clostridia	Clostridiales	Lachnospiraceae	Lachnospira	Lachnospira multipara
UP000198654	119000	3825	Halomonas muralis	Bacteria	Proteobacteria	Gammaproteobacteria	Oceanospirillales	Halomonadaceae	Halomonas	Halomonas muralis
UP000030150	1515613	1412	Porphyromonas sp. COT-239 OH1446	Bacteria	Bacteroidetes	Bacteroidia	Bacteroidales	Porphyromonadaceae	Porphyromonas	Porphyromonas sp. COT-239 OH1446
UP000006190	883113	1527	Facklamia languida CCUG 37842	Bacteria	Firmicutes	Bacilli	Lactobacillales	Aerococcaceae	Facklamia	Facklamia languida
UP000249384	280772	5290	methanotrophic bacterial endosymbiont of Bathymodiolus sp.	Bacteria	Proteobacteria	Gammaproteobacteria	NaV	NaV	NaV	methanotrophic bacterial endosymbiont of Bathymodiolus sp.
UP000186218	1344003	4105	Williamsia sterculiae	Bacteria	Actinobacteria	Actinobacteria	Corynebacteriales	Nocardiaceae	Williamsia	Williamsia sterculiae
UP000276103	447716	5168	Trichormus variabilis SAG 1403-4b	Bacteria	Cyanobacteria	NaV	Nostocales	Nostocaceae	Trichormus	Trichormus variabilis
UP000280903	2268461	3036	Microbacterium sp. ABRD_28	Bacteria	Actinobacteria	Actinobacteria	Micrococcales	Microbacteriaceae	Microbacterium	Microbacterium sp. ABRD_28
UP000182108	876478	2181	Tepidiphilus thermophilus	Bacteria	Proteobacteria	Hydrogenophilalia	Hydrogenophilales	Hydrogenophilaceae	Tepidiphilus	Tepidiphilus thermophilus
UP000289269	2506947	639	bacterium AMD01	Bacteria	NaV	NaV	NaV	NaV	NaV	bacterium AMD01
UP000236438	2035433	485	bacterium HR38	Bacteria	NaV	NaV	NaV	NaV	NaV	bacterium HR38
UP000033070	1188319	2668	Ferriphaselus amnicola	Bacteria	Proteobacteria	Betaproteobacteria	Nitrosomonadales	Gallionellaceae	Ferriphaselus	Ferriphaselus amnicola
UP000092598	1915	8567	Streptomyces lincolnensis	Bacteria	Actinobacteria	Actinobacteria	Streptomycetales	Streptomycetaceae	Streptomyces	Streptomyces lincolnensis
UP000242765	1977882	2794	Acinetobacter sp. ANC 4999	Bacteria	Proteobacteria	Gammaproteobacteria	Pseudomonadales	Moraxellaceae	Acinetobacter	Acinetobacter sp. ANC 4999
UP000002012	522772	2901	Denitrovibrio acetiphilus (strain DSM 12809 / N2460)	Bacteria	Deferribacteres	Deferribacteres	Deferribacterales	Deferribacteraceae	Denitrovibrio	Denitrovibrio acetiphilus
UP000018357	1262938	2225	Prevotella sp. CAG:924	Bacteria	Bacteroidetes	Bacteroidia	Bacteroidales	Prevotellaceae	Prevotella	Prevotella sp. CAG:924
UP000198758	1881040	6483	Chitinophaga sp. YR573	Bacteria	Bacteroidetes	Chitinophagia	Chitinophagales	Chitinophagaceae	Chitinophaga	Chitinophaga sp. YR573
UP000192761	1121001	4303	Andreprevotia lacus DSM 23236	Bacteria	Proteobacteria	Betaproteobacteria	Neisseriales	Chromobacteriaceae	Andreprevotia	Andreprevotia lacus
UP000000644	365044	4879	Polaromonas naphthalenivorans (strain CJ2)	Bacteria	Proteobacteria	Betaproteobacteria	Burkholderiales	Comamonadaceae	Polaromonas	Polaromonas naphthalenivorans
UP000015216	669502	372	Candidatus Profftella armatura	Bacteria	Proteobacteria	Betaproteobacteria	NaV	NaV	Candidatus Profftella	Candidatus Profftella armatura
UP000214646	1908690	10212	Fimbriiglobus ruber	Bacteria	Planctomycetes	Planctomycetia	Gemmatales	Gemmataceae	Fimbriiglobus	Fimbriiglobus ruber
UP000051274	1736475	4609	Nocardioides sp. Root151	Bacteria	Actinobacteria	Actinobacteria	Propionibacteriales	Nocardioidaceae	Nocardioides	Nocardioides sp. Root151
UP000027341	28885	2330	Hydrogenovibrio marinus	Bacteria	Proteobacteria	Gammaproteobacteria	Thiotrichales	Piscirickettsiaceae	Hydrogenovibrio	Hydrogenovibrio marinus
UP000297737	2511025	3035	Polymorphobacter sp. DJ1R-1	Bacteria	Proteobacteria	Alphaproteobacteria	Sphingomonadales	Sphingomonadaceae	Polymorphobacter	Polymorphobacter arshaanensis
UP000030416	1384049	3553	Lysinibacillus manganicus DSM 26584	Bacteria	Firmicutes	Bacilli	Bacillales	Bacillaceae	Lysinibacillus	Lysinibacillus manganicus
UP000270342	2419776	5622	Robbsia sp. DHC34	Bacteria	Proteobacteria	Betaproteobacteria	Burkholderiales	Burkholderiaceae	Pararobbsia	Pararobbsia silviterrae
UP000248856	78229	4779	Acidovorax anthurii	Bacteria	Proteobacteria	Betaproteobacteria	Burkholderiales	Comamonadaceae	Acidovorax	Acidovorax anthurii
UP000295455	264023	3991	Mariniflexile fucanivorans	Bacteria	Bacteroidetes	Flavobacteriia	Flavobacteriales	Flavobacteriaceae	Mariniflexile	Mariniflexile fucanivorans
UP000092212	1834076	3346	Mycobacterium sp. 1274756.6	Bacteria	Actinobacteria	Actinobacteria	Corynebacteriales	Mycobacteriaceae	Mycobacterium	Mycobacterium sp. 1274756.6
UP000014211	1235798	5824	Dorea sp. 5-2	Bacteria	Firmicutes	Clostridia	Clostridiales	Lachnospiraceae	Dorea	Dorea sp. 5-2
UP000273595	2022746	4064	Erwinia sp. 198	Bacteria	Proteobacteria	Gammaproteobacteria	Enterobacterales	Erwiniaceae	Erwinia	Erwinia sp. 198
UP000018403	1263029	1175	Firmicutes bacterium CAG:552	Bacteria	Firmicutes	NaV	NaV	NaV	NaV	Firmicutes bacterium CAG:552
UP000275232	2488860	2690	Erythrobacter sp. HN-E23	Bacteria	Proteobacteria	Alphaproteobacteria	Sphingomonadales	Erythrobacteraceae	Erythrobacter	Erythrobacter sp. HN-E23
UP000029644	221126	4609	Algibacter lectus	Bacteria	Bacteroidetes	Flavobacteriia	Flavobacteriales	Flavobacteriaceae	Algibacter	Algibacter lectus
UP000315006	1898978	2772	Hymenobacter sp.	Bacteria	Bacteroidetes	Cytophagia	Cytophagales	Hymenobacteraceae	Hymenobacter	Hymenobacter sp.
UP000215303	70258	2389	Staphylococcus piscifermentans	Bacteria	Firmicutes	Bacilli	Bacillales	Staphylococcaceae	Staphylococcus	Staphylococcus piscifermentans
UP000295418	2545760	4798	Paenibacillus sp. 18JY21-1	Bacteria	Firmicutes	Bacilli	Bacillales	Paenibacillaceae	Paenibacillus	Paenibacillus sp. 18JY21-1
UP000198584	571932	4309	Thalassobacillus cyri	Bacteria	Firmicutes	Bacilli	Bacillales	Bacillaceae	Thalassobacillus	Thalassobacillus cyri
UP000287243	1930593	1851	Vampirococcus sp. LiM	Bacteria	NaV	NaV	NaV	NaV	Vampirococcus	Vampirococcus sp. LiM
UP000008718	694427	3020	Paludibacter propionicigenes (strain DSM 17365 / JCM 13257 / WB4)	Bacteria	Bacteroidetes	Bacteroidia	Bacteroidales	Paludibacteraceae	Paludibacter	Paludibacter propionicigenes
UP000275368	1712516	6378	Paenibacillus baekrokdamisoli	Bacteria	Firmicutes	Bacilli	Bacillales	Paenibacillaceae	Paenibacillus	Paenibacillus baekrokdamisoli
UP000321954	2585771	2941	Antarcticibacterium sp. PAMC 28998	Bacteria	Bacteroidetes	Flavobacteriia	Flavobacteriales	Flavobacteriaceae	Antarcticibacterium	Antarcticibacterium sp. PAMC 28998
UP000251891	2231787	6713	Actinomadura sp. LHW63021	Bacteria	Actinobacteria	Actinobacteria	Streptosporangiales	Thermomonosporaceae	Actinomadura	Actinomadura sp. LHW63021
UP000249803	1487952	1273	Mesotoga sp. SC_4PWA21	Bacteria	Thermotogae	Thermotogae	Kosmotogales	Kosmotogaceae	Mesotoga	Mesotoga sp. SC_4PWA21
UP000029493	157783	4020	Pseudomonas cremoricolorata	Bacteria	Proteobacteria	Gammaproteobacteria	Pseudomonadales	Pseudomonadaceae	Pseudomonas	Pseudomonas cremoricolorata
UP000061382	512763	4108	Rufibacter tibetensis	Bacteria	Bacteroidetes	Cytophagia	Cytophagales	Hymenobacteraceae	Rufibacter	Rufibacter tibetensis
UP000199476	321763	2587	Halarsenatibacter silvermanii	Bacteria	Firmicutes	Clostridia	Halanaerobiales	Halanaerobiaceae	Halarsenatibacter	Halarsenatibacter silvermanii
UP000029736	1524460	5064	Phaeodactylibacter xiamenensis	Bacteria	Bacteroidetes	Saprospiria	Saprospirales	Haliscomenobacteraceae	Phaeodactylibacter	Phaeodactylibacter xiamenensis
UP000293400	1977087	5266	Proteobacteria bacterium	Bacteria	Proteobacteria	NaV	NaV	NaV	NaV	Proteobacteria bacterium
UP000231564	1349785	2844	Tenacibaculum maritimum NCIMB 2154	Bacteria	Bacteroidetes	Flavobacteriia	Flavobacteriales	Flavobacteriaceae	Tenacibaculum	Tenacibaculum maritimum
UP000014117	1235799	4125	Lachnospiraceae bacterium MD308	Bacteria	Firmicutes	Clostridia	Clostridiales	Lachnospiraceae	NaV	Lachnospiraceae bacterium MD308
UP000005258	1110502	5778	Tistrella mobilis (strain KA081020-065)	Bacteria	Proteobacteria	Alphaproteobacteria	Rhodospirillales	Rhodospirillaceae	Tistrella	Tistrella mobilis
UP000077519	398843	4877	Rhodococcus kyotonensis	Bacteria	Actinobacteria	Actinobacteria	Corynebacteriales	Nocardiaceae	Rhodococcus	Rhodococcus kyotonensis
UP000216446	716817	3669	Rubricoccus marinus	Bacteria	Rhodothermaeota	Rhodothermia	Rhodothermales	Rubricoccaceae	Rubricoccus	Rubricoccus marinus
UP000320314	2590452	3546	Pararhizobium sp. BGMRC6574	Bacteria	Proteobacteria	Alphaproteobacteria	Rhizobiales	Rhizobiaceae	Pararhizobium	Pararhizobium sp. BGMRC6574
UP000215244	1178778	4004	Maribacter cobaltidurans	Bacteria	Bacteroidetes	Flavobacteriia	Flavobacteriales	Flavobacteriaceae	Maribacter	Maribacter cobaltidurans
UP000018877	1131730	5084	Bacillus vireti LMG 21834	Bacteria	Firmicutes	Bacilli	Bacillales	Bacillaceae	Bacillus	Bacillus vireti
UP000292155	1871071	4276	Comamonadaceae bacterium	Bacteria	Proteobacteria	Betaproteobacteria	Burkholderiales	Comamonadaceae	NaV	Comamonadaceae bacterium
UP000294192	1937190	986	Mycoplasma marinum	Bacteria	Tenericutes	Mollicutes	Mycoplasmatales	Mycoplasmataceae	Mycoplasma	Mycoplasma marinum
UP000031972	220754	3729	Jeotgalibacillus campisalis	Bacteria	Firmicutes	Bacilli	Bacillales	Planococcaceae	Jeotgalibacillus	Jeotgalibacillus campisalis
UP000318709	2558361	1664	Swingsia sp. F3b2	Bacteria	Proteobacteria	Alphaproteobacteria	Rhodospirillales	Acetobacteraceae	Swingsia	Swingsia sp. F3b2
UP000245429	2201181	2952	Flavobacterium sediminis	Bacteria	Bacteroidetes	Flavobacteriia	Flavobacteriales	Flavobacteriaceae	Flavobacterium	Flavobacterium sediminis
UP000008183	243274	1852	Thermotoga maritima (strain ATCC 43589 / MSB8 / DSM 3109 / JCM 10099)	Bacteria	Thermotogae	Thermotogae	Thermotogales	Thermotogaceae	Thermotoga	Thermotoga maritima
UP000009159	350058	5902	Mycolicibacterium vanbaalenii (strain DSM 7251 / JCM 13017 / NRRL B-24157 / PYR-1) (Mycobacterium vanbaalenii)	Bacteria	Actinobacteria	Actinobacteria	Corynebacteriales	Mycobacteriaceae	Mycolicibacterium	Mycolicibacterium vanbaalenii
UP000051178	1736370	3084	Sphingomonas sp. Leaf412	Bacteria	Proteobacteria	Alphaproteobacteria	Sphingomonadales	Sphingomonadaceae	Sphingomonas	Sphingomonas sp. Leaf412
UP000003533	422288	1437	Beggiatoa sp. SS	Bacteria	Proteobacteria	Gammaproteobacteria	Thiotrichales	Thiotrichaceae	Beggiatoa	Beggiatoa sp. SS
UP000272464	2496267	4013	Paenibacillus sp. 3-5-3	Bacteria	Firmicutes	Bacilli	Bacillales	Paenibacillaceae	Paenibacillus	Paenibacillus sp. 3-5-3
UP000218332	1484056	3136	Tamilnaduibacter salinus	Bacteria	Proteobacteria	Gammaproteobacteria	Alteromonadales	Alteromonadaceae	Tamilnaduibacter	Tamilnaduibacter salinus
UP000280915	2320122	2759	bacterium J10(2018)	Bacteria	NaV	NaV	NaV	NaV	NaV	bacterium J10(2018)
UP000001807	224326	1290	Borrelia burgdorferi (strain ATCC 35210 / B31 / CIP 102532 / DSM 4680)	Bacteria	Spirochaetes	Spirochaetia	Spirochaetales	Borreliaceae	Borreliella	Borreliella burgdorferi
UP000198520	285351	2643	Sanguibacter marinus	Bacteria	Actinobacteria	Actinobacteria	Micrococcales	Sanguibacteraceae	Sanguibacter	Sanguibacter marinus
UP000198643	1792306	2493	Lachnospiraceae bacterium C7	Bacteria	Firmicutes	Clostridia	Clostridiales	Lachnospiraceae	NaV	Lachnospiraceae bacterium C7
UP000092640	1834205	2448	Burkholderiales bacterium YL45	Bacteria	Proteobacteria	Betaproteobacteria	Burkholderiales	NaV	NaV	Burkholderiales bacterium YL45
UP000029734	268407	4821	Paenibacillus wynnii	Bacteria	Firmicutes	Bacilli	Bacillales	Paenibacillaceae	Paenibacillus	Paenibacillus wynnii
UP000321094	57032	3473	Polaribacter sp. IC066	Bacteria	Bacteroidetes	Flavobacteriia	Flavobacteriales	Flavobacteriaceae	Polaribacter	Polaribacter sp. IC066
UP000196836	243899	1674	endosymbiont 'TC1' of Trimyema compressum	Bacteria	Firmicutes	NaV	NaV	NaV	NaV	endosymbiont 'TC1' of Trimyema compressum
UP000242588	2137199	2568	Marinobacter sp. Z-F4-2	Bacteria	Proteobacteria	Gammaproteobacteria	Alteromonadales	Alteromonadaceae	Marinobacter	Marinobacter sp. Z-F4-2
UP000017951	1262800	1500	Clostridium sp. CAG:356	Bacteria	Firmicutes	Clostridia	Clostridiales	Clostridiaceae	Clostridium	Clostridium sp. CAG:356
UP000216024	1478221	4258	Anaeromicrobium sediminis	Bacteria	Firmicutes	Clostridia	Clostridiales	Clostridiaceae	Anaeromicrobium	Anaeromicrobium sediminis
UP000056090	589873	3445	Alteromonas australica	Bacteria	Proteobacteria	Gammaproteobacteria	Alteromonadales	Alteromonadaceae	Alteromonas	Alteromonas australica
UP000185663	545619	2637	Paraoerskovia marina	Bacteria	Actinobacteria	Actinobacteria	Micrococcales	Cellulomonadaceae	Paraoerskovia	Paraoerskovia marina
UP000193963	396013	4205	Pseudooceanicola marinus	Bacteria	Proteobacteria	Alphaproteobacteria	Rhodobacterales	Rhodobacteraceae	Pseudooceanicola	Pseudooceanicola marinus
UP000276170	2218522	135	Candidatus Termititenax spirochaetophilus	Bacteria	Candidatus Margulisbacteria	Candidatus Termititenacia	Candidatus Termititenacales	Candidatus Termititenacaceae	Candidatus Termititenax	Candidatus Termititenax spirochaetophilus
UP000228506	1100707	3143	Limnohabitans sp. B9-3	Bacteria	Proteobacteria	Betaproteobacteria	Burkholderiales	Comamonadaceae	Limnohabitans	Limnohabitans sp. B9-3
UP000006380	360105	1860	Campylobacter curvus (strain 525.92)	Bacteria	Proteobacteria	Epsilonproteobacteria	Campylobacterales	Campylobacteraceae	Campylobacter	Campylobacter curvus
UP000001351	378806	8307	Stigmatella aurantiaca (strain DW4/3-1)	Bacteria	Proteobacteria	Deltaproteobacteria	Myxococcales	Archangiaceae	Stigmatella	Stigmatella aurantiaca
UP000276542	2321396	3217	Nocardioides sp. K1W22B-1	Bacteria	Actinobacteria	Actinobacteria	Propionibacteriales	Nocardioidaceae	Nocardioides	Nocardioides sp. K1W22B-1
UP000216978	2015568	3916	Burkholderiales bacterium PBB6	Bacteria	Proteobacteria	Betaproteobacteria	Burkholderiales	NaV	NaV	Burkholderiales bacterium PBB6
UP000198901	563176	4964	Siphonobacter aquaeclarae	Bacteria	Bacteroidetes	Cytophagia	Cytophagales	Cytophagaceae	Siphonobacter	Siphonobacter aquaeclarae
UP000028602	1005995	3337	Tatumella ptyseos ATCC 33301	Bacteria	Proteobacteria	Gammaproteobacteria	Enterobacterales	Erwiniaceae	Tatumella	Tatumella ptyseos
UP000245845	1544	5138	Faecalicatena orotica	Bacteria	Firmicutes	Clostridia	Clostridiales	Lachnospiraceae	Faecalicatena	Faecalicatena orotica
UP000252071	2267226	3376	Psychromonas sp. B3M02	Bacteria	Proteobacteria	Gammaproteobacteria	Alteromonadales	Psychromonadaceae	Psychromonas	Psychromonas sp. B3M02
UP000289135	2488809	3458	Verrucomicrobia bacterium S94	Bacteria	Verrucomicrobia	NaV	NaV	NaV	NaV	Verrucomicrobia bacterium S94
UP000095197	1048380	4633	Fusibacter sp. 3D3	Bacteria	Firmicutes	Clostridia	Clostridiales	Clostridiales Family XII. Incertae Sedis	Fusibacter	Fusibacter sp. 3D3
UP000234329	187490	2792	Acidithiobacillus sp. SH	Bacteria	Proteobacteria	Acidithiobacillia	Acidithiobacillales	Acidithiobacillaceae	Acidithiobacillus	Acidithiobacillus sp. SH
UP000295383	2512149	7471	Rhizobium sp. BK376	Bacteria	Proteobacteria	Alphaproteobacteria	Rhizobiales	Rhizobiaceae	Rhizobium	Rhizobium sp. BK376
UP000029380	1302649	2607	Tetragenococcus muriaticus PMC-11-5	Bacteria	Firmicutes	Bacilli	Lactobacillales	Enterococcaceae	Tetragenococcus	Tetragenococcus muriaticus
UP000285517	2494375	3051	Aequorivita sp. H23M31	Bacteria	Bacteroidetes	Flavobacteriia	Flavobacteriales	Flavobacteriaceae	Aequorivita	Aequorivita sp. H23M31
UP000275719	2488728	3128	Flavobacterium sp. YIM 102701-2	Bacteria	Bacteroidetes	Flavobacteriia	Flavobacteriales	Flavobacteriaceae	Flavobacterium	Flavobacterium tangerina
UP000250434	1804986	8085	Amycolatopsis albispora	Bacteria	Actinobacteria	Actinobacteria	Pseudonocardiales	Pseudonocardiaceae	Amycolatopsis	Amycolatopsis albispora
UP000216605	2022802	2995	Flavobacterium cyanobacteriorum	Bacteria	Bacteroidetes	Flavobacteriia	Flavobacteriales	Flavobacteriaceae	Flavobacterium	Flavobacterium cyanobacteriorum
UP000317998	1162970	2633	Homoserinimonas aerilata	Bacteria	Actinobacteria	Actinobacteria	Micrococcales	Microbacteriaceae	Homoserinimonas	Homoserinimonas aerilata
UP000033750	1264554	505	Mycoplasma meleagridis ATCC 25294	Bacteria	Tenericutes	Mollicutes	Mycoplasmatales	Mycoplasmataceae	Mycoplasma	Mycoplasma meleagridis
UP000031275	510955	2087	Chryseobacterium solincola	Bacteria	Bacteroidetes	Flavobacteriia	Flavobacteriales	Flavobacteriaceae	Chryseobacterium	Chryseobacterium solincola
UP000194798	1570016	3187	Thioflexothrix psekupsii	Bacteria	Proteobacteria	Gammaproteobacteria	Thiotrichales	NaV	Thioflexothrix	Thioflexothrix psekupsii
UP000021369	1341156	3322	Ruminococcus albus SY3	Bacteria	Firmicutes	Clostridia	Clostridiales	Ruminococcaceae	Ruminococcus	Ruminococcus albus
UP000216176	2015558	3021	Flavobacterium sp. BFFFF2	Bacteria	Bacteroidetes	Flavobacteriia	Flavobacteriales	Flavobacteriaceae	Flavobacterium	Flavobacterium sp. BFFFF2
UP000290889	2507538	2593	Muriicola sp. MMS17-SY002	Bacteria	Bacteroidetes	Flavobacteriia	Flavobacteriales	Flavobacteriaceae	Muriicola	Muriicola sp. MMS17-SY002
UP000011131	1278073	8043	Myxococcus stipitatus (strain DSM 14675 / JCM 12634 / Mx s8)	Bacteria	Proteobacteria	Deltaproteobacteria	Myxococcales	Myxococcaceae	Myxococcus	Myxococcus stipitatus
UP000000640	196162	4888	Nocardioides sp. (strain ATCC BAA-499 / JS614)	Bacteria	Actinobacteria	Actinobacteria	Propionibacteriales	Nocardioidaceae	Nocardioides	Nocardioides sp. JS614
UP000092631	1796613	3692	Bacteroides caecimuris	Bacteria	Bacteroidetes	Bacteroidia	Bacteroidales	Bacteroidaceae	Bacteroides	Bacteroides caecimuris
UP000199087	1499688	5269	Bacillus sp. LF1	Bacteria	Firmicutes	Bacilli	Bacillales	Bacillaceae	Bacillus	Bacillus sp. LF1
UP000070542	1588754	1608	Veillonellaceae bacterium DNF00626	Bacteria	Firmicutes	Negativicutes	Veillonellales	Veillonellaceae	NaV	Veillonellaceae bacterium DNF00626
UP000002432	204669	4771	Koribacter versatilis (strain Ellin345)	Bacteria	Acidobacteria	Acidobacteriia	Acidobacteriales	Acidobacteriaceae	Candidatus Koribacter	Candidatus Koribacter versatilis
UP000268016	2480588	4017	Histidinibacterium lentulum	Bacteria	Proteobacteria	Alphaproteobacteria	Rhodobacterales	Rhodobacteraceae	Histidinibacterium	Histidinibacterium lentulum
UP000316313	1293412	1984	Swingsia samuiensis	Bacteria	Proteobacteria	Alphaproteobacteria	Rhodospirillales	Acetobacteraceae	Swingsia	Swingsia samuiensis
UP000275473	1848460	3216	Planococcus salinus	Bacteria	Firmicutes	Bacilli	Bacillales	Planococcaceae	Planococcus	Planococcus salinus
UP000265955	2320863	5690	Herbaspirillum sp. K1R23-30	Bacteria	Proteobacteria	Betaproteobacteria	Burkholderiales	Oxalobacteraceae	Herbaspirillum	Herbaspirillum sp. K1R23-30
UP000018262	1262873	2206	Dorea sp. CAG:317	Bacteria	Firmicutes	Clostridia	Clostridiales	Lachnospiraceae	Dorea	Dorea sp. CAG:317
UP000033682	303541	1508	Lactobacillus apis	Bacteria	Firmicutes	Bacilli	Lactobacillales	Lactobacillaceae	Lactobacillus	Lactobacillus apis
UP000288967	2501295	2958	Dyella sp. M7H15-1	Bacteria	Proteobacteria	Gammaproteobacteria	Xanthomonadales	Rhodanobacteraceae	Dyella	Dyella sp. M7H15-1
UP000016509	1226325	6954	Clostridium sp. KLE 1755	Bacteria	Firmicutes	Clostridia	Clostridiales	Clostridiaceae	Clostridium	Clostridium sp. KLE 1755
UP000249688	990373	4650	Humitalea rosea	Bacteria	Proteobacteria	Alphaproteobacteria	Rhodospirillales	Acetobacteraceae	Humitalea	Humitalea rosea
UP000244912	1501240	4308	Palleronia abyssalis	Bacteria	Proteobacteria	Alphaproteobacteria	Rhodobacterales	Rhodobacteraceae	Palleronia	Palleronia abyssalis
UP000194577	1937003	2185	Actinomyces sp. CtC 72	Bacteria	Actinobacteria	Actinobacteria	Actinomycetales	Actinomycetaceae	Actinomyces	Actinomyces sp. CtC 72
UP000198973	1776045	2977	Clostridium sp. C105KSO13	Bacteria	Firmicutes	Clostridia	Clostridiales	Clostridiaceae	Clostridium	Clostridium sp. C105KSO13
UP000030970	1217052	5224	Ralstonia sp. A12	Bacteria	Proteobacteria	Betaproteobacteria	Burkholderiales	Burkholderiaceae	Ralstonia	Ralstonia sp. A12
UP000256708	1400979	5237	Pontibacter diazotrophicus	Bacteria	Bacteroidetes	Cytophagia	Cytophagales	Hymenobacteraceae	Pontibacter	Pontibacter diazotrophicus
UP000199662	84035	3963	Propionispira arboris	Bacteria	Firmicutes	Negativicutes	Selenomonadales	Selenomonadaceae	Propionispira	Propionispira arboris
UP000007113	682795	4804	Granulicella mallensis (strain ATCC BAA-1857 / DSM 23137 / MP5ACTX8)	Bacteria	Acidobacteria	Acidobacteriia	Acidobacteriales	Acidobacteriaceae	Granulicella	Granulicella mallensis
UP000195424	1965642	2620	Flavonifractor sp. An52	Bacteria	Firmicutes	Clostridia	Clostridiales	Ruminococcaceae	Flavonifractor	Flavonifractor sp. An52
UP000017907	1262753	2231	Bacteroides sp. CAG:927	Bacteria	Bacteroidetes	Bacteroidia	Bacteroidales	Bacteroidaceae	Bacteroides	Bacteroides sp. CAG:927
UP000030004	1461694	4202	Pseudooceanicola atlanticus	Bacteria	Proteobacteria	Alphaproteobacteria	Rhodobacterales	Rhodobacteraceae	Pseudooceanicola	Pseudooceanicola atlanticus
UP000000245	349163	3521	Acidiphilium cryptum (strain JF-5)	Bacteria	Proteobacteria	Alphaproteobacteria	Rhodospirillales	Acetobacteraceae	Acidiphilium	Acidiphilium cryptum
UP000239425	1082868	1546	Holospora curviuscula	Bacteria	Proteobacteria	Alphaproteobacteria	Holosporales	Holosporaceae	Holospora	Holospora curviuscula
UP000004291	411684	4185	Hoeflea phototrophica (strain DSM 17068 / NCIMB 14078 / DFL-43)	Bacteria	Proteobacteria	Alphaproteobacteria	Rhizobiales	Phyllobacteriaceae	Hoeflea	Hoeflea phototrophica
UP000017915	1380770	5132	Streptomycetaceae bacterium MP113-05	Bacteria	Actinobacteria	Actinobacteria	Streptomycetales	Streptomycetaceae	NaV	Streptomycetaceae bacterium MP113-05
UP000003280	862517	1987	Peptoniphilus duerdenii ATCC BAA-1640	Bacteria	Firmicutes	Tissierellia	Tissierellales	Peptoniphilaceae	Peptoniphilus	Peptoniphilus duerdenii
UP000198828	1123352	2998	Tepidimicrobium xylanilyticum	Bacteria	Firmicutes	Tissierellia	Tissierellales	Tissierellaceae	Tepidimicrobium	Tepidimicrobium xylanilyticum
UP000032117	1504156	4595	Microbacterium sp. SUBG005	Bacteria	Actinobacteria	Actinobacteria	Micrococcales	Microbacteriaceae	Microbacterium	Microbacterium sp. SUBG005
UP000001422	84588	2512	Synechococcus sp. (strain WH8102)	Bacteria	Cyanobacteria	NaV	Synechococcales	Synechococcaceae	Synechococcus	Synechococcus sp. WH 8102
UP000188617	1933778	8733	Saccharothrix sp. ALI-22-I	Bacteria	Actinobacteria	Actinobacteria	Pseudonocardiales	Pseudonocardiaceae	Saccharothrix	Saccharothrix sp. ALI-22-I
UP000245624	178340	3941	Gracilibacillus dipsosauri	Bacteria	Firmicutes	Bacilli	Bacillales	Bacillaceae	Gracilibacillus	Gracilibacillus dipsosauri
UP000094652	394958	2948	Clostridium taeniosporum	Bacteria	Firmicutes	Clostridia	Clostridiales	Clostridiaceae	Clostridium	Clostridium taeniosporum
UP000092623	1743142	6340	Bacillus sp. FJAT-26390	Bacteria	Firmicutes	Bacilli	Bacillales	Bacillaceae	Bacillus	Bacillus sp. FJAT-26390
UP000199073	91360	4348	Desulforhopalus singaporensis	Bacteria	Proteobacteria	Deltaproteobacteria	Desulfobacterales	Desulfobulbaceae	Desulforhopalus	Desulforhopalus singaporensis
UP000184452	758803	6204	Nocardiopsis flavescens	Bacteria	Actinobacteria	Actinobacteria	Streptosporangiales	Nocardiopsaceae	Nocardiopsis	Nocardiopsis flavescens
UP000182360	163	3051	Treponema bryantii	Bacteria	Spirochaetes	Spirochaetia	Spirochaetales	Spirochaetaceae	Treponema	Treponema bryantii
UP000245168	2135793	2648	Marinicauda sp. WD6-1	Bacteria	Proteobacteria	Alphaproteobacteria	Rhodobacterales	Hyphomonadaceae	Marinicauda	Marinicauda sp. WD6-1
UP000266993	2486471	2513	Muribaculaceae bacterium Isolate-104 (HZI)	Bacteria	Bacteroidetes	Bacteroidia	Bacteroidales	Muribaculaceae	NaV	Muribaculaceae bacterium Isolate-104 (HZI)
UP000285023	2315689	2311	Sphingomonas edaphi	Bacteria	Proteobacteria	Alphaproteobacteria	Sphingomonadales	Sphingomonadaceae	Sphingomonas	Sphingomonas edaphi
UP000193431	331648	2989	Nonlabens spongiae	Bacteria	Bacteroidetes	Flavobacteriia	Flavobacteriales	Flavobacteriaceae	Nonlabens	Nonlabens spongiae
UP000036395	47884	4299	Pseudomonas taetrolens	Bacteria	Proteobacteria	Gammaproteobacteria	Pseudomonadales	Pseudomonadaceae	Pseudomonas	Pseudomonas taetrolens
UP000003730	1046627	2926	Bizionia argentinensis JUB59	Bacteria	Bacteroidetes	Flavobacteriia	Flavobacteriales	Flavobacteriaceae	Bizionia	Bizionia argentinensis
UP000031501	1355015	6158	Streptomyces pluripotens	Bacteria	Actinobacteria	Actinobacteria	Streptomycetales	Streptomycetaceae	Streptomyces	Streptomyces pluripotens
UP000005947	525256	1243	Atopobium vaginae DSM 15829	Bacteria	Actinobacteria	Coriobacteriia	Coriobacteriales	Atopobiaceae	Atopobium	Atopobium vaginae
UP000244519	1802984	720	Candidatus Fokinia solitaria	Bacteria	Proteobacteria	Alphaproteobacteria	Rickettsiales	Candidatus Midichloriaceae	Candidatus Fokinia	Candidatus Fokinia solitaria
UP000320239	1867	7203	Actinoplanes teichomyceticus	Bacteria	Actinobacteria	Actinobacteria	Micromonosporales	Micromonosporaceae	Actinoplanes	Actinoplanes teichomyceticus
UP000187851	75293	7686	Streptomyces autolyticus	Bacteria	Actinobacteria	Actinobacteria	Streptomycetales	Streptomycetaceae	Streptomyces	Streptomyces autolyticus
UP000075374	1121305	2406	Clostridium colicanis DSM 13634	Bacteria	Firmicutes	Clostridia	Clostridiales	Clostridiaceae	Clostridium	Clostridium colicanis
UP000198384	1109740	3391	Lutibacter agarilyticus	Bacteria	Bacteroidetes	Flavobacteriia	Flavobacteriales	Flavobacteriaceae	Lutibacter	Lutibacter agarilyticus
UP000286773	564710	2675	Vagococcus acidifermentans	Bacteria	Firmicutes	Bacilli	Lactobacillales	Enterococcaceae	Vagococcus	Vagococcus acidifermentans
UP000237752	1629062	4340	Antricoccus suffuscus	Bacteria	Actinobacteria	Actinobacteria	Frankiales	NaV	Antricoccus	Antricoccus suffuscus
UP000009223	545694	3512	Treponema primitia (strain ATCC BAA-887 / DSM 12427 / ZAS-2)	Bacteria	Spirochaetes	Spirochaetia	Spirochaetales	Spirochaetaceae	Treponema	Treponema primitia
UP000189777	526729	4296	Krasilnikoviella flava	Bacteria	Actinobacteria	Actinobacteria	Micrococcales	Promicromonosporaceae	Krasilnikoviella	Krasilnikoviella flava
UP000001629	153948	2841	Nitrosomonas sp. AL212	Bacteria	Proteobacteria	Betaproteobacteria	Nitrosomonadales	Nitrosomonadaceae	Nitrosomonas	Nitrosomonas sp. AL212
UP000295066	1005740	2990	Aminivibrio pyruvatiphilus	Bacteria	Synergistetes	Synergistia	Synergistales	Synergistaceae	Aminivibrio	Aminivibrio pyruvatiphilus
UP000293289	33879	3588	Agromyces ramosus	Bacteria	Actinobacteria	Actinobacteria	Micrococcales	Microbacteriaceae	Agromyces	Agromyces ramosus
UP000000329	757424	4732	Herbaspirillum seropedicae (strain SmR1)	Bacteria	Proteobacteria	Betaproteobacteria	Burkholderiales	Oxalobacteraceae	Herbaspirillum	Herbaspirillum seropedicae
UP000275256	2479848	3179	Tessaracoccus antarcticus	Bacteria	Actinobacteria	Actinobacteria	Propionibacteriales	Propionibacteriaceae	Tessaracoccus	Tessaracoccus antarcticus
UP000001408	189518	3676	Leptospira interrogans serogroup Icterohaemorrhagiae serovar Lai (strain 56601)	Bacteria	Spirochaetes	Spirochaetia	Leptospirales	Leptospiraceae	Leptospira	Leptospira interrogans
UP000018341	1262690	2085	Acinetobacter sp. CAG:196	Bacteria	Proteobacteria	Gammaproteobacteria	Pseudomonadales	Moraxellaceae	Acinetobacter	Acinetobacter sp. CAG:196
UP000193792	1974213	1979	Prosthecochloris sp. HL-130-GSB	Bacteria	Chlorobi	Chlorobia	Chlorobiales	Chlorobiaceae	Prosthecochloris	Prosthecochloris sp. HL-130-GSB
UP000199134	645273	2923	Prevotella sp. BP1-145	Bacteria	Bacteroidetes	Bacteroidia	Bacteroidales	Prevotellaceae	Prevotella	Prevotella sp. BP1-145
UP000237543	2025587	4133	Enterobacterales bacterium CwR94	Bacteria	Proteobacteria	Gammaproteobacteria	Enterobacterales	NaV	NaV	Enterobacterales bacterium CwR94
UP000243542	76022	5941	Amycolatopsis sulphurea	Bacteria	Actinobacteria	Actinobacteria	Pseudonocardiales	Pseudonocardiaceae	Amycolatopsis	Amycolatopsis sulphurea
UP000054698	453	3273	Legionella feeleii	Bacteria	Proteobacteria	Gammaproteobacteria	Legionellales	Legionellaceae	Legionella	Legionella feeleii
UP000219439	372072	4776	Cohaesibacter gelatinilyticus	Bacteria	Proteobacteria	Alphaproteobacteria	Rhizobiales	Cohaesibacteraceae	Cohaesibacter	Cohaesibacter gelatinilyticus
UP000242951	1090375	1736	Candidatus Burkholderia pumila	Bacteria	Proteobacteria	Betaproteobacteria	Burkholderiales	Burkholderiaceae	Burkholderia	Candidatus Burkholderia pumila
UP000292639	2211397	3666	Pseudomonadaceae bacterium P17C	Bacteria	Proteobacteria	Gammaproteobacteria	Pseudomonadales	Pseudomonadaceae	NaV	Pseudomonadaceae bacterium P17C
UP000006334	1127673	4327	Aliiglaciecola lipolytica E3	Bacteria	Proteobacteria	Gammaproteobacteria	Alteromonadales	Alteromonadaceae	Aliiglaciecola	Aliiglaciecola lipolytica
UP000007374	1231190	4821	Nitratireductor indicus C115	Bacteria	Proteobacteria	Alphaproteobacteria	Rhizobiales	Phyllobacteriaceae	Nitratireductor	Nitratireductor indicus
UP000004793	511051	1566	Caldisericum exile (strain DSM 21853 / NBRC 104410 / AZM16c01)	Bacteria	Caldiserica	Caldisericia	Caldisericales	Caldisericaceae	Caldisericum	Caldisericum exile
UP000075531	1121338	2724	Clostridium tepidiprofundi DSM 19306	Bacteria	Firmicutes	Clostridia	Clostridiales	Clostridiaceae	Clostridium	Clostridium tepidiprofundi
UP000008720	643867	3748	Marivirga tractuosa (strain ATCC 23168 / DSM 4126 / NBRC 15989 / NCIMB 1408 / VKM B-1430 / H-43) (Microscilla tractuosa) (Flexibacter tractuosus)	Bacteria	Bacteroidetes	Cytophagia	Cytophagales	Flammeovirgaceae	Marivirga	Marivirga tractuosa
UP000036449	1187852	5746	Methylobacterium tarhaniae	Bacteria	Proteobacteria	Alphaproteobacteria	Rhizobiales	Methylobacteriaceae	Methylobacterium	Methylobacterium tarhaniae
UP000283479	2487364	3281	Rhodococcus sp. LHW51113	Bacteria	Actinobacteria	Actinobacteria	Corynebacteriales	Nocardiaceae	Rhodococcus	Rhodococcus sp. LHW51113
UP000018150	1262979	2586	Tannerella sp. CAG:51	Bacteria	Bacteroidetes	Bacteroidia	Bacteroidales	Tannerellaceae	Tannerella	Tannerella sp. CAG:51
UP000245793	46507	1626	[Bacteroides] coagulans	Bacteria	Firmicutes	Tissierellia	NaV	NaV	NaV	[Bacteroides] coagulans
UP000216496	1548123	3054	Pusillimonas sp. T2	Bacteria	Proteobacteria	Betaproteobacteria	Burkholderiales	Alcaligenaceae	Pusillimonas	Pusillimonas sp. T2
UP000034895	1632859	3329	Arsukibacterium sp. MJ3	Bacteria	Proteobacteria	Gammaproteobacteria	Chromatiales	Chromatiaceae	Arsukibacterium	Arsukibacterium sp. MJ3
UP000050488	1544413	2252	Corynebacterium lowii	Bacteria	Actinobacteria	Actinobacteria	Corynebacteriales	Corynebacteriaceae	Corynebacterium	Corynebacterium lowii
UP000187735	1891926	6466	Fuerstia marisgermanicae	Bacteria	Planctomycetes	Planctomycetia	Planctomycetales	Planctomycetaceae	Fuerstia	Fuerstia marisgermanicae
UP000017916	1262743	2776	Bacteroides sp. CAG:598	Bacteria	Bacteroidetes	Bacteroidia	Bacteroidales	Bacteroidaceae	Bacteroides	Bacteroides sp. CAG:598
UP000309454	747645	1821	Parvibacter caecicola	Bacteria	Actinobacteria	Coriobacteriia	Coriobacteriales	Coriobacteriaceae	Parvibacter	Parvibacter caecicola
UP000037890	1523417	3974	Bosea sp. AAP35	Bacteria	Proteobacteria	Alphaproteobacteria	Rhizobiales	Bradyrhizobiaceae	Bosea	Bosea sp. AAP35
UP000243274	2137200	201	Marinobacter sp. Z-D5-3	Bacteria	Proteobacteria	Gammaproteobacteria	Alteromonadales	Alteromonadaceae	Marinobacter	Marinobacter sp. Z-D5-3
UP000293567	2026800	5527	Verrucomicrobiaceae bacterium	Bacteria	Verrucomicrobia	Verrucomicrobiae	Verrucomicrobiales	Verrucomicrobiaceae	NaV	Verrucomicrobiaceae bacterium
UP000186795	714067	3484	Kroppenstedtia eburnea	Bacteria	Firmicutes	Bacilli	Bacillales	Thermoactinomycetaceae	Kroppenstedtia	Kroppenstedtia eburnea
UP000305398	2502781	4100	Hymenobacter sp. 17J68-5	Bacteria	Bacteroidetes	Cytophagia	Cytophagales	Hymenobacteraceae	Hymenobacter	Hymenobacter jejuensis
UP000191200	519472	1935	Vagococcus teuberi	Bacteria	Firmicutes	Bacilli	Lactobacillales	Enterococcaceae	Vagococcus	Vagococcus teuberi
UP000236221	2035416	1558	bacterium HR21	Bacteria	NaV	NaV	NaV	NaV	NaV	bacterium HR21
UP000286287	2320857	4078	Deinococcus sp. K2S05-167	Bacteria	Deinococcus-Thermus	Deinococci	Deinococcales	Deinococcaceae	Deinococcus	Deinococcus sp. K2S05-167
UP000050662	1527298	632	SAR11 cluster bacterium PRT-SC02	Bacteria	Proteobacteria	Alphaproteobacteria	Pelagibacterales	Pelagibacteraceae	NaV	SAR11 cluster bacterium PRT-SC02
UP000294599	634155	2887	Pseudofulvimonas gallinarii	Bacteria	Proteobacteria	Gammaproteobacteria	Xanthomonadales	Rhodanobacteraceae	Pseudofulvimonas	Pseudofulvimonas gallinarii
UP000070560	1621989	2473	Candidatus Desulfofervidus auxilii	Bacteria	Proteobacteria	Deltaproteobacteria	NaV	Candidatus Desulfofervidaceae	Candidatus Desulfofervidus	Candidatus Desulfofervidus auxilii
UP000030595	1211035	3499	Lysinibacillus massiliensis 4400831 = CIP 108448 = CCUG 49529	Bacteria	Firmicutes	Bacilli	Bacillales	Bacillaceae	Lysinibacillus	Lysinibacillus massiliensis
UP000005835	742823	2327	Sutterella wadsworthensis 2_1_59BFAA	Bacteria	Proteobacteria	Betaproteobacteria	Burkholderiales	Sutterellaceae	Sutterella	Sutterella wadsworthensis
UP000000235	369723	4522	Salinispora tropica (strain ATCC BAA-916 / DSM 44818 / CNB-440)	Bacteria	Actinobacteria	Actinobacteria	Micromonosporales	Micromonosporaceae	Salinispora	Salinispora tropica
UP000291444	2545632	2946	Rheinheimera sp. D18	Bacteria	Proteobacteria	Gammaproteobacteria	Chromatiales	Chromatiaceae	Rheinheimera	Rheinheimera sp. D18
UP000029713	1522368	3847	Modestobacter caceresii	Bacteria	Actinobacteria	Actinobacteria	Geodermatophilales	Geodermatophilaceae	Modestobacter	Modestobacter caceresii
UP000014115	740709	2673	Idiomarina xiamenensis 10-D-4	Bacteria	Proteobacteria	Gammaproteobacteria	Alteromonadales	Idiomarinaceae	Idiomarina	Idiomarina xiamenensis
UP000054352	1526735	3143	Vogesella sp. EB	Bacteria	Proteobacteria	Betaproteobacteria	Neisseriales	Chromobacteriaceae	Vogesella	Vogesella sp. EB
UP000006461	477641	5435	Modestobacter marinus	Bacteria	Actinobacteria	Actinobacteria	Geodermatophilales	Geodermatophilaceae	Modestobacter	Modestobacter marinus
UP000019229	743966	579	Mycoplasma bovoculi M165/69	Bacteria	Tenericutes	Mollicutes	Mycoplasmatales	Mycoplasmataceae	Mycoplasma	Mycoplasma bovoculi
UP000093512	1697043	4617	Bordetella sp. H567	Bacteria	Proteobacteria	Betaproteobacteria	Burkholderiales	Alcaligenaceae	Bordetella	Bordetella sp. H567
UP000092616	34059	1904	Moraxella atlantae	Bacteria	Proteobacteria	Gammaproteobacteria	Pseudomonadales	Moraxellaceae	Moraxella	Moraxella atlantae
UP000292881	1817495	3584	Agromyces binzhouensis	Bacteria	Actinobacteria	Actinobacteria	Micrococcales	Microbacteriaceae	Agromyces	Agromyces binzhouensis
UP000005778	879212	3396	Desulfobacter postgatei 2ac9	Bacteria	Proteobacteria	Deltaproteobacteria	Desulfobacterales	Desulfobacteraceae	Desulfobacter	Desulfobacter postgatei
UP000002964	631362	4691	Thiorhodovibrio sp. 970	Bacteria	Proteobacteria	Gammaproteobacteria	Chromatiales	Chromatiaceae	Thiorhodovibrio	Thiorhodovibrio sp. 970
UP000244867	2133958	4242	Nocardioides currus	Bacteria	Actinobacteria	Actinobacteria	Propionibacteriales	Nocardioidaceae	Nocardioides	Nocardioides currus
UP000183974	337701	4424	Roseovarius pacificus	Bacteria	Proteobacteria	Alphaproteobacteria	Rhodobacterales	Rhodobacteraceae	Roseovarius	Roseovarius pacificus
UP000076574	943830	5721	Tardiphaga robiniae	Bacteria	Proteobacteria	Alphaproteobacteria	Rhizobiales	Bradyrhizobiaceae	Tardiphaga	Tardiphaga robiniae
UP000078486	1184151	4993	Opitutaceae bacterium TSB47	Bacteria	Verrucomicrobia	Opitutae	Opitutales	Opitutaceae	NaV	Opitutaceae bacterium TSB47
UP000195981	47847	2675	Brachybacterium nesterenkovii	Bacteria	Actinobacteria	Actinobacteria	Micrococcales	Dermabacteraceae	Brachybacterium	Brachybacterium nesterenkovii
UP000222233	1510841	1608	Parasaccharibacter apium	Bacteria	Proteobacteria	Alphaproteobacteria	Rhodospirillales	Acetobacteraceae	Parasaccharibacter	Parasaccharibacter apium
UP000018045	1262821	1211	Clostridium sp. CAG:568	Bacteria	Firmicutes	Clostridia	Clostridiales	Clostridiaceae	Clostridium	Clostridium sp. CAG:568
UP000310227	2562283	4153	Sinimarinibacterium sp. CAU 1509	Bacteria	Proteobacteria	Gammaproteobacteria	Nevskiales	Sinobacteraceae	Sinimarinibacterium	Sinimarinibacterium sp. CAU 1509
UP000008204	41431	4335	Rippkaea orientalis (strain PCC 8801) (Cyanothece sp. (strain PCC 8801))	Bacteria	Cyanobacteria	NaV	Chroococcales	Aphanothecaceae	Rippkaea	Rippkaea orientalis
UP000004690	926559	3783	Joostella marina DSM 19592	Bacteria	Bacteroidetes	Flavobacteriia	Flavobacteriales	Flavobacteriaceae	Joostella	Joostella marina
UP000094501	1774968	2710	Methyloceanibacter methanicus	Bacteria	Proteobacteria	Alphaproteobacteria	Rhizobiales	NaV	Methyloceanibacter	Methyloceanibacter methanicus
UP000325303	1907412	4181	Rhizobium sp. RU20A	Bacteria	Proteobacteria	Alphaproteobacteria	Rhizobiales	Rhizobiaceae	Rhizobium	Rhizobium sp. RU20A
UP000070250	465721	2956	Steroidobacter denitrificans	Bacteria	Proteobacteria	Gammaproteobacteria	Nevskiales	Steroidobacteraceae	Steroidobacter	Steroidobacter denitrificans
UP000006833	398580	4086	Dinoroseobacter shibae (strain DSM 16493 / NCIMB 14021 / DFL 12)	Bacteria	Proteobacteria	Alphaproteobacteria	Rhodobacterales	Rhodobacteraceae	Dinoroseobacter	Dinoroseobacter shibae
UP000215757	2015573	3514	Cytophagaceae bacterium BCCC1	Bacteria	Bacteroidetes	Cytophagia	Cytophagales	Cytophagaceae	NaV	Cytophagaceae bacterium BCCC1
UP000184212	947013	6790	Chryseolinea serpens	Bacteria	Bacteroidetes	Cytophagia	Cytophagales	NaV	Chryseolinea	Chryseolinea serpens
UP000050501	229921	3080	Levilinea saccharolytica	Bacteria	Chloroflexi	Anaerolineae	Anaerolineales	Anaerolineaceae	Levilinea	Levilinea saccharolytica
UP000015854	1234876	2310	Lactococcus lactis subsp. cremoris TIFN6	Bacteria	Firmicutes	Bacilli	Lactobacillales	Streptococcaceae	Lactococcus	Lactococcus lactis
UP000030149	1107311	2848	Flavobacterium enshiense DK69	Bacteria	Bacteroidetes	Flavobacteriia	Flavobacteriales	Flavobacteriaceae	Flavobacterium	Flavobacterium enshiense
UP000250241	172042	2797	Rothia aeria	Bacteria	Actinobacteria	Actinobacteria	Micrococcales	Micrococcaceae	Rothia	Rothia aeria
UP000094168	1842540	3549	Methyloversatilis sp. RAC08	Bacteria	Proteobacteria	Betaproteobacteria	Nitrosomonadales	Sterolibacteriaceae	Methyloversatilis	Methyloversatilis sp. RAC08
UP000265560	2320867	4303	Pseudomonas sp. K2W31S-8	Bacteria	Proteobacteria	Gammaproteobacteria	Pseudomonadales	Pseudomonadaceae	Pseudomonas	Pseudomonas sp. K2W31S-8
UP000004731	388401	3636	Rhodobacteraceae bacterium HTCC2150	Bacteria	Proteobacteria	Alphaproteobacteria	Rhodobacterales	Rhodobacteraceae	NaV	Rhodobacteraceae bacterium HTCC2150
UP000010445	1035195	2823	Corynebacterium durum F0235	Bacteria	Actinobacteria	Actinobacteria	Corynebacteriales	Corynebacteriaceae	Corynebacterium	Corynebacterium durum
UP000290545	2508721	4638	Filimonas sp. TTM-71	Bacteria	Bacteroidetes	Chitinophagia	Chitinophagales	Chitinophagaceae	Filimonas	Filimonas sp. TTM-71
UP000007030	869210	2194	Marinithermus hydrothermalis (strain DSM 14884 / JCM 11576 / T1)	Bacteria	Deinococcus-Thermus	Deinococci	Thermales	Thermaceae	Marinithermus	Marinithermus hydrothermalis
UP000247423	2026735	2307	Deltaproteobacteria bacterium	Bacteria	Proteobacteria	Deltaproteobacteria	NaV	NaV	NaV	Deltaproteobacteria bacterium
UP000295444	598644	7717	Labedaea rhizosphaerae	Bacteria	Actinobacteria	Actinobacteria	Pseudonocardiales	Pseudonocardiaceae	Labedaea	Labedaea rhizosphaerae
UP000013785	1158610	3510	Enterococcus phoeniculicola ATCC BAA-412	Bacteria	Firmicutes	Bacilli	Lactobacillales	Enterococcaceae	Enterococcus	Enterococcus phoeniculicola
UP000035579	48	10110	Archangium gephyra	Bacteria	Proteobacteria	Deltaproteobacteria	Myxococcales	Archangiaceae	Archangium	Archangium gephyra
UP000289856	2507935	6200	Cohnella abietis	Bacteria	Firmicutes	Bacilli	Bacillales	Paenibacillaceae	Cohnella	Cohnella abietis
UP000214746	1977292	3922	Paenibacillus xerothermodurans	Bacteria	Firmicutes	Bacilli	Bacillales	Paenibacillaceae	Paenibacillus	Paenibacillus xerothermodurans
UP000005444	701521	1877	Pediococcus claussenii (strain ATCC BAA-344 / DSM 14800 / JCM 18046 / KCTC 3811 / P06)	Bacteria	Firmicutes	Bacilli	Lactobacillales	Lactobacillaceae	Pediococcus	Pediococcus claussenii
UP000001332	864702	4673	Oscillatoriales cyanobacterium JSC-12	Bacteria	Cyanobacteria	NaV	Oscillatoriales	NaV	NaV	Oscillatoriales cyanobacterium JSC-12
UP000006743	557723	2002	Haemophilus parasuis serovar 5 (strain SH0165) (Glaesserella parasuis)	Bacteria	Proteobacteria	Gammaproteobacteria	Pasteurellales	Pasteurellaceae	Glaesserella	Glaesserella parasuis
UP000294702	203482	2076	Volucribacter psittacicida	Bacteria	Proteobacteria	Gammaproteobacteria	Pasteurellales	Pasteurellaceae	Volucribacter	Volucribacter psittacicida
UP000018303	1262804	1291	Clostridium sp. CAG:417	Bacteria	Firmicutes	Clostridia	Clostridiales	Clostridiaceae	Clostridium	Clostridium sp. CAG:417
UP000004344	372787	4557	Fischerella thermalis	Bacteria	Cyanobacteria	NaV	Nostocales	Hapalosiphonaceae	Fischerella	Fischerella thermalis
UP000182486	56427	6851	Couchioplanes caeruleus subsp. caeruleus	Bacteria	Actinobacteria	Actinobacteria	Micromonosporales	Micromonosporaceae	Couchioplanes	Couchioplanes caeruleus
UP000198697	82805	3677	Hymenobacter actinosclerus	Bacteria	Bacteroidetes	Cytophagia	Cytophagales	Hymenobacteraceae	Hymenobacter	Hymenobacter actinosclerus
UP000003856	573060	4890	Acidovorax delafieldii 2AN	Bacteria	Proteobacteria	Betaproteobacteria	Burkholderiales	Comamonadaceae	Acidovorax	Acidovorax delafieldii
UP000321479	398053	4731	Mucilaginibacter ginsenosidivorans	Bacteria	Bacteroidetes	Sphingobacteriia	Sphingobacteriales	Sphingobacteriaceae	Mucilaginibacter	Mucilaginibacter ginsenosidivorans
UP000247792	401470	5704	Undibacterium pigrum	Bacteria	Proteobacteria	Betaproteobacteria	Burkholderiales	Oxalobacteraceae	Undibacterium	Undibacterium pigrum
UP000004830	742742	2204	Collinsella tanakaei YIT 12063	Bacteria	Actinobacteria	Coriobacteriia	Coriobacteriales	Coriobacteriaceae	Collinsella	Collinsella tanakaei
UP000321949	1213358	2750	Microbacterium saccharophilum	Bacteria	Actinobacteria	Actinobacteria	Micrococcales	Microbacteriaceae	Microbacterium	Microbacterium saccharophilum
UP000003688	320771	6492	Pedosphaera parvula (strain Ellin514)	Bacteria	Verrucomicrobia	Verrucomicrobiae	Verrucomicrobiales	Verrucomicrobia subdivision 3	Pedosphaera	Pedosphaera parvula
UP000050911	1302272	2470	Lactobacillus kimchicus JCM 15530	Bacteria	Firmicutes	Bacilli	Lactobacillales	Lactobacillaceae	Lactobacillus	Lactobacillus kimchicus
UP000239406	215580	3542	Schlegelella thermodepolymerans	Bacteria	Proteobacteria	Betaproteobacteria	Burkholderiales	Comamonadaceae	Schlegelella	Schlegelella thermodepolymerans
UP000191257	147645	4275	Paracoccus yeei	Bacteria	Proteobacteria	Alphaproteobacteria	Rhodobacterales	Rhodobacteraceae	Paracoccus	Paracoccus yeei
UP000244240	1242148	3716	Melghirimyces profundicolus	Bacteria	Firmicutes	Bacilli	Bacillales	Thermoactinomycetaceae	Melghirimyces	Melghirimyces profundicolus
UP000003257	391624	4147	Sulfitobacter indolifex HEL-45	Bacteria	Proteobacteria	Alphaproteobacteria	Rhodobacterales	Rhodobacteraceae	Sulfitobacter	Sulfitobacter indolifex
UP000018289	1262977	1632	Sutterella sp. CAG:521	Bacteria	Proteobacteria	Betaproteobacteria	Burkholderiales	Sutterellaceae	Sutterella	Sutterella sp. CAG:521
UP000051013	887896	1715	Lactobacillus coleohominis DSM 14060	Bacteria	Firmicutes	Bacilli	Lactobacillales	Lactobacillaceae	Lactobacillus	Lactobacillus coleohominis
UP000243719	1770053	4543	Burkholderia sp. JS23	Bacteria	Proteobacteria	Betaproteobacteria	Burkholderiales	Burkholderiaceae	Burkholderia	Burkholderia sp. JS23
UP000001116	266940	4674	Kineococcus radiotolerans (strain ATCC BAA-149 / DSM 14245 / SRS30216)	Bacteria	Actinobacteria	Actinobacteria	Kineosporiales	Kineosporiaceae	Kineococcus	Kineococcus radiotolerans
UP000018241	1262974	1970	Succinatimonas sp. CAG:777	Bacteria	Proteobacteria	Gammaproteobacteria	Aeromonadales	Succinivibrionaceae	Succinatimonas	Succinatimonas sp. CAG:777
UP000308705	2575442	7514	Herbidospora galbida	Bacteria	Actinobacteria	Actinobacteria	Streptosporangiales	Streptosporangiaceae	Herbidospora	Herbidospora galbida
UP000268166	2479849	4804	Pseudomonas sp. v388	Bacteria	Proteobacteria	Gammaproteobacteria	Pseudomonadales	Pseudomonadaceae	Pseudomonas	Pseudomonas sp. v388
UP000053161	1403933	870	Veillonella sp. DORA_B_18_19_23	Bacteria	Firmicutes	Negativicutes	Veillonellales	Veillonellaceae	Veillonella	Veillonella sp. DORA_B_18_19_23
UP000298313	1259157	3130	Cryobacterium sp. Hh4	Bacteria	Actinobacteria	Actinobacteria	Micrococcales	Microbacteriaceae	Cryobacterium	Cryobacterium sp. Hh4
UP000198356	474952	4295	Granulicella rosea	Bacteria	Acidobacteria	Acidobacteriia	Acidobacteriales	Acidobacteriaceae	Granulicella	Granulicella rosea
UP000286268	2320868	5184	Clostridium sp. CT4	Bacteria	Firmicutes	Clostridia	Clostridiales	Clostridiaceae	Clostridium	Clostridium sp. CT4
UP000285119	2292287	3234	Blautia sp. OF03-15BH	Bacteria	Firmicutes	Clostridia	Clostridiales	Lachnospiraceae	Blautia	Blautia sp. OF03-15BH
UP000214603	683354	4867	Candidimonas nitroreducens	Bacteria	Proteobacteria	Betaproteobacteria	Burkholderiales	Alcaligenaceae	Candidimonas	Candidimonas nitroreducens
UP000266258	2028576	1522	Bisgaard taxon 44 str. B96_4	Bacteria	Proteobacteria	Gammaproteobacteria	Pasteurellales	Pasteurellaceae	NaV	Bisgaard Taxon 44
UP000244729	2080742	2774	Agromyces sp. MF30-A	Bacteria	Actinobacteria	Actinobacteria	Micrococcales	Microbacteriaceae	Agromyces	Agromyces sp. MF30-A
UP000002881	660470	2499	Mesotoga prima MesG1.Ag.4.2	Bacteria	Thermotogae	Thermotogae	Kosmotogales	Kosmotogaceae	Mesotoga	Mesotoga prima
UP000077623	432608	1109	Candidatus Mycoplasma haemobos	Bacteria	Tenericutes	Mollicutes	Mycoplasmatales	Mycoplasmataceae	Mycoplasma	Candidatus Mycoplasma haemobos
UP000236548	2035414	1704	bacterium HR19	Bacteria	NaV	NaV	NaV	NaV	NaV	bacterium HR19
UP000198893	569882	3934	Salinihabitans flavidus	Bacteria	Proteobacteria	Alphaproteobacteria	Rhodobacterales	Rhodobacteraceae	Salinihabitans	Salinihabitans flavidus
UP000095601	237258	2558	Cloacibacterium normanense	Bacteria	Bacteroidetes	Flavobacteriia	Flavobacteriales	Flavobacteriaceae	Cloacibacterium	Cloacibacterium normanense
UP000017991	1262773	2543	Clostridium sp. CAG:122	Bacteria	Firmicutes	Clostridia	Clostridiales	Clostridiaceae	Clostridium	Clostridium sp. CAG:122
UP000237298	1658742	2035	Clostridiaceae bacterium JG1575	Bacteria	Firmicutes	Clostridia	Clostridiales	Clostridiaceae	NaV	Clostridiaceae bacterium JG1575
UP000033449	1406902	3027	Salinivibrio sp. KP-1	Bacteria	Proteobacteria	Gammaproteobacteria	Vibrionales	Vibrionaceae	Salinivibrio	Salinivibrio sp. KP-1
UP000238164	75385	3901	Micropruina glycogenica	Bacteria	Actinobacteria	Actinobacteria	Propionibacteriales	Nocardioidaceae	Micropruina	Micropruina glycogenica
UP000025171	1280950	3447	Hyphomonas johnsonii MHS-2	Bacteria	Proteobacteria	Alphaproteobacteria	Rhodobacterales	Hyphomonadaceae	Hyphomonas	Hyphomonas johnsonii
UP000008961	245014	2993	butyrate-producing bacterium SS3/4	Bacteria	Firmicutes	Clostridia	Clostridiales	NaV	NaV	butyrate-producing bacterium SS3/4
UP000182427	392734	4053	Terriglobus roseus	Bacteria	Acidobacteria	Acidobacteriia	Acidobacteriales	Acidobacteriaceae	Terriglobus	Terriglobus roseus
UP000033428	1609969	2573	Candidatus Omnitrophus magneticus	Bacteria	Candidatus Omnitrophica	NaV	NaV	NaV	Candidatus Omnitrophus	Candidatus Omnitrophus magneticus
UP000001399	648757	3513	Rhodomicrobium vannielii (strain ATCC 17100 / ATH 3.1.1 / DSM 162 / LMG 4299)	Bacteria	Proteobacteria	Alphaproteobacteria	Rhizobiales	Hyphomicrobiaceae	Rhodomicrobium	Rhodomicrobium vannielii
UP000018095	1262901	1820	Fusobacterium sp. CAG:815	Bacteria	Fusobacteria	Fusobacteriia	Fusobacteriales	Fusobacteriaceae	Fusobacterium	Fusobacterium sp. CAG:815
UP000316304	2528004	5747	Planctomycetes bacterium Pla52o	Bacteria	Planctomycetes	NaV	NaV	NaV	NaV	Planctomycetes bacterium Pla52o
UP000018922	431944	4155	Magnetospirillum gryphiswaldense (strain DSM 6361 / JCM 21280 / NBRC 15271 / MSR-1)	Bacteria	Proteobacteria	Alphaproteobacteria	Rhodospirillales	Rhodospirillaceae	Magnetospirillum	Magnetospirillum gryphiswaldense
UP000035368	1050174	2448	Corynebacterium epidermidicanis	Bacteria	Actinobacteria	Actinobacteria	Corynebacteriales	Corynebacteriaceae	Corynebacterium	Corynebacterium epidermidicanis
UP000199501	1271860	6124	Alloactinosynnema iranicum	Bacteria	Actinobacteria	Actinobacteria	Pseudonocardiales	Pseudonocardiaceae	Alloactinosynnema	Alloactinosynnema iranicum
UP000005055	1034808	803	Mycoplasma anatis 1340	Bacteria	Tenericutes	Mollicutes	Mycoplasmatales	Mycoplasmataceae	Mycoplasma	Mycoplasma anatis
UP000253940	2283318	3297	Moraxellaceae bacterium HYN0046	Bacteria	Proteobacteria	Gammaproteobacteria	Pseudomonadales	Moraxellaceae	NaV	Moraxellaceae bacterium HYN0046
UP000294687	2530370	8213	Actinomadura sp. KC216	Bacteria	Actinobacteria	Actinobacteria	Streptosporangiales	Thermomonosporaceae	Actinomadura	Actinomadura sp. KC216
UP000092314	1834121	5193	Mycobacterium sp. ACS4331	Bacteria	Actinobacteria	Actinobacteria	Corynebacteriales	Mycobacteriaceae	Mycobacterium	Mycobacterium sp. ACS4331
UP000268088	1827501	5230	Mesorhizobium sp. YM1C-6-2	Bacteria	Proteobacteria	Alphaproteobacteria	Rhizobiales	Phyllobacteriaceae	Mesorhizobium	Mesorhizobium sp. YM1C-6-2
UP000001430	167546	1906	Prochlorococcus marinus (strain MIT 9301)	Bacteria	Cyanobacteria	NaV	Synechococcales	Prochloraceae	Prochlorococcus	Prochlorococcus marinus
UP000194218	1109743	5248	Streptomyces sp. SCSIO 03032	Bacteria	Actinobacteria	Actinobacteria	Streptomycetales	Streptomycetaceae	Streptomyces	Streptomyces sp. SCSIO 03032
UP000186469	1121455	2355	Desulfovibrio litoralis DSM 11393	Bacteria	Proteobacteria	Deltaproteobacteria	Desulfovibrionales	Desulfovibrionaceae	Desulfovibrio	Desulfovibrio litoralis
UP000006470	313598	2634	Polaribacter sp. MED152	Bacteria	Bacteroidetes	Flavobacteriia	Flavobacteriales	Flavobacteriaceae	Polaribacter	Polaribacter sp. MED152
UP000188748	1917019	4399	Bacillus sp. VT-16-64	Bacteria	Firmicutes	Bacilli	Bacillales	Bacillaceae	Bacillus	Bacillus sp. VT-16-64
UP000003806	885272	1508	Jonquetella anthropi DSM 22815	Bacteria	Synergistetes	Synergistia	Synergistales	Synergistaceae	Jonquetella	Jonquetella anthropi
UP000295701	2547833	3259	Primorskyibacter sp. SS33	Bacteria	Proteobacteria	Alphaproteobacteria	Rhodobacterales	Rhodobacteraceae	Primorskyibacter	Primorskyibacter sp. SS33
UP000001651	321967	2708	Lactobacillus paracasei (strain ATCC 334 / BCRC 17002 / CIP 107868 / KCTC 3260 / NRRL B-441)	Bacteria	Firmicutes	Bacilli	Lactobacillales	Lactobacillaceae	Lactobacillus	Lactobacillus paracasei
UP000284249	2292281	3052	Bacteroides sp. OF04-15BH	Bacteria	Bacteroidetes	Bacteroidia	Bacteroidales	Bacteroidaceae	Bacteroides	Bacteroides sp. OF04-15BH
UP000233343	549687	5301	Bacillus horneckiae	Bacteria	Firmicutes	Bacilli	Bacillales	Bacillaceae	Bacillus	Bacillus horneckiae
UP000070490	1588753	1709	Coriobacteriales bacterium DNF00809	Bacteria	Actinobacteria	Coriobacteriia	Coriobacteriales	NaV	NaV	Coriobacteriales bacterium DNF00809
UP000289326	142650	676	Mycoplasma phocirhinis	Bacteria	Tenericutes	Mollicutes	Mycoplasmatales	Mycoplasmataceae	Mycoplasma	Mycoplasma phocirhinis
UP000005540	432331	1670	Sulfurihydrogenibium yellowstonense SS-5	Bacteria	Aquificae	Aquificae	Aquificales	Hydrogenothermaceae	Sulfurihydrogenibium	Sulfurihydrogenibium yellowstonense
UP000018098	1262739	2710	Bacteroides sp. CAG:443	Bacteria	Bacteroidetes	Bacteroidia	Bacteroidales	Bacteroidaceae	Bacteroides	Bacteroides sp. CAG:443
UP000245623	2173179	3162	Microbacterium sp. Gd 4-13	Bacteria	Actinobacteria	Actinobacteria	Micrococcales	Microbacteriaceae	Microbacterium	Microbacterium sp. Gd 4-13
UP000018101	1262992	1718	Firmicutes bacterium CAG:83	Bacteria	Firmicutes	NaV	NaV	NaV	NaV	Firmicutes bacterium CAG:83
UP000266385	2305466	3647	Henriciella sp. JN25	Bacteria	Proteobacteria	Alphaproteobacteria	Rhodobacterales	Hyphomonadaceae	Henriciella	Henriciella sp. JN25
UP000181976	385682	3056	Thermophagus xiamenensis	Bacteria	Bacteroidetes	Bacteroidia	Marinilabiliales	Marinilabiliaceae	Thermophagus	Thermophagus xiamenensis
UP000304864	2580412	2078	Thiomicrorhabdus sp. G1	Bacteria	Proteobacteria	Gammaproteobacteria	Thiotrichales	Piscirickettsiaceae	Thiomicrorhabdus	Thiomicrorhabdus sp. G1
UP000253741	2282652	6445	Streptomyces corynorhini	Bacteria	Actinobacteria	Actinobacteria	Streptomycetales	Streptomycetaceae	Streptomyces	Streptomyces corynorhini
UP000198318	240840	7828	Actinomadura meyerae	Bacteria	Actinobacteria	Actinobacteria	Streptosporangiales	Thermomonosporaceae	Actinomadura	Actinomadura meyerae
UP000275069	2419771	3481	Gryllotalpicola sp. 2DFW10M-5	Bacteria	Actinobacteria	Actinobacteria	Micrococcales	Microbacteriaceae	Gryllotalpicola	Gryllotalpicola sp. 2DFW10M-5
UP000198983	117157	5596	Actinopolymorpha singaporensis	Bacteria	Actinobacteria	Actinobacteria	Propionibacteriales	Nocardioidaceae	Actinopolymorpha	Actinopolymorpha singaporensis
UP000051681	340021	3260	Thalassobius mediterraneus	Bacteria	Proteobacteria	Alphaproteobacteria	Rhodobacterales	Rhodobacteraceae	Thalassobius	Thalassobius mediterraneus
UP000004756	518636	6817	[Clostridium] asparagiforme DSM 15981	Bacteria	Firmicutes	Clostridia	Clostridiales	Lachnospiraceae	Enterocloster	Enterocloster asparagiformis
UP000008043	1214101	8553	Streptomyces davaonensis (strain DSM 101723 / JCM 4913 / KCC S-0913 / 768)	Bacteria	Actinobacteria	Actinobacteria	Streptomycetales	Streptomycetaceae	Streptomyces	Streptomyces davaonensis
UP000036622	1162296	4528	Klebsiella pneumoniae subsp. pneumoniae DSM 30104 = JCM 1662 = NBRC 14940	Bacteria	Proteobacteria	Gammaproteobacteria	Enterobacterales	Enterobacteriaceae	Klebsiella	Klebsiella pneumoniae
UP000078325	278959	4229	Opitutaceae bacterium TAV4	Bacteria	Verrucomicrobia	Opitutae	Opitutales	Opitutaceae	NaV	Opitutaceae bacterium TAV4
UP000029085	1121014	2685	Arenimonas donghaensis DSM 18148 = HO3-R19	Bacteria	Proteobacteria	Gammaproteobacteria	Xanthomonadales	Xanthomonadaceae	Arenimonas	Arenimonas donghaensis
UP000199004	1005944	4039	Nocardioides szechwanensis	Bacteria	Actinobacteria	Actinobacteria	Propionibacteriales	Nocardioidaceae	Nocardioides	Nocardioides szechwanensis
UP000320198	2528035	3554	Phycisphaerae bacterium RAS2	Bacteria	Planctomycetes	Phycisphaerae	NaV	NaV	NaV	Phycisphaerae bacterium RAS2
UP000268280	2485170	5117	Granulicella sp. GAS466	Bacteria	Acidobacteria	Acidobacteriia	Acidobacteriales	Acidobacteriaceae	Granulicella	Granulicella sp. GAS466
UP000183015	235985	8703	Streptacidiphilus jiangxiensis	Bacteria	Actinobacteria	Actinobacteria	Streptomycetales	Streptomycetaceae	Streptacidiphilus	Streptacidiphilus jiangxiensis
UP000248889	2219663	7437	Streptacidiphilus pinicola	Bacteria	Actinobacteria	Actinobacteria	Streptomycetales	Streptomycetaceae	Streptacidiphilus	Streptacidiphilus pinicola
UP000241229	2116701	5676	Mesorhizobium ephedrae	Bacteria	Proteobacteria	Alphaproteobacteria	Rhizobiales	Phyllobacteriaceae	Mesorhizobium	Mesorhizobium ephedrae
UP000306409	2488810	3612	Ruminiclostridium sp. MA18	Bacteria	Firmicutes	Clostridia	Clostridiales	Hungateiclostridiaceae	Ruminiclostridium	Ruminiclostridium sp. MA18
UP000016943	1348662	1870	Corynebacterium argentoratense DSM 44202	Bacteria	Actinobacteria	Actinobacteria	Corynebacteriales	Corynebacteriaceae	Corynebacterium	Corynebacterium argentoratense
UP000003178	500633	2271	[Clostridium] hiranonis DSM 13275	Bacteria	Firmicutes	Clostridia	Clostridiales	Peptostreptococcaceae	NaV	[Clostridium] hiranonis
UP000018263	1262824	2660	Clostridium sp. CAG:58	Bacteria	Firmicutes	Clostridia	Clostridiales	Clostridiaceae	Clostridium	Clostridium sp. CAG:58
UP000019050	592010	1943	Abiotrophia defectiva ATCC 49176	Bacteria	Firmicutes	Bacilli	Lactobacillales	Aerococcaceae	Abiotrophia	Abiotrophia defectiva
UP000254720	254246	2370	Aquicella lusitana	Bacteria	Proteobacteria	Gammaproteobacteria	Legionellales	Coxiellaceae	Aquicella	Aquicella lusitana
UP000002072	519441	1431	Streptobacillus moniliformis (strain ATCC 14647 / DSM 12112 / NCTC 10651 / 9901)	Bacteria	Fusobacteria	Fusobacteriia	Fusobacteriales	Leptotrichiaceae	Streptobacillus	Streptobacillus moniliformis
UP000305723	2572036	4238	Beijerinckiaceae bacterium RH AL1	Bacteria	Proteobacteria	Alphaproteobacteria	Rhizobiales	Beijerinckiaceae	NaV	Beijerinckiaceae bacterium RH AL1
UP000217895	1973484	6678	Leptolyngbya boryana NIES-2135	Bacteria	Cyanobacteria	NaV	Synechococcales	Leptolyngbyaceae	Leptolyngbya	Leptolyngbya boryana
UP000271003	2494234	2112	Sutterella megalosphaeroides	Bacteria	Proteobacteria	Betaproteobacteria	Burkholderiales	Sutterellaceae	Sutterella	Sutterella megalosphaeroides
UP000276333	2485186	2804	Cellulomonas sp. PhB143	Bacteria	Actinobacteria	Actinobacteria	Micrococcales	Cellulomonadaceae	Cellulomonas	Cellulomonas sp. PhB143
UP000005436	203275	2978	Tannerella forsythia (strain ATCC 43037 / JCM 10827 / FDC 338) (Bacteroides forsythus)	Bacteria	Bacteroidetes	Bacteroidia	Bacteroidales	Tannerellaceae	Tannerella	Tannerella forsythia
UP000186785	1921764	1617	Actinomyces liubingyangii	Bacteria	Actinobacteria	Actinobacteria	Actinomycetales	Actinomycetaceae	Actinomyces	Actinomyces liubingyangii
UP000000268	329726	8172	Acaryochloris marina (strain MBIC 11017)	Bacteria	Cyanobacteria	NaV	Synechococcales	Acaryochloridaceae	Acaryochloris	Acaryochloris marina
UP000032531	1604022	5389	Pseudomonas sp. FeS53a	Bacteria	Proteobacteria	Gammaproteobacteria	Pseudomonadales	Pseudomonadaceae	Pseudomonas	Pseudomonas sp. FeS53a
UP000295479	2541731	3677	Flavobacterium sp. AR-3-4	Bacteria	Bacteroidetes	Flavobacteriia	Flavobacteriales	Flavobacteriaceae	Flavobacterium	Flavobacterium sp. AR-3-4
UP000220922	1506545	4456	Candidatus Chloroploca asiatica	Bacteria	Chloroflexi	Chloroflexia	Chloroflexales	Oscillochloridaceae	Candidatus Chloroploca	Candidatus Chloroploca asiatica
UP000244527	1355330	3658	Flavobacterium faecale	Bacteria	Bacteroidetes	Flavobacteriia	Flavobacteriales	Flavobacteriaceae	Flavobacterium	Flavobacterium faecale
UP000183028	322505	2425	Sharpea azabuensis	Bacteria	Firmicutes	Bacilli	Lactobacillales	Lactobacillaceae	Sharpea	Sharpea azabuensis
UP000268329	1442032	6390	Streptomyces sp. Z022	Bacteria	Actinobacteria	Actinobacteria	Streptomycetales	Streptomycetaceae	Streptomyces	Streptomyces sp. Z022
UP000005275	765910	3249	Marichromatium purpuratum 984	Bacteria	Proteobacteria	Gammaproteobacteria	Chromatiales	Chromatiaceae	Marichromatium	Marichromatium purpuratum
UP000266359	2292044	2530	Eubacterium sp. AM18-10LB-B	Bacteria	Firmicutes	Clostridia	Clostridiales	Eubacteriaceae	Eubacterium	Eubacterium sp. AM18-10LB-B
UP000221734	174633	3801	Kuenenia stuttgartiensis	Bacteria	Planctomycetes	Candidatus Brocadiae	Candidatus Brocadiales	Candidatus Brocadiaceae	Candidatus Kuenenia	Candidatus Kuenenia stuttgartiensis
UP000244407	1532905	4316	Paenibacillus sp. CAA11	Bacteria	Firmicutes	Bacilli	Bacillales	Paenibacillaceae	Paenibacillus	Paenibacillus sp. CAA11
UP000190888	413434	3581	Sediminibacterium ginsengisoli	Bacteria	Bacteroidetes	Chitinophagia	Chitinophagales	Chitinophagaceae	Sediminibacterium	Sediminibacterium ginsengisoli
UP000065640	207745	7754	Variovorax sp. WDL1	Bacteria	Proteobacteria	Betaproteobacteria	Burkholderiales	Comamonadaceae	Variovorax	Variovorax sp. WDL1
UP000056576	1768242	4190	Paucibacter sp. KCTC 42545	Bacteria	Proteobacteria	Betaproteobacteria	Burkholderiales	NaV	Paucibacter	Paucibacter sp. KCTC 42545
UP000321513	670293	4800	Segetibacter aerophilus	Bacteria	Bacteroidetes	Chitinophagia	Chitinophagales	Chitinophagaceae	Segetibacter	Segetibacter aerophilus
UP000271472	572010	1842	Slackia isoflavoniconvertens	Bacteria	Actinobacteria	Coriobacteriia	Eggerthellales	Eggerthellaceae	Slackia	Slackia isoflavoniconvertens
UP000271413	260710	2385	Olavius algarvensis spirochete endosymbiont	Bacteria	Spirochaetes	Spirochaetia	Spirochaetales	NaV	NaV	Olavius algarvensis spirochete endosymbiont
UP000028323	1443103	1571	Snodgrassella alvi SCGC AB-598-O02	Bacteria	Proteobacteria	Betaproteobacteria	Neisseriales	Neisseriaceae	Snodgrassella	Snodgrassella alvi
UP000321571	2498846	3087	Aeromicrobium sp. CC-CFT486	Bacteria	Actinobacteria	Actinobacteria	Propionibacteriales	Nocardioidaceae	Aeromicrobium	Aeromicrobium sp. CC-CFT486
UP000033451	400772	2779	Microbacterium ginsengisoli	Bacteria	Actinobacteria	Actinobacteria	Micrococcales	Microbacteriaceae	Microbacterium	Microbacterium ginsengisoli
UP000253562	1031537	5042	Blastopirellula cremea	Bacteria	Planctomycetes	Planctomycetia	Pirellulales	Pirellulaceae	Blastopirellula	Blastopirellula cremea
UP000032410	1564114	5193	Rhodococcus sp. B7740	Bacteria	Actinobacteria	Actinobacteria	Corynebacteriales	Nocardiaceae	Rhodococcus	Rhodococcus sp. B7740
UP000003981	621372	4460	Paenibacillus sp. oral taxon 786 str. D14	Bacteria	Firmicutes	Bacilli	Bacillales	Paenibacillaceae	Paenibacillus	Paenibacillus sp. oral taxon 786
UP000296862	2518177	2637	Flavobacterium sangjuense	Bacteria	Bacteroidetes	Flavobacteriia	Flavobacteriales	Flavobacteriaceae	Flavobacterium	Flavobacterium sangjuense
UP000198881	574650	2759	Micrococcus terreus	Bacteria	Actinobacteria	Actinobacteria	Micrococcales	Micrococcaceae	Micrococcus	Micrococcus terreus
UP000015562	1248727	2228	endosymbiont of unidentified scaly snail isolate Monju	Bacteria	Proteobacteria	Gammaproteobacteria	NaV	NaV	NaV	endosymbiont of unidentified scaly snail isolate Monju
UP000029995	1398085	6228	Inquilinus limosus MP06	Bacteria	Proteobacteria	Alphaproteobacteria	Rhodospirillales	Rhodospirillaceae	Inquilinus	Inquilinus limosus
UP000282483	676208	1355	Candidatus Rickettsiella viridis	Bacteria	Proteobacteria	Gammaproteobacteria	Legionellales	Coxiellaceae	Rickettsiella	Candidatus Rickettsiella viridis
UP000003503	888062	1242	Dialister micraerophilus DSM 19965	Bacteria	Firmicutes	Negativicutes	Veillonellales	Veillonellaceae	Dialister	Dialister micraerophilus
UP000011740	1223523	6422	Streptomyces mobaraensis NBRC 13819 = DSM 40847	Bacteria	Actinobacteria	Actinobacteria	Streptomycetales	Streptomycetaceae	Streptomyces	Streptomyces mobaraensis
UP000190286	745368	2819	Gemmiger formicilis	Bacteria	Firmicutes	Clostridia	Clostridiales	Ruminococcaceae	Gemmiger	Gemmiger formicilis
UP000030826	370622	3519	Aureimonas altamirensis	Bacteria	Proteobacteria	Alphaproteobacteria	Rhizobiales	Aurantimonadaceae	Aureimonas	Aureimonas altamirensis
UP000006057	710421	5779	Mycobacterium chubuense (strain NBB4)	Bacteria	Actinobacteria	Actinobacteria	Corynebacteriales	Mycobacteriaceae	Mycolicibacterium	Mycolicibacterium chubuense
UP000003107	553219	2361	Campylobacter showae RM3277	Bacteria	Proteobacteria	Epsilonproteobacteria	Campylobacterales	Campylobacteraceae	Campylobacter	Campylobacter showae
UP000245992	1440053	6830	Streptomyces scopuliridis RB72	Bacteria	Actinobacteria	Actinobacteria	Streptomycetales	Streptomycetaceae	Streptomyces	Streptomyces scopuliridis
UP000199227	223786	2512	Hydrogenimonas thermophila	Bacteria	Proteobacteria	Epsilonproteobacteria	Campylobacterales	Hydrogenimonaceae	Hydrogenimonas	Hydrogenimonas thermophila
UP000284407	74349	3751	Sulfitobacter guttiformis	Bacteria	Proteobacteria	Alphaproteobacteria	Rhodobacterales	Rhodobacteraceae	Sulfitobacter	Sulfitobacter guttiformis
UP000003292	1054213	5288	Acetobacteraceae bacterium AT-5844	Bacteria	Proteobacteria	Alphaproteobacteria	Rhodospirillales	Acetobacteraceae	NaV	Acetobacteraceae bacterium AT-5844
UP000189940	29421	3500	Nitrobacter vulgaris	Bacteria	Proteobacteria	Alphaproteobacteria	Rhizobiales	Bradyrhizobiaceae	Nitrobacter	Nitrobacter vulgaris
UP000029050	218140	2122	Bifidobacterium psychraerophilum	Bacteria	Actinobacteria	Actinobacteria	Bifidobacteriales	Bifidobacteriaceae	Bifidobacterium	Bifidobacterium psychraerophilum
UP000215921	2015570	3257	Alphaproteobacteria bacterium PA2	Bacteria	Proteobacteria	Alphaproteobacteria	NaV	NaV	NaV	Alphaproteobacteria bacterium PA2
UP000004596	471870	4894	Bacteroides intestinalis DSM 17393	Bacteria	Bacteroidetes	Bacteroidia	Bacteroidales	Bacteroidaceae	Bacteroides	Bacteroides intestinalis
UP000305546	2547244	6455	Amycolatopsis alkalitolerans	Bacteria	Actinobacteria	Actinobacteria	Pseudonocardiales	Pseudonocardiaceae	Amycolatopsis	Amycolatopsis alkalitolerans
UP000053033	1766620	2012	Halothiobacillus sp. XI15	Bacteria	Proteobacteria	Gammaproteobacteria	Chromatiales	Halothiobacillaceae	Halothiobacillus	Halothiobacillus sp. XI15
UP000001401	649639	4253	Bacillus cellulosilyticus (strain ATCC 21833 / DSM 2522 / FERM P-1141 / JCM 9156 / N-4)	Bacteria	Firmicutes	Bacilli	Bacillales	Bacillaceae	Bacillus	Bacillus cellulosilyticus
UP000018269	1263002	2364	Firmicutes bacterium CAG:124	Bacteria	Firmicutes	NaV	NaV	NaV	NaV	Firmicutes bacterium CAG:124
UP000094487	1888892	3850	Sphingomonas turrisvirgatae	Bacteria	Proteobacteria	Alphaproteobacteria	Sphingomonadales	Sphingomonadaceae	Sphingomonas	Sphingomonas turrisvirgatae
UP000245126	716789	6297	Azospirillum sp. TSO22-1	Bacteria	Proteobacteria	Alphaproteobacteria	Rhodospirillales	Rhodospirillaceae	Azospirillum	Azospirillum sp. TSO22-1
UP000004097	706433	2034	Solobacterium moorei F0204	Bacteria	Firmicutes	Erysipelotrichia	Erysipelotrichales	Erysipelotrichaceae	Solobacterium	Solobacterium moorei
UP000027602	796606	3271	Bacillus methanolicus (strain MGA3 / ATCC 53907)	Bacteria	Firmicutes	Bacilli	Bacillales	Bacillaceae	Bacillus	Bacillus methanolicus
UP000027821	1048983	4341	Anditalea andensis	Bacteria	Bacteroidetes	Cytophagia	Cytophagales	Cytophagaceae	Anditalea	Anditalea andensis
UP000188822	1712379	477	Epulopiscium sp. SCG-B10WGA-EpuloA2	Bacteria	Firmicutes	Clostridia	Clostridiales	Lachnospiraceae	Epulopiscium	Epulopiscium sp. SCG-B10WGA-EpuloA2
UP000032254	686309	5591	Micromonospora haikouensis	Bacteria	Actinobacteria	Actinobacteria	Micromonosporales	Micromonosporaceae	Micromonospora	Micromonospora haikouensis
UP000010792	1125847	4603	Rhizobium sp. NT-26	Bacteria	Proteobacteria	Alphaproteobacteria	Rhizobiales	Rhizobiaceae	Rhizobium	Rhizobium sp. NT-26
UP000015748	1292036	5956	Paeniclostridium sordellii ATCC 9714	Bacteria	Firmicutes	Clostridia	Clostridiales	Peptostreptococcaceae	Paeniclostridium	Paeniclostridium sordellii
UP000070080	1497955	1471	Clostridiales bacterium KA00274	Bacteria	Firmicutes	Clostridia	Clostridiales	NaV	NaV	Clostridiales bacterium KA00274
UP000076365	1636152	5245	Planctomyces sp. SH-PL62	Bacteria	Planctomycetes	Planctomycetia	Planctomycetales	Planctomycetaceae	Planctomyces	Planctomyces sp. SH-PL62
UP000005234	767434	3098	Frateuria aurantia (strain ATCC 33424 / DSM 6220 / NBRC 3245 / NCIMB 13370) (Acetobacter aurantius)	Bacteria	Proteobacteria	Gammaproteobacteria	Xanthomonadales	Rhodanobacteraceae	Frateuria	Frateuria aurantia
UP000015857	1353529	3457	Bacteriovorax sp. BSW11_IV	Bacteria	Proteobacteria	Oligoflexia	Bacteriovoracales	Bacteriovoracaceae	Bacteriovorax	Bacteriovorax sp. BSW11_IV
UP000316225	384678	3917	Paracoccus sulfuroxidans	Bacteria	Proteobacteria	Alphaproteobacteria	Rhodobacterales	Rhodobacteraceae	Paracoccus	Paracoccus sulfuroxidans
UP000036503	1122219	2843	Megasphaera cerevisiae DSM 20462	Bacteria	Firmicutes	Negativicutes	Veillonellales	Veillonellaceae	Megasphaera	Megasphaera cerevisiae
UP000054093	710394	1136	Helicobacter suis HS5	Bacteria	Proteobacteria	Epsilonproteobacteria	Campylobacterales	Helicobacteraceae	Helicobacter	Helicobacter suis
UP000001872	380749	1626	Hydrogenobaculum sp. (strain Y04AAS1)	Bacteria	Aquificae	Aquificae	Aquificales	Aquificaceae	Hydrogenobaculum	Hydrogenobaculum sp. Y04AAS1
UP000001476	515620	2761	Eubacterium eligens (strain ATCC 27750 / VPI C15-48)	Bacteria	Firmicutes	Clostridia	Clostridiales	Lachnospiraceae	Lachnospira	Lachnospira eligens
UP000198793	1166073	4295	Aureimonas jatrophae	Bacteria	Proteobacteria	Alphaproteobacteria	Rhizobiales	Aurantimonadaceae	Aurantimonas	Aureimonas jatrophae
UP000185830	1904640	4404	Betaproteobacteria bacterium GR16-43	Bacteria	Proteobacteria	Betaproteobacteria	NaV	NaV	NaV	Betaproteobacteria bacterium GR16-43
UP000319140	2083017	3953	Ideonella sp. MAG2	Bacteria	Proteobacteria	Betaproteobacteria	Burkholderiales	NaV	Ideonella	Ideonella sp. MAG2
UP000188184	2213202	3921	Planococcus sp. Y42	Bacteria	Firmicutes	Bacilli	Bacillales	Planococcaceae	Planococcus	Planococcus sp. Y42
UP000199356	441119	4454	Tranquillimonas alkanivorans	Bacteria	Proteobacteria	Alphaproteobacteria	Rhodobacterales	Rhodobacteraceae	Tranquillimonas	Tranquillimonas alkanivorans
UP000315389	13243	2325	Rarobacter faecitabidus	Bacteria	Actinobacteria	Actinobacteria	Micrococcales	Rarobacteraceae	Rarobacter	Rarobacter faecitabidus
UP000250268	2099583	7671	Streptomyces sp. ICC1	Bacteria	Actinobacteria	Actinobacteria	Streptomycetales	Streptomycetaceae	Streptomyces	Streptomyces sp. ICC1
UP000000423	273119	611	Ureaplasma parvum serovar 3 (strain ATCC 700970)	Bacteria	Tenericutes	Mollicutes	Mycoplasmatales	Mycoplasmataceae	Ureaplasma	Ureaplasma parvum
UP000238308	323426	2981	beta proteobacterium MWH-P2sevCIIIb	Bacteria	Proteobacteria	Betaproteobacteria	NaV	NaV	NaV	beta proteobacterium MWH-P2sevCIIIb
UP000001416	228410	2375	Nitrosomonas europaea (strain ATCC 19718 / CIP 103999 / KCTC 2705 / NBRC 14298)	Bacteria	Proteobacteria	Betaproteobacteria	Nitrosomonadales	Nitrosomonadaceae	Nitrosomonas	Nitrosomonas europaea
UP000244710	2171979	2959	Arthrobacter sp. Bz4	Bacteria	Actinobacteria	Actinobacteria	Micrococcales	Micrococcaceae	Arthrobacter	Arthrobacter sp. Bz4
UP000027616	1433126	2816	Mucinivorans hirudinis	Bacteria	Bacteroidetes	Bacteroidia	Bacteroidales	Rikenellaceae	Mucinivorans	Mucinivorans hirudinis
UP000015480	1367847	4462	Paracoccus aminophilus JCM 7686	Bacteria	Proteobacteria	Alphaproteobacteria	Rhodobacterales	Rhodobacteraceae	Paracoccus	Paracoccus aminophilus
UP000186406	1123029	4320	Pseudoxanthobacter soli DSM 19599	Bacteria	Proteobacteria	Alphaproteobacteria	Rhizobiales	Xanthobacteraceae	Pseudoxanthobacter	Pseudoxanthobacter soli
UP000285778	2293138	2844	Roseburia sp. AM59-24XD	Bacteria	Firmicutes	Clostridia	Clostridiales	Lachnospiraceae	Roseburia	Roseburia sp. AM59-24XD
UP000199373	81582	2446	Prevotella aff. ruminicola Tc2-24	Bacteria	Bacteroidetes	Bacteroidia	Bacteroidales	Prevotellaceae	Prevotella	Prevotella aff. ruminicola Tc2-24
UP000002192	203907	583	Blochmannia floridanus	Bacteria	Proteobacteria	Gammaproteobacteria	Enterobacterales	Enterobacteriaceae	Candidatus Blochmannia	Candidatus Blochmannia floridanus
UP000217446	1963	10549	Streptomyces olivochromogenes	Bacteria	Actinobacteria	Actinobacteria	Streptomycetales	Streptomycetaceae	Streptomyces	Streptomyces olivochromogenes
UP000193579	1840537	1993	Cycloclasticus sp. symbiont of Poecilosclerida sp. M	Bacteria	Proteobacteria	Gammaproteobacteria	Thiotrichales	Piscirickettsiaceae	Cycloclasticus	Cycloclasticus sp. symbiont of Poecilosclerida sp. M
UP000236226	2035418	1642	bacterium HR23	Bacteria	NaV	NaV	NaV	NaV	NaV	bacterium HR23
UP000320593	150831	4355	Roseibium hamelinense	Bacteria	Proteobacteria	Alphaproteobacteria	Rhodobacterales	Rhodobacteraceae	Roseibium	Roseibium hamelinense
UP000243232	364197	3431	Pseudomonas pohangensis	Bacteria	Proteobacteria	Gammaproteobacteria	Pseudomonadales	Pseudomonadaceae	Pseudomonas	Pseudomonas pohangensis
UP000004200	765913	4731	Thiorhodococcus drewsii AZ1	Bacteria	Proteobacteria	Gammaproteobacteria	Chromatiales	Chromatiaceae	Thiorhodococcus	Thiorhodococcus drewsii
UP000000449	218495	1760	Streptococcus uberis (strain ATCC BAA-854 / 0140J)	Bacteria	Firmicutes	Bacilli	Lactobacillales	Streptococcaceae	Streptococcus	Streptococcus uberis
UP000029732	1287488	2144	Prevotella sp. S7 MS 2	Bacteria	Bacteroidetes	Bacteroidia	Bacteroidales	Prevotellaceae	Prevotella	Prevotella sp. S7 MS 2
UP000199323	380248	7062	Streptomyces alni	Bacteria	Actinobacteria	Actinobacteria	Streptomycetales	Streptomycetaceae	Streptomyces	Streptomyces alni
UP000180019	1678002	5271	Bacillus sp. MUM 116	Bacteria	Firmicutes	Bacilli	Bacillales	Bacillaceae	Bacillus	Bacillus sp. MUM 116
UP000017912	1262776	2596	Clostridium sp. CAG:149	Bacteria	Firmicutes	Clostridia	Clostridiales	Clostridiaceae	Clostridium	Clostridium sp. CAG:149
UP000014104	1140002	4469	Enterococcus avium ATCC 14025	Bacteria	Firmicutes	Bacilli	Lactobacillales	Enterococcaceae	Enterococcus	Enterococcus avium
UP000032120	55969	2703	Leucobacter komagatae	Bacteria	Actinobacteria	Actinobacteria	Micrococcales	Microbacteriaceae	Leucobacter	Leucobacter komagatae
UP000021053	927661	4033	Cryptosporangium arvum DSM 44712	Bacteria	Actinobacteria	Actinobacteria	Cryptosporangiales	Cryptosporangiaceae	Cryptosporangium	Cryptosporangium arvum
UP000266340	2315694	5209	Cohnella sp. K2E09-144	Bacteria	Firmicutes	Bacilli	Bacillales	Paenibacillaceae	Cohnella	Cohnella sp. K2E09-144
UP000292555	2512155	5360	Streptomyces sp. BK239	Bacteria	Actinobacteria	Actinobacteria	Streptomycetales	Streptomycetaceae	Streptomyces	Streptomyces sp. BK239
UP000091979	1560234	2803	Halodesulfovibrio spirochaetisodalis	Bacteria	Proteobacteria	Deltaproteobacteria	Desulfovibrionales	Desulfovibrionaceae	Halodesulfovibrio	Halodesulfovibrio spirochaetisodalis
UP000198915	1884381	5729	Brevibacillus sp. OK042	Bacteria	Firmicutes	Bacilli	Bacillales	Paenibacillaceae	Brevibacillus	Brevibacillus sp. OK042
UP000184485	1122133	4866	Kaistia soli DSM 19436	Bacteria	Proteobacteria	Alphaproteobacteria	Rhizobiales	Rhizobiaceae	Kaistia	Kaistia soli
UP000249343	203274	392	Candidatus Phytoplasma oryzae	Bacteria	Tenericutes	Mollicutes	Acholeplasmatales	Acholeplasmataceae	Candidatus Phytoplasma	Candidatus Phytoplasma oryzae
UP000321199	2597701	3072	Comamonas sp. NLF-7-7	Bacteria	Proteobacteria	Betaproteobacteria	Burkholderiales	Comamonadaceae	Comamonas	Comamonas sp. NLF-7-7
UP000029839	947969	3407	Cellulomonas carbonis T26	Bacteria	Actinobacteria	Actinobacteria	Micrococcales	Cellulomonadaceae	Cellulomonas	Cellulomonas carbonis
UP000018408	1262904	1281	Mycoplasma sp. CAG:472	Bacteria	Tenericutes	Mollicutes	Mycoplasmatales	Mycoplasmataceae	Mycoplasma	Mycoplasma sp. CAG:472
UP000034222	1605376	4252	Clostridiales bacterium PH28_bin88	Bacteria	Firmicutes	Clostridia	Clostridiales	NaV	NaV	Clostridiales bacterium PH28_bin88
UP000287470	2306974	1965	Bifidobacterium samirii	Bacteria	Actinobacteria	Actinobacteria	Bifidobacteriales	Bifidobacteriaceae	Bifidobacterium	Bifidobacterium samirii
UP000029033	158787	2477	Bifidobacterium scardovii	Bacteria	Actinobacteria	Actinobacteria	Bifidobacteriales	Bifidobacteriaceae	Bifidobacterium	Bifidobacterium scardovii
UP000014227	1303518	2809	Chthonomonas calidirosea (strain DSM 23976 / ICMP 18418 / T49)	Bacteria	Armatimonadetes	Chthonomonadetes	Chthonomonadales	Chthonomonadaceae	Chthonomonas	Chthonomonas calidirosea
UP000199251	141349	6333	Mycobacterium lentiflavum	Bacteria	Actinobacteria	Actinobacteria	Corynebacteriales	Mycobacteriaceae	Mycobacterium	Mycobacterium lentiflavum
UP000186950	1337886	4565	Sporomusa sphaeroides DSM 2875	Bacteria	Firmicutes	Negativicutes	Selenomonadales	Sporomusaceae	Sporomusa	Sporomusa sphaeroides
UP000070503	1588751	1550	Tissierellia bacterium KA00581	Bacteria	Firmicutes	Tissierellia	NaV	NaV	NaV	Tissierellia bacterium KA00581
UP000018184	1262930	2309	Prevotella sp. CAG:5226	Bacteria	Bacteroidetes	Bacteroidia	Bacteroidales	Prevotellaceae	Prevotella	Prevotella sp. CAG:5226
UP000009319	1211777	6358	Rhizobium mesoamericanum STM3625	Bacteria	Proteobacteria	Alphaproteobacteria	Rhizobiales	Rhizobiaceae	Rhizobium	Rhizobium mesoamericanum
UP000002751	1032868	3217	Pasteurella multocida subsp. multocida str. Anand1_buffalo	Bacteria	Proteobacteria	Gammaproteobacteria	Pasteurellales	Pasteurellaceae	Pasteurella	Pasteurella multocida
UP000018065	1262784	1330	Clostridium sp. CAG:245	Bacteria	Firmicutes	Clostridia	Clostridiales	Clostridiaceae	Clostridium	Clostridium sp. CAG:245
UP000027148	1415657	243	Candidatus Walczuchella monophlebidarum	Bacteria	Bacteroidetes	Flavobacteriia	Flavobacteriales	NaV	Candidatus Walczuchella	Candidatus Walczuchella monophlebidarum
UP000196485	512643	3753	Photobacterium aquimaris	Bacteria	Proteobacteria	Gammaproteobacteria	Vibrionales	Vibrionaceae	Photobacterium	Photobacterium aquimaris
UP000037939	857265	4368	Amantichitinum ursilacus	Bacteria	Proteobacteria	Betaproteobacteria	Neisseriales	Neisseriaceae	Amantichitinum	Amantichitinum ursilacus
UP000199159	930152	4559	Bacillus salsus	Bacteria	Firmicutes	Bacilli	Bacillales	Bacillaceae	Bacillus	Bacillus salsus
UP000077177	1492898	4588	Flavisolibacter tropicus	Bacteria	Bacteroidetes	Chitinophagia	Chitinophagales	Chitinophagaceae	Flavisolibacter	Flavisolibacter tropicus
UP000018292	1262945	2223	Roseburia sp. CAG:309	Bacteria	Firmicutes	Clostridia	Clostridiales	Lachnospiraceae	Roseburia	Roseburia sp. CAG:309
UP000001170	264199	1577	Streptococcus thermophilus (strain ATCC BAA-250 / LMG 18311)	Bacteria	Firmicutes	Bacilli	Lactobacillales	Streptococcaceae	Streptococcus	Streptococcus thermophilus
UP000262621	2294034	5663	Verrucosispora sp. LHW63014	Bacteria	Actinobacteria	Actinobacteria	Micromonosporales	Micromonosporaceae	Verrucosispora	Verrucosispora sp. LHW63014
UP000198575	578942	3897	Dokdonella immobilis	Bacteria	Proteobacteria	Gammaproteobacteria	Xanthomonadales	Rhodanobacteraceae	Dokdonella	Dokdonella immobilis
UP000271374	2492960	4414	Bacillus sp. XXST-01	Bacteria	Firmicutes	Bacilli	Bacillales	Bacillaceae	Bacillus	Bacillus sp. XXST-01
UP000242869	83765	2769	Formivibrio citricus	Bacteria	Proteobacteria	Betaproteobacteria	Neisseriales	Chromobacteriaceae	Formivibrio	Formivibrio citricus
UP000276888	1072463	3276	Microbacterium lemovicicum	Bacteria	Actinobacteria	Actinobacteria	Micrococcales	Microbacteriaceae	Microbacterium	Microbacterium lemovicicum
UP000315628	415218	2675	Marihabitans asiaticum	Bacteria	Actinobacteria	Actinobacteria	Micrococcales	Intrasporangiaceae	Marihabitans	Marihabitans asiaticum
UP000182744	1657	1723	Actinobaculum suis	Bacteria	Actinobacteria	Actinobacteria	Actinomycetales	Actinomycetaceae	Actinobaculum	Actinobaculum suis
UP000198944	1520812	4055	Butyrivibrio sp. YAB3001	Bacteria	Firmicutes	Clostridia	Clostridiales	Lachnospiraceae	Butyrivibrio	Butyrivibrio sp. YAB3001
UP000032320	1566358	4588	Paenibacillus sp. IHBB 10380	Bacteria	Firmicutes	Bacilli	Bacillales	Paenibacillaceae	Paenibacillus	Paenibacillus sp. IHBB 10380
UP000295293	520092	5664	Tahibacter aquaticus	Bacteria	Proteobacteria	Gammaproteobacteria	Xanthomonadales	Rhodanobacteraceae	Tahibacter	Tahibacter aquaticus
UP000001299	515622	3799	Butyrivibrio proteoclasticus (strain ATCC 51982 / DSM 14932 / B316) (Clostridium proteoclasticum)	Bacteria	Firmicutes	Clostridia	Clostridiales	Lachnospiraceae	Butyrivibrio	Butyrivibrio proteoclasticus
UP000030905	1262449	3930	Clostridium pasteurianum DSM 525 = ATCC 6013	Bacteria	Firmicutes	Clostridia	Clostridiales	Clostridiaceae	Clostridium	Clostridium pasteurianum
UP000317893	402171	4122	Lapillicoccus jejuensis	Bacteria	Actinobacteria	Actinobacteria	Micrococcales	Intrasporangiaceae	Lapillicoccus	Lapillicoccus jejuensis
UP000006637	266117	3127	Rubrobacter xylanophilus (strain DSM 9941 / NBRC 16129)	Bacteria	Actinobacteria	Rubrobacteria	Rubrobacterales	Rubrobacteraceae	Rubrobacter	Rubrobacter xylanophilus
UP000219559	319238	3771	Sediminicola luteus	Bacteria	Bacteroidetes	Flavobacteriia	Flavobacteriales	Flavobacteriaceae	Sediminicola	Sediminicola luteus
UP000187462	1936080	2928	Winogradskyella sp. J14-2	Bacteria	Bacteroidetes	Flavobacteriia	Flavobacteriales	Flavobacteriaceae	Winogradskyella	Winogradskyella sp. J14-2
UP000196550	1965571	2792	Erysipelatoclostridium sp. An173	Bacteria	Firmicutes	Erysipelotrichia	Erysipelotrichales	Erysipelotrichaceae	Erysipelatoclostridium	Erysipelatoclostridium sp. An173
UP000293446	1902503	2976	Marinomonas sp. QM202	Bacteria	Proteobacteria	Gammaproteobacteria	Oceanospirillales	Oceanospirillaceae	Marinomonas	Marinomonas sp. QM202
UP000325289	936889	4371	Roseivivax sediminis	Bacteria	Proteobacteria	Alphaproteobacteria	Rhodobacterales	Rhodobacteraceae	Roseivivax	Roseivivax sediminis
UP000198461	364032	1631	Sulfurivirga caldicuralii	Bacteria	Proteobacteria	Gammaproteobacteria	Thiotrichales	Piscirickettsiaceae	Sulfurivirga	Sulfurivirga caldicuralii
UP000199543	1520825	2824	Lachnospiraceae bacterium XPB1003	Bacteria	Firmicutes	Clostridia	Clostridiales	Lachnospiraceae	NaV	Lachnospiraceae bacterium XPB1003
UP000062833	656366	3261	Arthrobacter alpinus	Bacteria	Actinobacteria	Actinobacteria	Micrococcales	Micrococcaceae	Arthrobacter	Arthrobacter alpinus
UP000186806	223900	3457	Chromohalobacter japonicus	Bacteria	Proteobacteria	Gammaproteobacteria	Oceanospirillales	Halomonadaceae	Chromohalobacter	Chromohalobacter japonicus
UP000285456	372463	4512	Oceanobacillus profundus	Bacteria	Firmicutes	Bacilli	Bacillales	Bacillaceae	Oceanobacillus	Oceanobacillus profundus
UP000199417	168276	4987	Rhodococcus tukisamuensis	Bacteria	Actinobacteria	Actinobacteria	Corynebacteriales	Nocardiaceae	Rhodococcus	Rhodococcus tukisamuensis
UP000198718	393762	2920	Natronincola ferrireducens	Bacteria	Firmicutes	Clostridia	Clostridiales	Clostridiaceae	Natronincola	Natronincola ferrireducens
UP000027986	1274	2255	Dermacoccus nishinomiyaensis	Bacteria	Actinobacteria	Actinobacteria	Micrococcales	Dermacoccaceae	Dermacoccus	Dermacoccus nishinomiyaensis
UP000218965	279828	2621	Microcella alkaliphila	Bacteria	Actinobacteria	Actinobacteria	Micrococcales	Microbacteriaceae	Microcella	Microcella alkaliphila
UP000198706	137658	5180	Pseudomonas indica	Bacteria	Proteobacteria	Gammaproteobacteria	Pseudomonadales	Pseudomonadaceae	Pseudomonas	Pseudomonas indica
UP000076023	690879	4168	Terrimicrobium sacchariphilum	Bacteria	Verrucomicrobia	Spartobacteria	NaV	NaV	Terrimicrobium	Terrimicrobium sacchariphilum
UP000002011	471854	5703	Dyadobacter fermentans (strain ATCC 700827 / DSM 18053 / NS114)	Bacteria	Bacteroidetes	Cytophagia	Cytophagales	Cytophagaceae	Dyadobacter	Dyadobacter fermentans
UP000078223	1849170	3813	Rhodobacteraceae bacterium EhC02	Bacteria	Proteobacteria	Alphaproteobacteria	Rhodobacterales	Rhodobacteraceae	NaV	Rhodobacteraceae bacterium EhC02
UP000005365	547045	3646	Neisseria sicca ATCC 29256	Bacteria	Proteobacteria	Betaproteobacteria	Neisseriales	Neisseriaceae	Neisseria	Neisseria sicca
UP000014412	1078085	3445	Paenisporosarcina sp. HGH0030	Bacteria	Firmicutes	Bacilli	Bacillales	Planococcaceae	Paenisporosarcina	Paenisporosarcina sp. HGH0030
UP000295623	2530371	7614	Actinomadura sp. KC345	Bacteria	Actinobacteria	Actinobacteria	Streptosporangiales	Thermomonosporaceae	Actinomadura	Actinomadura sp. KC345
UP000011721	1167006	3514	Desulfocapsa sulfexigens (strain DSM 10523 / SB164P1)	Bacteria	Proteobacteria	Deltaproteobacteria	Desulfobacterales	Desulfobulbaceae	Desulfocapsa	Desulfocapsa sulfexigens
UP000253090	1416533	4966	Fontibacillus phaseoli	Bacteria	Firmicutes	Bacilli	Bacillales	Paenibacillaceae	Fontibacillus	Fontibacillus phaseoli
UP000236563	2035425	3301	bacterium HR30	Bacteria	NaV	NaV	NaV	NaV	NaV	bacterium HR30
UP000017958	1263095	2847	Paraprevotella clara CAG:116	Bacteria	Bacteroidetes	Bacteroidia	Bacteroidales	Prevotellaceae	Paraprevotella	Paraprevotella clara CAG:116
UP000318590	2489174	3702	Paenimaribius caenipelagi	Bacteria	Proteobacteria	Alphaproteobacteria	Rhodobacterales	Rhodobacteraceae	Paenimaribius	Paenimaribius caenipelagi
UP000295698	2512158	7370	Rhizobium sp. BK333	Bacteria	Proteobacteria	Alphaproteobacteria	Rhizobiales	Rhizobiaceae	Rhizobium	Rhizobium sp. BK333
UP000195783	1965549	3048	Gemmiger sp. An120	Bacteria	Firmicutes	Clostridia	Clostridiales	Ruminococcaceae	Gemmiger	Gemmiger sp. An120
UP000005139	401526	2738	Thermosinus carboxydivorans Nor1	Bacteria	Firmicutes	Negativicutes	Selenomonadales	Sporomusaceae	Thermosinus	Thermosinus carboxydivorans
UP000029629	1401065	2118	Oligella urethralis DNF00040	Bacteria	Proteobacteria	Betaproteobacteria	Burkholderiales	Alcaligenaceae	Oligella	Oligella urethralis
UP000002186	85643	3927	Thauera sp. (strain MZ1T)	Bacteria	Proteobacteria	Betaproteobacteria	Rhodocyclales	Zoogloeaceae	Thauera	Thauera sp. MZ1T
UP000238634	1920490	5141	Phormidesmis priestleyi ULC007	Bacteria	Cyanobacteria	NaV	Synechococcales	Leptolyngbyaceae	Phormidesmis	Phormidesmis priestleyi
UP000010460	1035197	2316	Prevotella sp. oral taxon 473 str. F0040	Bacteria	Bacteroidetes	Bacteroidia	Bacteroidales	Prevotellaceae	Alloprevotella	Prevotella sp. oral taxon 473
UP000193202	169765	4187	Mycobacterium lacus	Bacteria	Actinobacteria	Actinobacteria	Corynebacteriales	Mycobacteriaceae	Mycobacterium	Mycobacterium lacus
UP000198963	1249933	3162	Winogradskyella sp. RHA_55	Bacteria	Bacteroidetes	Flavobacteriia	Flavobacteriales	Flavobacteriaceae	Winogradskyella	Winogradskyella sp. RHA_55
UP000034156	44574	3064	Nitrosomonas communis	Bacteria	Proteobacteria	Betaproteobacteria	Nitrosomonadales	Nitrosomonadaceae	Nitrosomonas	Nitrosomonas communis
UP000000270	438753	4708	Azorhizobium caulinodans (strain ATCC 43989 / DSM 5975 / JCM 20966 / NBRC 14845 / NCIMB 13405 / ORS 571)	Bacteria	Proteobacteria	Alphaproteobacteria	Rhizobiales	Xanthobacteraceae	Azorhizobium	Azorhizobium caulinodans
UP000244081	665038	4681	Breoghania corrubedonensis	Bacteria	Proteobacteria	Alphaproteobacteria	Rhizobiales	Cohaesibacteraceae	Breoghania	Breoghania corrubedonensis
UP000317940	281105	8776	Kitasatospora viridis	Bacteria	Actinobacteria	Actinobacteria	Streptomycetales	Streptomycetaceae	Kitasatospora	Kitasatospora viridis
UP000006034	563192	3779	Bilophila wadsworthia 3_1_6	Bacteria	Proteobacteria	Deltaproteobacteria	Desulfovibrionales	Desulfovibrionaceae	Bilophila	Bilophila wadsworthia
UP000195558	1985873	2803	Sulfuriferula sp. AH1	Bacteria	Proteobacteria	Betaproteobacteria	Nitrosomonadales	Gallionellaceae	Sulfuriferula	Sulfuriferula sp. AH1
UP000008297	983544	2958	Lacinutrix sp. (strain 5H-3-7-4)	Bacteria	Bacteroidetes	Flavobacteriia	Flavobacteriales	Flavobacteriaceae	Lacinutrix	Lacinutrix sp. 5H-3-7-4
UP000018542	1029756	3330	Hyphomicrobium nitrativorans NL23	Bacteria	Proteobacteria	Alphaproteobacteria	Rhizobiales	Hyphomicrobiaceae	Hyphomicrobium	Hyphomicrobium nitrativorans
UP000245368	2202254	2903	Deinococcus irradiatisoli	Bacteria	Deinococcus-Thermus	Deinococci	Deinococcales	Deinococcaceae	Deinococcus	Deinococcus irradiatisoli
UP000217256	1394709	1059	candidate division SR1 bacterium RAAC1_SR1_1	Bacteria	NaV	NaV	NaV	NaV	NaV	candidate division SR1 bacterium RAAC1_SR1_1
UP000198908	416944	6389	Burkholderia sp. TNe-862	Bacteria	Proteobacteria	Betaproteobacteria	Burkholderiales	Burkholderiaceae	Burkholderia	Burkholderia sp. TNe-862
UP000264876	1446794	3211	Frondihabitans sp. 762G35	Bacteria	Actinobacteria	Actinobacteria	Micrococcales	Microbacteriaceae	Frondihabitans	Frondihabitans sp. 762G35
UP000054731	1737066	6655	Streptomyces sp. AVP053U2	Bacteria	Actinobacteria	Actinobacteria	Streptomycetales	Streptomycetaceae	Streptomyces	Streptomyces sp. AVP053U2
UP000071392	1548208	1549	Cephaloticoccus capnophilus	Bacteria	Verrucomicrobia	Opitutae	Opitutales	Opitutaceae	Cephaloticoccus	Cephaloticoccus capnophilus
UP000182958	971	2579	Selenomonas ruminantium	Bacteria	Firmicutes	Negativicutes	Selenomonadales	Selenomonadaceae	Selenomonas	Selenomonas ruminantium
UP000019095	1247726	4072	Advenella mimigardefordensis DPN7	Bacteria	Proteobacteria	Betaproteobacteria	Burkholderiales	Alcaligenaceae	Advenella	Advenella mimigardefordensis
UP000239866	2109942	3641	Marinobacter fuscus	Bacteria	Proteobacteria	Gammaproteobacteria	Alteromonadales	Alteromonadaceae	Marinobacter	Marinobacter fuscus
UP000019494	584657	4363	Intrasporangium chromatireducens Q5-1	Bacteria	Actinobacteria	Actinobacteria	Micrococcales	Intrasporangiaceae	Intrasporangium	Intrasporangium chromatireducens
UP000293149	1869212	3060	Chitinophagaceae bacterium	Bacteria	Bacteroidetes	Chitinophagia	Chitinophagales	Chitinophagaceae	NaV	Chitinophagaceae bacterium
UP000291269	2508949	2214	Candidatus Borkfalkia ceftriaxoniphila	Bacteria	Firmicutes	Clostridia	Candidatus Borkfalkiales	Candidatus Borkfalkiaceae	Candidatus Borkfalkia	Candidatus Borkfalkia ceftriaxoniphila
UP000033035	1203610	5316	Parabacteroides gordonii MS-1 = DSM 23371	Bacteria	Bacteroidetes	Bacteroidia	Bacteroidales	Tannerellaceae	Parabacteroides	Parabacteroides gordonii
UP000050856	1736225	4431	Erwinia sp. Leaf53	Bacteria	Proteobacteria	Gammaproteobacteria	Enterobacterales	Erwiniaceae	Erwinia	Erwinia sp. Leaf53
UP000027746	1402135	4679	Sulfitobacter pseudonitzschiae	Bacteria	Proteobacteria	Alphaproteobacteria	Rhodobacterales	Rhodobacteraceae	Sulfitobacter	Sulfitobacter pseudonitzschiae
UP000319210	66857	6946	Streptomyces cacaoi subsp. cacaoi	Bacteria	Actinobacteria	Actinobacteria	Streptomycetales	Streptomycetaceae	Streptomyces	Streptomyces cacaoi
UP000050514	360411	2990	Bellilinea caldifistulae	Bacteria	Chloroflexi	Anaerolineae	Anaerolineales	Anaerolineaceae	Bellilinea	Bellilinea caldifistulae
UP000321574	2498845	2897	Cerasibacillus sp. CC-CFT480	Bacteria	Firmicutes	Bacilli	Bacillales	Bacillaceae	Cerasibacillus	Cerasibacillus sp. CC-CFT480
UP000321746	304077	3655	Acetobacter oeni	Bacteria	Proteobacteria	Alphaproteobacteria	Rhodospirillales	Acetobacteraceae	Acetobacter	Acetobacter oeni
UP000075653	1789004	2451	Ferrovum sp. Z-31	Bacteria	Proteobacteria	Betaproteobacteria	Ferrovales	Ferrovaceae	Ferrovum	Ferrovum sp. Z-31
UP000187142	1906324	2773	Tessaracoccus sp. ZS01	Bacteria	Actinobacteria	Actinobacteria	Propionibacteriales	Propionibacteriaceae	Tessaracoccus	Tessaracoccus sp. ZS01
UP000001584	83332	3993	Mycobacterium tuberculosis (strain ATCC 25618 / H37Rv)	Bacteria	Actinobacteria	Actinobacteria	Corynebacteriales	Mycobacteriaceae	Mycobacterium	Mycobacterium tuberculosis
UP000018112	1262998	2021	Firmicutes bacterium CAG:102	Bacteria	Firmicutes	NaV	NaV	NaV	NaV	Firmicutes bacterium CAG:102
UP000006820	247156	5941	Nocardia farcinica (strain IFM 10152)	Bacteria	Actinobacteria	Actinobacteria	Corynebacteriales	Nocardiaceae	Nocardia	Nocardia farcinica
UP000295416	442528	4593	Scopulibacillus darangshiensis	Bacteria	Firmicutes	Bacilli	Bacillales	Sporolactobacillaceae	Scopulibacillus	Scopulibacillus darangshiensis
UP000267192	2491047	2505	Fretibacterium sp. OH1220_COT-178	Bacteria	Synergistetes	Synergistia	Synergistales	Synergistaceae	Fretibacterium	Fretibacterium sp. OH1220_COT-178
UP000051759	1736318	5992	Pseudorhodoferax sp. Leaf274	Bacteria	Proteobacteria	Betaproteobacteria	Burkholderiales	Comamonadaceae	Pseudorhodoferax	Pseudorhodoferax sp. Leaf274
UP000249720	1004304	2813	Hydrotalea sandarakina	Bacteria	Bacteroidetes	Chitinophagia	Chitinophagales	Chitinophagaceae	Hydrotalea	Hydrotalea sandarakina
UP000033511	43662	4134	Pseudoalteromonas piscicida	Bacteria	Proteobacteria	Gammaproteobacteria	Alteromonadales	Pseudoalteromonadaceae	Pseudoalteromonas	Pseudoalteromonas piscicida
UP000253016	1653064	2338	Halanaerobium sp. DL-01	Bacteria	Firmicutes	Clostridia	Halanaerobiales	Halanaerobiaceae	Halanaerobium	Halanaerobium sp. DL-01
UP000003644	487796	1770	Flavobacteria bacterium (strain MS024-2A)	Bacteria	Bacteroidetes	Flavobacteriia	NaV	NaV	NaV	Flavobacteria bacterium MS024-2A
UP000199427	571933	3140	Piscibacillus halophilus	Bacteria	Firmicutes	Bacilli	Bacillales	Bacillaceae	Piscibacillus	Piscibacillus halophilus
UP000019666	442562	4946	Rubellimicrobium mesophilum DSM 19309	Bacteria	Proteobacteria	Alphaproteobacteria	Rhodobacterales	Rhodobacteraceae	Rubellimicrobium	Rubellimicrobium mesophilum
UP000249120	1969380	7157	Bacillus sp. SRB_336	Bacteria	Firmicutes	Bacilli	Bacillales	Bacillaceae	Bacillus	Bacillus sp. SRB_336
UP000048984	665126	5501	Prosthecomicrobium hirschii	Bacteria	Proteobacteria	Alphaproteobacteria	Rhizobiales	Hyphomicrobiaceae	Prosthecomicrobium	Prosthecomicrobium hirschii
UP000229466	1889772	3696	Reichenbachiella sp. 5M10	Bacteria	Bacteroidetes	Cytophagia	Cytophagales	Flammeovirgaceae	Reichenbachiella	Reichenbachiella sp. 5M10
UP000217698	2005460	4342	Chondrocystis sp. NIES-4102	Bacteria	Cyanobacteria	NaV	Chroococcales	Chroococcaceae	Chondrocystis	Chondrocystis sp. NIES-4102
UP000005096	584708	2391	Aminomonas paucivorans DSM 12260	Bacteria	Synergistetes	Synergistia	Synergistales	Synergistaceae	Aminomonas	Aminomonas paucivorans
UP000193207	505353	3635	Roseovarius halotolerans	Bacteria	Proteobacteria	Alphaproteobacteria	Rhodobacterales	Rhodobacteraceae	Roseovarius	Roseovarius halotolerans
UP000278886	2419774	2836	Protaetiibacter intestinalis	Bacteria	Actinobacteria	Actinobacteria	Micrococcales	Microbacteriaceae	Protaetiibacter	Protaetiibacter intestinalis
UP000294360	227605	4207	Methylocella tundrae	Bacteria	Proteobacteria	Alphaproteobacteria	Rhizobiales	Beijerinckiaceae	Methylocella	Methylocella tundrae
UP000217826	2024899	1828	Candidatus Izimaplasma sp. ZiA1	Bacteria	Tenericutes	NaV	NaV	NaV	Candidatus Izimaplasma	Candidatus Izimaplasma sp. ZiA1
UP000008212	243275	2753	Treponema denticola (strain ATCC 35405 / CIP 103919 / DSM 14222)	Bacteria	Spirochaetes	Spirochaetia	Spirochaetales	Spirochaetaceae	Treponema	Treponema denticola
UP000294853	2518371	3712	Nocardioides sp. MMS17-SY207-3	Bacteria	Actinobacteria	Actinobacteria	Propionibacteriales	Nocardioidaceae	Nocardioides	Nocardioides seonyuensis
UP000231791	58340	7724	Streptomyces lavendulae subsp. lavendulae	Bacteria	Actinobacteria	Actinobacteria	Streptomycetales	Streptomycetaceae	Streptomyces	Streptomyces lavendulae
UP000010472	1173022	4697	Crinalium epipsammum PCC 9333	Bacteria	Cyanobacteria	NaV	Oscillatoriales	Gomontiellaceae	Crinalium	Crinalium epipsammum
UP000273170	1522760	5946	Streptomyces sp. ADI96-02	Bacteria	Actinobacteria	Actinobacteria	Streptomycetales	Streptomycetaceae	Streptomyces	Streptomyces sp. ADI96-02
UP000064967	1391654	11481	Labilithrix luteola	Bacteria	Proteobacteria	Deltaproteobacteria	Myxococcales	Labilitrichaceae	Labilithrix	Labilithrix luteola
UP000242850	29344	1775	Caloramator fervidus	Bacteria	Firmicutes	Clostridia	Clostridiales	Clostridiaceae	Caloramator	Caloramator fervidus
UP000032680	1231350	2788	Acidisphaera rubrifaciens HS-AP3	Bacteria	Proteobacteria	Alphaproteobacteria	Rhodospirillales	Acetobacteraceae	Acidisphaera	Acidisphaera rubrifaciens
UP000297602	2558281	1666	Gemella sp. WT2a	Bacteria	Firmicutes	Bacilli	Bacillales	NaV	Gemella	Gemella sp. WT2a
UP000271566	2292448	3424	Thermoanaerobacteraceae bacterium SP2	Bacteria	Firmicutes	Clostridia	Thermoanaerobacterales	Thermoanaerobacteraceae	NaV	Thermoanaerobacteraceae bacterium SP2
UP000199024	474950	4259	Granulicella pectinivorans	Bacteria	Acidobacteria	Acidobacteriia	Acidobacteriales	Acidobacteriaceae	Granulicella	Granulicella pectinivorans
UP000189189	1945864	5133	Hydrogenophaga sp. A37	Bacteria	Proteobacteria	Betaproteobacteria	Burkholderiales	Comamonadaceae	Hydrogenophaga	Hydrogenophaga sp. A37
UP000224563	1712665	2568	Agathobacter ruminis	Bacteria	Firmicutes	Clostridia	Clostridiales	Lachnospiraceae	Agathobacter	Agathobacter ruminis
UP000027931	1157490	4452	Tumebacillus flagellatus	Bacteria	Firmicutes	Bacilli	Bacillales	Alicyclobacillaceae	Tumebacillus	Tumebacillus flagellatus
UP000005244	796937	2275	Peptoanaerobacter stomatis	Bacteria	Firmicutes	Clostridia	Clostridiales	Peptostreptococcaceae	Peptoanaerobacter	Peptoanaerobacter stomatis
UP000217500	1462730	1168	Sodalis-like endosymbiont of Proechinophthirus fluctus	Bacteria	Proteobacteria	Gammaproteobacteria	Enterobacterales	Pectobacteriaceae	Sodalis	Sodalis-like endosymbiont of Proechinophthirus fluctus
UP000094795	1480615	4182	Hoeflea olei	Bacteria	Proteobacteria	Alphaproteobacteria	Rhizobiales	Phyllobacteriaceae	Hoeflea	Hoeflea olei
UP000033836	1642040	3028	Leucobacter sp. Ag1	Bacteria	Actinobacteria	Actinobacteria	Micrococcales	Microbacteriaceae	Leucobacter	Leucobacter sp. Ag1
UP000002522	272633	1028	Mycoplasma penetrans (strain HF-2)	Bacteria	Tenericutes	Mollicutes	Mycoplasmatales	Mycoplasmataceae	Mycoplasma	Mycoplasma penetrans
UP000307602	2559571	4045	Flavivirga rizhaonensis	Bacteria	Bacteroidetes	Flavobacteriia	Flavobacteriales	Flavobacteriaceae	Flavivirga	Flavivirga rizhaonensis
UP000095349	285473	5418	Streptomyces rubrolavendulae	Bacteria	Actinobacteria	Actinobacteria	Streptomycetales	Streptomycetaceae	Streptomyces	Streptomyces rubrolavendulae
UP000003028	525280	1644	Erysipelothrix rhusiopathiae ATCC 19414	Bacteria	Firmicutes	Erysipelotrichia	Erysipelotrichales	Erysipelotrichaceae	Erysipelothrix	Erysipelothrix rhusiopathiae
UP000242921	1970199	4071	Sorangiineae bacterium NIC37A_2	Bacteria	Proteobacteria	Deltaproteobacteria	Myxococcales	NaV	NaV	Sorangiineae bacterium NIC37A_2
UP000218514	2005458	6898	Nostoc sp. NIES-4103	Bacteria	Cyanobacteria	NaV	Nostocales	Nostocaceae	Nostoc	Nostoc sp. NIES-4103
UP000238368	2071994	2382	Corynebacterium sp. 13CS0277	Bacteria	Actinobacteria	Actinobacteria	Corynebacteriales	Corynebacteriaceae	Corynebacterium	Corynebacterium sp. 13CS0277
UP000234289	273384	3608	Brevibacterium aurantiacum	Bacteria	Actinobacteria	Actinobacteria	Micrococcales	Brevibacteriaceae	Brevibacterium	Brevibacterium aurantiacum
UP000198825	546874	3981	Friedmanniella sagamiharensis	Bacteria	Actinobacteria	Actinobacteria	Propionibacteriales	Nocardioidaceae	Friedmanniella	Friedmanniella sagamiharensis
UP000231960	2008672	2179	Flavobacteriaceae bacterium UR159	Bacteria	Bacteroidetes	Flavobacteriia	Flavobacteriales	Flavobacteriaceae	NaV	Flavobacteriaceae bacterium UR159
UP000075086	1484116	4436	Hymenobacter sp. PAMC 26554	Bacteria	Bacteroidetes	Cytophagia	Cytophagales	Hymenobacteraceae	Hymenobacter	Hymenobacter sp. PAMC 26554
UP000030988	1572751	2758	Croceibacterium mercuriale	Bacteria	Proteobacteria	Alphaproteobacteria	Sphingomonadales	Erythrobacteraceae	Croceibacterium	Croceibacterium mercuriale
UP000316850	2590015	3378	Shewanella sp. SNU WT4	Bacteria	Proteobacteria	Gammaproteobacteria	Alteromonadales	Shewanellaceae	Shewanella	Shewanella sp. SNU WT4
UP000217785	1348429	3689	Effusibacillus lacus	Bacteria	Firmicutes	Bacilli	Bacillales	Alicyclobacillaceae	Effusibacillus	Effusibacillus lacus
UP000195838	1965618	2772	Desulfovibrio sp. An276	Bacteria	Proteobacteria	Deltaproteobacteria	Desulfovibrionales	Desulfovibrionaceae	Desulfovibrio	Desulfovibrio sp. An276
UP000027337	83219	3649	Sulfitobacter mediterraneus	Bacteria	Proteobacteria	Alphaproteobacteria	Rhodobacterales	Rhodobacteraceae	Sulfitobacter	Sulfitobacter mediterraneus
UP000002719	359391	3023	Brucella abortus (strain 2308)	Bacteria	Proteobacteria	Alphaproteobacteria	Rhizobiales	Brucellaceae	Brucella	Brucella abortus
UP000317238	2527977	5367	Planctomycetes bacterium Pan14r	Bacteria	Planctomycetes	NaV	NaV	NaV	NaV	Planctomycetes bacterium Pan14r
UP000002431	319795	3006	Deinococcus geothermalis (strain DSM 11300)	Bacteria	Deinococcus-Thermus	Deinococci	Deinococcales	Deinococcaceae	Deinococcus	Deinococcus geothermalis
UP000031526	40318	5863	Streptomyces nodosus	Bacteria	Actinobacteria	Actinobacteria	Streptomycetales	Streptomycetaceae	Streptomyces	Streptomyces nodosus
UP000018266	1262876	1581	Eggerthella sp. CAG:298	Bacteria	Actinobacteria	Coriobacteriia	Eggerthellales	Eggerthellaceae	Eggerthella	Eggerthella sp. CAG:298
UP000077881	217031	4048	Bacillus galactosidilyticus	Bacteria	Firmicutes	Bacilli	Bacillales	Bacillaceae	Bacillus	Bacillus galactosidilyticus
UP000199068	1121325	3588	Romboutsia lituseburensis DSM 797	Bacteria	Firmicutes	Clostridia	Clostridiales	Peptostreptococcaceae	Romboutsia	Romboutsia lituseburensis
UP000297903	1259182	3588	Cryobacterium sp. MDB2-A-2	Bacteria	Actinobacteria	Actinobacteria	Micrococcales	Microbacteriaceae	Cryobacterium	Cryobacterium sp. MDB2-A-2
UP000184436	871325	4051	Bacteroides faecichinchillae	Bacteria	Bacteroidetes	Bacteroidia	Bacteroidales	Bacteroidaceae	Bacteroides	Bacteroides faecichinchillae
UP000289243	2003592	6717	Paenibacillaceae bacterium	Bacteria	Firmicutes	Bacilli	Bacillales	Paenibacillaceae	NaV	Paenibacillaceae bacterium
UP000185003	536979	5774	Chitinophaga niabensis	Bacteria	Bacteroidetes	Chitinophagia	Chitinophagales	Chitinophagaceae	Chitinophaga	Chitinophaga niabensis
UP000018279	1263006	2216	Firmicutes bacterium CAG:170	Bacteria	Firmicutes	NaV	NaV	NaV	NaV	Firmicutes bacterium CAG:170
UP000245667	429344	4431	Maribacter polysiphoniae	Bacteria	Bacteroidetes	Flavobacteriia	Flavobacteriales	Flavobacteriaceae	Maribacter	Maribacter polysiphoniae
UP000232638	1166950	6068	Candidatus Thiodictyon syntrophicum	Bacteria	Proteobacteria	Gammaproteobacteria	Chromatiales	Chromatiaceae	Thiodictyon	Candidatus Thiodictyon syntrophicum
UP000318578	715473	7527	Amycolatopsis acidiphila	Bacteria	Actinobacteria	Actinobacteria	Pseudonocardiales	Pseudonocardiaceae	Amycolatopsis	Amycolatopsis acidiphila
UP000002710	207559	3220	Desulfovibrio alaskensis (strain G20) (Desulfovibrio desulfuricans (strain G20))	Bacteria	Proteobacteria	Deltaproteobacteria	Desulfovibrionales	Desulfovibrionaceae	Desulfovibrio	Desulfovibrio alaskensis
UP000001702	706191	4241	Pantoea ananatis (strain LMG 20103)	Bacteria	Proteobacteria	Gammaproteobacteria	Enterobacterales	Erwiniaceae	Pantoea	Pantoea ananatis
UP000016160	1347342	3557	Formosa agariphila (strain DSM 15362 / KCTC 12365 / LMG 23005 / KMM 3901)	Bacteria	Bacteroidetes	Flavobacteriia	Flavobacteriales	Flavobacteriaceae	Formosa	Formosa agariphila
UP000278479	2484250	4075	Marinobacter sp. R17	Bacteria	Proteobacteria	Gammaproteobacteria	Alteromonadales	Alteromonadaceae	Marinobacter	Marinobacter sp. R17
UP000019150	1415166	7577	Nocardia nova SH22a	Bacteria	Actinobacteria	Actinobacteria	Corynebacteriales	Nocardiaceae	Nocardia	Nocardia nova
UP000235118	2054168	4582	Bacillus sp. T33-2	Bacteria	Firmicutes	Bacilli	Bacillales	Bacillaceae	Bacillus	Bacillus sp. T33-2
UP000215773	2015572	2726	Alphaproteobacteria bacterium PA4	Bacteria	Proteobacteria	Alphaproteobacteria	NaV	NaV	NaV	Alphaproteobacteria bacterium PA4
UP000315636	910412	3293	Melghirimyces algeriensis	Bacteria	Firmicutes	Bacilli	Bacillales	Thermoactinomycetaceae	Melghirimyces	Melghirimyces algeriensis
UP000051562	53254	4956	Bosea thiooxidans	Bacteria	Proteobacteria	Alphaproteobacteria	Rhizobiales	Bradyrhizobiaceae	Bosea	Bosea thiooxidans
UP000199494	530584	6551	Prauserella marina	Bacteria	Actinobacteria	Actinobacteria	Pseudonocardiales	Pseudonocardiaceae	Prauserella	Prauserella marina
UP000018136	1262848	1860	Clostridium sp. CAG:964	Bacteria	Firmicutes	Clostridia	Clostridiales	Clostridiaceae	Clostridium	Clostridium sp. CAG:964
UP000018023	1262777	1994	Clostridium sp. CAG:167	Bacteria	Firmicutes	Clostridia	Clostridiales	Clostridiaceae	Clostridium	Clostridium sp. CAG:167
UP000249870	1912928	972	Candidatus Gracilibacteria bacterium GN02-872	Bacteria	Candidatus Gracilibacteria	NaV	NaV	NaV	NaV	Candidatus Gracilibacteria bacterium GN02-872
UP000240636	77917	2187	Fusobacterium naviforme	Bacteria	Fusobacteria	Fusobacteriia	Fusobacteriales	Fusobacteriaceae	Fusobacterium	Fusobacterium naviforme
UP000246014	2175803	1767	Bacteroidetes bacterium SCGC AAA795-G10	Bacteria	Bacteroidetes	NaV	NaV	NaV	NaV	Bacteroidetes bacterium SCGC AAA795-G10
UP000239480	1280846	4715	Pseudoruegeria haliotis	Bacteria	Proteobacteria	Alphaproteobacteria	Rhodobacterales	Rhodobacteraceae	Pseudoruegeria	Pseudoruegeria haliotis
UP000199687	531814	3985	Gracilibacillus ureilyticus	Bacteria	Firmicutes	Bacilli	Bacillales	Bacillaceae	Gracilibacillus	Gracilibacillus ureilyticus
UP000076066	1549855	2130	Haematospirillum jordaniae	Bacteria	Proteobacteria	Alphaproteobacteria	Rhodospirillales	Rhodospirillaceae	Haematospirillum	Haematospirillum jordaniae
UP000256763	351052	3993	Alkalilimnicola ehrlichii	Bacteria	Proteobacteria	Gammaproteobacteria	Chromatiales	Ectothiorhodospiraceae	Alkalilimnicola	Alkalilimnicola ehrlichii
UP000035709	1600	1612	Lactobacillus acetotolerans	Bacteria	Firmicutes	Bacilli	Lactobacillales	Lactobacillaceae	Lactobacillus	Lactobacillus acetotolerans
UP000293145	2510647	3341	Salipiger sp. IMCC34102	Bacteria	Proteobacteria	Alphaproteobacteria	Rhodobacterales	Rhodobacteraceae	Salipiger	Salipiger sp. IMCC34102
UP000275373	2486473	2771	Muribaculaceae bacterium Isolate-110 (HZI)	Bacteria	Bacteroidetes	Bacteroidia	Bacteroidales	Muribaculaceae	NaV	Muribaculaceae bacterium Isolate-110 (HZI)
UP000183895	1150389	2681	Flavobacteriaceae bacterium UJ101	Bacteria	Bacteroidetes	Flavobacteriia	Flavobacteriales	Flavobacteriaceae	NaV	Flavobacteriaceae bacterium UJ101
UP000317204	2593649	4070	Aliiglaciecola sp. M165	Bacteria	Proteobacteria	Gammaproteobacteria	Alteromonadales	Alteromonadaceae	Aliiglaciecola	Aliiglaciecola sp. M165
UP000053923	68262	9110	Streptomyces regalis	Bacteria	Actinobacteria	Actinobacteria	Streptomycetales	Streptomycetaceae	Streptomyces	Streptomyces regalis
UP000017936	1262955	2331	Ruminococcus sp. CAG:353	Bacteria	Firmicutes	Clostridia	Clostridiales	Ruminococcaceae	Ruminococcus	Ruminococcus sp. CAG:353
UP000004001	679189	2202	Prevotella timonensis CRIS 5C-B1	Bacteria	Bacteroidetes	Bacteroidia	Bacteroidales	Prevotellaceae	Prevotella	Prevotella timonensis
UP000234529	2065820	2220	Hydrogenovibrio sp. SC-1	Bacteria	Proteobacteria	Gammaproteobacteria	Thiotrichales	Piscirickettsiaceae	Hydrogenovibrio	Hydrogenovibrio sp. SC-1
UP000265509	2283635	3770	Halioglobus sp. U0301	Bacteria	Proteobacteria	Gammaproteobacteria	Cellvibrionales	Halieaceae	Halioglobus	Halioglobus sediminis
UP000002030	525903	1737	Thermanaerovibrio acidaminovorans (strain ATCC 49978 / DSM 6589 / Su883) (Selenomonas acidaminovorans)	Bacteria	Synergistetes	Synergistia	Synergistales	Synergistaceae	Thermanaerovibrio	Thermanaerovibrio acidaminovorans
UP000006468	714995	3303	Komagataeibacter hansenii ATCC 23769	Bacteria	Proteobacteria	Alphaproteobacteria	Rhodospirillales	Acetobacteraceae	Komagataeibacter	Komagataeibacter hansenii
UP000295504	1734049	2966	Serpentinicella alkaliphila	Bacteria	Firmicutes	Clostridia	Clostridiales	Clostridiaceae	Serpentinicella	Serpentinicella alkaliphila
UP000001544	398511	4310	Bacillus pseudofirmus (strain OF4)	Bacteria	Firmicutes	Bacilli	Bacillales	Bacillaceae	Bacillus	Bacillus pseudofirmus
UP000031928	1224162	2547	Corynebacterium marinum DSM 44953	Bacteria	Actinobacteria	Actinobacteria	Corynebacteriales	Corynebacteriaceae	Corynebacterium	Corynebacterium marinum
UP000297458	2555897	3369	Jeotgalibacillus sp. R-1-5s-1	Bacteria	Firmicutes	Bacilli	Bacillales	Planococcaceae	Jeotgalibacillus	Jeotgalibacillus sp. R-1-5s-1
UP000068029	1725411	8721	Streptomyces sp. CdTB01	Bacteria	Actinobacteria	Actinobacteria	Streptomycetales	Streptomycetaceae	Streptomyces	Streptomyces sp. CdTB01
UP000010367	56110	5755	Oscillatoria acuminata PCC 6304	Bacteria	Cyanobacteria	NaV	Oscillatoriales	Oscillatoriaceae	Oscillatoria	Oscillatoria acuminata
UP000051495	1736322	3888	Nocardioides sp. Leaf285	Bacteria	Actinobacteria	Actinobacteria	Propionibacteriales	Nocardioidaceae	Nocardioides	Nocardioides sp. Leaf285
UP000199206	1166340	3624	Sphingomonas sp. S6-262	Bacteria	Proteobacteria	Alphaproteobacteria	Sphingomonadales	Sphingomonadaceae	Sphingomonas	Sphingomonas sp. S6-262
UP000195781	1232426	1896	[Collinsella] massiliensis	Bacteria	Actinobacteria	Coriobacteriia	Coriobacteriales	Coriobacteriaceae	Enorma	[Collinsella] massiliensis
UP000199801	1965627	2948	Lachnoclostridium sp. An298	Bacteria	Firmicutes	Clostridia	Clostridiales	Lachnospiraceae	Lachnoclostridium	Lachnoclostridium sp. An298
UP000184536	1121919	3760	Geosporobacter subterraneus DSM 17957	Bacteria	Firmicutes	Clostridia	Clostridiales	Clostridiaceae	Geosporobacter	Geosporobacter subterraneus
UP000031631	1076588	2824	Thiolapillus brandeum	Bacteria	Proteobacteria	Gammaproteobacteria	NaV	NaV	Thiolapillus	Thiolapillus brandeum
UP000199656	408074	5564	Chitinophaga terrae Kim and Jung 2007	Bacteria	Bacteroidetes	Chitinophagia	Chitinophagales	Chitinophagaceae	Chitinophaga	Chitinophaga terrae Kim and Jung 2007
UP000196053	1679721	2352	Herbinix luporum	Bacteria	Firmicutes	Clostridia	Clostridiales	Lachnospiraceae	Herbinix	Herbinix luporum
UP000005711	596330	1588	Peptoniphilus lacrimalis 315-B	Bacteria	Firmicutes	Tissierellia	Tissierellales	Peptoniphilaceae	Peptoniphilus	Peptoniphilus lacrimalis
UP000267239	2082188	4878	Sphingobium sp. YG1	Bacteria	Proteobacteria	Alphaproteobacteria	Sphingomonadales	Sphingomonadaceae	Sphingobium	Sphingobium sp. YG1
UP000199681	995038	3509	Cryobacterium levicorallinum	Bacteria	Actinobacteria	Actinobacteria	Micrococcales	Microbacteriaceae	Cryobacterium	Cryobacterium levicorallinum
UP000032726	516051	2882	Muricauda lutaonensis	Bacteria	Bacteroidetes	Flavobacteriia	Flavobacteriales	Flavobacteriaceae	Muricauda	Muricauda lutaonensis
UP000002198	257309	2265	Corynebacterium diphtheriae (strain ATCC 700971 / NCTC 13129 / Biotype gravis)	Bacteria	Actinobacteria	Actinobacteria	Corynebacteriales	Corynebacteriaceae	Corynebacterium	Corynebacterium diphtheriae
UP000037395	1894	7620	Kitasatospora aureofaciens (Streptomyces aureofaciens)	Bacteria	Actinobacteria	Actinobacteria	Streptomycetales	Streptomycetaceae	Kitasatospora	Kitasatospora aureofaciens
UP000003584	1150591	4272	Mycobacterium xenopi RIVM700367	Bacteria	Actinobacteria	Actinobacteria	Corynebacteriales	Mycobacteriaceae	Mycobacterium	Mycobacterium xenopi
UP000002608	398579	4181	Shewanella pealeana (strain ATCC 700345 / ANG-SQ1)	Bacteria	Proteobacteria	Gammaproteobacteria	Alteromonadales	Shewanellaceae	Shewanella	Shewanella pealeana
UP000078138	980563	4368	Methylosinus sp. R-45379	Bacteria	Proteobacteria	Alphaproteobacteria	Rhizobiales	Methylocystaceae	Methylosinus	Methylosinus sp. R-45379
UP000019023	694431	1825	Desulfurella acetivorans A63	Bacteria	Proteobacteria	Deltaproteobacteria	Desulfurellales	Desulfurellaceae	Desulfurella	Desulfurella acetivorans
UP000185889	1775951	3157	Agromyces sp. NDB4Y10	Bacteria	Actinobacteria	Actinobacteria	Micrococcales	Microbacteriaceae	Agromyces	Agromyces sp. NDB4Y10
UP000094094	47763	6848	Streptomyces lydicus	Bacteria	Actinobacteria	Actinobacteria	Streptomycetales	Streptomycetaceae	Streptomyces	Streptomyces lydicus
UP000002015	425104	4493	Shewanella sediminis (strain HAW-EB3)	Bacteria	Proteobacteria	Gammaproteobacteria	Alteromonadales	Shewanellaceae	Shewanella	Shewanella sediminis
UP000009226	868595	2620	Desulfotomaculum nigrificans (strain DSM 14880 / VKM B-2319 / CO-1-SRB) (Desulfotomaculum carboxydivorans)	Bacteria	Firmicutes	Clostridia	Clostridiales	Peptococcaceae	Desulfotomaculum	Desulfotomaculum nigrificans
UP000017926	1262819	1118	Clostridium sp. CAG:557	Bacteria	Firmicutes	Clostridia	Clostridiales	Clostridiaceae	Clostridium	Clostridium sp. CAG:557
UP000277671	589240	7409	Micromonospora pisi	Bacteria	Actinobacteria	Actinobacteria	Micromonosporales	Micromonosporaceae	Micromonospora	Micromonospora pisi
UP000189646	1945512	3892	Cellvibrio sp. PSBB023	Bacteria	Proteobacteria	Gammaproteobacteria	Cellvibrionales	Cellvibrionaceae	Cellvibrio	Cellvibrio sp. PSBB023
UP000234328	2045209	3981	Pusillimonas sp. JR1/69-2-13	Bacteria	Proteobacteria	Betaproteobacteria	Burkholderiales	Alcaligenaceae	Pusillimonas	Pusillimonas sp. JR1/69-2-13
UP000009874	883126	5096	Massilia timonae CCUG 45783	Bacteria	Proteobacteria	Betaproteobacteria	Burkholderiales	Oxalobacteraceae	Massilia	Massilia timonae
UP000018365	1262869	1809	Dialister sp. CAG:357	Bacteria	Firmicutes	Negativicutes	Veillonellales	Veillonellaceae	Dialister	Dialister sp. CAG:357
UP000053051	1165094	2278	Richelia intracellularis HH01	Bacteria	Cyanobacteria	NaV	Nostocales	Nostocaceae	Richelia	Richelia intracellularis
UP000190748	1881060	2435	Clostridium sp. USBA 49	Bacteria	Firmicutes	Clostridia	Clostridiales	Clostridiaceae	Clostridium	Clostridium sp. USBA 49
UP000032233	1429043	5388	Dethiosulfatarculus sandiegensis	Bacteria	Proteobacteria	Deltaproteobacteria	Desulfarculales	Desulfarculaceae	Dethiosulfatarculus	Dethiosulfatarculus sandiegensis
UP000315750	2527972	5127	Planctomycetes bacterium Pan181	Bacteria	Planctomycetes	NaV	NaV	NaV	NaV	Planctomycetes bacterium Pan181
UP000027439	1071679	5937	Caballeronia grimmiae	Bacteria	Proteobacteria	Betaproteobacteria	Burkholderiales	Burkholderiaceae	Caballeronia	Caballeronia grimmiae
UP000053944	1527299	787	Psychromonas sp. PRT-SC03	Bacteria	Proteobacteria	Gammaproteobacteria	Alteromonadales	Psychromonadaceae	Psychromonas	Psychromonas sp. PRT-SC03
UP000051621	1423731	2051	Lactobacillus capillatus DSM 19910	Bacteria	Firmicutes	Bacilli	Lactobacillales	Lactobacillaceae	Lactobacillus	Lactobacillus capillatus
UP000277032	2419505	2178	Kocuria sp. HSID16901	Bacteria	Actinobacteria	Actinobacteria	Micrococcales	Micrococcaceae	Kocuria	Kocuria sp. HSID16901
UP000247602	429133	4717	Modestobacter versicolor	Bacteria	Actinobacteria	Actinobacteria	Geodermatophilales	Geodermatophilaceae	Modestobacter	Modestobacter versicolor
UP000033569	1609137	5663	Streptomyces sp. NRRL F-4428	Bacteria	Actinobacteria	Actinobacteria	Streptomycetales	Streptomycetaceae	Streptomyces	Streptomyces sp. NRRL F-4428
UP000185911	1111071	4231	Rhodoferax antarcticus ANT.BR	Bacteria	Proteobacteria	Betaproteobacteria	Burkholderiales	Comamonadaceae	Rhodoferax	Rhodoferax antarcticus
UP000192569	698762	3229	Thermanaeromonas toyohensis ToBE	Bacteria	Firmicutes	Clostridia	Thermoanaerobacterales	Thermoanaerobacteraceae	Thermanaeromonas	Thermanaeromonas toyohensis
UP000001168	66692	4082	Bacillus clausii (strain KSM-K16)	Bacteria	Firmicutes	Bacilli	Bacillales	Bacillaceae	Bacillus	Bacillus clausii
UP000001806	107806	572	Buchnera aphidicola subsp. Acyrthosiphon pisum (strain APS) (Acyrthosiphon pisum symbiotic bacterium)	Bacteria	Proteobacteria	Gammaproteobacteria	Enterobacterales	Erwiniaceae	Buchnera	Buchnera aphidicola
UP000001203	43989	5239	Crocosphaera subtropica (strain ATCC 51142 / BH68) (Cyanothece sp. (strain ATCC 51142))	Bacteria	Cyanobacteria	NaV	Chroococcales	Aphanothecaceae	Crocosphaera	Crocosphaera subtropica
UP000059222	325775	536	Coxiella endosymbiont of Amblyomma americanum	Bacteria	Proteobacteria	Gammaproteobacteria	Legionellales	Coxiellaceae	Coxiella	Coxiella endosymbiont of Amblyomma americanum
UP000279959	135719	3954	Sphingobium amiense	Bacteria	Proteobacteria	Alphaproteobacteria	Sphingomonadales	Sphingomonadaceae	Sphingobium	Sphingobium amiense
UP000251800	2182787	3331	Abyssibacter profundi	Bacteria	Proteobacteria	Gammaproteobacteria	Salinisphaerales	Salinisphaeraceae	Abyssibacter	Abyssibacter profundi
UP000294555	2529856	5491	Sodalis sp. 159R	Bacteria	Proteobacteria	Gammaproteobacteria	Enterobacterales	Pectobacteriaceae	Sodalis	Sodalis sp. 159R
UP000198961	343232	1523	methanotrophic endosymbiont of Bathymodiolus azoricus (Menez Gwen)	Bacteria	NaV	NaV	NaV	NaV	NaV	methanotrophic endosymbiont of Bathymodiolus azoricus (Menez Gwen)
UP000305401	2498093	2214	Muribaculaceae bacterium	Bacteria	Bacteroidetes	Bacteroidia	Bacteroidales	Muribaculaceae	NaV	Muribaculaceae bacterium
UP000051864	1729724	4032	Pseudomonas sp. TTU2014-080ASC	Bacteria	Proteobacteria	Gammaproteobacteria	Pseudomonadales	Pseudomonadaceae	Pseudomonas	Pseudomonas sp. TTU2014-080ASC
UP000243591	2756	2406	Brochothrix thermosphacta (Microbacterium thermosphactum)	Bacteria	Firmicutes	Bacilli	Bacillales	Listeriaceae	Brochothrix	Brochothrix thermosphacta
UP000278222	94	5422	Stella humosa	Bacteria	Proteobacteria	Alphaproteobacteria	Rhodospirillales	Acetobacteraceae	Stella	Stella humosa
UP000002008	324602	3850	Chloroflexus aurantiacus (strain ATCC 29366 / DSM 635 / J-10-fl)	Bacteria	Chloroflexi	Chloroflexia	Chloroflexales	Chloroflexaceae	Chloroflexus	Chloroflexus aurantiacus
UP000196588	1965576	3242	Pseudoflavonifractor sp. An184	Bacteria	Firmicutes	Clostridia	Clostridiales	Ruminococcaceae	Pseudoflavonifractor	Pseudoflavonifractor sp. An184
UP000247634	1885	7068	Streptomyces actuosus	Bacteria	Actinobacteria	Actinobacteria	Streptomycetales	Streptomycetaceae	Streptomyces	Streptomyces actuosus
UP000198556	137733	1916	Granulicatella balaenopterae	Bacteria	Firmicutes	Bacilli	Lactobacillales	Carnobacteriaceae	Granulicatella	Granulicatella balaenopterae
UP000282837	1908524	3564	Novosphingobium sp. FSY-9	Bacteria	Proteobacteria	Alphaproteobacteria	Sphingomonadales	Sphingomonadaceae	Novosphingobium	Novosphingobium sp. FSY-9
UP000004162	377431	2158	Chlorobium ferrooxidans DSM 13031	Bacteria	Chlorobi	Chlorobia	Chlorobiales	Chlorobiaceae	Chlorobium	Chlorobium ferrooxidans
UP000266369	2305464	3551	Colwellia sp. RSH04	Bacteria	Proteobacteria	Gammaproteobacteria	Alteromonadales	Colwelliaceae	Colwellia	Colwellia sp. RSH04
UP000244064	2161748	3682	Pseudomonas sp. TC-11	Bacteria	Proteobacteria	Gammaproteobacteria	Pseudomonadales	Pseudomonadaceae	Pseudomonas	Pseudomonas sp. TC-11
UP000001691	471821	767	Uncultured termite group 1 bacterium phylotype Rs-D17	Bacteria	Elusimicrobia	NaV	NaV	NaV	NaV	uncultured Termite group 1 bacterium
UP000271678	2294115	3842	Flexivirga sp. BO-16	Bacteria	Actinobacteria	Actinobacteria	Micrococcales	Dermacoccaceae	Flexivirga	Flexivirga sp. BO-16
UP000004528	585506	1952	Weissella paramesenteroides ATCC 33313	Bacteria	Firmicutes	Bacilli	Lactobacillales	Leuconostocaceae	Weissella	Weissella paramesenteroides
UP000199202	633440	10809	Nonomuraea jiangxiensis	Bacteria	Actinobacteria	Actinobacteria	Streptosporangiales	Streptosporangiaceae	Nonomuraea	Nonomuraea jiangxiensis
UP000269438	76637	3070	Mycetocola lacteus	Bacteria	Actinobacteria	Actinobacteria	Micrococcales	Microbacteriaceae	Mycetocola	Mycetocola lacteus
UP000018378	1262949	2482	Roseburia sp. CAG:50	Bacteria	Firmicutes	Clostridia	Clostridiales	Lachnospiraceae	Roseburia	Roseburia sp. CAG:50
UP000298650	2489212	3028	Microbacterium sp. RG1	Bacteria	Actinobacteria	Actinobacteria	Micrococcales	Microbacteriaceae	Microbacterium	Microbacterium sp. RG1
UP000002914	391619	3853	Phaeobacter inhibens (strain ATCC 700781 / DSM 17395 / CIP 105210 / JCM 21319 / NBRC 16654 / NCIMB 13546 / BS107)	Bacteria	Proteobacteria	Alphaproteobacteria	Rhodobacterales	Rhodobacteraceae	Phaeobacter	Phaeobacter inhibens
UP000181936	1547283	3944	Bacillus weihaiensis	Bacteria	Firmicutes	Bacilli	Bacillales	Bacillaceae	Bacillus	Bacillus weihaiensis
UP000273119	2676123	2599	Galactobacter caseinivorans	Bacteria	Actinobacteria	Actinobacteria	Micrococcales	Micrococcaceae	Galactobacter	Galactobacter caseinivorans
UP000035352	413882	5541	[Polyangium] brachysporum	Bacteria	Proteobacteria	Betaproteobacteria	Burkholderiales	NaV	NaV	[Polyangium] brachysporum
UP000198362	560556	8104	Asanoa hainanensis	Bacteria	Actinobacteria	Actinobacteria	Micromonosporales	Micromonosporaceae	Asanoa	Asanoa hainanensis
UP000320031	935844	4501	Nocardioides sp. J9	Bacteria	Actinobacteria	Actinobacteria	Propionibacteriales	Nocardioidaceae	Nocardioides	Nocardioides sp. J9
UP000198573	1855299	2711	Oscillibacter sp. PC13	Bacteria	Firmicutes	Clostridia	Clostridiales	Oscillospiraceae	Oscillibacter	Oscillibacter sp. PC13
UP000027983	484770	4754	Pelosinus sp. UFO1	Bacteria	Firmicutes	Negativicutes	Selenomonadales	Sporomusaceae	Pelosinus	Pelosinus sp. UFO1
UP000247866	1449167	673	Epsilonproteobacteria bacterium SCGC AD-308-I21	Bacteria	Proteobacteria	Epsilonproteobacteria	NaV	NaV	NaV	Epsilonproteobacteria bacterium SCGC AD-308-I21
UP000051931	1122152	1327	Lactobacillus psittaci DSM 15354	Bacteria	Firmicutes	Bacilli	Lactobacillales	Lactobacillaceae	Lactobacillus	Lactobacillus psittaci
UP000231916	2020324	7508	Streptomyces sp. CB01201	Bacteria	Actinobacteria	Actinobacteria	Streptomycetales	Streptomycetaceae	Streptomyces	Streptomyces sp. CB01201
UP000027583	1382230	3273	Asaia platycodi SF2.1	Bacteria	Proteobacteria	Alphaproteobacteria	Rhodospirillales	Acetobacteraceae	Asaia	Asaia platycodi
UP000005143	1097667	4372	Patulibacter medicamentivorans	Bacteria	Actinobacteria	Thermoleophilia	Solirubrobacterales	Patulibacteraceae	Patulibacter	Patulibacter medicamentivorans
UP000032633	1126833	4723	Paenibacillus beijingensis	Bacteria	Firmicutes	Bacilli	Bacillales	Paenibacillaceae	Paenibacillus	Paenibacillus beijingensis
UP000094849	1818881	3951	Candidatus Thiodiazotropha endoloripes	Bacteria	Proteobacteria	Gammaproteobacteria	NaV	NaV	Candidatus Thiodiazotropha	Candidatus Thiodiazotropha endoloripes
UP000011126	436113	372	Mycoplasma mycoides subsp. capri str. GM12	Bacteria	Tenericutes	Mollicutes	Mycoplasmatales	Mycoplasmataceae	Mycoplasma	Mycoplasma mycoides
UP000032668	1120923	3751	Acidocella aminolytica 101 = DSM 11237	Bacteria	Proteobacteria	Alphaproteobacteria	Rhodospirillales	Acetobacteraceae	Acidocella	Acidocella aminolytica
UP000275245	61645	4511	Enterobacter asburiae	Bacteria	Proteobacteria	Gammaproteobacteria	Enterobacterales	Enterobacteriaceae	Enterobacter	Enterobacter asburiae
UP000199074	429728	3590	Devosia crocina	Bacteria	Proteobacteria	Alphaproteobacteria	Rhizobiales	Hyphomicrobiaceae	Devosia	Devosia crocina
UP000194216	1985172	3925	Sphingomonas sp. IBVSS2	Bacteria	Proteobacteria	Alphaproteobacteria	Sphingomonadales	Sphingomonadaceae	Sphingomonas	Sphingomonas sp. IBVSS2
UP000245921	515440	2638	Oceanotoga teriensis	Bacteria	Thermotogae	Thermotogae	Thermotogales	Thermotogaceae	Oceanotoga	Oceanotoga teriensis
UP000063234	1298851	1756	Thermosulfidibacter takaii (strain DSM 17441 / JCM 13301 / NBRC 103674 / ABI70S6)	Bacteria	Aquificae	Aquificae	Aquificales	NaV	Thermosulfidibacter	Thermosulfidibacter takaii
UP000266482	393251	5258	Paenibacillus nanensis	Bacteria	Firmicutes	Bacilli	Bacillales	Paenibacillaceae	Paenibacillus	Paenibacillus nanensis
UP000014461	1331007	4397	Agarivorans albus MKT 106	Bacteria	Proteobacteria	Gammaproteobacteria	Alteromonadales	Alteromonadaceae	Agarivorans	Agarivorans albus
UP000185469	1437874	1827	Corynebacterium sphenisci DSM 44792	Bacteria	Actinobacteria	Actinobacteria	Corynebacteriales	Corynebacteriaceae	Corynebacterium	Corynebacterium sphenisci
UP000199534	400055	2844	Robiginitalea myxolifaciens	Bacteria	Bacteroidetes	Flavobacteriia	Flavobacteriales	Flavobacteriaceae	Robiginitalea	Robiginitalea myxolifaciens
UP000003627	701176	4028	Vibrio sp. (strain N418)	Bacteria	Proteobacteria	Gammaproteobacteria	Vibrionales	Vibrionaceae	Vibrio	Vibrio sp. N418
UP000184139	1121409	4455	Desulfofustis glycolicus DSM 9705	Bacteria	Proteobacteria	Deltaproteobacteria	Desulfobacterales	Desulfobulbaceae	Desulfofustis	Desulfofustis glycolicus
UP000033484	1609133	7273	Streptomyces sp. NRRL S-495	Bacteria	Actinobacteria	Actinobacteria	Streptomycetales	Streptomycetaceae	Streptomyces	Streptomyces sp. NRRL S-495
UP000190188	1324314	6187	Paenibacillus selenitireducens	Bacteria	Firmicutes	Bacilli	Bacillales	Paenibacillaceae	Paenibacillus	Paenibacillus selenitireducens
UP000183299	576117	3717	Celeribacter halophilus	Bacteria	Proteobacteria	Alphaproteobacteria	Rhodobacterales	Rhodobacteraceae	Celeribacter	Celeribacter halophilus
UP000198348	664784	4481	Haloechinothrix alba	Bacteria	Actinobacteria	Actinobacteria	Pseudonocardiales	Pseudonocardiaceae	Haloechinothrix	Haloechinothrix alba
UP000054023	317018	2504	Nesterenkonia jeotgali	Bacteria	Actinobacteria	Actinobacteria	Micrococcales	Micrococcaceae	Nesterenkonia	Nesterenkonia jeotgali
UP000060713	1705566	4632	Bacillus sp. FJAT-18017	Bacteria	Firmicutes	Bacilli	Bacillales	Bacillaceae	Bacillus	Bacillus sp. FJAT-18017
UP000006177	1048260	2450	Leptospirillum ferriphilum (strain ML-04)	Bacteria	Nitrospirae	Nitrospira	Nitrospirales	Nitrospiraceae	Leptospirillum	Leptospirillum ferriphilum
UP000036045	1397	4949	Bacillus circulans	Bacteria	Firmicutes	Bacilli	Bacillales	Bacillaceae	Bacillus	Bacillus circulans
UP000038011	1514904	3161	Ahrensia marina	Bacteria	Proteobacteria	Alphaproteobacteria	Rhodobacterales	Rhodobacteraceae	Ahrensia	Ahrensia marina
UP000018359	1262929	2171	Prevotella sp. CAG:520	Bacteria	Bacteroidetes	Bacteroidia	Bacteroidales	Prevotellaceae	Prevotella	Prevotella sp. CAG:520
UP000288794	1490476	3521	Pantoea sp. LMG 27579	Bacteria	Proteobacteria	Gammaproteobacteria	Enterobacterales	Erwiniaceae	Pantoea	Pantoea sp. LMG 27579
UP000312852	2584466	4486	Mesorhizobium sp. 8	Bacteria	Proteobacteria	Alphaproteobacteria	Rhizobiales	Phyllobacteriaceae	Mesorhizobium	Mesorhizobium sp. 8
UP000017642	1400053	2289	Bacteroidales bacterium CF	Bacteria	Bacteroidetes	Bacteroidia	Bacteroidales	NaV	NaV	Bacteroidales bacterium CF
UP000016307	1160719	1962	Cutibacterium granulosum DSM 20700	Bacteria	Actinobacteria	Actinobacteria	Propionibacteriales	Propionibacteriaceae	Cutibacterium	Cutibacterium granulosum
UP000257067	45498	1316	Helicobacter cholecystus	Bacteria	Proteobacteria	Epsilonproteobacteria	Campylobacterales	Helicobacteraceae	Helicobacter	Helicobacter cholecystus
UP000285190	2320862	4168	Herbaspirillum sp. K2R10-39	Bacteria	Proteobacteria	Betaproteobacteria	Burkholderiales	Oxalobacteraceae	Herbaspirillum	Herbaspirillum sp. K2R10-39
UP000018193	1262847	1350	Clostridium sp. CAG:921	Bacteria	Firmicutes	Clostridia	Clostridiales	Clostridiaceae	Clostridium	Clostridium sp. CAG:921
UP000315711	688079	3479	Bacillus nanhaiisediminis	Bacteria	Firmicutes	Bacilli	Bacillales	Bacillaceae	Bacillus	Bacillus nanhaiisediminis
UP000018374	1262839	1194	Clostridium sp. CAG:780	Bacteria	Firmicutes	Clostridia	Clostridiales	Clostridiaceae	Clostridium	Clostridium sp. CAG:780
UP000053688	1236703	853	Candidatus Photodesmus katoptron Akat1	Bacteria	Proteobacteria	Gammaproteobacteria	Vibrionales	Vibrionaceae	Candidatus Photodesmus	Candidatus Photodesmus katoptron
UP000198754	1855348	9510	Streptomyces sp. 3213.3	Bacteria	Actinobacteria	Actinobacteria	Streptomycetales	Streptomycetaceae	Streptomyces	Streptomyces sp. 3213.3
UP000243861	1449181	456	Epsilonproteobacteria bacterium SCGC AD-311-E16	Bacteria	Proteobacteria	Epsilonproteobacteria	NaV	NaV	NaV	Epsilonproteobacteria bacterium SCGC AD-311-E16
UP000239209	439699	7729	Pseudosporangium ferrugineum	Bacteria	Actinobacteria	Actinobacteria	Micromonosporales	Micromonosporaceae	Pseudosporangium	Pseudosporangium ferrugineum
UP000002805	457429	6866	Streptomyces pristinaespiralis (strain ATCC 25486 / DSM 40338 / CBS 914.69 / JCM 4507 / NBRC 13074 / NRRL 2958 / 5647)	Bacteria	Actinobacteria	Actinobacteria	Streptomycetales	Streptomycetaceae	Streptomyces	Streptomyces pristinaespiralis
UP000236624	2035430	609	bacterium HR35	Bacteria	NaV	NaV	NaV	NaV	NaV	bacterium HR35
UP000018458	762983	2169	Succinatimonas hippei (strain DSM 22608 / JCM 16073 / KCTC 15190 / YIT 12066)	Bacteria	Proteobacteria	Gammaproteobacteria	Aeromonadales	Succinivibrionaceae	Succinatimonas	Succinatimonas hippei
UP000000593	298386	5328	Photobacterium profundum (strain SS9)	Bacteria	Proteobacteria	Gammaproteobacteria	Vibrionales	Vibrionaceae	Photobacterium	Photobacterium profundum
UP000002572	653733	2551	Desulfurispirillum indicum (strain ATCC BAA-1389 / S5)	Bacteria	Chrysiogenetes	Chrysiogenetes	Chrysiogenales	Chrysiogenaceae	Desulfurispirillum	Desulfurispirillum indicum
UP000269289	2483352	4017	Cellulomonas sp. NEAU-YY56	Bacteria	Actinobacteria	Actinobacteria	Micrococcales	Cellulomonadaceae	Cellulomonas	Cellulomonas sp. NEAU-YY56
UP000242679	1449348	4266	Mesorhizobium amorphae CCBAU 01583	Bacteria	Proteobacteria	Alphaproteobacteria	Rhizobiales	Phyllobacteriaceae	Mesorhizobium	Mesorhizobium amorphae
UP000244905	2094150	2703	Duncaniella muris	Bacteria	Bacteroidetes	Bacteroidia	Bacteroidales	Muribaculaceae	Duncaniella	Duncaniella muris
UP000004289	658655	3188	Lachnospiraceae bacterium 1_4_56FAA	Bacteria	Firmicutes	Clostridia	Clostridiales	Lachnospiraceae	NaV	Lachnospiraceae bacterium 1_4_56FAA
UP000295645	242606	3849	Luteibacter rhizovicinus	Bacteria	Proteobacteria	Gammaproteobacteria	Xanthomonadales	Rhodanobacteraceae	Luteibacter	Luteibacter rhizovicinus
UP000236743	1036778	5472	Bosea lathyri	Bacteria	Proteobacteria	Alphaproteobacteria	Rhizobiales	Bradyrhizobiaceae	Bosea	Bosea lathyri
UP000006974	1078483	1985	Haemophilus sputorum HK 2154	Bacteria	Proteobacteria	Gammaproteobacteria	Pasteurellales	Pasteurellaceae	Haemophilus	Haemophilus sputorum
UP000252770	2268447	3682	Desertihabitans brevis	Bacteria	Actinobacteria	Actinobacteria	Propionibacteriales	Propionibacteriaceae	Desertihabitans	Desertihabitans brevis
UP000094342	1752398	5296	Ensifer alkalisoli	Bacteria	Proteobacteria	Alphaproteobacteria	Rhizobiales	Rhizobiaceae	Ensifer	Ensifer alkalisoli
UP000182005	1502758	3582	Luteibacter sp. UNCMF366Tsu5.1	Bacteria	Proteobacteria	Gammaproteobacteria	Xanthomonadales	Rhodanobacteraceae	Luteibacter	Luteibacter sp. UNCMF366Tsu5.1
UP000243476	1945857	3837	Polaromonas sp. C04	Bacteria	Proteobacteria	Betaproteobacteria	Burkholderiales	Comamonadaceae	Polaromonas	Polaromonas sp. C04
UP000011124	546271	2243	Selenomonas sputigena (strain ATCC 35185 / DSM 20758 / VPI D19B-28)	Bacteria	Firmicutes	Negativicutes	Selenomonadales	Selenomonadaceae	Selenomonas	Selenomonas sputigena
UP000004358	314230	6010	Blastopirellula marina DSM 3645	Bacteria	Planctomycetes	Planctomycetia	Pirellulales	Pirellulaceae	Blastopirellula	Blastopirellula marina
UP000306985	2576308	4268	Nakamurella sp. N5BH11	Bacteria	Actinobacteria	Actinobacteria	Nakamurellales	Nakamurellaceae	Nakamurella	Nakamurella flava
UP000036700	445709	3963	Pandoraea thiooxydans	Bacteria	Proteobacteria	Betaproteobacteria	Burkholderiales	Burkholderiaceae	Pandoraea	Pandoraea thiooxydans
UP000315673	1813879	3225	Sphingomonas sp. HKS19	Bacteria	Proteobacteria	Alphaproteobacteria	Sphingomonadales	Sphingomonadaceae	Sphingomonas	Sphingomonas sp. HKS19
UP000286976	946228	2309	Aliidiomarina taiwanensis	Bacteria	Proteobacteria	Gammaproteobacteria	Alteromonadales	Idiomarinaceae	Aliidiomarina	Aliidiomarina taiwanensis
UP000064912	35806	4359	Rhodovulum sulfidophilum (Rhodobacter sulfidophilus)	Bacteria	Proteobacteria	Alphaproteobacteria	Rhodobacterales	Rhodobacteraceae	Rhodovulum	Rhodovulum sulfidophilum
UP000274033	720633	3831	Lysinibacillus composti	Bacteria	Firmicutes	Bacilli	Bacillales	Bacillaceae	Lysinibacillus	Lysinibacillus composti
UP000321196	664640	2481	Microbacterium mitrae	Bacteria	Actinobacteria	Actinobacteria	Micrococcales	Microbacteriaceae	Microbacterium	Microbacterium mitrae
UP000018170	1262846	1262	Clostridium sp. CAG:914	Bacteria	Firmicutes	Clostridia	Clostridiales	Clostridiaceae	Clostridium	Clostridium sp. CAG:914
UP000292013	2507582	4379	Rhodococcus sp. ABRD24	Bacteria	Actinobacteria	Actinobacteria	Corynebacteriales	Nocardiaceae	Rhodococcus	Rhodococcus sp. ABRD24
UP000253490	645887	2857	Alkalibaculum bacchi	Bacteria	Firmicutes	Clostridia	Clostridiales	Eubacteriaceae	Alkalibaculum	Alkalibaculum bacchi
UP000005551	1189621	3102	Nitritalea halalkaliphila LW7	Bacteria	Bacteroidetes	Cytophagia	Cytophagales	Cyclobacteriaceae	Nitritalea	Nitritalea halalkaliphila
UP000253987	1928331	3437	Marinobacter vulgaris	Bacteria	Proteobacteria	Gammaproteobacteria	Alteromonadales	Alteromonadaceae	Marinobacter	Marinobacter vulgaris
UP000035009	1223542	4269	Gordonia malaquae NBRC 108250	Bacteria	Actinobacteria	Actinobacteria	Corynebacteriales	Gordoniaceae	Gordonia	Gordonia malaquae
UP000092565	60890	3897	Phaeobacter gallaeciensis	Bacteria	Proteobacteria	Alphaproteobacteria	Rhodobacterales	Rhodobacteraceae	Phaeobacter	Phaeobacter gallaeciensis
UP000253034	1297424	4253	Anaerobacterium chartisolvens	Bacteria	Firmicutes	Clostridia	Clostridiales	Hungateiclostridiaceae	Anaerobacterium	Anaerobacterium chartisolvens
UP000193926	1123756	3878	Marivita geojedonensis	Bacteria	Proteobacteria	Alphaproteobacteria	Rhodobacterales	Rhodobacteraceae	Marivita	Marivita geojedonensis
UP000273145	1338368	4362	Paenibacillus lentus	Bacteria	Firmicutes	Bacilli	Bacillales	Paenibacillaceae	Paenibacillus	Paenibacillus lentus
UP000195651	1932694	688	bacterium F16	Bacteria	NaV	NaV	NaV	NaV	NaV	bacterium F16
UP000244896	1796921	2881	Ereboglobus luteus	Bacteria	Verrucomicrobia	Opitutae	Opitutales	Opitutaceae	Ereboglobus	Ereboglobus luteus
UP000051888	157838	4690	Bacillus shackletonii	Bacteria	Firmicutes	Bacilli	Bacillales	Bacillaceae	Bacillus	Bacillus shackletonii
UP000321085	670291	7161	Microvirga aerophila	Bacteria	Proteobacteria	Alphaproteobacteria	Rhizobiales	Methylobacteriaceae	Microvirga	Microvirga aerophila
UP000000535	242231	2106	Neisseria gonorrhoeae (strain ATCC 700825 / FA 1090)	Bacteria	Proteobacteria	Betaproteobacteria	Neisseriales	Neisseriaceae	Neisseria	Neisseria gonorrhoeae
UP000199017	930129	4578	Alteribacillus bidgolensis	Bacteria	Firmicutes	Bacilli	Bacillales	Bacillaceae	Alteribacillus	Alteribacillus bidgolensis
UP000008633	749222	2076	Nitratifractor salsuginis (strain DSM 16511 / JCM 12458 / E9I37-1)	Bacteria	Proteobacteria	Epsilonproteobacteria	Campylobacterales	NaV	Nitratifractor	Nitratifractor salsuginis
UP000018256	1262867	1300	Corallococcus sp. CAG:1435	Bacteria	Proteobacteria	Deltaproteobacteria	Myxococcales	Myxococcaceae	Corallococcus	Corallococcus sp. CAG:1435
UP000017942	1262910	2148	Oscillibacter sp. CAG:155	Bacteria	Firmicutes	Clostridia	Clostridiales	Oscillospiraceae	Oscillibacter	Oscillibacter sp. CAG:155
UP000076923	1333662	3258	Polaribacter atrinae	Bacteria	Bacteroidetes	Flavobacteriia	Flavobacteriales	Flavobacteriaceae	Polaribacter	Polaribacter atrinae
UP000236724	1899563	4918	Thiotrichales bacterium HS_08	Bacteria	Proteobacteria	Gammaproteobacteria	Thiotrichales	NaV	NaV	Thiotrichales bacterium HS_08
UP000253727	2161824	2539	Altererythrobacter sp. HME9302	Bacteria	Proteobacteria	Alphaproteobacteria	Sphingomonadales	Erythrobacteraceae	Altererythrobacter	Altererythrobacter sp. HME9302
UP000008922	926569	3110	Anaerolinea thermophila (strain DSM 14523 / JCM 11388 / NBRC 100420 / UNI-1)	Bacteria	Chloroflexi	Anaerolineae	Anaerolineales	Anaerolineaceae	Anaerolinea	Anaerolinea thermophila
UP000031623	40754	3951	Thioploca ingrica	Bacteria	Proteobacteria	Gammaproteobacteria	Thiotrichales	Thiotrichaceae	Thioploca	Thioploca ingrica
UP000321275	77098	3562	Halomonas pacifica	Bacteria	Proteobacteria	Gammaproteobacteria	Oceanospirillales	Halomonadaceae	Halomonas	Halomonas pacifica
UP000308054	2029849	3306	Marinicauda algicola	Bacteria	Proteobacteria	Alphaproteobacteria	Rhodobacterales	Hyphomonadaceae	Marinicauda	Marinicauda algicola
UP000017997	1262857	1394	Coprobacillus sp. CAG:826	Bacteria	Firmicutes	Erysipelotrichia	Erysipelotrichales	Erysipelotrichaceae	Coprobacillus	Coprobacillus sp. CAG:826
UP000274083	2479851	4280	Stenotrophomonas sp. 278	Bacteria	Proteobacteria	Gammaproteobacteria	Xanthomonadales	Xanthomonadaceae	Stenotrophomonas	Stenotrophomonas sp. 278
UP000018901	880074	2487	Barnesiella viscericola DSM 18177	Bacteria	Bacteroidetes	Bacteroidia	Bacteroidales	Barnesiellaceae	Barnesiella	Barnesiella viscericola
UP000214566	364030	3683	Thiomonas delicata (Thiomonas cuprina)	Bacteria	Proteobacteria	Betaproteobacteria	Burkholderiales	NaV	Thiomonas	Thiomonas delicata
UP000018135	1262699	3141	Anaerostipes sp. CAG:276	Bacteria	Firmicutes	Clostridia	Clostridiales	Lachnospiraceae	Anaerostipes	Anaerostipes sp. CAG:276
UP000001693	395495	4343	Leptothrix cholodnii (strain ATCC 51168 / LMG 8142 / SP-6) (Leptothrix discophora (strain SP-6))	Bacteria	Proteobacteria	Betaproteobacteria	Burkholderiales	NaV	Leptothrix	Leptothrix cholodnii
UP000262405	2292284	3094	Bacteroides sp. OM08-11	Bacteria	Bacteroidetes	Bacteroidia	Bacteroidales	Bacteroidaceae	Bacteroides	Bacteroides sp. OM08-11
UP000037880	1523413	3896	Novosphingobium sp. AAP1	Bacteria	Proteobacteria	Alphaproteobacteria	Sphingomonadales	Sphingomonadaceae	Novosphingobium	Novosphingobium sp. AAP1
UP000003834	88274	6687	delta proteobacterium NaphS2	Bacteria	Proteobacteria	Deltaproteobacteria	NaV	NaV	NaV	delta proteobacterium NaphS2
UP000317332	2567861	3060	Flavobacteriaceae bacterium CWB-1	Bacteria	Bacteroidetes	Flavobacteriia	Flavobacteriales	Flavobacteriaceae	NaV	Flavobacteriaceae bacterium CWB-1
UP000036750	1348163	4217	Desulfocarbo indianensis	Bacteria	Proteobacteria	Deltaproteobacteria	Desulfarculales	Desulfarculaceae	Desulfocarbo	Desulfocarbo indianensis
UP000216732	2022549	5798	Paenibacillus sp. 7516	Bacteria	Firmicutes	Bacilli	Bacillales	Paenibacillaceae	Paenibacillus	Paenibacillus sp. 7516
UP000018116	1262926	2297	Prevotella sp. CAG:474	Bacteria	Bacteroidetes	Bacteroidia	Bacteroidales	Prevotellaceae	Prevotella	Prevotella sp. CAG:474
UP000018120	1262816	2541	Clostridium sp. CAG:510	Bacteria	Firmicutes	Clostridia	Clostridiales	Clostridiaceae	Clostridium	Clostridium sp. CAG:510
UP000252585	930114	3585	Saliterribacillus persicus	Bacteria	Firmicutes	Bacilli	Bacillales	Bacillaceae	Saliterribacillus	Saliterribacillus persicus
[truncated: 5,049 more rows]
