# Supplementary material for: Defining hierarchical protein interaction networks from spectral analysis of bacterial proteomes
Source: eLife. 2022 Aug 17;11:e74104. doi: 10.7554/eLife.74104 (PMC9427106; doi:10.7554/eLife.74104)
Supplement: Figure 3—source data 2. [file elife-74104-fig3-data2.xlsx]

## Sheet: Overview
Figure 3 source data 2: Benchmarks of PPIs in E. coli K12, related to Figure 3A.
Each row in the following sheets is a pair of E. coli K12 proteins that interact in the indicated benchmark.
Sheet	Description
STRING_Nonbinding	Indirect PPIs mined from STRING database
GO	Indirect and direct PPIs mined from GO database
STRING	Indirect and direct PPIs mined from STRING database
CoevPlus	Direct PPIs reported by Cong et al. (Science, 2019)
PDB	Direct PPIs mined from PDB
ECOCYC	Direct PPIs mined from complexes on ECOCYC after excluding large complexes to enrich for direct PPIs.

## Sheet: STRING_Nonbinding
UniprotID_p1	GeneName_p1	UniprotID_p2	GeneName_p2
P0AG55	rplF	P60422	rplB
P0A7R1	rplI	P60422	rplB
P0AG55	rplF	P60438	rplC
P0A7R1	rplI	P60438	rplC
P60422	rplB	P60438	rplC
P0AG55	rplF	P62399	rplE
P60422	rplB	P62399	rplE
P60438	rplC	P62399	rplE
P0A7R1	rplI	P0A7L3	rplT
P60422	rplB	P0A7L3	rplT
P60438	rplC	P0A7L3	rplT
P0A7R1	rplI	Q2EEQ2	ykgO
P60422	rplB	Q2EEQ2	ykgO
P60438	rplC	Q2EEQ2	ykgO
P0A7L3	rplT	Q2EEQ2	ykgO
P0A7R1	rplI	P0A7Q6	rpmJ
P60422	rplB	P0A7Q6	rpmJ
P60438	rplC	P0A7Q6	rpmJ
P0A7L3	rplT	P0A7Q6	rpmJ
P0AG55	rplF	P0ADY7	rplP
P0A7R1	rplI	P0ADY7	rplP
P60422	rplB	P0ADY7	rplP
P60438	rplC	P0ADY7	rplP
P62399	rplE	P0ADY7	rplP
P0A7L3	rplT	P0ADY7	rplP
Q2EEQ2	ykgO	P0ADY7	rplP
P0A7Q6	rpmJ	P0ADY7	rplP
P0A7R1	rplI	P0AG48	rplU
P60422	rplB	P0AG48	rplU
P60438	rplC	P0AG48	rplU
P0A7L3	rplT	P0AG48	rplU
Q2EEQ2	ykgO	P0AG48	rplU
P0A7Q6	rpmJ	P0AG48	rplU
P0ADY7	rplP	P0AG48	rplU
P0A7R1	rplI	P0A7N4	rpmF
P60422	rplB	P0A7N4	rpmF
P60438	rplC	P0A7N4	rpmF
P0A7L3	rplT	P0A7N4	rpmF
Q2EEQ2	ykgO	P0A7N4	rpmF
P0A7Q6	rpmJ	P0A7N4	rpmF
P0ADY7	rplP	P0A7N4	rpmF
P0AG48	rplU	P0A7N4	rpmF
P0A7R1	rplI	P0A7N9	rpmG
P60422	rplB	P0A7N9	rpmG
P60438	rplC	P0A7N9	rpmG
P0A7L3	rplT	P0A7N9	rpmG
Q2EEQ2	ykgO	P0A7N9	rpmG
P0A7Q6	rpmJ	P0A7N9	rpmG
P0ADY7	rplP	P0A7N9	rpmG
P0AG48	rplU	P0A7N9	rpmG
P0A7N4	rpmF	P0A7N9	rpmG
P62399	rplE	P0A7Z4	rpoA
P0A7R1	rplI	P0A7L8	rpmA
P60422	rplB	P0A7L8	rpmA
P60438	rplC	P0A7L8	rpmA
P0A7L3	rplT	P0A7L8	rpmA
Q2EEQ2	ykgO	P0A7L8	rpmA
P0A7Q6	rpmJ	P0A7L8	rpmA
P0ADY7	rplP	P0A7L8	rpmA
P0AG48	rplU	P0A7L8	rpmA
P0A7N4	rpmF	P0A7L8	rpmA
P0A7N9	rpmG	P0A7L8	rpmA
P0AG55	rplF	P0A7R5	rpsJ
P0A7R1	rplI	P0A7R5	rpsJ
P60422	rplB	P0A7R5	rpsJ
P60438	rplC	P0A7R5	rpsJ
P62399	rplE	P0A7R5	rpsJ
P0A7L3	rplT	P0A7R5	rpsJ
Q2EEQ2	ykgO	P0A7R5	rpsJ
P0A7Q6	rpmJ	P0A7R5	rpsJ
P0ADY7	rplP	P0A7R5	rpsJ
P0AG48	rplU	P0A7R5	rpsJ
P0A7N4	rpmF	P0A7R5	rpsJ
P0A7N9	rpmG	P0A7R5	rpsJ
P0A7L8	rpmA	P0A7R5	rpsJ
P62399	rplE	P0A800	rpoZ
P0A7Z4	rpoA	P0A800	rpoZ
P0A7R1	rplI	P0A7Y0	rnc
P60422	rplB	P0A7Y0	rnc
P60438	rplC	P0A7Y0	rnc
P0A7L3	rplT	P0A7Y0	rnc
Q2EEQ2	ykgO	P0A7Y0	rnc
P0A7Q6	rpmJ	P0A7Y0	rnc
P0ADY7	rplP	P0A7Y0	rnc
P0AG48	rplU	P0A7Y0	rnc
P0A7N4	rpmF	P0A7Y0	rnc
P0A7N9	rpmG	P0A7Y0	rnc
P0A7L8	rpmA	P0A7Y0	rnc
P0A7R5	rpsJ	P0A7Y0	rnc
P0A7Z4	rpoA	P0A8T7	rpoC
P0A800	rpoZ	P0A8T7	rpoC
P0AG55	rplF	P0C018	rplR
P60422	rplB	P0C018	rplR
P60438	rplC	P0C018	rplR
P62399	rplE	P0C018	rplR
P0ADY7	rplP	P0C018	rplR
P0A7R5	rpsJ	P0C018	rplR
P0A7R1	rplI	P0A7K2	rplL
P60422	rplB	P0A7K2	rplL
P60438	rplC	P0A7K2	rplL
P0A7L3	rplT	P0A7K2	rplL
Q2EEQ2	ykgO	P0A7K2	rplL
P0A7Q6	rpmJ	P0A7K2	rplL
P0ADY7	rplP	P0A7K2	rplL
P0AG48	rplU	P0A7K2	rplL
P0A7N4	rpmF	P0A7K2	rplL
P0A7N9	rpmG	P0A7K2	rplL
P0A7L8	rpmA	P0A7K2	rplL
P0A7R5	rpsJ	P0A7K2	rplL
P0A7Y0	rnc	P0A7K2	rplL
P0AG55	rplF	P60624	rplX
P0A7R1	rplI	P60624	rplX
P60422	rplB	P60624	rplX
P60438	rplC	P60624	rplX
P62399	rplE	P60624	rplX
P0A7L3	rplT	P60624	rplX
Q2EEQ2	ykgO	P60624	rplX
P0A7Q6	rpmJ	P60624	rplX
P0ADY7	rplP	P60624	rplX
P0AG48	rplU	P60624	rplX
P0A7N4	rpmF	P60624	rplX
P0A7N9	rpmG	P60624	rplX
P0A7L8	rpmA	P60624	rplX
P0A7R5	rpsJ	P60624	rplX
P0A7Y0	rnc	P60624	rplX
P0C018	rplR	P60624	rplX
P0A7K2	rplL	P60624	rplX
P0AG55	rplF	P09155	rnd
P60422	rplB	P09155	rnd
P60438	rplC	P09155	rnd
P62399	rplE	P09155	rnd
P0C018	rplR	P09155	rnd
P60624	rplX	P09155	rnd
P0AG55	rplF	P0A7L0	rplA
P0A7R1	rplI	P0A7L0	rplA
P60422	rplB	P0A7L0	rplA
P60438	rplC	P0A7L0	rplA
P62399	rplE	P0A7L0	rplA
P0A7L3	rplT	P0A7L0	rplA
Q2EEQ2	ykgO	P0A7L0	rplA
P0A7Q6	rpmJ	P0A7L0	rplA
P0ADY7	rplP	P0A7L0	rplA
P0AG48	rplU	P0A7L0	rplA
P0A7N4	rpmF	P0A7L0	rplA
P0A7N9	rpmG	P0A7L0	rplA
P0A7L8	rpmA	P0A7L0	rplA
P0A7R5	rpsJ	P0A7L0	rplA
P0C018	rplR	P0A7L0	rplA
P0A7K2	rplL	P0A7L0	rplA
P60624	rplX	P0A7L0	rplA
P0AG55	rplF	P0A7J3	rplJ
P60422	rplB	P0A7J3	rplJ
P60438	rplC	P0A7J3	rplJ
P62399	rplE	P0A7J3	rplJ
P0ADY7	rplP	P0A7J3	rplJ
P0A7R5	rpsJ	P0A7J3	rplJ
P0C018	rplR	P0A7J3	rplJ
P60624	rplX	P0A7J3	rplJ
P09155	rnd	P0A7J3	rplJ
P0A7L0	rplA	P0A7J3	rplJ
P0AG55	rplF	P0AA10	rplM
P0A7R1	rplI	P0AA10	rplM
P60422	rplB	P0AA10	rplM
P60438	rplC	P0AA10	rplM
P62399	rplE	P0AA10	rplM
P0A7L3	rplT	P0AA10	rplM
Q2EEQ2	ykgO	P0AA10	rplM
P0A7Q6	rpmJ	P0AA10	rplM
P0ADY7	rplP	P0AA10	rplM
P0AG48	rplU	P0AA10	rplM
P0A7N4	rpmF	P0AA10	rplM
P0A7N9	rpmG	P0AA10	rplM
P0A7L8	rpmA	P0AA10	rplM
P0A7R5	rpsJ	P0AA10	rplM
P0A7Y0	rnc	P0AA10	rplM
P0C018	rplR	P0AA10	rplM
P0A7K2	rplL	P0AA10	rplM
P60624	rplX	P0AA10	rplM
P09155	rnd	P0AA10	rplM
P0A7L0	rplA	P0AA10	rplM
P0A7J3	rplJ	P0AA10	rplM
P0AG55	rplF	P0ADY3	rplN
P60422	rplB	P0ADY3	rplN
P60438	rplC	P0ADY3	rplN
P62399	rplE	P0ADY3	rplN
P0ADY7	rplP	P0ADY3	rplN
P0A7R5	rpsJ	P0ADY3	rplN
P0C018	rplR	P0ADY3	rplN
P60624	rplX	P0ADY3	rplN
P09155	rnd	P0ADY3	rplN
P0A7L0	rplA	P0ADY3	rplN
P0A7J3	rplJ	P0ADY3	rplN
P0AA10	rplM	P0ADY3	rplN
P0A7R1	rplI	P0AG44	rplQ
P60422	rplB	P0AG44	rplQ
P60438	rplC	P0AG44	rplQ
P0A7L3	rplT	P0AG44	rplQ
Q2EEQ2	ykgO	P0AG44	rplQ
P0A7Q6	rpmJ	P0AG44	rplQ
P0ADY7	rplP	P0AG44	rplQ
P0AG48	rplU	P0AG44	rplQ
P0A7N4	rpmF	P0AG44	rplQ
P0A7N9	rpmG	P0AG44	rplQ
P0A7L8	rpmA	P0AG44	rplQ
P0A7R5	rpsJ	P0AG44	rplQ
P0A7Y0	rnc	P0AG44	rplQ
P0A7K2	rplL	P0AG44	rplQ
P60624	rplX	P0AG44	rplQ
P0A7L0	rplA	P0AG44	rplQ
P0AA10	rplM	P0AG44	rplQ
P0AG55	rplF	P02413	rplO
P0A7R1	rplI	P02413	rplO
P60422	rplB	P02413	rplO
P60438	rplC	P02413	rplO
P62399	rplE	P02413	rplO
P0A7L3	rplT	P02413	rplO
Q2EEQ2	ykgO	P02413	rplO
P0A7Q6	rpmJ	P02413	rplO
P0ADY7	rplP	P02413	rplO
P0AG48	rplU	P02413	rplO
P0A7N4	rpmF	P02413	rplO
P0A7N9	rpmG	P02413	rplO
P0A7L8	rpmA	P02413	rplO
P0A7R5	rpsJ	P02413	rplO
P0A7Y0	rnc	P02413	rplO
P0C018	rplR	P02413	rplO
P0A7K2	rplL	P02413	rplO
P60624	rplX	P02413	rplO
P09155	rnd	P02413	rplO
P0A7L0	rplA	P02413	rplO
P0A7J3	rplJ	P02413	rplO
P0AA10	rplM	P02413	rplO
P0ADY3	rplN	P02413	rplO
P0AG44	rplQ	P02413	rplO
P0AG55	rplF	P0A7M6	rpmC
P60422	rplB	P0A7M6	rpmC
P60438	rplC	P0A7M6	rpmC
P62399	rplE	P0A7M6	rpmC
P0ADY7	rplP	P0A7M6	rpmC
P0A7R5	rpsJ	P0A7M6	rpmC
P0C018	rplR	P0A7M6	rpmC
P60624	rplX	P0A7M6	rpmC
P09155	rnd	P0A7M6	rpmC
P0A7L0	rplA	P0A7M6	rpmC
P0A7J3	rplJ	P0A7M6	rpmC
P0AA10	rplM	P0A7M6	rpmC
P0ADY3	rplN	P0A7M6	rpmC
P02413	rplO	P0A7M6	rpmC
P0AG55	rplF	P0AG51	rpmD
P60422	rplB	P0AG51	rpmD
P60438	rplC	P0AG51	rpmD
P62399	rplE	P0AG51	rpmD
P0ADY7	rplP	P0AG51	rpmD
P0A7R5	rpsJ	P0AG51	rpmD
P0C018	rplR	P0AG51	rpmD
P60624	rplX	P0AG51	rpmD
P09155	rnd	P0AG51	rpmD
P0A7L0	rplA	P0AG51	rpmD
P0A7J3	rplJ	P0AG51	rpmD
P0AA10	rplM	P0AG51	rpmD
P0ADY3	rplN	P0AG51	rpmD
P02413	rplO	P0AG51	rpmD
P0A7M6	rpmC	P0AG51	rpmD
P0AG55	rplF	P60723	rplD
P0A7R1	rplI	P60723	rplD
P60422	rplB	P60723	rplD
P60438	rplC	P60723	rplD
P62399	rplE	P60723	rplD
P0A7L3	rplT	P60723	rplD
Q2EEQ2	ykgO	P60723	rplD
P0A7Q6	rpmJ	P60723	rplD
P0ADY7	rplP	P60723	rplD
P0AG48	rplU	P60723	rplD
P0A7N4	rpmF	P60723	rplD
P0A7N9	rpmG	P60723	rplD
P0A7L8	rpmA	P60723	rplD
P0A7R5	rpsJ	P60723	rplD
P0A7Y0	rnc	P60723	rplD
P0C018	rplR	P60723	rplD
P0A7K2	rplL	P60723	rplD
P60624	rplX	P60723	rplD
P09155	rnd	P60723	rplD
P0A7L0	rplA	P60723	rplD
P0A7J3	rplJ	P60723	rplD
P0AA10	rplM	P60723	rplD
P0ADY3	rplN	P60723	rplD
P0AG44	rplQ	P60723	rplD
P02413	rplO	P60723	rplD
P0A7M6	rpmC	P60723	rplD
P0AG51	rpmD	P60723	rplD
P62399	rplE	P0A8V2	rpoB
P0A7Z4	rpoA	P0A8V2	rpoB
P0A800	rpoZ	P0A8V2	rpoB
P0A8T7	rpoC	P0A8V2	rpoB
P0AG55	rplF	P0A7U3	rpsS
P36999	rlmA	P0A7U3	rpsS
P60422	rplB	P0A7U3	rpsS
P60438	rplC	P0A7U3	rpsS
P62399	rplE	P0A7U3	rpsS
P0ADY7	rplP	P0A7U3	rpsS
P0A7R5	rpsJ	P0A7U3	rpsS
P0C018	rplR	P0A7U3	rpsS
P60624	rplX	P0A7U3	rpsS
P0A7L0	rplA	P0A7U3	rpsS
P0A7J3	rplJ	P0A7U3	rpsS
P0AA10	rplM	P0A7U3	rpsS
P0ADY3	rplN	P0A7U3	rpsS
P02413	rplO	P0A7U3	rpsS
P0A7M6	rpmC	P0A7U3	rpsS
P0AG51	rpmD	P0A7U3	rpsS
P60723	rplD	P0A7U3	rpsS
P0AG55	rplF	P02359	rpsG
P0A7R1	rplI	P02359	rpsG
P36999	rlmA	P02359	rpsG
P60422	rplB	P02359	rpsG
P60438	rplC	P02359	rpsG
P62399	rplE	P02359	rpsG
P0A7L3	rplT	P02359	rpsG
Q2EEQ2	ykgO	P02359	rpsG
P0A7Q6	rpmJ	P02359	rpsG
P0ADY7	rplP	P02359	rpsG
P0AG48	rplU	P02359	rpsG
P0A7N4	rpmF	P02359	rpsG
P0A7N9	rpmG	P02359	rpsG
P0A7L8	rpmA	P02359	rpsG
P0A7R5	rpsJ	P02359	rpsG
P0A7Y0	rnc	P02359	rpsG
P0C018	rplR	P02359	rpsG
P0A7K2	rplL	P02359	rpsG
P60624	rplX	P02359	rpsG
P0A7L0	rplA	P02359	rpsG
P0A7J3	rplJ	P02359	rpsG
P0AA10	rplM	P02359	rpsG
P0ADY3	rplN	P02359	rpsG
P0AG44	rplQ	P02359	rpsG
P02413	rplO	P02359	rpsG
P0A7M6	rpmC	P02359	rpsG
P0AG51	rpmD	P02359	rpsG
P60723	rplD	P02359	rpsG
P0A7U3	rpsS	P02359	rpsG
P0AG55	rplF	P0A7W7	rpsH
P36999	rlmA	P0A7W7	rpsH
P60422	rplB	P0A7W7	rpsH
P60438	rplC	P0A7W7	rpsH
P62399	rplE	P0A7W7	rpsH
P0ADY7	rplP	P0A7W7	rpsH
P0A7R5	rpsJ	P0A7W7	rpsH
P0C018	rplR	P0A7W7	rpsH
P60624	rplX	P0A7W7	rpsH
P0A7L0	rplA	P0A7W7	rpsH
P0A7J3	rplJ	P0A7W7	rpsH
P0AA10	rplM	P0A7W7	rpsH
P0ADY3	rplN	P0A7W7	rpsH
P02413	rplO	P0A7W7	rpsH
P0A7M6	rpmC	P0A7W7	rpsH
P0AG51	rpmD	P0A7W7	rpsH
P60723	rplD	P0A7W7	rpsH
P0A7U3	rpsS	P0A7W7	rpsH
P02359	rpsG	P0A7W7	rpsH
P24255	rpoN	P39453	torS
P52108	rstA	P39453	torS
P38683	torT	P39453	torS
P39453	torS	P38684	torR
P39453	torS	P02929	tonB
P0AG55	rplF	P0AGA2	secY
P60422	rplB	P0AGA2	secY
P60438	rplC	P0AGA2	secY
P62399	rplE	P0AGA2	secY
P0ADY7	rplP	P0AGA2	secY
P0A7R5	rpsJ	P0AGA2	secY
P0C018	rplR	P0AGA2	secY
P60624	rplX	P0AGA2	secY
P0A7L0	rplA	P0AGA2	secY
P0A7J3	rplJ	P0AGA2	secY
P0AA10	rplM	P0AGA2	secY
P0ADY3	rplN	P0AGA2	secY
P02413	rplO	P0AGA2	secY
P0A7M6	rpmC	P0AGA2	secY
P0AG51	rpmD	P0AGA2	secY
P60723	rplD	P0AGA2	secY
P0A7U3	rpsS	P0AGA2	secY
P02359	rpsG	P0AGA2	secY
P0A7W7	rpsH	P0AGA2	secY
P39453	torS	P0AEV1	rssB
P52108	rstA	P18392	rstB
P0A7U3	rpsS	P25397	tehB
P02359	rpsG	P25397	tehB
P0A7W7	rpsH	P25397	tehB
P0AG55	rplF	P21507	srmB
P0C0R7	rlmE	P21507	srmB
P60422	rplB	P21507	srmB
P60438	rplC	P21507	srmB
P62399	rplE	P21507	srmB
P0A7Z4	rpoA	P21507	srmB
P0A8T7	rpoC	P21507	srmB
P60624	rplX	P21507	srmB
P09155	rnd	P21507	srmB
P0A7L0	rplA	P21507	srmB
P0A7J3	rplJ	P21507	srmB
P0AA10	rplM	P21507	srmB
P0ADY3	rplN	P21507	srmB
P02413	rplO	P21507	srmB
P0A7M6	rpmC	P21507	srmB
P0AG51	rpmD	P21507	srmB
P60723	rplD	P21507	srmB
P0A8V2	rpoB	P21507	srmB
P0A7W7	rpsH	P21507	srmB
Q46871	yqjH	P64588	yqjI
P0A8V2	rpoB	P64610	yrbL
P39453	torS	P64610	yrbL
P18392	rstB	P64610	yrbL
P21507	srmB	P64610	yrbL
P0AG55	rplF	P0ADZ0	rplW
P60422	rplB	P0ADZ0	rplW
P60438	rplC	P0ADZ0	rplW
P62399	rplE	P0ADZ0	rplW
P0ADY7	rplP	P0ADZ0	rplW
P0A7R5	rpsJ	P0ADZ0	rplW
P0C018	rplR	P0ADZ0	rplW
P60624	rplX	P0ADZ0	rplW
P09155	rnd	P0ADZ0	rplW
P0A7L0	rplA	P0ADZ0	rplW
P0A7J3	rplJ	P0ADZ0	rplW
P0AA10	rplM	P0ADZ0	rplW
P0ADY3	rplN	P0ADZ0	rplW
P02413	rplO	P0ADZ0	rplW
P0A7M6	rpmC	P0ADZ0	rplW
P0AG51	rpmD	P0ADZ0	rplW
P60723	rplD	P0ADZ0	rplW
P0A7U3	rpsS	P0ADZ0	rplW
P02359	rpsG	P0ADZ0	rplW
P0A7W7	rpsH	P0ADZ0	rplW
P0AGA2	secY	P0ADZ0	rplW
P21507	srmB	P0ADZ0	rplW
P24255	rpoN	P0AGB6	rpoE
P60624	rplX	P21499	rnr
P0A7J3	rplJ	P21499	rnr
P24255	rpoN	P00579	rpoD
P39453	torS	P00579	rpoD
P24255	rpoN	P13445	rpoS
P39453	torS	P13445	rpoS
P24255	rpoN	P0AGB3	rpoH
P39453	torS	P0AGB3	rpoH
P60422	rplB	P30014	rnt
P0A7J3	rplJ	P30014	rnt
P0C0R7	rlmE	P0AG67	rpsA
P09155	rnd	P0AG67	rpsA
P60723	rplD	P0AG67	rpsA
P02359	rpsG	P0AG67	rpsA
P0A7W7	rpsH	P0AG67	rpsA
P42596	rlmG	P36929	rsmB
P0AGB6	rpoE	P36929	rsmB
P39453	torS	P0DMC9	rcsA
P39453	torS	P0DMC7	rcsB
P36929	rsmB	P0DMC7	rcsB
P0DMC9	rcsA	P0DMC7	rcsB
P64610	yrbL	P25740	rfaG
P0A7R1	rplI	P0A7I0	prfA
P60422	rplB	P0A7I0	prfA
P60438	rplC	P0A7I0	prfA
P0A7L3	rplT	P0A7I0	prfA
Q2EEQ2	ykgO	P0A7I0	prfA
P0A7Q6	rpmJ	P0A7I0	prfA
P0ADY7	rplP	P0A7I0	prfA
P0AG48	rplU	P0A7I0	prfA
P0A7N4	rpmF	P0A7I0	prfA
P0A7N9	rpmG	P0A7I0	prfA
P0A7L8	rpmA	P0A7I0	prfA
P0A7R5	rpsJ	P0A7I0	prfA
P0A7Y0	rnc	P0A7I0	prfA
P60624	rplX	P0A7I0	prfA
P0A7L0	rplA	P0A7I0	prfA
P0AA10	rplM	P0A7I0	prfA
P0AG44	rplQ	P0A7I0	prfA
P02413	rplO	P0A7I0	prfA
P60723	rplD	P0A7I0	prfA
P02359	rpsG	P0A7I0	prfA
P39453	torS	P52076	qseB
P77212	rclA	P0AFG3	sucA
P39453	torS	P06959	aceF
P18392	rstB	P06959	aceF
P77212	rclA	P06959	aceF
P0AFG3	sucA	P06959	aceF
P0A7Z4	rpoA	P60240	rapA
P0A800	rpoZ	P60240	rapA
P0A8T7	rpoC	P60240	rapA
P0A8V2	rpoB	P60240	rapA
P21507	srmB	P60240	rapA
P0A7Z4	rpoA	P33919	radD
P0A800	rpoZ	P33919	radD
P0A8T7	rpoC	P33919	radD
P0A8V2	rpoB	P33919	radD
P60240	rapA	P33919	radD
P24255	rpoN	P39838	rcsD
P38683	torT	P39838	rcsD
P39453	torS	P39838	rcsD
P64610	yrbL	P39838	rcsD
P00579	rpoD	P39838	rcsD
P13445	rpoS	P39838	rcsD
P0AGB3	rpoH	P39838	rcsD
P0DMC9	rcsA	P39838	rcsD
P0DMC7	rcsB	P39838	rcsD
P06959	aceF	P39838	rcsD
P24255	rpoN	P0DMC5	rcsC
P39453	torS	P0DMC5	rcsC
P64610	yrbL	P0DMC5	rcsC
P00579	rpoD	P0DMC5	rcsC
P13445	rpoS	P0DMC5	rcsC
P0AGB3	rpoH	P0DMC5	rcsC
P0DMC7	rcsB	P0DMC5	rcsC
P06959	aceF	P0DMC5	rcsC
P39838	rcsD	P0DMC5	rcsC
P39453	torS	P23842	pdeA
P39838	rcsD	P23842	pdeA
P0DMC5	rcsC	P23842	pdeA
P52045	scpB	P07003	poxB
P0A9E2	soxS	P07003	poxB
P14294	topB	P15043	recQ
P06612	topA	P15043	recQ
P0AG55	rplF	P25888	rhlE
P0C0R7	rlmE	P25888	rhlE
P60422	rplB	P25888	rhlE
P60438	rplC	P25888	rhlE
P62399	rplE	P25888	rhlE
P0A7Z4	rpoA	P25888	rhlE
P0A8T7	rpoC	P25888	rhlE
P60624	rplX	P25888	rhlE
P09155	rnd	P25888	rhlE
P0A7L0	rplA	P25888	rhlE
P0A7J3	rplJ	P25888	rhlE
P0AA10	rplM	P25888	rhlE
P0ADY3	rplN	P25888	rhlE
P02413	rplO	P25888	rhlE
P0A7M6	rpmC	P25888	rhlE
P0AG51	rpmD	P25888	rhlE
P60723	rplD	P25888	rhlE
P0A8V2	rpoB	P25888	rhlE
P0A7W7	rpsH	P25888	rhlE
P64610	yrbL	P25888	rhlE
P0ADZ0	rplW	P25888	rhlE
P60240	rapA	P25888	rhlE
P0AG55	rplF	P0A8J8	rhlB
P0C0R7	rlmE	P0A8J8	rhlB
P60422	rplB	P0A8J8	rhlB
P60438	rplC	P0A8J8	rhlB
P62399	rplE	P0A8J8	rhlB
P0A7Z4	rpoA	P0A8J8	rhlB
P0A8T7	rpoC	P0A8J8	rhlB
P60624	rplX	P0A8J8	rhlB
P09155	rnd	P0A8J8	rhlB
P0A7L0	rplA	P0A8J8	rhlB
P0A7J3	rplJ	P0A8J8	rhlB
P0AA10	rplM	P0A8J8	rhlB
P0ADY3	rplN	P0A8J8	rhlB
P02413	rplO	P0A8J8	rhlB
P0A7M6	rpmC	P0A8J8	rhlB
P0AG51	rpmD	P0A8J8	rhlB
P60723	rplD	P0A8J8	rhlB
P0A8V2	rpoB	P0A8J8	rhlB
P0A7W7	rpsH	P0A8J8	rhlB
P64610	yrbL	P0A8J8	rhlB
P0ADZ0	rplW	P0A8J8	rhlB
P60240	rapA	P0A8J8	rhlB
P52108	rstA	P40719	qseC
P39453	torS	P40719	qseC
P64610	yrbL	P40719	qseC
P52076	qseB	P40719	qseC
P06959	aceF	P40719	qseC
P0DMC5	rcsC	P40719	qseC
P14294	topB	P0A7G6	recA
P06612	topA	P0A7G6	recA
P64610	yrbL	P0A7G6	recA
P33596	recX	P0A7G6	recA
P15043	recQ	P0A7G6	recA
P0A7R1	rplI	P0A7K6	rplS
P60422	rplB	P0A7K6	rplS
P60438	rplC	P0A7K6	rplS
P0A7L3	rplT	P0A7K6	rplS
Q2EEQ2	ykgO	P0A7K6	rplS
P0A7Q6	rpmJ	P0A7K6	rplS
P0ADY7	rplP	P0A7K6	rplS
P0AG48	rplU	P0A7K6	rplS
P0A7N4	rpmF	P0A7K6	rplS
P0A7N9	rpmG	P0A7K6	rplS
P0A7L8	rpmA	P0A7K6	rplS
P0A7R5	rpsJ	P0A7K6	rplS
P0A7Y0	rnc	P0A7K6	rplS
P0A7K2	rplL	P0A7K6	rplS
P60624	rplX	P0A7K6	rplS
P0A7L0	rplA	P0A7K6	rplS
P0AA10	rplM	P0A7K6	rplS
P0AG44	rplQ	P0A7K6	rplS
P02413	rplO	P0A7K6	rplS
P60723	rplD	P0A7K6	rplS
P02359	rpsG	P0A7K6	rplS
P0A7I0	prfA	P0A7K6	rplS
P0AG55	rplF	P61175	rplV
P0A7R1	rplI	P61175	rplV
P60422	rplB	P61175	rplV
P60438	rplC	P61175	rplV
P62399	rplE	P61175	rplV
P0A7L3	rplT	P61175	rplV
Q2EEQ2	ykgO	P61175	rplV
P0A7Q6	rpmJ	P61175	rplV
P0ADY7	rplP	P61175	rplV
P0AG48	rplU	P61175	rplV
P0A7N4	rpmF	P61175	rplV
P0A7N9	rpmG	P61175	rplV
P0A7L8	rpmA	P61175	rplV
P0A7R5	rpsJ	P61175	rplV
P0A7Y0	rnc	P61175	rplV
P0C018	rplR	P61175	rplV
P0A7K2	rplL	P61175	rplV
P60624	rplX	P61175	rplV
P09155	rnd	P61175	rplV
P0A7L0	rplA	P61175	rplV
P0A7J3	rplJ	P61175	rplV
P0AA10	rplM	P61175	rplV
P0ADY3	rplN	P61175	rplV
P0AG44	rplQ	P61175	rplV
P02413	rplO	P61175	rplV
P0A7M6	rpmC	P61175	rplV
P0AG51	rpmD	P61175	rplV
P60723	rplD	P61175	rplV
P0A7U3	rpsS	P61175	rplV
P02359	rpsG	P61175	rplV
P0A7W7	rpsH	P61175	rplV
P0AGA2	secY	P61175	rplV
P21507	srmB	P61175	rplV
P0ADZ0	rplW	P61175	rplV
P0A7I0	prfA	P61175	rplV
P25888	rhlE	P61175	rplV
P0A8J8	rhlB	P61175	rplV
P0A7K6	rplS	P61175	rplV
P64610	yrbL	P77736	yahD
P0A7G6	recA	P77736	yahD
P64610	yrbL	P0A8F4	udk
P60240	rapA	P0A8F4	udk
P39453	torS	P0AGA6	uhpA
P09835	uhpB	P0AGA6	uhpA
P0DMC7	rcsB	P76373	ugd
P0A7U3	rpsS	P0A887	ubiE
P02359	rpsG	P0A887	ubiE
P0A7W7	rpsH	P0A887	ubiE
Q46907	ygcQ	Q46908	ygcR
P39453	torS	Q46802	ygeV
P39838	rcsD	Q46802	ygeV
P0DMC5	rcsC	Q46802	ygeV
P77736	yahD	P56258	wecF
P0A8F4	udk	P0AAB2	wzb
P76373	ugd	P76387	wzc
P0A7Z4	rpoA	P38506	ygdG
P0A8T7	rpoC	P38506	ygdG
P0A8V2	rpoB	P38506	ygdG
P60240	rapA	P38506	ygdG
P33919	radD	P38506	ygdG
P15043	recQ	P38506	ygdG
P0A7G6	recA	P38506	ygdG
P39453	torS	P77269	yphF
P39838	rcsD	P77269	yphF
P0A7Z4	rpoA	P76585	yphG
P0A8T7	rpoC	P76585	yphG
P30176	ybiA	P76585	yphG
P39453	torS	P76585	yphG
P0DMC9	rcsA	P76585	yphG
P0DMC7	rcsB	P76585	yphG
P33919	radD	P76585	yphG
P77736	yahD	P76585	yphG
P0AGA6	uhpA	P76585	yphG
P56258	wecF	P76585	yphG
P0ACI0	rob	P0ABB8	mgtA
P0AA53	qmcA	P0ABB8	mgtA
P0A7Z4	rpoA	P0ABB4	atpD
P0A8T7	rpoC	P0ABB4	atpD
P0A8V2	rpoB	P0ABB4	atpD
P0AGK1	ubiA	P0ABB4	atpD
P0ABB0	atpA	P0ABB4	atpD
P24255	rpoN	P0AEC5	barA
P52108	rstA	P0AEC5	barA
P39453	torS	P0AEC5	barA
P38684	torR	P0AEC5	barA
P0AEV1	rssB	P0AEC5	barA
P18392	rstB	P0AEC5	barA
P64610	yrbL	P0AEC5	barA
P00579	rpoD	P0AEC5	barA
P13445	rpoS	P0AEC5	barA
P0AGB3	rpoH	P0AEC5	barA
P0DMC9	rcsA	P0AEC5	barA
P0DMC7	rcsB	P0AEC5	barA
P52076	qseB	P0AEC5	barA
P06959	aceF	P0AEC5	barA
P39838	rcsD	P0AEC5	barA
P0DMC5	rcsC	P0AEC5	barA
P23842	pdeA	P0AEC5	barA
P40719	qseC	P0AEC5	barA
P0AGA6	uhpA	P0AEC5	barA
Q46802	ygeV	P0AEC5	barA
P39453	torS	P76236	cdgI
P0AEC5	barA	P76236	cdgI
P0A881	trpR	P00887	aroH
P52045	scpB	P60584	caiA
P07604	tyrR	P0A6E1	aroL
P39453	torS	Q06065	atoC
P39838	rcsD	Q06065	atoC
P0DMC5	rcsC	Q06065	atoC
P76585	yphG	Q06065	atoC
P0AEC5	barA	Q06065	atoC
P64610	yrbL	P21179	katE
P13445	rpoS	P21179	katE
P07003	poxB	P21179	katE
P77736	yahD	P21179	katE
P52037	ygfF	P21179	katE
P0AG84	yghA	P21179	katE
P60584	caiA	P21179	katE
P0ABB0	atpA	P0AB98	atpB
P0ABB4	atpD	P0AB98	atpB
P0A7Z4	rpoA	P0ABA6	atpG
P0A8V2	rpoB	P0ABA6	atpG
P0ABB0	atpA	P0ABA6	atpG
P0ABB4	atpD	P0ABA6	atpG
P0AB98	atpB	P0ABA6	atpG
P0ABB0	atpA	P0ABA4	atpH
P0ABB4	atpD	P0ABA4	atpH
P0AB98	atpB	P0ABA4	atpH
P0ABA6	atpG	P0ABA4	atpH
P0ABB0	atpA	P0A6E6	atpC
P0ABB4	atpD	P0A6E6	atpC
P0AB98	atpB	P0A6E6	atpC
P0ABA6	atpG	P0A6E6	atpC
P0ABA4	atpH	P0A6E6	atpC
P0ABB0	atpA	P68699	atpE
P0ABB4	atpD	P68699	atpE
P0AB98	atpB	P68699	atpE
P0ABA6	atpG	P68699	atpE
P0ABA4	atpH	P68699	atpE
P0A6E6	atpC	P68699	atpE
P76585	yphG	P36659	cbpA
P0DMC7	rcsB	P76127	bdm
P0AEV1	rssB	P0A6G7	clpP
P39453	torS	P39404	bglJ
P76585	yphG	P39404	bglJ
P0AEC5	barA	P39404	bglJ
P64610	yrbL	P0A6F5	groL
P36659	cbpA	P0A6F5	groL
P39453	torS	P0AE67	cheY
P0AEC5	barA	P0AE67	cheY
P0A6G7	clpP	P0AE67	cheY
P39453	torS	P07364	cheR
P39838	rcsD	P07364	cheR
P0DMC5	rcsC	P07364	cheR
P0AEC5	barA	P07364	cheR
P0AE67	cheY	P07364	cheR
P39453	torS	P0A964	cheW
P39838	rcsD	P0A964	cheW
P0DMC5	rcsC	P0A964	cheW
Q46802	ygeV	P0A964	cheW
P0AEC5	barA	P0A964	cheW
P0AE67	cheY	P0A964	cheW
P07364	cheR	P0A964	cheW
P39453	torS	P07330	cheB
P39838	rcsD	P07330	cheB
P0DMC5	rcsC	P07330	cheB
P0AEC5	barA	P07330	cheB
P0AE67	cheY	P07330	cheB
P07364	cheR	P07330	cheB
P0A964	cheW	P07330	cheB
P39453	torS	P07363	cheA
P18392	rstB	P07363	cheA
P0DMC9	rcsA	P07363	cheA
P0DMC7	rcsB	P07363	cheA
P39838	rcsD	P07363	cheA
P0DMC5	rcsC	P07363	cheA
P23842	pdeA	P07363	cheA
P40719	qseC	P07363	cheA
P0AGA6	uhpA	P07363	cheA
Q46802	ygeV	P07363	cheA
P0AEC5	barA	P07363	cheA
Q06065	atoC	P07363	cheA
P39404	bglJ	P07363	cheA
P0AE67	cheY	P07363	cheA
P07364	cheR	P07363	cheA
P0A964	cheW	P07363	cheA
P07330	cheB	P07363	cheA
P39453	torS	P77302	dgcM
P39838	rcsD	P77302	dgcM
P0AEC5	barA	P77302	dgcM
P07363	cheA	P77302	dgcM
P56258	wecF	P39099	degQ
P52108	rstA	P38097	dgcE
P39453	torS	P38097	dgcE
P38684	torR	P38097	dgcE
P0AEV1	rssB	P38097	dgcE
P18392	rstB	P38097	dgcE
P00579	rpoD	P38097	dgcE
P13445	rpoS	P38097	dgcE
P0AGB3	rpoH	P38097	dgcE
P52076	qseB	P38097	dgcE
P39838	rcsD	P38097	dgcE
P0DMC5	rcsC	P38097	dgcE
P23842	pdeA	P38097	dgcE
P40719	qseC	P38097	dgcE
Q46802	ygeV	P38097	dgcE
P0AEC5	barA	P38097	dgcE
Q06065	atoC	P38097	dgcE
P0AE67	cheY	P38097	dgcE
P07364	cheR	P38097	dgcE
P0A964	cheW	P38097	dgcE
P07330	cheB	P38097	dgcE
P07363	cheA	P38097	dgcE
P77302	dgcM	P38097	dgcE
P39453	torS	P76147	dgcF
P0AEC5	barA	P76147	dgcF
Q46907	ygcQ	P68646	fixX
Q46908	ygcR	P68646	fixX
P77221	yahG	P77359	djlC
P02929	tonB	P29680	hemE
P38097	dgcE	P29680	hemE
P39453	torS	P37195	dctR
P76585	yphG	P37195	dctR
P0AEC5	barA	P37195	dctR
P07363	cheA	P37195	dctR
P0A7G6	recA	P28248	dcd
P39453	torS	P75801	dgcI
P0AEC5	barA	P75801	dgcI
P0AG55	rplF	P0A9P6	deaD
P0C0R7	rlmE	P0A9P6	deaD
P60422	rplB	P0A9P6	deaD
P60438	rplC	P0A9P6	deaD
P62399	rplE	P0A9P6	deaD
P0A7Z4	rpoA	P0A9P6	deaD
P0A8T7	rpoC	P0A9P6	deaD
P60624	rplX	P0A9P6	deaD
P09155	rnd	P0A9P6	deaD
P0A7L0	rplA	P0A9P6	deaD
P0A7J3	rplJ	P0A9P6	deaD
P0AA10	rplM	P0A9P6	deaD
P0ADY3	rplN	P0A9P6	deaD
P02413	rplO	P0A9P6	deaD
P0A7M6	rpmC	P0A9P6	deaD
P0AG51	rpmD	P0A9P6	deaD
P60723	rplD	P0A9P6	deaD
P0A8V2	rpoB	P0A9P6	deaD
P0A7W7	rpsH	P0A9P6	deaD
P64610	yrbL	P0A9P6	deaD
P0ADZ0	rplW	P0A9P6	deaD
P60240	rapA	P0A9P6	deaD
P61175	rplV	P0A9P6	deaD
P39453	torS	P0AEC8	dcuS
P0AEC5	barA	P0AEC8	dcuS
Q06065	atoC	P0AEC8	dcuS
P13445	rpoS	Q47150	dinJ
P39453	torS	P76237	dgcJ
P0AEC5	barA	P76237	dgcJ
P39453	torS	P0AAP1	dgcC
P39838	rcsD	P0AAP1	dgcC
P0AEC5	barA	P0AAP1	dgcC
P07363	cheA	P0AAP1	dgcC
P38097	dgcE	P0AAP1	dgcC
P39453	torS	P75908	dgcT
P39838	rcsD	P75908	dgcT
P0AEC5	barA	P75908	dgcT
P07363	cheA	P75908	dgcT
P38097	dgcE	P75908	dgcT
P39453	torS	P0AEE5	mglB
P39838	rcsD	P0AEE5	mglB
P39453	torS	P31129	dgcZ
P39838	rcsD	P31129	dgcZ
P0AEC5	barA	P31129	dgcZ
P07363	cheA	P31129	dgcZ
P38097	dgcE	P31129	dgcZ
P39453	torS	P0AA89	dosC
P39838	rcsD	P0AA89	dosC
P0AEC5	barA	P0AA89	dosC
P07363	cheA	P0AA89	dosC
P38097	dgcE	P0AA89	dosC
P64610	yrbL	P45523	fkpA
P76373	ugd	P0AFT5	btsR
P77690	arnB	P77757	arnC
P64610	yrbL	P23325	arpA
P0A7G6	recA	P23325	arpA
P56258	wecF	P23325	arpA
P76585	yphG	P23325	arpA
P39453	torS	P02924	araF
P39838	rcsD	P02924	araF
P27253	scpA	P27254	argK
P07003	poxB	P31551	caiD
P60584	caiA	P31551	caiD
P60422	rplB	P45956	ygbF
P0A7J3	rplJ	P45956	ygbF
P24255	rpoN	Q06067	atoS
P39453	torS	Q06067	atoS
P39838	rcsD	Q06067	atoS
P0DMC5	rcsC	Q06067	atoS
P0AEC5	barA	Q06067	atoS
Q06065	atoC	Q06067	atoS
P07363	cheA	Q06067	atoS
P39453	torS	P0A9Q1	arcA
P0AEC5	barA	P0A9Q1	arcA
P38097	dgcE	P0A9Q1	arcA
P06129	btuB	P0A9H5	btuR
P21179	katE	P22333	add
P69503	apt	P22333	add
P21507	srmB	P05637	apaH
P64610	yrbL	P05637	apaH
P25740	rfaG	P05637	apaH
P25888	rhlE	P05637	apaH
P0A8J8	rhlB	P05637	apaH
P77736	yahD	P05637	apaH
P76585	yphG	P05637	apaH
P0A9P6	deaD	P05637	apaH
P45523	fkpA	P05637	apaH
P23325	arpA	P05637	apaH
P13445	rpoS	P0ABE2	bolA
P0A7U3	rpsS	P12999	bioC
P02359	rpsG	P12999	bioC
P0A7W7	rpsH	P12999	bioC
P21179	katE	P04825	pepN
P22333	add	P04825	pepN
P00811	ampC	P13016	ampD
P05637	apaH	P13001	bioH
P39453	torS	P39265	alsB
P39838	rcsD	P39265	alsB
P06709	birA	P12998	bioF
P24255	rpoN	P0AEC3	arcB
P52108	rstA	P0AEC3	arcB
P38683	torT	P0AEC3	arcB
P39453	torS	P0AEC3	arcB
P38684	torR	P0AEC3	arcB
P02929	tonB	P0AEC3	arcB
P0AEV1	rssB	P0AEC3	arcB
P18392	rstB	P0AEC3	arcB
P00579	rpoD	P0AEC3	arcB
P13445	rpoS	P0AEC3	arcB
P0AGB3	rpoH	P0AEC3	arcB
P0DMC9	rcsA	P0AEC3	arcB
P0DMC7	rcsB	P0AEC3	arcB
P52076	qseB	P0AEC3	arcB
P39838	rcsD	P0AEC3	arcB
P0DMC5	rcsC	P0AEC3	arcB
P23842	pdeA	P0AEC3	arcB
P40719	qseC	P0AEC3	arcB
P0AGA6	uhpA	P0AEC3	arcB
Q46802	ygeV	P0AEC3	arcB
P77269	yphF	P0AEC3	arcB
P76585	yphG	P0AEC3	arcB
P0AEC5	barA	P0AEC3	arcB
P76236	cdgI	P0AEC3	arcB
Q06065	atoC	P0AEC3	arcB
P39404	bglJ	P0AEC3	arcB
P0AE67	cheY	P0AEC3	arcB
P07364	cheR	P0AEC3	arcB
P0A964	cheW	P0AEC3	arcB
P07330	cheB	P0AEC3	arcB
P07363	cheA	P0AEC3	arcB
P77302	dgcM	P0AEC3	arcB
P38097	dgcE	P0AEC3	arcB
P76147	dgcF	P0AEC3	arcB
P29680	hemE	P0AEC3	arcB
P37195	dctR	P0AEC3	arcB
P75801	dgcI	P0AEC3	arcB
P0AEC8	dcuS	P0AEC3	arcB
P76237	dgcJ	P0AEC3	arcB
P0AAP1	dgcC	P0AEC3	arcB
P75908	dgcT	P0AEC3	arcB
P0AEE5	mglB	P0AEC3	arcB
P31129	dgcZ	P0AEC3	arcB
P0AA89	dosC	P0AEC3	arcB
P02924	araF	P0AEC3	arcB
Q06067	atoS	P0AEC3	arcB
P0A9Q1	arcA	P0AEC3	arcB
P39265	alsB	P0AEC3	arcB
P0A7R1	rplI	P40711	arfB
P60422	rplB	P40711	arfB
P60438	rplC	P40711	arfB
P0A7L3	rplT	P40711	arfB
Q2EEQ2	ykgO	P40711	arfB
P0A7Q6	rpmJ	P40711	arfB
P0ADY7	rplP	P40711	arfB
P0AG48	rplU	P40711	arfB
P0A7N4	rpmF	P40711	arfB
P0A7N9	rpmG	P40711	arfB
P0A7L8	rpmA	P40711	arfB
P0A7R5	rpsJ	P40711	arfB
P0A7Y0	rnc	P40711	arfB
P60624	rplX	P40711	arfB
P0A7L0	rplA	P40711	arfB
P0AA10	rplM	P40711	arfB
P0AG44	rplQ	P40711	arfB
P02413	rplO	P40711	arfB
P60723	rplD	P40711	arfB
P02359	rpsG	P40711	arfB
P0A7I0	prfA	P40711	arfB
P0A7K6	rplS	P40711	arfB
P61175	rplV	P40711	arfB
P06709	birA	P24182	accC
P45469	yraR	P0A6A8	acpP
P39315	qorB	P0A6A8	acpP
P60584	caiA	P0A6A8	acpP
P39333	bdcA	P0A6A8	acpP
P31552	caiC	P0A6A8	acpP
P31119	aas	P0A6A8	acpP
P64610	yrbL	P45565	ais
P52045	scpB	P33224	aidB
P21179	katE	P33224	aidB
P31551	caiD	P33224	aidB
P0AA53	qmcA	P0AAI3	ftsH
P52108	rstA	P0AEJ4	envZ
P64610	yrbL	P0AEJ4	envZ
P52076	qseB	P0AEJ4	envZ
P06959	aceF	P0AEJ4	envZ
P0AEC5	barA	P0AEJ4	envZ
P07363	cheA	P0AEJ4	envZ
P38097	dgcE	P0AEJ4	envZ
P0AEC3	arcB	P0AEJ4	envZ
P60422	rplB	P0AEK0	exoX
P0A7J3	rplJ	P0AEK0	exoX
P04395	alkA	P50465	nei
P24224	acpS	P0ADI4	entB
P37623	acpT	P0ADI4	entB
P21515	acpH	P0ADI4	entB
P76585	yphG	P08622	dnaJ
P0A6F5	groL	P08622	dnaJ
P22333	add	P08622	dnaJ
P52108	rstA	P76129	dosP
P39453	torS	P76129	dosP
P38684	torR	P76129	dosP
P0AEV1	rssB	P76129	dosP
P18392	rstB	P76129	dosP
P52076	qseB	P76129	dosP
P39838	rcsD	P76129	dosP
P0DMC5	rcsC	P76129	dosP
P23842	pdeA	P76129	dosP
P40719	qseC	P76129	dosP
Q46802	ygeV	P76129	dosP
P0AEC5	barA	P76129	dosP
Q06065	atoC	P76129	dosP
P0AE67	cheY	P76129	dosP
P07364	cheR	P76129	dosP
P0A964	cheW	P76129	dosP
P07330	cheB	P76129	dosP
P07363	cheA	P76129	dosP
P77302	dgcM	P76129	dosP
P38097	dgcE	P76129	dosP
P0AAP1	dgcC	P76129	dosP
P75908	dgcT	P76129	dosP
P31129	dgcZ	P76129	dosP
P0AA89	dosC	P76129	dosP
P30859	artI	P76129	dosP
P30860	artJ	P76129	dosP
P09551	argT	P76129	dosP
P0A9Q1	arcA	P76129	dosP
P0AEC3	arcB	P76129	dosP
P0AEJ4	envZ	P76129	dosP
P0A8N7	epmA	P0A6N8	yeiP
P0ABB0	atpA	P0A6N4	efp
P0A8N7	epmA	P0A6N4	efp
P76938	epmC	P0A6N4	efp
P0ADI4	entB	P10378	entE
P0A6A8	acpP	P11454	entF
P0ADI4	entB	P11454	entF
P0A7R1	rplI	P06616	era
P0AG48	rplU	P06616	era
P0A7N4	rpmF	P06616	era
P0A7L8	rpmA	P06616	era
P0A7Y0	rnc	P06616	era
P0A7L0	rplA	P06616	era
P0A7I0	prfA	P06616	era
P39453	torS	P0ACZ4	evgA
P76585	yphG	P0ACZ4	evgA
P0AEC5	barA	P0ACZ4	evgA
P07363	cheA	P0ACZ4	evgA
P0AEC3	arcB	P0ACZ4	evgA
P38506	ygdG	P09030	xthA
P04395	alkA	P09030	xthA
P0AB83	nth	P09030	xthA
P39453	torS	P77510	dpiB
P0AEC5	barA	P77510	dpiB
Q06065	atoC	P77510	dpiB
P0AEC3	arcB	P77510	dpiB
P0A7R1	rplI	P0CE47	tufA
P60422	rplB	P0CE47	tufA
P60438	rplC	P0CE47	tufA
P0A7L3	rplT	P0CE47	tufA
Q2EEQ2	ykgO	P0CE47	tufA
P0A7Q6	rpmJ	P0CE47	tufA
P0ADY7	rplP	P0CE47	tufA
P0AG48	rplU	P0CE47	tufA
P0A7N4	rpmF	P0CE47	tufA
P0A7N9	rpmG	P0CE47	tufA
P0A7L8	rpmA	P0CE47	tufA
P0A7R5	rpsJ	P0CE47	tufA
P0A7K2	rplL	P0CE47	tufA
P60624	rplX	P0CE47	tufA
P0A7L0	rplA	P0CE47	tufA
P0AA10	rplM	P0CE47	tufA
P0AG44	rplQ	P0CE47	tufA
P02413	rplO	P0CE47	tufA
P60723	rplD	P0CE47	tufA
P02359	rpsG	P0CE47	tufA
P0A7K6	rplS	P0CE47	tufA
P61175	rplV	P0CE47	tufA
P40711	arfB	P0CE47	tufA
P06616	era	P0CE47	tufA
P0A7R1	rplI	P0CE48	tufB
P60422	rplB	P0CE48	tufB
P60438	rplC	P0CE48	tufB
P0A7L3	rplT	P0CE48	tufB
Q2EEQ2	ykgO	P0CE48	tufB
P0A7Q6	rpmJ	P0CE48	tufB
P0ADY7	rplP	P0CE48	tufB
P0AG48	rplU	P0CE48	tufB
P0A7N4	rpmF	P0CE48	tufB
P0A7N9	rpmG	P0CE48	tufB
P0A7L8	rpmA	P0CE48	tufB
P0A7R5	rpsJ	P0CE48	tufB
P0A7K2	rplL	P0CE48	tufB
P60624	rplX	P0CE48	tufB
P0A7L0	rplA	P0CE48	tufB
P0AA10	rplM	P0CE48	tufB
P0AG44	rplQ	P0CE48	tufB
P02413	rplO	P0CE48	tufB
P60723	rplD	P0CE48	tufB
P02359	rpsG	P0CE48	tufB
P0A7K6	rplS	P0CE48	tufB
P61175	rplV	P0CE48	tufB
P40711	arfB	P0CE48	tufB
P06616	era	P0CE48	tufB
P0A8T7	rpoC	P21189	polB
P60240	rapA	P21189	polB
P33919	radD	P21189	polB
P15043	recQ	P21189	polB
P0A7G6	recA	P21189	polB
P38506	ygdG	P21189	polB
P0AEC5	barA	P21189	polB
P09030	xthA	P21189	polB
P05637	apaH	P0A9E5	fnr
P0AG55	rplF	P0A6M8	fusA
P0A7R1	rplI	P0A6M8	fusA
P60422	rplB	P0A6M8	fusA
P60438	rplC	P0A6M8	fusA
P62399	rplE	P0A6M8	fusA
P0A7L3	rplT	P0A6M8	fusA
Q2EEQ2	ykgO	P0A6M8	fusA
P0A7Q6	rpmJ	P0A6M8	fusA
P0ADY7	rplP	P0A6M8	fusA
P0AG48	rplU	P0A6M8	fusA
P0A7N4	rpmF	P0A6M8	fusA
P0A7N9	rpmG	P0A6M8	fusA
P0A7Z4	rpoA	P0A6M8	fusA
P0A7L8	rpmA	P0A6M8	fusA
P0A7R5	rpsJ	P0A6M8	fusA
P0A7Y0	rnc	P0A6M8	fusA
P0A8T7	rpoC	P0A6M8	fusA
P0C018	rplR	P0A6M8	fusA
P0A7K2	rplL	P0A6M8	fusA
P60624	rplX	P0A6M8	fusA
P0A7L0	rplA	P0A6M8	fusA
P0A7J3	rplJ	P0A6M8	fusA
P0AA10	rplM	P0A6M8	fusA
P0ADY3	rplN	P0A6M8	fusA
P0AG44	rplQ	P0A6M8	fusA
P02413	rplO	P0A6M8	fusA
P0A7M6	rpmC	P0A6M8	fusA
P0AG51	rpmD	P0A6M8	fusA
P60723	rplD	P0A6M8	fusA
P0A8V2	rpoB	P0A6M8	fusA
P0A7U3	rpsS	P0A6M8	fusA
P02359	rpsG	P0A6M8	fusA
P0A7W7	rpsH	P0A6M8	fusA
P0AGL2	tdcF	P0A6M8	fusA
P21507	srmB	P0A6M8	fusA
P64610	yrbL	P0A6M8	fusA
P0ADZ0	rplW	P0A6M8	fusA
P25888	rhlE	P0A6M8	fusA
P0A8J8	rhlB	P0A6M8	fusA
P0A7K6	rplS	P0A6M8	fusA
P61175	rplV	P0A6M8	fusA
P21179	katE	P0A6M8	fusA
P36659	cbpA	P0A6M8	fusA
P0A9P6	deaD	P0A6M8	fusA
P69503	apt	P0A6M8	fusA
P40711	arfB	P0A6M8	fusA
P08622	dnaJ	P0A6M8	fusA
P64610	yrbL	P0A9L3	fklB
P05637	apaH	P0A9L3	fklB
P0ADI4	entB	P19925	entD
P24255	rpoN	P30855	evgS
P52108	rstA	P30855	evgS
P38683	torT	P30855	evgS
P39453	torS	P30855	evgS
P38684	torR	P30855	evgS
P02929	tonB	P30855	evgS
P0AEV1	rssB	P30855	evgS
P18392	rstB	P30855	evgS
P64610	yrbL	P30855	evgS
P00579	rpoD	P30855	evgS
P13445	rpoS	P30855	evgS
P0AGB3	rpoH	P30855	evgS
P0DMC9	rcsA	P30855	evgS
P0DMC7	rcsB	P30855	evgS
P52076	qseB	P30855	evgS
P06959	aceF	P30855	evgS
P39838	rcsD	P30855	evgS
P0DMC5	rcsC	P30855	evgS
P23842	pdeA	P30855	evgS
P40719	qseC	P30855	evgS
P0AGA6	uhpA	P30855	evgS
Q46802	ygeV	P30855	evgS
P77269	yphF	P30855	evgS
P76585	yphG	P30855	evgS
P0AEC5	barA	P30855	evgS
P76236	cdgI	P30855	evgS
Q06065	atoC	P30855	evgS
P39404	bglJ	P30855	evgS
P0AE67	cheY	P30855	evgS
P07364	cheR	P30855	evgS
P0A964	cheW	P30855	evgS
P07330	cheB	P30855	evgS
P07363	cheA	P30855	evgS
P77302	dgcM	P30855	evgS
P38097	dgcE	P30855	evgS
P76147	dgcF	P30855	evgS
P37195	dctR	P30855	evgS
P75801	dgcI	P30855	evgS
P0AEC8	dcuS	P30855	evgS
P76237	dgcJ	P30855	evgS
P0AAP1	dgcC	P30855	evgS
P75908	dgcT	P30855	evgS
P0AEE5	mglB	P30855	evgS
P31129	dgcZ	P30855	evgS
P0AA89	dosC	P30855	evgS
P02924	araF	P30855	evgS
Q06067	atoS	P30855	evgS
P0A9Q1	arcA	P30855	evgS
P39265	alsB	P30855	evgS
P0AEC3	arcB	P30855	evgS
P0AEJ4	envZ	P30855	evgS
P76129	dosP	P30855	evgS
P0ACZ4	evgA	P30855	evgS
P77510	dpiB	P30855	evgS
P77221	yahG	P06149	dld
P0A7G6	recA	P75974	cohE
P21507	srmB	P0A9X9	cspA
P25888	rhlE	P0A9X9	cspA
P0A8J8	rhlB	P0A9X9	cspA
P0A9P6	deaD	P0A9X9	cspA
P21507	srmB	P36995	cspB
P25888	rhlE	P36995	cspB
P0A8J8	rhlB	P36995	cspB
P0A9P6	deaD	P36995	cspB
P21507	srmB	P0A982	cspH
P25888	rhlE	P0A982	cspH
P0A8J8	rhlB	P0A982	cspH
P0A9P6	deaD	P0A982	cspH
P39453	torS	P13518	csrD
P39838	rcsD	P13518	csrD
P0DMC5	rcsC	P13518	csrD
P0AEC5	barA	P13518	csrD
P07363	cheA	P13518	csrD
P38097	dgcE	P13518	csrD
P0AEC3	arcB	P13518	csrD
P76129	dosP	P13518	csrD
P30855	evgS	P13518	csrD
P39453	torS	P0ACZ8	cusR
P0AEC5	barA	P0ACZ8	cusR
P38097	dgcE	P0ACZ8	cusR
P0AEC3	arcB	P0ACZ8	cusR
P76129	dosP	P0ACZ8	cusR
P30855	evgS	P0ACZ8	cusR
P39453	torS	P77485	cusS
P39838	rcsD	P77485	cusS
P0DMC5	rcsC	P77485	cusS
P0AEC5	barA	P77485	cusS
P07363	cheA	P77485	cusS
P0AEC3	arcB	P77485	cusS
P0AEJ4	envZ	P77485	cusS
P76129	dosP	P77485	cusS
P30855	evgS	P77485	cusS
P0ACZ8	cusR	P77485	cusS
P64610	yrbL	P52086	cobC
P64610	yrbL	P0AE82	cpxA
P06959	aceF	P0AE82	cpxA
P0AGA6	uhpA	P0AE82	cpxA
P0AEC5	barA	P0AE82	cpxA
P07363	cheA	P0AE82	cpxA
P38097	dgcE	P0AE82	cpxA
P0AEC3	arcB	P0AE82	cpxA
P76129	dosP	P0AE82	cpxA
P30855	evgS	P0AE82	cpxA
P39453	torS	P08368	creB
P0AEC5	barA	P08368	creB
P38097	dgcE	P08368	creB
P0AEC3	arcB	P08368	creB
P76129	dosP	P08368	creB
P30855	evgS	P08368	creB
P64610	yrbL	P08401	creC
P06959	aceF	P08401	creC
P0AEC5	barA	P08401	creC
P07363	cheA	P08401	creC
P38097	dgcE	P08401	creC
P0AEC3	arcB	P08401	creC
P76129	dosP	P08401	creC
P30855	evgS	P08401	creC
P08368	creB	P08401	creC
P64610	yrbL	P0DM85	crfC
P77736	yahD	P0DM85	crfC
P23325	arpA	P0DM85	crfC
P05637	apaH	P0DM85	crfC
P39453	torS	P52106	csgD
P76585	yphG	P52106	csgD
P0AEC5	barA	P52106	csgD
P07363	cheA	P52106	csgD
P0AEC3	arcB	P52106	csgD
P30855	evgS	P52106	csgD
P28307	csgA	P0AEA2	csgG
P64610	yrbL	P38038	cysJ
P76387	wzc	P38038	cysJ
P0AF08	mrp	P38038	cysJ
P0A9B6	epd	P38038	cysJ
P38134	etk	P38038	cysJ
P28307	csgA	P0AE95	csgE
P21507	srmB	P0A9Y6	cspC
P25888	rhlE	P0A9Y6	cspC
P0A8J8	rhlB	P0A9Y6	cspC
P0A9P6	deaD	P0A9Y6	cspC
P21507	srmB	P0A968	cspD
P25888	rhlE	P0A968	cspD
P0A8J8	rhlB	P0A968	cspD
P0A9P6	deaD	P0A968	cspD
P21507	srmB	P0A972	cspE
P13445	rpoS	P0A972	cspE
P25888	rhlE	P0A972	cspE
P0A8J8	rhlB	P0A972	cspE
P0A9P6	deaD	P0A972	cspE
P21507	srmB	P0A976	cspF
P25888	rhlE	P0A976	cspF
P0A8J8	rhlB	P0A976	cspF
P0A9P6	deaD	P0A976	cspF
P21507	srmB	P0A986	cspI
P25888	rhlE	P0A986	cspI
P0A8J8	rhlB	P0A986	cspI
P0A9P6	deaD	P0A986	cspI
P21507	srmB	P0A978	cspG
P25888	rhlE	P0A978	cspG
P0A8J8	rhlB	P0A978	cspG
P0A9P6	deaD	P0A978	cspG
P32141	yihT	P32144	csqR
P0AFX7	rseA	P69913	csrA
P0AGB6	rpoE	P69913	csrA
P00579	rpoD	P69913	csrA
P13445	rpoS	P69913	csrA
P0AGB3	rpoH	P69913	csrA
P0ABS1	dksA	P69913	csrA
P13518	csrD	P69913	csrA
P0A8V2	rpoB	P0A6H1	clpX
P0A7U3	rpsS	P76290	cmoA
P02359	rpsG	P76290	cmoA
P0A7W7	rpsH	P76290	cmoA
P13445	rpoS	P0A9Q7	adhE
P31119	aas	P0A9Q7	adhE
P52108	rstA	P50466	aer
P39453	torS	P50466	aer
P38684	torR	P50466	aer
P0AEV1	rssB	P50466	aer
P52076	qseB	P50466	aer
P39838	rcsD	P50466	aer
P0DMC5	rcsC	P50466	aer
P0AEC5	barA	P50466	aer
P0AE67	cheY	P50466	aer
P07364	cheR	P50466	aer
P0A964	cheW	P50466	aer
P07330	cheB	P50466	aer
P07363	cheA	P50466	aer
P0A9Q1	arcA	P50466	aer
P0AEC3	arcB	P50466	aer
P76129	dosP	P50466	aer
P30855	evgS	P50466	aer
P0ACZ8	cusR	P50466	aer
P08368	creB	P50466	aer
P21179	katE	P0AE08	ahpC
P36659	cbpA	P0AE08	ahpC
P0A6F5	groL	P0AE08	ahpC
P08622	dnaJ	P0AE08	ahpC
P0A6M8	fusA	P0AE08	ahpC
P75952	comR	P0AB40	bhsA
P64610	yrbL	P0A9A6	ftsZ
P0A6A8	acpP	P0A953	fabB
P0ADI4	entB	P0A953	fabB
P38038	cysJ	P0A9B2	gapA
P0A6A8	acpP	P0AAI5	fabF
P0ADI4	entB	P0AAI5	fabF
P07003	poxB	P21177	fadB
P60584	caiA	P21177	fadB
P21179	katE	P21177	fadB
P33224	aidB	P21177	fadB
P0AGB6	rpoE	P37661	eptB
P0A8F4	udk	P0ACZ2	etp
P38134	etk	P0ACZ2	etp
P0A6A8	acpP	P0AAI9	fabD
P0ADI4	entB	P0AAI9	fabD
P0A6A8	acpP	P0A6R0	fabH
P0ADI4	entB	P0A6R0	fabH
P0A6A8	acpP	P0AEK2	fabG
P07003	poxB	P77399	fadJ
P60584	caiA	P77399	fadJ
P21179	katE	P77399	fadJ
P33224	aidB	P77399	fadJ
P0A9E2	soxS	P0AC53	zwf
P52045	scpB	Q47146	fadE
P0AGG2	tesB	Q47146	fadE
P21179	katE	Q47146	fadE
P31551	caiD	Q47146	fadE
P21177	fadB	Q47146	fadE
P0AEK2	fabG	Q47146	fadE
P77399	fadJ	Q47146	fadE
P13445	rpoS	P37639	gadX
P63201	gadW	P37639	gadX
P63201	gadW	P63204	gadE
P37639	gadX	P63204	gadE
P0A6Q3	fabA	P0A8V6	fadR
P0A953	fabB	P0A8V6	fadR
P0A6A8	acpP	P38135	fadK
P11454	entF	P13039	fes
P37127	aegA	P0A9R4	fdx
P09546	putA	P0ACJ8	crp
P00944	xylA	P0ACJ8	crp
P36683	acnB	P0ACJ8	crp
P05637	apaH	P0ACJ8	crp
P25516	acnA	P0ACJ8	crp
P0AC33	fumA	P0ACJ8	crp
P69913	csrA	P15078	cstA
Q59385	copA	P0A9G4	cueR
P30855	evgS	P11557	damX
P13445	rpoS	P00936	cyaA
P77221	yahG	P0A6J5	dadA
P33224	aidB	P0A6J5	dadA
P0A7Z4	rpoA	P0AE85	cpxP
P39453	torS	P0AE88	cpxR
P0AEC5	barA	P0AE88	cpxR
P38097	dgcE	P0AE88	cpxR
P0AEC3	arcB	P0AE88	cpxR
P0AEJ4	envZ	P0AE88	cpxR
P76129	dosP	P0AE88	cpxR
P30855	evgS	P0AE88	cpxR
P0AE82	cpxA	P0AE88	cpxR
P52106	csgD	P0AE88	cpxR
P50466	aer	P0AE88	cpxR
P0AE85	cpxP	P0AE88	cpxR
P22333	add	P0AEW4	cpdA
P77736	yahD	P0ABJ1	cyoA
P28307	csgA	P0A6M2	dsbB
P64610	yrbL	P0AA86	dsbE
P77212	rclA	P0AA86	dsbE
P77736	yahD	P0AA86	dsbE
P36659	cbpA	P0AA86	dsbE
P0A6F5	groL	P0AA86	dsbE
P06610	btuE	P0AA86	dsbE
P23325	arpA	P0AA86	dsbE
P08622	dnaJ	P0AA86	dsbE
P0AE08	ahpC	P0AA86	dsbE
P00811	ampC	P46068	dsdC
P0AE67	cheY	P0ABZ1	fliG
P13445	rpoS	P52627	fliZ
P0C0K3	srkA	P0AEG4	dsbA
P24255	rpoN	P29744	flgL
P0DMC7	rcsB	P0ABY7	flhC
P0DMC7	rcsB	P0A8S9	flhD
P0AE67	cheY	P06974	fliM
P52108	rstA	P15070	fliN
P39453	torS	P15070	fliN
P38684	torR	P15070	fliN
P0AEV1	rssB	P15070	fliN
P52076	qseB	P15070	fliN
P0DMC5	rcsC	P15070	fliN
P0AE67	cheY	P15070	fliN
P07330	cheB	P15070	fliN
P0A9Q1	arcA	P15070	fliN
P0AEC3	arcB	P15070	fliN
P30855	evgS	P15070	fliN
P0ACZ8	cusR	P15070	fliN
P08368	creB	P15070	fliN
P0AE88	cpxR	P15070	fliN
P22586	fliO	P0AC05	fliP
P76129	dosP	P0AEM9	fliY
P0AEC8	dcuS	P0AEF4	dpiA
P77510	dpiB	P0AEF4	dpiA
P13445	rpoS	P0AEM6	fliA
P69913	csrA	P0AEM6	fliA
P52627	fliZ	P0AEM6	fliA
P0A8S9	flhD	P0AEM6	fliA
P0AEM4	flgM	P0AEM6	fliA
P24255	rpoN	P04949	fliC
P52627	fliZ	P04949	fliC
P22586	fliO	P04949	fliC
P0A8V2	rpoB	Q47155	dinB
P14294	topB	Q47155	dinB
P13445	rpoS	Q47155	dinB
P60240	rapA	Q47155	dinB
P15043	recQ	Q47155	dinB
P0A7G6	recA	Q47155	dinB
P77736	yahD	Q47155	dinB
P38506	ygdG	Q47155	dinB
P23325	arpA	Q47155	dinB
P21189	polB	Q47155	dinB
P60422	rplB	P03007	dnaQ
P60438	rplC	P03007	dnaQ
P0A7J3	rplJ	P03007	dnaQ
P0ADY3	rplN	P03007	dnaQ
P0A7Z4	rpoA	P0A988	dnaN
P0A8T7	rpoC	P0A988	dnaN
P0A8V2	rpoB	P0A988	dnaN
P14294	topB	P0A988	dnaN
P06612	topA	P0A988	dnaN
P60240	rapA	P0A988	dnaN
P15043	recQ	P0A988	dnaN
P0A7G6	recA	P0A988	dnaN
P77736	yahD	P0A988	dnaN
P38506	ygdG	P0A988	dnaN
P23325	arpA	P0A988	dnaN
P09030	xthA	P0A988	dnaN
P21189	polB	P0A988	dnaN
Q47155	dinB	P0A988	dnaN
P0A7Z4	rpoA	P37650	bcsC
P0A8T7	rpoC	P37650	bcsC
P30176	ybiA	P37650	bcsC
P0A8V2	rpoB	P37650	bcsC
P39453	torS	P37650	bcsC
P0DMC9	rcsA	P37650	bcsC
P0DMC7	rcsB	P37650	bcsC
P33919	radD	P37650	bcsC
P0DMC5	rcsC	P37650	bcsC
P77736	yahD	P37650	bcsC
P0AGA6	uhpA	P37650	bcsC
P56258	wecF	P37650	bcsC
P0AEC5	barA	P37650	bcsC
Q06065	atoC	P37650	bcsC
P36659	cbpA	P37650	bcsC
P39404	bglJ	P37650	bcsC
P39099	degQ	P37650	bcsC
P38097	dgcE	P37650	bcsC
P37195	dctR	P37650	bcsC
P45523	fkpA	P37650	bcsC
P23325	arpA	P37650	bcsC
P05637	apaH	P37650	bcsC
P0AEC3	arcB	P37650	bcsC
P08622	dnaJ	P37650	bcsC
P76129	dosP	P37650	bcsC
P0ACZ4	evgA	P37650	bcsC
P0A9L3	fklB	P37650	bcsC
P30855	evgS	P37650	bcsC
P52106	csgD	P37650	bcsC
P0A8F4	udk	P0ABF6	cdd
P69503	apt	P0ABF6	cdd
P22333	add	P0ABF6	cdd
P12999	bioC	P0ABF6	cdd
P39453	torS	P30843	basR
P0DMC7	rcsB	P30843	basR
P40719	qseC	P30843	basR
P0AEC5	barA	P30843	basR
P38097	dgcE	P30843	basR
P0AEC3	arcB	P30843	basR
P76129	dosP	P30843	basR
P30855	evgS	P30843	basR
P50466	aer	P30843	basR
P15070	fliN	P30843	basR
P0AFX4	rsd	P00722	lacZ
P0ACJ8	crp	P00722	lacZ
P0A7U3	rpsS	P76291	cmoB
P02359	rpsG	P76291	cmoB
P0A7W7	rpsH	P76291	cmoB
P39453	torS	P69228	baeR
P0AEC5	barA	P69228	baeR
P38097	dgcE	P69228	baeR
P0AEC3	arcB	P69228	baeR
P76129	dosP	P69228	baeR
P30855	evgS	P69228	baeR
P08401	creC	P69228	baeR
P50466	aer	P69228	baeR
P15070	fliN	P69228	baeR
P08368	creB	P66948	bepA
P0AE88	cpxR	P66948	bepA
P69228	baeR	P66948	bepA
P64610	yrbL	P30847	baeS
P06959	aceF	P30847	baeS
P0AEC5	barA	P30847	baeS
P07363	cheA	P30847	baeS
P38097	dgcE	P30847	baeS
P0AEC3	arcB	P30847	baeS
P76129	dosP	P30847	baeS
P30855	evgS	P30847	baeS
P69228	baeR	P30847	baeS
P39453	torS	P30844	basS
P64610	yrbL	P30844	basS
P52076	qseB	P30844	basS
P06959	aceF	P30844	basS
P0DMC5	rcsC	P30844	basS
P0AEC5	barA	P30844	basS
P07363	cheA	P30844	basS
P38097	dgcE	P30844	basS
P0AEC3	arcB	P30844	basS
P76129	dosP	P30844	basS
P30855	evgS	P30844	basS
P30843	basR	P30844	basS
P52108	rstA	P0A9H9	cheZ
P39453	torS	P0A9H9	cheZ
P38684	torR	P0A9H9	cheZ
P0AEV1	rssB	P0A9H9	cheZ
P52076	qseB	P0A9H9	cheZ
P0DMC5	rcsC	P0A9H9	cheZ
P0AE67	cheY	P0A9H9	cheZ
P07330	cheB	P0A9H9	cheZ
P0A9Q1	arcA	P0A9H9	cheZ
P0AEC3	arcB	P0A9H9	cheZ
P30855	evgS	P0A9H9	cheZ
P0ACZ8	cusR	P0A9H9	cheZ
P08368	creB	P0A9H9	cheZ
P0AE88	cpxR	P0A9H9	cheZ
P30843	basR	P0A9H9	cheZ
P69228	baeR	P0A9H9	cheZ
P04395	alkA	P05523	mutM
P60422	rplB	P10121	ftsY
P60438	rplC	P10121	ftsY
P62399	rplE	P10121	ftsY
P60624	rplX	P10121	ftsY
P0A7L0	rplA	P10121	ftsY
P0ADY3	rplN	P10121	ftsY
P02413	rplO	P10121	ftsY
P60723	rplD	P10121	ftsY
P0A7W7	rpsH	P10121	ftsY
P0AGA2	secY	P10121	ftsY
P0ADZ0	rplW	P10121	ftsY
P0A9R7	ftsE	P10121	ftsY
P0A8F4	udk	P0A6T1	pgi
P56258	wecF	P0A6T1	pgi
P69503	apt	P0A6T1	pgi
P0A6M8	fusA	P0A6T1	pgi
P76062	racR	P18956	ggt
P0A8F4	udk	P75913	ghrA
P0DMC7	rcsB	P0ADH5	fimB
P00811	ampC	P0A9F6	gcvA
P0A9F6	gcvA	P0A9I3	gcvR
P24255	rpoN	P23484	fecI
P36929	rsmB	P23484	fecI
P39453	torS	P0AEL8	fimZ
P76585	yphG	P0AEL8	fimZ
P0AEC5	barA	P0AEL8	fimZ
P07363	cheA	P0AEL8	fimZ
P0AEC3	arcB	P0AEL8	fimZ
P30855	evgS	P0AEL8	fimZ
P37650	bcsC	P0AEL8	fimZ
P04128	fimA	P0AEL8	fimZ
P63204	gadE	P37338	glaR
P77221	yahG	P0AEP9	glcD
P06959	aceF	P0A6T9	gcvH
P0A6A8	acpP	P0A6T9	gcvH
P33195	gcvP	P0A6T9	gcvH
P27248	gcvT	P0A6T9	gcvH
P21507	srmB	P60560	guaC
P25888	rhlE	P60560	guaC
P0A8J8	rhlB	P60560	guaC
P77736	yahD	P60560	guaC
P0A9P6	deaD	P60560	guaC
P69503	apt	P60560	guaC
P23325	arpA	P60560	guaC
P22333	add	P60560	guaC
P0A6M8	fusA	P60560	guaC
P0AE08	ahpC	P60560	guaC
P0DMC7	rcsB	P10151	leuO
P77359	djlC	P33232	lldD
P06149	dld	P33232	lldD
P0A6J5	dadA	P33232	lldD
P0AEP9	glcD	P33232	lldD
P13445	rpoS	P0AEX3	kgtP
P0ACJ8	crp	P0AEX3	kgtP
P0AGA2	secY	P00803	lepB
P21179	katE	P0A9M0	lon
P39099	degQ	P0A9M0	lon
P0A6A8	acpP	P0A722	lpxA
P0ADI4	entB	P0A722	lpxA
P0A6T9	gcvH	P32099	lplA
P0AFG3	sucA	P0A9P0	lpdA
P06959	aceF	P0A9P0	lpdA
P0AA86	dsbE	P0A9P0	lpdA
P0A7Z4	rpoA	P00582	polA
P0A800	rpoZ	P00582	polA
P0A8T7	rpoC	P00582	polA
P0A8V2	rpoB	P00582	polA
P14294	topB	P00582	polA
P06612	topA	P00582	polA
P60240	rapA	P00582	polA
P33919	radD	P00582	polA
P15043	recQ	P00582	polA
P0A7G6	recA	P00582	polA
P77736	yahD	P00582	polA
P38506	ygdG	P00582	polA
P23325	arpA	P00582	polA
P09030	xthA	P00582	polA
P21189	polB	P00582	polA
Q47155	dinB	P00582	polA
P0A988	dnaN	P00582	polA
P00363	frdA	P0AC47	frdB
P60438	rplC	Q47013	elaD
P0A7J3	rplJ	Q47013	elaD
P0A6T9	gcvH	P60716	lipA
P0AG55	rplF	P69222	infA
P60422	rplB	P69222	infA
P60438	rplC	P69222	infA
P62399	rplE	P69222	infA
P0ADY7	rplP	P69222	infA
P0A7R5	rpsJ	P69222	infA
P0C018	rplR	P69222	infA
P60624	rplX	P69222	infA
P0A7L0	rplA	P69222	infA
P0A7J3	rplJ	P69222	infA
P0AA10	rplM	P69222	infA
P0ADY3	rplN	P69222	infA
P02413	rplO	P69222	infA
P0A7M6	rpmC	P69222	infA
P0AG51	rpmD	P69222	infA
P60723	rplD	P69222	infA
P0A7U3	rpsS	P69222	infA
P02359	rpsG	P69222	infA
P0A7W7	rpsH	P69222	infA
P0ADZ0	rplW	P69222	infA
P61175	rplV	P69222	infA
P0AG55	rplF	P0A705	infB
P0A7R1	rplI	P0A705	infB
P60422	rplB	P0A705	infB
P60438	rplC	P0A705	infB
P62399	rplE	P0A705	infB
P0A7L3	rplT	P0A705	infB
Q2EEQ2	ykgO	P0A705	infB
P0A7Q6	rpmJ	P0A705	infB
P0ADY7	rplP	P0A705	infB
P0AG48	rplU	P0A705	infB
P0A7N4	rpmF	P0A705	infB
P0A7N9	rpmG	P0A705	infB
P0A7L8	rpmA	P0A705	infB
P0A7R5	rpsJ	P0A705	infB
P0A7Y0	rnc	P0A705	infB
P0C018	rplR	P0A705	infB
P0A7K2	rplL	P0A705	infB
P60624	rplX	P0A705	infB
P0A7L0	rplA	P0A705	infB
P0A7J3	rplJ	P0A705	infB
P0AA10	rplM	P0A705	infB
P0ADY3	rplN	P0A705	infB
P0AG44	rplQ	P0A705	infB
P02413	rplO	P0A705	infB
P0A7M6	rpmC	P0A705	infB
P0AG51	rpmD	P0A705	infB
P60723	rplD	P0A705	infB
P0A7U3	rpsS	P0A705	infB
P02359	rpsG	P0A705	infB
P0A7W7	rpsH	P0A705	infB
P0ADZ0	rplW	P0A705	infB
P0A7K6	rplS	P0A705	infB
P61175	rplV	P0A705	infB
P40711	arfB	P0A705	infB
P60422	rplB	P0A707	infC
P60438	rplC	P0A707	infC
P0A7L3	rplT	P0A707	infC
P0ADY7	rplP	P0A707	infC
P0AG48	rplU	P0A707	infC
P0A7N9	rpmG	P0A707	infC
P0A7L8	rpmA	P0A707	infC
P0A7R5	rpsJ	P0A707	infC
P0A7Y0	rnc	P0A707	infC
P0A7K2	rplL	P0A707	infC
P60624	rplX	P0A707	infC
P0A7L0	rplA	P0A707	infC
P0AA10	rplM	P0A707	infC
P0AG44	rplQ	P0A707	infC
P60723	rplD	P0A707	infC
P02359	rpsG	P0A707	infC
P0A7K6	rplS	P0A707	infC
P61175	rplV	P0A707	infC
P40711	arfB	P0A707	infC
P0A705	infB	P0A707	infC
P0A7G6	recA	P0A7C2	lexA
P0A6A8	acpP	P60720	lipB
P0ADI4	entB	P60720	lipB
P0A6T9	gcvH	P60720	lipB
P0A6A8	acpP	P21645	lpxD
P0ADI4	entB	P21645	lpxD
P39453	torS	P0AFG6	sucB
P18392	rstB	P0AFG6	sucB
P77212	rclA	P0AFG6	sucB
P0AFG3	sucA	P0AFG6	sucB
P39838	rcsD	P0AFG6	sucB
P0DMC5	rcsC	P0AFG6	sucB
P40719	qseC	P0AFG6	sucB
P0AEC5	barA	P0AFG6	sucB
P0AEJ4	envZ	P0AFG6	sucB
P30855	evgS	P0AFG6	sucB
P0AE82	cpxA	P0AFG6	sucB
P08401	creC	P0AFG6	sucB
P30847	baeS	P0AFG6	sucB
P30844	basS	P0AFG6	sucB
P0A6T9	gcvH	P0AFG6	sucB
P0A9P0	lpdA	P0AFG6	sucB
P0A7Y0	rnc	P0A910	ompA
P0AE82	cpxA	P06996	ompC
P39453	torS	P0AA16	ompR
P18392	rstB	P0AA16	ompR
P0DMC7	rcsB	P0AA16	ompR
P0AGA6	uhpA	P0AA16	ompR
P0AEC5	barA	P0AA16	ompR
P07363	cheA	P0AA16	ompR
P38097	dgcE	P0AA16	ompR
P0AEC3	arcB	P0AA16	ompR
P0AEJ4	envZ	P0AA16	ompR
P76129	dosP	P0AA16	ompR
P0ADB7	ecnB	P0AA16	ompR
P30855	evgS	P0AA16	ompR
P0AE82	cpxA	P0AA16	ompR
P52106	csgD	P0AA16	ompR
P0A6H1	clpX	P0AA16	ompR
P50466	aer	P0AA16	ompR
P77304	dtpA	P0AA16	ompR
P0A8S9	flhD	P0AA16	ompR
P15070	fliN	P0AA16	ompR
P0A9H9	cheZ	P0AA16	ompR
P06996	ompC	P0AA16	ompR
P0A9E2	soxS	P0A915	ompW
P0AGG2	tesB	P0A7A7	plsB
P0ADI4	entB	P0A7A7	plsB
P21177	fadB	P0A7A7	plsB
P0AEK2	fabG	P0A7A7	plsB
P77399	fadJ	P0A7A7	plsB
Q47146	fadE	P0A7A7	plsB
P0A8V6	fadR	P0A7A7	plsB
P0A6A8	acpP	P26647	plsC
P0ADI4	entB	P26647	plsC
P0A6A8	acpP	P27247	plsX
P0AE08	ahpC	P76342	msrP
P0AEN1	fre	P76342	msrP
P39453	torS	P77338	mscK
P60240	rapA	P77338	mscK
P39838	rcsD	P77338	mscK
P0DMC5	rcsC	P77338	mscK
P0AEC5	barA	P77338	mscK
P07363	cheA	P77338	mscK
P38097	dgcE	P77338	mscK
P05637	apaH	P77338	mscK
P0AEC3	arcB	P77338	mscK
P76129	dosP	P77338	mscK
P30855	evgS	P77338	mscK
P11557	damX	P77338	mscK
P00722	lacZ	P0ADB1	osmE
P0A9P4	trxB	P0ACQ4	oxyR
P21179	katE	P0ACQ4	oxyR
P0AE08	ahpC	P0ACQ4	oxyR
P0ACJ8	crp	P0ACQ4	oxyR
P39453	torS	P08400	phoR
P39838	rcsD	P08400	phoR
P0DMC5	rcsC	P08400	phoR
P0AEC5	barA	P08400	phoR
P07363	cheA	P08400	phoR
P29680	hemE	P08400	phoR
P0AEC3	arcB	P08400	phoR
P0AEJ4	envZ	P08400	phoR
P76129	dosP	P08400	phoR
P30855	evgS	P08400	phoR
P0AE82	cpxA	P08400	phoR
P0AA16	ompR	P08400	phoR
P45469	yraR	P0AFD1	nuoE
P39315	qorB	P0AFD1	nuoE
P0AF08	mrp	P0AFD1	nuoE
P0A6A8	acpP	P0AFD1	nuoE
P39453	torS	P0AFB8	glnG
P39838	rcsD	P0AFB8	glnG
P0DMC5	rcsC	P0AFB8	glnG
P76585	yphG	P0AFB8	glnG
P0AEC5	barA	P0AFB8	glnG
P07363	cheA	P0AFB8	glnG
P38097	dgcE	P0AFB8	glnG
P0AEC8	dcuS	P0AFB8	glnG
P0AEC3	arcB	P0AFB8	glnG
P76129	dosP	P0AFB8	glnG
P77510	dpiB	P0AFB8	glnG
P30855	evgS	P0AFB8	glnG
P37650	bcsC	P0AFB8	glnG
P24255	rpoN	P0AFB5	glnL
P39453	torS	P0AFB5	glnL
P39838	rcsD	P0AFB5	glnL
P0DMC5	rcsC	P0AFB5	glnL
P0AEC5	barA	P0AFB5	glnL
P0AE67	cheY	P0AFB5	glnL
P07363	cheA	P0AFB5	glnL
P69681	amtB	P0AFB5	glnL
P0AEC3	arcB	P0AFB5	glnL
P0AEJ4	envZ	P0AFB5	glnL
P30855	evgS	P0AFB5	glnL
P0AE82	cpxA	P0AFB5	glnL
P0AA16	ompR	P0AFB5	glnL
P0AFB8	glnG	P0AFB5	glnL
P64610	yrbL	P0A763	ndk
P21179	katE	P0A763	ndk
P69503	apt	P0A763	ndk
P0DM85	crfC	P0A763	ndk
P60560	guaC	P0A763	ndk
P45469	yraR	P0AFC3	nuoA
P39315	qorB	P0AFC3	nuoA
P0A6A8	acpP	P0AFC3	nuoA
P0AFD1	nuoE	P0AFC3	nuoA
P39453	torS	P0AFJ5	phoB
P00634	phoA	P0AFJ5	phoB
P0AEC5	barA	P0AFJ5	phoB
P38097	dgcE	P0AFJ5	phoB
P0AEC3	arcB	P0AFJ5	phoB
P0AEJ4	envZ	P0AFJ5	phoB
P76129	dosP	P0AFJ5	phoB
P30855	evgS	P0AFJ5	phoB
P0AE82	cpxA	P0AFJ5	phoB
P50466	aer	P0AFJ5	phoB
P15070	fliN	P0AFJ5	phoB
P66948	bepA	P0AFJ5	phoB
P0A9H9	cheZ	P0AFJ5	phoB
P08400	phoR	P0AFJ5	phoB
P0AFB5	glnL	P0AFJ5	phoB
P39453	torS	P23836	phoP
P18392	rstB	P23836	phoP
P40719	qseC	P23836	phoP
P64554	queE	P23836	phoP
P0AGA6	uhpA	P23836	phoP
P0AEC5	barA	P23836	phoP
P38097	dgcE	P23836	phoP
P0AEC3	arcB	P23836	phoP
P0AEJ4	envZ	P23836	phoP
P76129	dosP	P23836	phoP
P30855	evgS	P23836	phoP
P50466	aer	P23836	phoP
P30845	eptA	P23836	phoP
P37661	eptB	P23836	phoP
P15070	fliN	P23836	phoP
P30844	basS	P23836	phoP
P0A9H9	cheZ	P23836	phoP
P0AA16	ompR	P23836	phoP
P08400	phoR	P23836	phoP
P21179	katE	P0AC86	glgP
P0A6T1	pgi	P0AC86	glgP
P02930	tolC	P02931	ompF
P75989	bluR	P02931	ompF
P0AEJ4	envZ	P02931	ompF
P0AE82	cpxA	P02931	ompF
P06996	ompC	P02931	ompF
P0AA16	ompR	P02931	ompF
P52045	scpB	P0AFI0	oxc
P31551	caiD	P0AFI0	oxc
P21177	fadB	P0AFI0	oxc
P77399	fadJ	P0AFI0	oxc
P23836	phoP	P37001	pagP
P45469	yraR	P0AFE8	nuoM
P39315	qorB	P0AFE8	nuoM
P0A6A8	acpP	P0AFE8	nuoM
P0AFD1	nuoE	P0AFE8	nuoM
P0AFC3	nuoA	P0AFE8	nuoM
P38393	kilR	P0AFG0	nusG
P36999	rlmA	P0AFC7	nuoB
P25397	tehB	P0AFC7	nuoB
P45469	yraR	P0AFC7	nuoB
P39315	qorB	P0AFC7	nuoB
P0A887	ubiE	P0AFC7	nuoB
P76387	wzc	P0AFC7	nuoB
P60584	caiA	P0AFC7	nuoB
P0AF08	mrp	P0AFC7	nuoB
P12999	bioC	P0AFC7	nuoB
P0A6A8	acpP	P0AFC7	nuoB
P33224	aidB	P0AFC7	nuoB
P38134	etk	P0AFC7	nuoB
P76290	cmoA	P0AFC7	nuoB
Q47146	fadE	P0AFC7	nuoB
P76291	cmoB	P0AFC7	nuoB
P0AFD1	nuoE	P0AFC7	nuoB
P0AFC3	nuoA	P0AFC7	nuoB
P0AFE8	nuoM	P0AFC7	nuoB
P06612	topA	P75960	cobB
P77736	yahD	P75960	cobB
P27550	acs	P75960	cobB
P23325	arpA	P75960	cobB
P00363	frdA	P75960	cobB
P39452	nrdE	P0AC65	nrdH
P0AA86	dsbE	P0AC65	nrdH
P0CE47	tufA	P0A6P1	tsf
P0CE48	tufB	P0A6P1	tsf
P0A9M0	lon	P04335	frsA
P37349	dhaM	P32152	frvR
P0ABB8	mgtA	P0ABC7	hflK
P0AAI3	ftsH	P0ABC7	hflK
P00579	rpoD	P0A6X3	hfq
P13445	rpoS	P0A6X3	hfq
P0AGB3	rpoH	P0A6X3	hfq
P0ABS1	dksA	P0A6X3	hfq
P09030	xthA	P0A6X3	hfq
P52106	csgD	P0A6X3	hfq
P69913	csrA	P0A6X3	hfq
P0ACJ8	crp	P0A6X3	hfq
P0A910	ompA	P0A6X3	hfq
[truncated: 3,424 more rows]

## Sheet: GO
UniprotID_p1	GeneName_p1	UniprotID_p2	GeneName_p2
P0AG55	rplF	P0A7R1	rplI
P75817	rlmC	P36999	rlmA
P0AG55	rplF	P0C0R7	rlmE
P63177	rlmB	P0C0R7	rlmE
P0AG55	rplF	P60422	rplB
P0A7R1	rplI	P60422	rplB
P0C0R7	rlmE	P60422	rplB
P0AG55	rplF	P60438	rplC
P0A7R1	rplI	P60438	rplC
P0C0R7	rlmE	P60438	rplC
P60422	rplB	P60438	rplC
P0AG55	rplF	P62399	rplE
P0A7R1	rplI	P62399	rplE
P0C0R7	rlmE	P62399	rplE
P60422	rplB	P62399	rplE
P60438	rplC	P62399	rplE
P0AG55	rplF	P0A7L3	rplT
P0A7R1	rplI	P0A7L3	rplT
P0C0R7	rlmE	P0A7L3	rplT
P60422	rplB	P0A7L3	rplT
P60438	rplC	P0A7L3	rplT
P62399	rplE	P0A7L3	rplT
P0AG55	rplF	Q2EEQ2	ykgO
P0A7R1	rplI	Q2EEQ2	ykgO
P60422	rplB	Q2EEQ2	ykgO
P60438	rplC	Q2EEQ2	ykgO
P62399	rplE	Q2EEQ2	ykgO
P0A7L3	rplT	Q2EEQ2	ykgO
P0AG55	rplF	P0A7Q6	rpmJ
P0A7R1	rplI	P0A7Q6	rpmJ
P60422	rplB	P0A7Q6	rpmJ
P60438	rplC	P0A7Q6	rpmJ
P62399	rplE	P0A7Q6	rpmJ
P0A7L3	rplT	P0A7Q6	rpmJ
Q2EEQ2	ykgO	P0A7Q6	rpmJ
P76104	rlhA	P0AA37	rluA
P0AG55	rplF	P0ADY7	rplP
P0A7R1	rplI	P0ADY7	rplP
P0C0R7	rlmE	P0ADY7	rplP
P60422	rplB	P0ADY7	rplP
P60438	rplC	P0ADY7	rplP
P62399	rplE	P0ADY7	rplP
P0A7L3	rplT	P0ADY7	rplP
Q2EEQ2	ykgO	P0ADY7	rplP
P0A7Q6	rpmJ	P0ADY7	rplP
P0AG55	rplF	P0AG48	rplU
P0A7R1	rplI	P0AG48	rplU
P60422	rplB	P0AG48	rplU
P60438	rplC	P0AG48	rplU
P62399	rplE	P0AG48	rplU
P0A7L3	rplT	P0AG48	rplU
Q2EEQ2	ykgO	P0AG48	rplU
P0A7Q6	rpmJ	P0AG48	rplU
P0ADY7	rplP	P0AG48	rplU
P0AG55	rplF	P0A7N4	rpmF
P0A7R1	rplI	P0A7N4	rpmF
P0C0R7	rlmE	P0A7N4	rpmF
P60422	rplB	P0A7N4	rpmF
P60438	rplC	P0A7N4	rpmF
P62399	rplE	P0A7N4	rpmF
P0A7L3	rplT	P0A7N4	rpmF
Q2EEQ2	ykgO	P0A7N4	rpmF
P0A7Q6	rpmJ	P0A7N4	rpmF
P0ADY7	rplP	P0A7N4	rpmF
P0AG48	rplU	P0A7N4	rpmF
P0AG55	rplF	P0A7N9	rpmG
P0A7R1	rplI	P0A7N9	rpmG
P0C0R7	rlmE	P0A7N9	rpmG
P60422	rplB	P0A7N9	rpmG
P60438	rplC	P0A7N9	rpmG
P62399	rplE	P0A7N9	rpmG
P0A7L3	rplT	P0A7N9	rpmG
Q2EEQ2	ykgO	P0A7N9	rpmG
P0A7Q6	rpmJ	P0A7N9	rpmG
P0ADY7	rplP	P0A7N9	rpmG
P0AG48	rplU	P0A7N9	rpmG
P0A7N4	rpmF	P0A7N9	rpmG
P0AG55	rplF	P0A7P5	rpmH
P0A7R1	rplI	P0A7P5	rpmH
P60422	rplB	P0A7P5	rpmH
P60438	rplC	P0A7P5	rpmH
P62399	rplE	P0A7P5	rpmH
P0A7L3	rplT	P0A7P5	rpmH
Q2EEQ2	ykgO	P0A7P5	rpmH
P0A7Q6	rpmJ	P0A7P5	rpmH
P0ADY7	rplP	P0A7P5	rpmH
P0AG48	rplU	P0A7P5	rpmH
P0A7N4	rpmF	P0A7P5	rpmH
P0A7N9	rpmG	P0A7P5	rpmH
P0AG55	rplF	P0A7Q1	rpmI
P0A7R1	rplI	P0A7Q1	rpmI
P60422	rplB	P0A7Q1	rpmI
P60438	rplC	P0A7Q1	rpmI
P62399	rplE	P0A7Q1	rpmI
P0A7L3	rplT	P0A7Q1	rpmI
Q2EEQ2	ykgO	P0A7Q1	rpmI
P0A7Q6	rpmJ	P0A7Q1	rpmI
P0ADY7	rplP	P0A7Q1	rpmI
P0AG48	rplU	P0A7Q1	rpmI
P0A7N4	rpmF	P0A7Q1	rpmI
P0A7N9	rpmG	P0A7Q1	rpmI
P0A7P5	rpmH	P0A7Q1	rpmI
P0AG55	rplF	P0A7L8	rpmA
P0A7R1	rplI	P0A7L8	rpmA
P0C0R7	rlmE	P0A7L8	rpmA
P60422	rplB	P0A7L8	rpmA
P60438	rplC	P0A7L8	rpmA
P62399	rplE	P0A7L8	rpmA
P0A7L3	rplT	P0A7L8	rpmA
Q2EEQ2	ykgO	P0A7L8	rpmA
P0A7Q6	rpmJ	P0A7L8	rpmA
P0ADY7	rplP	P0A7L8	rpmA
P0AG48	rplU	P0A7L8	rpmA
P0A7N4	rpmF	P0A7L8	rpmA
P0A7N9	rpmG	P0A7L8	rpmA
P0A7P5	rpmH	P0A7L8	rpmA
P0A7Q1	rpmI	P0A7L8	rpmA
P0AG55	rplF	P0A7R5	rpsJ
P0A7R1	rplI	P0A7R5	rpsJ
P60422	rplB	P0A7R5	rpsJ
P60438	rplC	P0A7R5	rpsJ
P62399	rplE	P0A7R5	rpsJ
P0A7L3	rplT	P0A7R5	rpsJ
Q2EEQ2	ykgO	P0A7R5	rpsJ
P0A7Q6	rpmJ	P0A7R5	rpsJ
P0ADY7	rplP	P0A7R5	rpsJ
P0AG48	rplU	P0A7R5	rpsJ
P0A7N4	rpmF	P0A7R5	rpsJ
P0A7N9	rpmG	P0A7R5	rpsJ
P0A7P5	rpmH	P0A7R5	rpsJ
P0A7Q1	rpmI	P0A7R5	rpsJ
P0A7L8	rpmA	P0A7R5	rpsJ
P75817	rlmC	P75782	rlmF
P36999	rlmA	P75782	rlmF
P75817	rlmC	P75864	rlmL
P36999	rlmA	P75864	rlmL
P75782	rlmF	P75864	rlmL
P0AG55	rplF	P33643	rluD
P0C0R7	rlmE	P33643	rluD
P60422	rplB	P33643	rluD
P60438	rplC	P33643	rluD
P62399	rplE	P33643	rluD
P0A7L3	rplT	P33643	rluD
P0AA37	rluA	P33643	rluD
P0ADY7	rplP	P33643	rluD
P0A7N4	rpmF	P33643	rluD
P0A7N9	rpmG	P33643	rluD
P0A7L8	rpmA	P33643	rluD
P76104	rlhA	P0A9J0
P0AA37	rluA	P0A9J0
P0AG55	rplF	P36979	rlmN
P75817	rlmC	P36979	rlmN
P36999	rlmA	P36979	rlmN
P0A7N9	rpmG	P36979	rlmN
P75782	rlmF	P36979	rlmN
P75864	rlmL	P36979	rlmN
P27830	rffG	P37760	rfbD
P0A7Z4	rpoA	P0A800	rpoZ
P75817	rlmC	P55135	rlmD
P36999	rlmA	P55135	rlmD
P75782	rlmF	P55135	rlmD
P75864	rlmL	P55135	rlmD
P36979	rlmN	P55135	rlmD
P0AA37	rluA	P37765	rluB
P33643	rluD	P37765	rluB
P27830	rffG	P61887	rffH
P37760	rfbD	P61887	rffH
P76104	rlhA	P0A7Y0	rnc
P0AA37	rluA	P0A7Y0	rnc
P0A9J0		P0A7Y0	rnc
P75817	rlmC	P37634	rlmJ
P36999	rlmA	P37634	rlmJ
P75782	rlmF	P37634	rlmJ
P75864	rlmL	P37634	rlmJ
P36979	rlmN	P37634	rlmJ
P55135	rlmD	P37634	rlmJ
P63177	rlmB	P0ADR6	rlmM
P0C0R7	rlmE	P0ADR6	rlmM
P0AG55	rplF	P0A8T7	rpoC
P0A7N9	rpmG	P0A8T7	rpoC
P0A7Z4	rpoA	P0A8T7	rpoC
P36979	rlmN	P0A8T7	rpoC
P0A800	rpoZ	P0A8T7	rpoC
P0AG55	rplF	P0C018	rplR
P0A7R1	rplI	P0C018	rplR
P60422	rplB	P0C018	rplR
P60438	rplC	P0C018	rplR
P62399	rplE	P0C018	rplR
P0A7L3	rplT	P0C018	rplR
Q2EEQ2	ykgO	P0C018	rplR
P0A7Q6	rpmJ	P0C018	rplR
P0ADY7	rplP	P0C018	rplR
P0AG48	rplU	P0C018	rplR
P0A7N4	rpmF	P0C018	rplR
P0A7N9	rpmG	P0C018	rplR
P0A7P5	rpmH	P0C018	rplR
P0A7Q1	rpmI	P0C018	rplR
P0A7L8	rpmA	P0C018	rplR
P0A7R5	rpsJ	P0C018	rplR
P0AG55	rplF	P0A7K2	rplL
P0A7R1	rplI	P0A7K2	rplL
P60422	rplB	P0A7K2	rplL
P60438	rplC	P0A7K2	rplL
P62399	rplE	P0A7K2	rplL
P0A7L3	rplT	P0A7K2	rplL
Q2EEQ2	ykgO	P0A7K2	rplL
P0A7Q6	rpmJ	P0A7K2	rplL
P0ADY7	rplP	P0A7K2	rplL
P0AG48	rplU	P0A7K2	rplL
P0A7N4	rpmF	P0A7K2	rplL
P0A7N9	rpmG	P0A7K2	rplL
P0A7P5	rpmH	P0A7K2	rplL
P0A7Q1	rpmI	P0A7K2	rplL
P0A7L8	rpmA	P0A7K2	rplL
P0A7R5	rpsJ	P0A7K2	rplL
P0C018	rplR	P0A7K2	rplL
P75817	rlmC	P42596	rlmG
P36999	rlmA	P42596	rlmG
P75782	rlmF	P42596	rlmG
P75864	rlmL	P42596	rlmG
P36979	rlmN	P42596	rlmG
P55135	rlmD	P42596	rlmG
P37634	rlmJ	P42596	rlmG
P75817	rlmC	P75876	rlmI
P36999	rlmA	P75876	rlmI
P75782	rlmF	P75876	rlmI
P75864	rlmL	P75876	rlmI
P36979	rlmN	P75876	rlmI
P55135	rlmD	P75876	rlmI
P37634	rlmJ	P75876	rlmI
P42596	rlmG	P75876	rlmI
P0AA37	rluA	P75966	rluE
P33643	rluD	P75966	rluE
P37765	rluB	P75966	rluE
P0AG55	rplF	P60624	rplX
P0A7R1	rplI	P60624	rplX
P0C0R7	rlmE	P60624	rplX
P60422	rplB	P60624	rplX
P60438	rplC	P60624	rplX
P62399	rplE	P60624	rplX
P0A7L3	rplT	P60624	rplX
Q2EEQ2	ykgO	P60624	rplX
P0A7Q6	rpmJ	P60624	rplX
P0ADY7	rplP	P60624	rplX
P0AG48	rplU	P60624	rplX
P0A7N4	rpmF	P60624	rplX
P0A7N9	rpmG	P60624	rplX
P0A7P5	rpmH	P60624	rplX
P0A7Q1	rpmI	P60624	rplX
P0A7L8	rpmA	P60624	rplX
P0A7R5	rpsJ	P60624	rplX
P33643	rluD	P60624	rplX
P0C018	rplR	P60624	rplX
P0A7K2	rplL	P60624	rplX
P0AA37	rluA	P32684	rluF
P33643	rluD	P32684	rluF
P37765	rluB	P32684	rluF
P75966	rluE	P32684	rluF
P27830	rffG	P37759	rfbB
P37760	rfbD	P37759	rfbB
P61887	rffH	P37759	rfbB
P0A7Y0	rnc	P0A7Y8	rnpA
P0AA37	rluA	P21513	rne
P10442	rnhB	P21513	rne
P52129	rnlA	P21513	rne
P0A7Y0	rnc	P21513	rne
P76104	rlhA	P0CG19	rph
P0AA37	rluA	P0CG19	rph
P0A9J0		P0CG19	rph
P0A7Y0	rnc	P0CG19	rph
P21513	rne	P0CG19	rph
P0AG55	rplF	P68919	rplY
P0A7R1	rplI	P68919	rplY
P0C0R7	rlmE	P68919	rplY
P60422	rplB	P68919	rplY
P60438	rplC	P68919	rplY
P62399	rplE	P68919	rplY
P0A7L3	rplT	P68919	rplY
Q2EEQ2	ykgO	P68919	rplY
P0A7Q6	rpmJ	P68919	rplY
P0ADY7	rplP	P68919	rplY
P0AG48	rplU	P68919	rplY
P0A7N4	rpmF	P68919	rplY
P0A7N9	rpmG	P68919	rplY
P0A7P5	rpmH	P68919	rplY
P0A7Q1	rpmI	P68919	rplY
P0A7L8	rpmA	P68919	rplY
P0A7R5	rpsJ	P68919	rplY
P33643	rluD	P68919	rplY
P0C018	rplR	P68919	rplY
P0A7K2	rplL	P68919	rplY
P60624	rplX	P68919	rplY
P0AG55	rplF	P0A7L0	rplA
P0A7R1	rplI	P0A7L0	rplA
P0C0R7	rlmE	P0A7L0	rplA
P60422	rplB	P0A7L0	rplA
P60438	rplC	P0A7L0	rplA
P62399	rplE	P0A7L0	rplA
P0A7L3	rplT	P0A7L0	rplA
Q2EEQ2	ykgO	P0A7L0	rplA
P0A7Q6	rpmJ	P0A7L0	rplA
P0ADY7	rplP	P0A7L0	rplA
P0AG48	rplU	P0A7L0	rplA
P0A7N4	rpmF	P0A7L0	rplA
P0A7N9	rpmG	P0A7L0	rplA
P0A7P5	rpmH	P0A7L0	rplA
P0A7Q1	rpmI	P0A7L0	rplA
P0A7L8	rpmA	P0A7L0	rplA
P0A7R5	rpsJ	P0A7L0	rplA
P33643	rluD	P0A7L0	rplA
P0C018	rplR	P0A7L0	rplA
P0A7K2	rplL	P0A7L0	rplA
P60624	rplX	P0A7L0	rplA
P68919	rplY	P0A7L0	rplA
P0AG55	rplF	P0A7J3	rplJ
P0A7R1	rplI	P0A7J3	rplJ
P60422	rplB	P0A7J3	rplJ
P60438	rplC	P0A7J3	rplJ
P62399	rplE	P0A7J3	rplJ
P0A7L3	rplT	P0A7J3	rplJ
Q2EEQ2	ykgO	P0A7J3	rplJ
P0A7Q6	rpmJ	P0A7J3	rplJ
P0ADY7	rplP	P0A7J3	rplJ
P0AG48	rplU	P0A7J3	rplJ
P0A7N4	rpmF	P0A7J3	rplJ
P0A7N9	rpmG	P0A7J3	rplJ
P0A7P5	rpmH	P0A7J3	rplJ
P0A7Q1	rpmI	P0A7J3	rplJ
P0A7L8	rpmA	P0A7J3	rplJ
P0A7R5	rpsJ	P0A7J3	rplJ
P0C018	rplR	P0A7J3	rplJ
P0A7K2	rplL	P0A7J3	rplJ
P60624	rplX	P0A7J3	rplJ
P68919	rplY	P0A7J3	rplJ
P0A7L0	rplA	P0A7J3	rplJ
P0AG55	rplF	P37746	rfbX
P0A7N9	rpmG	P37746	rfbX
P36979	rlmN	P37746	rfbX
P37760	rfbD	P37746	rfbX
P0A8T7	rpoC	P37746	rfbX
P37759	rfbB	P37746	rfbX
P0A7Z4	rpoA	P0AG30	rho
P0A800	rpoZ	P0AG30	rho
P0A8T7	rpoC	P0AG30	rho
P0AG55	rplF	P0AA10	rplM
P0A7R1	rplI	P0AA10	rplM
P60422	rplB	P0AA10	rplM
P60438	rplC	P0AA10	rplM
P62399	rplE	P0AA10	rplM
P0A7L3	rplT	P0AA10	rplM
Q2EEQ2	ykgO	P0AA10	rplM
P0A7Q6	rpmJ	P0AA10	rplM
P0ADY7	rplP	P0AA10	rplM
P0AG48	rplU	P0AA10	rplM
P0A7N4	rpmF	P0AA10	rplM
P0A7N9	rpmG	P0AA10	rplM
P0A7P5	rpmH	P0AA10	rplM
P0A7Q1	rpmI	P0AA10	rplM
P0A7L8	rpmA	P0AA10	rplM
P0A7R5	rpsJ	P0AA10	rplM
P0C018	rplR	P0AA10	rplM
P0A7K2	rplL	P0AA10	rplM
P60624	rplX	P0AA10	rplM
P68919	rplY	P0AA10	rplM
P0A7L0	rplA	P0AA10	rplM
P0A7J3	rplJ	P0AA10	rplM
P0AG55	rplF	P0ADY3	rplN
P0A7R1	rplI	P0ADY3	rplN
P60422	rplB	P0ADY3	rplN
P60438	rplC	P0ADY3	rplN
P62399	rplE	P0ADY3	rplN
P0A7L3	rplT	P0ADY3	rplN
Q2EEQ2	ykgO	P0ADY3	rplN
P0A7Q6	rpmJ	P0ADY3	rplN
P0ADY7	rplP	P0ADY3	rplN
P0AG48	rplU	P0ADY3	rplN
P0A7N4	rpmF	P0ADY3	rplN
P0A7N9	rpmG	P0ADY3	rplN
P0A7P5	rpmH	P0ADY3	rplN
P0A7Q1	rpmI	P0ADY3	rplN
P0A7L8	rpmA	P0ADY3	rplN
P0A7R5	rpsJ	P0ADY3	rplN
P0C018	rplR	P0ADY3	rplN
P0A7K2	rplL	P0ADY3	rplN
P60624	rplX	P0ADY3	rplN
P68919	rplY	P0ADY3	rplN
P0A7L0	rplA	P0ADY3	rplN
P0A7J3	rplJ	P0ADY3	rplN
P0AA10	rplM	P0ADY3	rplN
P0AG55	rplF	P0AG44	rplQ
P0A7R1	rplI	P0AG44	rplQ
P0C0R7	rlmE	P0AG44	rplQ
P60422	rplB	P0AG44	rplQ
P60438	rplC	P0AG44	rplQ
P62399	rplE	P0AG44	rplQ
P0A7L3	rplT	P0AG44	rplQ
Q2EEQ2	ykgO	P0AG44	rplQ
P0A7Q6	rpmJ	P0AG44	rplQ
P0ADY7	rplP	P0AG44	rplQ
P0AG48	rplU	P0AG44	rplQ
P0A7N4	rpmF	P0AG44	rplQ
P0A7N9	rpmG	P0AG44	rplQ
P0A7P5	rpmH	P0AG44	rplQ
P0A7Q1	rpmI	P0AG44	rplQ
P0A7L8	rpmA	P0AG44	rplQ
P0A7R5	rpsJ	P0AG44	rplQ
P33643	rluD	P0AG44	rplQ
P0C018	rplR	P0AG44	rplQ
P0A7K2	rplL	P0AG44	rplQ
P60624	rplX	P0AG44	rplQ
P68919	rplY	P0AG44	rplQ
P0A7L0	rplA	P0AG44	rplQ
P0A7J3	rplJ	P0AG44	rplQ
P0AA10	rplM	P0AG44	rplQ
P0ADY3	rplN	P0AG44	rplQ
P0AG55	rplF	P02413	rplO
P0A7R1	rplI	P02413	rplO
P60422	rplB	P02413	rplO
P60438	rplC	P02413	rplO
P62399	rplE	P02413	rplO
P0A7L3	rplT	P02413	rplO
Q2EEQ2	ykgO	P02413	rplO
P0A7Q6	rpmJ	P02413	rplO
P0ADY7	rplP	P02413	rplO
P0AG48	rplU	P02413	rplO
P0A7N4	rpmF	P02413	rplO
P0A7N9	rpmG	P02413	rplO
P0A7P5	rpmH	P02413	rplO
P0A7Q1	rpmI	P02413	rplO
P0A7L8	rpmA	P02413	rplO
P0A7R5	rpsJ	P02413	rplO
P0C018	rplR	P02413	rplO
P0A7K2	rplL	P02413	rplO
P60624	rplX	P02413	rplO
P68919	rplY	P02413	rplO
P0A7L0	rplA	P02413	rplO
P0A7J3	rplJ	P02413	rplO
P0AA10	rplM	P02413	rplO
P0ADY3	rplN	P02413	rplO
P0AG44	rplQ	P02413	rplO
P0AG55	rplF	P0A7M2	rpmB
P0A7R1	rplI	P0A7M2	rpmB
P0C0R7	rlmE	P0A7M2	rpmB
P60422	rplB	P0A7M2	rpmB
P60438	rplC	P0A7M2	rpmB
P62399	rplE	P0A7M2	rpmB
P0A7L3	rplT	P0A7M2	rpmB
Q2EEQ2	ykgO	P0A7M2	rpmB
P0A7Q6	rpmJ	P0A7M2	rpmB
P0ADY7	rplP	P0A7M2	rpmB
P0AG48	rplU	P0A7M2	rpmB
P0A7N4	rpmF	P0A7M2	rpmB
P0A7N9	rpmG	P0A7M2	rpmB
P0A7P5	rpmH	P0A7M2	rpmB
P0A7Q1	rpmI	P0A7M2	rpmB
P0A7L8	rpmA	P0A7M2	rpmB
P0A7R5	rpsJ	P0A7M2	rpmB
P33643	rluD	P0A7M2	rpmB
P0C018	rplR	P0A7M2	rpmB
P0A7K2	rplL	P0A7M2	rpmB
P60624	rplX	P0A7M2	rpmB
P68919	rplY	P0A7M2	rpmB
P0A7L0	rplA	P0A7M2	rpmB
P0A7J3	rplJ	P0A7M2	rpmB
P0AA10	rplM	P0A7M2	rpmB
P0ADY3	rplN	P0A7M2	rpmB
P0AG44	rplQ	P0A7M2	rpmB
P02413	rplO	P0A7M2	rpmB
P0AG55	rplF	P0A7N1	ykgM
P0A7R1	rplI	P0A7N1	ykgM
P60422	rplB	P0A7N1	ykgM
P60438	rplC	P0A7N1	ykgM
P62399	rplE	P0A7N1	ykgM
P0A7L3	rplT	P0A7N1	ykgM
Q2EEQ2	ykgO	P0A7N1	ykgM
P0A7Q6	rpmJ	P0A7N1	ykgM
P0ADY7	rplP	P0A7N1	ykgM
P0AG48	rplU	P0A7N1	ykgM
P0A7N4	rpmF	P0A7N1	ykgM
P0A7N9	rpmG	P0A7N1	ykgM
P0A7P5	rpmH	P0A7N1	ykgM
P0A7Q1	rpmI	P0A7N1	ykgM
P0A7L8	rpmA	P0A7N1	ykgM
P0A7R5	rpsJ	P0A7N1	ykgM
P0C018	rplR	P0A7N1	ykgM
P0A7K2	rplL	P0A7N1	ykgM
P60624	rplX	P0A7N1	ykgM
P68919	rplY	P0A7N1	ykgM
P0A7L0	rplA	P0A7N1	ykgM
P0A7J3	rplJ	P0A7N1	ykgM
P0AA10	rplM	P0A7N1	ykgM
P0ADY3	rplN	P0A7N1	ykgM
P0AG44	rplQ	P0A7N1	ykgM
P02413	rplO	P0A7N1	ykgM
P0A7M2	rpmB	P0A7N1	ykgM
P0AG07	rpe	P37351	rpiB
P30176	ybiA	P0ACS7	rpiR
P0AG55	rplF	P0A7M9	rpmE
P0A7R1	rplI	P0A7M9	rpmE
P60422	rplB	P0A7M9	rpmE
P60438	rplC	P0A7M9	rpmE
P62399	rplE	P0A7M9	rpmE
P0A7L3	rplT	P0A7M9	rpmE
Q2EEQ2	ykgO	P0A7M9	rpmE
P0A7Q6	rpmJ	P0A7M9	rpmE
P0ADY7	rplP	P0A7M9	rpmE
P0AG48	rplU	P0A7M9	rpmE
P0A7N4	rpmF	P0A7M9	rpmE
P0A7N9	rpmG	P0A7M9	rpmE
P0A7P5	rpmH	P0A7M9	rpmE
P0A7Q1	rpmI	P0A7M9	rpmE
P0A7L8	rpmA	P0A7M9	rpmE
P0A7R5	rpsJ	P0A7M9	rpmE
P0C018	rplR	P0A7M9	rpmE
P0A7K2	rplL	P0A7M9	rpmE
P60624	rplX	P0A7M9	rpmE
P68919	rplY	P0A7M9	rpmE
P0A7L0	rplA	P0A7M9	rpmE
P0A7J3	rplJ	P0A7M9	rpmE
P0AA10	rplM	P0A7M9	rpmE
P0ADY3	rplN	P0A7M9	rpmE
P0AG44	rplQ	P0A7M9	rpmE
P02413	rplO	P0A7M9	rpmE
P0A7M2	rpmB	P0A7M9	rpmE
P0A7N1	ykgM	P0A7M9	rpmE
P0AG71	rmuC	P31667	rpnA
P0AG71	rmuC	P31665	rpnC
P31667	rpnA	P31665	rpnC
P0AG55	rplF	P0A7M6	rpmC
P0A7R1	rplI	P0A7M6	rpmC
P0C0R7	rlmE	P0A7M6	rpmC
P60422	rplB	P0A7M6	rpmC
P60438	rplC	P0A7M6	rpmC
P62399	rplE	P0A7M6	rpmC
P0A7L3	rplT	P0A7M6	rpmC
Q2EEQ2	ykgO	P0A7M6	rpmC
P0A7Q6	rpmJ	P0A7M6	rpmC
P0ADY7	rplP	P0A7M6	rpmC
P0AG48	rplU	P0A7M6	rpmC
P0A7N4	rpmF	P0A7M6	rpmC
P0A7N9	rpmG	P0A7M6	rpmC
P0A7P5	rpmH	P0A7M6	rpmC
P0A7Q1	rpmI	P0A7M6	rpmC
P0A7L8	rpmA	P0A7M6	rpmC
P0A7R5	rpsJ	P0A7M6	rpmC
P33643	rluD	P0A7M6	rpmC
P0C018	rplR	P0A7M6	rpmC
P0A7K2	rplL	P0A7M6	rpmC
P60624	rplX	P0A7M6	rpmC
P68919	rplY	P0A7M6	rpmC
P0A7L0	rplA	P0A7M6	rpmC
P0A7J3	rplJ	P0A7M6	rpmC
P0AA10	rplM	P0A7M6	rpmC
P0ADY3	rplN	P0A7M6	rpmC
P0AG44	rplQ	P0A7M6	rpmC
P02413	rplO	P0A7M6	rpmC
P0A7M2	rpmB	P0A7M6	rpmC
P0A7N1	ykgM	P0A7M6	rpmC
P0A7M9	rpmE	P0A7M6	rpmC
P0AG55	rplF	P0AG51	rpmD
P0A7R1	rplI	P0AG51	rpmD
P0C0R7	rlmE	P0AG51	rpmD
P60422	rplB	P0AG51	rpmD
P60438	rplC	P0AG51	rpmD
P62399	rplE	P0AG51	rpmD
P0A7L3	rplT	P0AG51	rpmD
Q2EEQ2	ykgO	P0AG51	rpmD
P0A7Q6	rpmJ	P0AG51	rpmD
P0ADY7	rplP	P0AG51	rpmD
P0AG48	rplU	P0AG51	rpmD
P0A7N4	rpmF	P0AG51	rpmD
P0A7N9	rpmG	P0AG51	rpmD
P0A7P5	rpmH	P0AG51	rpmD
P0A7Q1	rpmI	P0AG51	rpmD
P0A7L8	rpmA	P0AG51	rpmD
P0A7R5	rpsJ	P0AG51	rpmD
P33643	rluD	P0AG51	rpmD
P0C018	rplR	P0AG51	rpmD
P0A7K2	rplL	P0AG51	rpmD
P60624	rplX	P0AG51	rpmD
P68919	rplY	P0AG51	rpmD
P0A7L0	rplA	P0AG51	rpmD
P0A7J3	rplJ	P0AG51	rpmD
P0AA10	rplM	P0AG51	rpmD
P0ADY3	rplN	P0AG51	rpmD
P0AG44	rplQ	P0AG51	rpmD
P02413	rplO	P0AG51	rpmD
P0A7M2	rpmB	P0AG51	rpmD
P0A7N1	ykgM	P0AG51	rpmD
P0A7M9	rpmE	P0AG51	rpmD
P0A7M6	rpmC	P0AG51	rpmD
P0AG71	rmuC	P77768	rpnB
P31667	rpnA	P77768	rpnB
P31665	rpnC	P77768	rpnB
P0AG55	rplF	P60723	rplD
P0A7R1	rplI	P60723	rplD
P60422	rplB	P60723	rplD
P60438	rplC	P60723	rplD
P62399	rplE	P60723	rplD
P0A7L3	rplT	P60723	rplD
Q2EEQ2	ykgO	P60723	rplD
P0A7Q6	rpmJ	P60723	rplD
P0ADY7	rplP	P60723	rplD
P0AG48	rplU	P60723	rplD
P0A7N4	rpmF	P60723	rplD
P0A7N9	rpmG	P60723	rplD
P0A7P5	rpmH	P60723	rplD
P0A7Q1	rpmI	P60723	rplD
P0A7L8	rpmA	P60723	rplD
P0A7R5	rpsJ	P60723	rplD
P36979	rlmN	P60723	rplD
P0A8T7	rpoC	P60723	rplD
P0C018	rplR	P60723	rplD
P0A7K2	rplL	P60723	rplD
P60624	rplX	P60723	rplD
P68919	rplY	P60723	rplD
P0A7L0	rplA	P60723	rplD
P0A7J3	rplJ	P60723	rplD
P37746	rfbX	P60723	rplD
P0AG30	rho	P60723	rplD
P0AA10	rplM	P60723	rplD
P0ADY3	rplN	P60723	rplD
P0AG44	rplQ	P60723	rplD
P02413	rplO	P60723	rplD
P0A7M2	rpmB	P60723	rplD
P0A7N1	ykgM	P60723	rplD
P0ACS7	rpiR	P60723	rplD
P0A7M9	rpmE	P60723	rplD
P0A7M6	rpmC	P60723	rplD
P0AG51	rpmD	P60723	rplD
P0AG55	rplF	P0A8V2	rpoB
P0A7N9	rpmG	P0A8V2	rpoB
P0A7Z4	rpoA	P0A8V2	rpoB
P36979	rlmN	P0A8V2	rpoB
P0A800	rpoZ	P0A8V2	rpoB
P0A8T7	rpoC	P0A8V2	rpoB
P37746	rfbX	P0A8V2	rpoB
P0AG30	rho	P0A8V2	rpoB
P60723	rplD	P0A8V2	rpoB
P0AA37	rluA	P0AA39	rluC
P33643	rluD	P0AA39	rluC
P37765	rluB	P0AA39	rluC
P75966	rluE	P0AA39	rluC
P32684	rluF	P0AA39	rluC
P0AG55	rplF	P37745	rfbC
P0A7N9	rpmG	P37745	rfbC
P27830	rffG	P37745	rfbC
P36979	rlmN	P37745	rfbC
P37760	rfbD	P37745	rfbC
P61887	rffH	P37745	rfbC
P0A8T7	rpoC	P37745	rfbC
P37759	rfbB	P37745	rfbC
P37746	rfbX	P37745	rfbC
P60723	rplD	P37745	rfbC
P0A8V2	rpoB	P37745	rfbC
P0A7R5	rpsJ	P0AFW8	rof
P60723	rplD	P0A8R0	rraA
P52129	rnlA	P0AF90	rraB
P21513	rne	P0AF90	rraB
P0AG55	rplF	P0A7U3	rpsS
P0A7R1	rplI	P0A7U3	rpsS
P60422	rplB	P0A7U3	rpsS
P60438	rplC	P0A7U3	rpsS
P62399	rplE	P0A7U3	rpsS
P0A7L3	rplT	P0A7U3	rpsS
Q2EEQ2	ykgO	P0A7U3	rpsS
P0A7Q6	rpmJ	P0A7U3	rpsS
P0ADY7	rplP	P0A7U3	rpsS
P0AG48	rplU	P0A7U3	rpsS
P0A7N4	rpmF	P0A7U3	rpsS
P0A7N9	rpmG	P0A7U3	rpsS
P0A7P5	rpmH	P0A7U3	rpsS
P0A7Q1	rpmI	P0A7U3	rpsS
P0A7L8	rpmA	P0A7U3	rpsS
P0A7R5	rpsJ	P0A7U3	rpsS
P0C018	rplR	P0A7U3	rpsS
P0A7K2	rplL	P0A7U3	rpsS
P60624	rplX	P0A7U3	rpsS
P68919	rplY	P0A7U3	rpsS
P0A7L0	rplA	P0A7U3	rpsS
P0A7J3	rplJ	P0A7U3	rpsS
P0AA10	rplM	P0A7U3	rpsS
P0ADY3	rplN	P0A7U3	rpsS
P0AG44	rplQ	P0A7U3	rpsS
P02413	rplO	P0A7U3	rpsS
P0A7M2	rpmB	P0A7U3	rpsS
P0A7N1	ykgM	P0A7U3	rpsS
P0A7M9	rpmE	P0A7U3	rpsS
P0A7M6	rpmC	P0A7U3	rpsS
P0AG51	rpmD	P0A7U3	rpsS
P60723	rplD	P0A7U3	rpsS
P0AA37	rluA	P0AA43	rsuA
P33643	rluD	P0AA43	rsuA
P37765	rluB	P0AA43	rsuA
P75966	rluE	P0AA43	rsuA
P32684	rluF	P0AA43	rsuA
P0AA39	rluC	P0AA43	rsuA
P0AG55	rplF	P06992	rsmA
P75817	rlmC	P06992	rsmA
P36999	rlmA	P06992	rsmA
P76104	rlhA	P06992	rsmA
P0AA37	rluA	P06992	rsmA
P0A7N9	rpmG	P06992	rsmA
P75782	rlmF	P06992	rsmA
P75864	rlmL	P06992	rsmA
P0A9J0		P06992	rsmA
P36979	rlmN	P06992	rsmA
P55135	rlmD	P06992	rsmA
P0A7Y0	rnc	P06992	rsmA
P37634	rlmJ	P06992	rsmA
P0A8T7	rpoC	P06992	rsmA
P42596	rlmG	P06992	rsmA
P75876	rlmI	P06992	rsmA
P0CG19	rph	P06992	rsmA
P37746	rfbX	P06992	rsmA
P60723	rplD	P06992	rsmA
P0A8V2	rpoB	P06992	rsmA
P37745	rfbC	P06992	rsmA
P75817	rlmC	P0A6U5	rsmG
P36999	rlmA	P0A6U5	rsmG
P75782	rlmF	P0A6U5	rsmG
P75864	rlmL	P0A6U5	rsmG
P36979	rlmN	P0A6U5	rsmG
P55135	rlmD	P0A6U5	rsmG
P37634	rlmJ	P0A6U5	rsmG
P42596	rlmG	P0A6U5	rsmG
P75876	rlmI	P0A6U5	rsmG
P06992	rsmA	P0A6U5	rsmG
P0AG55	rplF	P02359	rpsG
P0A7R1	rplI	P02359	rpsG
P60422	rplB	P02359	rpsG
P60438	rplC	P02359	rpsG
P62399	rplE	P02359	rpsG
P0A7L3	rplT	P02359	rpsG
Q2EEQ2	ykgO	P02359	rpsG
P0A7Q6	rpmJ	P02359	rpsG
P0ADY7	rplP	P02359	rpsG
P0AG48	rplU	P02359	rpsG
P0A7N4	rpmF	P02359	rpsG
P0A7N9	rpmG	P02359	rpsG
P0A7P5	rpmH	P02359	rpsG
P0A7Q1	rpmI	P02359	rpsG
P0A7L8	rpmA	P02359	rpsG
P0A7R5	rpsJ	P02359	rpsG
P0C018	rplR	P02359	rpsG
P0A7K2	rplL	P02359	rpsG
P60624	rplX	P02359	rpsG
P68919	rplY	P02359	rpsG
P0A7L0	rplA	P02359	rpsG
P0A7J3	rplJ	P02359	rpsG
P0AA10	rplM	P02359	rpsG
P0ADY3	rplN	P02359	rpsG
P0AG44	rplQ	P02359	rpsG
P02413	rplO	P02359	rpsG
P0A7M2	rpmB	P02359	rpsG
P0A7N1	ykgM	P02359	rpsG
P0A7M9	rpmE	P02359	rpsG
P0A7M6	rpmC	P02359	rpsG
P0AG51	rpmD	P02359	rpsG
P60723	rplD	P02359	rpsG
P0A7U3	rpsS	P02359	rpsG
P06992	rsmA	P02359	rpsG
P0AG55	rplF	P0A7W7	rpsH
P0A7R1	rplI	P0A7W7	rpsH
P60422	rplB	P0A7W7	rpsH
P60438	rplC	P0A7W7	rpsH
P62399	rplE	P0A7W7	rpsH
P0A7L3	rplT	P0A7W7	rpsH
Q2EEQ2	ykgO	P0A7W7	rpsH
P0A7Q6	rpmJ	P0A7W7	rpsH
P0ADY7	rplP	P0A7W7	rpsH
P0AG48	rplU	P0A7W7	rpsH
P0A7N4	rpmF	P0A7W7	rpsH
P0A7N9	rpmG	P0A7W7	rpsH
P0A7P5	rpmH	P0A7W7	rpsH
P0A7Q1	rpmI	P0A7W7	rpsH
P0A7L8	rpmA	P0A7W7	rpsH
P0A7R5	rpsJ	P0A7W7	rpsH
P0C018	rplR	P0A7W7	rpsH
P0A7K2	rplL	P0A7W7	rpsH
P60624	rplX	P0A7W7	rpsH
P68919	rplY	P0A7W7	rpsH
P0A7L0	rplA	P0A7W7	rpsH
P0A7J3	rplJ	P0A7W7	rpsH
P0AA10	rplM	P0A7W7	rpsH
P0ADY3	rplN	P0A7W7	rpsH
P0AG44	rplQ	P0A7W7	rpsH
P02413	rplO	P0A7W7	rpsH
P0A7M2	rpmB	P0A7W7	rpsH
P0A7N1	ykgM	P0A7W7	rpsH
P0A7M9	rpmE	P0A7W7	rpsH
P0A7M6	rpmC	P0A7W7	rpsH
P0AG51	rpmD	P0A7W7	rpsH
P60723	rplD	P0A7W7	rpsH
P0A7U3	rpsS	P0A7W7	rpsH
P06992	rsmA	P0A7W7	rpsH
P02359	rpsG	P0A7W7	rpsH
P63177	rlmB	P67087	rsmI
P0C0R7	rlmE	P67087	rsmI
P0ADR6	rlmM	P67087	rsmI
P0A7W7	rpsH	P0DPC7	rseD
P0A7Z4	rpoA	P0ACM2	rspR
P0A800	rpoZ	P0ACM2	rspR
P0A8T7	rpoC	P0ACM2	rspR
P0AG30	rho	P0ACM2	rspR
P0A8V2	rpoB	P0ACM2	rspR
P0A877	trpA	P0A879	trpB
P0AA37	rluA	Q57261	truD
P32684	rluF	Q57261	truD
P0AG71	rmuC	P14294	topB
P31667	rpnA	P14294	topB
P31665	rpnC	P14294	topB
P77768	rpnB	P14294	topB
P0A877	trpA	P00895	trpE
P0A879	trpB	P00895	trpE
P36979	rlmN	P0A873	trmD
P0ACS7	rpiR	P0A881	trpR
P60723	rplD	P0A881	trpR
P52108	rstA	P0A881	trpR
P0A9J0		P0A855	tolB
P0AF67	tsaE	P76256	tsaB
P76104	rlhA	P45748	tsaC
P0AA37	rluA	P45748	tsaC
P0A9J0		P45748	tsaC
P0A7Y0	rnc	P45748	tsaC
P0CG19	rph	P45748	tsaC
P06992	rsmA	P45748	tsaC
P0AF67	tsaE	P45748	tsaC
P76256	tsaB	P45748	tsaC
P52108	rstA	P39453	torS
P33225	torA	P39453	torS
P33225	torA	P33226	torC
P39453	torS	P33226	torC
P52108	rstA	P38684	torR
P0A881	trpR	P38684	torR
P0A877	trpA	P00909	trpC
P0A879	trpB	P00909	trpC
P00895	trpE	P00909	trpC
P05719	hsdS	P08957	hsdM
P0AG55	rplF	P02930	tolC
P0A7N9	rpmG	P02930	tolC
P36979	rlmN	P02930	tolC
P0A8T7	rpoC	P02930	tolC
P37746	rfbX	P02930	tolC
P60723	rplD	P02930	tolC
P0A8V2	rpoB	P02930	tolC
P37745	rfbC	P02930	tolC
P06992	rsmA	P02930	tolC
P0AA37	rluA	P0AA41	truC
P0A7Y0	rnc	P0AA41	truC
P32684	rluF	P0AA41	truC
P21513	rne	P0AA41	truC
P0CG19	rph	P0AA41	truC
Q57261	truD	P0AA41	truC
P0A9J0		P19934	tolA
P0A855	tolB	P19934	tolA
P0A9J0		P0ABU9	tolQ
P0A855	tolB	P0ABU9	tolQ
P19934	tolA	P0ABU9	tolQ
P14294	topB	P06612	topA
P0A9J0		P0ABV6	tolR
P0A855	tolB	P0ABV6	tolR
P19934	tolA	P0ABV6	tolR
P0ABU9	tolQ	P0ABV6	tolR
P0A855	tolB	P02929	tonB
P0ABV6	tolR	P02929	tonB
P05719	hsdS	P08956	hsdR
P08957	hsdM	P08956	hsdR
P0A7W7	rpsH	P62395	secM
P0DPC7	rseD	P62395	secM
P0A855	tolB	P0AG90	secD
P0ABV6	tolR	P0AG90	secD
P02929	tonB	P0AG90	secD
P0AGA2	secY	P0AG90	secD
P75817	rlmC	P76273	rsmF
P36999	rlmA	P76273	rsmF
P75782	rlmF	P76273	rsmF
P75864	rlmL	P76273	rsmF
P36979	rlmN	P76273	rsmF
P55135	rlmD	P76273	rsmF
P37634	rlmJ	P76273	rsmF
P42596	rlmG	P76273	rsmF
P75876	rlmI	P76273	rsmF
P06992	rsmA	P76273	rsmF
P0A6U5	rsmG	P76273	rsmF
P0A766	rsxA	P76182	rsxD
P52108	rstA	P0AEV1	rssB
P39453	torS	P0AEV1	rssB
P39453	torS	P18392	rstB
P75817	rlmC	P60390	rsmH
P36999	rlmA	P60390	rsmH
P75782	rlmF	P60390	rsmH
P75864	rlmL	P60390	rsmH
P36979	rlmN	P60390	rsmH
P55135	rlmD	P60390	rsmH
P37634	rlmJ	P60390	rsmH
P42596	rlmG	P60390	rsmH
P75876	rlmI	P60390	rsmH
P06992	rsmA	P60390	rsmH
P0A6U5	rsmG	P60390	rsmH
P76273	rsmF	P60390	rsmH
P52108	rstA	P0AFX4	rsd
P0A881	trpR	P0AFX4	rsd
P38684	torR	P0AFX4	rsd
P0A7Y0	rnc	P46850	rtcB
P0A7Y8	rnpA	P46850	rtcB
P37746	rfbX	P46850	rtcB
P37745	rfbC	P46850	rtcB
P75817	rlmC	P0ADX9	rsmD
P36999	rlmA	P0ADX9	rsmD
P75782	rlmF	P0ADX9	rsmD
P75864	rlmL	P0ADX9	rsmD
P36979	rlmN	P0ADX9	rsmD
P55135	rlmD	P0ADX9	rsmD
P37634	rlmJ	P0ADX9	rsmD
P42596	rlmG	P0ADX9	rsmD
P75876	rlmI	P0ADX9	rsmD
P06992	rsmA	P0ADX9	rsmD
P0A6U5	rsmG	P0ADX9	rsmD
P76273	rsmF	P0ADX9	rsmD
P60390	rsmH	P0ADX9	rsmD
P75817	rlmC	P0AGL7	rsmE
P36999	rlmA	P0AGL7	rsmE
P75782	rlmF	P0AGL7	rsmE
P75864	rlmL	P0AGL7	rsmE
P36979	rlmN	P0AGL7	rsmE
P55135	rlmD	P0AGL7	rsmE
P37634	rlmJ	P0AGL7	rsmE
P42596	rlmG	P0AGL7	rsmE
P75876	rlmI	P0AGL7	rsmE
P06992	rsmA	P0AGL7	rsmE
P0A6U5	rsmG	P0AGL7	rsmE
P76273	rsmF	P0AGL7	rsmE
P60390	rsmH	P0AGL7	rsmE
P0ADX9	rsmD	P0AGL7	rsmE
P52108	rstA	P38035	rtcR
P39453	torS	P38035	rtcR
P0AEV1	rssB	P38035	rtcR
P75893	rutF	P75898	rutA
P37746	rfbX	P75894	rutE
P37745	rfbC	P75894	rutE
P46850	rtcB	P75894	rutE
P75893	rutF	P75894	rutE
P75898	rutA	P75894	rutE
P75893	rutF	P75895	rutD
P75898	rutA	P75895	rutD
P75894	rutE	P75895	rutD
P0A7N4	rpmF	P0A809	ruvA
P21513	rne	P0A809	ruvA
P68919	rplY	P0A809	ruvA
P0A9J0		P0ABG7	mrdB
P10100	rlpA	P0ABG7	mrdB
P0A855	tolB	P0ABG7	mrdB
P19934	tolA	P0ABG7	mrdB
P0ABU9	tolQ	P0ABG7	mrdB
P0ABV6	tolR	P0ABG7	mrdB
P0A870	talB	P0A7Z0	rpiA
P0A858	tpiA	P42630	tdcG
P38104	rspA	P42630	tdcG
P0AGL2	tdcF	P42630	tdcG
P38035	rtcR	P11866	tdcR
P52108	rstA	P0A9E2	soxS
P0A881	trpR	P0A9E2	soxS
P38684	torR	P0A9E2	soxS
P0AFX4	rsd	P0A9E2	soxS
P0AG55	rplF	P25396	tehA
P0A7N9	rpmG	P25396	tehA
P36979	rlmN	P25396	tehA
P0A8T7	rpoC	P25396	tehA
P37746	rfbX	P25396	tehA
P60723	rplD	P25396	tehA
P0A8V2	rpoB	P25396	tehA
P37745	rfbC	P25396	tehA
P06992	rsmA	P25396	tehA
P02930	tolC	P25396	tehA
P76182	rsxD	P25396	tehA
P76182	rsxD	P75851	ssuC
P25396	tehA	P75851	ssuC
P75851	ssuC	P0AG78	sbp
P39453	torS	P0AGE9	sucD
P18392	rstB	P0AGE9	sucD
P0A7N4	rpmF	P77499	sufC
P68919	rplY	P77499	sufC
P0A809	ruvA	P77499	sufC
P46187	rseC	P76194	sufE
P77499	sufC	P76194	sufE
P0AG55	rplF	P25397	tehB
P0A7N9	rpmG	P25397	tehB
P36979	rlmN	P25397	tehB
P0A8T7	rpoC	P25397	tehB
P37746	rfbX	P25397	tehB
P60723	rplD	P25397	tehB
P0A8V2	rpoB	P25397	tehB
P37745	rfbC	P25397	tehB
P06992	rsmA	P25397	tehB
P02930	tolC	P25397	tehB
P25396	tehA	P25397	tehB
P32141	yihT	P0A9V8	yihU
P32141	yihT	P32143	yihV
P0A9V8	yihU	P32143	yihV
P0AG55	rplF	P21507	srmB
P0C0R7	rlmE	P21507	srmB
P60422	rplB	P21507	srmB
P60438	rplC	P21507	srmB
P62399	rplE	P21507	srmB
P0A7L3	rplT	P21507	srmB
P0ADY7	rplP	P21507	srmB
P0A7N4	rpmF	P21507	srmB
P0A7N9	rpmG	P21507	srmB
P0A7L8	rpmA	P21507	srmB
P33643	rluD	P21507	srmB
P60624	rplX	P21507	srmB
P68919	rplY	P21507	srmB
P0A7L0	rplA	P21507	srmB
P0AG44	rplQ	P21507	srmB
P0A7M2	rpmB	P21507	srmB
P0A7M6	rpmC	P21507	srmB
P0AG51	rpmD	P21507	srmB
P38035	rtcR	P0ACA3	sspA
P11866	tdcR	P0ACA3	sspA
P75851	ssuC	P75853	ssuA
P0AG78	sbp	P75853	ssuA
P0ACS7	rpiR	P07604	tyrR
P60723	rplD	P07604	tyrR
P52108	rstA	P07604	tyrR
P0A881	trpR	P07604	tyrR
P39453	torS	P07604	tyrR
P38684	torR	P07604	tyrR
P0AEV1	rssB	P07604	tyrR
P0AFX4	rsd	P07604	tyrR
P38035	rtcR	P07604	tyrR
P0A9E2	soxS	P07604	tyrR
P26602	ubiC	P0AGK1	ubiA
P0A7N4	rpmF	P0A884	thyA
P68919	rplY	P0A884	thyA
P0A7W7	rpsH	P0A884	thyA
P0DPC7	rseD	P0A884	thyA
P62395	secM	P0A884	thyA
P0A809	ruvA	P0A884	thyA
P77499	sufC	P0A884	thyA
P37746	rfbX	P07650	deoA
P37745	rfbC	P07650	deoA
P46850	rtcB	P07650	deoA
P75894	rutE	P07650	deoA
P37746	rfbX	P76657	yqiJ
P37745	rfbC	P76657	yqiJ
P46850	rtcB	P76657	yqiJ
P75894	rutE	P76657	yqiJ
P07650	deoA	P76657	yqiJ
P37746	rfbX	P64588	yqjI
P0ACS7	rpiR	P64588	yqjI
P60723	rplD	P64588	yqjI
P37745	rfbC	P64588	yqjI
P0A881	trpR	P64588	yqjI
P46850	rtcB	P64588	yqjI
P38035	rtcR	P64588	yqjI
P75894	rutE	P64588	yqjI
P11866	tdcR	P64588	yqjI
P0ACA3	sspA	P64588	yqjI
P07604	tyrR	P64588	yqjI
P07650	deoA	P64588	yqjI
P76657	yqiJ	P64588	yqjI
P14294	topB	P45771	yrdD
P06612	topA	P45771	yrdD
P0A7J3	rplJ	Q46948	yajL
P0A862	tpx	Q46948	yajL
P46850	rtcB	Q46948	yajL
P0A7Z4	rpoA	P30864	yafC
P0A800	rpoZ	P30864	yafC
P0A8T7	rpoC	P30864	yafC
P0AG30	rho	P30864	yafC
P0A8V2	rpoB	P30864	yafC
P0ACM2	rspR	P30864	yafC
P52108	rstA	P0A8H8	yacG
P0A881	trpR	P0A8H8	yacG
P38684	torR	P0A8H8	yacG
P0AFX4	rsd	P0A8H8	yacG
P0A9E2	soxS	P0A8H8	yacG
P07604	tyrR	P0A8H8	yacG
P0A7Z4	rpoA	P67660	yhaJ
P0A800	rpoZ	P67660	yhaJ
P0A8T7	rpoC	P67660	yhaJ
P0AG30	rho	P67660	yhaJ
P0A8V2	rpoB	P67660	yhaJ
P0ACM2	rspR	P67660	yhaJ
P30864	yafC	P67660	yhaJ
P0A9J0		P39310	ytfB
P0A855	tolB	P39310	ytfB
P19934	tolA	P39310	ytfB
P0ABU9	tolQ	P39310	ytfB
P0ABV6	tolR	P39310	ytfB
P0ABG7	mrdB	P39310	ytfB
P46187	rseC	P31679	yaaU
P76194	sufE	P31679	yaaU
P46187	rseC	P69506	ytfE
P76194	sufE	P69506	ytfE
Q46948	yajL	P69506	ytfE
P31679	yaaU	P69506	ytfE
P75817	rlmC	P0A8I8	rlmH
P36999	rlmA	P0A8I8	rlmH
P75782	rlmF	P0A8I8	rlmH
P75864	rlmL	P0A8I8	rlmH
P36979	rlmN	P0A8I8	rlmH
P55135	rlmD	P0A8I8	rlmH
P37634	rlmJ	P0A8I8	rlmH
P42596	rlmG	P0A8I8	rlmH
P75876	rlmI	P0A8I8	rlmH
P06992	rsmA	P0A8I8	rlmH
P0A6U5	rsmG	P0A8I8	rlmH
P76273	rsmF	P0A8I8	rlmH
P60390	rsmH	P0A8I8	rlmH
P0ADX9	rsmD	P0A8I8	rlmH
P0AGL7	rsmE	P0A8I8	rlmH
P27830	rffG	P37744	rfbA
P37760	rfbD	P37744	rfbA
P61887	rffH	P37744	rfbA
P37759	rfbB	P37744	rfbA
P37746	rfbX	P37744	rfbA
P37745	rfbC	P37744	rfbA
P0AG55	rplF	P0ADZ0	rplW
P0A7R1	rplI	P0ADZ0	rplW
P0C0R7	rlmE	P0ADZ0	rplW
P60422	rplB	P0ADZ0	rplW
P60438	rplC	P0ADZ0	rplW
P62399	rplE	P0ADZ0	rplW
P0A7L3	rplT	P0ADZ0	rplW
Q2EEQ2	ykgO	P0ADZ0	rplW
P0A7Q6	rpmJ	P0ADZ0	rplW
P0ADY7	rplP	P0ADZ0	rplW
P0AG48	rplU	P0ADZ0	rplW
P0A7N4	rpmF	P0ADZ0	rplW
P0A7N9	rpmG	P0ADZ0	rplW
P0A7P5	rpmH	P0ADZ0	rplW
P0A7Q1	rpmI	P0ADZ0	rplW
P0A7L8	rpmA	P0ADZ0	rplW
P0A7R5	rpsJ	P0ADZ0	rplW
P33643	rluD	P0ADZ0	rplW
P0C018	rplR	P0ADZ0	rplW
P0A7K2	rplL	P0ADZ0	rplW
P60624	rplX	P0ADZ0	rplW
P68919	rplY	P0ADZ0	rplW
P0A7L0	rplA	P0ADZ0	rplW
P0A7J3	rplJ	P0ADZ0	rplW
P0AA10	rplM	P0ADZ0	rplW
P0ADY3	rplN	P0ADZ0	rplW
P0AG44	rplQ	P0ADZ0	rplW
P02413	rplO	P0ADZ0	rplW
P0A7M2	rpmB	P0ADZ0	rplW
P0A7N1	ykgM	P0ADZ0	rplW
P0A7M9	rpmE	P0ADZ0	rplW
P0A7M6	rpmC	P0ADZ0	rplW
P0AG51	rpmD	P0ADZ0	rplW
P60723	rplD	P0ADZ0	rplW
P0A7U3	rpsS	P0ADZ0	rplW
P02359	rpsG	P0ADZ0	rplW
P0A7W7	rpsH	P0ADZ0	rplW
P21507	srmB	P0ADZ0	rplW
P52129	rnlA	P30850	rnb
P21513	rne	P30850	rnb
P0AF90	rraB	P30850	rnb
P60723	rplD	P52130	rnlB
P0A8R0	rraA	P52130	rnlB
P10442	rnhB	P21338	rna
P21513	rne	P21338	rna
P24255	rpoN	P0AGB6	rpoE
P52108	rstA	P0AGB6	rpoE
P0A881	trpR	P0AGB6	rpoE
P38684	torR	P0AGB6	rpoE
P0AFX4	rsd	P0AGB6	rpoE
P0A9E2	soxS	P0AGB6	rpoE
P07604	tyrR	P0AGB6	rpoE
P0A8H8	yacG	P0AGB6	rpoE
P52129	rnlA	P21499	rnr
P21513	rne	P21499	rnr
P0AF90	rraB	P21499	rnr
P30850	rnb	P21499	rnr
Q46948	yajL	P00579	rpoD
P00579	rpoD	P13445	rpoS
P0ABG7	mrdB	P27434	rodZ
P0A7Z4	rpoA	P0AGB3	rpoH
P0A800	rpoZ	P0AGB3	rpoH
P0A8T7	rpoC	P0AGB3	rpoH
P0AG71	rmuC	P0AGB3	rpoH
P0AG30	rho	P0AGB3	rpoH
P31667	rpnA	P0AGB3	rpoH
P31665	rpnC	P0AGB3	rpoH
P77768	rpnB	P0AGB3	rpoH
P0A8V2	rpoB	P0AGB3	rpoH
P52108	rstA	P0AGB3	rpoH
P0ACM2	rspR	P0AGB3	rpoH
P14294	topB	P0AGB3	rpoH
P0A881	trpR	P0AGB3	rpoH
P38684	torR	P0AGB3	rpoH
P0AEV1	rssB	P0AGB3	rpoH
P0AFX4	rsd	P0AGB3	rpoH
P0A9E2	soxS	P0AGB3	rpoH
P07604	tyrR	P0AGB3	rpoH
Q46948	yajL	P0AGB3	rpoH
P30864	yafC	P0AGB3	rpoH
P0A8H8	yacG	P0AGB3	rpoH
P67660	yhaJ	P0AGB3	rpoH
P0AGB6	rpoE	P0AGB3	rpoH
P00579	rpoD	P0AGB3	rpoH
P13445	rpoS	P0AGB3	rpoH
P0AA37	rluA	P30014	rnt
P0A7Y0	rnc	P30014	rnt
P21513	rne	P30014	rnt
P0CG19	rph	P30014	rnt
P0AA41	truC	P30014	rnt
P0AG55	rplF	P0AG67	rpsA
P0A7R1	rplI	P0AG67	rpsA
P60422	rplB	P0AG67	rpsA
P60438	rplC	P0AG67	rpsA
P62399	rplE	P0AG67	rpsA
P0A7L3	rplT	P0AG67	rpsA
Q2EEQ2	ykgO	P0AG67	rpsA
P0A7Q6	rpmJ	P0AG67	rpsA
P0ADY7	rplP	P0AG67	rpsA
P0AG48	rplU	P0AG67	rpsA
P0A7N4	rpmF	P0AG67	rpsA
P0A7N9	rpmG	P0AG67	rpsA
P0A7P5	rpmH	P0AG67	rpsA
P0A7Q1	rpmI	P0AG67	rpsA
P0A7L8	rpmA	P0AG67	rpsA
P0A7R5	rpsJ	P0AG67	rpsA
P0C018	rplR	P0AG67	rpsA
P0A7K2	rplL	P0AG67	rpsA
P60624	rplX	P0AG67	rpsA
P68919	rplY	P0AG67	rpsA
P0A7L0	rplA	P0AG67	rpsA
P0A7J3	rplJ	P0AG67	rpsA
P0AA10	rplM	P0AG67	rpsA
P0ADY3	rplN	P0AG67	rpsA
P0AG44	rplQ	P0AG67	rpsA
P02413	rplO	P0AG67	rpsA
P0A7M2	rpmB	P0AG67	rpsA
P0A7N1	ykgM	P0AG67	rpsA
P0A7M9	rpmE	P0AG67	rpsA
P0A7M6	rpmC	P0AG67	rpsA
P0AG51	rpmD	P0AG67	rpsA
P60723	rplD	P0AG67	rpsA
P0A7U3	rpsS	P0AG67	rpsA
P06992	rsmA	P0AG67	rpsA
P02359	rpsG	P0AG67	rpsA
P0A7W7	rpsH	P0AG67	rpsA
P0ADZ0	rplW	P0AG67	rpsA
P75817	rlmC	P36929	rsmB
P36999	rlmA	P36929	rsmB
P75782	rlmF	P36929	rsmB
P75864	rlmL	P36929	rsmB
P36979	rlmN	P36929	rsmB
P55135	rlmD	P36929	rsmB
P37634	rlmJ	P36929	rsmB
P42596	rlmG	P36929	rsmB
P75876	rlmI	P36929	rsmB
P52108	rstA	P36929	rsmB
P06992	rsmA	P36929	rsmB
P0A6U5	rsmG	P36929	rsmB
P0A881	trpR	P36929	rsmB
P38684	torR	P36929	rsmB
P76273	rsmF	P36929	rsmB
P60390	rsmH	P36929	rsmB
P0AFX4	rsd	P36929	rsmB
P0ADX9	rsmD	P36929	rsmB
P0AGL7	rsmE	P36929	rsmB
P0A9E2	soxS	P36929	rsmB
P07604	tyrR	P36929	rsmB
P0A8H8	yacG	P36929	rsmB
P0A8I8	rlmH	P36929	rsmB
P0AGB6	rpoE	P36929	rsmB
P0AGB3	rpoH	P36929	rsmB
P0A862	tpx	P77212	rclA
P0A7N4	rpmF	P0A7H3	recO
P0AG71	rmuC	P0A7H3	recO
P68919	rplY	P0A7H3	recO
P31667	rpnA	P0A7H3	recO
P31665	rpnC	P0A7H3	recO
P77768	rpnB	P0A7H3	recO
P14294	topB	P0A7H3	recO
P46850	rtcB	P0A7H3	recO
P0A809	ruvA	P0A7H3	recO
P77499	sufC	P0A7H3	recO
P0A884	thyA	P0A7H3	recO
Q46948	yajL	P0A7H3	recO
P0AGB3	rpoH	P0A7H3	recO
P0A7Z4	rpoA	P0DMC9	rcsA
P0A800	rpoZ	P0DMC9	rcsA
P0A8T7	rpoC	P0DMC9	rcsA
P0AG30	rho	P0DMC9	rcsA
P0A8V2	rpoB	P0DMC9	rcsA
P52108	rstA	P0DMC9	rcsA
P0ACM2	rspR	P0DMC9	rcsA
P0A881	trpR	P0DMC9	rcsA
P38684	torR	P0DMC9	rcsA
P0AFX4	rsd	P0DMC9	rcsA
P0A9E2	soxS	P0DMC9	rcsA
P07604	tyrR	P0DMC9	rcsA
P30864	yafC	P0DMC9	rcsA
P0A8H8	yacG	P0DMC9	rcsA
P67660	yhaJ	P0DMC9	rcsA
P0AGB6	rpoE	P0DMC9	rcsA
P0AGB3	rpoH	P0DMC9	rcsA
P36929	rsmB	P0DMC9	rcsA
P0AG55	rplF	P0DMC7	rcsB
P0A7N9	rpmG	P0DMC7	rcsB
P0A7Z4	rpoA	P0DMC7	rcsB
P36979	rlmN	P0DMC7	rcsB
P0A800	rpoZ	P0DMC7	rcsB
P0A8T7	rpoC	P0DMC7	rcsB
P37746	rfbX	P0DMC7	rcsB
P0AG30	rho	P0DMC7	rcsB
P0ACS7	rpiR	P0DMC7	rcsB
P60723	rplD	P0DMC7	rcsB
P0A8V2	rpoB	P0DMC7	rcsB
P37745	rfbC	P0DMC7	rcsB
P52108	rstA	P0DMC7	rcsB
P06992	rsmA	P0DMC7	rcsB
P0ACM2	rspR	P0DMC7	rcsB
P0A881	trpR	P0DMC7	rcsB
P39453	torS	P0DMC7	rcsB
P02930	tolC	P0DMC7	rcsB
P0AEV1	rssB	P0DMC7	rcsB
P38035	rtcR	P0DMC7	rcsB
P11866	tdcR	P0DMC7	rcsB
P25396	tehA	P0DMC7	rcsB
P25397	tehB	P0DMC7	rcsB
P0ACA3	sspA	P0DMC7	rcsB
P07604	tyrR	P0DMC7	rcsB
P64588	yqjI	P0DMC7	rcsB
P30864	yafC	P0DMC7	rcsB
P67660	yhaJ	P0DMC7	rcsB
P0AGB3	rpoH	P0DMC7	rcsB
P0DMC9	rcsA	P0DMC7	rcsB
P37746	rfbX	P33596	recX
P37745	rfbC	P33596	recX
P46850	rtcB	P33596	recX
P75894	rutE	P33596	recX
P0A809	ruvA	P33596	recX
P07650	deoA	P33596	recX
P76657	yqiJ	P33596	recX
P64588	yqjI	P33596	recX
Q46948	yajL	P33596	recX
P0A7H3	recO	P33596	recX
P07650	deoA	P33022	rihB
P0AG55	rplF	P0A8A8	rimP
P0A7R1	rplI	P0A8A8	rimP
P60422	rplB	P0A8A8	rimP
P60438	rplC	P0A8A8	rimP
P62399	rplE	P0A8A8	rimP
P0A7L3	rplT	P0A8A8	rimP
Q2EEQ2	ykgO	P0A8A8	rimP
P0A7Q6	rpmJ	P0A8A8	rimP
P0ADY7	rplP	P0A8A8	rimP
P0AG48	rplU	P0A8A8	rimP
P0A7N4	rpmF	P0A8A8	rimP
P0A7N9	rpmG	P0A8A8	rimP
P0A7P5	rpmH	P0A8A8	rimP
P0A7Q1	rpmI	P0A8A8	rimP
P0A7L8	rpmA	P0A8A8	rimP
P0A7R5	rpsJ	P0A8A8	rimP
P0C018	rplR	P0A8A8	rimP
P0A7K2	rplL	P0A8A8	rimP
P60624	rplX	P0A8A8	rimP
P68919	rplY	P0A8A8	rimP
P0A7L0	rplA	P0A8A8	rimP
P0A7J3	rplJ	P0A8A8	rimP
P0AA10	rplM	P0A8A8	rimP
P0ADY3	rplN	P0A8A8	rimP
P0AG44	rplQ	P0A8A8	rimP
P02413	rplO	P0A8A8	rimP
P0A7M2	rpmB	P0A8A8	rimP
P0A7N1	ykgM	P0A8A8	rimP
P0A7M9	rpmE	P0A8A8	rimP
P0A7M6	rpmC	P0A8A8	rimP
P0AG51	rpmD	P0A8A8	rimP
P60723	rplD	P0A8A8	rimP
P0A7U3	rpsS	P0A8A8	rimP
P06992	rsmA	P0A8A8	rimP
P02359	rpsG	P0A8A8	rimP
P0A7W7	rpsH	P0A8A8	rimP
P0ADZ0	rplW	P0A8A8	rimP
P0AG67	rpsA	P0A8A8	rimP
P0AG40	ribF	P0A7I7	ribA
P0AG55	rplF	P0C077	relE
P0A7N9	rpmG	P0C077	relE
P52129	rnlA	P0C077	relE
P36979	rlmN	P0C077	relE
P0A8T7	rpoC	P0C077	relE
P21513	rne	P0C077	relE
P68919	rplY	P0C077	relE
P0A7J3	rplJ	P0C077	relE
P37746	rfbX	P0C077	relE
P0AA10	rplM	P0C077	relE
P60723	rplD	P0C077	relE
P0A8V2	rpoB	P0C077	relE
P37745	rfbC	P0C077	relE
P0AF90	rraB	P0C077	relE
P06992	rsmA	P0C077	relE
P02359	rpsG	P0C077	relE
P02930	tolC	P0C077	relE
P25396	tehA	P0C077	relE
P25397	tehB	P0C077	relE
P30850	rnb	P0C077	relE
P21499	rnr	P0C077	relE
P0DMC7	rcsB	P0C077	relE
P0A7Z4	rpoA	P09378	rhaR
P0A800	rpoZ	P09378	rhaR
P0A8T7	rpoC	P09378	rhaR
P0AG30	rho	P09378	rhaR
P0A8V2	rpoB	P09378	rhaR
P0ACM2	rspR	P09378	rhaR
P38035	rtcR	P09378	rhaR
P11866	tdcR	P09378	rhaR
P0ACA3	sspA	P09378	rhaR
P64588	yqjI	P09378	rhaR
P30864	yafC	P09378	rhaR
P67660	yhaJ	P09378	rhaR
P0AGB3	rpoH	P09378	rhaR
P0DMC9	rcsA	P09378	rhaR
P0DMC7	rcsB	P09378	rhaR
P76055	ttcA	P0AEI4	rimO
P0AGE4	sstT	P0AG38	rhtC
P0AG40	ribF	P61714	ribE
P0A7I7	ribA	P61714	ribE
P0A7N4	rpmF	P0A7H6	recR
P0AG71	rmuC	P0A7H6	recR
P68919	rplY	P0A7H6	recR
P31667	rpnA	P0A7H6	recR
P31665	rpnC	P0A7H6	recR
P77768	rpnB	P0A7H6	recR
P37745	rfbC	P0A7H6	recR
P14294	topB	P0A7H6	recR
P0A809	ruvA	P0A7H6	recR
P77499	sufC	P0A7H6	recR
P0A884	thyA	P0A7H6	recR
P0AGB3	rpoH	P0A7H6	recR
P0A7H3	recO	P0A7H6	recR
P0A7N4	rpmF	P05824	recN
P68919	rplY	P05824	recN
P37746	rfbX	P05824	recN
P37745	rfbC	P05824	recN
P46850	rtcB	P05824	recN
P75894	rutE	P05824	recN
P0A809	ruvA	P05824	recN
P77499	sufC	P05824	recN
P0A884	thyA	P05824	recN
P07650	deoA	P05824	recN
P76657	yqiJ	P05824	recN
P64588	yqjI	P05824	recN
P0A7H3	recO	P05824	recN
P33596	recX	P05824	recN
P0A7H6	recR	P05824	recN
P27126	rfaS	P25740	rfaG
P0A7Z4	rpoA	P77732	rhmR
P0A800	rpoZ	P77732	rhmR
P0A8T7	rpoC	P77732	rhmR
P0AG30	rho	P77732	rhmR
P0A8V2	rpoB	P77732	rhmR
P52108	rstA	P77732	rhmR
P0ACM2	rspR	P77732	rhmR
P0A881	trpR	P77732	rhmR
P38684	torR	P77732	rhmR
P0AFX4	rsd	P77732	rhmR
P0A9E2	soxS	P77732	rhmR
P07604	tyrR	P77732	rhmR
P30864	yafC	P77732	rhmR
P0A8H8	yacG	P77732	rhmR
P67660	yhaJ	P77732	rhmR
P0AGB6	rpoE	P77732	rhmR
P0AGB3	rpoH	P77732	rhmR
P36929	rsmB	P77732	rhmR
P0DMC9	rcsA	P77732	rhmR
P0DMC7	rcsB	P77732	rhmR
P09378	rhaR	P77732	rhmR
P39452	nrdE	P69924	nrdB
P0A7R5	rpsJ	Q47274	quuD
P0AFW8	rof	Q47274	quuD
P0AF96	tabA	Q47274	quuD
P27126	rfaS	P27128	rfaI
P25740	rfaG	P27128	rfaI
P32169	rhaD	P32156	rhaM
P37746	rfbX	P22564	rihC
P37745	rfbC	P22564	rihC
P46850	rtcB	P22564	rihC
P75894	rutE	P22564	rihC
P07650	deoA	P22564	rihC
P76657	yqiJ	P22564	rihC
P64588	yqjI	P22564	rihC
P33596	recX	P22564	rihC
P33022	rihB	P22564	rihC
P05824	recN	P22564	rihC
P0A7Z4	rpoA	P52076	qseB
P0A800	rpoZ	P52076	qseB
P0A8T7	rpoC	P52076	qseB
P0AG30	rho	P52076	qseB
P0A8V2	rpoB	P52076	qseB
P52108	rstA	P52076	qseB
P0ACM2	rspR	P52076	qseB
P0A881	trpR	P52076	qseB
P39453	torS	P52076	qseB
P38684	torR	P52076	qseB
P0AEV1	rssB	P52076	qseB
P0AFX4	rsd	P52076	qseB
P38035	rtcR	P52076	qseB
P0A9E2	soxS	P52076	qseB
P07604	tyrR	P52076	qseB
P30864	yafC	P52076	qseB
P0A8H8	yacG	P52076	qseB
P67660	yhaJ	P52076	qseB
P0AGB6	rpoE	P52076	qseB
P0AGB3	rpoH	P52076	qseB
P36929	rsmB	P52076	qseB
P0DMC9	rcsA	P52076	qseB
P0DMC7	rcsB	P52076	qseB
P09378	rhaR	P52076	qseB
P77732	rhmR	P52076	qseB
P0A847	tgt	Q46920	queF
P0A7E5	pyrG	P0A7E9	pyrH
P0A7F3	pyrI	P0A7E9	pyrH
P0AGE9	sucD	P0AFG3	sucA
P0AGE4	sstT	P0AA47	plaP
P0AG38	rhtC	P0AA47	plaP
P0A858	tpiA	P06959	aceF
P39452	nrdE	P27298	prlC
P69924	nrdB	P27298	prlC
P39401	mdoB	P75920	mdoC
P39401	mdoB	P40120	mdoD
P75920	mdoC	P40120	mdoD
P0A855	tolB	P23843	oppA
P0ABV6	tolR	P23843	oppA
P02929	tonB	P23843	oppA
P0AG90	secD	P23843	oppA
P76182	rsxD	P23843	oppA
P25396	tehA	P23843	oppA
P75851	ssuC	P23843	oppA
Q46948	yajL	P23843	oppA
P00579	rpoD	P23843	oppA
P0AGB3	rpoH	P23843	oppA
P0A855	tolB	P0AFH2	oppB
P0ABV6	tolR	P0AFH2	oppB
P02929	tonB	P0AFH2	oppB
P0AG90	secD	P0AFH2	oppB
P76182	rsxD	P0AFH2	oppB
P25396	tehA	P0AFH2	oppB
P75851	ssuC	P0AFH2	oppB
P23843	oppA	P0AFH2	oppB
P0A855	tolB	P0AFH6	oppC
P0ABV6	tolR	P0AFH6	oppC
P02929	tonB	P0AFH6	oppC
P0AG90	secD	P0AFH6	oppC
P76182	rsxD	P0AFH6	oppC
P25396	tehA	P0AFH6	oppC
P75851	ssuC	P0AFH6	oppC
P23843	oppA	P0AFH6	oppC
P0AFH2	oppB	P0AFH6	oppC
P0A855	tolB	P77737	oppF
P0ABV6	tolR	P77737	oppF
P02929	tonB	P77737	oppF
P0AG90	secD	P77737	oppF
P23843	oppA	P77737	oppF
P0AFH2	oppB	P77737	oppF
P0AFH6	oppC	P77737	oppF
P75719	rzpD	P64453	ortT
P0A870	talB	Q46891	otnI
P38035	rtcR	P60240	rapA
P11866	tdcR	P60240	rapA
P0ACA3	sspA	P60240	rapA
P64588	yqjI	P60240	rapA
P0DMC7	rcsB	P60240	rapA
P09378	rhaR	P60240	rapA
P06992	rsmA	P0A7X6	rimM
P02359	rpsG	P0A7X6	rimM
P0A7W7	rpsH	P0A7X6	rimM
P0AG67	rpsA	P0A7X6	rimM
P0A8A8	rimP	P0A7X6	rimM
P0AG55	rplF	P33919	radD
P0A7R1	rplI	P33919	radD
P60422	rplB	P33919	radD
P60438	rplC	P33919	radD
P62399	rplE	P33919	radD
P0A7L3	rplT	P33919	radD
Q2EEQ2	ykgO	P33919	radD
P0A7Q6	rpmJ	P33919	radD
P0ADY7	rplP	P33919	radD
P0AG48	rplU	P33919	radD
P0A7N4	rpmF	P33919	radD
P0A7N9	rpmG	P33919	radD
P0A7P5	rpmH	P33919	radD
P0A7Q1	rpmI	P33919	radD
P0A7L8	rpmA	P33919	radD
P0A7R5	rpsJ	P33919	radD
P0A9J0		P33919	radD
P0C018	rplR	P33919	radD
P0A7K2	rplL	P33919	radD
P60624	rplX	P33919	radD
P68919	rplY	P33919	radD
P0A7L0	rplA	P33919	radD
P0A7J3	rplJ	P33919	radD
P0AA10	rplM	P33919	radD
P0ADY3	rplN	P33919	radD
P0AG44	rplQ	P33919	radD
P02413	rplO	P33919	radD
P0A7M2	rpmB	P33919	radD
P0A7N1	ykgM	P33919	radD
P0A7M9	rpmE	P33919	radD
P0A7M6	rpmC	P33919	radD
P0AG51	rpmD	P33919	radD
P60723	rplD	P33919	radD
P0A7U3	rpsS	P33919	radD
P02359	rpsG	P33919	radD
P0A7W7	rpsH	P33919	radD
P0A855	tolB	P33919	radD
P19934	tolA	P33919	radD
P0ABU9	tolQ	P33919	radD
P0ABV6	tolR	P33919	radD
P0ABG7	mrdB	P33919	radD
P30864	yafC	P33919	radD
P39310	ytfB	P33919	radD
P0ADZ0	rplW	P33919	radD
P0AG67	rpsA	P33919	radD
P0A8A8	rimP	P33919	radD
P05824	recN	P33919	radD
P0AA37	rluA	P39288	queG
P0A7Y0	rnc	P39288	queG
P21513	rne	P39288	queG
P0CG19	rph	P39288	queG
P0AA41	truC	P39288	queG
P0A847	tgt	P39288	queG
P30014	rnt	P39288	queG
Q46920	queF	P39288	queG
P0AG55	rplF	P33230	rcbA
P0A7N9	rpmG	P33230	rcbA
P36979	rlmN	P33230	rcbA
P0A8T7	rpoC	P33230	rcbA
P37746	rfbX	P33230	rcbA
P60723	rplD	P33230	rcbA
P0A8V2	rpoB	P33230	rcbA
P37745	rfbC	P33230	rcbA
P06992	rsmA	P33230	rcbA
P02930	tolC	P33230	rcbA
P25396	tehA	P33230	rcbA
P25397	tehB	P33230	rcbA
P0DMC7	rcsB	P33230	rcbA
P0C077	relE	P33230	rcbA
P0AG55	rplF	P33229	ralR
P0A7N9	rpmG	P33229	ralR
P36979	rlmN	P33229	ralR
P0A8T7	rpoC	P33229	ralR
P37746	rfbX	P33229	ralR
P60723	rplD	P33229	ralR
P0A8V2	rpoB	P33229	ralR
P37745	rfbC	P33229	ralR
P06992	rsmA	P33229	ralR
P05719	hsdS	P33229	ralR
P08957	hsdM	P33229	ralR
P02930	tolC	P33229	ralR
P08956	hsdR	P33229	ralR
P25396	tehA	P33229	ralR
P25397	tehB	P33229	ralR
P0DMC7	rcsB	P33229	ralR
P0C077	relE	P33229	ralR
P33230	rcbA	P33229	ralR
P0A7Z4	rpoA	P77379	rclR
P0A800	rpoZ	P77379	rclR
P0A8T7	rpoC	P77379	rclR
P0AG30	rho	P77379	rclR
P0A8V2	rpoB	P77379	rclR
P0ACM2	rspR	P77379	rclR
P38035	rtcR	P77379	rclR
P11866	tdcR	P77379	rclR
P0ACA3	sspA	P77379	rclR
P64588	yqjI	P77379	rclR
P30864	yafC	P77379	rclR
P67660	yhaJ	P77379	rclR
P0AGB3	rpoH	P77379	rclR
P0DMC9	rcsA	P77379	rclR
P0DMC7	rcsB	P77379	rclR
P09378	rhaR	P77379	rclR
P77732	rhmR	P77379	rclR
P52076	qseB	P77379	rclR
P60240	rapA	P77379	rclR
P0AG71	rmuC	P0AAZ4	rarA
P31667	rpnA	P0AAZ4	rarA
P31665	rpnC	P0AAZ4	rarA
P77768	rpnB	P0AAZ4	rarA
P14294	topB	P0AAZ4	rarA
P0AGB3	rpoH	P0AAZ4	rarA
P0A7H3	recO	P0AAZ4	rarA
P0A7H6	recR	P0AAZ4	rarA
P0A847	tgt	P65870	queD
Q46920	queF	P65870	queD
P39288	queG	P65870	queD
P52108	rstA	P39838	rcsD
P39453	torS	P39838	rcsD
P0AEV1	rssB	P39838	rcsD
P38035	rtcR	P39838	rcsD
P07604	tyrR	P39838	rcsD
P0DMC7	rcsB	P39838	rcsD
P52076	qseB	P39838	rcsD
P38035	rtcR	P0ACQ0	rbsR
P11866	tdcR	P0ACQ0	rbsR
P0ACA3	sspA	P0ACQ0	rbsR
P64588	yqjI	P0ACQ0	rbsR
P0DMC7	rcsB	P0ACQ0	rbsR
P09378	rhaR	P0ACQ0	rbsR
P60240	rapA	P0ACQ0	rbsR
P77379	rclR	P0ACQ0	rbsR
P52108	rstA	P0DMC5	rcsC
P0A881	trpR	P0DMC5	rcsC
P39453	torS	P0DMC5	rcsC
P38684	torR	P0DMC5	rcsC
P0AF96	tabA	P0DMC5	rcsC
P0AEV1	rssB	P0DMC5	rcsC
P18392	rstB	P0DMC5	rcsC
P0AFX4	rsd	P0DMC5	rcsC
P38035	rtcR	P0DMC5	rcsC
P0A9E2	soxS	P0DMC5	rcsC
P0AGE9	sucD	P0DMC5	rcsC
P07604	tyrR	P0DMC5	rcsC
P0A8H8	yacG	P0DMC5	rcsC
P0AGB6	rpoE	P0DMC5	rcsC
P0AGB3	rpoH	P0DMC5	rcsC
P36929	rsmB	P0DMC5	rcsC
P0DMC9	rcsA	P0DMC5	rcsC
P0DMC7	rcsB	P0DMC5	rcsC
P77732	rhmR	P0DMC5	rcsC
Q47274	quuD	P0DMC5	rcsC
P52076	qseB	P0DMC5	rcsC
P39838	rcsD	P0DMC5	rcsC
P0AA47	plaP	P0AFK6	potC
P0AA47	plaP	P31134	potG
P0AFK6	potC	P31134	potG
P21513	rne	P07003	poxB
P0A809	ruvA	P07003	poxB
P06959	aceF	P07003	poxB
P07102	appA	P00634	phoA
P0AG71	rmuC	P04993	recD
P37746	rfbX	P04993	recD
P31667	rpnA	P04993	recD
P31665	rpnC	P04993	recD
P77768	rpnB	P04993	recD
P37745	rfbC	P04993	recD
P14294	topB	P04993	recD
P46850	rtcB	P04993	recD
P75894	rutE	P04993	recD
P07650	deoA	P04993	recD
P76657	yqiJ	P04993	recD
P64588	yqjI	P04993	recD
P0AGB3	rpoH	P04993	recD
P0A7H3	recO	P04993	recD
P33596	recX	P04993	recD
P0A7H6	recR	P04993	recD
P05824	recN	P04993	recD
P22564	rihC	P04993	recD
P0AAZ4	rarA	P04993	recD
P38104	rspA	P77215	rhmD
P42630	tdcG	P77215	rhmD
P0A948	rimJ	P13857	rimL
P0AG71	rmuC	P15043	recQ
P39452	nrdE	P15043	recQ
P37746	rfbX	P15043	recQ
P31667	rpnA	P15043	recQ
P31665	rpnC	P15043	recQ
P77768	rpnB	P15043	recQ
P37745	rfbC	P15043	recQ
P14294	topB	P15043	recQ
P46850	rtcB	P15043	recQ
P75894	rutE	P15043	recQ
P0A809	ruvA	P15043	recQ
P07650	deoA	P15043	recQ
P76657	yqiJ	P15043	recQ
P64588	yqjI	P15043	recQ
Q46948	yajL	P15043	recQ
P0AGB3	rpoH	P15043	recQ
P0A7H3	recO	P15043	recQ
P33596	recX	P15043	recQ
P0A7H6	recR	P15043	recQ
P05824	recN	P15043	recQ
P69924	nrdB	P15043	recQ
P22564	rihC	P15043	recQ
P27298	prlC	P15043	recQ
P0AAZ4	rarA	P15043	recQ
P04993	recD	P15043	recQ
P32169	rhaD	P32171	rhaB
P32156	rhaM	P32171	rhaB
P0AG40	ribF	P0A7J0	ribB
P0A7I7	ribA	P0A7J0	ribB
P61714	ribE	P0A7J0	ribB
P60723	rplD	P25888	rhlE
Q46948	yajL	P25888	rhlE
P00579	rpoD	P25888	rhlE
P0AGB3	rpoH	P25888	rhlE
P23843	oppA	P25888	rhlE
P76182	rsxD	P76470	rhmT
P25396	tehA	P76470	rhmT
P75851	ssuC	P76470	rhmT
P23843	oppA	P76470	rhmT
P0AFH2	oppB	P76470	rhmT
P0AFH6	oppC	P76470	rhmT
P39452	nrdE	P41409	rihA
P07650	deoA	P41409	rihA
P33022	rihB	P41409	rihA
P69924	nrdB	P41409	rihA
P22564	rihC	P41409	rihA
P10442	rnhB	P0A8J8	rhlB
P21513	rne	P0A8J8	rhlB
P21338	rna	P0A8J8	rhlB
P0A7Z4	rpoA	P0C079	relB
P0A800	rpoZ	P0C079	relB
P0A8T7	rpoC	P0C079	relB
P0AG30	rho	P0C079	relB
P0A8V2	rpoB	P0C079	relB
P0ACM2	rspR	P0C079	relB
P30864	yafC	P0C079	relB
P67660	yhaJ	P0C079	relB
P0AGB3	rpoH	P0C079	relB
P0DMC9	rcsA	P0C079	relB
P0DMC7	rcsB	P0C079	relB
P09378	rhaR	P0C079	relB
P77732	rhmR	P0C079	relB
P52076	qseB	P0C079	relB
P77379	rclR	P0C079	relB
P27126	rfaS	P37692	rfaF
P25740	rfaG	P37692	rfaF
P27128	rfaI	P37692	rfaF
P27126	rfaS	P27241	rfaZ
P25740	rfaG	P27241	rfaZ
P27128	rfaI	P27241	rfaZ
P37692	rfaF	P27241	rfaZ
P27126	rfaS	P24173	rfaC
P25740	rfaG	P24173	rfaC
P27128	rfaI	P24173	rfaC
P37692	rfaF	P24173	rfaC
P27241	rfaZ	P24173	rfaC
P0AG71	rmuC	Q47152	rayT
P31667	rpnA	Q47152	rayT
P31665	rpnC	Q47152	rayT
P77768	rpnB	Q47152	rayT
P14294	topB	Q47152	rayT
P0AGB3	rpoH	Q47152	rayT
P0A7H3	recO	Q47152	rayT
P0A7H6	recR	Q47152	rayT
P0AAZ4	rarA	Q47152	rayT
P04993	recD	Q47152	rayT
P15043	recQ	Q47152	rayT
P0A7N4	rpmF	P24554	radA
P68919	rplY	P24554	radA
P46850	rtcB	P24554	radA
P0A809	ruvA	P24554	radA
P77499	sufC	P24554	radA
P0A884	thyA	P24554	radA
Q46948	yajL	P24554	radA
P0A7H3	recO	P24554	radA
P33596	recX	P24554	radA
P0A7H6	recR	P24554	radA
P05824	recN	P24554	radA
P15043	recQ	P24554	radA
P37746	rfbX	P0A7G2	rbfA
P37745	rfbC	P0A7G2	rbfA
P46850	rtcB	P0A7G2	rbfA
P75894	rutE	P0A7G2	rbfA
P07650	deoA	P0A7G2	rbfA
P76657	yqiJ	P0A7G2	rbfA
P64588	yqjI	P0A7G2	rbfA
P21499	rnr	P0A7G2	rbfA
P33596	recX	P0A7G2	rbfA
P05824	recN	P0A7G2	rbfA
P22564	rihC	P0A7G2	rbfA
P0A7X6	rimM	P0A7G2	rbfA
P04993	recD	P0A7G2	rbfA
P15043	recQ	P0A7G2	rbfA
P39452	nrdE	P08244	pyrF
P69924	nrdB	P08244	pyrF
P0A7F3	pyrI	P08244	pyrF
P41409	rihA	P08244	pyrF
P0A7Y0	rnc	P0A894	rapZ
P0A7Y8	rnpA	P0A894	rapZ
P46850	rtcB	P0A894	rapZ
P0A7L0	rplA	P0AGL5	ratA
P0A847	tgt	P77756	queC
Q46920	queF	P77756	queC
P39288	queG	P77756	queC
P65870	queD	P77756	queC
P0A847	tgt	P64554	queE
Q46920	queF	P64554	queE
P39288	queG	P64554	queE
P65870	queD	P64554	queE
P77756	queC	P64554	queE
P76182	rsxD	P37624	rbbA
P25396	tehA	P37624	rbbA
P75851	ssuC	P37624	rbbA
P23843	oppA	P37624	rbbA
P0AFH2	oppB	P37624	rbbA
P0AFH6	oppC	P37624	rbbA
P76470	rhmT	P37624	rbbA
P0AG71	rmuC	P36767	rdgC
P31667	rpnA	P36767	rdgC
P31665	rpnC	P36767	rdgC
P77768	rpnB	P36767	rdgC
P14294	topB	P36767	rdgC
P0AGB3	rpoH	P36767	rdgC
P0A7H3	recO	P36767	rdgC
P0A7H6	recR	P36767	rdgC
P0AAZ4	rarA	P36767	rdgC
P04993	recD	P36767	rdgC
P15043	recQ	P36767	rdgC
Q47152	rayT	P36767	rdgC
P0A7N4	rpmF	P0A7G6	recA
P0AG71	rmuC	P0A7G6	recA
P68919	rplY	P0A7G6	recA
P37746	rfbX	P0A7G6	recA
P31667	rpnA	P0A7G6	recA
P31665	rpnC	P0A7G6	recA
P77768	rpnB	P0A7G6	recA
P37745	rfbC	P0A7G6	recA
P14294	topB	P0A7G6	recA
P46850	rtcB	P0A7G6	recA
P75894	rutE	P0A7G6	recA
P0A809	ruvA	P0A7G6	recA
P77499	sufC	P0A7G6	recA
P0A884	thyA	P0A7G6	recA
P07650	deoA	P0A7G6	recA
P76657	yqiJ	P0A7G6	recA
P64588	yqjI	P0A7G6	recA
Q46948	yajL	P0A7G6	recA
P30864	yafC	P0A7G6	recA
P0AGB3	rpoH	P0A7G6	recA
P0A7H3	recO	P0A7G6	recA
P33596	recX	P0A7G6	recA
P0A7H6	recR	P0A7G6	recA
P05824	recN	P0A7G6	recA
P22564	rihC	P0A7G6	recA
P0AA47	plaP	P0A7G6	recA
P33919	radD	P0A7G6	recA
P0AAZ4	rarA	P0A7G6	recA
P04993	recD	P0A7G6	recA
P15043	recQ	P0A7G6	recA
Q47152	rayT	P0A7G6	recA
P24554	radA	P0A7G6	recA
P0A7G2	rbfA	P0A7G6	recA
P36767	rdgC	P0A7G6	recA
P37746	rfbX	P64534	rcnB
P37745	rfbC	P64534	rcnB
P46850	rtcB	P64534	rcnB
P75894	rutE	P64534	rcnB
P07650	deoA	P64534	rcnB
P76657	yqiJ	P64534	rcnB
P64588	yqjI	P64534	rcnB
P33596	recX	P64534	rcnB
P05824	recN	P64534	rcnB
P22564	rihC	P64534	rcnB
P04993	recD	P64534	rcnB
P15043	recQ	P64534	rcnB
P0A7G2	rbfA	P64534	rcnB
P0A7G6	recA	P64534	rcnB
P76425	rcnA	P64534	rcnB
P0AG55	rplF	P0A7K6	rplS
P0A7R1	rplI	P0A7K6	rplS
P0C0R7	rlmE	P0A7K6	rplS
P60422	rplB	P0A7K6	rplS
P60438	rplC	P0A7K6	rplS
P62399	rplE	P0A7K6	rplS
P0A7L3	rplT	P0A7K6	rplS
Q2EEQ2	ykgO	P0A7K6	rplS
P0A7Q6	rpmJ	P0A7K6	rplS
P0ADY7	rplP	P0A7K6	rplS
P0AG48	rplU	P0A7K6	rplS
P0A7N4	rpmF	P0A7K6	rplS
P0A7N9	rpmG	P0A7K6	rplS
P0A7P5	rpmH	P0A7K6	rplS
P0A7Q1	rpmI	P0A7K6	rplS
P0A7L8	rpmA	P0A7K6	rplS
P0A7R5	rpsJ	P0A7K6	rplS
P33643	rluD	P0A7K6	rplS
P0C018	rplR	P0A7K6	rplS
P0A7K2	rplL	P0A7K6	rplS
P60624	rplX	P0A7K6	rplS
P68919	rplY	P0A7K6	rplS
P0A7L0	rplA	P0A7K6	rplS
P0A7J3	rplJ	P0A7K6	rplS
P0AA10	rplM	P0A7K6	rplS
P0ADY3	rplN	P0A7K6	rplS
P0AG44	rplQ	P0A7K6	rplS
P02413	rplO	P0A7K6	rplS
P0A7M2	rpmB	P0A7K6	rplS
P0A7N1	ykgM	P0A7K6	rplS
P0A7M9	rpmE	P0A7K6	rplS
P0A7M6	rpmC	P0A7K6	rplS
P0AG51	rpmD	P0A7K6	rplS
P60723	rplD	P0A7K6	rplS
P0A7U3	rpsS	P0A7K6	rplS
P02359	rpsG	P0A7K6	rplS
P0A7W7	rpsH	P0A7K6	rplS
P21507	srmB	P0A7K6	rplS
P0ADZ0	rplW	P0A7K6	rplS
P0AG67	rpsA	P0A7K6	rplS
P0A8A8	rimP	P0A7K6	rplS
P33919	radD	P0A7K6	rplS
P0AG55	rplF	P61175	rplV
[truncated: 77,795 more rows]

## Sheet: STRING
UniprotID_p1	GeneName_p1	UniprotID_p2	GeneName_p2
P0AG55	rplF	P0A7R1	rplI
P75817	rlmC	P36999	rlmA
P36999	rlmA	P63177	rlmB
P0AG55	rplF	P60422	rplB
P0A7R1	rplI	P60422	rplB
P0C0R7	rlmE	P60422	rplB
P0AG55	rplF	P60438	rplC
P0A7R1	rplI	P60438	rplC
P0C0R7	rlmE	P60438	rplC
P60422	rplB	P60438	rplC
P0AG55	rplF	P62399	rplE
P0A7R1	rplI	P62399	rplE
P60422	rplB	P62399	rplE
P60438	rplC	P62399	rplE
P0A7R1	rplI	P76104	rlhA
P0AG55	rplF	P0A7L3	rplT
P0A7R1	rplI	P0A7L3	rplT
P60422	rplB	P0A7L3	rplT
P60438	rplC	P0A7L3	rplT
P62399	rplE	P0A7L3	rplT
P0AG55	rplF	Q2EEQ2	ykgO
P0A7R1	rplI	Q2EEQ2	ykgO
P60422	rplB	Q2EEQ2	ykgO
P60438	rplC	Q2EEQ2	ykgO
P62399	rplE	Q2EEQ2	ykgO
P0A7L3	rplT	Q2EEQ2	ykgO
P0AG55	rplF	P0A7Q6	rpmJ
P0A7R1	rplI	P0A7Q6	rpmJ
P60422	rplB	P0A7Q6	rpmJ
P60438	rplC	P0A7Q6	rpmJ
P62399	rplE	P0A7Q6	rpmJ
P0A7L3	rplT	P0A7Q6	rpmJ
Q2EEQ2	ykgO	P0A7Q6	rpmJ
P0AG55	rplF	P0ADY7	rplP
P0A7R1	rplI	P0ADY7	rplP
P60422	rplB	P0ADY7	rplP
P60438	rplC	P0ADY7	rplP
P62399	rplE	P0ADY7	rplP
P0A7L3	rplT	P0ADY7	rplP
Q2EEQ2	ykgO	P0ADY7	rplP
P0A7Q6	rpmJ	P0ADY7	rplP
P0AG55	rplF	P0AG48	rplU
P0A7R1	rplI	P0AG48	rplU
P60422	rplB	P0AG48	rplU
P60438	rplC	P0AG48	rplU
P62399	rplE	P0AG48	rplU
P0A7L3	rplT	P0AG48	rplU
Q2EEQ2	ykgO	P0AG48	rplU
P0A7Q6	rpmJ	P0AG48	rplU
P0ADY7	rplP	P0AG48	rplU
P0AG55	rplF	P0A7N4	rpmF
P0A7R1	rplI	P0A7N4	rpmF
P60422	rplB	P0A7N4	rpmF
P60438	rplC	P0A7N4	rpmF
P62399	rplE	P0A7N4	rpmF
P0A7L3	rplT	P0A7N4	rpmF
Q2EEQ2	ykgO	P0A7N4	rpmF
P0A7Q6	rpmJ	P0A7N4	rpmF
P0ADY7	rplP	P0A7N4	rpmF
P0AG48	rplU	P0A7N4	rpmF
P0AG55	rplF	P0A7N9	rpmG
P0A7R1	rplI	P0A7N9	rpmG
P60422	rplB	P0A7N9	rpmG
P60438	rplC	P0A7N9	rpmG
P62399	rplE	P0A7N9	rpmG
P0A7L3	rplT	P0A7N9	rpmG
Q2EEQ2	ykgO	P0A7N9	rpmG
P0A7Q6	rpmJ	P0A7N9	rpmG
P0ADY7	rplP	P0A7N9	rpmG
P0AG48	rplU	P0A7N9	rpmG
P0A7N4	rpmF	P0A7N9	rpmG
P60422	rplB	P0A7Z4	rpoA
P62399	rplE	P0A7Z4	rpoA
P0AG55	rplF	P0A7P5	rpmH
P0A7R1	rplI	P0A7P5	rpmH
P60422	rplB	P0A7P5	rpmH
P60438	rplC	P0A7P5	rpmH
P62399	rplE	P0A7P5	rpmH
P0A7L3	rplT	P0A7P5	rpmH
Q2EEQ2	ykgO	P0A7P5	rpmH
P0A7Q6	rpmJ	P0A7P5	rpmH
P0ADY7	rplP	P0A7P5	rpmH
P0AG48	rplU	P0A7P5	rpmH
P0A7N4	rpmF	P0A7P5	rpmH
P0A7N9	rpmG	P0A7P5	rpmH
P0AG55	rplF	P0A7Q1	rpmI
P0A7R1	rplI	P0A7Q1	rpmI
P60422	rplB	P0A7Q1	rpmI
P60438	rplC	P0A7Q1	rpmI
P62399	rplE	P0A7Q1	rpmI
P0A7L3	rplT	P0A7Q1	rpmI
Q2EEQ2	ykgO	P0A7Q1	rpmI
P0A7Q6	rpmJ	P0A7Q1	rpmI
P0ADY7	rplP	P0A7Q1	rpmI
P0AG48	rplU	P0A7Q1	rpmI
P0A7N4	rpmF	P0A7Q1	rpmI
P0A7N9	rpmG	P0A7Q1	rpmI
P0A7P5	rpmH	P0A7Q1	rpmI
P0A7Z4	rpoA	P24255	rpoN
P0AG55	rplF	P0A7L8	rpmA
P0A7R1	rplI	P0A7L8	rpmA
P60422	rplB	P0A7L8	rpmA
P60438	rplC	P0A7L8	rpmA
P62399	rplE	P0A7L8	rpmA
P0A7L3	rplT	P0A7L8	rpmA
Q2EEQ2	ykgO	P0A7L8	rpmA
P0A7Q6	rpmJ	P0A7L8	rpmA
P0ADY7	rplP	P0A7L8	rpmA
P0AG48	rplU	P0A7L8	rpmA
P0A7N4	rpmF	P0A7L8	rpmA
P0A7N9	rpmG	P0A7L8	rpmA
P0A7P5	rpmH	P0A7L8	rpmA
P0A7Q1	rpmI	P0A7L8	rpmA
P0AG55	rplF	P0A7R5	rpsJ
P0A7R1	rplI	P0A7R5	rpsJ
P60422	rplB	P0A7R5	rpsJ
P60438	rplC	P0A7R5	rpsJ
P62399	rplE	P0A7R5	rpsJ
P0A7L3	rplT	P0A7R5	rpsJ
Q2EEQ2	ykgO	P0A7R5	rpsJ
P0A7Q6	rpmJ	P0A7R5	rpsJ
P0ADY7	rplP	P0A7R5	rpsJ
P0AG48	rplU	P0A7R5	rpsJ
P0A7N4	rpmF	P0A7R5	rpsJ
P0A7N9	rpmG	P0A7R5	rpsJ
P0A7P5	rpmH	P0A7R5	rpsJ
P0A7Q1	rpmI	P0A7R5	rpsJ
P0A7L8	rpmA	P0A7R5	rpsJ
P63177	rlmB	P75864	rlmL
P0AA37	rluA	P33643	rluD
P0AG07	rpe	P0A9J0
P76104	rlhA	P36979	rlmN
P62399	rplE	P0A800	rpoZ
P0A7Z4	rpoA	P0A800	rpoZ
P24255	rpoN	P0A800	rpoZ
P0AG55	rplF	P37765	rluB
P0A7R1	rplI	P37765	rluB
P60422	rplB	P37765	rluB
P0AA37	rluA	P37765	rluB
P75864	rlmL	P37765	rluB
P0A7R1	rplI	P0A7Y0	rnc
P60422	rplB	P0A7Y0	rnc
P60438	rplC	P0A7Y0	rnc
P0A7L3	rplT	P0A7Y0	rnc
Q2EEQ2	ykgO	P0A7Y0	rnc
P0A7Q6	rpmJ	P0A7Y0	rnc
P0ADY7	rplP	P0A7Y0	rnc
P0AG48	rplU	P0A7Y0	rnc
P0A7N4	rpmF	P0A7Y0	rnc
P0A7N9	rpmG	P0A7Y0	rnc
P0A7L8	rpmA	P0A7Y0	rnc
P0A7R5	rpsJ	P0A7Y0	rnc
P37765	rluB	P37634	rlmJ
P0A7Z4	rpoA	P0A8T7	rpoC
P24255	rpoN	P0A8T7	rpoC
P0A800	rpoZ	P0A8T7	rpoC
P0AG55	rplF	P0C018	rplR
P0A7R1	rplI	P0C018	rplR
P60422	rplB	P0C018	rplR
P60438	rplC	P0C018	rplR
P62399	rplE	P0C018	rplR
P0A7L3	rplT	P0C018	rplR
Q2EEQ2	ykgO	P0C018	rplR
P0A7Q6	rpmJ	P0C018	rplR
P0ADY7	rplP	P0C018	rplR
P0AG48	rplU	P0C018	rplR
P0A7N4	rpmF	P0C018	rplR
P0A7N9	rpmG	P0C018	rplR
P0A7P5	rpmH	P0C018	rplR
P0A7Q1	rpmI	P0C018	rplR
P0A7L8	rpmA	P0C018	rplR
P0A7R5	rpsJ	P0C018	rplR
P0AG55	rplF	P0A7K2	rplL
P0A7R1	rplI	P0A7K2	rplL
P60422	rplB	P0A7K2	rplL
P60438	rplC	P0A7K2	rplL
P62399	rplE	P0A7K2	rplL
P0A7L3	rplT	P0A7K2	rplL
Q2EEQ2	ykgO	P0A7K2	rplL
P0A7Q6	rpmJ	P0A7K2	rplL
P0ADY7	rplP	P0A7K2	rplL
P0AG48	rplU	P0A7K2	rplL
P0A7N4	rpmF	P0A7K2	rplL
P0A7N9	rpmG	P0A7K2	rplL
P0A7P5	rpmH	P0A7K2	rplL
P0A7Q1	rpmI	P0A7K2	rplL
P0A7L8	rpmA	P0A7K2	rplL
P0A7R5	rpsJ	P0A7K2	rplL
P0A7Y0	rnc	P0A7K2	rplL
P0C018	rplR	P0A7K2	rplL
P37765	rluB	P75876	rlmI
P37765	rluB	P75966	rluE
P0AG55	rplF	P60624	rplX
P0A7R1	rplI	P60624	rplX
P60422	rplB	P60624	rplX
P60438	rplC	P60624	rplX
P62399	rplE	P60624	rplX
P0A7L3	rplT	P60624	rplX
Q2EEQ2	ykgO	P60624	rplX
P0A7Q6	rpmJ	P60624	rplX
P0ADY7	rplP	P60624	rplX
P0AG48	rplU	P60624	rplX
P0A7N4	rpmF	P60624	rplX
P0A7N9	rpmG	P60624	rplX
P0A7P5	rpmH	P60624	rplX
P0A7Q1	rpmI	P60624	rplX
P0A7L8	rpmA	P60624	rplX
P0A7R5	rpsJ	P60624	rplX
P37765	rluB	P60624	rplX
P0A7Y0	rnc	P60624	rplX
P0C018	rplR	P60624	rplX
P0A7K2	rplL	P60624	rplX
P0AA37	rluA	P32684	rluF
P27830	rffG	P37759	rfbB
P0AG55	rplF	P09155	rnd
P60422	rplB	P09155	rnd
P60438	rplC	P09155	rnd
P62399	rplE	P09155	rnd
P0C018	rplR	P09155	rnd
P60624	rplX	P09155	rnd
P37765	rluB	P0A7Y8	rnpA
P0A7R1	rplI	P21513	rne
P75864	rlmL	P21513	rne
P36979	rlmN	P21513	rne
P37765	rluB	P21513	rne
P0AG55	rplF	P68919	rplY
P0A7R1	rplI	P68919	rplY
P60422	rplB	P68919	rplY
P60438	rplC	P68919	rplY
P62399	rplE	P68919	rplY
P0A7L3	rplT	P68919	rplY
Q2EEQ2	ykgO	P68919	rplY
P0A7Q6	rpmJ	P68919	rplY
P0ADY7	rplP	P68919	rplY
P0AG48	rplU	P68919	rplY
P0A7N4	rpmF	P68919	rplY
P0A7N9	rpmG	P68919	rplY
P0A7P5	rpmH	P68919	rplY
P0A7Q1	rpmI	P68919	rplY
P0A7L8	rpmA	P68919	rplY
P0A7R5	rpsJ	P68919	rplY
P37765	rluB	P68919	rplY
P0C018	rplR	P68919	rplY
P0A7K2	rplL	P68919	rplY
P60624	rplX	P68919	rplY
P0AG55	rplF	P0A7L0	rplA
P0A7R1	rplI	P0A7L0	rplA
P60422	rplB	P0A7L0	rplA
P60438	rplC	P0A7L0	rplA
P62399	rplE	P0A7L0	rplA
P0A7L3	rplT	P0A7L0	rplA
Q2EEQ2	ykgO	P0A7L0	rplA
P0A7Q6	rpmJ	P0A7L0	rplA
P0ADY7	rplP	P0A7L0	rplA
P0AG48	rplU	P0A7L0	rplA
P0A7N4	rpmF	P0A7L0	rplA
P0A7N9	rpmG	P0A7L0	rplA
P0A7P5	rpmH	P0A7L0	rplA
P0A7Q1	rpmI	P0A7L0	rplA
P0A7L8	rpmA	P0A7L0	rplA
P0A7R5	rpsJ	P0A7L0	rplA
P75864	rlmL	P0A7L0	rplA
P0C018	rplR	P0A7L0	rplA
P0A7K2	rplL	P0A7L0	rplA
P60624	rplX	P0A7L0	rplA
P21513	rne	P0A7L0	rplA
P68919	rplY	P0A7L0	rplA
P0A7Z4	rpoA	P39452	nrdE
P0AG55	rplF	P0A7J3	rplJ
P0A7R1	rplI	P0A7J3	rplJ
P0C0R7	rlmE	P0A7J3	rplJ
P60422	rplB	P0A7J3	rplJ
P60438	rplC	P0A7J3	rplJ
P62399	rplE	P0A7J3	rplJ
P0A7L3	rplT	P0A7J3	rplJ
Q2EEQ2	ykgO	P0A7J3	rplJ
P0A7Q6	rpmJ	P0A7J3	rplJ
P0ADY7	rplP	P0A7J3	rplJ
P0AG48	rplU	P0A7J3	rplJ
P0A7N4	rpmF	P0A7J3	rplJ
P0A7N9	rpmG	P0A7J3	rplJ
P0A7P5	rpmH	P0A7J3	rplJ
P0A7Q1	rpmI	P0A7J3	rplJ
P0A7L8	rpmA	P0A7J3	rplJ
P0A7R5	rpsJ	P0A7J3	rplJ
P0C018	rplR	P0A7J3	rplJ
P0A7K2	rplL	P0A7J3	rplJ
P60624	rplX	P0A7J3	rplJ
P09155	rnd	P0A7J3	rplJ
P68919	rplY	P0A7J3	rplJ
P0A7L0	rplA	P0A7J3	rplJ
P0A8T7	rpoC	P30176	ybiA
P0AG55	rplF	P0AA10	rplM
P0A7R1	rplI	P0AA10	rplM
P60422	rplB	P0AA10	rplM
P60438	rplC	P0AA10	rplM
P62399	rplE	P0AA10	rplM
P0A7L3	rplT	P0AA10	rplM
Q2EEQ2	ykgO	P0AA10	rplM
P0A7Q6	rpmJ	P0AA10	rplM
P0ADY7	rplP	P0AA10	rplM
P0AG48	rplU	P0AA10	rplM
P0A7N4	rpmF	P0AA10	rplM
P0A7N9	rpmG	P0AA10	rplM
P0A7P5	rpmH	P0AA10	rplM
P0A7Q1	rpmI	P0AA10	rplM
P0A7L8	rpmA	P0AA10	rplM
P0A7R5	rpsJ	P0AA10	rplM
P0A7Y0	rnc	P0AA10	rplM
P0C018	rplR	P0AA10	rplM
P0A7K2	rplL	P0AA10	rplM
P60624	rplX	P0AA10	rplM
P09155	rnd	P0AA10	rplM
P68919	rplY	P0AA10	rplM
P0A7L0	rplA	P0AA10	rplM
P0A7J3	rplJ	P0AA10	rplM
P0AG55	rplF	P0ADY3	rplN
P0A7R1	rplI	P0ADY3	rplN
P60422	rplB	P0ADY3	rplN
P60438	rplC	P0ADY3	rplN
P62399	rplE	P0ADY3	rplN
P0A7L3	rplT	P0ADY3	rplN
Q2EEQ2	ykgO	P0ADY3	rplN
P0A7Q6	rpmJ	P0ADY3	rplN
P0ADY7	rplP	P0ADY3	rplN
P0AG48	rplU	P0ADY3	rplN
P0A7N4	rpmF	P0ADY3	rplN
P0A7N9	rpmG	P0ADY3	rplN
P0A7P5	rpmH	P0ADY3	rplN
P0A7Q1	rpmI	P0ADY3	rplN
P0A7L8	rpmA	P0ADY3	rplN
P0A7R5	rpsJ	P0ADY3	rplN
P0C018	rplR	P0ADY3	rplN
P0A7K2	rplL	P0ADY3	rplN
P60624	rplX	P0ADY3	rplN
P09155	rnd	P0ADY3	rplN
P68919	rplY	P0ADY3	rplN
P0A7L0	rplA	P0ADY3	rplN
P0A7J3	rplJ	P0ADY3	rplN
P0AA10	rplM	P0ADY3	rplN
P0AG55	rplF	P0AG44	rplQ
P0A7R1	rplI	P0AG44	rplQ
P60422	rplB	P0AG44	rplQ
P60438	rplC	P0AG44	rplQ
P62399	rplE	P0AG44	rplQ
P0A7L3	rplT	P0AG44	rplQ
Q2EEQ2	ykgO	P0AG44	rplQ
P0A7Q6	rpmJ	P0AG44	rplQ
P0ADY7	rplP	P0AG44	rplQ
P0AG48	rplU	P0AG44	rplQ
P0A7N4	rpmF	P0AG44	rplQ
P0A7N9	rpmG	P0AG44	rplQ
P0A7Z4	rpoA	P0AG44	rplQ
P0A7P5	rpmH	P0AG44	rplQ
P0A7Q1	rpmI	P0AG44	rplQ
P0A7L8	rpmA	P0AG44	rplQ
P0A7R5	rpsJ	P0AG44	rplQ
P0A7Y0	rnc	P0AG44	rplQ
P0A8T7	rpoC	P0AG44	rplQ
P0C018	rplR	P0AG44	rplQ
P0A7K2	rplL	P0AG44	rplQ
P60624	rplX	P0AG44	rplQ
P68919	rplY	P0AG44	rplQ
P0A7L0	rplA	P0AG44	rplQ
P0A7J3	rplJ	P0AG44	rplQ
P0AA10	rplM	P0AG44	rplQ
P0ADY3	rplN	P0AG44	rplQ
P0AG55	rplF	P02413	rplO
P0A7R1	rplI	P02413	rplO
P0C0R7	rlmE	P02413	rplO
P60422	rplB	P02413	rplO
P60438	rplC	P02413	rplO
P62399	rplE	P02413	rplO
P0A7L3	rplT	P02413	rplO
Q2EEQ2	ykgO	P02413	rplO
P0A7Q6	rpmJ	P02413	rplO
P0ADY7	rplP	P02413	rplO
P0AG48	rplU	P02413	rplO
P0A7N4	rpmF	P02413	rplO
P0A7N9	rpmG	P02413	rplO
P0A7P5	rpmH	P02413	rplO
P0A7Q1	rpmI	P02413	rplO
P0A7L8	rpmA	P02413	rplO
P0A7R5	rpsJ	P02413	rplO
P0A7Y0	rnc	P02413	rplO
P0C018	rplR	P02413	rplO
P0A7K2	rplL	P02413	rplO
P60624	rplX	P02413	rplO
P09155	rnd	P02413	rplO
P68919	rplY	P02413	rplO
P0A7L0	rplA	P02413	rplO
P0A7J3	rplJ	P02413	rplO
P0AA10	rplM	P02413	rplO
P0ADY3	rplN	P02413	rplO
P0AG44	rplQ	P02413	rplO
P0AG55	rplF	P0A7M2	rpmB
P0A7R1	rplI	P0A7M2	rpmB
P60422	rplB	P0A7M2	rpmB
P60438	rplC	P0A7M2	rpmB
P62399	rplE	P0A7M2	rpmB
P0A7L3	rplT	P0A7M2	rpmB
Q2EEQ2	ykgO	P0A7M2	rpmB
P0A7Q6	rpmJ	P0A7M2	rpmB
P0ADY7	rplP	P0A7M2	rpmB
P0AG48	rplU	P0A7M2	rpmB
P0A7N4	rpmF	P0A7M2	rpmB
P0A7N9	rpmG	P0A7M2	rpmB
P0A7P5	rpmH	P0A7M2	rpmB
P0A7Q1	rpmI	P0A7M2	rpmB
P0A7L8	rpmA	P0A7M2	rpmB
P0A7R5	rpsJ	P0A7M2	rpmB
P0C018	rplR	P0A7M2	rpmB
P0A7K2	rplL	P0A7M2	rpmB
P60624	rplX	P0A7M2	rpmB
P68919	rplY	P0A7M2	rpmB
P0A7L0	rplA	P0A7M2	rpmB
P0A7J3	rplJ	P0A7M2	rpmB
P0AA10	rplM	P0A7M2	rpmB
P0ADY3	rplN	P0A7M2	rpmB
P0AG44	rplQ	P0A7M2	rpmB
P02413	rplO	P0A7M2	rpmB
P0AG55	rplF	P0A7N1	ykgM
P0A7R1	rplI	P0A7N1	ykgM
P60422	rplB	P0A7N1	ykgM
P60438	rplC	P0A7N1	ykgM
P62399	rplE	P0A7N1	ykgM
P0A7L3	rplT	P0A7N1	ykgM
Q2EEQ2	ykgO	P0A7N1	ykgM
P0A7Q6	rpmJ	P0A7N1	ykgM
P0ADY7	rplP	P0A7N1	ykgM
P0AG48	rplU	P0A7N1	ykgM
P0A7N4	rpmF	P0A7N1	ykgM
P0A7N9	rpmG	P0A7N1	ykgM
P0A7P5	rpmH	P0A7N1	ykgM
P0A7Q1	rpmI	P0A7N1	ykgM
P0A7L8	rpmA	P0A7N1	ykgM
P0C018	rplR	P0A7N1	ykgM
P0A7K2	rplL	P0A7N1	ykgM
P60624	rplX	P0A7N1	ykgM
P68919	rplY	P0A7N1	ykgM
P0A7L0	rplA	P0A7N1	ykgM
P0A7J3	rplJ	P0A7N1	ykgM
P0AA10	rplM	P0A7N1	ykgM
P0ADY3	rplN	P0A7N1	ykgM
P0AG44	rplQ	P0A7N1	ykgM
P02413	rplO	P0A7N1	ykgM
P0A7M2	rpmB	P0A7N1	ykgM
P0AG07	rpe	P37351	rpiB
P0AG55	rplF	P0A7M9	rpmE
P0A7R1	rplI	P0A7M9	rpmE
P60422	rplB	P0A7M9	rpmE
P60438	rplC	P0A7M9	rpmE
P62399	rplE	P0A7M9	rpmE
P0A7L3	rplT	P0A7M9	rpmE
Q2EEQ2	ykgO	P0A7M9	rpmE
P0A7Q6	rpmJ	P0A7M9	rpmE
P0ADY7	rplP	P0A7M9	rpmE
P0AG48	rplU	P0A7M9	rpmE
P0A7N4	rpmF	P0A7M9	rpmE
P0A7N9	rpmG	P0A7M9	rpmE
P0A7P5	rpmH	P0A7M9	rpmE
P0A7Q1	rpmI	P0A7M9	rpmE
P0A7L8	rpmA	P0A7M9	rpmE
P0A7R5	rpsJ	P0A7M9	rpmE
P0C018	rplR	P0A7M9	rpmE
P0A7K2	rplL	P0A7M9	rpmE
P60624	rplX	P0A7M9	rpmE
P68919	rplY	P0A7M9	rpmE
P0A7L0	rplA	P0A7M9	rpmE
P0A7J3	rplJ	P0A7M9	rpmE
P0AA10	rplM	P0A7M9	rpmE
P0ADY3	rplN	P0A7M9	rpmE
P0AG44	rplQ	P0A7M9	rpmE
P02413	rplO	P0A7M9	rpmE
P0A7M2	rpmB	P0A7M9	rpmE
P0A7N1	ykgM	P0A7M9	rpmE
P0AG55	rplF	P0A7M6	rpmC
P0A7R1	rplI	P0A7M6	rpmC
P0C0R7	rlmE	P0A7M6	rpmC
P60422	rplB	P0A7M6	rpmC
P60438	rplC	P0A7M6	rpmC
P62399	rplE	P0A7M6	rpmC
P0A7L3	rplT	P0A7M6	rpmC
Q2EEQ2	ykgO	P0A7M6	rpmC
P0A7Q6	rpmJ	P0A7M6	rpmC
P0ADY7	rplP	P0A7M6	rpmC
P0AG48	rplU	P0A7M6	rpmC
P0A7N4	rpmF	P0A7M6	rpmC
P0A7N9	rpmG	P0A7M6	rpmC
P0A7P5	rpmH	P0A7M6	rpmC
P0A7Q1	rpmI	P0A7M6	rpmC
P0A7L8	rpmA	P0A7M6	rpmC
P0A7R5	rpsJ	P0A7M6	rpmC
P0C018	rplR	P0A7M6	rpmC
P0A7K2	rplL	P0A7M6	rpmC
P60624	rplX	P0A7M6	rpmC
P09155	rnd	P0A7M6	rpmC
P68919	rplY	P0A7M6	rpmC
P0A7L0	rplA	P0A7M6	rpmC
P0A7J3	rplJ	P0A7M6	rpmC
P0AA10	rplM	P0A7M6	rpmC
P0ADY3	rplN	P0A7M6	rpmC
P0AG44	rplQ	P0A7M6	rpmC
P02413	rplO	P0A7M6	rpmC
P0A7M2	rpmB	P0A7M6	rpmC
P0A7N1	ykgM	P0A7M6	rpmC
P0A7M9	rpmE	P0A7M6	rpmC
P0AG55	rplF	P0AG51	rpmD
P0A7R1	rplI	P0AG51	rpmD
P0C0R7	rlmE	P0AG51	rpmD
P60422	rplB	P0AG51	rpmD
P60438	rplC	P0AG51	rpmD
P62399	rplE	P0AG51	rpmD
P0A7L3	rplT	P0AG51	rpmD
Q2EEQ2	ykgO	P0AG51	rpmD
P0A7Q6	rpmJ	P0AG51	rpmD
P0ADY7	rplP	P0AG51	rpmD
P0AG48	rplU	P0AG51	rpmD
P0A7N4	rpmF	P0AG51	rpmD
P0A7N9	rpmG	P0AG51	rpmD
P0A7P5	rpmH	P0AG51	rpmD
P0A7Q1	rpmI	P0AG51	rpmD
P0A7L8	rpmA	P0AG51	rpmD
P0A7R5	rpsJ	P0AG51	rpmD
P0C018	rplR	P0AG51	rpmD
P0A7K2	rplL	P0AG51	rpmD
P60624	rplX	P0AG51	rpmD
P09155	rnd	P0AG51	rpmD
P68919	rplY	P0AG51	rpmD
P0A7L0	rplA	P0AG51	rpmD
P0A7J3	rplJ	P0AG51	rpmD
P0AA10	rplM	P0AG51	rpmD
P0ADY3	rplN	P0AG51	rpmD
P0AG44	rplQ	P0AG51	rpmD
P02413	rplO	P0AG51	rpmD
P0A7M2	rpmB	P0AG51	rpmD
P0A7N1	ykgM	P0AG51	rpmD
P0A7M9	rpmE	P0AG51	rpmD
P0A7M6	rpmC	P0AG51	rpmD
P0AG55	rplF	P60723	rplD
P0A7R1	rplI	P60723	rplD
P0C0R7	rlmE	P60723	rplD
P60422	rplB	P60723	rplD
P60438	rplC	P60723	rplD
P62399	rplE	P60723	rplD
P0A7L3	rplT	P60723	rplD
Q2EEQ2	ykgO	P60723	rplD
P0A7Q6	rpmJ	P60723	rplD
P0ADY7	rplP	P60723	rplD
P0AG48	rplU	P60723	rplD
P0A7N4	rpmF	P60723	rplD
P0A7N9	rpmG	P60723	rplD
P0A7P5	rpmH	P60723	rplD
P0A7Q1	rpmI	P60723	rplD
P0A7L8	rpmA	P60723	rplD
P0A7R5	rpsJ	P60723	rplD
P0A7Y0	rnc	P60723	rplD
P0C018	rplR	P60723	rplD
P0A7K2	rplL	P60723	rplD
P60624	rplX	P60723	rplD
P09155	rnd	P60723	rplD
P68919	rplY	P60723	rplD
P0A7L0	rplA	P60723	rplD
P0A7J3	rplJ	P60723	rplD
P0AA10	rplM	P60723	rplD
P0ADY3	rplN	P60723	rplD
P0AG44	rplQ	P60723	rplD
P02413	rplO	P60723	rplD
P0A7M2	rpmB	P60723	rplD
P0A7N1	ykgM	P60723	rplD
P0A7M9	rpmE	P60723	rplD
P0A7M6	rpmC	P60723	rplD
P0AG51	rpmD	P60723	rplD
P62399	rplE	P0A8V2	rpoB
P0A7Z4	rpoA	P0A8V2	rpoB
P24255	rpoN	P0A8V2	rpoB
P0A800	rpoZ	P0A8V2	rpoB
P0A8T7	rpoC	P0A8V2	rpoB
P39452	nrdE	P0A8V2	rpoB
P0AG44	rplQ	P0A8V2	rpoB
P0AA37	rluA	P0AA39	rluC
P75864	rlmL	P0AA39	rluC
P33643	rluD	P0AA39	rluC
P37765	rluB	P0AA39	rluC
P37634	rlmJ	P0AA39	rluC
P0A8T7	rpoC	P0AA39	rluC
P0C018	rplR	P0AA39	rluC
P0AG44	rplQ	P0AA39	rluC
P37760	rfbD	P37745	rfbC
P0A7Z4	rpoA	P0ACI0	rob
P0AG55	rplF	P0A7U3	rpsS
P0A7R1	rplI	P0A7U3	rpsS
P36999	rlmA	P0A7U3	rpsS
P60422	rplB	P0A7U3	rpsS
P60438	rplC	P0A7U3	rpsS
P62399	rplE	P0A7U3	rpsS
P0A7L3	rplT	P0A7U3	rpsS
P0A7Q6	rpmJ	P0A7U3	rpsS
P0ADY7	rplP	P0A7U3	rpsS
P0AG48	rplU	P0A7U3	rpsS
P0A7N4	rpmF	P0A7U3	rpsS
P0A7N9	rpmG	P0A7U3	rpsS
P0A7P5	rpmH	P0A7U3	rpsS
P0A7Q1	rpmI	P0A7U3	rpsS
P0A7L8	rpmA	P0A7U3	rpsS
P0A7R5	rpsJ	P0A7U3	rpsS
P0A9J0		P0A7U3	rpsS
P0C018	rplR	P0A7U3	rpsS
P0A7K2	rplL	P0A7U3	rpsS
P60624	rplX	P0A7U3	rpsS
P68919	rplY	P0A7U3	rpsS
P0A7L0	rplA	P0A7U3	rpsS
P0A7J3	rplJ	P0A7U3	rpsS
P0AA10	rplM	P0A7U3	rpsS
P0ADY3	rplN	P0A7U3	rpsS
P0AG44	rplQ	P0A7U3	rpsS
P02413	rplO	P0A7U3	rpsS
P0A7M2	rpmB	P0A7U3	rpsS
P0A7M9	rpmE	P0A7U3	rpsS
P0A7M6	rpmC	P0A7U3	rpsS
P0AG51	rpmD	P0A7U3	rpsS
P60723	rplD	P0A7U3	rpsS
P0AA37	rluA	P0AA43	rsuA
P0A7J3	rplJ	P06992	rsmA
P60723	rplD	P06992	rsmA
P0AG55	rplF	P02359	rpsG
P0A7R1	rplI	P02359	rpsG
P36999	rlmA	P02359	rpsG
P60422	rplB	P02359	rpsG
P60438	rplC	P02359	rpsG
P62399	rplE	P02359	rpsG
P0A7L3	rplT	P02359	rpsG
Q2EEQ2	ykgO	P02359	rpsG
P0A7Q6	rpmJ	P02359	rpsG
P0ADY7	rplP	P02359	rpsG
P0AG48	rplU	P02359	rpsG
P0A7N4	rpmF	P02359	rpsG
P0A7N9	rpmG	P02359	rpsG
P0A7P5	rpmH	P02359	rpsG
P0A7Q1	rpmI	P02359	rpsG
P0A7L8	rpmA	P02359	rpsG
P0A7R5	rpsJ	P02359	rpsG
P0A7Y0	rnc	P02359	rpsG
P0C018	rplR	P02359	rpsG
P0A7K2	rplL	P02359	rpsG
P60624	rplX	P02359	rpsG
P68919	rplY	P02359	rpsG
P0A7L0	rplA	P02359	rpsG
P0A7J3	rplJ	P02359	rpsG
P0AA10	rplM	P02359	rpsG
P0ADY3	rplN	P02359	rpsG
P0AG44	rplQ	P02359	rpsG
P02413	rplO	P02359	rpsG
P0A7M2	rpmB	P02359	rpsG
P0A7M9	rpmE	P02359	rpsG
P0A7M6	rpmC	P02359	rpsG
P0AG51	rpmD	P02359	rpsG
P60723	rplD	P02359	rpsG
P0A7U3	rpsS	P02359	rpsG
P06992	rsmA	P02359	rpsG
P0AG55	rplF	P0A7W7	rpsH
P0A7R1	rplI	P0A7W7	rpsH
P36999	rlmA	P0A7W7	rpsH
P60422	rplB	P0A7W7	rpsH
P60438	rplC	P0A7W7	rpsH
P62399	rplE	P0A7W7	rpsH
P0A7L3	rplT	P0A7W7	rpsH
P0A7Q6	rpmJ	P0A7W7	rpsH
P0ADY7	rplP	P0A7W7	rpsH
P0AG48	rplU	P0A7W7	rpsH
P0A7N4	rpmF	P0A7W7	rpsH
P0A7N9	rpmG	P0A7W7	rpsH
P0A7P5	rpmH	P0A7W7	rpsH
P0A7Q1	rpmI	P0A7W7	rpsH
P0A7L8	rpmA	P0A7W7	rpsH
P0A7R5	rpsJ	P0A7W7	rpsH
P0C018	rplR	P0A7W7	rpsH
P0A7K2	rplL	P0A7W7	rpsH
P60624	rplX	P0A7W7	rpsH
P68919	rplY	P0A7W7	rpsH
P0A7L0	rplA	P0A7W7	rpsH
P0A7J3	rplJ	P0A7W7	rpsH
P0AA10	rplM	P0A7W7	rpsH
P0ADY3	rplN	P0A7W7	rpsH
P0AG44	rplQ	P0A7W7	rpsH
P02413	rplO	P0A7W7	rpsH
P0A7M2	rpmB	P0A7W7	rpsH
P0A7M9	rpmE	P0A7W7	rpsH
P0A7M6	rpmC	P0A7W7	rpsH
P0AG51	rpmD	P0A7W7	rpsH
P60723	rplD	P0A7W7	rpsH
P0A7U3	rpsS	P0A7W7	rpsH
P02359	rpsG	P0A7W7	rpsH
P0A877	trpA	P0A879	trpB
P63177	rlmB	P0AF67	tsaE
P0AF67	tsaE	P76256	tsaB
P33225	torA	P36662	torD
P24255	rpoN	P39453	torS
P0A8V2	rpoB	P39453	torS
P52108	rstA	P39453	torS
P38683	torT	P39453	torS
P33225	torA	P33226	torC
P39453	torS	P38684	torR
P0A877	trpA	P00909	trpC
P0A879	trpB	P00909	trpC
P00895	trpE	P00909	trpC
P05719	hsdS	P08957	hsdM
P0A855	tolB	P19934	tolA
P19934	tolA	P0ABU9	tolQ
P0A870	talB	P0A858	tpiA
P0A7Z4	rpoA	P06612	topA
P0A800	rpoZ	P06612	topA
P37765	rluB	P06612	topA
P0A8T7	rpoC	P06612	topA
P0A8V2	rpoB	P06612	topA
P14294	topB	P06612	topA
P19934	tolA	P0ABV6	tolR
P0ABU9	tolQ	P0ABV6	tolR
P39453	torS	P02929	tonB
P0ABV6	tolR	P02929	tonB
P05719	hsdS	P08956	hsdR
P08957	hsdM	P08956	hsdR
P0A7R5	rpsJ	P52045	scpB
P02359	rpsG	P52045	scpB
P39453	torS	P52045	scpB
P0AG55	rplF	P0AGA2	secY
P60422	rplB	P0AGA2	secY
P60438	rplC	P0AGA2	secY
P62399	rplE	P0AGA2	secY
P0ADY7	rplP	P0AGA2	secY
P0A7R5	rpsJ	P0AGA2	secY
P0C018	rplR	P0AGA2	secY
P60624	rplX	P0AGA2	secY
P0A7L0	rplA	P0AGA2	secY
P0A7J3	rplJ	P0AGA2	secY
P0AA10	rplM	P0AGA2	secY
P0ADY3	rplN	P0AGA2	secY
P02413	rplO	P0AGA2	secY
P0A7M6	rpmC	P0AGA2	secY
P0AG51	rpmD	P0AGA2	secY
P60723	rplD	P0AGA2	secY
P0A7U3	rpsS	P0AGA2	secY
P02359	rpsG	P0AGA2	secY
P0A7W7	rpsH	P0AGA2	secY
P0AGA2	secY	P0AG90	secD
P75817	rlmC	P76273	rsmF
P36999	rlmA	P76273	rsmF
P0C0R7	rlmE	P76273	rsmF
P60422	rplB	P76273	rsmF
P60438	rplC	P76273	rsmF
P55135	rlmD	P76273	rsmF
P0A7L0	rplA	P76273	rsmF
P0A7J3	rplJ	P76273	rsmF
P02413	rplO	P76273	rsmF
P0A7M6	rpmC	P76273	rsmF
P0AG51	rpmD	P76273	rsmF
P76149	sad	P38105	rspB
P39453	torS	P0AEV1	rssB
P52108	rstA	P18392	rstB
P38683	torT	P18392	rstB
P0AFX7	rseA	P0AFX9	rseB
P24255	rpoN	P0AFX4	rsd
P76273	rsmF	P0ADX9	rsmD
P75893	rutF	P75898	rutA
P0AG07	rpe	P0A7Z0	rpiA
P37351	rpiB	P0A7Z0	rpiA
P0A7Z4	rpoA	P0A9E2	soxS
P75864	rlmL	P0A847	tgt
P37765	rluB	P0A847	tgt
P0AG44	rplQ	P0A847	tgt
P27253	scpA	P0AGE9	sucD
P0A7L0	rplA	P77499	sufC
P0A7U3	rpsS	P25397	tehB
P02359	rpsG	P25397	tehB
P0A7W7	rpsH	P25397	tehB
P76145	tam	P25397	tehB
P76273	rsmF	P25397	tehB
P0ADX9	rsmD	P25397	tehB
P0A800	rpoZ	P09158	speE
P0AG55	rplF	P21507	srmB
P0C0R7	rlmE	P21507	srmB
P60422	rplB	P21507	srmB
P60438	rplC	P21507	srmB
P62399	rplE	P21507	srmB
P0A7Z4	rpoA	P21507	srmB
P75864	rlmL	P21507	srmB
P36979	rlmN	P21507	srmB
P37765	rluB	P21507	srmB
P0A7Y0	rnc	P21507	srmB
P0A8T7	rpoC	P21507	srmB
P60624	rplX	P21507	srmB
P09155	rnd	P21507	srmB
P21513	rne	P21507	srmB
P0A7L0	rplA	P21507	srmB
P0A7J3	rplJ	P21507	srmB
P0AA10	rplM	P21507	srmB
P0ADY3	rplN	P21507	srmB
P02413	rplO	P21507	srmB
P0A7M6	rpmC	P21507	srmB
P0AG51	rpmD	P21507	srmB
P60723	rplD	P21507	srmB
P0A8V2	rpoB	P21507	srmB
P0AA39	rluC	P21507	srmB
P06992	rsmA	P21507	srmB
P0A7W7	rpsH	P21507	srmB
P76273	rsmF	P21507	srmB
P46850	rtcB	P21507	srmB
P75898	rutA	P75853	ssuA
P75851	ssuC	P75853	ssuA
P0AG78	sbp	P75853	ssuA
P75898	rutA	P0AAI1	ssuB
P75851	ssuC	P0AAI1	ssuB
P0AG78	sbp	P0AAI1	ssuB
P75853	ssuA	P0AAI1	ssuB
P0A7Z4	rpoA	P0AGK1	ubiA
P0A800	rpoZ	P0AGK1	ubiA
Q46871	yqjH	P64588	yqjI
P0A8V2	rpoB	P64610	yrbL
P39453	torS	P64610	yrbL
P18392	rstB	P64610	yrbL
P21507	srmB	P64610	yrbL
P61887	rffH	P37744	rfbA
P0AG55	rplF	P0ADZ0	rplW
P0A7R1	rplI	P0ADZ0	rplW
P0C0R7	rlmE	P0ADZ0	rplW
P60422	rplB	P0ADZ0	rplW
P60438	rplC	P0ADZ0	rplW
P62399	rplE	P0ADZ0	rplW
P0A7L3	rplT	P0ADZ0	rplW
Q2EEQ2	ykgO	P0ADZ0	rplW
P0A7Q6	rpmJ	P0ADZ0	rplW
P0ADY7	rplP	P0ADZ0	rplW
P0AG48	rplU	P0ADZ0	rplW
P0A7N4	rpmF	P0ADZ0	rplW
P0A7N9	rpmG	P0ADZ0	rplW
P0A7P5	rpmH	P0ADZ0	rplW
P0A7Q1	rpmI	P0ADZ0	rplW
P0A7L8	rpmA	P0ADZ0	rplW
P0A7R5	rpsJ	P0ADZ0	rplW
P0C018	rplR	P0ADZ0	rplW
P0A7K2	rplL	P0ADZ0	rplW
P60624	rplX	P0ADZ0	rplW
P09155	rnd	P0ADZ0	rplW
P21513	rne	P0ADZ0	rplW
P68919	rplY	P0ADZ0	rplW
P0A7L0	rplA	P0ADZ0	rplW
P0A7J3	rplJ	P0ADZ0	rplW
P0AA10	rplM	P0ADZ0	rplW
P0ADY3	rplN	P0ADZ0	rplW
P0AG44	rplQ	P0ADZ0	rplW
P02413	rplO	P0ADZ0	rplW
P0A7M2	rpmB	P0ADZ0	rplW
P0A7N1	ykgM	P0ADZ0	rplW
P0A7M9	rpmE	P0ADZ0	rplW
P0A7M6	rpmC	P0ADZ0	rplW
P0AG51	rpmD	P0ADZ0	rplW
P60723	rplD	P0ADZ0	rplW
P0A7U3	rpsS	P0ADZ0	rplW
P02359	rpsG	P0ADZ0	rplW
P0A7W7	rpsH	P0ADZ0	rplW
P0AGA2	secY	P0ADZ0	rplW
P76273	rsmF	P0ADZ0	rplW
P21507	srmB	P0ADZ0	rplW
P52129	rnlA	P52130	rnlB
P14294	topB	P0A7Y4	rnhA
P06612	topA	P0A7Y4	rnhA
P24255	rpoN	P0AGB6	rpoE
P0AFX7	rseA	P0AGB6	rpoE
P0AFX9	rseB	P0AGB6	rpoE
P0AFX4	rsd	P0AGB6	rpoE
P0AG55	rplF	P21499	rnr
P0A7R1	rplI	P21499	rnr
P0A7L3	rplT	P21499	rnr
P75864	rlmL	P21499	rnr
P36979	rlmN	P21499	rnr
P37765	rluB	P21499	rnr
P75876	rlmI	P21499	rnr
P60624	rplX	P21499	rnr
P09155	rnd	P21499	rnr
P21513	rne	P21499	rnr
P0A7L0	rplA	P21499	rnr
P0A7J3	rplJ	P21499	rnr
P0AA39	rluC	P21499	rnr
P0A847	tgt	P21499	rnr
P0A7Z4	rpoA	P00579	rpoD
P24255	rpoN	P00579	rpoD
P0A800	rpoZ	P00579	rpoD
P0A8T7	rpoC	P00579	rpoD
P0A8V2	rpoB	P00579	rpoD
P39453	torS	P00579	rpoD
P0AFX4	rsd	P00579	rpoD
P24255	rpoN	P13445	rpoS
P0A8V2	rpoB	P13445	rpoS
P39453	torS	P13445	rpoS
P0AEV1	rssB	P13445	rpoS
P0AFX4	rsd	P13445	rpoS
P0A7Z4	rpoA	P0AGB3	rpoH
P24255	rpoN	P0AGB3	rpoH
P0A8T7	rpoC	P0AGB3	rpoH
P39453	torS	P0AGB3	rpoH
P0AFX4	rsd	P0AGB3	rpoH
P60422	rplB	P30014	rnt
P0A7J3	rplJ	P30014	rnt
P0AG55	rplF	P0AG67	rpsA
P0A7R1	rplI	P0AG67	rpsA
P0C0R7	rlmE	P0AG67	rpsA
P60422	rplB	P0AG67	rpsA
P60438	rplC	P0AG67	rpsA
P62399	rplE	P0AG67	rpsA
P0A7L3	rplT	P0AG67	rpsA
P0A7Q6	rpmJ	P0AG67	rpsA
P0ADY7	rplP	P0AG67	rpsA
P0AG48	rplU	P0AG67	rpsA
P0A7N4	rpmF	P0AG67	rpsA
P0A7N9	rpmG	P0AG67	rpsA
P0A7P5	rpmH	P0AG67	rpsA
P0A7Q1	rpmI	P0AG67	rpsA
P0A7L8	rpmA	P0AG67	rpsA
P0A7R5	rpsJ	P0AG67	rpsA
P37765	rluB	P0AG67	rpsA
P0C018	rplR	P0AG67	rpsA
P0A7K2	rplL	P0AG67	rpsA
P60624	rplX	P0AG67	rpsA
P09155	rnd	P0AG67	rpsA
P68919	rplY	P0AG67	rpsA
P0A7L0	rplA	P0AG67	rpsA
P0A7J3	rplJ	P0AG67	rpsA
P0AA10	rplM	P0AG67	rpsA
P0ADY3	rplN	P0AG67	rpsA
P0AG44	rplQ	P0AG67	rpsA
P02413	rplO	P0AG67	rpsA
P0A7M2	rpmB	P0AG67	rpsA
P0A7M9	rpmE	P0AG67	rpsA
P0A7M6	rpmC	P0AG67	rpsA
P0AG51	rpmD	P0AG67	rpsA
P60723	rplD	P0AG67	rpsA
P0A7U3	rpsS	P0AG67	rpsA
P06992	rsmA	P0AG67	rpsA
P02359	rpsG	P0AG67	rpsA
P0A7W7	rpsH	P0AG67	rpsA
P21507	srmB	P0AG67	rpsA
P0ADZ0	rplW	P0AG67	rpsA
P75817	rlmC	P36929	rsmB
P36999	rlmA	P36929	rsmB
P63177	rlmB	P36929	rsmB
P0C0R7	rlmE	P36929	rsmB
P60422	rplB	P36929	rsmB
P60438	rplC	P36929	rsmB
P0A7R5	rpsJ	P36929	rsmB
P55135	rlmD	P36929	rsmB
P42596	rlmG	P36929	rsmB
P0A7L0	rplA	P36929	rsmB
P0A7J3	rplJ	P36929	rsmB
P02413	rplO	P36929	rsmB
P0A7M6	rpmC	P36929	rsmB
P0AG51	rpmD	P36929	rsmB
P0ADX9	rsmD	P36929	rsmB
P25397	tehB	P36929	rsmB
P21507	srmB	P36929	rsmB
P0ADZ0	rplW	P36929	rsmB
P0AGB6	rpoE	P36929	rsmB
P0A9P4	trxB	P77212	rclA
P45469	yraR	P77212	rclA
P00579	rpoD	P77212	rclA
P13445	rpoS	P77212	rclA
P0AGB3	rpoH	P77212	rclA
P39453	torS	P0DMC9	rcsA
P0ADZ0	rplW	P0DMC9	rcsA
P39453	torS	P0DMC7	rcsB
P36929	rsmB	P0DMC7	rcsB
P0DMC9	rcsA	P0DMC7	rcsB
P0ACI0	rob	P09378	rhaR
P0A7I7	ribA	P61714	ribE
P0A7H3	recO	P0A7H6	recR
P76104	rlhA	P05824	recN
P64610	yrbL	P25740	rfaG
P39452	nrdE	P69924	nrdB
P64610	yrbL	P27128	rfaI
P25740	rfaG	P27128	rfaI
P0A7R1	rplI	P0A7I0	prfA
P60422	rplB	P0A7I0	prfA
P60438	rplC	P0A7I0	prfA
P0A7L3	rplT	P0A7I0	prfA
Q2EEQ2	ykgO	P0A7I0	prfA
P0A7Q6	rpmJ	P0A7I0	prfA
P0ADY7	rplP	P0A7I0	prfA
P0AG48	rplU	P0A7I0	prfA
P0A7N4	rpmF	P0A7I0	prfA
P0A7N9	rpmG	P0A7I0	prfA
P0A7L8	rpmA	P0A7I0	prfA
P0A7R5	rpsJ	P0A7I0	prfA
P0A7Y0	rnc	P0A7I0	prfA
P60624	rplX	P0A7I0	prfA
P0A7L0	rplA	P0A7I0	prfA
P0AA10	rplM	P0A7I0	prfA
P0AG44	rplQ	P0A7I0	prfA
P02413	rplO	P0A7I0	prfA
P60723	rplD	P0A7I0	prfA
P02359	rpsG	P0A7I0	prfA
P76149	sad	P09546	putA
P52045	scpB	P09546	putA
P0AG90	secD	P09546	putA
P77212	rclA	P09546	putA
P45469	yraR	P0AA53	qmcA
P77212	rclA	P39315	qorB
P0AA53	qmcA	P39315	qorB
P0A7Z4	rpoA	P0A7E5	pyrG
P0A800	rpoZ	P0A7E5	pyrG
P0A7Y0	rnc	P0A7E5	pyrG
P0A8T7	rpoC	P0A7E5	pyrG
P0A8V2	rpoB	P0A7E5	pyrG
P39453	torS	P52076	qseB
P0ADZ0	rplW	P0A7E9	pyrH
P0AGE9	sucD	P0AFG3	sucA
P77212	rclA	P0AFG3	sucA
P39453	torS	P06959	aceF
P18392	rstB	P06959	aceF
P77212	rclA	P06959	aceF
P0AFG3	sucA	P06959	aceF
P0ADA1	tesA	P75920	mdoC
P23843	oppA	P0AFH2	oppB
P23843	oppA	P0AFH6	oppC
P0AFH2	oppB	P0AFH6	oppC
P23843	oppA	P77737	oppF
P0AFH2	oppB	P77737	oppF
P0AFH6	oppC	P77737	oppF
P0A7Z4	rpoA	P60240	rapA
P0A800	rpoZ	P60240	rapA
P0A8T7	rpoC	P60240	rapA
P0A8V2	rpoB	P60240	rapA
P14294	topB	P60240	rapA
P06612	topA	P60240	rapA
P21507	srmB	P60240	rapA
P0A7Z4	rpoA	P33919	radD
P0A800	rpoZ	P33919	radD
P0A8T7	rpoC	P33919	radD
P0A8V2	rpoB	P33919	radD
P60240	rapA	P33919	radD
P38683	torT	P0AGI1	rbsC
P23843	oppA	P0AGI1	rbsC
P24255	rpoN	P39838	rcsD
P38683	torT	P39838	rcsD
P39453	torS	P39838	rcsD
P52045	scpB	P39838	rcsD
P64610	yrbL	P39838	rcsD
P00579	rpoD	P39838	rcsD
P13445	rpoS	P39838	rcsD
P0AGB3	rpoH	P39838	rcsD
P0DMC9	rcsA	P39838	rcsD
P0DMC7	rcsB	P39838	rcsD
P06959	aceF	P39838	rcsD
P24255	rpoN	P0DMC5	rcsC
P38683	torT	P0DMC5	rcsC
P39453	torS	P0DMC5	rcsC
P52045	scpB	P0DMC5	rcsC
P64610	yrbL	P0DMC5	rcsC
P00579	rpoD	P0DMC5	rcsC
P13445	rpoS	P0DMC5	rcsC
P0AGB3	rpoH	P0DMC5	rcsC
P0DMC7	rcsB	P0DMC5	rcsC
P06959	aceF	P0DMC5	rcsC
P39838	rcsD	P0DMC5	rcsC
P39453	torS	P23842	pdeA
P39838	rcsD	P23842	pdeA
P0DMC5	rcsC	P23842	pdeA
P23843	oppA	P0AFK6	potC
P0AGI1	rbsC	P0AFK6	potC
P23843	oppA	P31134	potG
P0AGI1	rbsC	P31134	potG
P0AFK6	potC	P31134	potG
P52045	scpB	P07003	poxB
P0A9E2	soxS	P07003	poxB
P0AG40	ribF	P07102	appA
P07102	appA	P00634	phoA
P14294	topB	P04993	recD
P0A809	ruvA	P04993	recD
P0AG40	ribF	P04993	recD
P09155	rnd	P15043	recQ
P0A7M2	rpmB	P15043	recQ
P14294	topB	P15043	recQ
P06612	topA	P15043	recQ
P0A809	ruvA	P15043	recQ
P21507	srmB	P15043	recQ
P0A7Y4	rnhA	P15043	recQ
P60240	rapA	P15043	recQ
P0AAZ4	rarA	P15043	recQ
P32169	rhaD	P32171	rhaB
P0A7I7	ribA	P0A7J0	ribB
P0AG55	rplF	P25888	rhlE
P0C0R7	rlmE	P25888	rhlE
P60422	rplB	P25888	rhlE
P60438	rplC	P25888	rhlE
P62399	rplE	P25888	rhlE
P0A7Z4	rpoA	P25888	rhlE
P0A7Y0	rnc	P25888	rhlE
P0A8T7	rpoC	P25888	rhlE
P60624	rplX	P25888	rhlE
P09155	rnd	P25888	rhlE
P0A7L0	rplA	P25888	rhlE
P0A7J3	rplJ	P25888	rhlE
P0AA10	rplM	P25888	rhlE
P0ADY3	rplN	P25888	rhlE
P02413	rplO	P25888	rhlE
P0A7M6	rpmC	P25888	rhlE
P0AG51	rpmD	P25888	rhlE
P60723	rplD	P25888	rhlE
P0A8V2	rpoB	P25888	rhlE
P0AA39	rluC	P25888	rhlE
P06992	rsmA	P25888	rhlE
P0A7W7	rpsH	P25888	rhlE
P76273	rsmF	P25888	rhlE
P46850	rtcB	P25888	rhlE
P64610	yrbL	P25888	rhlE
P0ADZ0	rplW	P25888	rhlE
P0AG67	rpsA	P25888	rhlE
P36929	rsmB	P25888	rhlE
P60240	rapA	P25888	rhlE
P15043	recQ	P25888	rhlE
P22564	rihC	P41409	rihA
P0AG55	rplF	P0A8J8	rhlB
P0C0R7	rlmE	P0A8J8	rhlB
P60422	rplB	P0A8J8	rhlB
P60438	rplC	P0A8J8	rhlB
P62399	rplE	P0A8J8	rhlB
P0A7Z4	rpoA	P0A8J8	rhlB
P0A7Y0	rnc	P0A8J8	rhlB
P0A8T7	rpoC	P0A8J8	rhlB
P60624	rplX	P0A8J8	rhlB
P09155	rnd	P0A8J8	rhlB
P21513	rne	P0A8J8	rhlB
P0A7L0	rplA	P0A8J8	rhlB
P0A7J3	rplJ	P0A8J8	rhlB
P0AA10	rplM	P0A8J8	rhlB
P0ADY3	rplN	P0A8J8	rhlB
P02413	rplO	P0A8J8	rhlB
P0A7M6	rpmC	P0A8J8	rhlB
P0AG51	rpmD	P0A8J8	rhlB
P60723	rplD	P0A8J8	rhlB
P0A8V2	rpoB	P0A8J8	rhlB
P0A7U3	rpsS	P0A8J8	rhlB
P06992	rsmA	P0A8J8	rhlB
P0A7W7	rpsH	P0A8J8	rhlB
P76273	rsmF	P0A8J8	rhlB
P46850	rtcB	P0A8J8	rhlB
P64610	yrbL	P0A8J8	rhlB
P0ADZ0	rplW	P0A8J8	rhlB
P0AG67	rpsA	P0A8J8	rhlB
P36929	rsmB	P0A8J8	rhlB
P60240	rapA	P0A8J8	rhlB
P15043	recQ	P0A8J8	rhlB
P0C077	relE	P0C079	relB
P64610	yrbL	P37692	rfaF
P25740	rfaG	P37692	rfaF
P27128	rfaI	P37692	rfaF
P64610	yrbL	P24173	rfaC
P25740	rfaG	P24173	rfaC
P27128	rfaI	P24173	rfaC
P37692	rfaF	P24173	rfaC
P52108	rstA	P40719	qseC
P38683	torT	P40719	qseC
P39453	torS	P40719	qseC
P64610	yrbL	P40719	qseC
P52076	qseB	P40719	qseC
P06959	aceF	P40719	qseC
P0DMC5	rcsC	P40719	qseC
P0A7R5	rpsJ	P37624	rbbA
P0A7U3	rpsS	P37624	rbbA
P02359	rpsG	P37624	rbbA
P0A7W7	rpsH	P37624	rbbA
P0AG67	rpsA	P37624	rbbA
P23843	oppA	P37624	rbbA
P0AGI1	rbsC	P37624	rbbA
P0AFK6	potC	P37624	rbbA
P31134	potG	P37624	rbbA
P0ACQ0	rbsR	P0A9J6	rbsK
P0A7Z4	rpoA	P36767	rdgC
P0A8T7	rpoC	P36767	rdgC
P0A8V2	rpoB	P36767	rdgC
P14294	topB	P0A7G6	recA
P0A858	tpiA	P0A7G6	recA
P06612	topA	P0A7G6	recA
P64610	yrbL	P0A7G6	recA
P33596	recX	P0A7G6	recA
P60240	rapA	P0A7G6	recA
P15043	recQ	P0A7G6	recA
P24554	radA	P0A7G6	recA
P0AG55	rplF	P0A7K6	rplS
P0A7R1	rplI	P0A7K6	rplS
P60422	rplB	P0A7K6	rplS
P60438	rplC	P0A7K6	rplS
P62399	rplE	P0A7K6	rplS
P0A7L3	rplT	P0A7K6	rplS
Q2EEQ2	ykgO	P0A7K6	rplS
P0A7Q6	rpmJ	P0A7K6	rplS
P0ADY7	rplP	P0A7K6	rplS
P0AG48	rplU	P0A7K6	rplS
P0A7N4	rpmF	P0A7K6	rplS
P0A7N9	rpmG	P0A7K6	rplS
P0A7P5	rpmH	P0A7K6	rplS
P0A7Q1	rpmI	P0A7K6	rplS
P0A7L8	rpmA	P0A7K6	rplS
P0A7R5	rpsJ	P0A7K6	rplS
P0A7Y0	rnc	P0A7K6	rplS
P0C018	rplR	P0A7K6	rplS
P0A7K2	rplL	P0A7K6	rplS
P60624	rplX	P0A7K6	rplS
P68919	rplY	P0A7K6	rplS
P0A7L0	rplA	P0A7K6	rplS
P0A7J3	rplJ	P0A7K6	rplS
P0AA10	rplM	P0A7K6	rplS
P0ADY3	rplN	P0A7K6	rplS
P0AG44	rplQ	P0A7K6	rplS
P02413	rplO	P0A7K6	rplS
P0A7M2	rpmB	P0A7K6	rplS
P0A7N1	ykgM	P0A7K6	rplS
P0A7M9	rpmE	P0A7K6	rplS
P0A7M6	rpmC	P0A7K6	rplS
P0AG51	rpmD	P0A7K6	rplS
P60723	rplD	P0A7K6	rplS
P0A7U3	rpsS	P0A7K6	rplS
P02359	rpsG	P0A7K6	rplS
P0A7W7	rpsH	P0A7K6	rplS
P0ADZ0	rplW	P0A7K6	rplS
P0AG67	rpsA	P0A7K6	rplS
P0A7I0	prfA	P0A7K6	rplS
P0AG55	rplF	P61175	rplV
P0A7R1	rplI	P61175	rplV
P0C0R7	rlmE	P61175	rplV
P60422	rplB	P61175	rplV
P60438	rplC	P61175	rplV
P62399	rplE	P61175	rplV
P0A7L3	rplT	P61175	rplV
Q2EEQ2	ykgO	P61175	rplV
P0A7Q6	rpmJ	P61175	rplV
P0ADY7	rplP	P61175	rplV
P0AG48	rplU	P61175	rplV
P0A7N4	rpmF	P61175	rplV
P0A7N9	rpmG	P61175	rplV
P0A7P5	rpmH	P61175	rplV
P0A7Q1	rpmI	P61175	rplV
P0A7L8	rpmA	P61175	rplV
P0A7R5	rpsJ	P61175	rplV
P0A7Y0	rnc	P61175	rplV
P0C018	rplR	P61175	rplV
P0A7K2	rplL	P61175	rplV
P60624	rplX	P61175	rplV
P09155	rnd	P61175	rplV
P68919	rplY	P61175	rplV
P0A7L0	rplA	P61175	rplV
P0A7J3	rplJ	P61175	rplV
P0AA10	rplM	P61175	rplV
P0ADY3	rplN	P61175	rplV
P0AG44	rplQ	P61175	rplV
P02413	rplO	P61175	rplV
P0A7M2	rpmB	P61175	rplV
P0A7N1	ykgM	P61175	rplV
P0A7M9	rpmE	P61175	rplV
P0A7M6	rpmC	P61175	rplV
P0AG51	rpmD	P61175	rplV
P60723	rplD	P61175	rplV
P0A7U3	rpsS	P61175	rplV
P02359	rpsG	P61175	rplV
P0A7W7	rpsH	P61175	rplV
P0AGA2	secY	P61175	rplV
P76273	rsmF	P61175	rplV
P21507	srmB	P61175	rplV
P0ADZ0	rplW	P61175	rplV
P0AG67	rpsA	P61175	rplV
P36929	rsmB	P61175	rplV
P0A7I0	prfA	P61175	rplV
P25888	rhlE	P61175	rplV
P0A8J8	rhlB	P61175	rplV
P0A7K6	rplS	P61175	rplV
P08957	hsdM	P0A8F8	uvrB
P0A698	uvrA	P0A8F8	uvrB
P0A8V2	rpoB	P77736	yahD
P64610	yrbL	P77736	yahD
P60240	rapA	P77736	yahD
P0A7G6	recA	P77736	yahD
P61175	rplV	P77736	yahD
P0A8T7	rpoC	P03018	uvrD
P09155	rnd	P03018	uvrD
P0A8V2	rpoB	P03018	uvrD
P0A847	tgt	P03018	uvrD
P60240	rapA	P03018	uvrD
P15043	recQ	P03018	uvrD
P0A7G6	recA	P03018	uvrD
P0A698	uvrA	P03018	uvrD
P0A8F8	uvrB	P03018	uvrD
P0A7Z0	rpiA	P0A8F4	udk
P64610	yrbL	P0A8F4	udk
P0A7E9	pyrH	P0A8F4	udk
P60240	rapA	P0A8F4	udk
P0A8T7	rpoC	P08390	usg
P0A8V2	rpoB	P08390	usg
P23843	oppA	P10906	ugpE
P0AGI1	rbsC	P10906	ugpE
P0AFK6	potC	P10906	ugpE
P31134	potG	P10906	ugpE
P37624	rbbA	P10906	ugpE
P39453	torS	P0AGA6	uhpA
P09835	uhpB	P0AGA6	uhpA
P0DMC7	rcsB	P76373	ugd
P23843	oppA	P10905	ugpA
P0AGI1	rbsC	P10905	ugpA
P0AFK6	potC	P10905	ugpA
P31134	potG	P10905	ugpA
P37624	rbbA	P10905	ugpA
P10906	ugpE	P10905	ugpA
P0A7U3	rpsS	P0A887	ubiE
P02359	rpsG	P0A887	ubiE
P0A7W7	rpsH	P0A887	ubiE
P76273	rsmF	P0A887	ubiE
P36929	rsmB	P0A887	ubiE
P0A8F4	udk	P12758
P38104	rspA	P24215	uxuA
P42604	uxaA	P24215	uxuA
P76149	sad	P77316	ybdR
P33340	yehA	P33342	yehC
P23843	oppA	P33362	yehZ
P0AGI1	rbsC	P33362	yehZ
P0AFK6	potC	P33362	yehZ
P31134	potG	P33362	yehZ
P37624	rbbA	P33362	yehZ
P10906	ugpE	P33362	yehZ
P10905	ugpA	P33362	yehZ
P33360	yehX	P33362	yehZ
P23843	oppA	P33913	yejA
P0AGI1	rbsC	P33913	yejA
P0AFK6	potC	P33913	yejA
P31134	potG	P33913	yejA
P37624	rbbA	P33913	yejA
P10906	ugpE	P33913	yejA
P10905	ugpA	P33913	yejA
P33362	yehZ	P33913	yejA
P33913	yejA	P0AFU0	yejB
P0AG55	rplF	P0AGJ5	yfiF
P0A7R1	rplI	P0AGJ5	yfiF
P60422	rplB	P0AGJ5	yfiF
P0A7L3	rplT	P0AGJ5	yfiF
P0ADY7	rplP	P0AGJ5	yfiF
P75864	rlmL	P0AGJ5	yfiF
P37765	rluB	P0AGJ5	yfiF
P0C018	rplR	P0AGJ5	yfiF
P0A7Y8	rnpA	P0AGJ5	yfiF
P21513	rne	P0AGJ5	yfiF
P0A7L0	rplA	P0AGJ5	yfiF
P0AG44	rplQ	P0AGJ5	yfiF
P0AA39	rluC	P0AGJ5	yfiF
P0A7U3	rpsS	P0AGJ5	yfiF
P0A7W7	rpsH	P0AGJ5	yfiF
P0A847	tgt	P0AGJ5	yfiF
P77499	sufC	P0AGJ5	yfiF
P21499	rnr	P0AGJ5	yfiF
P36929	rsmB	P0AGJ5	yfiF
P07021	yfiB	P64548	yfiR
P64610	yrbL	P27242	waaU
P27128	rfaI	P27242	waaU
P0A7I0	prfA	P27242	waaU
Q46907	ygcQ	Q46908	ygcR
P24255	rpoN	Q46802	ygeV
P39453	torS	Q46802	ygeV
P39838	rcsD	Q46802	ygeV
P0DMC5	rcsC	Q46802	ygeV
P60782	plsY	P56258	wecF
P77736	yahD	P56258	wecF
P76373	ugd	P27829	wecC
P0ABG7	mrdB	P0ADW3	yhcB
P27434	rodZ	P0ADW3	yhcB
P28722	yhcA	P45420	yhcD
P23843	oppA	P45767	yhdX
P0AGI1	rbsC	P45767	yhdX
P0AFK6	potC	P45767	yhdX
P31134	potG	P45767	yhdX
P37624	rbbA	P45767	yhdX
P10906	ugpE	P45767	yhdX
P10905	ugpA	P45767	yhdX
P33362	yehZ	P45767	yhdX
P33913	yejA	P45767	yhdX
P0A8F4	udk	P0AAB2	wzb
P37746	rfbX	P76387	wzc
P25740	rfaG	P76387	wzc
P76373	ugd	P76387	wzc
P27829	wecC	P76387	wzc
P77324	paoB	Q46800	xdhB
P0A809	ruvA	P0A8P6	xerC
P0A7Z4	rpoA	P38506	ygdG
P0A8T7	rpoC	P38506	ygdG
P39452	nrdE	P38506	ygdG
P0A8V2	rpoB	P38506	ygdG
P0A7Y4	rnhA	P38506	ygdG
P60240	rapA	P38506	ygdG
P33919	radD	P38506	ygdG
P04993	recD	P38506	ygdG
P15043	recQ	P38506	ygdG
P0A7G6	recA	P38506	ygdG
P37634	rlmJ	P0A8H6	yihI
P0A8A8	rimP	P0A8H6	yihI
P0A9J6	rbsK	P00944	xylA
P07024	ushA	P0A8Y1	yjjG
P0A855	tolB	P77252	ykgE
P37342	yjjI	P77252	ykgE
P37342	yjjI	P77536	ykgF
P77252	ykgE	P77536	ykgF
P27253	scpA	P77129	ylbE
P0AFG3	sucA	P77129	ylbE
P76145	tam	P76561	ypfH
P39453	torS	P77269	yphF
P18392	rstB	P77269	yphF
P39838	rcsD	P77269	yphF
P0DMC5	rcsC	P77269	yphF
P40719	qseC	P77269	yphF
P0A7Z4	rpoA	P76585	yphG
P0A8T7	rpoC	P76585	yphG
P30176	ybiA	P76585	yphG
P39453	torS	P76585	yphG
P0DMC9	rcsA	P76585	yphG
P0DMC7	rcsB	P76585	yphG
P60240	rapA	P76585	yphG
P33919	radD	P76585	yphG
P77736	yahD	P76585	yphG
P0AGA6	uhpA	P76585	yphG
P56258	wecF	P76585	yphG
P76149	sad	P77581	astC
Q46908	ygcR	P77581	astC
P0A698	uvrA	P0AFP2	atl
P0A800	rpoZ	P0ABB8	mgtA
P0A8T7	rpoC	P0ABB8	mgtA
P0ACI0	rob	P0ABB8	mgtA
P0AA53	qmcA	P0ABB8	mgtA
P75895	rutD	P76458	atoD
P10905	ugpA	P0ABB0	atpA
P0A7Z4	rpoA	P0ABB4	atpD
P0A8T7	rpoC	P0ABB4	atpD
P0A8V2	rpoB	P0ABB4	atpD
P0AGK1	ubiA	P0ABB4	atpD
P77212	rclA	P0ABB4	atpD
P60240	rapA	P0ABB4	atpD
P10905	ugpA	P0ABB4	atpD
P07021	yfiB	P0ABB4	atpD
P76585	yphG	P0ABB4	atpD
P0ABB0	atpA	P0ABB4	atpD
P0ABB0	atpA	P0ABA0	atpF
P0ABB4	atpD	P0ABA0	atpF
P69490	ccmE	P33927	ccmF
P33927	ccmF	P0ABM9	ccmH
P24255	rpoN	P0AEC5	barA
P0A8V2	rpoB	P0AEC5	barA
P52108	rstA	P0AEC5	barA
P38683	torT	P0AEC5	barA
P39453	torS	P0AEC5	barA
P38684	torR	P0AEC5	barA
P0AEV1	rssB	P0AEC5	barA
P18392	rstB	P0AEC5	barA
P64610	yrbL	P0AEC5	barA
P00579	rpoD	P0AEC5	barA
P13445	rpoS	P0AEC5	barA
P0AGB3	rpoH	P0AEC5	barA
P0DMC9	rcsA	P0AEC5	barA
P0DMC7	rcsB	P0AEC5	barA
P52076	qseB	P0AEC5	barA
P06959	aceF	P0AEC5	barA
P39838	rcsD	P0AEC5	barA
P0DMC5	rcsC	P0AEC5	barA
P23842	pdeA	P0AEC5	barA
P40719	qseC	P0AEC5	barA
P0AGA6	uhpA	P0AEC5	barA
Q46802	ygeV	P0AEC5	barA
P77269	yphF	P0AEC5	barA
P39453	torS	P76236	cdgI
P0AEC5	barA	P76236	cdgI
P0A881	trpR	P00887	aroH
P07639	aroB	P00887	aroH
P52045	scpB	P60584	caiA
P09546	putA	P60584	caiA
P06959	aceF	P60584	caiA
Q46907	ygcQ	P60584	caiA
Q46908	ygcR	P60584	caiA
P07604	tyrR	P0A6E1	aroL
P07639	aroB	P0A6E1	aroL
P38105	rspB	P76217	astD
P09546	putA	P76217	astD
P77316	ybdR	P76217	astD
P77581	astC	P76217	astD
P75895	rutD	P76459	atoA
P0AGE9	sucD	P76459	atoA
P77129	ylbE	P76459	atoA
P76458	atoD	P76459	atoA
P24255	rpoN	Q06065	atoC
P39453	torS	Q06065	atoC
P39838	rcsD	Q06065	atoC
P0DMC5	rcsC	Q06065	atoC
P76585	yphG	Q06065	atoC
P0AEC5	barA	Q06065	atoC
P64610	yrbL	P21179	katE
P13445	rpoS	P21179	katE
P07003	poxB	P21179	katE
P77736	yahD	P21179	katE
P52037	ygfF	P21179	katE
P0AG84	yghA	P21179	katE
P60584	caiA	P21179	katE
P0ABB0	atpA	P0AB98	atpB
P0ABB4	atpD	P0AB98	atpB
P0ABA0	atpF	P0AB98	atpB
P23843	oppA	P0ABL8	ccmB
P0AGI1	rbsC	P0ABL8	ccmB
P0AFK6	potC	P0ABL8	ccmB
P31134	potG	P0ABL8	ccmB
P37624	rbbA	P0ABL8	ccmB
P10906	ugpE	P0ABL8	ccmB
P10905	ugpA	P0ABL8	ccmB
P33362	yehZ	P0ABL8	ccmB
P33913	yejA	P0ABL8	ccmB
P45767	yhdX	P0ABL8	ccmB
P69490	ccmE	P0ABL8	ccmB
P69490	ccmE	P0ABM5	ccmD
P0ABL8	ccmB	P0ABM5	ccmD
P0A7Z4	rpoA	P0ABA6	atpG
P0A8V2	rpoB	P0ABA6	atpG
P45469	yraR	P0ABA6	atpG
P39315	qorB	P0ABA6	atpG
P0ABB0	atpA	P0ABA6	atpG
P0ABB4	atpD	P0ABA6	atpG
P0ABA0	atpF	P0ABA6	atpG
P0AB98	atpB	P0ABA6	atpG
P0ABB0	atpA	P0ABC0	atpI
P0ABB4	atpD	P0ABC0	atpI
P0ABA0	atpF	P0ABC0	atpI
P0AB98	atpB	P0ABC0	atpI
P0ABA6	atpG	P0ABC0	atpI
P0ABB0	atpA	P0ABA4	atpH
P0ABB4	atpD	P0ABA4	atpH
P0ABA0	atpF	P0ABA4	atpH
P0AB98	atpB	P0ABA4	atpH
P0ABA6	atpG	P0ABA4	atpH
P0ABC0	atpI	P0ABA4	atpH
P0ABB0	atpA	P0A6E6	atpC
P0ABB4	atpD	P0A6E6	atpC
P0ABA0	atpF	P0A6E6	atpC
P0AB98	atpB	P0A6E6	atpC
P0ABA6	atpG	P0A6E6	atpC
P0ABC0	atpI	P0A6E6	atpC
P0ABA4	atpH	P0A6E6	atpC
P23843	oppA	P33931	ccmA
P0AGI1	rbsC	P33931	ccmA
P0AFK6	potC	P33931	ccmA
P31134	potG	P33931	ccmA
P37624	rbbA	P33931	ccmA
P10906	ugpE	P33931	ccmA
P10905	ugpA	P33931	ccmA
P33362	yehZ	P33931	ccmA
P33913	yejA	P33931	ccmA
P45767	yhdX	P33931	ccmA
P69490	ccmE	P33931	ccmA
P0ABL8	ccmB	P33931	ccmA
P0ABM5	ccmD	P33931	ccmA
P69490	ccmE	P0ABM1	ccmC
P33927	ccmF	P0ABM1	ccmC
P0ABL8	ccmB	P0ABM1	ccmC
P0ABM5	ccmD	P0ABM1	ccmC
P33931	ccmA	P0ABM1	ccmC
P0ABB0	atpA	P68699	atpE
P0ABB4	atpD	P68699	atpE
P0ABA0	atpF	P68699	atpE
P0AB98	atpB	P68699	atpE
P0ABA6	atpG	P68699	atpE
P0ABC0	atpI	P68699	atpE
P0ABA4	atpH	P68699	atpE
P0A6E6	atpC	P68699	atpE
P21507	srmB	P36659	cbpA
P76585	yphG	P36659	cbpA
P36659	cbpA	P63264	cbpM
P0C0R7	rlmE	P0ABH9	clpA
P0A7Z4	rpoA	P0ABH9	clpA
P0A7L8	rpmA	P0ABH9	clpA
P0A800	rpoZ	P0ABH9	clpA
P0A8T7	rpoC	P0ABH9	clpA
P0AG30	rho	P0ABH9	clpA
P0A8V2	rpoB	P0ABH9	clpA
P0A7E9	pyrH	P0ABH9	clpA
P03018	uvrD	P0ABH9	clpA
P0ABB8	mgtA	P0ABH9	clpA
P0AEC5	barA	P0ABH9	clpA
P36659	cbpA	P0ABH9	clpA
P0A7Z4	rpoA	P63284	clpB
P0AFW2	rmf	P63284	clpB
P0A800	rpoZ	P63284	clpB
P0A8T7	rpoC	P63284	clpB
P0A8V2	rpoB	P63284	clpB
P0ABB8	mgtA	P63284	clpB
P0AEC5	barA	P63284	clpB
P36659	cbpA	P63284	clpB
P0ABH9	clpA	P63284	clpB
P0AA84	clsB	P75919	clsC
P0A7E5	pyrG	P00968	carB
P0A7F3	pyrI	P00968	carB
P08390	usg	P00968	carB
Q46803	ygeW	P00968	carB
P00895	trpE	P0A9J8	pheA
P0A7I0	prfA	P0A9J8	pheA
P00887	aroH	P0A9J8	pheA
P0A6E1	aroL	P0A9J8	pheA
P0DMC7	rcsB	P76127	bdm
P0A9P4	trxB	P77395	cnoX
P0ABR7	yeaW	P76254	yeaX
P75817	rlmC	P0ABQ0	coaBC
P0A7Z4	rpoA	P0ABQ0	coaBC
P55135	rlmD	P0ABQ0	coaBC
P0A7L0	rplA	P0ABQ0	coaBC
P61714	ribE	P0ABQ0	coaBC
P0AEV1	rssB	P0A6G7	clpP
P0ABH9	clpA	P0A6G7	clpP
P63284	clpB	P0A6G7	clpP
P0ABH9	clpA	P0A8Q6	clpS
P0C018	rplR	P0ABD5	accA
P31473	ravA	P0ABD5	accA
P75691	yahK	P37686	yiaY
P0A7Z0	rpiA	P42912	agaI
P0A8T7	rpoC	P11989	bglG
P39453	torS	P39404	bglJ
P76585	yphG	P39404	bglJ
P0AEC5	barA	P39404	bglJ
P0ACA3	sspA	P26646	acuI
P00579	rpoD	P26646	acuI
P13445	rpoS	P26646	acuI
P0AGB3	rpoH	P26646	acuI
P77544	yfcF	P26646	acuI
P77526	yfcG	P26646	acuI
P02930	tolC	P31224	acrB
P02930	tolC	P24177	acrD
P0AG55	rplF	P0A6F5	groL
P0A7R5	rpsJ	P0A6F5	groL
P0C018	rplR	P0A6F5	groL
P33667	selU	P0A6F5	groL
P64610	yrbL	P0A6F5	groL
P77212	rclA	P0A6F5	groL
P00944	xylA	P0A6F5	groL
P00887	aroH	P0A6F5	groL
P36659	cbpA	P0A6F5	groL
P0AE39	ypdB	P77808	yfaY
P0A9J8	pheA	P17410	chbR
P0A698	uvrA	P76213	cho
P0A8F8	uvrB	P76213	cho
P36979	rlmN	P30871	ygiF
P37765	rluB	P30871	ygiF
P0AA39	rluC	P30871	ygiF
P21499	rnr	P30871	ygiF
P17410	chbR	P04395	alkA
P27550	acs	P0A6A3	ackA
P02930	tolC	P0AE06	acrA
P31224	acrB	P0AE06	acrA
P24177	acrD	P0AE06	acrA
P39453	torS	P0AE67	cheY
P0AG40	ribF	P0AE67	cheY
P0AEC5	barA	P0AE67	cheY
P0A6G7	clpP	P0AE67	cheY
P75898	rutA	P0AGE6	chrR
P75853	ssuA	P0AGE6	chrR
P0ABQ0	coaBC	P0A6I9	coaE
P0A7Z4	rpoA	P0AE60	cedA
P0A800	rpoZ	P0AE60	cedA
P00579	rpoD	P0AE60	cedA
P39453	torS	P07364	cheR
P39838	rcsD	P07364	cheR
P0DMC5	rcsC	P07364	cheR
P0AEC5	barA	P07364	cheR
P0AE67	cheY	P07364	cheR
P39453	torS	P0A964	cheW
P39838	rcsD	P0A964	cheW
P0DMC5	rcsC	P0A964	cheW
Q46802	ygeV	P0A964	cheW
P0AEC5	barA	P0A964	cheW
P0AE67	cheY	P0A964	cheW
P07364	cheR	P0A964	cheW
Q46829	bglA	P17411	chbF
P37794	chbG	P17411	chbF
P39453	torS	P07330	cheB
P39838	rcsD	P07330	cheB
P0DMC5	rcsC	P07330	cheB
P0AEC5	barA	P07330	cheB
P0AE67	cheY	P07330	cheB
P07364	cheR	P07330	cheB
P0A964	cheW	P07330	cheB
P00895	trpE	P07363	cheA
P39453	torS	P07363	cheA
P18392	rstB	P07363	cheA
P0DMC9	rcsA	P07363	cheA
P0DMC7	rcsB	P07363	cheA
P39838	rcsD	P07363	cheA
P0DMC5	rcsC	P07363	cheA
P23842	pdeA	P07363	cheA
P40719	qseC	P07363	cheA
P0AGA6	uhpA	P07363	cheA
Q46802	ygeV	P07363	cheA
P76585	yphG	P07363	cheA
P0AEC5	barA	P07363	cheA
Q06065	atoC	P07363	cheA
P39404	bglJ	P07363	cheA
P0AE67	cheY	P07363	cheA
P07364	cheR	P07363	cheA
P0A964	cheW	P07363	cheA
P07330	cheB	P07363	cheA
P25397	tehB	P0A9H7	cfa
P39453	torS	P77302	dgcM
P39838	rcsD	P77302	dgcM
P0AEC5	barA	P77302	dgcM
P07363	cheA	P77302	dgcM
P61517	can	P0AFR2	dauA
P31473	ravA	P52095	ldcC
P61175	rplV	P0A6K3	def
P0AEH1	rseP	P39099	degQ
P0AGA2	secY	P39099	degQ
P56258	wecF	P39099	degQ
P0A7Z4	rpoA	P38097	dgcE
P52108	rstA	P38097	dgcE
P39453	torS	P38097	dgcE
P38684	torR	P38097	dgcE
P0AEV1	rssB	P38097	dgcE
P18392	rstB	P38097	dgcE
P00579	rpoD	P38097	dgcE
P13445	rpoS	P38097	dgcE
P0AGB3	rpoH	P38097	dgcE
P52076	qseB	P38097	dgcE
P39838	rcsD	P38097	dgcE
P0DMC5	rcsC	P38097	dgcE
P23842	pdeA	P38097	dgcE
P75995	pdeG	P38097	dgcE
P40719	qseC	P38097	dgcE
Q46802	ygeV	P38097	dgcE
P0AEC5	barA	P38097	dgcE
Q06065	atoC	P38097	dgcE
P0AE67	cheY	P38097	dgcE
P07364	cheR	P38097	dgcE
P0A964	cheW	P38097	dgcE
P07330	cheB	P38097	dgcE
P07363	cheA	P38097	dgcE
P77302	dgcM	P38097	dgcE
P39453	torS	P76147	dgcF
P0AEC5	barA	P76147	dgcF
Q57261	truD	P68646	fixX
Q46907	ygcQ	P68646	fixX
Q46908	ygcR	P68646	fixX
P77221	yahG	P77359	djlC
P02929	tonB	P29680	hemE
P07102	appA	P29680	hemE
P69490	ccmE	P29680	hemE
P0ABM9	ccmH	P29680	hemE
Q06065	atoC	P29680	hemE
P0ABM1	ccmC	P29680	hemE
P0ABD3	bfr	P29680	hemE
P17315	cirA	P29680	hemE
P27838	cyaY	P29680	hemE
P38097	dgcE	P29680	hemE
P0A7P5	rpmH	P24169	speF
P61517	can	P0ABE9	cynT
P0AFR2	dauA	P0ABE9	cynT
P0A8T7	rpoC	P37195	dctR
P39453	torS	P37195	dctR
P76585	yphG	P37195	dctR
P0AEC5	barA	P37195	dctR
P07363	cheA	P37195	dctR
P0AFR2	dauA	P0A830	dctA
P75782	rlmF	P0ACF4	hupB
P0ACI0	rob	P0ACF4	hupB
P05719	hsdS	P0ACF4	hupB
P36767	rdgC	P0ACF4	hupB
P0A8F8	uvrB	P0ACF4	hupB
P0A7G6	recA	P28248	dcd
P39453	torS	P75801	dgcI
P0AEC5	barA	P75801	dgcI
P0ADY3	rplN	P0A6P5	der
P0A8H6	yihI	P0A6P5	der
P24215	uxuA	Q6BF17	dgoD
P0AG55	rplF	P0A9P6	deaD
P0C0R7	rlmE	P0A9P6	deaD
P60422	rplB	P0A9P6	deaD
P60438	rplC	P0A9P6	deaD
P62399	rplE	P0A9P6	deaD
P0A7Z4	rpoA	P0A9P6	deaD
P75864	rlmL	P0A9P6	deaD
P37765	rluB	P0A9P6	deaD
P0A7Y0	rnc	P0A9P6	deaD
P37634	rlmJ	P0A9P6	deaD
P0A8T7	rpoC	P0A9P6	deaD
P0C018	rplR	P0A9P6	deaD
P60624	rplX	P0A9P6	deaD
P09155	rnd	P0A9P6	deaD
P0A7Y8	rnpA	P0A9P6	deaD
P21513	rne	P0A9P6	deaD
P0A7L0	rplA	P0A9P6	deaD
P0A7J3	rplJ	P0A9P6	deaD
P0AA10	rplM	P0A9P6	deaD
P0ADY3	rplN	P0A9P6	deaD
P0AG44	rplQ	P0A9P6	deaD
P02413	rplO	P0A9P6	deaD
P0A7M6	rpmC	P0A9P6	deaD
P0AG51	rpmD	P0A9P6	deaD
P60723	rplD	P0A9P6	deaD
P0A8V2	rpoB	P0A9P6	deaD
P0AA39	rluC	P0A9P6	deaD
P06992	rsmA	P0A9P6	deaD
P0A7W7	rpsH	P0A9P6	deaD
P76273	rsmF	P0A9P6	deaD
P46850	rtcB	P0A9P6	deaD
P0A847	tgt	P0A9P6	deaD
P21507	srmB	P0A9P6	deaD
P64610	yrbL	P0A9P6	deaD
P0ADZ0	rplW	P0A9P6	deaD
P21499	rnr	P0A9P6	deaD
P0AG67	rpsA	P0A9P6	deaD
P36929	rsmB	P0A9P6	deaD
P60240	rapA	P0A9P6	deaD
P15043	recQ	P0A9P6	deaD
P61175	rplV	P0A9P6	deaD
P0AGJ5	yfiF	P0A9P6	deaD
P36659	cbpA	P0A9P6	deaD
P0ABD5	accA	P0A9P6	deaD
P30871	ygiF	P0A9P6	deaD
P60782	plsY	P0ABK2	cydB
P0ADW3	yhcB	P0ABK2	cydB
P09158	speE	P00861	lysA
P77581	astC	P00861	lysA
P33022	rihB	P0ABP8	deoD
P77324	paoB	P0ABP8	deoD
P12758		P0ABP8	deoD
Q46800	xdhB	P0ABP8	deoD
P77463	ddpC	P77622	ddpF
P39453	torS	P0AEC8	dcuS
P0AEC5	barA	P0AEC8	dcuS
Q06065	atoC	P0AEC8	dcuS
P0AFR2	dauA	P0AEC8	dcuS
P0ABN9	dcuB	P0AEC8	dcuS
P38097	dgcE	P0AEC8	dcuS
P0A830	dctA	P0AEC8	dcuS
P77463	ddpC	P77308	ddpB
P77622	ddpF	P77308	ddpB
P13445	rpoS	Q47150	dinJ
P08390	usg	P0A9Q9	asd
P00968	carB	P0A9Q9	asd
P39453	torS	P76237	dgcJ
P0AEC5	barA	P76237	dgcJ
P0AG40	ribF	P37349	dhaM
P06959	aceF	P37349	dhaM
P60782	plsY	P37349	dhaM
P33020	yeiI	P37349	dhaM
P39453	torS	P0AAP1	dgcC
P39838	rcsD	P0AAP1	dgcC
P0AEC5	barA	P0AAP1	dgcC
P07363	cheA	P0AAP1	dgcC
P38097	dgcE	P0AAP1	dgcC
P39453	torS	P75908	dgcT
P39838	rcsD	P75908	dgcT
P0AEC5	barA	P75908	dgcT
P07363	cheA	P75908	dgcT
P38097	dgcE	P75908	dgcT
P39453	torS	P0AEE5	mglB
P18392	rstB	P0AEE5	mglB
P0AGI1	rbsC	P0AEE5	mglB
P39838	rcsD	P0AEE5	mglB
P0DMC5	rcsC	P0AEE5	mglB
P40719	qseC	P0AEE5	mglB
P0AEC5	barA	P0AEE5	mglB
P39453	torS	P31129	dgcZ
P39838	rcsD	P31129	dgcZ
P0AEC5	barA	P31129	dgcZ
P07363	cheA	P31129	dgcZ
P38097	dgcE	P31129	dgcZ
P0AGE9	sucD	P76251	dmlA
P0AFG3	sucA	P76251	dmlA
P06959	aceF	P76251	dmlA
P77129	ylbE	P76251	dmlA
P00579	rpoD	P15042	ligA
P04993	recD	P15042	ligA
P39453	torS	P0AA89	dosC
P39838	rcsD	P0AA89	dosC
P0AEC5	barA	P0AA89	dosC
P07363	cheA	P0AA89	dosC
P38097	dgcE	P0AA89	dosC
P21507	srmB	P45523	fkpA
P64610	yrbL	P45523	fkpA
P25888	rhlE	P45523	fkpA
P0A8J8	rhlB	P45523	fkpA
P0A9P6	deaD	P45523	fkpA
P0A940	bamA	P36683	acnB
P17411	chbF	P26612	amyA
P0A9J6	rbsK	P69503	apt
P0ABP8	deoD	P69503	apt
P02929	tonB	P06611	btuD
P23843	oppA	P06611	btuD
P0AGI1	rbsC	P06611	btuD
P0AFK6	potC	P06611	btuD
P31134	potG	P06611	btuD
P37624	rbbA	P06611	btuD
P10906	ugpE	P06611	btuD
P10905	ugpA	P06611	btuD
P33362	yehZ	P06611	btuD
P33913	yejA	P06611	btuD
P45767	yhdX	P06611	btuD
P0ABL8	ccmB	P06611	btuD
P33931	ccmA	P06611	btuD
P76149	sad	P18335	argD
Q46908	ygcR	P18335	argD
P76217	astD	P18335	argD
P00861	lysA	P18335	argD
P76373	ugd	P0AFT5	btsR
P0AFT5	btsR	P0AD14	btsS
P02929	tonB	P06129	btuB
P75733	chiP	P06129	btuB
P06611	btuD	P06129	btuB
P77526	yfcG	P06610	btuE
P76251	dmlA	P11447	argH
P77690	arnB	P77757	arnC
P76373	ugd	Q47377	arnE
P0A8V2	rpoB	P23325	arpA
P64610	yrbL	P23325	arpA
P60240	rapA	P23325	arpA
P0A7G6	recA	P23325	arpA
P61175	rplV	P23325	arpA
P56258	wecF	P23325	arpA
P76585	yphG	P23325	arpA
P0A9J8	pheA	P30859	artI
P0A9J8	pheA	P30860	artJ
P30859	artI	P30860	artJ
P23843	oppA	P0AE30	artM
P0AGI1	rbsC	P0AE30	artM
P0AFK6	potC	P0AE30	artM
P31134	potG	P0AE30	artM
P37624	rbbA	P0AE30	artM
P10906	ugpE	P0AE30	artM
P10905	ugpA	P0AE30	artM
P33362	yehZ	P0AE30	artM
P33913	yejA	P0AE30	artM
P45767	yhdX	P0AE30	artM
P0ABL8	ccmB	P0AE30	artM
P33931	ccmA	P0AE30	artM
P06611	btuD	P0AE30	artM
P30859	artI	P0AE30	artM
P30860	artJ	P0AE30	artM
P23843	oppA	P0AAF6	artP
P0AGI1	rbsC	P0AAF6	artP
P0AFK6	potC	P0AAF6	artP
P31134	potG	P0AAF6	artP
P37624	rbbA	P0AAF6	artP
P10906	ugpE	P0AAF6	artP
P10905	ugpA	P0AAF6	artP
P33362	yehZ	P0AAF6	artP
P33913	yejA	P0AAF6	artP
P45767	yhdX	P0AAF6	artP
P0ABL8	ccmB	P0AAF6	artP
P33931	ccmA	P0AAF6	artP
P06611	btuD	P0AAF6	artP
P30859	artI	P0AAF6	artP
P30860	artJ	P0AAF6	artP
P0AE30	artM	P0AAF6	artP
P23843	oppA	P0AE34	artQ
P0AGI1	rbsC	P0AE34	artQ
P0AFK6	potC	P0AE34	artQ
P31134	potG	P0AE34	artQ
P37624	rbbA	P0AE34	artQ
P10906	ugpE	P0AE34	artQ
P10905	ugpA	P0AE34	artQ
P33362	yehZ	P0AE34	artQ
P33913	yejA	P0AE34	artQ
P45767	yhdX	P0AE34	artQ
P0ABL8	ccmB	P0AE34	artQ
P33931	ccmA	P0AE34	artQ
P06611	btuD	P0AE34	artQ
P30859	artI	P0AE34	artQ
P30860	artJ	P0AE34	artQ
P0AE30	artM	P0AE34	artQ
P0AAF6	artP	P0AE34	artQ
Q46829	bglA	P24240	ascB
P17411	chbF	P24240	ascB
P00805	ansB	P00963	asnA
P09546	putA	P0A6E4	argG
P00968	carB	P0A6E4	argG
P23908	argE	P0A6E4	argG
P39453	torS	P02924	araF
P18392	rstB	P02924	araF
P39838	rcsD	P02924	araF
P0DMC5	rcsC	P02924	araF
P40719	qseC	P02924	araF
P0AEC5	barA	P02924	araF
P02924	araF	P0AAF3	araG
P02929	tonB	P37028	btuF
P06611	btuD	P37028	btuF
P06129	btuB	P37028	btuF
P27253	scpA	P27254	argK
P0A9J8	pheA	P0A6D3	aroA
P07639	aroB	P0A6D7	aroK
P0A6E1	aroL	P0A6D7	aroK
P0A9J8	pheA	P0A6D7	aroK
P0A7R5	rpsJ	P31551	caiD
P02359	rpsG	P31551	caiD
P39453	torS	P31551	caiD
P09546	putA	P31551	caiD
P39838	rcsD	P31551	caiD
P0DMC5	rcsC	P31551	caiD
P07003	poxB	P31551	caiD
[truncated: 18,217 more rows]

## Sheet: CoevPlus
UniprotID_p1	GeneName_p1	UniprotID_p2	GeneName_p2
P0AG55	rplF	Q2EEQ2	ykgO
P0AG55	rplF	P0A7Q6	rpmJ
P60422	rplB	P0AG48	rplU
P60438	rplC	P0AG48	rplU
P0A7L3	rplT	P0AG48	rplU
P0A7L3	rplT	P0A7N4	rpmF
P0A7Q6	rpmJ	P0A7N4	rpmF
P60422	rplB	P0A7Z4	rpoA
P0A7Q6	rpmJ	P0A7Q1	rpmI
P0A7N4	rpmF	P0A7L8	rpmA
P0A7Q1	rpmI	P0A7L8	rpmA
P0ADY7	rplP	P0A7R5	rpsJ
P0A7Z4	rpoA	P0A7R5	rpsJ
P0A800	rpoZ	P0A7Y0	rnc
P0A7Z4	rpoA	P0A8T7	rpoC
P0A7L8	rpmA	P0C018	rplR
P0A800	rpoZ	P0A7K2	rplL
P33643	rluD	P42596	rlmG
P0A7R5	rpsJ	P0A7Y8	rnpA
P0ADY7	rplP	P68919	rplY
P0C0R7	rlmE	P0A7L0	rplA
P60422	rplB	P0A7L0	rplA
P62399	rplE	P0A7L0	rplA
P0A7N9	rpmG	P0A7L0	rplA
P0ADY7	rplP	P0A7J3	rplJ
P0A7K2	rplL	P0A7J3	rplJ
P0A7L0	rplA	P0A7J3	rplJ
P60438	rplC	P0AA10	rplM
P0A7L3	rplT	P0AA10	rplM
P0A7L0	rplA	P0AA10	rplM
P60438	rplC	P0ADY3	rplN
P0ADY7	rplP	P0ADY3	rplN
P0A7Q1	rpmI	P0ADY3	rplN
P0A7R5	rpsJ	P0ADY3	rplN
P60438	rplC	P0AG44	rplQ
P0A7N4	rpmF	P0AG44	rplQ
P0A7R5	rpsJ	P0AG44	rplQ
P36979	rlmN	P0AG44	rplQ
P0ADR6	rlmM	P0AG44	rplQ
P0AG48	rplU	P02413	rplO
P0A7Z4	rpoA	P02413	rplO
P0A7Q1	rpmI	P02413	rplO
P0A7R1	rplI	P0A7M2	rpmB
P0ADY3	rplN	P0A7M2	rpmB
P0A7R1	rplI	P0A7N1	ykgM
P62399	rplE	P0A7M9	rpmE
P0AG55	rplF	P60723	rplD
P0A7R1	rplI	P60723	rplD
P0A7L3	rplT	P60723	rplD
P0A7N9	rpmG	P60723	rplD
P0A7P5	rpmH	P60723	rplD
P0A7L8	rpmA	P60723	rplD
P0ADR6	rlmM	P60723	rplD
P0A7J3	rplJ	P60723	rplD
P0AG44	rplQ	P60723	rplD
P02413	rplO	P60723	rplD
P0A7Z4	rpoA	P0A8V2	rpoB
P0A8T7	rpoC	P0A8V2	rpoB
P60624	rplX	P0AA39	rluC
P0AG44	rplQ	P0AA39	rluC
P46187	rseC	P0A766	rsxA
P0ADY7	rplP	P02359	rpsG
P0A7Q1	rpmI	P02359	rpsG
P0A7R5	rpsJ	P02359	rpsG
P0A7K2	rplL	P02359	rpsG
P68919	rplY	P02359	rpsG
P0A7N4	rpmF	P0A7W7	rpsH
P0A7Q1	rpmI	P0A7W7	rpsH
P0A877	trpA	P0A879	trpB
P67087	rsmI	Q57261	truD
P60723	rplD	P14294	topB
P10100	rlpA	P0A855	tolB
P0A7R5	rpsJ	P0A858	tpiA
P0A855	tolB	P0ABV6	tolR
P0ABU9	tolQ	P0ABV6	tolR
P0ADY3	rplN	P0AGA2	secY
P0AGA2	secY	P0AG90	secD
P0A766	rsxA	P76182	rsxD
P77499	sufC	P76194	sufE
P75851	ssuC	P75853	ssuA
P75851	ssuC	P0AAI1	ssuB
P0A7M2	rpmB	P26602	ubiC
P0A7L3	rplT	P0AE48	ytfP
P0A800	rpoZ	P0ADZ0	rplW
P0A7M6	rpmC	P0ADZ0	rplW
P60723	rplD	P0ADZ0	rplW
P0AFX7	rseA	P0AGB6	rpoE
P60723	rplD	P00579	rpoD
P60723	rplD	P0AG40	ribF
P0A7H3	recO	P0A7H6	recR
P0ADY7	rplP	P0A7I0	prfA
P05824	recN	P0A7I0	prfA
P0A7P5	rpmH	P32156	rhaM
P0A8V2	rpoB	P0A7E5	pyrG
P23843	oppA	P0AFH2	oppB
P0AFH2	oppB	P0AFH6	oppC
P0AFH6	oppC	P77737	oppF
P0A7U3	rpsS	P0A7X6	rimM
P32156	rhaM	P32171	rhaB
P0A7I7	ribA	P0A7J0	ribB
P60390	rsmH	P0A7G2	rbfA
P00579	rpoD	P0A7G6	recA
P33596	recX	P0A7G6	recA
P0A7E9	pyrH	P0A7G6	recA
P60438	rplC	P0A7K6	rplS
P0ADY3	rplN	P0A7K6	rplS
P64588	yqjI	P0A7K6	rplS
P0A7N4	rpmF	P61175	rplV
P0A7Q1	rpmI	P61175	rplV
P0AG44	rplQ	P61175	rplV
P60723	rplD	P61175	rplV
P0A698	uvrA	P0A8F8	uvrB
P06959	aceF	P03018	uvrD
P0A8F8	uvrB	P03018	uvrD
P10906	ugpE	P10905	ugpA
P0ACM2	rspR	P24215	uxuA
P0ADA1	tesA	P0A9T8	ybbA
P0ADA1	tesA	P77504	ybbP
P0A9T8	ybbA	P77504	ybbP
P33349	yehM	P33352	yehP
P33913	yejA	P0AFU0	yejB
Q46907	ygcQ	Q46908	ygcR
P45766	yhdW	P45767	yhdX
P0AAB2	wzb	P76387	wzc
P77252	ykgE	P77536	ykgF
P0A8P6	xerC	P0AD40	ypeB
P0A7K2	rplL	P0AFP2	atl
P0A7L0	rplA	P0AFP2	atl
P36979	rlmN	P07639	aroB
P76458	atoD	P76459	atoA
P0ABA0	atpF	P0AB98	atpB
P69490	ccmE	P0ABL8	ccmB
P0ABB0	atpA	P0ABA6	atpG
P0ABB4	atpD	P0ABA6	atpG
P0ABU9	tolQ	P0ABA4	atpH
P0ABB0	atpA	P0ABA4	atpH
P0ABA0	atpF	P0ABA4	atpH
P0AG40	ribF	P0A6E6	atpC
P0A887	ubiE	P0A6E6	atpC
P0ABA6	atpG	P0A6E6	atpC
P0ABL8	ccmB	P33931	ccmA
P69490	ccmE	P0ABM1	ccmC
P0ABL8	ccmB	P0ABM1	ccmC
P0ABB0	atpA	P68699	atpE
P0AB98	atpB	P68699	atpE
P0A6E6	atpC	P68699	atpE
P07650	deoA	P0A940	bamA
P03018	uvrD	P0ABH9	clpA
P0C0R7	rlmE	P00968	carB
P0A7R5	rpsJ	P00968	carB
P76256	tsaB	P0A6I3	coaA
P0A7I7	ribA	P0A6I3	coaA
P0A7X6	rimM	P0A8Q6	clpS
P0ABH9	clpA	P0A8Q6	clpS
P0CG19	rph	P24224	acpS
P0ABA6	atpG	P0A6F5	groL
P0AB65	yccX	P08365	chpS
P0A8F8	uvrB	P76213	cho
P0AEH1	rseP	P30871	ygiF
P31224	acrB	P0AE06	acrA
P24177	acrD	P0AE06	acrA
P0AE56	bfd	P0ABD3	bfr
Q06065	atoC	P0AE67	cheY
P0AE67	cheY	P0A964	cheW
P0A964	cheW	P07363	cheA
P0A800	rpoZ	P0A6K3	def
P33596	recX	P0ABS1	dksA
P68646	fixX	P68644	fixC
P68206	yjbJ	P06966	dicA
P77463	ddpC	P77622	ddpF
P77463	ddpC	P77308	ddpB
P06612	topA	P15042	ligA
P07364	cheR	P69503	apt
P76216	astB	P18335	argD
P0AFT5	btsR	P0AD14	btsS
Q47083	cbl	P0A8S1	argP
P0A7K2	rplL	P0A6D0	argR
P0A7M6	rpmC	P0A6D0	argR
P0AE30	artM	P0AAF6	artP
P0AAF6	artP	P0AE34	artQ
P27253	scpA	P27254	argK
P77790	ddpX	P0A6D7	aroK
P0AAF3	araG	P0AE26	araH
P0A6C8	argB	P11446	argC
Q46896	ygbT	P45956	ygbF
P45956	ygbF	Q46898	casD
P45956	ygbF	Q46897	casE
Q46898	casD	Q46897	casE
Q46898	casD	Q46899	casC
Q46897	casE	Q46899	casC
P06611	btuD	P06609	btuC
P37028	btuF	P06609	btuC
P77581	astC	P0AE37	astA
P0A7J3	rplJ	P05637	apaH
P0A7W7	rpsH	P05637	apaH
P0AED0	uspA	P0AC28	ygfA
P0A8Q6	clpS	P0A9Q5	accD
P0ABD5	accA	P0A9Q5	accD
P0A7K2	rplL	P75990	bluF
P0AFW2	rmf	P0ABE2	bolA
Q57261	truD	P36548	amiA
P0A7N9	rpmG	P0A901	blc
P0A7R5	rpsJ	P0A901	blc
P0AFT8	yeiW	P0A901	blc
P32721	alsA	P32720	alsC
P39265	alsB	P32720	alsC
P26458	appB	P26459	appC
P15770	aroE	P05052	appY
P0AE67	cheY	P0AEC3	arcB
Q2EEQ2	ykgO	P40711	arfB
P0A9Q5	accD	P24182	accC
P21515	acpH	P0A6A8	acpP
P62672	apaG	P0A6A8	acpP
P27431	roxA	P29012	dadX
P24180	acrE	P24181	acrF
P76556	eutP	P63746	eutS
P0A7R5	rpsJ	P0ABU7	exbB
P0A855	tolB	P0ABV2	exbD
P02359	rpsG	P0A6N8	yeiP
P0A7L0	rplA	P0A6N4	efp
P02359	rpsG	P0A6N4	efp
P05637	apaH	P0A6N4	efp
P0A8N7	epmA	P0A6N4	efp
P0ABV2	exbD	P0A6N4	efp
P0AFX7	rseA	P0AB01	elyC
P36999	rlmA	P23895	emrE
P0A6P5	der	P06616	era
P0AB24	efeO	P31545	efeB
P02359	rpsG	P0A9R7	ftsE
P61175	rplV	P0A9R7	ftsE
P13016	ampD	P0A9A9	fur
P04994	xseA	P0A8G9	xseB
P60723	rplD	P0CE47	tufA
P0A9R7	ftsE	P0CE47	tufA
P0AG55	rplF	P0CE48	tufB
P25549	aslA	P0CE48	tufB
P0A940	bamA	P0ABH0	ftsA
P0ABA0	atpF	P0AC30	ftsX
P0A6A8	acpP	P0AC30	ftsX
P37690	envC	P0AC30	ftsX
P0A9R7	ftsE	P0AC30	ftsX
P0ABH0	ftsA	P0AC30	ftsX
P0AEJ6	eutB	P19636	eutC
P0AFW2	rmf	P08192	folC
P0A7H3	recO	P77774	bamB
P0A9T8	ybbA	P0A937	bamE
P0A9A9	fur	P0A937	bamE
P0AFX7	rseA	P12995	bioA
P75726	citF	P69330	citD
P75726	citF	P0A9I1	citE
P69330	citD	P0A9I1	citE
P69330	citD	P0A6G5	citX
P77231	citG	P0A6G5	citX
P16700	cysP	P16701	cysU
P0AG78	sbp	P0AEB0	cysW
P16700	cysP	P0AEB0	cysW
P0A855	tolB	P0A6J3	cysZ
P0A901	blc	P0A9X9	cspA
P0ACZ8	cusR	P77485	cusS
P0AEC3	arcB	P08368	creB
P0AC16	folB	P52106	csgD
P0AE98	csgF	P0AEA2	csgG
P17846	cysI	P38038	cysJ
P23845	cysN	P21156	cysD
P68919	rplY	P0A976	cspF
P0C018	rplR	P69913	csrA
P0A7M2	rpmB	P69913	csrA
P0AGJ5	yfiF	P69913	csrA
P0ACF4	hupB	P69913	csrA
P0ABE2	bolA	P69913	csrA
P0A6G7	clpP	P0A6H1	clpX
P00968	carB	P0A6F1	carA
P0AE08	ahpC	P35340	ahpF
P0AG44	rplQ	P45955	cpoB
P06136	ftsQ	P0A6S5	ftsB
P0A7G6	recA	P0A9A6	ftsZ
P0ABH0	ftsA	P0A9A6	ftsZ
P0A7P5	rpmH	P0ACC3	erpA
P0A7M2	rpmB	P0A6Q3	fabA
P0A7L0	rplA	P0A6Q6	fabZ
P60723	rplD	P0A6Q6	fabZ
P0A8Q6	clpS	P0A6Q6	fabZ
P0A7M9	rpmE	P0AEJ8	eutN
P63746	eutS	P0AEJ8	eutN
P76540	eutK	P0AEJ8	eutN
P0ABF4	eutM	P0AEJ8	eutN
P0AEJ8	eutN	P77445	eutE
P0A6A8	acpP	P0AAI5	fabF
P0AE39	ypdB	P0ACZ2	etp
P0AD40	ypeB	P0ACZ2	etp
Q46925	csdA	P0AGF2	csdE
P16701	cysU	P16676	cysA
P0AEB0	cysW	P16676	cysA
P26646	acuI	P76113	curA
P0ABK2	cydB	P0ABJ9	cydA
P0AE06	acrA	P77239	cusB
P38054	cusA	P77239	cusB
P0ABK2	cydB	P29018	cydD
P26459	appC	P29018	cydD
P0ABJ9	cydA	P29018	cydD
P0AE82	cpxA	P0AE88	cpxR
P0AFP2	atl	P0ACF0	hupA
P05637	apaH	P0ACF0	hupA
P76491	yfbR	P0ACF0	hupA
P0A6Q3	fabA	P0ACF0	hupA
P23845	cysN	P0A6J1	cysC
P0ABI8	cyoB	P0ABJ1	cyoA
P0ABJ6	cyoD	P0ABJ1	cyoA
P0A6A8	acpP	P0ABJ3	cyoC
P0ABI8	cyoB	P0ABJ3	cyoC
P0ABJ6	cyoD	P0ABJ3	cyoC
P0A7G2	rbfA	P0A6M2	dsbB
P33927	ccmF	P0AA86	dsbE
P55135	rlmD	P0ABX2	flgC
P0ABX2	flgC	P0ABW9	flgB
P75936	flgD	P75937	flgE
P0A9X9	cspA	P77202	dsbG
P0ABX2	flgC	P25798	fliF
P0ABW9	flgB	P25798	fliF
P25798	fliF	P0ABZ1	fliG
P0AE67	cheY	P31068	fliH
P0ABX2	flgC	P31068	fliH
P75936	flgD	P52612	fliI
P25798	fliF	P52612	fliI
P31068	fliH	P52612	fliI
P0A7U3	rpsS	P0AEG4	dsbA
P0ADY3	rplN	P29744	flgL
P52612	fliI	P29744	flgL
P0AFH2	oppB	P0AEG1	dppC
P0AEF8	dppB	P0AEG1	dppC
P0AEF8	dppB	P0AAG0	dppD
P0AEG1	dppC	P37313	dppF
P33135	fliR	P76299	flhB
P0ABY7	flhC	P0A8S9	flhD
P0ABW9	flgB	P0A8T5	fliE
P33135	fliR	P0A8T5	fliE
P07330	cheB	P52613	fliJ
P0ABX2	flgC	P52613	fliJ
P75936	flgD	P52613	fliJ
P76298	flhA	P52613	fliJ
P52613	fliJ	P0ABX8	fliL
P0ABZ1	fliG	P06974	fliM
P52613	fliJ	P06974	fliM
P0ABX2	flgC	P15070	fliN
P0ABZ1	fliG	P15070	fliN
P31068	fliH	P15070	fliN
P29744	flgL	P15070	fliN
P76299	flhB	P15070	fliN
P06974	fliM	P15070	fliN
P0A964	cheW	P0AC05	fliP
P0ABW9	flgB	P0AC05	fliP
P25798	fliF	P0AC05	fliP
P0ABZ1	fliG	P0AC05	fliP
P33135	fliR	P0AC05	fliP
P0A8T5	fliE	P0AC05	fliP
P52613	fliJ	P0AC05	fliP
P06974	fliM	P0AC05	fliP
P0AC05	fliP	P0AC07	fliQ
P0A7M9	rpmE	P26608	fliS
P0AAZ4	rarA	P06710	dnaX
P0ADX9	rsmD	P0ABY4	fldB
P0ABX2	flgC	P75938	flgF
P06974	fliM	P75938	flgF
P75933	flgA	P75938	flgF
P0AEF8	dppB	P23847	dppA
P0AEG1	dppC	P23847	dppA
P0A8Q6	clpS	P0AEM6	fliA
P0ABX2	flgC	P0AEM6	fliA
P76298	flhA	P0AEM6	fliA
P76299	flhB	P0AEM6	fliA
P06974	fliM	P0AEM6	fliA
P15070	fliN	P0AEM6	fliA
P26608	fliS	P0AEM6	fliA
P0AEM4	flgM	P0AEM6	fliA
P0ABW9	flgB	P04949	fliC
P26608	fliS	P04949	fliC
P76578	yfhM	P24216	fliD
P0ABX2	flgC	P24216	fliD
P76298	flhA	P24216	fliD
P76299	flhB	P24216	fliD
P06974	fliM	P24216	fliD
P0AC05	fliP	P24216	fliD
P04949	fliC	P24216	fliD
P0AEK0	exoX	P10443	dnaE
P15070	fliN	P0ABX5	flgG
P0ABX2	flgC	P33235	flgK
P75937	flgE	P33235	flgK
P25798	fliF	P33235	flgK
P31068	fliH	P33235	flgK
P29744	flgL	P33235	flgK
P15070	fliN	P33235	flgK
P0AC05	fliP	P33235	flgK
P75938	flgF	P33235	flgK
P0A7N9	rpmG	P03007	dnaQ
P0A7L0	rplA	P03007	dnaQ
P0A873	trmD	P03007	dnaQ
P0A7K6	rplS	P03007	dnaQ
P10443	dnaE	P03007	dnaQ
P0A6S3	flgI	P0A6S0	flgH
P0AEM4	flgM	P0A6S0	flgH
P0A972	cspE	P0A988	dnaN
P06710	dnaX	P0A988	dnaN
P03007	dnaQ	P0A988	dnaN
P0A7L8	rpmA	P61949	fldA
P0A988	dnaN	P61949	fldA
P77774	bamB	P0A903	bamC
P0ABD5	accA	P0ABD8	accB
P24182	accC	P0ABD8	accB
P76290	cmoA	P76291	cmoB
P39163	chaC	P0AE52	bcp
P63883	amiC	P66948	bepA
P0ABA0	atpF	P0ABG1	cdsA
P69228	baeR	P30847	baeS
P0A940	bamA	P0AC02	bamD
P0A937	bamE	P0AC02	bamD
P30843	basR	P30844	basS
P0A894	rapZ	P0A6F9	groS
P0A6F5	groL	P0A6F9	groS
P0ABU7	exbB	P0A6F9	groS
P0A988	dnaN	P0A6F9	groS
P0AE67	cheY	P0A9H9	cheZ
P76290	cmoA	P0A9H9	cheZ
P0DMC7	rcsB	P33647	chpB
P08365	chpS	P33647	chpB
P05824	recN	P10121	ftsY
P0ABG4	ftsW	P0AD68	ftsI
P0AD68	ftsI	P46889	ftsK
P23876	fepD	P23878	fepC
P0AFK6	potC	P37009	fbpC
P75681	afuB	P37009	fbpC
P0AAJ5	fdoH	P32176	fdoG
P37028	btuF	P15029	fecD
P15031	fecE	P15029	fecD
P06992	rsmA	P0A6T9	gcvH
P27248	gcvT	P0A6T9	gcvH
P77544	yfcF	P0ACA7	gstB
P0AG51	rpmD	P37005	lasT
P0A6A6	leuC	P30126	leuD
P22731	livF	P0AEX7	livH
P0AEX7	livH	P22729	livM
P15070	fliN	Q47154	lafU
P0AEX7	livH	P0AD96	livJ
P0AEX7	livH	P04816	livK
P0A7R1	rplI	P0A9M0	lon
P0A7L3	rplT	P0A9M0	lon
P0AG48	rplU	P61316	lolA
P0A6U5	rsmG	P61316	lolA
P60438	rplC	P0A722	lpxA
P0A6A8	acpP	P0A722	lpxA
P0ADV9	lptC	P0ADV1	lptA
P0A7Z4	rpoA	P23930	lnt
P00363	frdA	P0AC47	frdB
P0A8Q3	frdD	P0A8Q0	frdC
P61316	lolA	P61320	lolB
P22729	livM	P0A9S7	livG
P0ADY7	rplP	P0A705	infB
P46889	ftsK	P0A705	infB
P0A7R5	rpsJ	P0A707	infC
P0A9J0		P0A707	infC
P0A7W7	rpsH	P0A707	infC
P08622	dnaJ	P31554	lptD
P0A722	lpxA	P21645	lpxD
P77395	cnoX	P0A9V1	lptB
P0ADC6	lptG	P0A9V1	lptB
P0AF98	lptF	P0A9V1	lptB
P0AFG3	sucA	P0AFG6	sucB
P0A9P0	lpdA	P0AFG6	sucB
P0AFH2	oppB	P76027	oppD
P0AAI9	fabD	P27247	plsX
P76343	msrQ	P76342	msrP
P0AA16	ompR	P08400	phoR
P06959	aceF	P0AFG8	aceE
P0A6F5	groL	P0AFG8	aceE
P76342	msrP	P0AFH0	ogt
P69490	ccmE	P32712	nrfG
P61517	can	P32712	nrfG
P0ACZ4	evgA	P0AFB8	glnG
P0ABM5	ccmD	P32711	nrfF
P0AA86	dsbE	P32711	nrfF
P32712	nrfG	P32711	nrfF
P0AFB8	glnG	P0AFB5	glnL
P0A7Q1	rpmI	P11350	narI
P0ABL3	napB	P0ABL5	napC
P77858	hyfC	P0AFC3	nuoA
P0AFE4	nuoK	P0AFC3	nuoA
P08400	phoR	P0AFJ5	phoB
P0AFG3	sucA	P0A9K1	phoH
P77434	alaC	P45548	php
Q46890	otnC	Q46889	otnK
P31678	otsB	P31677	otsA
Q46920	queF	P05041	pabB
P0A855	tolB	P0A912	pal
P61316	lolA	P0A912	pal
P61320	lolB	P0A912	pal
P0AFC3	nuoA	P0AFE8	nuoM
P0ADY7	rplP	P0AFG0	nusG
P0A809	ruvA	P0A9K3	ybeZ
P03018	uvrD	P0A9K3	ybeZ
P32712	nrfG	P0AFC7	nuoB
P0AFC3	nuoA	P0AFC7	nuoB
P18956	ggt	P33021	nupX
P0A7Y0	rnc	P0AC65	nrdH
P0A862	tpx	P0AC65	nrdH
P0A7E9	pyrH	P0A6P1	tsf
P0CE47	tufA	P0A6P1	tsf
P0CE48	tufB	P0A6P1	tsf
P0A940	bamA	P0ABC7	hflK
P45955	cpoB	P0ABC7	hflK
P0A7Z4	rpoA	P0A6W5	greA
P0A8T7	rpoC	P0A6W5	greA
P0A8V2	rpoB	P0A6W5	greA
P0A894	rapZ	P0A6W5	greA
P77808	yfaY	P0A6W5	greA
P0A894	rapZ	P0A6S7	gpsA
P0A988	dnaN	P0AFX0	hpf
P0A7J3	rplJ	P0A6L9	hscB
P0A6Z1	hscA	P0A6L9	hscB
P0ABZ1	fliG	P0A6Z3	htpG
P0A7K2	rplL	P0A6H5	hslU
P21513	rne	P04968	ilvA
P16703	cysM	P04968	ilvA
P0A7L3	rplT	P0A700	hypA
P0A7L8	rpmA	P0A700	hypA
P75681	afuB	P0A700	hypA
P0AAN3	hypB	P0A700	hypA
P0AFC7	nuoB	P16432	hycF
P0A7K2	rplL	P0AAM3	hypC
P0A7M2	rpmB	P0AAM3	hypC
P0A858	tpiA	P0AAM3	hypC
P37623	acpT	P0AAM3	hypC
P15034	pepP	P0A9W6	ibaG
P23836	phoP	P0C058	ibpB
P77858	hyfC	P77329	hyfG
P27247	plsX	P60546	gmk
P07000	pldB	P0C054	ibpA
P0A9G4	cueR	P23331	tdk
P06136	ftsQ	P0A6X7	ihfA
P0AEG6	dsbC	P0A6X7	ihfA
P69488	cutA	P0C0L9	iscX
P08142	ilvB	P0ADF8	ilvN
Q79E92	ykgN	P19768	insJ
P19768	insJ	P19769	insK
P24218	intD	P32053	intA
P0C0L9	iscX	P0AAC8	iscA
P24218	intD	P76542	intZ
P27838	cyaY	P0AD57	ispB
P07650	deoA	P37651	bcsZ
P0ABJ6	cyoD	P0ACE7	hinT
P0A9N8	nrdG	P0ACE7	hinT
P0AGB6	rpoE	P64634	hofN
P0AB83	nth	P64634	hofN
P06968	dut	P64634	hofN
P0A7N9	rpmG	P28630	holA
P61175	rplV	P28630	holA
P45475	yhbV	P26281	folK
P06996	ompC	P26281	folK
P03960	kdpB	P03959	kdpA
P0ADY3	rplN	P0ACG8	hslR
P61175	rplV	P0ACG8	hslR
P0ACJ8	crp	P0ACG8	hslR
P60438	rplC	P0A7B8	hslV
P0A9M0	lon	P0A7B8	hslV
P0A6H5	hslU	P0A7B8	hslV
P21866	kdpE	P21865	kdpD
P03959	kdpA	P21865	kdpD
P0AB91	aroG	P62707	gpmA
P15034	pepP	P09372	grpE
P33235	flgK	P09372	grpE
P0A6Z1	hscA	P09372	grpE
P75798	gsiC	P75799	gsiD
P0AG55	rplF	P25519	hflX
P0ABV2	exbD	P69441	adk
P60664	hisF	P60595	hisH
P09551	argT	P52094	hisQ
P52094	hisQ	P0AEU0	hisJ
P36645	hofB	P36646	hofC
P37634	rlmJ	P28905	holC
P0A7K2	rplL	P28905	holC
P0A7M6	rpmC	P28905	holC
P60723	rplD	P28905	holC
P61175	rplV	P28905	holC
P04995	sbcB	P28905	holC
P0A780	nusB	P28905	holC
P77580	mhpF	P51020	mhpE
P0A7L0	rplA	P28631	holB
P0A988	dnaN	P28631	holB
P16692	phnP	P28631	holB
P0AE12	amn	P0A6V8	glk
P27434	rodZ	P0A9Z1	glnB
P0AER3	gltJ	P0AAG3	gltL
P0AAF6	artP	P0AER5	gltK
P0AAG3	gltL	P0AER5	gltK
P0AE34	artQ	P10346	glnQ
P0A6K3	def	P0AB20	hspQ
P0AEL0	fdoI	P0AAJ8	hybA
P77858	hyfC	P77668	hyfI
P16432	hycF	P77668	hyfI
P77329	hyfG	P77668	hyfI
P0AFC3	nuoA	P16430	hycD
P77668	hyfI	P16430	hycD
P0AFC3	nuoA	P16433	hycG
P16431	hycE	P16433	hycG
P16432	hycF	P16433	hycG
P0AAN3	hypB	P24192	hypD
P0AAM3	hypC	P24192	hypD
P0A703	hybF	P24193	hypE
P0A700	hypA	P24193	hypE
P0AAM3	hypC	P24193	hypE
P24192	hypD	P24193	hypE
P0AEU3	hisM	P07109	hisP
P52094	hisQ	P07109	hisP
P31697	fimC	P30130	fimD
P77215	rhmD	P0AES2	gudD
P0A6I6	coaD	P25746	hflD
P76106	hicA	P67697	hicB
P76340	hprR	P76339	hprS
P60723	rplD	P04951	kdsB
P0ACF4	hupB	P04951	kdsB
P0AEN4	ftsL	P0ABZ4	kdsC
P0AFC7	nuoB	P77423	hyfH
P23481	hyfA	P77423	hyfH
P77668	hyfI	P77423	hyfH
Q79E92	ykgN	P0AAM7	hybG
P0AAM1	hyaC	P0AAM7	hybG
P0A703	hybF	P0AAM7	hybG
P0A703	hybF	P30131	hypF
P0A700	hypA	P30131	hypF
P24193	hypE	P30131	hypF
P0AAM7	hybG	P30131	hypF
P0AAK7	nrfC	P11349	narH
P11350	narI	P11349	narH
P11350	narI	P0AF26	narJ
P08368	creB	P0AF28	narL
P11349	narH	P0AF28	narL
P0AAK7	nrfC	P19318	narY
P19318	narY	P19319	narZ
P0AC38	aspA	P0A759	nagB
P75958	lolE	P75957	lolD
P0ADC3	lolC	P75957	lolD
P0ADV1	lptA	P0ADC1	lptE
P31554	lptD	P0ADC1	lptE
P0A6G7	clpP	P76506	mlaA
P76506	mlaA	P0ADV7	mlaC
P0ADV7	mlaC	P64604	mlaD
P64604	mlaD	P64606	mlaE
P0ADV7	mlaC	P63386	mlaF
P64606	mlaE	P63386	mlaF
P69503	apt	P0AF06	motB
P33235	flgK	P0AF06	motB
P09348	motA	P0AF06	motB
P0AAZ4	rarA	P37773	mpl
P0AFH6	oppC	P77348	mppA
P60624	rplX	P39411	yjjX
P19318	narY	P0AF32	narV
P0ABL3	napB	P33937	napA
P0A8P3	yggX	P0A752	nadD
P33937	napA	P37758	narU
P0AEF8	dppB	P33590	nikA
P75798	gsiC	P33590	nikA
P0C960	emtA	P23898	nlpC
P06722	mutH	P23367	mutL
P28631	holB	P23367	mutL
P0A9Q1	arcA	P31802	narP
P08368	creB	P31802	narP
P69228	baeR	P31802	narP
P0AC65	nrdH	P0A772	nrdI
P76578	yfhM	P31806	nnr
P42641	obgE	P31806	nnr
P11350	narI	P09152	narG
P11349	narH	P09152	narG
P0AF26	narJ	P09152	narG
P0ABS1	dksA	P0ADA3	nlpD
P0AFB1	nlpI	P0ADA3	nlpD
P0A9A2	ftnB	P33593	nikD
P33594	nikE	P0AFA9	nikC
P17410	chbR	P76241	nimR
P77570	anmK	P20083	parE
P0A707	infC	P20083	parE
P0A7R1	rplI	P02918	mrcA
P60422	rplB	P02918	mrcA
P21499	rnr	P31133	potF
P0A6F9	groS	P31133	potF
P31134	potG	P31135	potH
P31133	potF	P31135	potH
P76938	epmC	P33644	yfiH
P68767	pepA	P15288	pepD
P0AC53	zwf	P15288	pepD
P0AFK6	potC	P69874	potA
P37009	fbpC	P0AFK4	potB
P69874	potA	P0AFK4	potB
P31134	potG	P0AFL1	potI
P31133	potF	P0AFL1	potI
P31135	potH	P0AFL1	potI
P0AFK6	potC	P0AFK9	potD
P0AFK4	potB	P0AFK9	potD
P0A9K1	phoH	P39199	prmB
P0A7I0	prfA	P0ACC1	prmC
P23331	tdk	P0A6G3	pncC
P0AAM7	hybG	P76078	paaB
P77324	paoB	P77165	paoA
P77324	paoB	P77489	paoC
P77165	paoA	P77489	paoC
P20083	parE	P0AFI2	parC
P67095	yfcE	P0C037	ppnP
P69801	manY	P69805	manZ
P42910	agaC	P42911	agaD
P42905	agaW	P42911	agaD
P30844	basS	P76079	paaC
P76077	paaA	P76079	paaC
P76078	paaB	P76079	paaC
P76078	paaB	P76080	paaD
P76079	paaC	P76080	paaD
P0C054	ibpA	P75794	ybiY
P0A873	trmD	P0A8T1	prmA
P16679	phnL	P0AAH0	pstB
P41409	rihA	P33025	psuG
P24171	dcp	P33025	psuG
P32674	pflD	P32675	pflC
P0C054	ibpA	P37188	gatB
P69828	gatA	P37188	gatB
P0C018	rplR	P18200	pgpA
P06987	hisB	P55799	pphB
P36646	hofC	P36647	ppdD
P0AAH0	pstB	P0AGH8	pstC
P14175	proV	P14176	proW
P60422	rplB	P37177	ptsP
P0A9V1	lptB	P0ADR8	ppnN
P09373	pflB	P0A9N4	pflA
P0A6E6	atpC	P0A8A4	ppsR
P37349	dhaM	P69783	crr
P18775	dmsA	P69783	crr
P0ABT2	dps	P69783	crr
P10346	glnQ	P69783	crr
P10441	lpxB	P0A7D1	pth
P0A8A8	rimP	P0AFM6	pspA
P33025	psuG	P30235	psuK
P08839	ptsI	P0AA04	ptsH
P39399	lgoR	P0ACL9	pdhR
P76078	paaB	P76081	paaE
P0AEJ2	entC	P00903	pabA
P05041	pabB	P00903	pabA
P0A7G6	recA	P05055	pnp
P0AB67	pntB	P07001	pntA
P0A6C1	nfo	P00490	malP
P0AFK9	potD	P00490	malP
P0AFE8	nuoM	P33607	nuoL
P0AFE4	nuoK	P0AFF0	nuoN
P0AFC3	nuoA	P0AFF0	nuoN
P33607	nuoL	P0AFF0	nuoN
P0A8V2	rpoB	P0AFF6	nusA
P0A780	nusB	P0AFF6	nusA
P32711	nrfF	P32710	nrfE
P0AFP6	ybgI	P02932	phoE
P00803	lepB	P02932	phoE
P0AFD1	nuoE	P31979	nuoF
P0AFE8	nuoM	P31979	nuoF
P0AFC7	nuoB	P0AFD4	nuoH
P16433	hycG	P0AFD4	nuoH
P0AFF0	nuoN	P0AFD4	nuoH
P0AFC7	nuoB	P0AFD6	nuoI
P16433	hycG	P0AFD6	nuoI
P0AFF0	nuoN	P0AFD6	nuoI
P0AFD4	nuoH	P0AFD6	nuoI
P0AFC3	nuoA	P0AFE0	nuoJ
P0AFF0	nuoN	P0AFE0	nuoJ
P0AFD4	nuoH	P0AFE0	nuoJ
P45760	gspI	P08337	mutT
P33593	nikD	P33591	nikB
P0AFA9	nikC	P33591	nikB
P0AEN4	ftsL	P32664	nudC
P16688	phnJ	P16686	phnH
P32664	nudC	P16686	phnH
P0ABX8	fliL	P45799	nudE
P30843	basR	P23837	phoQ
P23836	phoP	P23837	phoQ
P0AFC3	nuoA	P33599	nuoC
P0AFC7	nuoB	P33599	nuoC
P0AFD4	nuoH	P33599	nuoC
P0AFD6	nuoI	P33599	nuoC
P08400	phoR	P0A9K7	phoU
P0AFX0	hpf	P0A9K7	phoU
P0AAH0	pstB	P0A9K7	phoU
P0A8F8	uvrB	P68739	nfi
P00914	phrB	P68739	nfi
Q47150	dinJ	P0AF63	nsrR
P16688	phnJ	P16687	phnI
P16679	phnL	P16678	phnK
P16686	phnH	P16678	phnK
P0AEI6	nudJ	P0AFC0	nudB
P16677	phnC	P0DP70	phnE
P16682	phnD	P0DP70	phnE
P0DP69	phnE1	P0DP70	phnE
P16688	phnJ	P16685	phnG
P16679	phnL	P16685	phnG
P16690	phnN	P16685	phnG
P16686	phnH	P16685	phnG
P16687	phnI	P16685	phnG
P0AAH0	pstB	P07654	pstA
P0AGH8	pstC	P0AG82	pstS
P07654	pstA	P0AG82	pstS
P15254	purL	P0A7D4	purA
P05100	tag	P0A9U6	puuR
P29012	dadX	P0AG18	purE
P00509	aspC	P0A7E1	pyrD
P0ADF8	ilvN	P05020	pyrC
P69808	fryB	P77579	fryC
P32670	ptsA	P32155	frvA
P69816	frwB	P32672	frwC
P32676	frwD	P32672	frwC
P0A6R0	fabH	P69786	ptsG
P75745	pxpC	P0AAV4	pxpB
P0A6A8	acpP	P0AAV4	pxpB
P75746	pxpA	P0AAV4	pxpB
P0A7F3	pyrI	P0A786	pyrB
P77671	allB	P0A786	pyrB
P39208	idnK	P77174	ybdM
P0ABS5	dnaG	P0A8A0	yebC
P0A7R1	rplI	P33014	yeeD
P0AGF2	csdE	P33014	yeeD
P69816	frwB	P33014	yeeD
P04128	fimA	P76499	yfcP
P37690	envC	Q46798	ygeR
P0A7L3	rplT	P0AGK4	yhbY
P02359	rpsG	P0AGK4	yhbY
P0A8H6	yihI	P0AGK4	yhbY
P0AEM0	fkpB	P0AGK4	yhbY
P0A9K3	ybeZ	P0AGK4	yhbY
P45766	yhdW	P45768	yhdY
P45767	yhdX	P45768	yhdY
P45767	yhdX	P45769	yhdZ
P45768	yhdY	P45769	yhdZ
P76539	ypeA	P37664	yiaC
P37351	rpiB	P37674	yiaM
P0A9D4	cysE	P37691	yibQ
P0A9E5	fnr	P76569	yfgD
P63177	rlmB	P52102	yfhL
P28630	holA	P52102	yfhL
P0AGL2	tdcF	P0CF86	yfjU
P0A998	ftnA	P0CF86	yfjU
P42906	agaA	P09184	vsr
P0A6F9	groS	P0ADV5	yhbW
P55135	rlmD	P67624	yheU
P37647	kdgK	P37673	yiaL
P45424	yhcH	P37673	yiaL
P37674	yiaM	P37675	yiaN
P37674	yiaM	P37676	yiaO
P37675	yiaN	P37676	yiaO
P0A7N9	rpmG	P25531	yicR
P76387	wzc	P0A930	wza
P38134	etk	P0A930	wza
P37351	rpiB	P31447	yidJ
P0AGI4	xylH	P37388	xylG
P0ACC1	prmC	P0A9M5	gpt
P37643	yhjE	P0AGF4	xylE
P76539	ypeA	P09163	yjaB
P77368	ybcL	P16681	yjdN
P77536	ykgF	P77433	ykgG
P10442	rnhB	P76091	ynbB
P69222	infA	P76091	ynbB
P69913	csrA	P76138	yneL
P77165	paoA	P60632	yohJ
P0A703	hybF	P77475	yqaB
P0A8H8	yacG	P60340	truB
P0ABF6	cdd	P45532	tusD
P45799	nudE	P45532	tusD
P45532	tusD	P45530	tusB
P0AGL5	ratA	P17993	ubiG
P0A887	ubiE	P17993	ubiG
P0A6G3	pncC	P0ACW6	ydcH
P0A8S1	argP	P77171	ydcI
P77795	ydcT	P77156	ydcU
P77795	ydcT	P0AFR9	ydcV
P77156	ydcU	P0AFR9	ydcV
P0A9Z1	glnB	P31131	ydeJ
P65367	yqcA	P77376	ydgJ
P33360	yehX	P33359	yehW
P33360	yehX	P33361	yehY
P0AFU0	yejB	P33915	yejE
P33915	yejE	P33916	yejF
P67080	yggS	P0AD24	yejL
P46144	yedJ	P55734	ygaP
P0ADC1	lptE	P75736	ybfF
P38684	torR	P39901	ybfI
P0ACZ8	cusR	P39901	ybfI
P08368	creB	P39901	ybfI
P0AFJ5	phoB	P39901	ybfI
P03959	kdpA	P39901	ybfI
P16681	yjdN	P12994	ybhB
P0AEL3	feoA	P75806	ybjG
P23827	eco	P0A8X2	yceI
P46853	yhhX	P75931	yceM
P10442	rnhB	P21362	yciF
P0AFW2	rmf	P0AFR4	yciO
P10905	ugpA	P77716	ycjP
P77716	ycjP	P77481	ycjV
P31057	panB	P0AA31	yedF
P69348	yoeB	P69346	yefM
P36659	cbpA	P36928	yegD
P09372	grpE	P36928	yegD
P64474	ydhL	P0ABW3	yfaE
P0ACA1	yibF	P76514	yfdR
P0ADV9	lptC	P0ADP0	yigB
P77379	rclR	P32677	yijO
P39383	yjiL	P39384	yjiM
P76223	ynjB	P76909	ynjD
P76224	ynjC	P76909	ynjD
P0A968	cspD	P0AA57	yobA
P75867	ycbZ	P27848	yigL
P45736	ycjD	P0AF50	yjbR
P0A8Y3	yihX	P0AF50	yjbR
P37640	yhjB	P0AF50	yjbR
P69488	cutA	P39274	yjdJ
P00490	malP	P39274	yjdJ
P45956	ygbF	P0AFJ1	yjdM
P0ABQ0	coaBC	P76068	ynaK
P23484	fecI	P77396	ypdC
P76241	nimR	P77396	ypdC
P0ACI3	xylR	P77396	ypdC
P0A7Z4	rpoA	P05852	tsaD
P0A8V2	rpoB	P05852	tsaD
P0AF67	tsaE	P05852	tsaD
P76256	tsaB	P05852	tsaD
P28306	mltG	P05852	tsaD
P45799	nudE	P45531	tusC
P0A9J8	pheA	P07023	tyrA
P0A6Z6	nikR	P77295	ygaV
P11667	argO	P0ACC9	wcaB
P77165	paoA	P64557	ygfM
P0AA10	rplM	P0ADS6	yggE
P14175	proV	P52052	yggR
P25536	yhdE	P52060	yggU
P0AFH6	oppC	Q46863	ygiS
Q46800	xdhB	Q46801	xdhC
Q46799	xdhA	Q46801	xdhC
P64557	ygfM	Q46801	xdhC
P0A780	nusB	P0A8P8	xerD
P36995	cspB	P64448	ynbE
P0A972	cspE	P64448	ynbE
P76076	ydbL	P64448	ynbE
P0A7K6	rplS	Q46856	yqhD
P0ABJ9	cydA	Q46856	yqhD
P0ABT2	dps	Q46856	yqhD
P75750	ybgQ	P77616	yqiH
P76078	paaB	P76084	paaI
P69789	glvB	P31452	glvC
P06709	birA	P0A790	panD
P0AF90	rraB	P0A9J4	panE
P0ACF8	hns	P0A9J4	panE
P0ABS1	dksA	P02919	mrcB
P0AEM0	fkpB	P19624	pdxA
P0ABD5	accA	P0A794	pdxJ
P09372	grpE	P0A794	pdxJ
P60438	rplC	P25539	ribD
P68398	tadA	P25539	ribD
P08550	cvpA	P25539	ribD
P0AB55	yciI	P25539	ribD
P76938	epmC	P0A944	rimI
P77756	queC	P0AFU8	ribC
P75794	ybiY	P75793	ybiW
P31133	potF	P0A799	pgk
P0ADS6	yggE	P43671	pqiB
P0AA04	ptsH	P69824	cmtB
P68919	rplY	P42904	agaV
P0A6R0	fabH	P42904	agaV
P0A9L5	ppiC	P69791	chbA
P52102	yfhL	P69795	chbB
P69791	chbA	P69795	chbB
P0AGL5	ratA	P69829	ptsN
P0AFX4	rsd	P0A9N0	ptsO
P0AGL5	ratA	P0A9N0	ptsO
P69791	chbA	P0A9N0	ptsO
P04993	recD	P08394	recB
P04993	recD	P07648	recC
P0ADS6	yggE	P07648	recC
P08394	recB	P07648	recC
P0A7R5	rpsJ	P0AFW0	rfaH
P62399	rplE	P0A7H0	recF
P0A7H6	recR	P0A7H0	recF
P0AC30	ftsX	P0A7H0	recF
P75933	flgA	P28304	qorA
P0AG48	rplU	P28369	prfH
P39199	prmB	P28369	prfH
P61175	rplV	P21893	recJ
P0AFX4	rsd	P04982	rbsD
P0A9J6	rbsK	P04982	rbsD
P21514	pdeL	P04982	rbsD
P0AGI1	rbsC	P04983	rbsA
P77622	ddpF	P04983	rbsA
P0AGI1	rbsC	P02925	rbsB
P04982	rbsD	P02925	rbsB
P18843	nadE	P64530	rcnR
P0AG55	rplF	P0A7I4	prfC
P0A847	tgt	P0A7I4	prfC
P0A796	pfkA	P0A7I4	prfC
P69924	nrdB	P00452	nrdA
P39452	nrdE	P37146	nrdF
P0A7J3	rplJ	P0A7J7	rplK
P0A9L8	proC	P0A7J7	rplK
P0A8T1	prmA	P0A7J7	rplK
P0ADR8	ppnN	P0A7J7	rplK
P0AB77	kbl	P07913	tdh
P60422	rplB	P0AG24	spoT
P02359	rpsG	P0AG24	spoT
P60546	gmk	P0AG24	spoT
P00914	phrB	P77754	spy
P0A8X2	yceI	P77754	spy
P42589	ygjH	P77626	sutR
P0A705	infB	P21889	aspS
P45577	proQ	P52097	tilS
P0A9P4	trxB	P0AGG4	trxC
P77395	cnoX	P0AGG4	trxC
P0AD49	raiA	P37025	thpR
P00561	thrA	P00934	thrC
P0ADY3	rplN	P0A850	tig
P0ADZ0	rplW	P0A850	tig
P61175	rplV	P0A850	tig
P0A6F9	groS	P0A850	tig
P31133	potF	P0A850	tig
P0A7Z4	rpoA	P0AGE0	ssb
P03007	dnaQ	P0AGE0	ssb
P0AGE9	sucD	P0A836	sucC
P77499	sufC	P77522	sufB
P0A7P5	rpmH	P77689	sufD
P77499	sufC	P77689	sufD
P76194	sufE	P77689	sufD
P03007	dnaQ	P77689	sufD
P77522	sufB	P77689	sufD
P76194	sufE	P77444	sufS
P0A6B7	iscS	P77444	sufS
P0A873	trmD	P77718	thiI
P05523	mutM	P77718	thiI
P30139	thiG	O32583	thiS
P0AFK0	pmbA	P0AGG8	tldD
P60438	rplC	P0AGI8	trkA
P63386	mlaF	P0AGI8	trkA
P0AGI8	trkA	P23849	trkG
P0AGI8	trkA	P0AFZ7	trkH
P77774	bamB	P23003	trmA
P45577	proQ	P23003	trmA
P60422	rplB	P0A8I5	trmB
P32712	nrfG	P0A8I5	trmB
O32583	thiS	P30138	thiF
P0A7Q6	rpmJ	P0AE01	trmJ
P0A8I8	rlmH	P0AGJ7	trmL
P33644	yfiH	P0AGJ7	trmL
P0ADX9	rsmD	P31825	yfiC
P69441	adk	P31825	yfiC
P0AAC8	iscA	P0A867	talA
P0AG51	rpmD	P0A7W1	rpsE
P0A8V2	rpoB	P0A7W1	rpsE
P0A7W7	rpsH	P0A7W1	rpsE
P0AGA2	secY	P0A7W1	rpsE
P03018	uvrD	P0A7W1	rpsE
P06610	btuE	P0A7W1	rpsE
P0A6Z1	hscA	P0A7W1	rpsE
P05055	pnp	P0A7W1	rpsE
P60422	rplB	P02358	rpsF
P0A7Q6	rpmJ	P02358	rpsF
P0A7R5	rpsJ	P02358	rpsF
P68919	rplY	P02358	rpsF
P03018	uvrD	P02358	rpsF
P0AFG0	nusG	P02358	rpsF
P68739	nfi	P02358	rpsF
P0ADY7	rplP	P0A7R9	rpsK
P0A7Y8	rnpA	P0A7R9	rpsK
P02359	rpsG	P0A7R9	rpsK
P0A7K6	rplS	P0A7R9	rpsK
P0A707	infC	P0A7R9	rpsK
P0AC19	folX	P0A7R9	rpsK
P0A7W1	rpsE	P0A7R9	rpsK
P0A7Q1	rpmI	P0AG63	rpsQ
P0AE76	cobU	P0AG63	rpsQ
P76079	paaC	P0AG63	rpsQ
P45530	tusB	P0AG63	rpsQ
P02358	rpsF	P0AG63	rpsQ
P0A7R1	rplI	P0A7T7	rpsR
P0A7P5	rpmH	P0A7T7	rpsR
P0A7M2	rpmB	P0A7T7	rpsR
P0A976	cspF	P0A7T7	rpsR
P0A707	infC	P0A7T7	rpsR
P02358	rpsF	P0A7T7	rpsR
P68206	yjbJ	P0AG59	rpsN
P69913	csrA	P0AG59	rpsN
P28905	holC	P0AG59	rpsN
P0ABC3	hflC	P0AG59	rpsN
P0A7R9	rpsK	P0AG59	rpsN
P0A7R1	rplI	P0A7V0	rpsB
P0A7Q1	rpmI	P0A7V0	rpsB
P36979	rlmN	P0A7V0	rpsB
P60624	rplX	P0A7V0	rpsB
P02413	rplO	P0A7V0	rpsB
P0A7U3	rpsS	P0A7V0	rpsB
P0A7W7	rpsH	P0A7V0	rpsB
P0A7E9	pyrH	P0A7V0	rpsB
P61175	rplV	P0A7V0	rpsB
P10443	dnaE	P0A7V0	rpsB
P0A722	lpxA	P0A7V0	rpsB
P0A707	infC	P0A7V0	rpsB
P45568	dxr	P0A7V0	rpsB
P0A6W5	greA	P0A7V0	rpsB
P0A6M8	fusA	P0A805	frr
P0A7I4	prfC	P0A805	frr
P77718	thiI	P0A805	frr
P67080	yggS	P46849	rtcA
P0AAH8	sapF	P0AGH5	sapC
P62399	rplE	P0A7V3	rpsC
P0A7Z4	rpoA	P0A7V3	rpsC
P0A7L8	rpmA	P0A7V3	rpsC
P0A7R5	rpsJ	P0A7V3	rpsC
P0A7J3	rplJ	P0A7V3	rpsC
P0ADY3	rplN	P0A7V3	rpsC
P0A7E9	pyrH	P0A7V3	rpsC
P0A9Y6	cspC	P0A7V3	rpsC
P05055	pnp	P0A7V3	rpsC
P0A7J7	rplK	P0A7V3	rpsC
P0A7W1	rpsE	P0A7V3	rpsC
P0A7R9	rpsK	P0A7V3	rpsC
P0AG59	rpsN	P0A7V3	rpsC
P0A7V0	rpsB	P0A7V3	rpsC
P0A7R1	rplI	P0A7V8	rpsD
P0C0R7	rlmE	P0A7V8	rpsD
P60422	rplB	P0A7V8	rpsD
P60438	rplC	P0A7V8	rpsD
P0A7R5	rpsJ	P0A7V8	rpsD
P0A7L0	rplA	P0A7V8	rpsD
P0A7M2	rpmB	P0A7V8	rpsD
P0A7M9	rpmE	P0A7V8	rpsD
P60723	rplD	P0A7V8	rpsD
P0A7U3	rpsS	P0A7V8	rpsD
Q57261	truD	P0A7V8	rpsD
P0A9Y6	cspC	P0A7V8	rpsD
P23930	lnt	P0A7V8	rpsD
P0A6Z1	hscA	P0A7V8	rpsD
P22939	ispA	P0A7V8	rpsD
P25539	ribD	P0A7V8	rpsD
P0AGE0	ssb	P0A7V8	rpsD
P0A7W1	rpsE	P0A7V8	rpsD
P0A809	ruvA	P0A812	ruvB
P0AAZ4	rarA	P0A812	ruvB
P09155	rnd	P0A7T3	rpsP
P45530	tusB	P0A7T3	rpsP
P68646	fixX	P0ADZ4	rpsO
P15070	fliN	P0ADZ4	rpsO
P68739	nfi	P0ADZ4	rpsO
P52119	ratB	P0ADZ4	rpsO
P0C018	rplR	P0A776	rppH
P0A8I8	rlmH	P0A776	rppH
P0AGK4	yhbY	P0A776	rppH
P60438	rplC	P0A7S3	rpsL
P0ADY7	rplP	P0A7S3	rpsL
P02359	rpsG	P0A7S3	rpsL
P0A7W7	rpsH	P0A7S3	rpsL
P0A986	cspI	P0A7S3	rpsL
P0A6Y5	hslO	P0A7S3	rpsL
P0A7I4	prfC	P0A7S3	rpsL
P0A805	frr	P0A7S3	rpsL
P0A7V3	rpsC	P0A7S3	rpsL
P0A7R1	rplI	P0A7S9	rpsM
P0ADY7	rplP	P0A7S9	rpsM
P0A7N1	ykgM	P0A7S9	rpsM
P0A7M9	rpmE	P0A7S9	rpsM
P0A7U3	rpsS	P0A7S9	rpsM
P13000	bioD1	P0A7S9	rpsM
P0A7R5	rpsJ	P0A7X3	rpsI
P0A7L0	rplA	P0A7X3	rpsI
P02359	rpsG	P0A7X3	rpsI
P0AG59	rpsN	P0A7X3	rpsI
P0A7V8	rpsD	P0A7X3	rpsI
P0A7S3	rpsL	P39286	rsgA
P0A766	rsxA	P77223	rsxB
P0A766	rsxA	P77179	rsxE
P76182	rsxD	P77179	rsxE
P77223	rsxB	P77179	rsxE
P36979	rlmN	P0A814	ruvC
P0ABV2	exbD	P0A814	ruvC
P0A6F9	groS	P0A814	ruvC
P0A812	ruvB	P0A814	ruvC
P0A7M2	rpmB	P0AG96	secE
P0AGA2	secY	P0AG96	secE
P0ADZ0	rplW	P0AG96	secE
P0AG90	secD	P0AG93	secF
P0AC47	frdB	P0AC41	sdhA
P0ABU9	tolQ	P0AG86	secB
P0A6I9	coaE	P0AG86	secB
P0A7A9	ppa	P0AG86	secB
P0AG27	yibN	P0AG86	secB
Q46791	ygeK	P07026	sdiA
P0AGA2	secY	P0AG99	secG
P0AFE4	nuoK	P0AG99	secG
P0AG93	secF	P0AG99	secG
P0AEF8	dppB	Q47622	sapA
P75798	gsiC	Q47622	sapA
P76182	rsxD	P77285	rsxG
P77223	rsxB	P77285	rsxG
P77179	rsxE	P77285	rsxG
P0ACT2	envR	P0ACU2	rutR
P0A7Y8	rnpA	P68679	rpsU
P0A7M2	rpmB	P68679	rpsU
P0A7M9	rpmE	P68679	rpsU
P0A8V2	rpoB	P68679	rpsU
P31057	panB	P68679	rpsU
P02358	rpsF	P68679	rpsU
P0A7R9	rpsK	P68679	rpsU
P0A766	rsxA	P77611	rsxC
P76182	rsxD	P77611	rsxC
P0AFH6	oppC	P0AGH3	sapB
P0AAH4	sapD	P0AGH3	sapB
P0AGH5	sapC	P0AGH3	sapB
Q47538	tauB	Q47539	tauC
P0A6I9	coaE	P0A7F6	speD
P0A7J3	rplJ	P0AGD7	ffh
P0A7M6	rpmC	P0AGD7	ffh
P0ADZ0	rplW	P0AGD7	ffh
P33013	dacD	P0AFZ3	sspB
P0AGK8	iscR	P0AFZ3	sspB
P77509	yphE	P31548	thiQ
P31549	thiP	P31548	thiQ
P08178	purM	P0A8L1	serS
P0AG96	secE	P0A8L1	serS
P0AGL5	ratA	P0A832	smpB
P0A7I4	prfC	P0A832	smpB
P37678	sgbH	P0A832	smpB
P0A6F9	groS	P0ACG1	stpA
P0A7R1	rplI	P31550	thiB
P31549	thiP	P31550	thiB
O32583	thiS	P77667	sufA
P0A937	bamE	P0ABZ6	surA
P0ADA3	nlpD	P0ABZ6	surA
P0AG86	secB	P0ABZ6	surA
Q57261	truD	P69428	tatA
P0A7K2	rplL	P0AGB0	serB
P0A903	bamC	P0AGB0	serB
P0A9W9	yrdA	P30140	thiH
P30139	thiG	P30140	thiH
P37691	yibQ	P0A8N5	lysU
P0A7V0	rpsB	P0A8N5	lysU
P0AG48	rplU	P0AEU7	skp
P36979	rlmN	P0AEU7	skp
P0AEH1	rseP	P0AEU7	skp
P0A7K6	rplS	P0AEU7	skp
P0A968	cspD	P0AEU7	skp
P0ABD8	accB	P0AEU7	skp
P0A7C2	lexA	P0AEU7	skp
P0A832	smpB	P0AEU7	skp
P76423	thiM	P30137	thiE
P0AAI5	fabF	P21888	cysS
P0ADR6	rlmM	P0AGG0	thiL
P00895	trpE	P0AGG0	thiL
P0ACE7	hinT	P08312	pheS
P07395	pheT	P08312	pheS
P0A9P4	trxB	P0AA25	trxA
P69330	citD	P0AA25	trxA
P0AF59	yjdI	P0AA25	trxA
P0AC41	sdhA	P0AA25	trxA
P24228	dacB	P11875	argS
P76423	thiM	P76422	thiD
P0ADY7	rplP	P00960	glyQ
P00961	glyS	P00960	glyQ
P0AG86	secB	P60906	hisS
P0AC47	frdB	P08245	yciH
P69346	yefM	P08245	yciH
P77716	ycjP	P0AFR7	ycjO
P77481	ycjV	P0AFR7	ycjO
P0AE56	bfd	P0ACX9	ydiE
P76241	nimR	P77402	ydiP
P0ACI3	xylR	P77402	ydiP
P76201	ydiQ	P77378	ydiR
P0ADV9	lptC	P0ACY1	ydjA
P0A9M5	gpt	P0ACY1	ydjA
P0A790	panD	P76219	ydjX
P64515	yecN	P76231	yeaC
P31553	caiT	P0ABD1	yeaV
P0AE34	artQ	P37774	yecC
P76291	cmoB	P37348	yecE
P0AEM9	fliY	P0AFT2	yecS
P37774	yecC	P0AFT2	yecS
P0A6H5	hslU	P0A8B5	ybaB
P0AGD7	ffh	P0A8B5	ybaB
P77379	rclR	P77634	ybcM
Q46855	yqhC	P77634	ybcM
P0A7M2	rpmB	P0AAT2	ybdF
P60720	lipB	P0A8J4	ybeD
P0ACR2	ydhB	P30979	ybeF
Q47679	yafV	P0DP64	ybeM
P75750	ybgQ	P75749	ybgP
P0A8S1	argP	P52696	ybhD
P00634	phoA	P46923	torZ
P09155	rnd	P0AB18	tusE
P60720	lipB	P0AB18	tusE
P45530	tusB	P0AB18	tusE
P0AEU7	skp	P0A890	tusA
P04152	umuC	P0AG11	umuD
P69822	ulaB	P69820	ulaC
P25535	ubiI	P0ADP7	ubiJ
P69828	gatA	P39306	ulaF
P05847	ttdA	P0AC35	ttdB
P10151	leuO	P45463	ttdR
P00895	trpE	P00904	trpGD
P45577	proQ	P07649	truA
P27862	yigZ	P0AFQ7	ycfH
P0ABV2	exbD	P0A8L5	ycgN
P0A698	uvrA	P0AAZ7	ycaR
P16685	phnG	P0AAZ7	ycaR
P0A7T7	rpsR	P0AAZ7	ycaR
P30130	fimD	P40876	ycbF
P26602	ubiC	P36879	yadG
P0AFP6	ybgI	P0AFN6	yadH
P36879	yadG	P0AFN6	yadH
P0AF67	tsaE	P36881	yadI
P0AA04	ptsH	P36881	yadI
P77439	fryA	P36881	yadI
P0A9N0	ptsO	P36881	yadI
P0C079	relB	Q47149	yafQ
Q47150	dinJ	Q47149	yafQ
Q46948	yajL	P75697	yaiX
P0AGA2	secY	P0ADZ7	yajC
P25714	yidC	P0ADZ7	yajC
P0AG96	secE	P0ADZ7	yajC
P0ACX9	ydiE	P0ADZ7	yajC
P42604	uxaA	P0A6L7	uxaB
P0AA53	qmcA	P0AAS3	ybbJ
P25397	tehB	P30866	yafE
P77247	hxpB	P18393	ybdZ
P10905	ugpA	P0AG80	ugpB
P10906	ugpE	P10907	ugpC
P10905	ugpA	P10907	ugpC
P75933	flgA	P10908	ugpQ
P0AGA2	secY	P10408	secA
P0AG86	secB	P10408	secA
P0AG99	secG	P10408	secA
P0AC41	sdhA	P07014	sdhB
P0A9K1	phoH	P30852	smf
P37665	yiaD	P0A9K9	slyD
P36995	cspB	P0A8R4	slyX
P45530	tusB	P0A8R4	slyX
P45465	yraN	P0A8R4	slyX
P0A780	nusB	P0AGC3	slt
P0A7E3	pyrE	P0AGC3	slt
P75933	flgA	P0A9T4	tas
P67603	yqfB	P0A843	tatE
P77249	sfmC	P77468	sfmD
P08394	recB	P0A823	sfsA
P69428	tatA	P69423	tatC
P0A9N0	ptsO	P39363	sgcA
P31057	panB	P39361	sgcR
P39363	sgcA	P58035	sgcB
P0AA86	dsbE	P69425	tatB
P69423	tatC	P69425	tatB
P36979	rlmN	P14081	selB
P28305	pabC	P0ADE2	ytfK
P0A7M2	rpmB	P0A8X0	yjgA
P0ADZ4	rpsO	P0A8X0	yjgA
P45465	yraN	P22787	yifB
P0A7A5	pcm	P32680	yjaG
P0ACU2	rutR	P39309	ytfA
P67095	yfcE	P46888	uspC
P30131	hypF	P46888	uspC
P0C077	relE	Q47156	yafN
P0ADZ0	rplW	P36680	zapD
P0C093	slmA	P77173	zipA
P37772	yjfF	Q6BEX0	ytfR
P39328	ytfT	Q6BEX0	ytfR
P39406	rsmC	P0ADE8	ygfZ
P64559	sdhE	P0ADE8	ygfZ
P28632	holD	P0ADW8	yheV
P15288	pepD	P0A8F0	upp
P0A836	sucC	P0A8F0	upp
P0AFW4	rnk	P39177	uspG
P0A6F9	groS	P39177	uspG
P0C054	ibpA	P39177	uspG
P0AAC0	uspE	P39177	uspG
P23305	yigA	P0A8I3	yaaA
P0A6V8	glk	P0A8I3	yaaA
P60723	rplD	P0A8G0	uvrC
P0A8F8	uvrB	P0A8G0	uvrC
P0AFP2	atl	P0A8G0	uvrC
P0A7M9	rpmE	P0AA97	yaeQ
P0A988	dnaN	P0A8E7	yajQ
P39832	znuB	P39172	znuA
P39328	ytfT	P39325	ytfQ
P0A7Y0	rnc	P0A898	ybeY
P28630	holA	P0A898	ybeY
P39832	znuB	P0A9X1	znuC
P39172	znuA	P0A9X1	znuC
P76539	ypeA	P76112	mnaT
P0AG11	umuD	P30749	moaE
P36675	arfA	P32173	mobA
P09152	narG	P32173	mobA
P21513	rne	P0A9X4	mreB
P0A8Q6	clpS	P16926	mreC
P76053	smrA	P16926	mreC
P08337	mutT	P0ABH4	mreD
P16926	mreC	P0ABH4	mreD
P0AAM1	hyaC	P0ACD8	hyaB
P19930	hyaD	P0ACD8	hyaB
P0AAM7	hybG	P0ACD8	hyaB
P69783	crr	P02916	malF
P0AAI9	fabD	P0A749	murA
P0AFQ7	ycfH	P0A6U3	mnmG
P0AFX0	hpf	P22186	mraZ
P33644	yfiH	P22186	mraZ
P0A9A6	ftsZ	P0AEZ3	minD
P0AGC3	slt	P0AEZ3	minD
P0A6U3	mnmG	P25522	mnmE
P0ADY7	rplP	P32125	mobB
P0ACC3	erpA	P32125	mobB
P0AF03	mog	P32125	mobB
P0AF01	modB	P09833	modC
P05793	ilvC	P31060	modF
P76142	lsrB	P77672	lsrC
P77174	ybdM	P0C0S1	mscS
P77295	ygaV	P0AEZ1	metF
P60390	rsmH	P16384	miaA
P0AFG0	nusG	P16384	miaA
P12008	aroC	P0AEI1	miaB
P0A9X4	mreB	P0AEI1	miaB
P0AB18	tusE	P25745	mnmA
P0A6T9	gcvH	P18196	minC
P0A752	nadD	P18196	minC
P0AEZ3	minD	P18196	minC
P45566	yhdT	P0A738	moaC
P0AF01	modB	P37329	modA
Q46865	mqsR	Q46864	mqsA
P0AC02	bamD	P0A6W3	mraY
P17952	murC	P17443	murG
P0AA25	trxA	P76270	msrC
P64461	lsrG	P75679	insN1
P36659	cbpA	P77319	hscC
P09372	grpE	P77319	hscC
P0AGK4	yhbY	P0A6Y1	ihfB
P02358	rpsF	P0A6Y1	ihfB
P00893	ilvI	P00894	ilvH
P75680	insO1	P0CF60	insD8
P0ADY3	rplN	P0AAT6	rsfS
P0A6M8	fusA	P0AAT6	rsfS
P60720	lipB	P0AAT6	rsfS
P63020	nfuA	P0AAT6	rsfS
P0AG48	rplU	P0A717	prs
P0A6F9	groS	P0A717	prs
P0A6Z1	hscA	P0ACD4	iscU
P0A6L9	hscB	P0ACD4	iscU
P0ADY7	rplP	P60785	lepA
P60723	rplD	P60785	lepA
P0A7J7	rplK	P60785	lepA
P17169	glmS	P62615	ispE
P0A9K1	phoH	P52062	hemW
P60785	lepA	P52062	hemW
P64578	higB	P67701	higA
P23874	hipA	P23873	hipB
P0A9Z1	glnB	P30870	glnE
P0A9C5	glnA	P30870	glnE
P0A749	murA	P30870	glnE
P0A6Z6	nikR	P68688	grxA
P77174	ybdM	P68688	grxA
P0ABE2	bolA	P0AC69	grxD
P0AFD1	nuoE	P0AC69	grxD
P0A9W6	ibaG	P0AC69	grxD
P0A7V8	rpsD	P0AC69	grxD
P69797	manX	P63228	gmhB
P0AC28	ygfA	P0ACL0	glpR
P10346	glnQ	P0AEQ6	glnP
P36566	cmoM	P09391	glpG
P0ACJ0	lrp	P09391	glpG
P17846	cysI	P0A6F3	glpK
P0AA10	rplM	P75767	ybhK
P02359	rpsG	P75767	ybhK
P0A7N1	ykgM	P45759	gspE
P41441	gspF	P45759	gspE
P0A7G6	recA	P69931	hda
P0A6F9	groS	P09126	hemD
P0A6T3	galK	P09148	galT
P0A6V8	glk	P06715	gor
P75799	gsiD	P75797	gsiB
Q46845	yghU	P0A9D2	gstA
P31992	pptA	P77682	yfdG
P52096	yaeR	P77682	yfdG
P32153	frvX	P37689	gpmI
P62707	gpmA	P37689	gpmI
P0AGJ7	trmL	P37689	gpmI
P60472	ispU	P37689	gpmI
P0ABD8	accB	P0A731	mgsA
P0AB18	tusE	P0A731	mgsA
P37052	ychJ	P0A8U6	metJ
P76562	tmcA	P28635	metQ
P0A8V2	rpoB	P30958	mfd
P0A698	uvrA	P30958	mfd
P61175	rplV	P0ACE0	hybC
P37182	hybD	P0ACE0	hybC
P0AAG3	gltL	P31462	mdtL
P60624	rplX	P69739	hyaA
P0ADZ0	rplW	P69739	hyaA
P0AAM1	hyaC	P69739	hyaA
P08622	dnaJ	P69739	hyaA
P19930	hyaD	P69739	hyaA
P0ACD8	hyaB	P69739	hyaA
P0A7W7	rpsH	P0A734	minE
P0ADE8	ygfZ	P0A734	minE
P0AEZ3	minD	P0A734	minE
P0A6G7	clpP	P27300	lpxK
P04951	kdsB	P27300	lpxK
P77672	lsrC	P77257	lsrA
P77257	lsrA	P0AFS1	lsrD
P24193	hypE	P69741	hybO
P0ACE0	hybC	P69741	hybO
P04983	rbsA	P23200	mglC
P0AAG8	mglA	P23200	mglC
P02916	malF	P68183	malG
P0AEX9	malE	P68183	malG
P0A7Z4	rpoA	P0ACH5	marA
P31467	yieH	P0ACH5	marA
P30750	metN	P31547	metI
P28635	metQ	P31547	metI
P0ABE2	bolA	P0A6R3	fis
P0A6X7	ihfA	P0A6R3	fis
P31992	pptA	P0A9C3	galM
P60566	fixA	P31574	fixB
P0AAJ3	fdnH	P24183	fdnG
P39173	yeaD	P0A6V1	glgC
P07821	fhuC	P06972	fhuB
P07822	fhuD	P06972	fhuB
P15031	fecE	P15030	fecC
P76080	paaD	P0ADH7	fimE
P0AB43	ycgL	P07762	glgB
P37028	btuF	P23877	fepG
P23878	fepC	P23877	fepG
P77223	rsxB	P75849	gloC
P0A8T7	rpoC	P30128	greB
P64634	hofN	P52061	rdgB
P41443	gspH	P41442	gspG
P41441	gspF	P41442	gspG
P75982	ymfQ	P75981	jayE
P0AFI2	parC	P0AES6	gyrB
P20083	parE	P0AES4	gyrA
P0AES6	gyrB	P0AES4	gyrA
P0A6G7	clpP	P37355	menH
P0A8V0	rbn	P77781	menI
P0A7S9	rpsM	P43341	lpxH
P76068	ynaK	P0AE72	mazE
P52007	yecM	P37353	menE
P33913	yejA	P0C0T5	mepA
P26281	folK	P0C0T5	mepA
P62672	apaG	P0AFV4	mepS
P33644	yfiH	P45578	luxS
P37774	yecC	P68187	malK
P68183	malG	P68187	malK
P37639	gadX	P0ACH8	melR
Q6BF17	dgoD	P29208	menC
P37005	lasT	P29208	menC
P67095	yfcE	P0AE70	mazF
P0AE72	mazE	P0AE70	mazF
P39408	yjjV	P0A8N0	matP
P77239	cusB	P37636	mdtE
P37636	mdtE	P37637	mdtF
P77463	ddpC	P76128	ddpA
P77308	ddpB	P76128	ddpA
P0A873	trmD	P0ACJ5	decR
P0ACI6	asnC	P0ACJ5	decR
P77308	ddpB	P77268	ddpD
P04983	rbsA	P77268	ddpD
P09833	modC	P77268	ddpD
P02931	ompF	P0C0V0	degP
P26459	appC	P23886	cydC
P37349	dhaM	P76015	dhaK
P0A6R3	fis	P0AC13	folP
P37349	dhaM	P76014	dhaL
P76015	dhaK	P76014	dhaL
P21514	pdeL	P76245	dgcP
P0A800	rpoZ	P69054	sdhC
P07014	sdhB	P69054	sdhC
P61320	lolB	P0AC44	sdhD
P0A6L9	hscB	P0AC44	sdhD
P07014	sdhB	P0AC44	sdhD
P69054	sdhC	P0AC44	sdhD
P31459	dgoK	Q6BF16	dgoA
P0AFM9	pspB	P09549	dedD
P08622	dnaJ	P0A6Y8	dnaK
P0A6Z3	htpG	P0A6Y8	dnaK
P0A6H5	hslU	P0A6Y8	dnaK
P09372	grpE	P0A6Y8	dnaK
P60422	rplB	P03004	dnaA
P0ADY7	rplP	P03004	dnaA
P0A7V3	rpsC	P03004	dnaA
P02413	rplO	P0ACB0	dnaB
P24554	radA	P0ACB0	dnaB
P06710	dnaX	P0ACB0	dnaB
P0A937	bamE	P75949	nagZ
P0AG18	purE	P0AF24	nagD
P10902	nadB	P11458	nadA
P78067	ynjE	P46022	mtgA
P69824	cmtB	P46022	mtgA
P16926	mreC	P0AD65	mrdA
P23894	htpX	P0A742	mscL
P0A8N5	lysU	P0A742	mscL
P0AB52	ychN	P0A742	mscL
P0A9I8	nirD	P0A744	msrA
P0ACY9	yebG	P22188	murE
P46889	ftsK	P23909	mutS
P23367	mutL	P23909	mutS
P0A790	panD	P22634	murI
P0A7F6	speD	P11880	murF

## Sheet: PDB
UniprotID_p1	GeneName_p1	UniprotID_p2	GeneName_p2
P0A7R1	rplI	P60422	rplB
P0A7L3	rplT	P0AG48	rplU
P0A7Z4	rpoA	P24255	rpoN
P0ADY7	rplP	P0A7L8	rpmA
P0A7Z4	rpoA	P0A800	rpoZ
P0A7Z4	rpoA	P0A8T7	rpoC
P24255	rpoN	P0A8T7	rpoC
P0A800	rpoZ	P0A8T7	rpoC
P0A7L8	rpmA	P0C018	rplR
P27830	rffG	P37759	rfbB
P0ADY7	rplP	P68919	rplY
P0A7K2	rplL	P0A7J3	rplJ
P60438	rplC	P0AA10	rplM
P0A7L3	rplT	P0AA10	rplM
P0AG48	rplU	P0AA10	rplM
P60438	rplC	P0ADY3	rplN
P60438	rplC	P0AG44	rplQ
P0A7N4	rpmF	P0AG44	rplQ
P0A7Q1	rpmI	P02413	rplO
P0A7R1	rplI	P0A7M2	rpmB
P0A7R1	rplI	P0A7N1	ykgM
P62399	rplE	P0A7N1	ykgM
P0A7R1	rplI	P0A7M9	rpmE
P62399	rplE	P0A7M9	rpmE
P02413	rplO	P60723	rplD
P0A7Z4	rpoA	P0A8V2	rpoB
P24255	rpoN	P0A8V2	rpoB
P0A800	rpoZ	P0A8V2	rpoB
P0A8T7	rpoC	P0A8V2	rpoB
P0A7N1	ykgM	P0A7U3	rpsS
P0A7M9	rpmE	P0A7U3	rpsS
P0A877	trpA	P0A879	trpB
P05719	hsdS	P08957	hsdM
P61887	rffH	P37744	rfbA
P0A7P5	rpmH	P0ADZ0	rplW
P0A7M6	rpmC	P0ADZ0	rplW
P0AGA2	secY	P0ADZ0	rplW
P0A7Z4	rpoA	P00579	rpoD
P0A8T7	rpoC	P00579	rpoD
P0A8V2	rpoB	P00579	rpoD
P0A8T7	rpoC	P13445	rpoS
P0A8V2	rpoB	P13445	rpoS
P33022	rihB	P22564	rihC
P0A7Z4	rpoA	P60240	rapA
P0A8T7	rpoC	P60240	rapA
P0A8V2	rpoB	P60240	rapA
P0A7I7	ribA	P0A7J0	ribB
P33022	rihB	P41409	rihA
P22564	rihC	P41409	rihA
P25888	rhlE	P0A8J8	rhlB
P0C077	relE	P0C079	relB
P60438	rplC	P0A7K6	rplS
P0ADY3	rplN	P0A7K6	rplS
P0A7N4	rpmF	P61175	rplV
P0AG44	rplQ	P61175	rplV
P77221	yahG	P77129	ylbE
P0ABB0	atpA	P0ABB4	atpD
P52141	yfjZ	P76364	cbeA
P76458	atoD	P76459	atoA
Q46802	ygeV	Q06065	atoC
P0ABB0	atpA	P0ABA6	atpG
P0ABB4	atpD	P0ABA6	atpG
P0ABB0	atpA	P0A6E6	atpC
P0ABB4	atpD	P0A6E6	atpC
P0ABA6	atpG	P0A6E6	atpC
P0AB98	atpB	P68699	atpE
P31224	acrB	P24177	acrD
P02930	tolC	P0AE06	acrA
P31224	acrB	P0AE06	acrA
P24177	acrD	P0AE06	acrA
P0A8T7	rpoC	P0ABS1	dksA
P0A8V2	rpoB	P0ABS1	dksA
P0A7L0	rplA	P0A6P5	der
P25888	rhlE	P0A9P6	deaD
P0A8J8	rhlB	P0A9P6	deaD
P31224	acrB	P0AAW9	acrZ
P24177	acrD	P0AAW9	acrZ
P77581	astC	P18335	argD
P60061	adiC	P0AAE8	cadB
P30859	artI	P30860	artJ
Q46829	bglA	P24240	ascB
Q46807	yqeA	P77624	yahI
Q46896	ygbT	P45956	ygbF
Q46898	casD	Q46899	casC
Q46897	casE	Q46899	casC
P00887	aroH	P0AB91	aroG
P38684	torR	P0A9Q1	arcA
Q46807	yqeA	P37306	arcC
P77624	yahI	P37306	arcC
P06611	btuD	P06609	btuC
P37028	btuF	P06609	btuC
P00887	aroH	P00888	aroF
P0AB91	aroG	P00888	aroF
Q46829	bglA	P11988	bglB
P24240	ascB	P11988	bglB
P0ABD5	accA	P0A9Q5	accD
P24224	acpS	P0A6A8	acpP
P13001	bioH	P0A6A8	acpP
P0A6B4	alr	P29012	dadX
P02930	tolC	P24180	acrE
P31224	acrB	P24180	acrE
P24177	acrD	P24180	acrE
P0AE06	acrA	P24180	acrE
P31224	acrB	P24181	acrF
P24177	acrD	P24181	acrF
P0AE06	acrA	P24181	acrF
P0AAW9	acrZ	P24181	acrF
P24180	acrE	P24181	acrF
P77674	prr	P37685	aldB
P62399	rplE	P0A9W3	ettA
P0A7L0	rplA	P0A9W3	ettA
P02359	rpsG	P0A9W3	ettA
P42914	yraI	P75857	elfC
P36659	cbpA	P08622	dnaJ
P0A7L0	rplA	P0A6N4	efp
P02359	rpsG	P0A6N4	efp
P0A8N7	epmA	P0A6N4	efp
P0CE47	tufA	P0CE48	tufB
P0AG55	rplF	P0A6M8	fusA
P0A7K2	rplL	P0A6M8	fusA
P0AEJ6	eutB	P19636	eutC
P77733	focB	P0AC23	focA
P0ABK5	cysK	P16703	cysM
P0A9X9	cspA	P0A982	cspH
P36995	cspB	P0A982	cspH
P52076	qseB	P0ACZ8	cusR
P0A9Q1	arcA	P0ACZ8	cusR
P52108	rstA	P08368	creB
P52076	qseB	P08368	creB
P0A9Q1	arcA	P08368	creB
P0ACZ8	cusR	P08368	creB
Q46897	casE	P76632	casB
Q46899	casC	P76632	casB
Q46898	casD	Q46901	casA
Q46899	casC	Q46901	casA
P76632	casB	Q46901	casA
P0A9X9	cspA	P0A9Y6	cspC
P36995	cspB	P0A9Y6	cspC
P0A982	cspH	P0A9Y6	cspC
P0A9X9	cspA	P0A968	cspD
P36995	cspB	P0A968	cspD
P0A982	cspH	P0A968	cspD
P0A9Y6	cspC	P0A968	cspD
P0A9X9	cspA	P0A972	cspE
P36995	cspB	P0A972	cspE
P0A982	cspH	P0A972	cspE
P0A9Y6	cspC	P0A972	cspE
P0A968	cspD	P0A972	cspE
P0A9X9	cspA	P0A976	cspF
P36995	cspB	P0A976	cspF
P0A982	cspH	P0A976	cspF
P0A9Y6	cspC	P0A976	cspF
P0A968	cspD	P0A976	cspF
P0A972	cspE	P0A976	cspF
P0A9X9	cspA	P0A986	cspI
P36995	cspB	P0A986	cspI
P0A982	cspH	P0A986	cspI
P0A9Y6	cspC	P0A986	cspI
P0A968	cspD	P0A986	cspI
P0A972	cspE	P0A986	cspI
P0A976	cspF	P0A986	cspI
P0A9X9	cspA	P0A978	cspG
P36995	cspB	P0A978	cspG
P0A982	cspH	P0A978	cspG
P0A9Y6	cspC	P0A978	cspG
P0A968	cspD	P0A978	cspG
P0A972	cspE	P0A978	cspG
P0A976	cspF	P0A978	cspG
P0A986	cspI	P0A978	cspG
P00968	carB	P0A6F1	carA
P77674	prr	P17445	betB
P37685	aldB	P17445	betB
Q47083	cbl	P0A9F3	cysB
P0A6A8	acpP	P0A6Q3	fabA
P0A6Q3	fabA	P0A953	fabB
P0A6A8	acpP	P0A6Q6	fabZ
P76540	eutK	P0ABF4	eutM
P76540	eutK	P0AEJ8	eutN
P0ABF4	eutM	P0AEJ8	eutN
P0A9B6	epd	P0A9B2	gapA
P76461	atoB	P21177	fadB
P0AAB2	wzb	P0ACZ2	etp
P76461	atoB	P21151	fadA
P21177	fadB	P21151	fadA
P0A7Z4	rpoA	P0ACJ8	crp
Q46925	csdA	P0AGF2	csdE
P0AAF6	artP	P16676	cysA
P38054	cusA	P77239	cusB
P52108	rstA	P0AE88	cpxR
P52076	qseB	P0AE88	cpxR
P0A9Q1	arcA	P0AE88	cpxR
P0ACZ8	cusR	P0AE88	cpxR
P08368	creB	P0AE88	cpxR
P0ACF4	hupB	P0ACF0	hupA
P0ABI8	cyoB	P0ABJ1	cyoA
P0ABI8	cyoB	P0ABJ3	cyoC
P31068	fliH	P52612	fliI
P0A6M2	dsbB	P0AEG4	dsbA
P10443	dnaE	P03007	dnaQ
P10443	dnaE	P0A988	dnaN
P03007	dnaQ	P0A988	dnaN
P0ABY4	fldB	P61949	fldA
P52108	rstA	P30843	basR
P52076	qseB	P30843	basR
P08368	creB	P30843	basR
P0AE88	cpxR	P30843	basR
P24182	accC	P0ABD8	accB
P52108	rstA	P69228	baeR
P0ACZ8	cusR	P69228	baeR
P08368	creB	P69228	baeR
P0A937	bamE	P0AC02	bamD
P0A903	bamC	P0AC02	bamD
P0A6F5	groL	P0A6F9	groS
P0AE67	cheY	P0A9H9	cheZ
P0AEK7	fdnI	P0AAJ5	fdoH
P0A698	uvrA	P07821	fhuC
P37686	yiaY	P0A9S1	fucO
P02929	tonB	P06971	fhuA
P42914	yraI	P04128	fimA
P0A698	uvrA	P23878	fepC
P16676	cysA	P37009	fbpC
P0A698	uvrA	P15031	fecE
P0AAJ5	fdoH	P32176	fdoG
P0AEK7	fdnI	P0AAJ3	fdnH
P32176	fdoG	P0AAJ3	fdnH
P75857	elfC	P31697	fimC
P04128	fimA	P31697	fimC
P0AAJ5	fdoH	P0AEL0	fdoI
P0AAJ3	fdnH	P0AEL0	fdoI
P75857	elfC	P08190	fimG
P27248	gcvT	P0A6T9	gcvH
P61175	rplV	P0AD89	tnaC
P0A6T9	gcvH	P32099	lplA
P00363	frdA	P0AC47	frdB
P0A8Q3	frdD	P0AC47	frdB
P00363	frdA	P0A8Q0	frdC
P0A8Q3	frdD	P0A8Q0	frdC
P0AC47	frdB	P0A8Q0	frdC
P0ADY7	rplP	P0A705	infB
P0ADY3	rplN	P0A705	infB
P0A6A8	acpP	P21645	lpxD
P0AG55	rplF	P42641	obgE
P39099	degQ	P06996	ompC
P39099	degQ	P77747	ompN
P06996	ompC	P77747	ompN
P52108	rstA	P0AA16	ompR
P52076	qseB	P0AA16	ompR
P0A9Q1	arcA	P0AA16	ompR
P0ACZ8	cusR	P0AA16	ompR
P08368	creB	P0AA16	ompR
P0AE88	cpxR	P0AA16	ompR
P30843	basR	P0AA16	ompR
P69228	baeR	P0AA16	ompR
Q46802	ygeV	P0AFB8	glnG
Q06065	atoC	P0AFB8	glnG
P0AFE4	nuoK	P0AFC3	nuoA
P0ACZ8	cusR	P0AFJ5	phoB
P08368	creB	P0AFJ5	phoB
P0AE88	cpxR	P0AFJ5	phoB
P69228	baeR	P0AFJ5	phoB
P0AA16	ompR	P0AFJ5	phoB
P52076	qseB	P23836	phoP
P0ACZ8	cusR	P23836	phoP
P08368	creB	P23836	phoP
P30843	basR	P23836	phoP
P0AA16	ompR	P23836	phoP
P0AFJ5	phoB	P23836	phoP
P39099	degQ	P02931	ompF
P06996	ompC	P02931	ompF
P77747	ompN	P02931	ompF
P06960	argF	P04391	argI
P0A855	tolB	P0A912	pal
P0AFE4	nuoK	P0AFE8	nuoM
P0A9K1	phoH	P0A9K3	ybeZ
P0A7R5	rpsJ	P0A780	nusB
P0CE47	tufA	P0A6P1	tsf
P0CE48	tufB	P0A6P1	tsf
P75857	elfC	P75856	elfD
P04128	fimA	P75856	elfD
P31697	fimC	P75856	elfD
P78055	fsaA	P32669	fsaB
P21179	katE	P0A6X3	hfq
P69681	amtB	P0AC55	glnK
P52076	qseB	P21866	kdpE
P0ACZ8	cusR	P21866	kdpE
P08368	creB	P21866	kdpE
P30843	basR	P21866	kdpE
P0AFJ5	phoB	P21866	kdpE
P23836	phoP	P21866	kdpE
P0A6H1	clpX	P0A6H5	hslU
P0ACF4	hupB	P0A6X7	ihfA
Q46896	ygbT	P0A6X7	ihfA
P0ACF0	hupA	P0A6X7	ihfA
P08142	ilvB	P00893	ilvI
P06710	dnaX	P28630	holA
P0A988	dnaN	P28630	holA
P52076	qseB	P76340	hprR
P0ACZ8	cusR	P76340	hprR
P08368	creB	P76340	hprR
P0AE88	cpxR	P76340	hprR
P30843	basR	P76340	hprR
P0AA16	ompR	P76340	hprR
P23836	phoP	P76340	hprR
P21866	kdpE	P76340	hprR
P0A6H1	clpX	P0A7B8	hslV
P0A6H5	hslU	P0A7B8	hslV
P30860	artJ	P0AEU0	hisJ
P09551	argT	P0AEU0	hisJ
P03007	dnaQ	P0ABS8	holE
P77580	mhpF	P51020	mhpE
P06710	dnaX	P28631	holB
P28630	holA	P28631	holB
P28905	holC	P28632	holD
P69681	amtB	P0A9Z1	glnB
P0AC55	glnK	P0A9Z1	glnB
P0A9T8	ybbA	P0AAG3	gltL
P0AAF6	artP	P0AAG3	gltL
P16676	cysA	P0AAG3	gltL
P0A9T8	ybbA	P10346	glnQ
P0AAF6	artP	P10346	glnQ
P16676	cysA	P10346	glnQ
P0AAG3	gltL	P10346	glnQ
P0ACN4	allR	P16528	iclR
P11071	aceK	P08200	icd
P0A9T8	ybbA	P07109	hisP
P0AAF6	artP	P07109	hisP
P16676	cysA	P07109	hisP
P0AAG3	gltL	P07109	hisP
P10346	glnQ	P07109	hisP
Q46915	gudX	P0AES2	gudD
P24193	hypE	P30131	hypF
P11350	narI	P11349	narH
P11350	narI	P19318	narY
P11350	narI	P19319	narZ
P11349	narH	P19319	narZ
P19318	narY	P19319	narZ
P0A9T8	ybbA	P75957	lolD
P0AAG3	gltL	P75957	lolD
P10346	glnQ	P75957	lolD
P07109	hisP	P75957	lolD
P31554	lptD	P0ADC1	lptE
P23843	oppA	P77348	mppA
P11349	narH	P0AF32	narV
P19318	narY	P0AF32	narV
P19319	narZ	P0AF32	narV
P0ABL3	napB	P33937	napA
P39099	degQ	P21420	nmpC
P06996	ompC	P21420	nmpC
P77747	ompN	P21420	nmpC
P02931	ompF	P21420	nmpC
Q46802	ygeV	P37013	norR
Q06065	atoC	P37013	norR
P0AFB8	glnG	P37013	norR
P11350	narI	P09152	narG
P11349	narH	P09152	narG
P19318	narY	P09152	narG
P0AF32	narV	P09152	narG
P16676	cysA	P69874	potA
P37009	fbpC	P69874	potA
P10346	glnQ	P69874	potA
P0A7I0	prfA	P0ACC1	prmC
P76077	paaA	P76078	paaB
P77324	paoB	P77165	paoA
P77324	paoB	P77489	paoC
P77165	paoA	P77489	paoC
P0A8H8	yacG	P0AFI2	parC
P20083	parE	P0AFI2	parC
P76077	paaA	P76079	paaC
P76078	paaB	P76079	paaC
P0A9T8	ybbA	P14175	proV
P0AAG3	gltL	P14175	proV
P10346	glnQ	P14175	proV
P07109	hisP	P14175	proV
P75957	lolD	P14175	proV
P0AFB1	nlpI	P23865	prc
P33021	nupX	P33024	psuT
P04335	frsA	P69783	crr
P10346	glnQ	P69783	crr
Q46802	ygeV	P37344	pspF
Q06065	atoC	P37344	pspF
P0AFB8	glnG	P37344	pspF
P37013	norR	P37344	pspF
P0AFX4	rsd	P0AA04	ptsH
P08839	ptsI	P0AA04	ptsH
P69783	crr	P0AA04	ptsH
P77467	paaG	P76082	paaF
P00895	trpE	P00903	pabA
P0AB67	pntB	P07001	pntA
P0AC86	glgP	P00490	malP
P0AFE4	nuoK	P33607	nuoL
P0AFE8	nuoM	P33607	nuoL
P0AFE4	nuoK	P0AFF0	nuoN
P0AFC3	nuoA	P0AFF0	nuoN
P0AFE8	nuoM	P0AFF0	nuoN
P33607	nuoL	P0AFF0	nuoN
P0A7R5	rpsJ	P0AFF6	nusA
P39099	degQ	P02932	phoE
P06996	ompC	P02932	phoE
P77747	ompN	P02932	phoE
P02931	ompF	P02932	phoE
P21420	nmpC	P02932	phoE
P0AFC7	nuoB	P31979	nuoF
P0AFC7	nuoB	P0AFD4	nuoH
P0AFC7	nuoB	P0AFD6	nuoI
P0AFD4	nuoH	P0AFD6	nuoI
P0AFE4	nuoK	P0AFE0	nuoJ
P0AFC3	nuoA	P0AFE0	nuoJ
P0AFE8	nuoM	P0AFE0	nuoJ
P33607	nuoL	P0AFE0	nuoJ
P0AFF0	nuoN	P0AFE0	nuoJ
P0AFC7	nuoB	P33599	nuoC
P0AFD4	nuoH	P33599	nuoC
P0AFD6	nuoI	P33599	nuoC
P0ACQ0	rbsR	P0ACP7	purR
P77674	prr	P23883	puuC
P37685	aldB	P23883	puuC
P17445	betB	P23883	puuC
P25526	gabD	P23883	puuC
P75745	pxpC	P0AAV4	pxpB
P0A7F3	pyrI	P0A786	pyrB
P77526	yfcG	Q46845	yghU
P0A932	gfcE	P0A930	wza
P76461	atoB	Q46939	yqeF
P21177	fadB	Q46939	yqeF
P21151	fadA	Q46939	yqeF
P45532	tusD	P45530	tusB
P00509	aspC	P04693	tyrB
P16676	cysA	P77795	ydcT
P37009	fbpC	P77795	ydcT
P69874	potA	P77795	ydcT
P14175	proV	P77795	ydcT
P39099	degQ	P77519	yddL
P06996	ompC	P77519	yddL
P77747	ompN	P77519	yddL
P02931	ompF	P77519	yddL
P21420	nmpC	P77519	yddL
P02932	phoE	P77519	yddL
P0A6G3	pncC	P31131	ydeJ
P42914	yraI	P77588	ydeQ
P75857	elfC	P77588	ydeQ
P31697	fimC	P77588	ydeQ
P08190	fimG	P77588	ydeQ
P75856	elfD	P77588	ydeQ
P75857	elfC	P77294	ydeR
P77588	ydeQ	P77294	ydeR
P42914	yraI	P76137	ydeT
P31697	fimC	P76137	ydeT
P08190	fimG	P76137	ydeT
P75856	elfD	P76137	ydeT
P77588	ydeQ	P76137	ydeT
P77294	ydeR	P76137	ydeT
P21866	kdpE	P39901	ybfI
P77368	ybcL	P12994	ybhB
P10346	glnQ	P77481	ycjV
P69874	potA	P77481	ycjV
P14175	proV	P77481	ycjV
P69783	crr	P77481	ycjV
P77795	ydcT	P77481	ycjV
P39099	degQ	P76335	yedS
P06996	ompC	P76335	yedS
P77747	ompN	P76335	yedS
P02931	ompF	P76335	yedS
P21420	nmpC	P76335	yedS
P02932	phoE	P76335	yedS
P77519	yddL	P76335	yedS
P69348	yoeB	P69346	yefM
P0ADQ5	yiiE	P0AFU6	yiiF
P76256	tsaB	P05852	tsaD
P45532	tusD	P45531	tusC
P45530	tusB	P45531	tusC
P37769	kduD	P76633	ygcW
P65292	ygdI	P65294	ygdR
P23843	oppA	Q46863	ygiS
P77348	mppA	Q46863	ygiS
P76461	atoB	P0C7L2	paaJ
P21177	fadB	P0C7L2	paaJ
P21151	fadA	P0C7L2	paaJ
Q46939	yqeF	P0C7L2	paaJ
P0A790	panD	P37613	panZ
Q46802	ygeV	P77743	prpR
Q06065	atoC	P77743	prpR
P0AFB8	glnG	P77743	prpR
P37013	norR	P77743	prpR
P37344	pspF	P77743	prpR
P0AA04	ptsH	P69791	chbA
P69791	chbA	P69795	chbB
P04993	recD	P07648	recC
P08394	recB	P07648	recC
P36675	arfA	P07012	prfB
P22256	gabT	P50457	puuE
P0AGL2	tdcF	P0AF93	ridA
P0ADY7	rplP	P0AG20	relA
P0A7U3	rpsS	P0AG20	relA
P69924	nrdB	P00452	nrdA
P39452	nrdE	P37146	nrdF
P0A772	nrdI	P37146	nrdF
P0A7K2	rplL	P0A7J7	rplK
P0A7J3	rplJ	P0A7J7	rplK
P0A6M8	fusA	P0A7J7	rplK
P25519	hflX	P0A7J7	rplK
P32132	typA	P0A7J7	rplK
P07012	prfB	P0A7J7	rplK
P42630	tdcG	P30744	sdaB
P0AGE9	sucD	P0A836	sucC
P77499	sufC	P77522	sufB
P77499	sufC	P77689	sufD
P77522	sufB	P77689	sufD
Q46925	csdA	P77444	sufS
P0AGF2	csdE	P77444	sufS
P33570	tktB	P27302	tktA
P0AFK0	pmbA	P0AGG8	tldD
P13482	treA	P62601	treF
P0AGI8	trkA	P23849	trkG
P0AGI8	trkA	P0AFZ7	trkH
P23849	trkG	P0AFZ7	trkH
O32583	thiS	P30138	thiF
P0A870	talB	P0A867	talA
P0A7W7	rpsH	P0A7W1	rpsE
P0A7R1	rplI	P02358	rpsF
P60422	rplB	P02358	rpsF
P42630	tdcG	P16095	sdaA
P30744	sdaB	P16095	sdaA
P02359	rpsG	P0A7R9	rpsK
P0A7W7	rpsH	P0AG63	rpsQ
P0A8V2	rpoB	P0A7T7	rpsR
P02358	rpsF	P0A7T7	rpsR
P0A7R9	rpsK	P0A7T7	rpsR
P0A7R5	rpsJ	P0AG59	rpsN
P0A7N1	ykgM	P0AG59	rpsN
P0A7M9	rpmE	P0AG59	rpsN
P0A7U3	rpsS	P0AG59	rpsN
P0A8T7	rpoC	P0A7V0	rpsB
P0A7W7	rpsH	P0A7V0	rpsB
P0AG67	rpsA	P0A7V0	rpsB
P0A7L8	rpmA	P0A805	frr
P0A6M8	fusA	P0A805	frr
P0A7R5	rpsJ	P0A7V3	rpsC
P0A7W1	rpsE	P0A7V3	rpsC
P0A7R9	rpsK	P0A7V3	rpsC
P0AG59	rpsN	P0A7V3	rpsC
P60422	rplB	P0A7V8	rpsD
P0A7W1	rpsE	P0A7V8	rpsD
P02358	rpsF	P0A7V8	rpsD
P36675	arfA	P0A7S3	rpsL
P0A6M8	fusA	P0A7S3	rpsL
P69222	infA	P0A7S3	rpsL
P0A705	infB	P0A7S3	rpsL
P32132	typA	P0A7S3	rpsL
P0AG63	rpsQ	P0A7S3	rpsL
P0A805	frr	P0A7S3	rpsL
P62399	rplE	P0A7S9	rpsM
P0A7N1	ykgM	P0A7S9	rpsM
P0A7M9	rpmE	P0A7S9	rpsM
P0A7U3	rpsS	P0A7S9	rpsM
P02359	rpsG	P0A7X3	rpsI
P0AD49	raiA	P0A7X3	rpsI
P0A7S3	rpsL	P39286	rsgA
P0AGA2	secY	P0AG96	secE
P0AC47	frdB	P0AC41	sdhA
P0A8Q0	frdC	P0AC41	sdhA
P00634	phoA	P0AG86	secB
P0AGA2	secY	P0AG99	secG
P0A7R9	rpsK	P68679	rpsU
P0A7T7	rpsR	P68679	rpsU
P0A7V0	rpsB	P68679	rpsU
P0A7V3	rpsC	P68679	rpsU
P00363	frdA	P64559	sdhE
P0AC41	sdhA	P64559	sdhE
P10346	glnQ	Q47538	tauB
P69783	crr	Q47538	tauB
P77481	ycjV	Q47538	tauB
P0A7M6	rpmC	P0AGD7	ffh
P0ADZ0	rplW	P0AGD7	ffh
P10121	ftsY	P0AGD7	ffh
P0ACF8	hns	P0ACG1	stpA
P0AAC8	iscA	P77667	sufA
P0A8N3	lysS	P0A8N5	lysU
P00448	sodA	P0AGD3	sodB
P07395	pheT	P08312	pheS
P0A9P4	trxB	P0AA25	trxA
P17854	cysH	P0AA25	trxA
P42914	yraI	P77789	ydeS
P75857	elfC	P77789	ydeS
P31697	fimC	P77789	ydeS
P08190	fimG	P77789	ydeS
P75856	elfD	P77789	ydeS
P77294	ydeR	P77789	ydeS
P76137	ydeT	P77789	ydeS
P0A8S9	flhD	P76204	ydiV
P0AB74	kbaY	P77704	ydjI
P0A9T8	ybbA	P37774	yecC
P0AAF6	artP	P37774	yecC
P16676	cysA	P37774	yecC
P0AAG3	gltL	P37774	yecC
P10346	glnQ	P37774	yecC
P07109	hisP	P37774	yecC
P75957	lolD	P37774	yecC
P69874	potA	P37774	yecC
P77599	yfcS	P75749	ybgP
P0A6B7	iscS	P0A890	tusA
P37679	sgbU	P39305	ulaE
Q47150	dinJ	Q47149	yafQ
P76364	cbeA	Q47684	yafW
P39359	yjhH	P75682	yagE
P76364	cbeA	P37008	yagB
Q47208	fdrA	P77187	yahF
P10346	glnQ	P10907	ugpC
P14175	proV	P10907	ugpC
P69783	crr	P10907	ugpC
P77795	ydcT	P10907	ugpC
P77481	ycjV	P10907	ugpC
Q47538	tauB	P10907	ugpC
P37678	sgbH	P39304	ulaD
P0AGA2	secY	P10408	secA
P09373	pflB	P42632	tdcE
P00363	frdA	P07014	sdhB
P0AC41	sdhA	P07014	sdhB
P0A6A3	ackA	P11868	tdcD
P69428	tatA	P0A843	tatE
P42914	yraI	P0ABW5	sfmA
P04128	fimA	P0ABW5	sfmA
P31697	fimC	P0ABW5	sfmA
P75856	elfD	P0ABW5	sfmA
P75857	elfC	P77249	sfmC
P04128	fimA	P77249	sfmC
P31697	fimC	P77249	sfmC
P75856	elfD	P77249	sfmC
P77588	ydeQ	P77249	sfmC
P76137	ydeT	P77249	sfmC
P77789	ydeS	P77249	sfmC
P0ABW5	sfmA	P77249	sfmC
P42914	yraI	P77468	sfmD
P31697	fimC	P77468	sfmD
P08190	fimG	P77468	sfmD
P75856	elfD	P77468	sfmD
P77588	ydeQ	P77468	sfmD
P77294	ydeR	P77468	sfmD
P77789	ydeS	P77468	sfmD
P77249	sfmC	P77468	sfmD
P77196	yfcU	P76655	yqiG
Q46802	ygeV	P14375	zraR
Q06065	atoC	P14375	zraR
P0AFB8	glnG	P14375	zraR
P37013	norR	P14375	zraR
P37344	pspF	P14375	zraR
P77743	prpR	P14375	zraR
P50466	aer	P07017	tar
P30748	moaD	P30749	moaE
P10346	glnQ	P02916	malF
P77481	ycjV	P02916	malF
Q47538	tauB	P02916	malF
P10907	ugpC	P02916	malF
P50466	aer	P05704	trg
P07017	tar	P05704	trg
P50466	aer	P02942	tsr
P07017	tar	P02942	tsr
P05704	trg	P02942	tsr
O32583	thiS	P12282	moeB
P30138	thiF	P12282	moeB
P0A9T8	ybbA	P30750	metN
P0AAF6	artP	P30750	metN
P0A9R7	ftsE	P30750	metN
P0AAG3	gltL	P30750	metN
P10346	glnQ	P30750	metN
P75957	lolD	P30750	metN
P14175	proV	P30750	metN
P37774	yecC	P30750	metN
P22524	mukE	P60293	mukF
Q46865	mqsR	Q46864	mqsA
P37769	kduD	P0A9P9	idnO
P76633	ygcW	P0A9P9	idnO
P0A6X7	ihfA	P0A6Y1	ihfB
P0A6B7	iscS	P0ACD4	iscU
P52095	ldcC	P0A9H3	cadA
P0AG55	rplF	P60785	lepA
P0A7R1	rplI	P60785	lepA
P0A7J7	rplK	P60785	lepA
P0A7S3	rpsL	P60785	lepA
P64578	higB	P67701	higA
P23874	hipA	P23873	hipB
P66817	diaA	P63224	gmhA
P69783	crr	P0A6F3	glpK
P39208	idnK	P46859	gntK
Q46802	ygeV	P0AFU4	glrR
Q06065	atoC	P0AFU4	glrR
P0AFB8	glnG	P0AFU4	glrR
P37013	norR	P0AFU4	glrR
P37344	pspF	P0AFU4	glrR
P77743	prpR	P0AFU4	glrR
P14375	zraR	P0AFU4	glrR
P37127	aegA	P09831	gltB
Q46820	ygfT	P09831	gltB
P09832	gltD	P09831	gltB
P23524	garK	P77364	glxK
P36645	hofB	P45759	gspE
P0A988	dnaN	P69931	hda
P77161	glxR	P0ABQ2	garR
P0ACD8	hyaB	P0ACE0	hybC
P0AAM1	hyaC	P69739	hyaA
P0ACD8	hyaB	P69739	hyaA
P0ACE0	hybC	P69739	hyaA
P0AEZ3	minD	P0A734	minE
P0ACD8	hyaB	P69741	hybO
P0ACE0	hybC	P69741	hybO
P69739	hyaA	P69741	hybO
P0A9T8	ybbA	P75831	macB
P75957	lolD	P75831	macB
P05804	uidA	P0AEX9	malE
P02916	malF	P0AEX9	malE
P10346	glnQ	P68183	malG
P77481	ycjV	P68183	malG
Q47538	tauB	P68183	malG
P10907	ugpC	P68183	malG
P02916	malF	P68183	malG
P0AEX9	malE	P68183	malG
P0A9R7	ftsE	P31547	metI
P30750	metN	P31547	metI
P42914	yraI	P08191	fimH
P75857	elfC	P08191	fimH
P31697	fimC	P08191	fimH
P08190	fimG	P08191	fimH
P75856	elfD	P08191	fimH
P77588	ydeQ	P08191	fimH
P77294	ydeR	P08191	fimH
P76137	ydeT	P08191	fimH
P77249	sfmC	P08191	fimH
P77468	sfmD	P08191	fimH
P0C8K0	kbaZ	P0C8J8	gatZ
P0AAB6	galF	P0AEP3	galU
P76469	rhmA	P23522	garL
P0AAJ5	fdoH	P24183	fdnG
P0AAJ3	fdnH	P24183	fdnG
P0AB74	kbaY	P0C8J6	gatY
P77704	ydjI	P0C8J6	gatY
P42914	yraI	P08189	fimF
P75857	elfC	P08189	fimF
P31697	fimC	P08189	fimF
P08190	fimG	P08189	fimF
P75856	elfD	P08189	fimF
P77294	ydeR	P08189	fimF
P76137	ydeT	P08189	fimF
P77789	ydeS	P08189	fimF
P77249	sfmC	P08189	fimF
P77468	sfmD	P08189	fimF
P0ADX5	yhfG	P20605	fic
P77674	prr	P80668	feaB
P37685	aldB	P80668	feaB
P17445	betB	P80668	feaB
P25526	gabD	P80668	feaB
P23883	puuC	P80668	feaB
P77695	gnsB	P0AC92	gnsA
P0A8H8	yacG	P0AES6	gyrB
P0AFI2	parC	P0AES6	gyrB
P0A8H8	yacG	P0AES4	gyrA
P20083	parE	P0AES4	gyrA
P0AFI2	parC	P0AES4	gyrA
P0AES6	gyrB	P0AES4	gyrA
P45395	kdsD	P17115	gutQ
P50466	aer	P07018	tap
P07017	tar	P07018	tap
P05704	trg	P07018	tap
P02942	tsr	P07018	tap
P0A8Y8	entH	P77781	menI
P16676	cysA	P68187	malK
P37009	fbpC	P68187	malK
P10346	glnQ	P68187	malK
P69874	potA	P68187	malK
P14175	proV	P68187	malK
P69783	crr	P68187	malK
P77795	ydcT	P68187	malK
P77481	ycjV	P68187	malK
Q47538	tauB	P68187	malK
P10907	ugpC	P68187	malK
P02916	malF	P68187	malK
P68183	malG	P68187	malK
P07464	lacA	P77791	maa
P0AE72	mazE	P0AE70	mazF
P02930	tolC	P37636	mdtE
P31224	acrB	P37636	mdtE
P24177	acrD	P37636	mdtE
P0AE06	acrA	P37636	mdtE
P24180	acrE	P37636	mdtE
P24181	acrF	P37636	mdtE
P31224	acrB	P37637	mdtF
P24177	acrD	P37637	mdtF
P0AE06	acrA	P37637	mdtF
P0AAW9	acrZ	P37637	mdtF
P24180	acrE	P37637	mdtF
P24181	acrF	P37637	mdtF
P37636	mdtE	P37637	mdtF
P24169	speF	P21169	speC
P69908	gadA	P69910	gadB
P39099	degQ	P0C0V0	degP
P06996	ompC	P0C0V0	degP
P77747	ompN	P0C0V0	degP
P02931	ompF	P0C0V0	degP
P21420	nmpC	P0C0V0	degP
P02932	phoE	P0C0V0	degP
P77519	yddL	P0C0V0	degP
P76335	yedS	P0C0V0	degP
P39099	degQ	P0AEE3	degS
P0C0V0	degP	P0AEE3	degS
P76015	dhaK	P76014	dhaL
P07014	sdhB	P69054	sdhC
P07014	sdhB	P0AC44	sdhD
P69054	sdhC	P0AC44	sdhD
P0A6Z1	hscA	P0A6Y8	dnaK
P50456	mlc	P0AF20	nagC
P23367	mutL	P23909	mutS

## Sheet: ECOCYC
UniprotID_p1	GeneName_p1	UniprotID_p2	GeneName_p2
P0A7Z4	rpoA	P24255	rpoN
P0A7Z4	rpoA	P0A8T7	rpoC
P24255	rpoN	P0A8T7	rpoC
P0A7Z4	rpoA	P0A8V2	rpoB
P24255	rpoN	P0A8V2	rpoB
P0A8T7	rpoC	P0A8V2	rpoB
P37760	rfbD	P37745	rfbC
P0A877	trpA	P0A879	trpB
P0AF67	tsaE	P76256	tsaB
P33225	torA	P33226	torC
P05719	hsdS	P08957	hsdM
P0A855	tolB	P19934	tolA
P0A855	tolB	P0ABU9	tolQ
P19934	tolA	P0ABU9	tolQ
P0A855	tolB	P0ABV6	tolR
P19934	tolA	P0ABV6	tolR
P0ABU9	tolQ	P0ABV6	tolR
P05719	hsdS	P08956	hsdR
P08957	hsdM	P08956	hsdR
P0AGA2	secY	P0AG90	secD
P75851	ssuC	P75853	ssuA
P75851	ssuC	P0AAI1	ssuB
P75853	ssuA	P0AAI1	ssuB
P52129	rnlA	P52130	rnlB
P0A7Z4	rpoA	P0AGB6	rpoE
P0A8T7	rpoC	P0AGB6	rpoE
P0A8V2	rpoB	P0AGB6	rpoE
P0A7Z4	rpoA	P00579	rpoD
P0A8T7	rpoC	P00579	rpoD
P0A8V2	rpoB	P00579	rpoD
P0A7Z4	rpoA	P13445	rpoS
P0A8T7	rpoC	P13445	rpoS
P0A8V2	rpoB	P13445	rpoS
P0A7Z4	rpoA	P0AGB3	rpoH
P0A8T7	rpoC	P0AGB3	rpoH
P0A8V2	rpoB	P0AGB3	rpoH
P0DMC9	rcsA	P0DMC7	rcsB
P0A7H3	recO	P0A7H6	recR
P23843	oppA	P0AFH2	oppB
P23843	oppA	P0AFH6	oppC
P0AFH2	oppB	P0AFH6	oppC
P23843	oppA	P77737	oppF
P0AFH2	oppB	P77737	oppF
P0AFH6	oppC	P77737	oppF
P21513	rne	P0A8J8	rhlB
P0C077	relE	P0C079	relB
P0A698	uvrA	P0A8F8	uvrB
P10906	ugpE	P10905	ugpA
P0A9T8	ybbA	P77504	ybbP
P33360	yehX	P33362	yehZ
P33913	yejA	P0AFU0	yejB
P45766	yhdW	P45767	yhdX
P77509	yphE	P77269	yphF
P0ABB0	atpA	P0ABB4	atpD
P0ABB0	atpA	P0ABA0	atpF
P0ABB4	atpD	P0ABA0	atpF
P69490	ccmE	P33927	ccmF
P69490	ccmE	P0ABM9	ccmH
P33927	ccmF	P0ABM9	ccmH
P76458	atoD	P76459	atoA
P0ABB0	atpA	P0AB98	atpB
P0ABB4	atpD	P0AB98	atpB
P0ABA0	atpF	P0AB98	atpB
P69490	ccmE	P0ABL8	ccmB
P69490	ccmE	P0ABM5	ccmD
P0ABL8	ccmB	P0ABM5	ccmD
P0ABB0	atpA	P0ABA6	atpG
P0ABB4	atpD	P0ABA6	atpG
P0ABA0	atpF	P0ABA6	atpG
P0AB98	atpB	P0ABA6	atpG
P0ABB0	atpA	P0ABA4	atpH
P0ABB4	atpD	P0ABA4	atpH
P0ABA0	atpF	P0ABA4	atpH
P0AB98	atpB	P0ABA4	atpH
P0ABA6	atpG	P0ABA4	atpH
P0ABB0	atpA	P0A6E6	atpC
P0ABB4	atpD	P0A6E6	atpC
P0ABA0	atpF	P0A6E6	atpC
P0AB98	atpB	P0A6E6	atpC
P0ABA6	atpG	P0A6E6	atpC
P0ABA4	atpH	P0A6E6	atpC
P69490	ccmE	P33931	ccmA
P0ABL8	ccmB	P33931	ccmA
P0ABM5	ccmD	P33931	ccmA
P69490	ccmE	P0ABM1	ccmC
P0ABL8	ccmB	P0ABM1	ccmC
P0ABM5	ccmD	P0ABM1	ccmC
P33931	ccmA	P0ABM1	ccmC
P0ABB0	atpA	P68699	atpE
P0ABB4	atpD	P68699	atpE
P0ABA0	atpF	P68699	atpE
P0AB98	atpB	P68699	atpE
P0ABA6	atpG	P68699	atpE
P0ABA4	atpH	P68699	atpE
P0A6E6	atpC	P68699	atpE
P0ABR7	yeaW	P76254	yeaX
P0ABH9	clpA	P0A6G7	clpP
P0DMC7	rcsB	P39404	bglJ
P02930	tolC	P31224	acrB
P02930	tolC	P24177	acrD
P02930	tolC	P0AE06	acrA
P31224	acrB	P0AE06	acrA
P24177	acrD	P0AE06	acrA
P77463	ddpC	P77622	ddpF
P77463	ddpC	P77308	ddpB
P77622	ddpF	P77308	ddpB
P02929	tonB	P06129	btuB
P30859	artI	P0AE30	artM
P30860	artJ	P0AE30	artM
P30859	artI	P0AAF6	artP
P30860	artJ	P0AAF6	artP
P0AE30	artM	P0AAF6	artP
P30859	artI	P0AE34	artQ
P30860	artJ	P0AE34	artQ
P0AE30	artM	P0AE34	artQ
P0AAF6	artP	P0AE34	artQ
P02924	araF	P0AAF3	araG
P06611	btuD	P37028	btuF
P02924	araF	P0AE26	araH
P0AAF3	araG	P0AE26	araH
Q47377	arnE	P76474	arnF
Q46896	ygbT	P45956	ygbF
Q46898	casD	Q46897	casE
Q46898	casD	Q46899	casC
Q46897	casE	Q46899	casC
P06611	btuD	P06609	btuC
P37028	btuF	P06609	btuC
P76052	abgB	P77357	abgA
P0ABD5	accA	P0A9Q5	accD
P32721	alsA	P39265	alsB
P32721	alsA	P32720	alsC
P39265	alsB	P32720	alsC
P26458	appB	P26459	appC
P46481	aaeB	P46482	aaeA
P0ABD5	accA	P24182	accC
P0A9Q5	accD	P24182	accC
P02930	tolC	P24180	acrE
P02930	tolC	P24181	acrF
P24180	acrE	P24181	acrF
P02929	tonB	P0ABU7	exbB
P06129	btuB	P0ABU7	exbB
P02929	tonB	P0ABV2	exbD
P06129	btuB	P0ABV2	exbD
P0ABU7	exbB	P0ABV2	exbD
P00363	frdA	P0A8Q3	frdD
P0AA89	dosC	P76129	dosP
P02930	tolC	P0AEJ0	emrB
P0ADI4	entB	P10378	entE
P0ADI4	entB	P11454	entF
P10378	entE	P11454	entF
P02930	tolC	P24077	entS
P04994	xseA	P0A8G9	xseB
P18775	dmsA	P18776	dmsB
P18775	dmsA	P18777	dmsC
P18776	dmsB	P18777	dmsC
P0ADI4	entB	P19925	entD
P10378	entE	P19925	entD
P11454	entF	P19925	entD
P0A9R7	ftsE	P0AC30	ftsX
P0AEJ6	eutB	P19636	eutC
P0A940	bamA	P77774	bamB
P0A940	bamA	P0A937	bamE
P77774	bamB	P0A937	bamE
P0AC73	ebgC	P06864	ebgA
P0AG78	sbp	P16701	cysU
P16700	cysP	P16701	cysU
P0AG78	sbp	P0AEB0	cysW
P16700	cysP	P0AEB0	cysW
P16701	cysU	P0AEB0	cysW
P0ABK5	cysK	P0A9D4	cysE
Q46898	casD	P76632	casB
Q46897	casE	P76632	casB
Q46899	casC	P76632	casB
P17846	cysI	P38038	cysJ
P23845	cysN	P21156	cysD
Q46898	casD	Q46901	casA
Q46897	casE	Q46901	casA
Q46899	casC	Q46901	casA
P76632	casB	Q46901	casA
P0AEA2	csgG	P0AE95	csgE
P0ABH9	clpA	P0A6H1	clpX
P0A6G7	clpP	P0A6H1	clpX
P00968	carB	P0A6F1	carA
P0AE08	ahpC	P35340	ahpF
P21513	rne	P0A6P9	eno
P0A8J8	rhlB	P0A6P9	eno
P06136	ftsQ	P0A6S5	ftsB
P21177	fadB	P21151	fadA
P77399	fadJ	P76503	fadI
P0DMC7	rcsB	P63204	gadE
P0ABK2	cydB	P56100	cydX
P0AG78	sbp	P16676	cysA
P16700	cysP	P16676	cysA
P16701	cysU	P16676	cysA
P0AEB0	cysW	P16676	cysA
P38054	cusA	P77214	cusF
P0ABK2	cydB	P0ABJ9	cydA
P56100	cydX	P0ABJ9	cydA
P38054	cusA	P77239	cusB
P77214	cusF	P77239	cusB
P38054	cusA	P77211	cusC
P77214	cusF	P77211	cusC
P77239	cusB	P77211	cusC
P0ABI8	cyoB	P0ABJ6	cyoD
P0ACF4	hupB	P0ACF0	hupA
P0ABI8	cyoB	P0ABJ1	cyoA
P0ABJ6	cyoD	P0ABJ1	cyoA
P0ABI8	cyoB	P0ABJ3	cyoC
P0ABJ6	cyoD	P0ABJ3	cyoC
P0ABJ1	cyoA	P0ABJ3	cyoC
P69490	ccmE	P0AA86	dsbE
P33927	ccmF	P0AA86	dsbE
P0ABM9	ccmH	P0AA86	dsbE
P0ABS5	dnaG	P0A8J2	dnaT
P0AEF8	dppB	P0AEG1	dppC
P0AEF8	dppB	P0AAG0	dppD
P0AEG1	dppC	P0AAG0	dppD
P0AEF8	dppB	P37313	dppF
P0AEG1	dppC	P37313	dppF
P0AAG0	dppD	P37313	dppF
P0ABY7	flhC	P0A8S9	flhD
P0AEF8	dppB	P23847	dppA
P0AEG1	dppC	P23847	dppA
P0AAG0	dppD	P23847	dppA
P37313	dppF	P23847	dppA
P0A7Z4	rpoA	P0AEM6	fliA
P0A8T7	rpoC	P0AEM6	fliA
P0A8V2	rpoB	P0AEM6	fliA
P06710	dnaX	P10443	dnaE
P06710	dnaX	P03007	dnaQ
P10443	dnaE	P03007	dnaQ
P06710	dnaX	P0A988	dnaN
P10443	dnaE	P0A988	dnaN
P03007	dnaQ	P0A988	dnaN
P0A940	bamA	P0A903	bamC
P77774	bamB	P0A903	bamC
P0A937	bamE	P0A903	bamC
P0ABD5	accA	P0ABD8	accB
P0A9Q5	accD	P0ABD8	accB
P24182	accC	P0ABD8	accB
P37653	bcsA	P37652	bcsB
P0A940	bamA	P0AC02	bamD
P77774	bamB	P0AC02	bamD
P0A937	bamE	P0AC02	bamD
P0A903	bamC	P0AC02	bamD
P0A6F5	groL	P0A6F9	groS
P08365	chpS	P33647	chpB
P02929	tonB	P05825	fepA
P0ABU7	exbB	P05825	fepA
P0ABV2	exbD	P05825	fepA
P06136	ftsQ	P0AEN4	ftsL
P0A6S5	ftsB	P0AEN4	ftsL
P33195	gcvP	P27248	gcvT
P0AEL6	fepB	P23876	fepD
P02929	tonB	P06971	fhuA
P0ABU7	exbB	P06971	fhuA
P0ABV2	exbD	P06971	fhuA
P0AEL6	fepB	P23878	fepC
P23876	fepD	P23878	fepC
P02929	tonB	P13036	fecA
P0ABU7	exbB	P13036	fecA
P0ABV2	exbD	P13036	fecA
P23485	fecR	P13036	fecA
P0A7Z4	rpoA	P23484	fecI
P0A8T7	rpoC	P23484	fecI
P0A8V2	rpoB	P23484	fecI
P0AAJ5	fdoH	P32176	fdoG
P15031	fecE	P15028	fecB
P15031	fecE	P15029	fecD
P15028	fecB	P15029	fecD
P0AAJ5	fdoH	P0AEL0	fdoI
P32176	fdoG	P0AEL0	fdoI
P04128	fimA	P08190	fimG
P33195	gcvP	P0A6T9	gcvH
P27248	gcvT	P0A6T9	gcvH
P0A6A6	leuC	P30126	leuD
P22731	livF	P0AEX7	livH
P22731	livF	P22729	livM
P0AEX7	livH	P22729	livM
P22731	livF	P0AD96	livJ
P0AEX7	livH	P0AD96	livJ
P22729	livM	P0AD96	livJ
P22731	livF	P04816	livK
P0AEX7	livH	P04816	livK
P22729	livM	P04816	livK
P0ADV9	lptC	P0ADC6	lptG
P0ADV9	lptC	P0AF98	lptF
P0ADC6	lptG	P0AF98	lptF
P0ADV9	lptC	P0ADV1	lptA
P0ADC6	lptG	P0ADV1	lptA
P0AF98	lptF	P0ADV1	lptA
P0AFG3	sucA	P0A9P0	lpdA
P06959	aceF	P0A9P0	lpdA
P33195	gcvP	P0A9P0	lpdA
P27248	gcvT	P0A9P0	lpdA
P0A6T9	gcvH	P0A9P0	lpdA
P00363	frdA	P0AC47	frdB
P0A8Q3	frdD	P0AC47	frdB
P00363	frdA	P0A8Q0	frdC
P0A8Q3	frdD	P0A8Q0	frdC
P0AC47	frdB	P0A8Q0	frdC
P22731	livF	P0A9S7	livG
P0AEX7	livH	P0A9S7	livG
P22729	livM	P0A9S7	livG
P0AD96	livJ	P0A9S7	livG
P04816	livK	P0A9S7	livG
P75958	lolE	P0ADC3	lolC
P77858	hyfC	P77437	hyfF
P0ADV9	lptC	P31554	lptD
P0ADC6	lptG	P31554	lptD
P0AF98	lptF	P31554	lptD
P0ADV1	lptA	P31554	lptD
P0ADV9	lptC	P0A9V1	lptB
P0ADC6	lptG	P0A9V1	lptB
P0AF98	lptF	P0A9V1	lptB
P0ADV1	lptA	P0A9V1	lptB
P31554	lptD	P0A9V1	lptB
P0AFG3	sucA	P0AFG6	sucB
P0A9P0	lpdA	P0AFG6	sucB
P23843	oppA	P76027	oppD
P0AFH2	oppB	P76027	oppD
P0AFH6	oppC	P76027	oppD
P77737	oppF	P76027	oppD
P76343	msrQ	P76342	msrP
P06959	aceF	P0AFG8	aceE
P0A9P0	lpdA	P0AFG8	aceE
P28903	nrdD	P0A9N8	nrdG
P0AAK7	nrfC	P32709	nrfD
P0A855	tolB	P02931	ompF
P0A855	tolB	P0A912	pal
P19934	tolA	P0A912	pal
P0ABU9	tolQ	P0A912	pal
P0ABV6	tolR	P0A912	pal
P0A7R5	rpsJ	P0A780	nusB
P02930	tolC	P27303	emrA
P0AEJ0	emrB	P27303	emrA
P02930	tolC	P52599	emrK
P02930	tolC	P52600	emrY
P52599	emrK	P52600	emrY
P0AAI3	ftsH	P0ABC7	hflK
P0AEP9	glcD	P52074	glcF
P77858	hyfC	P23481	hyfA
P77437	hyfF	P23481	hyfA
P0AAN3	hypB	P0A700	hypA
P07658	fdhF	P16431	hycE
P07658	fdhF	P16432	hycF
P16431	hycE	P16432	hycF
P77858	hyfC	P23482	hyfB
P77437	hyfF	P23482	hyfB
P23481	hyfA	P23482	hyfB
P77858	hyfC	P77416	hyfD
P77437	hyfF	P77416	hyfD
P23481	hyfA	P77416	hyfD
P23482	hyfB	P77416	hyfD
P36937	kdpF	P03960	kdpB
P77858	hyfC	P77329	hyfG
P77437	hyfF	P77329	hyfG
P23481	hyfA	P77329	hyfG
P23482	hyfB	P77329	hyfG
P77416	hyfD	P77329	hyfG
P08142	ilvB	P0ADF8	ilvN
P06710	dnaX	P28630	holA
P10443	dnaE	P28630	holA
P03007	dnaQ	P28630	holA
P0A988	dnaN	P28630	holA
P36937	kdpF	P03959	kdpA
P03960	kdpB	P03959	kdpA
P0A6H5	hslU	P0A7B8	hslV
P36937	kdpF	P03961	kdpC
P03960	kdpB	P03961	kdpC
P03959	kdpA	P03961	kdpC
P75796	gsiA	P75798	gsiC
P75796	gsiA	P75799	gsiD
P75798	gsiC	P75799	gsiD
P60664	hisF	P60595	hisH
P09551	argT	P0AEU3	hisM
P09551	argT	P52094	hisQ
P0AEU3	hisM	P52094	hisQ
P0AEU3	hisM	P0AEU0	hisJ
P52094	hisQ	P0AEU0	hisJ
P06710	dnaX	P28905	holC
P10443	dnaE	P28905	holC
P03007	dnaQ	P28905	holC
P0A988	dnaN	P28905	holC
P28630	holA	P28905	holC
P06710	dnaX	P0ABS8	holE
P10443	dnaE	P0ABS8	holE
P03007	dnaQ	P0ABS8	holE
P0A988	dnaN	P0ABS8	holE
P28630	holA	P0ABS8	holE
P28905	holC	P0ABS8	holE
P06710	dnaX	P28631	holB
P10443	dnaE	P28631	holB
P03007	dnaQ	P28631	holB
P0A988	dnaN	P28631	holB
P28630	holA	P28631	holB
P28905	holC	P28631	holB
P0ABS8	holE	P28631	holB
P06710	dnaX	P28632	holD
P10443	dnaE	P28632	holD
P03007	dnaQ	P28632	holD
P0A988	dnaN	P28632	holD
P28630	holA	P28632	holD
P28905	holC	P28632	holD
P0ABS8	holE	P28632	holD
P28631	holB	P28632	holD
P0AER3	gltJ	P0AAG3	gltL
P0AER3	gltJ	P0AER5	gltK
P0AAG3	gltL	P0AER5	gltK
P0AER3	gltJ	P37902	gltI
P0AAG3	gltL	P37902	gltI
P0AER5	gltK	P37902	gltI
P0AEQ3	glnH	P10346	glnQ
P0AAJ8	hybA	P37180	hybB
P77858	hyfC	P77668	hyfI
P77437	hyfF	P77668	hyfI
P23481	hyfA	P77668	hyfI
P23482	hyfB	P77668	hyfI
P77416	hyfD	P77668	hyfI
P77329	hyfG	P77668	hyfI
P07658	fdhF	P0AAK1	hycB
P16431	hycE	P0AAK1	hycB
P16432	hycF	P0AAK1	hycB
P07658	fdhF	P16430	hycD
P16431	hycE	P16430	hycD
P16432	hycF	P16430	hycD
P0AAK1	hycB	P16430	hycD
P07658	fdhF	P16433	hycG
P16431	hycE	P16433	hycG
P16432	hycF	P16433	hycG
P0AAK1	hycB	P16433	hycG
P16430	hycD	P16433	hycG
P0AAM3	hypC	P24192	hypD
P0AAI3	ftsH	P0ABC3	hflC
P0ABC7	hflK	P0ABC3	hflC
P09551	argT	P07109	hisP
P0AEU3	hisM	P07109	hisP
P52094	hisQ	P07109	hisP
P0AEU0	hisJ	P07109	hisP
P0AB74	kbaY	P0C8K0	kbaZ
P77858	hyfC	P77423	hyfH
P77437	hyfF	P77423	hyfH
P23481	hyfA	P77423	hyfH
P23482	hyfB	P77423	hyfH
P77416	hyfD	P77423	hyfH
P77329	hyfG	P77423	hyfH
P77668	hyfI	P77423	hyfH
P07658	fdhF	P16429	hycC
P16431	hycE	P16429	hycC
P16432	hycF	P16429	hycC
P0AAK1	hycB	P16429	hycC
P16430	hycD	P16429	hycC
P16433	hycG	P16429	hycC
P77858	hyfC	P0AEW1	hyfE
P77437	hyfF	P0AEW1	hyfE
P23481	hyfA	P0AEW1	hyfE
P23482	hyfB	P0AEW1	hyfE
P77416	hyfD	P0AEW1	hyfE
P77329	hyfG	P0AEW1	hyfE
P77668	hyfI	P0AEW1	hyfE
P77423	hyfH	P0AEW1	hyfE
P11350	narI	P11349	narH
P19318	narY	P19319	narZ
P75958	lolE	P75957	lolD
P0ADC3	lolC	P75957	lolD
P0ADV9	lptC	P0ADC1	lptE
P0ADC6	lptG	P0ADC1	lptE
P0AF98	lptF	P0ADC1	lptE
P0ADV1	lptA	P0ADC1	lptE
P31554	lptD	P0ADC1	lptE
P0A9V1	lptB	P0ADC1	lptE
P64604	mlaD	P64606	mlaE
P64604	mlaD	P63386	mlaF
P64606	mlaE	P63386	mlaF
P0AFH2	oppB	P77348	mppA
P0AFH6	oppC	P77348	mppA
P77737	oppF	P77348	mppA
P76027	oppD	P77348	mppA
P19318	narY	P0AF32	narV
P19319	narZ	P0AF32	narV
P0ABL3	napB	P33937	napA
P33594	nikE	P33590	nikA
P06722	mutH	P23367	mutL
P11350	narI	P09152	narG
P11349	narH	P09152	narG
P08201	nirB	P0A9I8	nirD
P33594	nikE	P33593	nikD
P33590	nikA	P33593	nikD
P33594	nikE	P0AFA9	nikC
P33590	nikA	P0AFA9	nikC
P33593	nikD	P0AFA9	nikC
P45464	lpoA	P02918	mrcA
P31134	potG	P31133	potF
P31134	potG	P31135	potH
P31133	potF	P31135	potH
P0AFK6	potC	P69874	potA
P0AFK6	potC	P0AFK4	potB
P69874	potA	P0AFK4	potB
P31134	potG	P0AFL1	potI
P31133	potF	P0AFL1	potI
P31135	potH	P0AFL1	potI
P0AFK6	potC	P0AFK9	potD
P69874	potA	P0AFK9	potD
P0AFK4	potB	P0AFK9	potD
P76077	paaA	P76078	paaB
P77324	paoB	P77165	paoA
P77324	paoB	P77489	paoC
P77165	paoA	P77489	paoC
P20083	parE	P0AFI2	parC
P69801	manY	P69805	manZ
P42909	agaB	P42910	agaC
P42909	agaB	P42911	agaD
P42910	agaC	P42911	agaD
P76077	paaA	P76079	paaC
P76078	paaB	P76079	paaC
P25889	preA	P76440	preT
P0ABS5	dnaG	P07013	priB
P0A8J2	dnaT	P07013	priB
P0ABS5	dnaG	P23862	priC
P0A8J2	dnaT	P23862	priC
P07013	priB	P23862	priC
P21513	rne	P0A7B1	ppk
P0A8J8	rhlB	P0A7B1	ppk
P0A6P9	eno	P0A7B1	ppk
P64594	yhaV	P15373	prlF
P69828	gatA	P37188	gatB
P69828	gatA	P69831	gatC
P37188	gatB	P69831	gatC
P0AAH0	pstB	P0AGH8	pstC
P75905	pgaC	P69432	pgaD
P0AFM2	proX	P14175	proV
P0AFM2	proX	P14176	proW
P14175	proV	P14176	proW
P77272	murP	P69783	crr
P76077	paaA	P76081	paaE
P76078	paaB	P76081	paaE
P76079	paaC	P76081	paaE
P77467	paaG	P76082	paaF
P05041	pabB	P00903	pabA
P21513	rne	P05055	pnp
P0A8J8	rhlB	P05055	pnp
P0A6P9	eno	P05055	pnp
P0A7B1	ppk	P05055	pnp
P0AB67	pntB	P07001	pntA
P0AAL3	napG	P33934	napH
P33594	nikE	P33591	nikB
P33590	nikA	P33591	nikB
P33593	nikD	P33591	nikB
P0AFA9	nikC	P33591	nikB
P16688	phnJ	P16686	phnH
P16679	phnL	P16686	phnH
P16677	phnC	P16682	phnD
P16677	phnC	P0DP69	phnE1
P16682	phnD	P0DP69	phnE1
P16688	phnJ	P16687	phnI
P16679	phnL	P16687	phnI
P16686	phnH	P16687	phnI
P0ABK9	nrfA	P0ABL1	nrfB
P16677	phnC	P0DP70	phnE
P16682	phnD	P0DP70	phnE
P0DP69	phnE1	P0DP70	phnE
P16688	phnJ	P16685	phnG
P16679	phnL	P16685	phnG
P16686	phnH	P16685	phnG
P16687	phnI	P16685	phnG
P0AAH0	pstB	P07654	pstA
P0AGH8	pstC	P07654	pstA
P0AAH0	pstB	P0AG82	pstS
P0AGH8	pstC	P0AG82	pstS
P07654	pstA	P0AG82	pstS
P69816	frwB	P32676	frwD
P69811	fruB	P20966	fruA
P69816	frwB	P32670	ptsA
P32676	frwD	P32670	ptsA
P69808	fryB	P77579	fryC
P32154	frvB	P32155	frvA
P69808	fryB	P77439	fryA
P77579	fryC	P77439	fryA
P69816	frwB	P32672	frwC
P32676	frwD	P32672	frwC
P32670	ptsA	P32672	frwC
P56579	srlA	P56580	srlE
P56579	srlA	P05706	srlB
P56580	srlE	P05706	srlB
P69783	crr	P69786	ptsG
P0A7F3	pyrI	P0A786	pyrB
P45766	yhdW	P45768	yhdY
P45767	yhdX	P45768	yhdY
P45766	yhdW	P45769	yhdZ
P45767	yhdX	P45769	yhdZ
P45768	yhdY	P45769	yhdZ
P0AGA2	secY	P25714	yidC
P0AG90	secD	P25714	yidC
P43667	ygaH	P76630	ygaZ
P37674	yiaM	P37675	yiaN
P37674	yiaM	P37676	yiaO
P37675	yiaN	P37676	yiaO
P76387	wzc	P0A930	wza
P27835	wzyE	P0AAA7	wzxE
P27835	wzyE	P0AG00	wzzE
P0AAA7	wzxE	P0AG00	wzzE
Q46800	xdhB	Q46799	xdhA
P0AGI4	xylH	P37388	xylG
P77374	ynfE	P77783	ynfF
P77374	ynfE	P0AAJ1	ynfG
P77783	ynfF	P0AAJ1	ynfG
P77374	ynfE	P76173	ynfH
P77783	ynfF	P76173	ynfH
P0AAJ1	ynfG	P76173	ynfH
P77509	yphE	P77315	yphD
P77269	yphF	P77315	yphD
P45532	tusD	P45530	tusB
P76108	ydcS	P77795	ydcT
P76108	ydcS	P77156	ydcU
P77795	ydcT	P77156	ydcU
P76108	ydcS	P0AFR9	ydcV
P77795	ydcT	P0AFR9	ydcV
P77156	ydcU	P0AFR9	ydcV
P31808	yciK	P76187	ydhF
P31808	yciK	P76192	ydhV
P76187	ydhF	P76192	ydhV
P33360	yehX	P33359	yehW
P33362	yehZ	P33359	yehW
P33360	yehX	P33361	yehY
P33362	yehZ	P33361	yehY
P33359	yehW	P33361	yehY
P33913	yejA	P33915	yejE
P0AFU0	yejB	P33915	yejE
P33913	yejA	P33916	yejF
P0AFU0	yejB	P33916	yejF
P33915	yejE	P33916	yejF
P77716	ycjP	P77481	ycjV
P69348	yoeB	P69346	yefM
P31808	yciK	Q2EER5	ymjC
P76187	ydhF	Q2EER5	ymjC
P76192	ydhV	Q2EER5	ymjC
P76223	ynjB	P76224	ynjC
P76223	ynjB	P76909	ynjD
P76224	ynjC	P76909	ynjD
P0AGI4	xylH	P37387	xylF
P37388	xylG	P37387	xylF
P0AF67	tsaE	P05852	tsaD
P76256	tsaB	P05852	tsaD
P45532	tusD	P45531	tusC
P45530	tusB	P45531	tusC
P31808	yciK	P64557	ygfM
P76187	ydhF	P64557	ygfM
P76192	ydhV	P64557	ygfM
Q2EER5	ymjC	P64557	ygfM
Q46800	xdhB	Q46801	xdhC
Q46799	xdhA	Q46801	xdhC
P31808	yciK	Q46814	xdhD
P76187	ydhF	Q46814	xdhD
P76192	ydhV	Q46814	xdhD
Q2EER5	ymjC	Q46814	xdhD
P64557	ygfM	Q46814	xdhD
P0A8P6	xerC	P0A8P8	xerD
P0ABS5	dnaG	P17888	priA
P0A8J2	dnaT	P17888	priA
P07013	priB	P17888	priA
P23862	priC	P17888	priA
P05041	pabB	P28305	pabC
P00903	pabA	P28305	pabC
P0AB38	lpoB	P02919	mrcB
P69826	cmtA	P69824	cmtB
P69801	manY	P69797	manX
P69805	manZ	P69797	manX
P42905	agaW	P42904	agaV
P69791	chbA	P69795	chbB
P69791	chbA	P17334	chbC
P69795	chbB	P17334	chbC
P69783	crr	P36672	treB
P04993	recD	P08394	recB
P04993	recD	P07648	recC
P08394	recB	P07648	recC
P0A7H3	recO	P0A7H0	recF
P0A7H6	recR	P0A7H0	recF
P0AGI1	rbsC	P04983	rbsA
P0AGI1	rbsC	P02925	rbsB
P04983	rbsA	P02925	rbsB
P69924	nrdB	P00452	nrdA
P39452	nrdE	P37146	nrdF
P0AGE9	sucD	P0A836	sucC
P77499	sufC	P77522	sufB
P77499	sufC	P77689	sufD
P77522	sufB	P77689	sufD
P0AAH4	sapD	P0AAH8	sapF
P0AAH4	sapD	P0AGH5	sapC
P0AAH8	sapF	P0AGH5	sapC
P0A809	ruvA	P0A812	ruvB
P0A809	ruvA	P0A814	ruvC
P0A812	ruvB	P0A814	ruvC
P13458	sbcC	P0AG76	sbcD
P39321	tamB	P0ADE4	tamA
P0AGA2	secY	P0AG96	secE
P0AG90	secD	P0AG96	secE
P25714	yidC	P0AG96	secE
P0AGA2	secY	P0AG93	secF
P0AG90	secD	P0AG93	secF
P25714	yidC	P0AG93	secF
P0AG96	secE	P0AG93	secF
P0AGA2	secY	P0AG99	secG
P0AG90	secD	P0AG99	secG
P25714	yidC	P0AG99	secG
P0AG96	secE	P0AG99	secG
P0AG93	secF	P0AG99	secG
P0AAH4	sapD	P0AGH3	sapB
P0AAH8	sapF	P0AGH3	sapB
P0AGH5	sapC	P0AGH3	sapB
Q47537	tauA	Q47538	tauB
Q47537	tauA	Q47539	tauC
Q47538	tauB	Q47539	tauC
P10121	ftsY	P0AGD7	ffh
P31549	thiP	P31548	thiQ
P31549	thiP	P31550	thiB
P31548	thiQ	P31550	thiB
P30139	thiG	P30140	thiH
P07395	pheT	P08312	pheS
P00961	glyS	P00960	glyQ
P31808	yciK	P76035	yciW
P76187	ydhF	P76035	yciW
P76192	ydhV	P76035	yciW
Q2EER5	ymjC	P76035	yciW
P64557	ygfM	P76035	yciW
Q46814	xdhD	P76035	yciW
P77716	ycjP	P76042	ycjN
P77481	ycjV	P76042	ycjN
P77716	ycjP	P0AFR7	ycjO
P77481	ycjV	P0AFR7	ycjO
P76042	ycjN	P0AFR7	ycjO
P31808	yciK	P0ACY1	ydjA
P76187	ydhF	P0ACY1	ydjA
P76192	ydhV	P0ACY1	ydjA
Q2EER5	ymjC	P0ACY1	ydjA
P64557	ygfM	P0ACY1	ydjA
Q46814	xdhD	P0ACY1	ydjA
P76035	yciW	P0ACY1	ydjA
P0AEM9	fliY	P37774	yecC
P0AEM9	fliY	P0AFT2	yecS
P37774	yecC	P0AFT2	yecS
P0A9U1	ybhF	P0AFP9	ybhR
P0A9U1	ybhF	P0AFQ2	ybhS
P0AFP9	ybhR	P0AFQ2	ybhS
P52005	torY	P46923	torZ
P04152	umuC	P0AG11	umuD
P69822	ulaB	P69820	ulaC
P31808	yciK	P37440	ucpA
P76187	ydhF	P37440	ucpA
P76192	ydhV	P37440	ucpA
Q2EER5	ymjC	P37440	ucpA
P64557	ygfM	P37440	ucpA
Q46814	xdhD	P37440	ucpA
P76035	yciW	P37440	ucpA
P0ACY1	ydjA	P37440	ucpA
P69822	ulaB	P39301	ulaA
P69820	ulaC	P39301	ulaA
P05847	ttdA	P0AC35	ttdB
P00895	trpE	P00904	trpGD
P36879	yadG	P0AFN6	yadH
Q47150	dinJ	Q47149	yafQ
P0AGA2	secY	P0ADZ7	yajC
P0AG90	secD	P0ADZ7	yajC
P25714	yidC	P0ADZ7	yajC
P0AG96	secE	P0ADZ7	yajC
P0AG93	secF	P0ADZ7	yajC
P0AG99	secG	P0ADZ7	yajC
P10906	ugpE	P0AG80	ugpB
P10905	ugpA	P0AG80	ugpB
P10906	ugpE	P10907	ugpC
P10905	ugpA	P10907	ugpC
P0AG80	ugpB	P10907	ugpC
P69428	tatA	P0A843	tatE
P69428	tatA	P69423	tatC
P0A843	tatE	P69423	tatC
P39365	sgcC	P39363	sgcA
P39365	sgcC	P58035	sgcB
P39363	sgcA	P58035	sgcB
P69428	tatA	P69425	tatB
P0A843	tatE	P69425	tatB
P69423	tatC	P69425	tatB
P37772	yjfF	P39328	ytfT
P37772	yjfF	Q6BEX0	ytfR
P39328	ytfT	Q6BEX0	ytfR
P0A698	uvrA	P0A8G0	uvrC
P0A8F8	uvrB	P0A8G0	uvrC
P39832	znuB	P39172	znuA
P37772	yjfF	P39325	ytfQ
P39328	ytfT	P39325	ytfQ
Q6BEX0	ytfR	P39325	ytfQ
P39832	znuB	P0A9X1	znuC
P39172	znuA	P0A9X1	znuC
P30748	moaD	P30749	moaE
P64604	mlaD	P64602	mlaB
P64606	mlaE	P64602	mlaB
P63386	mlaF	P64602	mlaB
P0A6U3	mnmG	P25522	mnmE
P0AF01	modB	P09833	modC
P76142	lsrB	P77672	lsrC
P0AEZ3	minD	P18196	minC
P22524	mukE	P22523	mukB
P22524	mukE	P60293	mukF
P22523	mukB	P60293	mukF
P0AF01	modB	P37329	modA
P09833	modC	P37329	modA
Q46865	mqsR	Q46864	mqsA
P0A6X7	ihfA	P0A6Y1	ihfB
P00893	ilvI	P00894	ilvH
P31808	yciK	P52062	hemW
P76187	ydhF	P52062	hemW
P76192	ydhV	P52062	hemW
Q2EER5	ymjC	P52062	hemW
P64557	ygfM	P52062	hemW
Q46814	xdhD	P52062	hemW
P76035	yciW	P52062	hemW
P0ACY1	ydjA	P52062	hemW
P37440	ucpA	P52062	hemW
P64578	higB	P67701	higA
P23874	hipA	P23873	hipB
P0ABE2	bolA	P0AC69	grxD
P0A9W6	ibaG	P0AC69	grxD
P0AEQ3	glnH	P0AEQ6	glnP
P10346	glnQ	P0AEQ6	glnP
P0A9C0	glpA	P13033	glpB
P0A9C0	glpA	P0A996	glpC
P13033	glpB	P0A996	glpC
P75796	gsiA	P75797	gsiB
P75798	gsiC	P75797	gsiB
P75799	gsiD	P75797	gsiB
P0ABR5	hcaE	P77650	hcaD
P0ABR5	hcaE	P0ABW0	hcaC
P77650	hcaD	P0ABW0	hcaC
P0ABR5	hcaE	Q47140	hcaF
P77650	hcaD	Q47140	hcaF
P0ABW0	hcaC	Q47140	hcaF
P0AEE5	mglB	P0AAG8	mglA
P30750	metN	P28635	metQ
P0AAJ8	hybA	P0ACE0	hybC
P37180	hybB	P0ACE0	hybC
P15005	mcrB	P15006	mcrC
P32716	mdtN	P32715	mdtO
P32716	mdtN	P32714	mdtP
P32715	mdtO	P32714	mdtP
P76142	lsrB	P77257	lsrA
P77672	lsrC	P77257	lsrA
P76142	lsrB	P0AFS1	lsrD
P77672	lsrC	P0AFS1	lsrD
P77257	lsrA	P0AFS1	lsrD
P0AAJ8	hybA	P69741	hybO
P37180	hybB	P69741	hybO
P0ACE0	hybC	P69741	hybO
P0AA04	ptsH	P0AF10	mtlR
P0AEE5	mglB	P23200	mglC
P0AAG8	mglA	P23200	mglC
P02930	tolC	P75831	macB
P02916	malF	P0AEX9	malE
P02916	malF	P68183	malG
P0AEX9	malE	P68183	malG
P02930	tolC	P76399	mdtC
P02930	tolC	P76397	mdtA
P76399	mdtC	P76397	mdtA
P30750	metN	P31547	metI
P28635	metQ	P31547	metI
P04128	fimA	P08191	fimH
P08190	fimG	P08191	fimH
P02929	tonB	P16869	fhuE
P0ABU7	exbB	P16869	fhuE
P0ABV2	exbD	P16869	fhuE
P07821	fhuC	P07822	fhuD
P07821	fhuC	P06972	fhuB
P07822	fhuD	P06972	fhuB
P15031	fecE	P15030	fecC
P15028	fecB	P15030	fecC
P15029	fecD	P15030	fecC
P0C8J8	gatZ	P0C8J6	gatY
P04128	fimA	P08189	fimF
P08190	fimG	P08189	fimF
P08191	fimH	P08189	fimF
P0ADX5	yhfG	P20605	fic
P0AEP9	glcD	P52073	glcE
P52074	glcF	P52073	glcE
P0AEL6	fepB	P23877	fepG
P23876	fepD	P23877	fepG
P23878	fepC	P23877	fepG
P0AES6	gyrB	P0AES4	gyrA
P02930	tolC	P75830	macA
P75831	macB	P75830	macA
P02916	malF	P68187	malK
P0AEX9	malE	P68187	malK
P68183	malG	P68187	malK
P69212	mdtJ	P69210	mdtI
P0AE72	mazE	P0AE70	mazF
P02930	tolC	P76398	mdtB
P76399	mdtC	P76398	mdtB
P76397	mdtA	P76398	mdtB
P02930	tolC	P37636	mdtE
P02930	tolC	P37637	mdtF
P37636	mdtE	P37637	mdtF
P77463	ddpC	P76128	ddpA
P77622	ddpF	P76128	ddpA
P77308	ddpB	P76128	ddpA
P77463	ddpC	P77268	ddpD
P77622	ddpF	P77268	ddpD
P77308	ddpB	P77268	ddpD
P76128	ddpA	P77268	ddpD
P29018	cydD	P23886	cydC
P37349	dhaM	P76015	dhaK
P37349	dhaM	P76014	dhaL
P76015	dhaK	P76014	dhaL
P0ABS5	dnaG	P0ACB0	dnaB
P0A8J2	dnaT	P0ACB0	dnaB
P07013	priB	P0ACB0	dnaB
P23862	priC	P0ACB0	dnaB
P17888	priA	P0ACB0	dnaB
P06722	mutH	P23909	mutS
P23367	mutL	P23909	mutS
