# Supplementary material for: Defining hierarchical protein interaction networks from spectral analysis of bacterial proteomes
Source: eLife. 2022 Aug 17;11:e74104. doi: 10.7554/eLife.74104 (PMC9427106; doi:10.7554/eLife.74104)
Supplement: Figure 8—source data 1. [file elife-74104-fig8-data1.xlsx]

## Sheet: Overview
Figure 4 source data 1: Data and statistical support for RF model validation studies, related to Figure 4, Figure 4--Figure Supplement 3
Tab	Description
Fig_2C Data	F-scores across 50 replicates for classifying E. coli K12 protein pairs in the validation dataset using RF models trained on various features
Fig_2C Statistics	P-values for pairwise comparison of the performance of the RF models trained on the different features in classifying pairs in the validation dataset
Fig_S7 Data	F-scores across 50 replicates for classifying out-of-bag E. coli K12 protein pairs in the training dataset using RF models trained on various features
Fig_S7 Statistics	P-values for pairwise comparison of the performance of the RF models trained on the different features for classifying out-of-bag examples in the training dataset
Fig_S8 Data	F-scores across 50 replicates for classifying E. coli K12 protein pairs in four comprehensive benchmarks using RF models trained on various features
Fig_S8 Statistics	P-values for pairwise comparison of the performance of the RF models trained on the different features for classifying PPIs in four comprehensive benchmarks
Fig_2D Data	Precision and recall for predicting proteome-wide direct PPIs in 12 diverse organisms using various methods
Fig_2D Statistics	P-values for pairwise comparison of the precision and recall for predicting proteome-wide direct PPIs in 12 diverse organisms using various methods
Fig_2E Data and Statistics	Comparison of PPIs predicted for M. tuberculosis using RF models trained on MIWSCs versus the approach of Cong et al.

## Sheet: Fig_4A Data
This spreadsheet contains the F-scores for classifying pairs of E. coli K12 proteins as not-interacting, indirect PPI, and direct PPI using RF models trained on different features of protein covariation.
Each element in the tables represents the F-score for predicting the indicated interaction type for pairs in the validation dataset for a single replicate of randomly partitioning the gold-standard set into training and validation sets.
Colormap ranges from 0 (white) to 1 (green)
Class = "Not-interacting"
Feature	Rep 1	Rep 2	Rep 3	Rep 4	Rep 5	Rep 6	Rep 7	Rep 8	Rep 9	Rep 10	Rep 11	Rep 12	Rep 13	Rep 14	Rep 15	Rep 16	Rep 17	Rep 18	Rep 19	Rep 20	Rep 21	Rep 22	Rep 23	Rep 24	Rep 25	Rep 26	Rep 27	Rep 28	Rep 29	Rep 30	Rep 31	Rep 32	Rep 33	Rep 34	Rep 35	Rep 36	Rep 37	Rep 38	Rep 39	Rep 40	Rep 41	Rep 42	Rep 43	Rep 44	Rep 45	Rep 46	Rep 47	Rep 48	Rep 49
MIWSC	0.996384	0.996081	0.9964	0.996402	0.996241	0.996259	0.996348	0.9961	0.996365	0.995956	0.996098	0.996436	0.996242	0.996135	0.996096	0.995885	0.996259	0.995831	0.996044	0.996169	0.995795	0.996258	0.996187	0.996418	0.996117	0.996008	0.99617	0.996276	0.996436	0.996026	0.995903	0.995832	0.996152	0.996115	0.996117	0.996046	0.996345	0.995637	0.99633	0.995636	0.996188	0.996081	0.996135	0.99592	0.996239	0.996295	0.996063	0.995689	0.996365
Epistasis	0.990886	0.990886	0.990904	0.990958	0.99094	0.990958	0.990958	0.990904	0.990904	0.990904	0.990922	0.99085	0.990922	0.99094	0.990904	0.990922	0.990922	0.990975	0.990958	0.990904	0.99085	0.990958	0.990958	0.990922	0.990922	0.990958	0.990958	0.99094	0.990886	0.990868	0.990975	0.990958	0.990958	0.99094	0.99094	0.990957	0.99094	0.990921	0.990957	0.99094	0.990922	0.990886	0.99094	0.990958	0.990868	0.990939	0.990904	0.990904	0.990904
Y2H	0.990958	0.990958	0.990958	0.991062	0.991027	0.990958	0.990958	0.990958	0.990958	0.990956	0.990958	0.990958	0.99099	0.991115	0.991043	0.990958	0.991008	0.990958	0.990958	0.990958	0.990991	0.990958	0.990958	0.991008	0.990954	0.990958	0.990958	0.991062	0.991027	0.991079	0.990921	0.991132	0.991026	0.991079	0.990958	0.990958	0.990958	0.99115	0.990958	0.991025	0.990958	0.990958	0.991009	0.991026	0.991008	0.991026	0.991062	0.990958	0.990958
APMS1	0.990814	0.990814	0.990849	0.990849	0.990796	0.990778	0.990813	0.990886	0.990617	0.990706	0.990831	0.990797	0.990761	0.990814	0.990849	0.990778	0.990689	0.99076	0.990725	0.990885	0.990814	0.990833	0.990939	0.990778	0.990796	0.990707	0.990778	0.990761	0.990796	0.990778	0.990689	0.990778	0.990707	0.990761	0.99076	0.990904	0.990742	0.990707	0.990868	0.99085	0.990636	0.990706	0.990832	0.99067	0.990778	0.990868	0.990796	0.990849	0.990761
APMS2	0.991045	0.991063	0.990975	0.99101	0.990975	0.991027	0.991027	0.991045	0.990975	0.991028	0.99108	0.99101	0.991063	0.991009	0.991028	0.991028	0.990993	0.991028	0.99101	0.990992	0.990993	0.991063	0.990992	0.990993	0.991063	0.99101	0.990993	0.99101	0.99101	0.991045	0.991028	0.991045	0.991028	0.99101	0.99101	0.991063	0.99101	0.991045	0.991028	0.99101	0.991027	0.991045	0.990974	0.991028	0.991063	0.991045	0.99101	0.991045	0.991028
GC	0.992592	0.992274	0.9927	0.992325	0.992665	0.99238	0.992571	0.992645	0.992609	0.992363	0.992286	0.992754	0.99261	0.992414	0.992519	0.992538	0.99291	0.992362	0.992521	0.992037	0.992341	0.992645	0.992163	0.992342	0.992574	0.992571	0.992432	0.99229	0.992573	0.992037	0.992345	0.992434	0.992732	0.992784	0.992034	0.992469	0.992521	0.991966	0.992571	0.992469	0.992717	0.992222	0.992183	0.991989	0.992149	0.992856	0.992056	0.992411	0.992769
GN	0.991287	0.991339	0.991286	0.991234	0.991233	0.99141	0.991288	0.99113	0.991253	0.991304	0.991429	0.991269	0.991217	0.9912	0.991339	0.991358	0.991394	0.991163	0.991306	0.991428	0.991448	0.991429	0.991234	0.991465	0.991269	0.991587	0.991393	0.991304	0.991324	0.991324	0.991428	0.991253	0.991357	0.991374	0.991198	0.991376	0.991304	0.991093	0.991374	0.991394	0.991517	0.991321	0.991269	0.991179	0.991358	0.99134	0.99125	0.991375	0.991305
GF	0.992642	0.993288	0.993292	0.993244	0.993212	0.993371	0.993497	0.993465	0.993628	0.993155	0.993482	0.992893	0.993311	0.993435	0.993763	0.993696	0.993661	0.993276	0.993077	0.993357	0.993056	0.993659	0.99336	0.993531	0.993497	0.993306	0.993592	0.993682	0.993141	0.993285	0.993646	0.993536	0.993159	0.993659	0.993181	0.993162	0.993622	0.993136	0.993325	0.993487	0.994034	0.993289	0.993325	0.993147	0.993514	0.993469	0.993197	0.993179	0.993842
b-MI	0.98664	0.986054	0.985858	0.985797	0.986418	0.986038	0.985548	0.98644	0.986383	0.987001	0.985911	0.986059	0.98563	0.986313	0.986328	0.98648	0.986262	0.986404	0.986034	0.98579	0.986012	0.986235	0.986602	0.985481	0.985716	0.986782	0.986787	0.986027	0.986468	0.985909	0.985491	0.986575	0.985978	0.986332	0.986242	0.985954	0.986343	0.986148	0.986727	0.985755	0.986418	0.986068	0.986417	0.985678	0.98564	0.986184	0.986239	0.986599	0.98571
Cov	0.986133	0.986893	0.986131	0.986059	0.985895	0.986148	0.986222	0.986518	0.986967	0.986133	0.986354	0.986782	0.98688	0.98509	0.985745	0.985705	0.98659	0.986482	0.987253	0.98686	0.987237	0.985388	0.986189	0.986283	0.986626	0.986207	0.985628	0.985608	0.985961	0.986126	0.98664	0.986679	0.986649	0.985815	0.986186	0.985885	0.986707	0.985828	0.986167	0.985959	0.986512	0.985884	0.986456	0.986075	0.986653	0.986327	0.9861	0.986906	0.985888
PCA 1-5	0.986629	0.987181	0.987403	0.985978	0.987309	0.98708	0.987387	0.986556	0.986189	0.987184	0.986268	0.986953	0.987573	0.98672	0.986769	0.986901	0.987452	0.987482	0.987415	0.986759	0.987406	0.987532	0.987002	0.986987	0.988126	0.987205	0.987032	0.987765	0.986663	0.986642	0.987539	0.986648	0.987073	0.988329	0.987187	0.986232	0.987332	0.986233	0.986969	0.986675	0.987245	0.98638	0.986879	0.986935	0.986372	0.987334	0.98638	0.98711	0.987201
PCA 1-10	0.988868	0.988889	0.988716	0.989192	0.988973	0.989284	0.98926	0.987907	0.988902	0.988925	0.988541	0.988993	0.988041	0.988184	0.988584	0.988333	0.988868	0.988909	0.988232	0.988309	0.988801	0.988398	0.988735	0.988363	0.98802	0.98845	0.989175	0.988725	0.988591	0.988287	0.988419	0.988171	0.988574	0.989337	0.989379	0.988369	0.989386	0.988377	0.988541	0.98887	0.988958	0.988818	0.988023	0.988319	0.98865	0.988149	0.988711	0.988326	0.988165
PCA 1-20	0.9915	0.991153	0.990703	0.990652	0.99094	0.99035	0.990834	0.990872	0.989895	0.990653	0.99078	0.990778	0.990797	0.990296	0.990682	0.990151	0.990221	0.990765	0.991133	0.990439	0.991067	0.990994	0.991228	0.990779	0.990638	0.990544	0.990331	0.990278	0.99014	0.991048	0.99109	0.990734	0.990111	0.991479	0.990527	0.990691	0.991459	0.990351	0.990653	0.989844	0.991084	0.990876	0.991015	0.991319	0.990593	0.990997	0.991519	0.990616	0.99119
PCA 1-50	0.992912	0.992314	0.992494	0.992981	0.992926	0.992389	0.992729	0.992479	0.992438	0.992461	0.992656	0.992078	0.992262	0.992463	0.99276	0.992227	0.992406	0.99291	0.992818	0.992656	0.993215	0.992765	0.992242	0.991972	0.992069	0.992476	0.992207	0.992624	0.992872	0.992819	0.993057	0.99205	0.992083	0.992188	0.992301	0.992659	0.992458	0.992013	0.991918	0.991439	0.992799	0.992859	0.992371	0.992263	0.99235	0.992191	0.992548	0.992678	0.992384
PCA 1-100	0.992947	0.9928	0.993194	0.992926	0.992533	0.992874	0.99251	0.992748	0.992853	0.992457	0.992819	0.99233	0.992836	0.99264	0.992706	0.992728	0.992674	0.992639	0.99384	0.992243	0.992352	0.992598	0.993158	0.992529	0.992192	0.992081	0.992745	0.993143	0.992942	0.993123	0.99291	0.992195	0.993233	0.992965	0.993123	0.992623	0.992726	0.992482	0.992707	0.992567	0.99246	0.992803	0.992584	0.993123	0.992994	0.99298	0.993052	0.992656	0.992866
PCA 1-500	0.991019	0.990531	0.990498	0.99085	0.990783	0.990383	0.991234	0.990532	0.991012	0.990298	0.990655	0.990763	0.990431	0.99061	0.99035	0.99037	0.990713	0.990627	0.991107	0.990275	0.990552	0.991209	0.990508	0.990187	0.99084	0.990513	0.990392	0.990387	0.990775	0.98995	0.991071	0.990337	0.990619	0.990805	0.990693	0.990806	0.990254	0.990407	0.990858	0.990674	0.990855	0.990967	0.990262	0.990857	0.99096	0.990623	0.990518	0.990813	0.990799
PCA 1-1000	0.989107	0.988497	0.989229	0.989279	0.989431	0.989176	0.989245	0.988075	0.98872	0.988849	0.989117	0.988542	0.989553	0.988207	0.988597	0.988781	0.988974	0.988561	0.988939	0.988728	0.988693	0.988918	0.988484	0.988902	0.988916	0.98858	0.988443	0.989127	0.988629	0.989442	0.988784	0.988961	0.988703	0.989107	0.989011	0.989071	0.989135	0.98896	0.988549	0.98916	0.98907	0.988977	0.989084	0.98901	0.989147	0.989387	0.98941	0.989408	0.989304
PCA 1-5000	0.985839	0.98611	0.986468	0.987032	0.986203	0.986654	0.987034	0.986817	0.986779	0.986257	0.986855	0.986304	0.986494	0.986986	0.98667	0.986013	0.986635	0.98695	0.986816	0.98646	0.986528	0.986849	0.986742	0.985968	0.986076	0.986349	0.986295	0.9866	0.986989	0.985763	0.987035	0.986786	0.986578	0.98644	0.987018	0.98552	0.986597	0.986186	0.985819	0.986189	0.986818	0.986023	0.986382	0.986799	0.986649	0.98692	0.986403	0.987212	0.986633
PCA 1-7047	0.985901	0.984849	0.986658	0.985188	0.985044	0.986048	0.986011	0.986265	0.986101	0.985178	0.985048	0.986132	0.985853	0.985561	0.986006	0.986124	0.985632	0.985758	0.985971	0.985884	0.985686	0.986095	0.985281	0.98706	0.986336	0.985701	0.985942	0.985683	0.986329	0.986298	0.985214	0.985324	0.986167	0.985904	0.985883	0.986049	0.985571	0.985359	0.987039	0.985218	0.986043	0.986415	0.986858	0.986479	0.985803	0.986439	0.986677	0.986276	0.986097
Class = "Indirect PPI"
Feature	Rep 1	Rep 2	Rep 3	Rep 4	Rep 5	Rep 6	Rep 7	Rep 8	Rep 9	Rep 10	Rep 11	Rep 12	Rep 13	Rep 14	Rep 15	Rep 16	Rep 17	Rep 18	Rep 19	Rep 20	Rep 21	Rep 22	Rep 23	Rep 24	Rep 25	Rep 26	Rep 27	Rep 28	Rep 29	Rep 30	Rep 31	Rep 32	Rep 33	Rep 34	Rep 35	Rep 36	Rep 37	Rep 38	Rep 39	Rep 40	Rep 41	Rep 42	Rep 43	Rep 44	Rep 45	Rep 46	Rep 47	Rep 48	Rep 49
MIWSC	0.766667	0.749117	0.766744	0.762813	0.758045	0.763938	0.770686	0.736077	0.768335	0.734357	0.752076	0.766355	0.754217	0.748201	0.767123	0.738095	0.756501	0.727705	0.748538	0.755294	0.727915	0.759582	0.764706	0.769409	0.75179	0.750288	0.755981	0.764706	0.767795	0.751163	0.733333	0.735084	0.756563	0.754982	0.74313	0.743468	0.772009	0.714459	0.761457	0.725327	0.761905	0.743682	0.747305	0.745882	0.762125	0.767386	0.741359	0.726841	0.769767
Epistasis	NaN	0.00408998	NaN	NaN	NaN	NaN	NaN	NaN	NaN	0.00409836	NaN	NaN	NaN	NaN	NaN	NaN	NaN	0.00413223	NaN	NaN	NaN	NaN	NaN	NaN	NaN	NaN	NaN	NaN	NaN	NaN	0.00413223	NaN	NaN	NaN	NaN	0.00412371	NaN	0.00410678	0.00412371	NaN	NaN	NaN	NaN	NaN	NaN	0.00411523	NaN	0.00409836	NaN
Y2H	NaN	NaN	NaN	NaN	NaN	NaN	NaN	NaN	NaN	NaN	NaN	NaN	NaN	NaN	NaN	NaN	NaN	NaN	NaN	NaN	NaN	NaN	NaN	NaN	NaN	NaN	NaN	NaN	NaN	NaN	NaN	0.012024	NaN	NaN	NaN	NaN	NaN	NaN	NaN	NaN	NaN	NaN	NaN	NaN	NaN	NaN	NaN	NaN	NaN
APMS1	0.00411523	NaN	0.00409836	0.00813008	NaN	0.00408998	0.0040568	0.00413223	NaN	NaN	0.00809717	NaN	NaN	NaN	0.00821355	0.00814664	NaN	0.00406504	NaN	0.00821355	0.00410678	NaN	0.00413223	0.0121212	0.00409836	NaN	0.00408163	NaN	0.00409836	0.00814664	NaN	0.00408998	0.0040404	NaN	0.00409836	NaN	0.00811359	NaN	0.00413223	NaN	0.00408163	0.00406504	0.00409836	0.00407332	0.00411523	0.00411523	0.00409836	0.00814664	NaN
APMS2	0.00413223	NaN	NaN	0.00413223	NaN	0.00413223	NaN	NaN	NaN	NaN	0.00413223	0.00412371	NaN	NaN	0.00413223	0.00413223	NaN	0.00413223	NaN	NaN	NaN	0.00413223	NaN	0.00413223	0.00413223	NaN	NaN	0.00413223	NaN	0.00413223	NaN	NaN	0.00413223	NaN	NaN	0.00413223	NaN	0.00413223	NaN	0.00413223	NaN	0.00413223	NaN	0.00413223	0.00413223	0.00413223	NaN	0.00413223	0.00413223
GC	0.349486	0.324405	0.367164	0.351391	0.35061	0.339791	0.381487	0.37518	0.377358	0.329305	0.358757	0.358744	0.368732	0.361272	0.356725	0.366279	0.384728	0.319277	0.351906	0.343662	0.346821	0.382609	0.356941	0.349854	0.345133	0.390999	0.348083	0.328889	0.367816	0.343179	0.351032	0.338831	0.387191	0.396576	0.360164	0.351551	0.348974	0.34965	0.381895	0.340299	0.365782	0.302572	0.323923	0.312409	0.32	0.393632	0.34512	0.378682	0.385965
GN	0.0395257	0.0583658	0.0429688	0.0545809	0.0727969	0.0662768	0.0359281	0.031746	0.054902	0.0545809	0.0588235	0.0429688	0.0466926	0.0394477	0.0510806	0.0583658	0.0590551	0.042885	0.0473373	0.0620155	0.0511811	0.0508806	0.0617761	0.0513834	0.023622	0.0591716	0.0699029	0.0591716	0.0433925	0.0280561	0.0773694	0.0473373	0.0500963	0.0690979	0.0540541	0.054902	0.0582524	0.0348837	0.0610687	0.0623782	0.0775194	0.0467836	0.0470588	0.0610687	0.0585938	0.0507812	0.0465116	0.0394477	0.0582524
GF	0.501767	0.513076	0.476943	0.536416	0.525687	0.539007	0.548272	0.51677	0.527112	0.534262	0.541463	0.493947	0.489474	0.498701	0.561321	0.556627	0.542331	0.487417	0.479592	0.53125	0.497537	0.547215	0.515	0.549065	0.534296	0.508816	0.527112	0.517857	0.517282	0.522156	0.542033	0.539024	0.521845	0.544785	0.509317	0.508475	0.545455	0.541336	0.496183	0.507042	0.573871	0.508217	0.501911	0.496222	0.540094	0.505208	0.50365	0.512758	0.538071
b-MI	0.268839	0.262802	0.265896	0.277209	0.275049	0.27001	0.266038	0.264794	0.26973	0.278008	0.251707	0.26784	0.24902	0.266533	0.269307	0.248205	0.257742	0.252803	0.280428	0.259259	0.24572	0.282398	0.26762	0.254789	0.259188	0.276986	0.268191	0.247734	0.300099	0.26975	0.270677	0.248694	0.278095	0.249489	0.261569	0.255446	0.278431	0.27593	0.272635	0.246334	0.272908	0.237563	0.279441	0.263969	0.27177	0.27175	0.261905	0.28028	0.274102
Cov	0.256716	0.265836	0.273538	0.264039	0.267701	0.277886	0.267592	0.255885	0.271605	0.257228	0.256098	0.279022	0.264831	0.23166	0.280769	0.244	0.252588	0.252588	0.285417	0.26847	0.283912	0.253548	0.263581	0.247465	0.259259	0.268537	0.246792	0.247322	0.287345	0.278578	0.272635	0.268873	0.293542	0.233029	0.269307	0.248509	0.29065	0.251969	0.266928	0.247236	0.26626	0.251236	0.277502	0.268102	0.283151	0.270854	0.245226	0.293225	0.28408
PCA 1-5	0.305284	0.339512	0.3286	0.292453	0.339216	0.31746	0.327604	0.311891	0.311491	0.327451	0.303382	0.315068	0.308824	0.311199	0.310511	0.309524	0.341847	0.3125	0.343023	0.305556	0.322778	0.327935	0.342466	0.318271	0.343096	0.330709	0.302846	0.337079	0.310378	0.324688	0.306736	0.304649	0.331075	0.331539	0.323471	0.295082	0.327273	0.299413	0.316098	0.27907	0.313965	0.291089	0.320078	0.319921	0.319696	0.321608	0.283168	0.34236	0.335953
PCA 1-10	0.407921	0.398349	0.419847	0.412538	0.419258	0.409091	0.432866	0.400378	0.408325	0.404858	0.396484	0.416582	0.378744	0.381694	0.430309	0.37931	0.405216	0.395087	0.401515	0.391813	0.395918	0.396857	0.421663	0.392542	0.383721	0.401552	0.406989	0.40199	0.411374	0.400381	0.38607	0.366534	0.411251	0.406186	0.40509	0.375879	0.421578	0.393822	0.399221	0.393909	0.400806	0.400814	0.376953	0.414634	0.405854	0.379548	0.384852	0.398453	0.378431
PCA 1-20	0.529351	0.531746	0.512573	0.506379	0.521912	0.492522	0.505976	0.503006	0.488679	0.507905	0.508	0.511397	0.508543	0.489194	0.524217	0.48723	0.494581	0.503568	0.539062	0.50499	0.518668	0.518445	0.532	0.513433	0.496982	0.506823	0.489152	0.484127	0.517958	0.522344	0.512927	0.485923	0.492248	0.529828	0.508806	0.501002	0.541793	0.48503	0.501487	0.473077	0.524096	0.497908	0.512716	0.528875	0.515038	0.501535	0.518672	0.513222	0.527054
PCA 1-50	0.596234	0.598814	0.59725	0.604888	0.612903	0.571429	0.597586	0.592292	0.605058	0.582822	0.592223	0.588571	0.577954	0.583587	0.617476	0.583333	0.592145	0.598131	0.600601	0.600995	0.617769	0.607823	0.599222	0.581213	0.558943	0.593103	0.583581	0.59465	0.621814	0.600201	0.599789	0.56338	0.570858	0.588351	0.587996	0.5941	0.602956	0.574277	0.578337	0.550696	0.603774	0.596455	0.591182	0.588469	0.59332	0.585657	0.593407	0.597536	0.60213
PCA 1-100	0.590909	0.592145	0.602216	0.607214	0.582329	0.591002	0.587549	0.596173	0.592518	0.59332	0.582741	0.580833	0.59432	0.575788	0.608108	0.594	0.59127	0.588589	0.637591	0.56305	0.574553	0.599424	0.62753	0.595331	0.573413	0.580392	0.574317	0.595436	0.602193	0.592213	0.582645	0.567901	0.598739	0.597107	0.605076	0.572308	0.604331	0.574642	0.599609	0.586	0.577465	0.577869	0.582428	0.614286	0.613569	0.596527	0.594484	0.590229	0.617021
PCA 1-500	0.478579	0.467532	0.453524	0.489109	0.480573	0.469548	0.481598	0.460302	0.485398	0.45674	0.472362	0.478873	0.447451	0.45283	0.465257	0.456456	0.455959	0.452752	0.48866	0.472062	0.45935	0.495468	0.477963	0.461688	0.478261	0.467532	0.456726	0.468938	0.500483	0.465072	0.494888	0.443756	0.486486	0.46604	0.467742	0.46888	0.485196	0.468687	0.461538	0.476	0.474716	0.465263	0.454183	0.476289	0.480885	0.45	0.450939	0.498545	0.472727
PCA 1-1000	0.380853	0.358818	0.393476	0.417582	0.395421	0.396728	0.412955	0.360815	0.389535	0.378109	0.39799	0.392157	0.408952	0.359329	0.379447	0.381048	0.388778	0.375615	0.392	0.372608	0.373089	0.399608	0.401544	0.39	0.410156	0.382266	0.346311	0.380853	0.391137	0.41456	0.371197	0.383367	0.391304	0.373306	0.39881	0.365702	0.404762	0.383065	0.354145	0.395918	0.383901	0.398406	0.397192	0.39802	0.410455	0.406061	0.395036	0.40081	0.393846
PCA 1-5000	0.250723	0.256311	0.27957	0.271357	0.261554	0.25974	0.268443	0.262997	0.26506	0.256663	0.253347	0.277457	0.248497	0.25523	0.265204	0.228745	0.261044	0.246862	0.262729	0.251012	0.255234	0.286845	0.276276	0.244186	0.244858	0.259406	0.247734	0.262525	0.301288	0.261611	0.264615	0.251806	0.273538	0.240647	0.267765	0.235294	0.271556	0.255403	0.245446	0.254726	0.268994	0.24558	0.268245	0.273367	0.272282	0.283151	0.252	0.290946	0.270484
PCA 1-7047	0.230461	0.222638	0.264074	0.233302	0.237162	0.234107	0.23023	0.238866	0.238143	0.226744	0.226451	0.245059	0.221998	0.218504	0.244533	0.226531	0.218254	0.228228	0.242304	0.237389	0.220238	0.252465	0.232246	0.252898	0.244939	0.233562	0.228106	0.237023	0.262586	0.243706	0.22758	0.217221	0.255906	0.221774	0.237762	0.222672	0.248544	0.229952	0.250526	0.218324	0.242304	0.222222	0.254922	0.243655	0.251938	0.254509	0.245322	0.260612	0.248766
Class = "Direct PPI"
Feature	Rep 1	Rep 2	Rep 3	Rep 4	Rep 5	Rep 6	Rep 7	Rep 8	Rep 9	Rep 10	Rep 11	Rep 12	Rep 13	Rep 14	Rep 15	Rep 16	Rep 17	Rep 18	Rep 19	Rep 20	Rep 21	Rep 22	Rep 23	Rep 24	Rep 25	Rep 26	Rep 27	Rep 28	Rep 29	Rep 30	Rep 31	Rep 32	Rep 33	Rep 34	Rep 35	Rep 36	Rep 37	Rep 38	Rep 39	Rep 40	Rep 41	Rep 42	Rep 43	Rep 44	Rep 45	Rep 46	Rep 47	Rep 48	Rep 49
MIWSC	0.612245	0.55814	0.695652	0.604651	0.695652	0.536585	0.595745	0.55814	0.755556	0.545455	0.538462	0.68	0.634146	0.604651	0.510638	0.604651	0.708333	0.638298	0.755556	0.638298	0.653061	0.711111	0.541667	0.545455	0.52381	0.604651	0.680851	0.533333	0.693878	0.595745	0.55	0.5	0.62963	0.612245	0.533333	0.45	0.734694	0.571429	0.604651	0.521739	0.625	0.530612	0.636364	0.439024	0.595745	0.625	0.68	0.52381	0.590909
Epistasis	NaN	NaN	NaN	NaN	NaN	NaN	NaN	NaN	NaN	NaN	NaN	NaN	NaN	NaN	NaN	NaN	NaN	NaN	NaN	NaN	NaN	NaN	NaN	NaN	NaN	NaN	NaN	NaN	NaN	NaN	NaN	NaN	NaN	NaN	NaN	NaN	NaN	NaN	NaN	NaN	NaN	NaN	NaN	NaN	NaN	NaN	NaN	NaN	NaN
Y2H	NaN	NaN	NaN	0.25	0.263158	NaN	NaN	NaN	NaN	0.15	NaN	NaN	0.272727	0.243902	0.285714	NaN	0.186047	NaN	NaN	NaN	NaN	NaN	NaN	0.266667	0.25	NaN	NaN	0.263158	0.166667	0.325581	0.166667	NaN	0.2	0.243902	NaN	NaN	NaN	0.372093	NaN	0.291667	NaN	NaN	0.146341	0.25	0.266667	0.25	0.263158	NaN	NaN
APMS1	NaN	0.0526316	0.108108	0.0571429	0.0571429	NaN	0.0588235	NaN	0.0851064	0.0512821	NaN	NaN	NaN	0.0645161	0.1	0.0526316	NaN	0.111111	NaN	NaN	0.0526316	NaN	NaN	0.0588235	NaN	NaN	0.0571429	0.0526316	0.105263	NaN	0.047619	0.0526316	NaN	NaN	0.0952381	NaN	0.0555556	NaN	0.0555556	NaN	NaN	0.0512821	0.0588235	0.0909091	0.0512821	NaN	NaN	NaN	NaN
APMS2	0.25	0.352941	0.129032	0.133333	0.0689655	0.242424	0.294118	0.30303	0.0689655	0.25	0.352941	0.193548	0.352941	0.294118	0.193548	0.193548	0.133333	0.193548	0.193548	0.242424	0.133333	0.30303	0.193548	0.0689655	0.30303	0.242424	0.133333	0.133333	0.193548	0.294118	0.25	0.30303	0.193548	0.193548	0.193548	0.30303	0.193548	0.333333	0.25	0.133333	0.294118	0.294118	0.1875	0.193548	0.30303	0.25	0.193548	0.25	0.193548
GC	0.416667	0.468085	0.638298	0.509804	0.622951	0.576923	0.444444	0.487805	0.553191	0.642857	0.5	0.571429	0.615385	0.577778	0.47619	0.541667	0.5625	0.5	0.470588	0.48	0.509091	0.5	0.604651	0.45283	0.448276	0.510638	0.5	0.545455	0.541667	0.566038	0.487805	0.603774	0.580645	0.542373	0.54902	0.577778	0.470588	0.530612	0.54902	0.458333	0.541667	0.408163	0.610169	0.421053	0.553191	0.590164	0.625	0.47619	0.641509
GN	0.347826	0.255319	0.217391	0.157895	0.0512821	0.217391	0.4	0.114286	0.222222	0.26087	0.285714	0.139535	0.105263	0.222222	0.307692	0.238095	0.2	0.190476	0.333333	0.272727	0.25641	0.205128	0.153846	0.285714	0.255319	0.346154	0.205128	0.2	0.307692	0.266667	0.341463	0.324324	0.139535	0.227273	0.307692	0.341463	0.173913	0.171429	0.292683	0.114286	0.307692	0.326531	0.266667	0.285714	0.272727	0.27907	0.208333	0.259259	0.210526
GF	0.35	0.333333	0.433333	0.413793	0.392857	0.533333	0.392857	0.37037	0.340426	0.52459	0.444444	0.45614	0.4	0.311111	0.428571	0.263158	0.186047	0.352941	0.382979	0.205128	0.409091	0.36	0.255319	0.4	0.433333	0.433333	0.408163	0.367347	0.357143	0.238095	0.380952	0.408163	0.419355	0.491803	0.48	0.333333	0.384615	0.32	0.45614	0.297872	0.444444	0.392857	0.444444	0.44898	0.269231	0.45614	0.375	0.375	0.363636
b-MI	0.346154	0.327273	0.226415	0.311111	0.333333	0.375	0.230769	0.153846	0.262295	0.269231	0.338462	0.285714	0.269231	0.275862	0.40678	0.407407	0.347826	0.294118	0.27027	0.163265	0.185185	0.333333	0.307692	0.153846	0.339623	0.148148	0.321429	0.215385	0.264706	0.354839	0.196721	0.352941	0.366667	0.373333	0.266667	0.296296	0.322581	0.156863	0.322581	0.25	0.366667	0.204082	0.272727	0.254545	0.178571	0.36	0.344828	0.315789	0.352941
Cov	0.315789	0.350877	0.229508	0.181818	0.230769	0.150943	0.296296	0.217391	0.3	0.245614	0.307692	0.321429	0.145455	0.192308	0.225352	0.241379	0.218182	0.280702	0.36	0.204082	0.2	0.153846	0.280702	0.25	0.222222	0.185185	0.276923	0.322581	0.214286	0.352941	0.204082	0.254545	0.326531	0.360656	0.181818	0.217391	0.235294	0.235294	0.326531	0.12766	0.31746	0.212766	0.285714	0.315789	0.307692	0.296296	0.4	0.222222	0.225806
PCA 1-5	0.137931	0.181818	0.26087	0.24	0.206897	0.188679	0.140351	0.1	0.169014	0.218182	0.163934	0.2	0.1875	0.0909091	0.210526	0.210526	0.241379	0.229508	0.269231	0.0754717	0.16129	0.192308	0.0895522	0.206897	0.20339	0.166667	0.178571	0.206897	0.181818	0.172414	0.195122	0.125	0.344828	0.315789	0.204082	0.135593	0.15873	0.117647	0.269231	0.12766	0.184615	0.15625	0.156863	0.153846	0.109091	0.192308	0.242424	0.117647	0.225806
PCA 1-10	0.163265	0.197183	0.218182	0.214286	0.142857	0.0967742	0.126984	0.0952381	0.178571	0.185185	0.175439	0.140845	0.166667	0.142857	0.153846	0.149254	0.129032	0.269231	0.192308	0.0740741	0.0727273	0.15873	0.193548	0.129032	0.193548	0.20339	0.208955	0.148148	0.255319	0.16	0.131148	0.148148	0.264706	0.215385	0.206897	0.142857	0.254545	0.2	0.241379	0.1	0.237288	0.105263	0.142857	0.145455	0.08	0.233333	0.222222	0.113208	0.1875
PCA 1-20	0.156863	0.229508	0.25	0.25	0.20339	0.222222	0.226415	0.133333	0.244898	0.237288	0.25	0.196721	0.117647	0.244898	0.259259	0.163934	0.194444	0.275862	0.233333	0.0952381	0.20339	0.210526	0.156863	0.140351	0.25	0.156863	0.290909	0.178571	0.202532	0.192308	0.208333	0.192308	0.289855	0.296296	0.222222	0.169492	0.262295	0.259259	0.266667	0.185185	0.245614	0.135593	0.241379	0.196078	0.0952381	0.222222	0.27451	0.153846	0.285714
PCA 1-50	0.169492	0.193548	0.230769	0.212766	0.185185	0.153846	0.122449	0.101695	0.181818	0.121212	0.185185	0.150943	0.206897	0.12766	0.181818	0.196078	0.193548	0.193548	0.212766	0.037037	0.12	0.166667	0.192308	0.115942	0.222222	0.0384615	0.163934	0.181818	0.205882	0.163265	0.217391	0.196078	0.262295	0.228571	0.142857	0.148148	0.245614	0.230769	0.193548	0.0952381	0.222222	0.170213	0.145455	0.156863	0.0714286	0.20339	0.25	0.115385	0.235294
PCA 1-100	0.196078	0.2	0.28	0.25	0.173913	0.150943	0.145455	0.0888889	0.246154	0.166667	0.20339	0.178571	0.169492	0.126984	0.24	0.254545	0.25	0.285714	0.166667	0.163265	0.185185	0.212766	0.101695	0.166667	0.244898	0.20339	0.197183	0.166667	0.192308	0.163934	0.175439	0.175439	0.305085	0.307692	0.269231	0.133333	0.235294	0.212766	0.296296	0.115385	0.233333	0.156863	0.173913	0.181818	0.0727273	0.225806	0.269231	0.142857	0.271186
PCA 1-500	0.366667	0.470588	0.327273	0.310345	0.354839	0.3	0.333333	0.255319	0.34375	0.327869	0.322581	0.350877	0.326531	0.384615	0.356164	0.346154	0.338462	0.26087	0.357143	0.291667	0.382979	0.393443	0.233333	0.304348	0.326531	0.230769	0.38806	0.357143	0.301887	0.327273	0.333333	0.333333	0.433333	0.37037	0.313725	0.243902	0.384615	0.218182	0.430769	0.375	0.369231	0.310345	0.352941	0.307692	0.346154	0.30137	0.459016	0.341463	0.421053
PCA 1-1000	0.393443	0.436364	0.37931	0.350877	0.408163	0.428571	0.483871	0.241379	0.571429	0.385965	0.484848	0.350877	0.380952	0.444444	0.483871	0.444444	0.298507	0.472727	0.459016	0.44	0.357143	0.363636	0.354839	0.4	0.333333	0.461538	0.461538	0.4	0.518519	0.444444	0.409091	0.461538	0.375	0.430769	0.530612	0.321429	0.428571	0.36	0.484848	0.212766	0.459016	0.311111	0.481481	0.392157	0.413793	0.387097	0.517241	0.44898	0.521739
PCA 1-5000	0.491228	0.415094	0.37931	0.325581	0.392157	0.4	0.423077	0.305085	0.518519	0.384615	0.459016	0.5	0.375	0.408163	0.472727	0.415094	0.4	0.44898	0.451613	0.423077	0.44898	0.444444	0.4	0.255319	0.392857	0.217391	0.354839	0.444444	0.338983	0.421053	0.326531	0.490566	0.433333	0.566667	0.307692	0.355556	0.491228	0.297872	0.413793	0.166667	0.34375	0.428571	0.407407	0.333333	0.615385	0.421053	0.509091	0.313725	0.44898
PCA 1-7047	0.47619	0.44	0.310345	0.40678	0.415094	0.407407	0.461538	0.340426	0.509091	0.327869	0.45614	0.461538	0.468085	0.541667	0.571429	0.355556	0.535714	0.333333	0.517241	0.340426	0.472727	0.428571	0.369231	0.26087	0.340426	0.436364	0.350877	0.384615	0.384615	0.56	0.307692	0.45614	0.444444	0.526316	0.338983	0.509804	0.349206	0.44	0.517241	0.408163	0.464286	0.431373	0.490566	0.5	0.387097	0.472727	0.470588	0.408163	0.470588
[truncated: 4 more columns]

## Sheet: Fig_4A Statistics
Each element contains the p-value for the statistical comparison of the median F-score for model trained on the feature listed in the row versus column using a one-sided Wilcoxon Rank Sum test
A significant p-value supports the hypothesis that the models trained on the feature in the row have a greater F-score for predicting the indicated interaction type compared to models trained on the feature listed in the column
Not-interacting
	Feature	MIWSC	Epistasis	Y2H	APMS1	APMS2	GC	GN	GF	b-MI	Cov	PCA 1-5	PCA 1-10	PCA 1-20	PCA 1-50	PCA 1-100	PCA 1-500	PCA 1-1000	PCA 1-5000	PCA 1-7047
	MIWSC	1	3.89525e-10	3.89525e-10	3.89525e-10	3.89525e-10	3.89525e-10	3.89525e-10	3.89525e-10	3.89525e-10	3.89525e-10	3.89525e-10	3.89525e-10	3.89437e-10	3.89437e-10	3.89525e-10	3.89525e-10	3.89525e-10	3.89525e-10	3.89525e-10
	Epistasis	1	1	0.920638	1	1	1	1	1	1	1	0.999952	0.0156719	1	1	1	1	1	1	1
	Y2H	1	0.0807978	1	1	1	1	1	1	1	1	0.990986	0.00079804	1	1	1	1	1	1	1
	APMS1	1	6.71114e-10	9.6474e-09	1	1	1	1	1	1	1	1.12201e-06	1.08173e-09	1	1	1	1	1	1	1
	APMS2	1	3.89525e-10	3.89525e-10	4.13947e-10	1	1	1	1	1	0.999899	3.89525e-10	3.89525e-10	1	1	1	1	1	1	1
	GC	1	3.89525e-10	3.89525e-10	3.89525e-10	3.89525e-10	1	1	1	0.0822535	3.89525e-10	3.89525e-10	3.89525e-10	0.997363	0.999829	0.768419	0.999961	1	1	1
	GN	1	3.89525e-10	3.89525e-10	3.89525e-10	3.89525e-10	3.89525e-10	1	0.999809	3.89525e-10	3.89525e-10	3.89525e-10	3.89525e-10	3.89525e-10	3.89525e-10	3.89525e-10	3.89525e-10	0.271542	3.89525e-10	1
	GF	1	3.89525e-10	3.89525e-10	3.89525e-10	3.89525e-10	3.89525e-10	0.000197986	1	3.89525e-10	3.89525e-10	3.89525e-10	3.89525e-10	3.89525e-10	3.89525e-10	3.89525e-10	3.89525e-10	2.12923e-05	3.89525e-10	1
	b-MI	1	3.89525e-10	3.89525e-10	3.89525e-10	3.89525e-10	0.919202	1	1	1	3.89525e-10	3.89525e-10	3.89525e-10	1	1	0.998742	1	1	1	1
	Cov	1	3.89525e-10	3.89525e-10	3.89525e-10	0.000104923	1	1	1	1	1	3.89525e-10	3.89525e-10	1	1	1	1	1	1	1
	PCA 1-5	1	5.00661e-05	0.00925139	0.999999	1	1	1	1	1	1	1	1.79703e-06	1	1	1	1	1	1	1
	PCA 1-10	1	0.984704	0.999228	1	1	1	1	1	1	1	0.999998	1	1	1	1	1	1	1	1
	PCA 1-20	1	3.89525e-10	3.89525e-10	3.89525e-10	3.89525e-10	0.00271674	1	1	1.40664e-07	3.89525e-10	3.89525e-10	3.89525e-10	1	1	3.89173e-10	1	1	1	1
	PCA 1-50	1	3.89525e-10	3.89525e-10	3.89525e-10	3.89525e-10	0.000177327	1	1	1.77367e-08	3.89525e-10	3.89525e-10	3.89525e-10	2.31048e-08	1	3.89437e-10	0.99939	1	1	1
	PCA 1-100	1	3.89525e-10	3.89525e-10	3.89525e-10	3.89525e-10	0.234534	1	1	0.00129842	3.89525e-10	3.89525e-10	3.89525e-10	1	1	1	1	1	1	1
	PCA 1-500	1	3.89525e-10	3.89525e-10	3.89525e-10	3.89525e-10	4.09899e-05	1	1	2.45954e-09	3.89525e-10	3.89525e-10	3.89525e-10	3.87069e-10	0.000630436	3.89437e-10	1	1	1	1
	PCA 1-1000	1	3.89525e-10	3.89525e-10	3.89525e-10	3.89525e-10	3.89525e-10	0.73165	0.99998	3.89525e-10	3.89525e-10	3.89525e-10	3.89525e-10	3.89437e-10	3.89085e-10	3.89525e-10	3.89437e-10	1	3.89525e-10	1
	PCA 1-5000	1	3.89525e-10	3.89525e-10	3.89525e-10	3.89525e-10	2.32075e-09	1	1	3.89525e-10	3.89525e-10	3.89525e-10	3.89525e-10	3.89525e-10	4.13947e-10	3.89525e-10	3.89525e-10	1	1	1
	PCA 1-7047	1	3.89525e-10	3.89525e-10	3.89525e-10	3.89525e-10	3.89525e-10	5.60271e-10	5.19017e-09	3.89525e-10	3.89525e-10	3.89525e-10	3.89525e-10	3.89525e-10	3.89525e-10	3.89525e-10	3.89525e-10	3.89525e-10	3.89525e-10	1
Indirect
	Feature	MIWSC	Epistasis	Y2H	APMS1	APMS2	GC	GN	GF	b-MI	Cov	PCA 1-5	PCA 1-10	PCA 1-20	PCA 1-50	PCA 1-100	PCA 1-500	PCA 1-1000	PCA 1-5000	PCA 1-7047
	MIWSC	1	3.89525e-10	3.89525e-10	3.89525e-10	3.89525e-10	3.89525e-10	3.89525e-10	3.89525e-10	3.89525e-10	3.89525e-10	3.89525e-10	3.89525e-10	3.89437e-10	3.89437e-10	3.89525e-10	3.89525e-10	3.89525e-10	3.89525e-10	3.89525e-10
	Epistasis	1	1	0.534616	1	1	1	1	1	1	1	0.00408457	3.89525e-10	3.89525e-10	3.89525e-10	3.89525e-10	3.89525e-10	1	3.89525e-10	1
	Y2H	1	0.469222	1	1	1	1	1	1	1	1	0.00999754	4.96518e-10	3.89525e-10	3.89437e-10	3.89525e-10	3.89525e-10	1	3.89525e-10	1
	APMS1	1	3.89525e-10	3.89525e-10	1	1	1	1	1	1	1	3.89525e-10	3.89525e-10	3.89525e-10	3.89525e-10	3.89525e-10	3.89525e-10	1	3.89525e-10	1
	APMS2	1	3.89525e-10	3.89525e-10	3.89525e-10	1	1	1	1	1	0.000136697	3.89525e-10	3.89525e-10	3.89525e-10	3.89525e-10	3.89525e-10	3.89525e-10	6.71114e-10	3.89525e-10	1
	GC	1	3.89525e-10	3.89525e-10	3.89525e-10	3.89525e-10	1	1	1	4.13947e-10	3.89525e-10	3.89525e-10	3.89525e-10	3.89525e-10	3.89525e-10	3.89525e-10	3.89525e-10	3.89525e-10	3.89525e-10	0.99909
	GN	1	3.89525e-10	3.89525e-10	3.89525e-10	3.89525e-10	3.89525e-10	1	0.45389	3.89525e-10	3.89525e-10	3.89525e-10	3.89525e-10	3.89525e-10	3.89525e-10	3.89525e-10	3.89525e-10	3.89525e-10	3.89525e-10	3.89525e-10
	GF	1	3.89525e-10	3.89525e-10	3.89525e-10	3.89525e-10	3.89525e-10	0.549933	1	3.89525e-10	3.89525e-10	3.89525e-10	3.89525e-10	3.89525e-10	3.89525e-10	3.89525e-10	3.89525e-10	3.89525e-10	3.89525e-10	3.89525e-10
	b-MI	1	3.89525e-10	3.89525e-10	3.89525e-10	3.89525e-10	1	1	1	1	3.89525e-10	3.89525e-10	3.89525e-10	3.89525e-10	3.89437e-10	3.89437e-10	3.89437e-10	3.89525e-10	3.89525e-10	1
	Cov	1	3.89525e-10	3.89525e-10	3.89525e-10	0.999868	1	1	1	1	1	3.89525e-10	3.89525e-10	3.89437e-10	3.89437e-10	3.89525e-10	3.89437e-10	2.74296e-08	3.89525e-10	1
	PCA 1-5	1	0.99603	0.990257	1	1	1	1	1	1	1	1	7.12607e-10	3.89525e-10	3.89525e-10	3.89525e-10	3.89525e-10	1	3.89525e-10	1
	PCA 1-10	1	1	1	1	1	1	1	1	1	1	1	1	3.89437e-10	3.89437e-10	3.89525e-10	3.89437e-10	1	3.89525e-10	1
	PCA 1-20	1	1	1	1	1	1	1	1	1	1	1	1	1	0.0410156	0.999842	0.999894	1	1	1
	PCA 1-50	1	1	1	1	1	1	1	1	1	1	1	1	0.966797	1	0.999997	0.999967	1	1	1
	PCA 1-100	1	1	1	1	1	1	1	1	1	1	1	1	0.000167897	3.3609e-06	1	0.0396619	1	1	1
	PCA 1-500	1	1	1	1	1	1	1	1	1	1	1	1	0.000117977	3.72426e-05	0.96152	1	1	1	1
	PCA 1-1000	1	3.89525e-10	3.89525e-10	1.73346e-09	1	1	1	1	1	1	3.89525e-10	3.89525e-10	3.89525e-10	3.89525e-10	3.89525e-10	3.89525e-10	1	3.89525e-10	1
	PCA 1-5000	1	1	1	1	1	1	1	1	1	1	1	1	3.89173e-10	3.88822e-10	3.89349e-10	3.89437e-10	1	1	1
	PCA 1-7047	1	3.89525e-10	3.89525e-10	3.89525e-10	3.89525e-10	0.000940657	1	1	4.13947e-10	3.89525e-10	3.89525e-10	3.89525e-10	3.89437e-10	3.89437e-10	3.89525e-10	3.89437e-10	3.89525e-10	3.89525e-10	1
Direct
	Feature	MIWSC	Epistasis	Y2H	APMS1	APMS2	GC	GN	GF	b-MI	Cov	PCA 1-5	PCA 1-10	PCA 1-20	PCA 1-50	PCA 1-100	PCA 1-500	PCA 1-1000	PCA 1-5000	PCA 1-7047
	MIWSC	1	3.89525e-10	3.89437e-10	3.89525e-10	3.89525e-10	3.89525e-10	3.89525e-10	3.89437e-10	3.89525e-10	3.89437e-10	4.3986e-10	8.03228e-10	3.86545e-10	3.88909e-10	3.89173e-10	3.89349e-10	3.05441e-06	3.89525e-10	4.3986e-10
	Epistasis	1	1	0.00878145	1.45349e-09	7.56596e-10	9.12288e-09	9.60356e-10	6.85396e-09	0.999995	1	1	1	3.88909e-10	2.46016e-08	3.89349e-10	9.35527e-05	1	0.00343668	1
	Y2H	1	0.991446	1	1.86625e-07	5.81416e-09	4.44159e-05	2.79846e-08	9.25657e-06	1	1	1	1	3.88646e-10	2.71995e-07	3.89349e-10	0.0215677	1	0.240502	1
	APMS1	1	1	1	1	0.0194236	0.999672	0.0514025	0.996462	1	1	1	1	3.88734e-10	0.000316227	4.1376e-10	0.992703	1	0.999931	1
	APMS2	1	1	1	0.981028	1	1	0.919202	0.999989	1	1	1	1	3.88383e-10	0.00305768	4.67143e-10	0.999653	1	0.999996	1
	GC	1	1	0.999957	0.000339459	2.22454e-07	1	3.92072e-06	0.0343525	1	1	1	1	3.87507e-10	1.67012e-05	4.13388e-10	0.804869	1	0.9868	1
	GN	1	1	1	0.949607	0.0822535	0.999996	1	0.999813	1	1	1	1	3.87857e-10	0.00133993	3.89349e-10	0.999377	1	0.999986	1
	GF	1	1	0.999991	0.00364141	1.10486e-05	0.966398	0.000194379	1	1	1	1	1	3.8812e-10	9.19348e-05	3.89261e-10	0.942199	1	0.998946	1
	b-MI	1	5.36547e-06	4.63147e-09	3.89525e-10	4.13947e-10	4.67352e-10	4.13947e-10	4.39662e-10	1	1	0.999999	1	3.88646e-10	1.14729e-09	3.89437e-10	1.5039e-08	1	4.69206e-08	0.998668
	Cov	1	1.21774e-09	3.89525e-10	3.89437e-10	3.89525e-10	3.89525e-10	3.89525e-10	3.89437e-10	9.8347e-08	1	0.182679	0.803536	3.88295e-10	4.66621e-10	3.89437e-10	5.94942e-10	1	4.67352e-10	0.0132685
	PCA 1-5	1	1.63476e-09	3.89525e-10	3.89525e-10	3.89525e-10	4.13853e-10	3.89525e-10	3.89525e-10	5.46322e-07	0.819944	1	0.962547	3.88295e-10	7.1136e-10	3.88997e-10	6.31841e-10	1	2.06562e-09	0.0859778
	PCA 1-10	1	5.60023e-10	3.89525e-10	3.89437e-10	3.89437e-10	3.89525e-10	3.89525e-10	3.89525e-10	2.11513e-08	0.199148	0.0382482	1	3.88207e-10	4.13574e-10	3.88909e-10	3.89261e-10	1	4.96518e-10	0.000910386
	PCA 1-20	1	1	1	1	1	1	1	1	1	1	1	1	1	0.999988	0.999996	1	1	1	1
	PCA 1-50	1	1	1	0.999695	0.997031	0.999984	0.998702	0.999912	1	1	1	1	1.41849e-05	1	0.00015533	0.999976	1	0.999995	1
	PCA 1-100	1	1	1	1	1	1	1	1	1	1	1	1	4.27852e-06	0.999854	1	1	1	1	1
	PCA 1-500	1	0.99991	0.978926	0.0074943	0.000359696	0.197805	0.000645507	0.0589265	1	1	1	1	3.32384e-10	2.54718e-05	4.59056e-10	1	1	0.972942	1
	PCA 1-1000	0.999997	3.89437e-10	3.89525e-10	3.89525e-10	3.89437e-10	3.89437e-10	3.89525e-10	3.89525e-10	4.13947e-10	1.14778e-09	5.49356e-09	2.8949e-08	3.87682e-10	3.88383e-10	3.89437e-10	3.89349e-10	1	3.89349e-10	4.67352e-10
	PCA 1-5000	1	0.996662	0.762492	7.13642e-05	4.69301e-06	0.0135309	1.42758e-05	0.00108859	1	1	1	1	3.87419e-10	5.12987e-06	4.1376e-10	0.0276664	1	1	1
	PCA 1-7047	1	1.8162e-07	5.81416e-09	4.3986e-10	3.89525e-10	4.13853e-10	4.13947e-10	4.67352e-10	0.00137612	0.987067	0.915527	0.999119	3.87769e-10	1.05897e-09	3.88997e-10	1.73274e-09	1	4.3745e-09	1

## Sheet: Fig4_FigS3A Data
This spreadsheet contains the F-scores for classifying out-of-bag pairs of E. coli K12 proteins in the training dataset as not-interacting, indirect PPI, and direct PPI using RF models trained on different features of protein covariation.
Each element in the tables represents the F-score for predicting the indicated interaction type for out-of-bag pairs in the training dataset for a single replicate of randomly partitioning the gold-standard set into training and validation sets.
Colormap ranges from 0 (white) to 1 (green)
Class = "Not-interacting"
Feature	Rep 1	Rep 2	Rep 3	Rep 4	Rep 5	Rep 6	Rep 7	Rep 8	Rep 9	Rep 10	Rep 11	Rep 12	Rep 13	Rep 14	Rep 15	Rep 16	Rep 17	Rep 18	Rep 19	Rep 20	Rep 21	Rep 22	Rep 23	Rep 24	Rep 25	Rep 26	Rep 27	Rep 28	Rep 29	Rep 30	Rep 31	Rep 32	Rep 33	Rep 34	Rep 35	Rep 36	Rep 37	Rep 38	Rep 39	Rep 40	Rep 41	Rep 42	Rep 43	Rep 44	Rep 45	Rep 46	Rep 47	Rep 48	Rep 49
MIWSC	0.995897	0.995998	0.995598	0.995836	0.99606	0.995698	0.996085	0.995996	0.995809	0.995746	0.995947	0.995711	0.995709	0.996123	0.995959	0.996035	0.995611	0.996259	0.99581	0.996097	0.996222	0.995885	0.995611	0.995799	0.996109	0.996035	0.996073	0.995711	0.995698	0.995961	0.995959	0.995959	0.996085	0.996232	0.995935	0.996083	0.99556	0.995984	0.995922	0.996058	0.996048	0.996084	0.995672	0.995761	0.995798	0.996247	0.99591	0.995884	0.995997
Epistasis	0.990502	0.99049	0.99049	0.990528	0.990503	0.990478	0.99049	0.990502	0.990503	0.990528	0.990502	0.990552	0.990577	0.990528	0.990515	0.99054	0.990552	0.990553	0.990528	0.99054	0.99049	0.990528	0.990478	0.990552	0.99049	0.990528	0.99054	0.990503	0.990565	0.990527	0.990528	0.990503	0.990515	0.990503	0.990502	0.990528	0.990527	0.99049	0.990528	0.990478	0.990453	0.990478	0.99054	0.99054	0.990502	0.990515	0.99054	0.99054	0.99049
Y2H	0.990553	0.99054	0.990553	0.990637	0.990526	0.99049	0.990503	0.990477	0.990515	0.990686	0.990502	0.99049	0.990551	0.990539	0.99049	0.99049	0.990637	0.990553	0.990553	0.990553	0.990674	0.990553	0.990452	0.990675	0.990637	0.990478	0.990553	0.990662	0.990674	0.990638	0.990711	0.990539	0.990674	0.990662	0.990465	0.990478	0.99049	0.990626	0.990478	0.990613	0.99049	0.990553	0.990662	0.990649	0.990576	0.990637	0.990662	0.990528	0.990553
APMS1	0.990415	0.990352	0.99044	0.990414	0.990525	0.990289	0.990352	0.990452	0.990414	0.990476	0.990403	0.990414	0.990463	0.990439	0.990377	0.990477	0.990464	0.990302	0.99055	0.990427	0.990489	0.990414	0.990402	0.990402	0.990328	0.990427	0.990401	0.990302	0.990327	0.990328	0.990365	0.990501	0.990351	0.990389	0.990401	0.990327	0.990327	0.990327	0.99044	0.990377	0.990377	0.990377	0.990315	0.990476	0.99039	0.990365	0.99039	0.990377	0.990353
APMS2	0.990577	0.990614	0.990651	0.990626	0.990675	0.990577	0.990626	0.990565	0.990675	0.990638	0.990515	0.990565	0.990577	0.990626	0.990626	0.990626	0.990651	0.990626	0.990638	0.990601	0.990638	0.990515	0.990651	0.990552	0.990565	0.990601	0.990638	0.990638	0.990626	0.990577	0.990577	0.990602	0.990626	0.990638	0.990651	0.990577	0.990651	0.990589	0.990577	0.990601	0.990626	0.990602	0.990614	0.990626	0.990602	0.990614	0.990626	0.990565	0.990601
GC	0.992091	0.991906	0.992056	0.99203	0.992341	0.991906	0.992316	0.992428	0.992069	0.992055	0.99213	0.992241	0.991708	0.992166	0.991881	0.992117	0.991509	0.992266	0.992317	0.992253	0.99249	0.992242	0.992254	0.991347	0.991919	0.992205	0.992118	0.992029	0.992142	0.991979	0.991992	0.991905	0.991982	0.991807	0.992366	0.992342	0.992626	0.992352	0.992055	0.992056	0.992317	0.992051	0.991805	0.992352	0.992166	0.992292	0.99244	0.991979	0.992157
GN	0.991003	0.990819	0.990794	0.990756	0.991053	0.990805	0.990867	0.990978	0.990903	0.990781	0.990819	0.990905	0.991053	0.990953	0.990929	0.990856	0.990769	0.990855	0.990942	0.990905	0.991028	0.99083	0.99093	0.990756	0.990806	0.990954	0.991029	0.991016	0.990991	0.990794	0.991016	0.990805	0.991041	0.990905	0.990991	0.990893	0.990954	0.990916	0.990929	0.990917	0.990918	0.990942	0.990819	0.990905	0.990756	0.990806	0.990955	0.990868	0.990966
GF	0.993332	0.993025	0.993336	0.993058	0.993468	0.992746	0.992783	0.993145	0.992963	0.992855	0.993255	0.993417	0.992996	0.993164	0.992747	0.993321	0.993101	0.993112	0.993409	0.993344	0.993295	0.993406	0.993122	0.992796	0.993108	0.99312	0.993217	0.993147	0.993056	0.992832	0.992948	0.992822	0.993081	0.993246	0.993434	0.992533	0.992934	0.992815	0.992837	0.993311	0.992561	0.992817	0.993708	0.993445	0.992933	0.992836	0.993345	0.993394	0.992723
b-MI	0.985658	0.98588	0.986111	0.986125	0.986265	0.986264	0.986349	0.986234	0.985845	0.986245	0.985959	0.98558	0.986215	0.985843	0.98611	0.985995	0.986502	0.986624	0.985793	0.986012	0.986471	0.986349	0.985418	0.986388	0.986044	0.985997	0.985989	0.986124	0.98542	0.985722	0.986348	0.986183	0.985788	0.986617	0.986501	0.986231	0.98591	0.985529	0.985937	0.98616	0.986072	0.986497	0.985771	0.985948	0.985886	0.986246	0.985856	0.985597	0.98596
Cov	0.986554	0.986314	0.985659	0.986365	0.986237	0.986063	0.985795	0.986189	0.986062	0.986532	0.985994	0.985857	0.986276	0.986664	0.986378	0.986641	0.986313	0.986273	0.986073	0.986411	0.986187	0.986174	0.986277	0.986263	0.986327	0.985771	0.986488	0.985934	0.985087	0.985726	0.98655	0.985597	0.98599	0.986645	0.986262	0.986533	0.985789	0.986486	0.985847	0.986525	0.986715	0.986802	0.98639	0.985839	0.986027	0.986312	0.986589	0.985889	0.985606
PCA 1-5	0.987062	0.986919	0.986519	0.986897	0.987057	0.987156	0.98702	0.987121	0.987361	0.986799	0.98707	0.98701	0.986659	0.987333	0.986873	0.987565	0.986924	0.987096	0.986873	0.987158	0.987108	0.986923	0.98681	0.986774	0.98662	0.986971	0.987346	0.98668	0.986521	0.986622	0.987019	0.987185	0.986773	0.987533	0.986717	0.987309	0.986873	0.987282	0.986569	0.987344	0.987309	0.987174	0.987475	0.986522	0.986635	0.98711	0.987133	0.987086	0.986786
PCA 1-10	0.98891	0.988053	0.988108	0.988157	0.988995	0.988507	0.98833	0.988947	0.988245	0.989024	0.988685	0.988483	0.988871	0.98861	0.988358	0.988366	0.988256	0.988447	0.988532	0.988889	0.988622	0.988849	0.988324	0.988032	0.988662	0.98837	0.988756	0.988806	0.988121	0.988649	0.988546	0.989337	0.988374	0.989146	0.988295	0.988631	0.988271	0.988684	0.988185	0.989486	0.988405	0.988898	0.988673	0.988312	0.988306	0.989202	0.989032	0.988495	0.988535
PCA 1-20	0.990544	0.990596	0.99011	0.990711	0.990459	0.990746	0.990445	0.990872	0.990571	0.990785	0.990859	0.990557	0.990773	0.991223	0.990246	0.990984	0.99096	0.990959	0.990294	0.990508	0.991046	0.990786	0.990148	0.990296	0.990884	0.990433	0.990871	0.990747	0.990284	0.99061	0.990746	0.99121	0.991076	0.990792	0.990395	0.990808	0.990233	0.990857	0.99026	0.991262	0.990523	0.990731	0.990836	0.990697	0.990459	0.990897	0.991272	0.991112	0.990018
PCA 1-50	0.992208	0.992546	0.991986	0.992599	0.992711	0.992111	0.992424	0.992394	0.992197	0.992195	0.992409	0.991584	0.992147	0.992822	0.99191	0.992423	0.992022	0.992598	0.992459	0.992499	0.992386	0.992297	0.991708	0.991998	0.992722	0.992737	0.992234	0.99251	0.992136	0.99211	0.992498	0.992862	0.992775	0.993059	0.992261	0.992596	0.992085	0.992484	0.992061	0.992585	0.992221	0.992572	0.992411	0.992098	0.992184	0.992709	0.992573	0.992674	0.99246
PCA 1-100	0.993035	0.992861	0.992009	0.993049	0.992434	0.992523	0.992975	0.992974	0.992471	0.992863	0.992885	0.992348	0.992598	0.9933	0.992336	0.993062	0.992823	0.992887	0.992986	0.99246	0.993274	0.993051	0.992427	0.99255	0.992872	0.992711	0.992849	0.992661	0.992523	0.9928	0.992987	0.992685	0.992622	0.993259	0.993012	0.992773	0.991959	0.992722	0.992262	0.992724	0.992347	0.993387	0.992837	0.99275	0.992474	0.992598	0.99285	0.992611	0.993274
PCA 1-500	0.990162	0.990186	0.990237	0.990538	0.9903	0.989937	0.990135	0.990552	0.989899	0.990677	0.99041	0.990158	0.990451	0.990839	0.990365	0.990424	0.990099	0.990512	0.990648	0.990164	0.990875	0.990573	0.990689	0.990364	0.990739	0.990578	0.990474	0.99041	0.990115	0.990565	0.990527	0.990665	0.990175	0.990949	0.990589	0.990724	0.989927	0.990037	0.990187	0.990749	0.990174	0.990684	0.990815	0.990627	0.990153	0.99016	0.9901	0.990025	0.989971
PCA 1-1000	0.988773	0.988547	0.988487	0.989252	0.988714	0.988525	0.988612	0.98904	0.988134	0.989028	0.988485	0.989038	0.988752	0.989254	0.988999	0.989038	0.98845	0.988937	0.988887	0.988886	0.989587	0.988798	0.988829	0.988364	0.988829	0.988665	0.989063	0.988445	0.988388	0.98864	0.989287	0.988662	0.98829	0.98961	0.988742	0.989114	0.988428	0.988888	0.989001	0.988823	0.988952	0.989047	0.988837	0.988565	0.988514	0.988574	0.988688	0.988515	0.988571
PCA 1-5000	0.98636	0.987077	0.986467	0.986097	0.986515	0.986464	0.986563	0.98645	0.986811	0.986512	0.986224	0.986351	0.986199	0.986654	0.986687	0.986787	0.986781	0.986841	0.986396	0.986285	0.986449	0.986312	0.986265	0.986439	0.986485	0.98639	0.986334	0.98621	0.986127	0.98633	0.986676	0.986083	0.985696	0.986919	0.986374	0.986751	0.986076	0.986765	0.986174	0.986449	0.986213	0.986521	0.98669	0.98648	0.986047	0.986226	0.986364	0.986101	0.986815
PCA 1-7047	0.985735	0.986353	0.985662	0.986231	0.986257	0.985787	0.986188	0.98585	0.986124	0.985674	0.985823	0.985862	0.985586	0.986111	0.98606	0.985961	0.986354	0.98624	0.985708	0.986225	0.986177	0.985588	0.985533	0.985911	0.986429	0.985345	0.986071	0.98571	0.985488	0.985538	0.986417	0.985917	0.985516	0.986597	0.985827	0.985707	0.986032	0.986063	0.985319	0.986166	0.985605	0.98621	0.985588	0.985536	0.985792	0.985773	0.9857	0.985649	0.985922
Class = "Indirect PPI"
Feature	Rep 1	Rep 2	Rep 3	Rep 4	Rep 5	Rep 6	Rep 7	Rep 8	Rep 9	Rep 10	Rep 11	Rep 12	Rep 13	Rep 14	Rep 15	Rep 16	Rep 17	Rep 18	Rep 19	Rep 20	Rep 21	Rep 22	Rep 23	Rep 24	Rep 25	Rep 26	Rep 27	Rep 28	Rep 29	Rep 30	Rep 31	Rep 32	Rep 33	Rep 34	Rep 35	Rep 36	Rep 37	Rep 38	Rep 39	Rep 40	Rep 41	Rep 42	Rep 43	Rep 44	Rep 45	Rep 46	Rep 47	Rep 48	Rep 49
MIWSC	0.745098	0.758566	0.731438	0.742812	0.756584	0.73834	0.761301	0.757977	0.745342	0.750774	0.757098	0.741093	0.741259	0.759171	0.754124	0.756289	0.730739	0.774295	0.735596	0.760921	0.765957	0.74901	0.732595	0.739792	0.760408	0.755556	0.755344	0.732484	0.740331	0.748603	0.751572	0.755278	0.761905	0.770642	0.753737	0.762791	0.734534	0.759375	0.756672	0.760343	0.760697	0.754717	0.741085	0.748006	0.745036	0.765217	0.753145	0.747664	0.747443
Epistasis	0.00274348	NaN	NaN	NaN	NaN	NaN	NaN	0.00274348	NaN	NaN	0.00274348	0.00275862	0.00551724	NaN	NaN	NaN	0.00550206	NaN	NaN	NaN	0.00273973	NaN	NaN	0.00550206	0.00273973	NaN	0.00549451	NaN	0.00550964	0.00275103	NaN	NaN	NaN	NaN	0.00274348	NaN	0.00275103	NaN	NaN	NaN	NaN	NaN	NaN	NaN	0.00274348	NaN	NaN	NaN	NaN
Y2H	NaN	NaN	NaN	NaN	NaN	NaN	NaN	NaN	NaN	NaN	NaN	NaN	NaN	NaN	NaN	NaN	NaN	NaN	NaN	NaN	0.0242261	NaN	NaN	NaN	NaN	NaN	NaN	NaN	NaN	NaN	NaN	0.00273224	NaN	NaN	NaN	NaN	NaN	NaN	NaN	NaN	NaN	NaN	NaN	NaN	NaN	NaN	NaN	NaN	NaN
APMS1	NaN	0.00546448	0.00547945	NaN	0.00818554	NaN	NaN	NaN	NaN	0.00820793	NaN	0.00547196	0.00546448	0.00547196	NaN	NaN	0.00547196	0.00270636	0.0136426	NaN	NaN	0.010929	NaN	NaN	NaN	0.00820793	0.00271739	0.00544218	NaN	NaN	NaN	0.00273973	NaN	NaN	0.00547945	0.00542741	NaN	0.00544218	0.00275482	0.00273598	0.00274348	NaN	0.00547945	0.00544959	NaN	0.00273973	NaN	0.00273973	NaN
APMS2	NaN	0.00551724	0.00551724	NaN	0.00551724	NaN	0.00551724	NaN	0.00551724	0.00551724	NaN	NaN	NaN	0.00551724	NaN	NaN	0.00550964	NaN	0.00551724	0.00551724	0.00550964	NaN	0.00551724	NaN	NaN	NaN	NaN	NaN	0.00275862	NaN	0.00551724	NaN	NaN	0.00551724	0.00551724	NaN	0.00551724	NaN	0.00276243	NaN	0.00551724	NaN	0.00276243	NaN	NaN	NaN	NaN	NaN	NaN
GC	0.366795	0.338883	0.340257	0.357629	0.375852	0.33366	0.382896	0.370079	0.33	0.355122	0.357629	0.37001	0.319842	0.363988	0.331373	0.358824	0.303271	0.358621	0.367026	0.359726	0.389484	0.361849	0.375121	0.272637	0.343254	0.363992	0.342914	0.355556	0.36239	0.353398	0.356244	0.336904	0.339585	0.316929	0.379277	0.361111	0.412668	0.380403	0.349951	0.338308	0.371175	0.387698	0.342691	0.399232	0.375479	0.348515	0.367546	0.348837	0.342971
GN	0.0646831	0.0418301	0.0449141	0.0445026	0.0498034	0.0443864	0.064433	0.0780234	0.0466926	0.0521512	0.0447368	0.0522193	0.08	0.0694087	0.0574413	0.0524934	0.0316206	0.0675325	0.054902	0.0573664	0.0520156	0.0393185	0.0551905	0.0419948	0.0630749	0.0625	0.0498688	0.0500659	0.0722581	0.0447368	0.0548303	0.0496084	0.0707733	0.0604468	0.0696774	0.0527009	0.0624187	0.0699482	0.0750323	0.0503311	0.0473062	0.05	0.0473684	0.0393701	0.0393185	0.0445609	0.0682415	0.0447368	0.0496084
GF	0.537705	0.500426	0.530264	0.531687	0.547368	0.492129	0.509388	0.535714	0.501706	0.529738	0.538524	0.547352	0.512438	0.496056	0.496266	0.539867	0.503057	0.506438	0.543786	0.549593	0.542041	0.553295	0.513333	0.493907	0.533773	0.518092	0.541499	0.528333	0.527508	0.527666	0.5	0.510221	0.53528	0.525269	0.534224	0.487805	0.515	0.533541	0.503804	0.519019	0.484545	0.528991	0.558996	0.543496	0.525547	0.49577	0.532895	0.545012	0.490909
b-MI	0.250678	0.275954	0.270977	0.264281	0.255587	0.263889	0.278464	0.281037	0.268737	0.285132	0.260929	0.257891	0.25523	0.267206	0.276902	0.273713	0.277739	0.294563	0.261044	0.255878	0.291752	0.272099	0.247823	0.276389	0.267653	0.268942	0.292359	0.267956	0.242915	0.247253	0.278273	0.278912	0.245663	0.320427	0.283345	0.284943	0.25529	0.253351	0.267218	0.26685	0.277133	0.285324	0.258283	0.25648	0.257398	0.275628	0.271871	0.241261	0.262295
Cov	0.27727	0.279972	0.248304	0.270383	0.273352	0.257439	0.261695	0.269553	0.268966	0.271378	0.274563	0.270088	0.272033	0.293259	0.275958	0.28053	0.275623	0.278689	0.264928	0.28063	0.267402	0.273728	0.261838	0.278429	0.270645	0.254942	0.284924	0.262474	0.212912	0.249827	0.284138	0.249149	0.250175	0.314939	0.276625	0.300203	0.248619	0.29255	0.25974	0.283137	0.297278	0.293501	0.265734	0.241331	0.258873	0.27354	0.289674	0.243599	0.263973
PCA 1-5	0.32133	0.340054	0.313008	0.323953	0.329045	0.342123	0.335598	0.334012	0.346101	0.311813	0.334922	0.329235	0.305802	0.350782	0.321965	0.343619	0.3189	0.331741	0.321258	0.338983	0.33537	0.31912	0.312288	0.310867	0.309054	0.324472	0.348837	0.317139	0.303072	0.302947	0.328841	0.339519	0.323288	0.365359	0.32107	0.339261	0.318151	0.354926	0.316644	0.342972	0.339006	0.325517	0.342817	0.308954	0.306319	0.332879	0.341962	0.318089	0.312543
PCA 1-10	0.425154	0.387011	0.38425	0.399732	0.435365	0.408631	0.409946	0.428571	0.395145	0.426298	0.416667	0.385965	0.420339	0.414402	0.398111	0.406125	0.400536	0.397009	0.407032	0.406993	0.40327	0.414414	0.391245	0.381855	0.406897	0.396482	0.420416	0.419919	0.382573	0.402759	0.399458	0.441828	0.402464	0.439456	0.390572	0.41929	0.391275	0.418983	0.388775	0.447639	0.408759	0.406293	0.409029	0.388966	0.407008	0.430556	0.439678	0.411051	0.410361
PCA 1-20	0.512097	0.518767	0.488404	0.520303	0.504054	0.524679	0.516734	0.525102	0.504065	0.524813	0.527532	0.511785	0.519427	0.541096	0.49729	0.529452	0.532335	0.527532	0.504359	0.510438	0.53794	0.514756	0.492476	0.487838	0.522849	0.504736	0.523681	0.518367	0.495935	0.517711	0.518015	0.537988	0.523611	0.538614	0.504395	0.528302	0.501016	0.532798	0.497601	0.539792	0.504431	0.522438	0.519231	0.513936	0.511848	0.525886	0.548805	0.517956	0.494322
PCA 1-50	0.599866	0.610811	0.572603	0.604493	0.612748	0.582538	0.599451	0.615486	0.585135	0.607764	0.604558	0.560596	0.587601	0.619565	0.578019	0.59618	0.59032	0.61077	0.607287	0.600547	0.59849	0.59742	0.567184	0.575902	0.612162	0.613169	0.591796	0.599322	0.588798	0.584239	0.605567	0.612329	0.615702	0.634409	0.593601	0.610851	0.583784	0.602703	0.581395	0.607817	0.596491	0.610398	0.59808	0.585366	0.604462	0.62027	0.606102	0.60929	0.601227
PCA 1-100	0.62304	0.616746	0.575101	0.612526	0.590848	0.5892	0.617708	0.616016	0.59543	0.600414	0.612466	0.590567	0.593197	0.627235	0.581793	0.616963	0.606267	0.606726	0.617385	0.595109	0.626111	0.618157	0.580014	0.582296	0.608637	0.601235	0.6157	0.59673	0.599729	0.60702	0.608396	0.598232	0.602961	0.631296	0.604396	0.602703	0.572005	0.607407	0.584131	0.594114	0.588076	0.628611	0.600687	0.601782	0.591934	0.595658	0.615172	0.592896	0.621826
PCA 1-500	0.454859	0.451791	0.459516	0.478231	0.470994	0.445675	0.462064	0.482903	0.441684	0.488486	0.475801	0.475034	0.467967	0.482951	0.456781	0.470669	0.452675	0.485891	0.482192	0.459706	0.495146	0.485183	0.47732	0.470014	0.482903	0.468684	0.469136	0.472279	0.445225	0.469686	0.460251	0.478656	0.460263	0.502396	0.481559	0.48376	0.44724	0.455609	0.467909	0.497238	0.459219	0.492245	0.479269	0.479327	0.45582	0.458503	0.454233	0.452282	0.459039
PCA 1-1000	0.387097	0.384772	0.37414	0.415566	0.382415	0.374309	0.377671	0.396359	0.369461	0.40028	0.381992	0.400277	0.383008	0.40113	0.405238	0.403594	0.373444	0.401656	0.391185	0.39396	0.432507	0.388243	0.382498	0.362752	0.376853	0.368973	0.404432	0.390508	0.376891	0.385475	0.42011	0.389807	0.359189	0.444596	0.380212	0.407767	0.369748	0.391123	0.412698	0.395333	0.397232	0.398907	0.388122	0.386063	0.384189	0.380756	0.377332	0.37404	0.388323
PCA 1-5000	0.262585	0.297372	0.256303	0.253579	0.259595	0.265278	0.267771	0.274725	0.284932	0.273481	0.255319	0.257261	0.249483	0.26676	0.283162	0.285911	0.267895	0.278285	0.271739	0.263014	0.263555	0.256552	0.248957	0.269523	0.275956	0.261656	0.269831	0.25256	0.239888	0.236953	0.266943	0.256757	0.239513	0.305724	0.262724	0.278973	0.251214	0.275332	0.258727	0.257753	0.263994	0.273898	0.266202	0.251052	0.253579	0.248611	0.26087	0.237171	0.27894
PCA 1-7047	0.242177	0.251924	0.226051	0.245042	0.238701	0.241096	0.255349	0.241213	0.257534	0.235213	0.23989	0.240881	0.224363	0.25447	0.256305	0.24397	0.251228	0.251572	0.237288	0.257439	0.250693	0.225294	0.232747	0.24571	0.25229	0.227642	0.264586	0.239234	0.221147	0.222529	0.248945	0.231579	0.216783	0.287075	0.231037	0.250508	0.234795	0.245687	0.227609	0.244382	0.251007	0.262116	0.227586	0.227116	0.231254	0.234973	0.237078	0.21978	0.246259
Class = "Direct PPI"
Feature	Rep 1	Rep 2	Rep 3	Rep 4	Rep 5	Rep 6	Rep 7	Rep 8	Rep 9	Rep 10	Rep 11	Rep 12	Rep 13	Rep 14	Rep 15	Rep 16	Rep 17	Rep 18	Rep 19	Rep 20	Rep 21	Rep 22	Rep 23	Rep 24	Rep 25	Rep 26	Rep 27	Rep 28	Rep 29	Rep 30	Rep 31	Rep 32	Rep 33	Rep 34	Rep 35	Rep 36	Rep 37	Rep 38	Rep 39	Rep 40	Rep 41	Rep 42	Rep 43	Rep 44	Rep 45	Rep 46	Rep 47	Rep 48	Rep 49
MIWSC	0.666667	0.606061	0.523077	0.575758	0.57971	0.516129	0.597015	0.636364	0.4375	0.523077	0.603175	0.584615	0.492754	0.603175	0.584615	0.5	0.492308	0.516129	0.637681	0.529412	0.606061	0.507463	0.454545	0.636364	0.732394	0.636364	0.413793	0.571429	0.5	0.459016	0.722222	0.537313	0.451613	0.5625	0.447761	0.617647	0.461538	0.606061	0.47619	0.520548	0.526316	0.647059	0.666667	0.375	0.575758	0.515152	0.517241	0.545455	0.636364
Epistasis	NaN	NaN	NaN	NaN	NaN	NaN	NaN	NaN	NaN	NaN	NaN	NaN	NaN	NaN	NaN	NaN	NaN	NaN	NaN	NaN	NaN	NaN	NaN	NaN	NaN	NaN	NaN	NaN	NaN	NaN	NaN	NaN	NaN	NaN	NaN	NaN	NaN	NaN	NaN	NaN	NaN	NaN	NaN	NaN	NaN	NaN	NaN	NaN	NaN
Y2H	NaN	NaN	NaN	0.271186	NaN	NaN	NaN	0.0416667	NaN	0.327869	NaN	NaN	0.037037	0.113208	NaN	NaN	0.305085	NaN	NaN	NaN	NaN	NaN	NaN	0.259259	0.245614	NaN	NaN	0.271186	0.322581	NaN	0.166667	NaN	0.310345	0.290909	NaN	NaN	NaN	0.0416667	NaN	0.218182	NaN	NaN	0.338983	0.206897	0.111111	0.237288	0.271186	NaN	NaN
APMS1	0.0392157	NaN	NaN	0.122449	0.153846	0.0350877	0.0357143	0.0444444	0.0754717	NaN	NaN	0.0408163	0.115385	0.0392157	0.0384615	NaN	0.0816327	0.04	0.125	0.117647	0.12766	NaN	0.0769231	0.0392157	NaN	0.04	NaN	NaN	NaN	NaN	0.04	0.0816327	0.0740741	0.08	0.0727273	NaN	NaN	0.0384615	NaN	0.0769231	NaN	NaN	NaN	0.0816327	NaN	NaN	NaN	NaN	NaN
APMS2	0.136364	0.139535	0.291667	0.291667	0.333333	0.136364	0.181818	0.0930233	0.333333	0.222222	NaN	0.0930233	0.136364	0.181818	0.26087	0.26087	0.297872	0.26087	0.255319	0.136364	0.291667	NaN	0.26087	0.0909091	0.0930233	0.217391	0.297872	0.297872	0.26087	0.136364	0.0909091	0.181818	0.26087	0.255319	0.26087	0.136364	0.26087	0.139535	0.133333	0.255319	0.181818	0.181818	0.217391	0.26087	0.181818	0.222222	0.26087	0.0930233	0.217391
GC	0.555556	0.447368	0.472222	0.5	0.533333	0.486486	0.630137	0.519481	0.487179	0.5	0.457143	0.520548	0.564103	0.533333	0.592593	0.473684	0.589744	0.578313	0.493151	0.595238	0.575342	0.547945	0.555556	0.481928	0.692308	0.56338	0.545455	0.472222	0.613333	0.481013	0.478873	0.538462	0.459459	0.38961	0.547945	0.486486	0.507042	0.447368	0.428571	0.615385	0.493151	0.676471	0.459459	0.657534	0.529412	0.475	0.43038	0.597403	0.4
GN	0.229508	0.148148	0.310345	0.333333	0.369231	0.266667	0.113208	0.327869	0.184615	0.20339	0.237288	0.266667	0.181818	0.166667	0.233333	0.185185	0.3	0.266667	0.206897	0.105263	0.222222	0.338462	0.163934	0.3	0.20339	0.172414	0.3	0.30303	0.206897	0.196721	0.163934	0.129032	0.354839	0.101695	0.214286	0.206897	0.163934	0.229508	0.0727273	0.323529	0.266667	0.327869	0.237288	0.28125	0.196721	0.140351	0.214286	0.295082	0.253968
GF	0.26087	0.318841	0.473684	0.513514	0.328767	0.313253	0.473684	0.333333	0.369231	0.351351	0.47619	0.228571	0.384615	0.461538	0.320988	0.333333	0.506024	0.447368	0.354839	0.3125	0.338983	0.473684	0.393939	0.208955	0.4	0.297297	0.494118	0.375	0.467532	0.5	0.3125	0.349206	0.333333	0.366197	0.289855	0.273973	0.467532	0.473684	0.405405	0.363636	0.473684	0.518519	0.473684	0.373333	0.40625	0.467532	0.166667	0.208955	0.333333
b-MI	0.24	0.25641	0.253165	0.32	0.35443	0.311688	0.289474	0.345679	0.219178	0.271605	0.337349	0.275	0.285714	0.285714	0.146341	0.275	0.240964	0.278481	0.351351	0.395062	0.37037	0.285714	0.173913	0.320988	0.373333	0.278481	0.235294	0.341463	0.257143	0.325581	0.37037	0.197531	0.2	0.205128	0.28169	0.35	0.243243	0.303797	0.08	0.321839	0.222222	0.441558	0.289855	0.216216	0.170732	0.213333	0.25974	0.313253	0.25974
Cov	0.35443	0.243243	0.273973	0.342105	0.266667	0.230769	0.345679	0.282353	0.246914	0.225352	0.27027	0.210526	0.253165	0.275	0.246575	0.27027	0.253165	0.277778	0.296296	0.297297	0.3	0.236842	0.205128	0.216216	0.373333	0.303797	0.213333	0.341463	0.219178	0.197531	0.405405	0.186667	0.128205	0.194444	0.222222	0.222222	0.173913	0.228571	0.227848	0.337349	0.263158	0.305882	0.379747	0.164384	0.207792	0.210526	0.0810811	0.333333	0.157895
PCA 1-5	0.240964	0.0789474	0.0952381	0.114943	0.170732	0.162791	0.190476	0.202532	0.106667	0.157895	0.188235	0.151899	0.175	0.195122	0.189189	0.206897	0.12987	0.164706	0.233766	0.243902	0.195122	0.214286	0.114286	0.15	0.211765	0.148148	0.159091	0.206897	0.188235	0.114943	0.225	0.119048	0.05	0.0533333	0.155844	0.120482	0.179104	0.123457	0.121951	0.25974	0.131579	0.190476	0.235294	0.168675	0.120482	0.181818	NaN	0.25	0.179487
PCA 1-10	0.166667	0.0512821	0.097561	0.142857	0.202899	0.128205	0.179775	0.2	0.177215	0.117647	0.192771	0.133333	0.177215	0.191781	0.191781	0.227273	0.131579	0.106667	0.195122	0.235294	0.175	0.183908	0.111111	0.119048	0.207792	0.146341	0.121951	0.192771	0.141176	0.142857	0.227848	0.144578	0.0533333	0.113636	0.191781	0.128205	0.120482	0.128205	0.097561	0.25641	0.0882353	0.225	0.175	0.126582	0.117647	0.111111	NaN	0.205128	0.162162
PCA 1-20	0.204545	0.222222	0.103896	0.159091	0.126582	0.123457	0.230769	0.275	0.225	0.157895	0.195122	0.177778	0.233766	0.190476	0.166667	0.261905	0.2	0.170732	0.216867	0.25641	0.195122	0.225	0.142857	0.2	0.273973	0.188235	0.142857	0.25641	0.186667	0.144578	0.247191	0.159091	0.0526316	0.151899	0.131868	0.192771	0.146341	0.197531	0.136364	0.317073	0.126582	0.25	0.26506	0.155844	0.175	0.125	0.0470588	0.278481	0.192771
PCA 1-50	0.179487	0.0714286	0.120482	0.169014	0.175	0.191781	0.216216	0.213333	0.184211	0.121951	0.16	0.119048	0.131579	0.261905	0.186667	0.175	0.141176	0.151899	0.17284	0.25641	0.227273	0.197531	0.0714286	0.136986	0.175	0.164384	0.153846	0.179487	0.148148	0.106667	0.227848	0.164384	0.138889	0.109589	0.184211	0.17284	0.08	0.126582	0.0493827	0.219178	0.125	0.202532	0.246914	0.114286	0.128205	0.126582	0.0266667	0.179487	0.170732
PCA 1-100	0.219512	0.157895	0.0987654	0.126582	0.246914	0.148148	0.238806	0.246914	0.157895	0.162162	0.181818	0.148148	0.216216	0.222222	0.195122	0.219178	0.153846	0.131579	0.27907	0.253165	0.246575	0.233766	0.103896	0.125	0.219512	0.166667	0.213333	0.233766	0.189189	0.225352	0.236842	0.219512	0.0571429	0.153846	0.155844	0.138889	0.16	0.164384	0.056338	0.311688	0.0952381	0.320988	0.25	0.112676	0.109589	0.142857	0.0769231	0.233766	0.133333
PCA 1-500	0.390244	0.282353	0.309524	0.289474	0.292683	0.333333	0.414634	0.405063	0.320988	0.337662	0.368421	0.271605	0.25641	0.410256	0.317073	0.313253	0.263158	0.375	0.390244	0.452381	0.317073	0.382022	0.341463	0.395062	0.425	0.38961	0.342105	0.309524	0.305882	0.25	0.410256	0.243243	0.197531	0.293333	0.307692	0.382022	0.240964	0.289474	0.275	0.418605	0.303797	0.368421	0.375	0.197531	0.333333	0.383562	0.246575	0.414634	0.311688
PCA 1-1000	0.518519	0.278481	0.346667	0.453333	0.365854	0.315789	0.435897	0.409639	0.268293	0.426667	0.38961	0.253165	0.282051	0.5	0.43038	0.342105	0.45	0.365854	0.43038	0.4	0.43038	0.373333	0.197531	0.435897	0.455696	0.410256	0.4	0.433735	0.318841	0.266667	0.519481	0.266667	0.230769	0.4	0.4	0.453333	0.289474	0.379747	0.238806	0.53012	0.358209	0.512195	0.37037	0.289474	0.373333	0.48	0.297297	0.410256	0.37037
PCA 1-5000	0.521739	0.4	0.347826	0.493506	0.435897	0.426667	0.5	0.5	0.32	0.405063	0.426667	0.315789	0.405063	0.5	0.421053	0.368421	0.363636	0.4	0.384615	0.409639	0.415584	0.35443	0.293333	0.361111	0.493506	0.473684	0.405405	0.486486	0.384615	0.289474	0.578947	0.30137	0.305556	0.415584	0.425	0.43038	0.25974	0.461538	0.356164	0.506024	0.324324	0.426667	0.5	0.305556	0.266667	0.384615	0.4	0.526316	0.441558
PCA 1-7047	0.405797	0.455696	0.358974	0.475	0.411765	0.478873	0.5	0.493506	0.314286	0.358974	0.43038	0.421053	0.365854	0.455696	0.305556	0.487805	0.38961	0.384615	0.405405	0.455696	0.472222	0.447368	0.338028	0.605263	0.617284	0.461538	0.421053	0.487179	0.351351	0.378378	0.519481	0.27027	0.285714	0.447368	0.373333	0.384615	0.324324	0.421053	0.338028	0.379747	0.311688	0.513514	0.373333	0.325	0.315789	0.394737	0.356164	0.459459	0.405405
[truncated: 4 more columns]

## Sheet: Fig4_FigS3A Statistics
Each element contains the p-value for the statistical comparison of the median F-score for model trained on the feature listed in the row versus column using a one-sided Wilcoxon Rank Sum test
A significant p-value supports the hypothesis that the models trained on the feature in the row have a greater F-score for predicting the indicated interaction type compared to models trained on the feature listed in the column
Not-interacting
	Feature	MIWSC	Epistasis	Y2H	APMS1	APMS2	GC	GN	GF	b-MI	Cov	PCA 1-5	PCA 1-10	PCA 1-20	PCA 1-50	PCA 1-100	PCA 1-500	PCA 1-1000	PCA 1-5000	PCA 1-7047
	MIWSC	1	3.89525e-10	3.89525e-10	3.89525e-10	3.89525e-10	3.89525e-10	3.89525e-10	3.89525e-10	3.89525e-10	3.89525e-10	3.89525e-10	3.89525e-10	3.89525e-10	3.89525e-10	3.89525e-10	3.89525e-10	3.89525e-10	3.89525e-10	3.89525e-10
	Epistasis	1	1	0.98744	1	1	1	1	1	1	1	1	0.00129842	1	1	1	1	1	1	1
	Y2H	1	0.0128768	1	1	1	1	1	1	1	1	0.999987	3.12524e-06	1	1	1	1	1	1	1
	APMS1	1	3.89525e-10	3.89525e-10	1	1	1	1	1	1	1	5.95073e-10	3.89525e-10	1	1	1	1	1	1	1
	APMS2	1	3.89525e-10	3.89525e-10	3.89525e-10	1	1	1	1	1	0.999661	3.89525e-10	3.89525e-10	1	1	1	1	1	1	1
	GC	1	3.89525e-10	3.89525e-10	3.89525e-10	3.89525e-10	1	1	1	9.72452e-07	3.89525e-10	3.89525e-10	3.89525e-10	0.000404514	0.00470577	7.28714e-07	0.0465107	1	0.999941	1
	GN	1	3.89525e-10	3.89525e-10	3.89525e-10	3.89525e-10	3.89525e-10	1	1	3.89525e-10	3.89525e-10	3.89525e-10	3.89525e-10	3.89525e-10	3.89525e-10	3.89525e-10	3.89525e-10	6.69512e-06	3.89525e-10	1
	GF	1	3.89525e-10	3.89525e-10	3.89525e-10	3.89525e-10	3.89525e-10	1.5039e-08	1	3.89525e-10	3.89525e-10	3.89525e-10	3.89525e-10	3.89525e-10	3.89525e-10	3.89525e-10	3.89525e-10	2.06567e-09	3.89525e-10	0.999999
	b-MI	1	3.89525e-10	3.89525e-10	3.89525e-10	3.89525e-10	0.999999	1	1	1	3.89525e-10	3.89525e-10	3.89525e-10	0.99516	0.999705	0.580323	0.99997	1	1	1
	Cov	1	3.89525e-10	3.89525e-10	3.89525e-10	0.000351635	1	1	1	1	1	3.89525e-10	3.89525e-10	1	1	1	1	1	1	1
	PCA 1-5	1	6.15291e-09	1.33944e-05	1	1	1	1	1	1	1	1	4.96518e-10	1	1	1	1	1	1	1
	PCA 1-10	1	0.998742	0.999997	1	1	1	1	1	1	1	1	1	1	1	1	1	1	1	1
	PCA 1-20	1	3.89525e-10	3.89525e-10	3.89525e-10	3.89525e-10	0.999609	1	1	0.00497697	3.89525e-10	3.89525e-10	3.89525e-10	1	0.999965	5.95073e-10	1	1	1	1
	PCA 1-50	1	3.89525e-10	3.89525e-10	3.89525e-10	3.89525e-10	0.995425	1	1	0.000305241	3.89525e-10	3.89525e-10	3.89525e-10	3.68223e-05	1	3.89525e-10	0.999389	1	1	1
	PCA 1-100	1	3.89525e-10	3.89525e-10	3.89525e-10	3.89525e-10	0.999999	1	1	0.423454	3.89525e-10	3.89525e-10	3.89525e-10	1	1	1	1	1	1	1
	PCA 1-500	1	3.89525e-10	3.89525e-10	3.89525e-10	3.89525e-10	0.954421	1	1	3.08634e-05	3.89525e-10	3.89525e-10	3.89525e-10	7.32118e-10	0.000631554	3.89437e-10	1	1	1	1
	PCA 1-1000	1	3.89525e-10	3.89525e-10	3.89525e-10	3.89525e-10	3.89525e-10	0.999994	1	3.89525e-10	3.89525e-10	3.89525e-10	3.89525e-10	3.89525e-10	3.89525e-10	3.89525e-10	3.89525e-10	1	3.89525e-10	1
	PCA 1-5000	1	3.89525e-10	3.89525e-10	3.89525e-10	3.89525e-10	6.10167e-05	1	1	4.3986e-10	3.89525e-10	3.89525e-10	3.89525e-10	3.89525e-10	3.89525e-10	3.89525e-10	3.89525e-10	1	1	1
	PCA 1-7047	1	3.89525e-10	3.89525e-10	3.89525e-10	3.89525e-10	3.89525e-10	4.67352e-10	1.5617e-06	3.89525e-10	3.89525e-10	3.89525e-10	3.89525e-10	3.89525e-10	3.89525e-10	3.89525e-10	3.89525e-10	3.89525e-10	3.89525e-10	1
Indirect
	Feature	MIWSC	Epistasis	Y2H	APMS1	APMS2	GC	GN	GF	b-MI	Cov	PCA 1-5	PCA 1-10	PCA 1-20	PCA 1-50	PCA 1-100	PCA 1-500	PCA 1-1000	PCA 1-5000	PCA 1-7047
	MIWSC	1	3.89525e-10	3.89525e-10	3.89525e-10	3.89525e-10	3.89525e-10	3.89525e-10	3.89525e-10	3.89525e-10	3.89525e-10	3.89525e-10	3.89525e-10	3.89525e-10	3.89525e-10	3.89525e-10	3.89525e-10	3.89525e-10	3.89525e-10	3.89525e-10
	Epistasis	1	1	0.7995	1	1	1	1	1	1	1	0.00691621	4.13947e-10	3.89525e-10	3.89525e-10	3.89525e-10	3.89525e-10	1	3.89525e-10	1
	Y2H	1	0.203218	1	1	1	1	1	1	1	1	0.00200943	4.3986e-10	3.89525e-10	3.89525e-10	3.89525e-10	3.89525e-10	1	3.89525e-10	1
	APMS1	1	3.89525e-10	3.89525e-10	1	1	1	1	1	1	1	3.89525e-10	3.89525e-10	3.89525e-10	3.89525e-10	3.89525e-10	3.89525e-10	0.999999	3.89525e-10	1
	APMS2	1	3.89525e-10	3.89525e-10	3.89525e-10	1	1	1	1	1	6.00116e-07	3.89525e-10	3.89525e-10	3.89525e-10	3.89525e-10	3.89525e-10	3.89525e-10	6.71114e-10	3.89525e-10	1
	GC	1	3.89525e-10	3.89525e-10	3.89525e-10	3.89525e-10	1	1	1	3.89525e-10	3.89525e-10	3.89525e-10	3.89525e-10	3.89525e-10	3.89437e-10	3.89525e-10	3.89437e-10	3.89525e-10	3.89525e-10	0.908595
	GN	1	3.89525e-10	3.89525e-10	3.89525e-10	3.89525e-10	3.89525e-10	1	0.985432	3.89525e-10	3.89525e-10	3.89525e-10	3.89525e-10	3.89525e-10	3.89525e-10	3.89525e-10	3.89525e-10	3.89525e-10	3.89525e-10	3.89525e-10
	GF	1	3.89525e-10	3.89525e-10	3.89525e-10	3.89525e-10	3.89525e-10	0.0149283	1	3.89525e-10	3.89525e-10	3.89525e-10	3.89525e-10	3.89525e-10	3.89525e-10	3.89525e-10	3.89525e-10	3.89525e-10	3.89525e-10	3.89525e-10
	b-MI	1	3.89525e-10	3.89525e-10	3.89525e-10	3.89525e-10	1	1	1	1	3.89525e-10	3.89525e-10	3.89525e-10	3.89525e-10	3.89437e-10	3.89437e-10	3.89437e-10	3.89525e-10	3.89525e-10	1
	Cov	1	3.89525e-10	3.89525e-10	3.89525e-10	0.999999	1	1	1	1	1	3.89525e-10	3.89525e-10	3.89525e-10	3.89525e-10	3.89525e-10	3.89525e-10	4.90309e-09	3.89525e-10	1
	PCA 1-5	1	0.993268	0.998051	1	1	1	1	1	1	1	1	3.89525e-10	3.89525e-10	3.89437e-10	3.89437e-10	3.89437e-10	1	3.89525e-10	1
	PCA 1-10	1	1	1	1	1	1	1	1	1	1	1	1	3.89525e-10	3.89525e-10	3.89525e-10	3.89525e-10	1	3.89525e-10	1
	PCA 1-20	1	1	1	1	1	1	1	1	1	1	1	1	1	0.0043843	0.97936	0.998427	1	1	1
	PCA 1-50	1	1	1	1	1	1	1	1	1	1	1	1	0.996239	1	0.999931	0.999775	1	1	1
	PCA 1-100	1	1	1	1	1	1	1	1	1	1	1	1	0.0214687	7.65056e-05	1	0.444579	1	1	1
	PCA 1-500	1	1	1	1	1	1	1	1	1	1	1	1	0.00167699	0.000255339	0.561891	1	1	1	1
	PCA 1-1000	1	4.67352e-10	4.3986e-10	5.44302e-07	1	1	1	1	1	1	3.89525e-10	3.89525e-10	3.89525e-10	3.89437e-10	3.89437e-10	3.89437e-10	1	3.89525e-10	1
	PCA 1-5000	1	1	1	1	1	1	1	1	1	1	1	1	3.89437e-10	3.89085e-10	3.89437e-10	3.88997e-10	1	1	1
	PCA 1-7047	1	3.89525e-10	3.89525e-10	3.89525e-10	3.89525e-10	0.093001	1	1	3.89525e-10	3.89525e-10	3.89525e-10	3.89525e-10	3.89525e-10	3.89525e-10	3.89525e-10	3.89525e-10	3.89525e-10	3.89525e-10	1
Direct
	Feature	MIWSC	Epistasis	Y2H	APMS1	APMS2	GC	GN	GF	b-MI	Cov	PCA 1-5	PCA 1-10	PCA 1-20	PCA 1-50	PCA 1-100	PCA 1-500	PCA 1-1000	PCA 1-5000	PCA 1-7047
	MIWSC	1	3.89525e-10	3.89525e-10	3.89525e-10	3.89525e-10	3.89525e-10	3.89525e-10	3.89525e-10	3.89525e-10	4.13947e-10	3.89437e-10	4.13853e-10	3.87419e-10	3.89173e-10	3.89261e-10	3.89261e-10	0.021321	3.89437e-10	1.83758e-09
	Epistasis	1	1	0.0142704	6.3198e-10	4.96518e-10	1.63476e-09	5.27456e-10	7.56596e-10	0.999997	1	1	1	3.88822e-10	2.32999e-08	3.89349e-10	8.33483e-05	1	6.10167e-05	0.999997
	Y2H	1	0.986098	1	5.60271e-10	4.13853e-10	1.14778e-09	4.67352e-10	2.47255e-09	1	1	1	1	3.89173e-10	4.69045e-08	3.89437e-10	0.000971851	1	0.0156719	1
	APMS1	1	1	1	1	0.00895507	0.999911	0.21998	0.997326	1	1	1	1	5.71353e-10	0.00100393	9.37524e-10	0.992896	1	0.999992	1
	APMS2	1	1	1	0.991283	1	1	0.872643	0.999998	1	1	1	1	5.70413e-10	0.00603833	6.47263e-10	0.998996	1	0.999999	1
	GC	1	1	1	9.25568e-05	1.64017e-07	1	8.16005e-05	0.103011	1	1	1	1	3.88822e-10	2.8423e-05	4.67248e-10	0.822964	1	0.995294	1
	GN	1	1	1	0.782868	0.129444	0.999922	1	0.999519	1	1	1	1	3.88383e-10	0.00147302	4.1376e-10	0.997441	1	0.999998	1
	GF	1	1	1	0.00275758	1.88277e-06	0.89871	0.000497765	1	1	1	1	1	3.88471e-10	0.000108956	4.39465e-10	0.922055	1	0.998702	1
	b-MI	1	2.98587e-06	1.83796e-09	3.89437e-10	3.89525e-10	3.89525e-10	3.89525e-10	3.89525e-10	1	0.999998	1	1	3.88558e-10	2.45702e-09	3.89261e-10	1.87327e-08	1	5.50225e-08	0.993358
	Cov	1	1.21774e-09	4.67352e-10	3.89525e-10	3.89525e-10	3.89525e-10	3.89525e-10	3.89525e-10	1.97217e-06	1	0.99869	0.996382	3.87594e-10	5.26168e-10	3.89349e-10	1.29131e-09	1	1.63476e-09	0.5
	PCA 1-5	1	5.95073e-10	3.89525e-10	3.89437e-10	3.89525e-10	3.89525e-10	3.89525e-10	3.89525e-10	1.58849e-08	0.00135377	1	0.559113	3.8637e-10	4.13481e-10	3.89173e-10	4.67039e-10	1	5.27339e-10	0.0550609
	PCA 1-10	1	3.89525e-10	4.13853e-10	3.89437e-10	3.89525e-10	3.89525e-10	3.89525e-10	3.89525e-10	5.81416e-09	0.00372731	0.444937	1	3.88207e-10	4.13481e-10	3.89437e-10	4.13947e-10	1	5.60271e-10	0.0460419
	PCA 1-20	1	1	1	1	1	1	1	1	1	1	1	1	1	0.999973	0.999998	1	1	1	1
	PCA 1-50	1	1	1	0.999028	0.994125	0.999973	0.998573	0.999895	1	1	1	1	3.18538e-05	1	0.0111283	0.999995	1	0.999999	1
	PCA 1-100	1	1	1	1	1	1	1	1	1	1	1	1	1.97301e-06	0.989323	1	1	1	1	1
	PCA 1-500	1	0.99992	0.999059	0.00729713	0.00103698	0.179554	0.00263705	0.0793616	1	1	1	1	7.78065e-10	4.76198e-06	8.37881e-10	1	1	0.895251	1
	PCA 1-1000	0.979168	3.89525e-10	3.89525e-10	3.89525e-10	3.89437e-10	3.89525e-10	3.89525e-10	3.89525e-10	3.89437e-10	7.56596e-10	8.62609e-09	1.42317e-08	3.88646e-10	3.89173e-10	3.89437e-10	3.89349e-10	1	3.89525e-10	2.1896e-09
	PCA 1-5000	1	0.999941	0.984704	8.33563e-06	6.94281e-07	0.00483946	2.26631e-06	0.00134024	1	1	1	1	3.87069e-10	6.28975e-07	4.13574e-10	0.106512	1	1	1
	PCA 1-7047	1	3.12524e-06	5.80124e-08	4.3986e-10	3.89525e-10	6.71114e-10	3.89525e-10	4.13947e-10	0.00682343	0.503851	0.946006	0.954883	3.85063e-10	9.02894e-10	3.88207e-10	8.52102e-10	1	6.5108e-09	1

## Sheet: Fig4_FigS3B Data
This spreadsheet contains the F-scores for predicting interaction types for pairs of E. coli K12 proteins in the four comprehensive benchmarks
Each element in the tables represents the F-score for predicting the interactions in the indicated benchmark for RF models trained on a single replicate of randomly partitioning the gold-standard dataset into training and validation sets.
Colormap ranges from 0 (white) to 1 (green)
Benchmark = 'STRING Nonbinding'
Interaction type = 'Indirect PPI'
Feature	Rep 1	Rep 2	Rep 3	Rep 4	Rep 5	Rep 6	Rep 7	Rep 8	Rep 9	Rep 10	Rep 11	Rep 12	Rep 13	Rep 14	Rep 15	Rep 16	Rep 17	Rep 18	Rep 19	Rep 20	Rep 21	Rep 22	Rep 23	Rep 24	Rep 25	Rep 26	Rep 27	Rep 28	Rep 29	Rep 30	Rep 31	Rep 32	Rep 33	Rep 34	Rep 35	Rep 36	Rep 37	Rep 38	Rep 39	Rep 40	Rep 41	Rep 42	Rep 43	Rep 44	Rep 45	Rep 46	Rep 47	Rep 48	Rep 49
MIWSC	0.115117	0.105128	0.110604	0.113167	0.109141	0.119215	0.106864	0.11018	0.115232	0.111221	0.100851	0.104259	0.0935961	0.104784	0.105846	0.113843	0.112935	0.107113	0.118733	0.0997833	0.104598	0.0960961	0.119945	0.113705	0.0997418	0.10117	0.112416	0.113897	0.115276	0.109016	0.102532	0.0891423	0.110965	0.100201	0.116796	0.101695	0.106785	0.11334	0.109302	0.0975988	0.10284	0.106924	0.111704	0.111647	0.0953183	0.103367	0.103927	0.107731	0.112532
Epistasis	NaN	0.000348614	NaN	NaN	0.000383951	NaN	0.000382336	NaN	NaN	0.000330469	NaN	NaN	NaN	0.000350816	NaN	0.000347887	NaN	0.000404204	NaN	NaN	NaN	NaN	NaN	NaN	0.000377715	NaN	NaN	NaN	NaN	NaN	0.000375799	NaN	NaN	NaN	NaN	0.000373343	NaN	0.000364365	0.000354421	NaN	NaN	NaN	NaN	NaN	NaN	0.000378931	NaN	0.000377929	NaN
Y2H	NaN	NaN	NaN	NaN	NaN	NaN	NaN	NaN	NaN	NaN	NaN	NaN	NaN	NaN	NaN	NaN	NaN	NaN	NaN	NaN	0.0108696	NaN	NaN	NaN	NaN	NaN	NaN	NaN	NaN	NaN	NaN	0.0114836	NaN	NaN	NaN	NaN	NaN	NaN	NaN	NaN	NaN	NaN	NaN	NaN	NaN	NaN	NaN	NaN	NaN
APMS1	0.000382044	0.000756573	0.00107759	0.00202122	0.00139567	0.00288462	0.00308907	0.000777454	0.00165262	0.00196367	0.00231596	0.000349406	0.00161655	0.00257525	0.00111732	0.0022902	0.00502438	0.00224647	0.00221379	0.00104694	0.0020968	0.00105005	0.00184502	0.00222894	0.000721761	0.000977358	0.00156961	0.000693842	0.00134116	0.00101868	0.00179727	0.00193424	0.002481	0.000689655	0.00229283	0.00138169	0.00225879	0.00104877	0.0018205	0.000381825	0.000697593	0.00208153	0.000721241	0.00258481	0.0003861	0.00137931	0.0017135	0.00292208	0.00167224
APMS2	0.000840866	0.000420256	0.000420521	0.000840336	0.000420433	0.000840866	0.000420345	NaN	0.000420345	0.000420433	0.000424268	0.000840336	NaN	0.00042008	0.000840866	0.000840689	NaN	0.000840513	0.000420256	0.000420168	NaN	0.00084317	0.000420256	0.00084016	0.00209249	NaN	NaN	0.000840336	NaN	0.00209293	0.000420256	NaN	0.000840513	0.000420345	0.000420345	0.000840513	0.000420256	0.000840336	0.000420256	0.000421852	0.000420256	0.000840866	0.000420345	0.000840336	0.000841043	0.000839983	NaN	0.000840513	0.000840513
GC	0.0316444	0.031122	0.0351626	0.0305891	0.0320564	0.0298718	0.0314953	0.0347198	0.0367783	0.0311726	0.0313397	0.0321265	0.0309571	0.0325217	0.0290878	0.0323012	0.0302168	0.031822	0.0322879	0.0284674	0.0332188	0.0313682	0.0305914	0.0319744	0.0308752	0.031692	0.0307684	0.0309305	0.0332485	0.030971	0.0314751	0.0302216	0.0317874	0.0318545	0.0282096	0.0350748	0.0322093	0.0297188	0.0330512	0.0319733	0.0313555	0.0309053	0.0320981	0.0309408	0.0319816	0.0329186	0.0325771	0.0301944	0.0329052
GN	0.0575308	0.0564585	0.0403558	0.0458643	0.0509143	0.0604167	0.0405583	0.0455892	0.0567561	0.045419	0.0517395	0.0491578	0.0507166	0.0438961	0.045531	0.0584862	0.0382357	0.0504536	0.0509996	0.0569153	0.0638155	0.046979	0.0509035	0.0462503	0.0441489	0.0557304	0.0481384	0.0535191	0.0507713	0.0417633	0.0526442	0.0492063	0.0565134	0.0549188	0.0471991	0.0479979	0.0512	0.0510772	0.0594296	0.0501784	0.060734	0.0594153	0.0446116	0.0484153	0.053047	0.0527698	0.0493109	0.053462	0.0503651
GF	0.0497613	0.0493893	0.0490781	0.0484045	0.0484765	0.048112	0.0476966	0.0488888	0.0518286	0.0458405	0.0514017	0.0485944	0.0501999	0.0547145	0.0489343	0.0504461	0.0513027	0.0501415	0.0498603	0.0495006	0.0491667	0.0486789	0.0508561	0.049605	0.049169	0.0507859	0.0502662	0.0496918	0.0501188	0.0476665	0.0512836	0.0517957	0.0489367	0.0529607	0.0496572	0.05149	0.0489302	0.0463185	0.0505217	0.0542778	0.0505988	0.0517386	0.0504492	0.0528926	0.0478158	0.0502685	0.049852	0.0515128	0.0530127
Benchmark = 'STRING'
Interaction type = 'Indirect PPI or direct PPI'
Feature	Rep 1	Rep 2	Rep 3	Rep 4	Rep 5	Rep 6	Rep 7	Rep 8	Rep 9	Rep 10	Rep 11	Rep 12	Rep 13	Rep 14	Rep 15	Rep 16	Rep 17	Rep 18	Rep 19	Rep 20	Rep 21	Rep 22	Rep 23	Rep 24	Rep 25	Rep 26	Rep 27	Rep 28	Rep 29	Rep 30	Rep 31	Rep 32	Rep 33	Rep 34	Rep 35	Rep 36	Rep 37	Rep 38	Rep 39	Rep 40	Rep 41	Rep 42	Rep 43	Rep 44	Rep 45	Rep 46	Rep 47	Rep 48	Rep 49
MIWSC	0.14455	0.132926	0.147794	0.14174	0.141494	0.14428	0.138216	0.137453	0.141289	0.134933	0.137081	0.138758	0.135487	0.136877	0.139801	0.13743	0.139984	0.138045	0.148917	0.139305	0.141152	0.136234	0.139252	0.137121	0.13703	0.138581	0.139512	0.137915	0.141402	0.141874	0.136048	0.133207	0.136688	0.136463	0.140757	0.141821	0.137558	0.135339	0.144219	0.134181	0.123952	0.142459	0.139417	0.142013	0.134532	0.139021	0.136184	0.141465	0.144206
Epistasis	0.00020003	0.00039032	0.000391389	0.000202614	0.000500751	NaN	0.0004002	0.000401889	0.000296809	0.000480469	0.000199164	0.000572355	0.00019973	0.000782052	0.000297826	0.000487615	0.000202603	0.000202994	NaN	0.000100311	0.000295276	0.000102036	0.000201623	0.000385097	0.000398983	NaN	0.000101559	0.000100271	0.000300375	0.000198847	0.000398387	0.000295406	0.000203097	NaN	0.000101363	0.00029827	0.000100296	0.00029634	0.000490172	NaN	NaN	9.83091e-05	0.000301114	0.000101446	0.000294233	0.000199651	NaN	0.000399002	9.997e-05
Y2H	NaN	NaN	NaN	0.0203764	0.0201915	NaN	NaN	NaN	NaN	0.0200953	NaN	NaN	0.0203774	0.0205641	0.0207498	NaN	0.0203764	NaN	NaN	NaN	0.0200953	NaN	NaN	0.0203726	0.0203754	NaN	NaN	0.0202821	0.0200028	0.0204678	0.019816	0.0207498	0.0202811	0.0203735	NaN	NaN	NaN	0.0207469	NaN	0.0205622	NaN	NaN	0.0202821	0.0201896	0.0203764	0.020283	0.0202821	NaN	NaN
APMS1	0.0100276	0.00783619	0.00914275	0.0127004	0.00976144	0.0160331	0.0145234	0.00719217	0.0190005	0.0111679	0.0107658	0.00756574	0.0135316	0.0178124	0.0100831	0.0122753	0.0181266	0.0157048	0.0120221	0.0150329	0.00973064	0.00517871	0.0110729	0.012067	0.00524394	0.0108844	0.0127277	0.00971573	0.0161464	0.00933405	0.0138669	0.0182358	0.0105536	0.00648809	0.0165526	0.00627108	0.0133956	0.00951703	0.00999312	0.00500993	0.0108338	0.0101987	0.0130105	0.0173022	0.0128223	0.0129911	0.0101953	0.0114731	0.00983607
APMS2	0.0136269	0.0176381	0.0164392	0.0163352	0.0171356	0.0172414	0.0175385	0.0149466	0.0171365	0.0174371	0.013932	0.0126164	0.0145451	0.0175376	0.017438	0.0174389	0.0163385	0.017438	0.0143293	0.0159383	0.0146304	0.0143264	0.0173375	0.00898005	0.0157384	0.0148502	0.0155496	0.0173375	0.0160431	0.01684	0.0145318	0.0158512	0.017438	0.0142298	0.0173366	0.0168425	0.0173375	0.0177395	0.0159399	0.0154346	0.0175385	0.017639	0.0165356	0.0174389	0.017639	0.0175385	0.0156496	0.0166354	0.0164359
GC	0.0819809	0.0824866	0.087826	0.0779674	0.0832599	0.0778263	0.0790681	0.0859155	0.088512	0.0792771	0.0818414	0.0828044	0.0810519	0.0834031	0.0794286	0.0811781	0.0789996	0.0837089	0.0848913	0.0778063	0.0849085	0.0801092	0.0815136	0.0821085	0.0796893	0.0803159	0.0799815	0.0793392	0.0837848	0.0814007	0.0783963	0.0795988	0.0832052	0.0807208	0.0765237	0.0839664	0.082724	0.0757368	0.0829131	0.0814981	0.08087	0.0832898	0.0819211	0.0803047	0.080228	0.0846204	0.0834208	0.078138	0.0839597
GN	0.112304	0.107832	0.0985886	0.0904449	0.112584	0.114159	0.0932795	0.0862698	0.106056	0.0931948	0.0953834	0.103296	0.104597	0.0987748	0.114461	0.110601	0.0862725	0.097598	0.107155	0.111207	0.121067	0.105232	0.101023	0.0910918	0.105131	0.120557	0.0961716	0.117967	0.110956	0.0876717	0.103692	0.0939234	0.107287	0.105906	0.094262	0.0947085	0.115525	0.0985886	0.120089	0.0988151	0.110723	0.119108	0.096835	0.0986607	0.107622	0.104699	0.0963674	0.115721	0.1019
GF	0.128071	0.123869	0.121048	0.1349	0.13104	0.13042	0.127638	0.12452	0.124254	0.132701	0.13542	0.128741	0.120439	0.123026	0.131398	0.129052	0.126654	0.119568	0.125782	0.131114	0.128163	0.132091	0.125531	0.136938	0.131641	0.129135	0.128004	0.128123	0.128258	0.128896	0.129097	0.134042	0.131805	0.132295	0.125461	0.126397	0.129837	0.132972	0.126739	0.124193	0.132259	0.130242	0.127422	0.130083	0.12821	0.127436	0.126808	0.129375	0.129192
Benchmark = 'GO
Interaction type = 'Indirect PPI or direct PPI'
Feature	Rep 1	Rep 2	Rep 3	Rep 4	Rep 5	Rep 6	Rep 7	Rep 8	Rep 9	Rep 10	Rep 11	Rep 12	Rep 13	Rep 14	Rep 15	Rep 16	Rep 17	Rep 18	Rep 19	Rep 20	Rep 21	Rep 22	Rep 23	Rep 24	Rep 25	Rep 26	Rep 27	Rep 28	Rep 29	Rep 30	Rep 31	Rep 32	Rep 33	Rep 34	Rep 35	Rep 36	Rep 37	Rep 38	Rep 39	Rep 40	Rep 41	Rep 42	Rep 43	Rep 44	Rep 45	Rep 46	Rep 47	Rep 48	Rep 49
MIWSC	0.0984176	0.0991395	0.101283	0.10251	0.0996035	0.10118	0.100606	0.0997324	0.10069	0.100032	0.0977153	0.101912	0.100599	0.102006	0.101347	0.0977129	0.099643	0.102008	0.101953	0.103512	0.102053	0.104372	0.0972289	0.0970951	0.0983511	0.100153	0.101027	0.0992606	0.100457	0.102564	0.100051	0.103693	0.0987654	0.100961	0.10047	0.0631302	0.107877	0.0961218	0.102463	0.0954545	0.0940905	0.105287	0.096252	0.100053	0.0988434	0.0993651	0.10046	0.102766	0.103753
Epistasis	0.000100527	0.000199798	0.000324894	0.000100851	0.000201121	7.55991e-05	0.000201076	0.000100638	0.000175432	0.000298511	0.000200836	0.000372426	7.53655e-05	0.000299831	0.000225768	0.000274688	7.56372e-05	7.56716e-05	NaN	0.000150902	0.000125149	2.52573e-05	7.55439e-05	0.000174212	0.000125568	NaN	5.04566e-05	0.000150888	0.000100552	0.000175652	0.000175734	0.00022529	7.5684e-05	5.04477e-05	5.04312e-05	0.000125467	0.000150892	0.000225473	0.000225034	2.52685e-05	0.00010052	0.000250222	0.000150923	5.04414e-05	0.00030009	0.000125598	0.000300631	0.000150693	0.000175904
Y2H	NaN	NaN	NaN	0.00311943	0.00307003	NaN	NaN	NaN	NaN	0.00309463	NaN	NaN	0.00314415	0.00319354	0.00321834	NaN	0.00311943	NaN	NaN	NaN	0.00306991	NaN	NaN	0.00316859	0.0031935	NaN	NaN	0.00311943	0.00309471	0.00319343	0.00299579	0.00321818	0.00309467	0.00316863	NaN	NaN	NaN	0.0032181	NaN	0.00316887	NaN	NaN	0.00314411	0.00311943	0.00314415	0.00311943	0.00311931	NaN	NaN
APMS1	0.00281742	0.0027893	0.00357493	0.0044651	0.0037052	0.00497669	0.00449553	0.0023122	0.00563892	0.00428115	0.00378025	0.00267393	0.00463824	0.00556573	0.00409319	0.00444212	0.00588136	0.00516314	0.00406296	0.00444977	0.00323625	0.00243809	0.00389743	0.00435698	0.00210019	0.0041521	0.00441078	0.00354458	0.0046164	0.00342001	0.00434608	0.00608426	0.00392951	0.00258729	0.00510507	0.00220748	0.00495868	0.00370411	0.00314489	0.00188259	0.00433099	0.00360374	0.00389129	0.00598896	0.00406079	0.00385079	0.0038653	0.00388302	0.00343377
APMS2	0.0011861	0.00153817	0.00141245	0.00131156	0.00143742	0.00148795	0.00151305	0.00133742	0.00143736	0.00151297	0.00126183	0.00113573	0.00133757	0.00153817	0.00151307	0.00151307	0.00141252	0.00151301	0.00118596	0.0013874	0.00128674	0.001312	0.00148781	0.0007577	0.00138742	0.00128713	0.0013121	0.00148785	0.00141266	0.0015132	0.00126157	0.00138768	0.00148785	0.00121113	0.0014878	0.00151328	0.0014878	0.0015886	0.00136216	0.00126138	0.00151301	0.00153819	0.00143758	0.00151303	0.00153821	0.00151301	0.00136248	0.00141238	0.00131154
GC	0.0549525	0.0538821	0.0545916	0.0532454	0.0564792	0.0510732	0.0556933	0.0567863	0.0540788	0.0522085	0.0565765	0.0542005	0.0549804	0.0552336	0.0563549	0.0544056	0.0533926	0.0550235	0.0553162	0.0563718	0.0566811	0.0543786	0.0564279	0.054086	0.0548125	0.0561432	0.0543285	0.052463	0.0547161	0.0561687	0.0522627	0.0541546	0.0561619	0.0552115	0.0567609	0.0537773	0.0561735	0.0554098	0.0546857	0.0537567	0.0527601	0.0543821	0.0531838	0.0540663	0.0526426	0.0564731	0.0567488	0.0546292	0.0536263
GN	0.0245269	0.0225599	0.0221073	0.0202196	0.0267758	0.0249372	0.0227207	0.0210892	0.0231729	0.0229407	0.0223633	0.0249386	0.0246914	0.0217162	0.0243118	0.0247158	0.0212838	0.0216634	0.0238535	0.0253496	0.0250113	0.0217363	0.0231576	0.0205855	0.0220889	0.0266215	0.0228426	0.0255716	0.0246584	0.0206738	0.0243518	0.0186144	0.0241433	0.0245241	0.0235757	0.0232112	0.0245538	0.0228517	0.026508	0.0236986	0.0236239	0.0246224	0.0225312	0.0230445	0.0211824	0.0215907	0.0235582	0.0236805	0.0231092
GF	0.0683579	0.0627644	0.0618598	0.0719675	0.069449	0.0695105	0.0693298	0.0670642	0.0643165	0.072898	0.0705975	0.0688587	0.0621361	0.0599359	0.0711896	0.0675516	0.0645407	0.0573742	0.0641826	0.0696725	0.0683071	0.0694494	0.0641946	0.071877	0.0706088	0.0657981	0.0671845	0.0670545	0.0667767	0.0703892	0.0673619	0.0689014	0.0696425	0.0670777	0.0666444	0.0631279	0.0701274	0.0733349	0.0621495	0.0626602	0.0702618	0.0662231	0.0666137	0.064531	0.0696952	0.0651114	0.0687541	0.0685791	0.0672613
Benchmark = 'PDB'
Interaction type = 'Indirect PPI or direct PPI'
Feature	Rep 1	Rep 2	Rep 3	Rep 4	Rep 5	Rep 6	Rep 7	Rep 8	Rep 9	Rep 10	Rep 11	Rep 12	Rep 13	Rep 14	Rep 15	Rep 16	Rep 17	Rep 18	Rep 19	Rep 20	Rep 21	Rep 22	Rep 23	Rep 24	Rep 25	Rep 26	Rep 27	Rep 28	Rep 29	Rep 30	Rep 31	Rep 32	Rep 33	Rep 34	Rep 35	Rep 36	Rep 37	Rep 38	Rep 39	Rep 40	Rep 41	Rep 42	Rep 43	Rep 44	Rep 45	Rep 46	Rep 47	Rep 48	Rep 49
MIWSC	0.0852267	0.0836962	0.0859452	0.0840215	0.0859641	0.0855312	0.0865329	0.0874139	0.0904643	0.0917638	0.0842437	0.0860903	0.0866951	0.0819193	0.0829365	0.0875301	0.0896536	0.0895769	0.0837599	0.0896598	0.0865248	0.085568	0.0878061	0.0839851	0.0833742	0.0833233	0.0868502	0.0847374	0.0862888	0.0834123	0.0849497	0.0837085	0.0890798	0.0866608	0.0887582	0.0457571	0.0880409	0.0871838	0.0853234	0.08555	0.0890763	0.0805279	0.0842181	0.0840377	0.0826111	0.0818151	0.0840734	0.0851323	0.0848109
Epistasis	NaN	NaN	NaN	NaN	NaN	NaN	NaN	NaN	NaN	NaN	NaN	NaN	NaN	NaN	NaN	NaN	NaN	NaN	NaN	NaN	NaN	NaN	NaN	NaN	NaN	NaN	NaN	NaN	NaN	NaN	NaN	NaN	NaN	NaN	NaN	NaN	NaN	NaN	NaN	NaN	NaN	NaN	NaN	NaN	NaN	NaN	NaN	NaN	NaN
Y2H	NaN	NaN	NaN	0.0294118	0.0294586	NaN	NaN	NaN	NaN	0.0278441	NaN	NaN	0.0302187	0.0294001	0.0309524	NaN	0.0286169	NaN	NaN	NaN	NaN	NaN	NaN	0.0301468	0.0301827	NaN	NaN	0.0294118	0.0278552	0.0309524	0.0278884	NaN	0.0286055	0.0293651	NaN	NaN	NaN	0.0317083	NaN	0.0309524	NaN	NaN	0.0278219	0.0294235	0.0301947	0.0294235	0.0294118	NaN	NaN
APMS1	0.0104019	0.00740056	0.00631662	0.00412655	0.00454752	0.00807809	0.00826162	0.00232423	0.0132846	0.00400133	0.00601504	0.0044843	0.00395909	0.0112045	0.00602637	0.00664943	0.00759301	0.00887902	0.00519256	0.0080032	0.00345304	0.00415584	0.00767386	0.00361272	0.00437397	0.00301205	0.00852383	0.00322841	0.0111016	0.00498753	0.00803958	0.00880411	0.00520021	0.00447427	0.0134183	0.00630418	0.00558436	0.00432277	0.00342906	0.00207254	0.00357995	0.00357526	0.0115429	0.0117801	0.0111554	0.00595017	0.00512821	0.00277264	0.00703518
APMS2	0.0565832	0.0672783	0.0583333	0.0519211	0.057377	0.063786	0.0653061	0.0670051	0.057377	0.0633299	0.0643154	0.0527473	0.0674847	0.0653728	0.0613497	0.0613497	0.0593654	0.0612245	0.0537057	0.0650577	0.0479666	0.052521	0.0613497	0.0188457	0.0515575	0.0593047	0.0603015	0.0593654	0.0613497	0.052687	0.0493562	0.0661323	0.0613497	0.0538213	0.0613497	0.0643821	0.0613497	0.0672783	0.0588854	0.0559585	0.0653728	0.0651731	0.0600414	0.0613497	0.0651731	0.0633947	0.062249	0.0619195	0.0539419
GC	0.0844687	0.0738916	0.0682444	0.0697051	0.0723775	0.0686275	0.0667859	0.0612245	0.0649422	0.0894533	0.0615977	0.0702765	0.0811688	0.0624025	0.0835763	0.0725571	0.0970874	0.0848612	0.0720721	0.0798687	0.0739599	0.0646831	0.0737444	0.0633977	0.0739008	0.0662651	0.0856672	0.0758952	0.0869074	0.0674394	0.0711638	0.0682594	0.0760171	0.0789058	0.0686937	0.068343	0.0609626	0.0632689	0.0718884	0.0831266	0.0809319	0.0633437	0.0754378	0.0690104	0.0583554	0.0787103	0.0731238	0.0728254	0.073197
GN	0.0288089	0.0239589	0.0217293	0.0236753	0.0184332	0.0307517	0.0291705	0.0220207	0.0220588	0.0248576	0.0273816	0.0156726	0.0168484	0.0181726	0.0238184	0.0293772	0.0192493	0.0302297	0.0291515	0.0240334	0.0225352	0.0176899	0.0209424	0.0298851	0.0192711	0.0261497	0.0310593	0.0201776	0.0194363	0.024109	0.0287693	0.0293945	0.0275387	0.0255048	0.0249433	0.024565	0.0210619	0.0215633	0.0282958	0.0256237	0.0298507	0.0300893	0.0195077	0.0286186	0.0174165	0.0264131	0.0203355	0.0243453	0.0240209
GF	0.0235018	0.027845	0.0414587	0.0457867	0.0356255	0.0457948	0.0465357	0.0295567	0.0322165	0.0491029	0.0433379	0.0411585	0.0391993	0.0358056	0.0462321	0.0261337	0.0380642	0.0448478	0.0217289	0.0202501	0.0273082	0.041206	0.0195402	0.04426	0.0420684	0.04	0.0368509	0.0244044	0.0402397	0.0249554	0.0231959	0.0303222	0.0407456	0.0414343	0.0437887	0.0324324	0.0360078	0.0429769	0.040678	0.0248834	0.0417573	0.0416848	0.0443439	0.035933	0.030934	0.0423143	0.0393208	0.0217617	0.0270463
[truncated: 4 more columns]

## Sheet: Fig4_FigS3B Statistics
Each element contains the p-value for the statistical comparison of the median F-score for model trained on the feature listed in the row versus column using a one-sided Wilcoxon Rank Sum test
A significant p-value supports the hypothesis that the models trained on the feature in the row have a greater F-score for predicting the indicated interaction type compared to models trained on the feature listed in the column
Benchmark = 'STRING Nonbinding'
Interaction type = 'Indirect PPI'
Feature	MIWSC	Epistasis	Y2H	APMS1	APMS2	GC	GN	GF
MIWSC	1	3.89525e-10	3.89525e-10	3.89525e-10	3.89525e-10	3.89525e-10	3.89525e-10	3.89525e-10
Epistasis	1	1	0.0295553	1	1	1	1	1
Y2H	1	0.973754	1	1	0.999998	1	1	1
APMS1	1	3.89525e-10	1.03208e-07	1	4.44863e-08	1	1	1
APMS2	1	1.82748e-08	2.04192e-06	1	1	1	1	1
GC	1	3.89525e-10	3.89525e-10	3.89525e-10	3.89525e-10	1	1	1
GN	1	3.89525e-10	3.89525e-10	3.89525e-10	3.89525e-10	3.89525e-10	1	0.172069
GF	1	3.89525e-10	3.89525e-10	3.89525e-10	3.89525e-10	3.89525e-10	0.830382	1
Benchmark = 'STRING'
Interaction type = 'Indirect PPI or direct PPI'
Feature	MIWSC	Epistasis	Y2H	APMS1	APMS2	GC	GN	GF
MIWSC	1	3.89525e-10	3.89525e-10	3.89525e-10	3.89525e-10	3.89525e-10	3.89525e-10	1.08173e-09
Epistasis	1	1	0.999647	1	1	1	1	1
Y2H	1	0.000367819	1	0.906999	0.998742	1	1	1
APMS1	1	3.89525e-10	0.0946174	1	1	1	1	1
APMS2	1	3.89525e-10	0.00129827	9.12288e-09	1	1	1	1
GC	1	3.89525e-10	3.89525e-10	3.89525e-10	3.89525e-10	1	1	1
GN	1	3.89525e-10	3.89525e-10	3.89525e-10	3.89525e-10	3.89525e-10	1	1
GF	1	3.89525e-10	3.89525e-10	3.89525e-10	3.89525e-10	3.89525e-10	3.89525e-10	1
Benchmark = 'GO
Interaction type = 'Indirect PPI or direct PPI'
Feature	MIWSC	Epistasis	Y2H	APMS1	APMS2	GC	GN	GF
MIWSC	1	3.89525e-10	3.89525e-10	3.89525e-10	3.89525e-10	3.89525e-10	3.89525e-10	3.89525e-10
Epistasis	1	1	0.999325	1	1	1	1	1
Y2H	1	0.000699363	1	1	0.00129827	1	1	1
APMS1	1	3.89525e-10	3.28385e-09	1	3.89525e-10	1	1	1
APMS2	1	3.89525e-10	0.998742	1	1	1	1	1
GC	1	3.89525e-10	3.89525e-10	3.89525e-10	3.89525e-10	1	3.89525e-10	1
GN	1	3.89525e-10	3.89525e-10	3.89525e-10	3.89525e-10	1	1	1
GF	1	3.89525e-10	3.89525e-10	3.89525e-10	3.89525e-10	3.89525e-10	3.89525e-10	1
Benchmark = 'PDB'
Interaction type = 'Direct PPI'
Feature	MIWSC	Epistasis	Y2H	APMS1	APMS2	GC	GN	GF
MIWSC	1	3.89525e-10	3.89525e-10	3.89525e-10	5.95073e-10	1.14027e-08	3.89525e-10	3.89525e-10
Epistasis	1	1	0.999987	1	1	1	1	1
Y2H	1	1.43065e-05	1	0.00620617	1	1	0.999787	1
APMS1	1	3.89525e-10	0.993961	1	1	1	1	1
APMS2	1	3.7867e-10	4.13016e-10	3.89525e-10	1	1	4.13947e-10	2.32075e-09
GC	1	3.89525e-10	3.89525e-10	3.89525e-10	5.49356e-09	1	3.89525e-10	3.89525e-10
GN	1	3.89525e-10	0.000220878	3.89525e-10	1	1	1	1
GF	1	3.89525e-10	1.14778e-09	3.89525e-10	1	1	2.09013e-08	1

## Sheet: Fig_4B and 4C data
Precision and recall for PPI predictions across 12 diverse organisms using RF models trained on MIWSCs, Gene Cooccurence (GC), Gene Fusion (GF, or Gene Neighborhoods (GN)
Organism	Strain
Aliivibrio fischeri	Aliivibrio fischeri (strain ATCC 700601 / ES114)
Azotobacter vinelandii	Azotobacter vinelandii (strain DJ / ATCC BAA-1303)
Bacillus subtilis	Bacillus subtilis (strain 168)
Caulobacter crescentus	Caulobacter vibrioides (strain ATCC 19089 / CB15)
Escherichia coli	Escherichia coli (strain K12) (Strain: K12 / MG1655 / ATCC 47076)
Helicobacter pylori	Helicobacter pylori (strain ATCC 700392 / 26695) (Campylobacter pylori)
Mycobacterium tuberculosis	Mycobacterium tuberculosis (strain ATCC 25618 / H37Rv)
Mycoplasma genitalium	Mycoplasma genitalium (strain ATCC 33530 / G-37 / NCTC 10195)
Pseudomonas fluorescens	Pseudomonas fluorescens (strain F113)
Staphylococcus aureus	Staphylococcus aureus (strain NCTC 8325)
Streptomyces coelicolor	Streptomyces coelicolor (strain ATCC BAA-471 / A3(2) / M145)
Synechocystis sp.	Synechocystis sp. (strain PCC 6803 / Kazusa)
Precision
Method	PPI Class	Cutoff	Stringency	Aliivibrio fischeri	Azotobacter vinelandii	Bacillus subtilis	Caulobacter crescentus	Escherichia coli	Helicobacter pylori	Mycobacterium tuberculosis	Mycoplasma genitalium	Pseudomonas fluorescens	Staphylococcus aureus	Streptomyces coelicolor	Synechocystis sp.	Median	25th percentile	75th percentile
MIWSC	Any (indirect or direct)	NA	NA	0.393922	0.243815	0.219788	0.326108	0.198307	0.432653	0.697305	0.167438	0.35138	0.243815	0.139143	0.0971561	0.2438	0.1829	0.3727
MIWSC	Indirect	NA	NA	0.370278	0.205343	0.194202	0.313111	0.17449	0.413531	0.693352	0.156789	0.321553	0.205343	0.0850062	0.0897962	0.2053	0.1656	0.3459
MIWSC	Direct	NA	NA	0.6388	0.523001	0.521785	0.518828	0.424309	0.806452	0.8125	0.493612	0.607915	0.523001	0.664613	0.40747	0.523	0.5062	0.6517
GC	Any (indirect or direct)	Low	150	0.066662	0.0584823	0.0470981	0.0703766	0.0667328	0.163788	0.231114	0.0362629	0.0991594	0.066662	0.0458014	0.0545384	0.066662	0.0508183	0.084768
GC	Any (indirect or direct)	Medium	400	0.151752	0.141727	0.119814	0.16818	0.171337	0.325648	0.35625	0.056209	0.257074	0.151752	0.157078	0.0847013	0.154415	0.13077	0.214206
GC	Any (indirect or direct)	High	700	0.226308	0.256829	0.22925	0.288837	0.300774	0.399621	0.588235	0.129321	0.331731	0.226308	0.244656	0.162726	0.250743	0.226308	0.316253
GC	Any (indirect or direct)	Highest	900	NaN	NaN	NaN	NaN	NaN	NaN	NaN	NaN	NaN	NaN	NaN	NaN	NaN	NaN	NaN
GF	Any (indirect or direct)	Low	150	0.28536	0.259838	0.2567	0.275093	0.250311	0.425993	0.521739	0.264591	0.309007	0.28536	0.215648	0.308436	0.280226	0.258269	0.308722
GF	Any (indirect or direct)	Medium	400	0.291152	0.262004	0.280142	0.309423	0.270186	0.437158	0.604651	0.289474	0.309342	0.291152	0.251046	0.309951	0.291152	0.275164	0.309687
GF	Any (indirect or direct)	High	700	0.33871	0.293774	0.305747	0.326923	0.301685	0.491525	0.774194	0.32493	0.362989	0.33871	0.328502	0.356923	0.333606	0.315339	0.359956
GF	Any (indirect or direct)	Highest	900	0.352941	0.384615	0.538462	0.411765	0.5	0.571429	1	0.428571	0.5	0.352941	0.444444	0.333333	0.436508	0.368778	0.519231
GN	Any (indirect or direct)	Low	150	0.115499	0.106187	0.0983745	0.101528	0.108755	0.108073	0.164793	0.0987692	0.0855878	0.115499	0.0942148	0.118435	0.10713	0.0985719	0.115499
GN	Any (indirect or direct)	Medium	400	0.171457	0.15	0.124992	0.126782	0.205521	0.1549	0.212585	0.110343	0.152174	0.171457	0.117389	0.151889	0.152032	0.125887	0.171457
GN	Any (indirect or direct)	High	700	0.224649	0.2182	0.181283	0.224481	0.298412	0.227723	0.346076	0.186534	0.224089	0.224649	0.217623	0.206367	0.224285	0.211995	0.226186
GN	Any (indirect or direct)	Highest	900	0.607143	NaN	0.329466	NaN	0.392857	0.103448	0.699029	NaN	0.354839	0.607143	0.263158	NaN	0.373848	0.296312	0.607143
RECALL
Method	PPI Class	Cutoff	Stringency	Aliivibrio fischeri	Azotobacter vinelandii	Bacillus subtilis	Caulobacter crescentus	Escherichia coli	Helicobacter pylori	Mycobacterium tuberculosis	Mycoplasma genitalium	Pseudomonas fluorescens	Staphylococcus aureus	Streptomyces coelicolor	Synechocystis sp.	Median	25th percentile	75th percentile
MIWSC	Any (indirect or direct)	NA	NA	0.0569084	0.0327813	0.0381974	0.045435	0.0442984	0.0790772	0.137074	0.0264457	0.0325669	0.0327813	0.0416399	0.0420147	0.0418	0.0328	0.0512
MIWSC	Indirect	NA	NA	0.0487825	0.024265	0.0311148	0.0408682	0.035262	0.0719041	0.131776	0.0239809	0.0266982	0.024265	0.0230628	0.0379323	0.0332	0.0243	0.0448
MIWSC	Direct	NA	NA	0.00812587	0.00851637	0.00708268	0.00456683	0.00903638	0.00717319	0.00529819	0.00246478	0.00586872	0.00851637	0.0185771	0.0040824	0.0071	0.0049	0.0085
GC	Any (indirect or direct)	Low	150	0.178184	0.190644	0.185693	0.181568	0.298772	0.149518	0.041978	0.0733171	0.0819919	0.178184	0.189504	0.234653	0.179876	0.115755	0.190074
GC	Any (indirect or direct)	Medium	400	0.0332986	0.0361438	0.036077	0.0275114	0.0552289	0.0380386	0.00774351	0.0111408	0.0195998	0.0332986	0.0307292	0.0384426	0.0332986	0.0235556	0.0370912
GC	Any (indirect or direct)	High	700	0.0131179	0.0149974	0.0123911	0.00762365	0.018248	0.011838	0.00407553	0.00410024	0.00686717	0.0131179	0.00871311	0.0108864	0.0113622	0.00724541	0.0131179
GC	Any (indirect or direct)	Highest	900	0	0	0	0	0	0	0	0	0	0	0	0	0	0	0
GF	Any (indirect or direct)	Low	150	0.00512766	0.00612167	0.00621718	0.00454227	0.00915429	0.00662029	0.00489064	0.00197183	0.00150892	0.00512766	0.00199817	0.0059705	0.00512766	0.00327022	0.00616943
GF	Any (indirect or direct)	Medium	400	0.0025237	0.00342214	0.00341873	0.00270081	0.00527433	0.00448833	0.00353213	0.0010845	0.000648513	0.0025237	0.00108744	0.0032319	0.00296635	0.00180557	0.00347713
GF	Any (indirect or direct)	High	700	0.00149817	0.00205874	0.00191853	0.00146089	0.00298575	0.00325404	0.00326043	0.000672741	0.000327467	0.00149817	0.000616216	0.00197316	0.00170835	0.00106682	0.00252224
GF	Any (indirect or direct)	Highest	900	5.3506e-05	6.817e-05	0.000100975	8.59349e-05	9.09366e-05	0.000224417	0.000271702	3.47969e-05	9.63138e-06	5.3506e-05	1.8124e-05	0.00010206	7.70525e-05	4.41515e-05	0.000101518
GN	Any (indirect or direct)	Low	150	0.049609	0.0457012	0.0586666	0.0468959	0.074856	0.145254	0.241	0.0205708	0.0445772	0.049609	0.0205798	0.0756774	0.049609	0.0451392	0.0752667
GN	Any (indirect or direct)	Medium	400	0.0201093	0.0167289	0.0270325	0.0112452	0.029903	0.0488667	0.183127	0.00509195	0.00752852	0.0201093	0.00765285	0.0104611	0.0184191	0.009057	0.0284677
GN	Any (indirect or direct)	High	700	0.00770486	0.00895754	0.00978016	0.00677658	0.0148075	0.0296791	0.0700992	0.00314912	0.0030403	0.00770486	0.00388306	0.00319788	0.00770486	0.00354047	0.0122938
GN	Any (indirect or direct)	Highest	900	0.0001516	0	0.00204835	0	0.000166717	0.000168312	0.0391251	0	7.06301e-05	0.0001516	2.2655e-05	0	0.000111115	0	0.000167515
