# Supplementary material for: Defining hierarchical protein interaction networks from spectral analysis of bacterial proteomes
Source: eLife. 2022 Aug 17;11:e74104. doi: 10.7554/eLife.74104 (PMC9427106; doi:10.7554/eLife.74104)
Supplement: Supplementary file 1. [file elife-74104-supp1.xlsx]

## Sheet: Overview
Supplementary File 1: Data pertaining to Figure 6A.
Tab	Contents
Spectral Depth Table	Hierarchically clustered spectral depth matrix for E. coli K12 proteins coevolving with FliC
Metadata	Protein accession, module designations, BRITE categories, literature references, and other associated metadata
Module_designations	Accessions of proteins assigned to each module in the statistical hierarchy
SDX	Adjacency matrix generated by thresholding the hierarchically clustered spectral depth matrix to spectral depth 'X'
David_Output_SDX	Output table for gene set enrichment analysis of the sets of proteins within each statistical module observed at a spectral depth of 'X' using David v6.8

## Sheet: Spectral Depth Table
Node Label	Uniprot ID	PdeN	PdeF	PdeD	YdiV	PdeI	PdeH	BluF	PdeG	CsrD	PdeA	PdeK	DosC	DgcC	DgcQ	DgcM	DgcT	DgcZ	Tsr	Aer	Trg	Tar	Tap	CheB	CheR	CheW	CheA	ArcB	EvgS	TorS	RcsD	BasS	QseC	FdhF	YdhV	PpdC	PpdD	CsgG	RfaI	RfaJ	CheZ	FliD	YcgR	FliC	FlgL	FliL	FliS	FlgK	FliK
PdeN	P76446	3000	3000	3000	3000	3000	3000	3000	3000	3000	3000	3000	372	372	372	372	372	372	93	93	93	93	93	57	51	72	73	53	54	51	100	51	51	51	51	51	51	51	51	51	53	51	59	92	92	86	86	84	76
PdeF	P77172	3000	3000	3000	3000	3000	3000	3000	3000	3000	3000	3000	372	372	372	372	372	372	93	93	93	93	93	57	51	72	73	53	54	51	100	51	51	51	51	51	51	51	51	51	53	51	59	92	92	86	86	84	76
PdeD	P76261	3000	3000	3000	3000	3000	3000	3000	3000	3000	3000	3000	372	372	372	372	372	372	93	93	93	93	93	57	51	72	73	53	54	51	100	51	51	51	51	51	51	51	51	51	53	51	59	92	92	86	86	84	76
YdiV	P76204	3000	3000	3000	3000	3000	3000	3000	3000	3000	3000	3000	372	372	372	372	372	372	93	93	93	93	93	57	51	72	73	53	54	51	100	51	51	51	51	51	51	51	51	51	53	51	59	92	92	86	86	84	76
PdeI	P75800	3000	3000	3000	3000	3000	3000	3000	3000	3000	3000	3000	372	372	372	372	372	372	93	93	93	93	93	57	51	72	73	53	54	51	100	51	51	51	51	51	51	51	51	51	53	51	59	92	92	86	86	84	76
PdeH	P37646	3000	3000	3000	3000	3000	3000	3000	3000	3000	3000	3000	372	372	372	372	372	372	93	93	93	93	93	57	51	72	73	53	54	51	100	51	51	51	51	51	51	51	51	51	53	51	59	92	92	86	86	84	76
BluF	P75990	3000	3000	3000	3000	3000	3000	3000	3000	3000	3000	3000	372	372	372	372	372	372	93	93	93	93	93	57	51	72	73	53	54	51	100	51	51	51	51	51	51	51	51	51	53	51	59	92	92	86	86	84	76
PdeG	P75995	3000	3000	3000	3000	3000	3000	3000	3000	3000	3000	3000	372	372	372	372	372	372	93	93	93	93	93	57	51	72	73	53	54	51	100	51	51	51	51	51	51	51	51	51	53	51	59	92	92	86	86	84	76
CsrD	P13518	3000	3000	3000	3000	3000	3000	3000	3000	3000	3000	3000	371	371	371	371	371	371	94	94	94	94	94	59	51	74	74	56	58	54	100	51	51	51	51	51	51	51	51	51	51	51	72	85	85	80	84	76	63
PdeA	P23842	3000	3000	3000	3000	3000	3000	3000	3000	3000	3000	3000	371	371	371	371	371	371	94	94	94	94	94	59	51	74	74	56	58	54	100	51	51	51	51	51	51	51	51	51	51	51	72	85	85	80	84	76	63
PdeK	P37649	3000	3000	3000	3000	3000	3000	3000	3000	3000	3000	3000	371	371	371	371	371	371	94	94	94	94	94	59	51	74	74	56	58	54	100	51	51	51	51	51	51	51	51	51	51	51	72	85	85	80	84	76	63
DosC	P0AA89	372	372	372	372	372	372	372	372	371	371	371	3000	3000	3000	3000	3000	3000	225	225	225	225	225	130	156	157	174	298	293	293	293	184	184	51	51	55	51	51	51	51	90	51	86	93	93	89	85	85	74
DgcC	P0AAP1	372	372	372	372	372	372	372	372	371	371	371	3000	3000	3000	3000	3000	3000	225	225	225	225	225	130	156	157	174	298	293	293	293	184	184	51	51	55	51	51	51	51	90	51	86	93	93	89	85	85	74
DgcQ	P76330	372	372	372	372	372	372	372	372	371	371	371	3000	3000	3000	3000	3000	3000	225	225	225	225	225	130	156	157	174	298	293	293	293	184	184	51	51	55	51	51	51	51	90	51	86	93	93	89	85	85	74
DgcM	P77302	372	372	372	372	372	372	372	372	371	371	371	3000	3000	3000	3000	3000	3000	225	225	225	225	225	130	156	157	174	298	293	293	293	184	184	51	51	55	51	51	51	51	90	51	86	93	93	89	85	85	74
DgcT	P75908	372	372	372	372	372	372	372	372	371	371	371	3000	3000	3000	3000	3000	3000	225	225	225	225	225	130	156	157	174	298	293	293	293	184	184	51	51	55	51	51	51	51	90	51	86	93	93	89	85	85	74
DgcZ	P31129	372	372	372	372	372	372	372	372	371	371	371	3000	3000	3000	3000	3000	3000	225	225	225	225	225	130	156	157	174	298	293	293	293	184	184	51	51	55	51	51	51	51	90	51	86	93	93	89	85	85	74
Tsr	P02942	93	93	93	93	93	93	93	93	94	94	94	225	225	225	225	225	225	3000	3000	3000	3000	3000	275	227	408	271	238	238	167	150	99	99	51	51	51	51	51	51	51	140	67	85	122	122	122	100	99	86
Aer	P50466	93	93	93	93	93	93	93	93	94	94	94	225	225	225	225	225	225	3000	3000	3000	3000	3000	275	227	408	271	238	238	167	150	99	99	51	51	51	51	51	51	51	140	67	85	122	122	122	100	99	86
Trg	P05704	93	93	93	93	93	93	93	93	94	94	94	225	225	225	225	225	225	3000	3000	3000	3000	3000	275	227	408	271	238	238	167	150	99	99	51	51	51	51	51	51	51	140	67	85	122	122	122	100	99	86
Tar	P07017	93	93	93	93	93	93	93	93	94	94	94	225	225	225	225	225	225	3000	3000	3000	3000	3000	275	227	408	271	238	238	167	150	99	99	51	51	51	51	51	51	51	140	67	85	122	122	122	100	99	86
Tap	P07018	93	93	93	93	93	93	93	93	94	94	94	225	225	225	225	225	225	3000	3000	3000	3000	3000	275	227	408	271	238	238	167	150	99	99	51	51	51	51	51	51	51	140	67	85	122	122	122	100	99	86
CheB	P07330	57	57	57	57	57	57	57	57	59	59	59	130	130	130	130	130	130	275	275	275	275	275	3000	3000	1324	516	344	360	349	106	59	59	51	51	51	51	51	51	51	60	51	85	89	89	112	83	85	85
CheR	P07364	51	51	51	51	51	51	51	51	51	51	51	156	156	156	156	156	156	227	227	227	227	227	3000	3000	1720	805	354	360	360	322	106	106	51	51	51	51	51	51	51	54	51	85	101	101	113	62	85	85
CheW	P0A964	72	72	72	72	72	72	72	72	74	74	74	157	157	157	157	157	157	408	408	408	408	408	1324	1720	3000	516	183	158	175	156	99	99	51	51	51	51	51	51	51	54	85	85	129	129	136	112	100	102
CheA	P07363	73	73	73	73	73	73	73	73	74	74	74	174	174	174	174	174	174	271	271	271	271	271	516	805	516	3000	3000	3000	3000	3000	120	120	51	51	51	51	53	51	51	53	85	85	130	130	103	103	95	93
ArcB	P0AEC3	53	53	53	53	53	53	53	53	56	56	56	298	298	298	298	298	298	238	238	238	238	238	344	354	183	3000	3000	3000	3000	3000	367	367	51	51	51	51	53	51	51	51	51	51	85	85	54	51	51	51
EvgS	P30855	54	54	54	54	54	54	54	54	58	58	58	293	293	293	293	293	293	238	238	238	238	238	360	360	158	3000	3000	3000	3000	3000	360	360	51	51	51	51	53	51	51	87	51	51	85	85	83	51	51	51
TorS	P39453	51	51	51	51	51	51	51	51	54	54	54	293	293	293	293	293	293	167	167	167	167	167	349	360	175	3000	3000	3000	3000	3000	483	483	51	51	51	51	53	51	51	51	51	51	85	85	85	51	51	51
RcsD	P39838	100	100	100	100	100	100	100	100	100	100	100	293	293	293	293	293	293	150	150	150	150	150	106	322	156	3000	3000	3000	3000	3000	3000	3000	51	51	51	51	56	52	52	53	51	51	114	114	89	57	60	51
BasS	P30844	51	51	51	51	51	51	51	51	51	51	51	184	184	184	184	184	184	99	99	99	99	99	59	106	99	120	367	360	483	3000	3000	3000	51	51	51	51	53	55	55	51	51	51	61	61	51	51	51	51
QseC	P40719	51	51	51	51	51	51	51	51	51	51	51	184	184	184	184	184	184	99	99	99	99	99	59	106	99	120	367	360	483	3000	3000	3000	51	51	51	51	53	55	55	51	51	51	61	61	51	51	51	51
FdhF	P07658	51	51	51	51	51	51	51	51	51	51	51	51	51	51	51	51	51	51	51	51	51	51	51	51	51	51	51	51	51	51	51	51	3000	242	51	51	51	51	51	51	51	51	51	51	51	51	51	51
YdhV	P76192	51	51	51	51	51	51	51	51	51	51	51	51	51	51	51	51	51	51	51	51	51	51	51	51	51	51	51	51	51	51	51	51	242	3000	51	51	51	51	51	51	51	51	51	51	51	51	51	51
PpdC	P08372	51	51	51	51	51	51	51	51	51	51	51	55	55	55	55	55	55	51	51	51	51	51	51	51	51	51	51	51	51	51	51	51	51	51	3000	227	51	51	51	51	51	51	51	51	51	51	51	51
PpdD	P36647	51	51	51	51	51	51	51	51	51	51	51	51	51	51	51	51	51	51	51	51	51	51	51	51	51	51	51	51	51	51	51	51	51	51	227	3000	51	51	51	51	51	51	51	51	51	51	51	51
CsgG	P0AEA2	51	51	51	51	51	51	51	51	51	51	51	51	51	51	51	51	51	51	51	51	51	51	51	51	51	53	53	53	53	56	53	53	51	51	51	51	3000	51	51	51	51	51	93	93	51	51	51	51
RfaI	P27128	51	51	51	51	51	51	51	51	51	51	51	51	51	51	51	51	51	51	51	51	51	51	51	51	51	51	51	51	51	52	55	55	51	51	51	51	51	3000	3000	51	51	51	51	51	51	51	51	51
RfaJ	P27129	51	51	51	51	51	51	51	51	51	51	51	51	51	51	51	51	51	51	51	51	51	51	51	51	51	51	51	51	51	52	55	55	51	51	51	51	51	3000	3000	51	51	51	51	51	51	51	51	51
CheZ	P0A9H9	53	53	53	53	53	53	53	53	51	51	51	90	90	90	90	90	90	140	140	140	140	140	60	54	54	53	51	87	51	53	51	51	51	51	51	51	51	51	51	3000	51	51	103	103	156	51	77	91
FliD	P24216	51	51	51	51	51	51	51	51	51	51	51	51	51	51	51	51	51	67	67	67	67	67	51	51	85	85	51	51	51	51	51	51	51	51	51	51	51	51	51	51	3000	63	117	117	64	143	86	103
YcgR	P76010	59	59	59	59	59	59	59	59	72	72	72	86	86	86	86	86	86	85	85	85	85	85	85	85	85	85	51	51	51	51	51	51	51	51	51	51	51	51	51	51	63	3000	85	85	85	100	85	102
FliC	P04949	92	92	92	92	92	92	92	92	85	85	85	93	93	93	93	93	93	122	122	122	122	122	89	101	129	130	85	85	85	114	61	61	51	51	51	51	93	51	51	103	117	85	3000	3000	272	373	309	238
FlgL	P29744	92	92	92	92	92	92	92	92	85	85	85	93	93	93	93	93	93	122	122	122	122	122	89	101	129	130	85	85	85	114	61	61	51	51	51	51	93	51	51	103	117	85	3000	3000	272	373	309	238
FliL	P0ABX8	86	86	86	86	86	86	86	86	80	80	80	89	89	89	89	89	89	122	122	122	122	122	112	113	136	103	54	83	85	89	51	51	51	51	51	51	51	51	51	156	64	85	272	272	3000	267	256	303
FliS	P26608	86	86	86	86	86	86	86	86	84	84	84	85	85	85	85	85	85	100	100	100	100	100	83	62	112	103	51	51	51	57	51	51	51	51	51	51	51	51	51	51	143	100	373	373	267	3000	331	256
FlgK	P33235	84	84	84	84	84	84	84	84	76	76	76	85	85	85	85	85	85	99	99	99	99	99	85	85	100	95	51	51	51	60	51	51	51	51	51	51	51	51	51	77	86	85	309	309	256	331	3000	309
FliK	P52614	76	76	76	76	76	76	76	76	63	63	63	74	74	74	74	74	74	86	86	86	86	86	85	85	102	93	51	51	51	51	51	51	51	51	51	51	51	51	51	91	103	102	238	238	303	256	309	3000
FlgE	P75937	87	87	87	87	87	87	87	87	83	83	83	85	85	85	85	85	85	103	103	103	103	103	81	81	104	90	51	55	53	73	51	51	51	51	51	51	51	51	51	76	102	71	247	247	250	214	265	206
FlgH	P0A6S0	57	57	57	57	57	57	57	57	53	53	53	89	89	89	89	89	89	89	89	89	89	89	79	80	109	99	51	73	53	91	51	51	51	51	51	51	51	51	51	155	52	79	276	276	309	263	309	302
FlgI	P0A6S3	54	54	54	54	54	54	54	54	53	53	53	79	79	79	79	79	79	96	96	96	96	96	65	79	114	94	51	53	51	90	51	51	51	51	51	51	51	51	51	155	103	51	309	309	309	276	327	309
FlgA	P75933	53	53	53	53	53	53	53	53	51	51	51	52	52	52	52	52	52	85	85	85	85	85	51	53	105	54	51	51	51	51	51	51	51	51	51	51	51	51	51	103	51	51	223	223	299	203	254	275
FlgF	P75938	53	53	53	53	53	53	53	53	53	53	53	51	51	51	51	51	51	57	57	57	57	57	51	51	113	51	51	51	51	51	51	51	51	51	51	51	51	51	51	54	51	88	307	307	297	681	331	331
FlgJ	P75942	69	69	69	69	69	69	69	69	57	57	57	76	76	76	76	76	76	87	87	87	87	87	51	65	103	82	51	53	51	51	51	51	51	51	51	51	51	51	51	88	64	86	243	243	284	203	206	302
FliM	P06974	85	85	85	85	85	85	85	85	83	83	83	85	85	85	85	85	85	97	97	97	97	97	86	89	112	97	51	51	51	51	51	51	51	51	51	51	51	51	51	102	116	96	309	309	328	352	337	331
FlgD	P75936	85	85	85	85	85	85	85	85	76	76	76	85	85	85	85	85	85	100	100	100	100	100	85	86	109	97	51	53	51	54	51	51	51	51	51	51	51	51	51	103	115	86	314	314	314	331	342	331
FliG	P0ABZ1	85	85	85	85	85	85	85	85	84	84	84	85	85	85	85	85	85	100	100	100	100	100	86	89	103	100	51	51	51	59	51	51	51	51	51	51	51	51	51	100	115	97	317	317	381	336	287	309
FliE	P0A8T5	85	85	85	85	85	85	85	85	76	76	76	83	83	83	83	83	83	94	94	94	94	94	85	85	103	93	51	51	51	51	51	51	51	51	51	51	51	51	51	102	115	86	317	317	452	335	338	331
FlgB	P0ABW9	85	85	85	85	85	85	85	85	76	76	76	79	79	79	79	79	79	91	91	91	91	91	83	85	102	93	51	51	51	53	51	51	51	51	51	51	51	51	51	89	115	86	319	319	467	344	332	333
FlgC	P0ABX2	84	84	84	84	84	84	84	84	76	76	76	83	83	83	83	83	83	95	95	95	95	95	85	85	102	93	51	51	51	53	51	51	51	51	51	51	51	51	51	103	115	85	318	318	447	331	331	331
FliP	P0AC05	85	85	85	85	85	85	85	85	76	76	76	79	79	79	79	79	79	92	92	92	92	92	85	85	103	93	51	51	51	51	51	51	51	51	51	51	51	51	51	100	115	86	312	312	437	331	332	323
FliR	P33135	85	85	85	85	85	85	85	85	76	76	76	79	79	79	79	79	79	91	91	91	91	91	83	85	102	93	51	51	51	51	51	51	51	51	51	51	51	51	51	100	115	86	312	312	438	332	338	331
FliQ	P0AC07	85	85	85	85	85	85	85	85	76	76	76	83	83	83	83	83	83	94	94	94	94	94	85	85	108	94	51	51	51	51	51	51	51	51	51	51	51	51	51	103	115	86	308	308	465	308	331	323
FliF	P25798	84	84	84	84	84	84	84	84	76	76	76	83	83	83	83	83	83	94	94	94	94	94	83	85	103	103	51	53	51	85	51	51	51	51	51	51	51	51	51	86	119	86	329	329	315	331	332	331
FlhA	P76298	85	85	85	85	85	85	85	85	65	65	65	79	79	79	79	79	79	92	92	92	92	92	83	79	100	97	51	51	51	59	51	51	51	51	51	51	51	51	51	89	110	86	312	312	340	331	332	322
LfhA	Q47153	85	85	85	85	85	85	85	85	65	65	65	79	79	79	79	79	79	92	92	92	92	92	83	79	100	97	51	51	51	59	51	51	51	51	51	51	51	51	51	89	110	86	312	312	340	331	332	322
FliN	P15070	58	58	58	58	58	58	58	58	53	53	53	59	59	59	59	59	59	86	86	86	86	86	60	61	94	89	51	51	51	53	51	51	51	51	51	51	51	51	51	99	85	72	180	180	180	167	199	194
FliI	P52612	57	57	57	57	57	57	57	57	54	54	54	57	57	57	57	57	57	86	86	86	86	86	72	79	96	93	51	53	51	53	51	51	51	51	51	51	51	51	51	89	86	85	194	194	180	170	252	180
FlhB	P76299	59	59	59	59	59	59	59	59	54	54	54	60	60	60	60	60	60	89	89	89	89	89	85	85	99	93	51	53	53	51	51	51	51	51	51	51	51	51	51	100	76	85	307	307	211	308	303	204
FlgG	P0ABX5	53	53	53	53	53	53	53	53	51	51	51	60	60	60	60	60	60	89	89	89	89	89	85	72	97	89	51	51	51	51	51	51	51	51	51	51	51	51	51	60	110	85	317	317	256	269	316	223
MotA	P09348	92	92	92	92	92	92	92	92	59	59	59	94	94	94	94	94	94	112	112	112	112	112	85	89	114	97	53	79	53	60	51	51	51	51	51	51	51	51	51	155	86	96	307	307	290	213	277	211
MotB	P0AF06	51	51	51	51	51	51	51	51	51	51	51	85	85	85	85	85	85	99	99	99	99	99	85	85	111	85	51	56	53	51	51	51	51	51	51	51	51	51	51	142	69	85	180	180	208	164	130	183
LafU	Q47154	51	51	51	51	51	51	51	51	51	51	51	85	85	85	85	85	85	99	99	99	99	99	85	85	111	85	51	56	53	51	51	51	51	51	51	51	51	51	51	142	69	85	180	180	208	164	130	183
FlgM	P0AEM4	57	57	57	57	57	57	57	57	57	57	57	51	51	51	51	51	51	72	72	72	72	72	63	51	112	51	51	51	51	51	51	51	51	51	51	51	51	51	51	51	88	155	146	146	172	200	108	170
FliJ	P52613	56	56	56	56	56	56	56	56	57	57	57	54	54	54	54	54	54	86	86	86	86	86	86	62	112	58	51	51	51	51	51	51	51	51	51	51	51	51	51	51	110	104	194	194	194	289	152	302
FliO	P22586	84	84	84	84	84	84	84	84	76	76	76	60	60	60	60	60	60	99	99	99	99	99	106	96	103	101	51	51	51	51	51	51	51	51	51	51	51	51	51	57	71	104	170	170	203	351	132	179
FliH	P31068	51	51	51	51	51	51	51	51	51	51	51	51	51	51	51	51	51	85	85	85	85	85	64	85	96	85	51	51	51	51	51	51	51	51	51	51	51	51	51	51	51	72	170	170	174	183	168	224
[truncated: 29 more columns]

## Sheet: Metadata
UniProt ID	Node Label	LocusTag	BRITE Category	Literature evidence	Reference	Module (SD50)	Module (SD300)	Module (SD1000)	Gene names	Protein names	Gene ontology (biological process)	Cross-reference (KEGG)	Cross-reference (Pfam)	EnsemblBacteria transcript	Cross-reference (BioCyc)
P76446	PdeN	b2176	-	Direct	https://www.ncbi.nlm.nih.gov/pmc/articles/PMC4719445/	Directed motility	C-di-GMP signaling	c-di-GMP catabolism	pdeN rtn b2176 JW2164	Probable cyclic di-GMP phosphodiesterase PdeN (EC 3.1.4.52)		ecj:JW2164;eco:b2176;	PF12792;PF00563;	AAC75237;BAA15984;	EcoCyc:G7148-MONOMER;ECOL316407:JW2164-MONOMER;
P77172	PdeF	b2503	-	Indirect	https://www.ncbi.nlm.nih.gov/pmc/articles/PMC4719445/	Directed motility	C-di-GMP signaling	c-di-GMP catabolism	pdeF yfgF b2503 JW2488	Cyclic di-GMP phosphodiesterase PdeF (EC 3.1.4.52)	cellular response to anoxia [GO:0071454]; cellular response to hydrogen peroxide [GO:0070301]; regulation of single-species biofilm formation [GO:1900190]	ecj:JW2488;eco:b2503;	PF00563;PF05231;	AAC75556;BAA16393;	EcoCyc:G7314-MONOMER;ECOL316407:JW2488-MONOMER;MetaCyc:G7314-MONOMER;
P76261	PdeD	b1815	-	Indirect	https://www.ncbi.nlm.nih.gov/pmc/articles/PMC4719445/	Directed motility	C-di-GMP signaling	c-di-GMP catabolism	pdeD adrB yoaD b1815 JW1804	Probable cyclic di-GMP phosphodiesterase PdeD (EC 3.1.4.52)	cellular response to DNA damage stimulus [GO:0006974]	ecj:JW1804;eco:b1815;	PF12792;PF00563;	AAC74885;BAA15622;	EcoCyc:G6996-MONOMER;ECOL316407:JW1804-MONOMER;
P76204	YdiV	b1707	-	Direct	https://www.microbiologyresearch.org/content/journal/micro/10.1099/mic.0.056036-0	Directed motility	C-di-GMP signaling	c-di-GMP catabolism	ydiV cdgR b1707 JW1697	Putative anti-FlhC(2)FlhD(4) factor YdiV (c-di-GMP regulator CdgR)	negative regulation of bacterial-type flagellum-dependent cell motility [GO:1902201]; negative regulation of DNA-binding transcription factor activity [GO:0043433]; negative regulation of transcription regulatory region DNA binding [GO:2000678]	ecj:JW1697;eco:b1707;	PF00563;	AAC74777;BAE76505;	EcoCyc:G6925-MONOMER;ECOL316407:JW1697-MONOMER;
P75800	PdeI	b0833	-	Direct	https://www.ncbi.nlm.nih.gov/pmc/articles/PMC4719445/	Directed motility	C-di-GMP signaling	c-di-GMP catabolism	pdeI yliE b0833 JW0817	Probable cyclic di-GMP phosphodiesterase PdeI (EC 3.1.4.52)		ecj:JW0817;eco:b0833;	PF17153;PF00563;	AAC73920;BAA35528;	EcoCyc:G6433-MONOMER;ECOL316407:JW0817-MONOMER;
P37646	PdeH	b3525	-	Direct	https://www.ncbi.nlm.nih.gov/pmc/articles/PMC4719445/	Directed motility	C-di-GMP signaling	c-di-GMP catabolism	pdeH yhjH b3525 JW3493	Cyclic di-GMP phosphodiesterase PdeH (EC 3.1.4.52)	regulation of bacterial-type flagellum-dependent cell motility [GO:1902021]	ecj:JW3493;eco:b3525;	PF00563;	AAC76550;BAE77769;	EcoCyc:EG12252-MONOMER;ECOL316407:JW3493-MONOMER;MetaCyc:EG12252-MONOMER;
P75990	BluF	b1163	-	Direct	https://www.ncbi.nlm.nih.gov/pmc/articles/PMC3509220/	Directed motility	C-di-GMP signaling	c-di-GMP catabolism	bluF blrp ycgF b1163 JW1150	Blue light- and temperature-regulated antirepressor BluF (Blrp)	negative regulation of DNA-binding transcription factor activity [GO:0043433]; protein-chromophore linkage [GO:0018298]; response to blue light [GO:0009637]	ecj:JW1150;eco:b1163;	PF04940;PF00563;	AAC74247;BAA35998;	EcoCyc:G6603-MONOMER;ECOL316407:JW1150-MONOMER;
P75995	PdeG	b1168	-	Indirect	https://www.ncbi.nlm.nih.gov/pmc/articles/PMC4719445/	Directed motility	C-di-GMP signaling	c-di-GMP catabolism	pdeG ycgG b1168 JW5174	Probable cyclic di-GMP phosphodiesterase PdeG (EC 3.1.4.52)		ecj:JW5174;eco:b1168;	PF12792;PF00563;	AAC74252;BAA36000;	EcoCyc:G6608-MONOMER;ECOL316407:JW5174-MONOMER;
P13518	CsrD	b3252	-	Direct	https://www.ncbi.nlm.nih.gov/pmc/articles/PMC1578682/	Directed motility	C-di-GMP signaling	c-di-GMP catabolism	csrD yhdA b3252 JW3221	RNase E specificity factor CsrD (Regulator of CsrB and CsrC decay CsrD)	ncRNA catabolic process [GO:0034661]; protein homotetramerization [GO:0051289]; regulation of RNA metabolic process [GO:0051252]	ecj:JW3221;eco:b3252;	PF00563;PF17157;PF00990;	AAC76284;BAE77294;	EcoCyc:EG10018-MONOMER;ECOL316407:JW3221-MONOMER;
P23842	PdeA	b2395	-	Direct	https://www.ncbi.nlm.nih.gov/pmc/articles/PMC4719445/	Directed motility	C-di-GMP signaling	c-di-GMP catabolism	pdeA yfeA b2395 JW5391	Probable cyclic di-GMP phosphodiesterase PdeA (EC 3.1.4.52)		ecj:JW5391;eco:b2395;	PF00563;PF05231;	AAC75454;BAA16267;	EcoCyc:EG11145-MONOMER;ECOL316407:JW5391-MONOMER;
P37649	PdeK	b3529	-	Indirect	https://www.ncbi.nlm.nih.gov/pmc/articles/PMC4719445/	Directed motility	C-di-GMP signaling	c-di-GMP catabolism	pdeK yhjK b3529 JW5943	Probable cyclic di-GMP phosphodiesterase PdeK (EC 3.1.4.52)	signal transduction [GO:0007165]	ecj:JW5943;eco:b3529;	PF00563;PF17154;PF00990;PF00672;	AAC76554;BAE77765;	EcoCyc:EG12256-MONOMER;ECOL316407:JW5943-MONOMER;
P0AA89	DosC	b1490	-	Direct	https://www.cell.com/action/showPdf?pii=S0092-8674%2810%2900019-X	Directed motility	C-di-GMP signaling	c-di-GMP synthesis	dosC dgcO yddV b1490 JW5241	Diguanylate cyclase DosC (DGC) (EC 2.7.7.65) (Direct oxygen-sensing cyclase)	cell adhesion involved in single-species biofilm formation [GO:0043709]; negative regulation of bacterial-type flagellum-dependent cell motility [GO:1902201]	ecj:JW5241;eco:b1490;	PF00990;	AAC74563;BAA15155;	EcoCyc:G6784-MONOMER;ECOL316407:JW5241-MONOMER;MetaCyc:G6784-MONOMER;
P0AAP1	DgcC	b0385	-	Indirect	https://www.cell.com/action/showPdf?pii=S0092-8674%2810%2900019-X	Directed motility	C-di-GMP signaling	c-di-GMP synthesis	dgcC adrA yaiC b0385 JW0376	Probable diguanylate cyclase DgcC (DGC) (EC 2.7.7.65)	cell adhesion involved in single-species biofilm formation [GO:0043709]; negative regulation of bacterial-type flagellum-dependent cell motility [GO:1902201]	ecj:JW0376;eco:b0385;	PF00990;PF05230;	AAC73488;BAE76166;	EcoCyc:EG11257-MONOMER;ECOL316407:JW0376-MONOMER;MetaCyc:EG11257-MONOMER;
P76330	DgcQ	b1956	-	Direct	https://www.cell.com/action/showPdf?pii=S0092-8674%2810%2900019-X	Directed motility	C-di-GMP signaling	c-di-GMP synthesis	dgcQ yedQ b1956 JW5832	Probable diguanylate cyclase DgcQ (DGC) (EC 2.7.7.65) (Cellulose synthesis regulatory protein)	cell adhesion involved in single-species biofilm formation [GO:0043709]; cellulose biosynthetic process [GO:0030244]; negative regulation of bacterial-type flagellum-dependent cell motility [GO:1902201]	ecj:JW5832;eco:b1956;	PF17151;PF00990;	AAC75022;BAA15784;	EcoCyc:G7049-MONOMER;ECOL316407:JW5832-MONOMER;
P77302	DgcM	b1341	-	Indirect	https://www.cell.com/action/showPdf?pii=S0092-8674%2810%2900019-X	Directed motility	C-di-GMP signaling	c-di-GMP synthesis	dgcM ydaM b1341 JW5206	Diguanylate cyclase DgcM (DGC) (EC 2.7.7.65)	cell adhesion involved in single-species biofilm formation [GO:0043709]; negative regulation of bacterial-type flagellum-dependent cell motility [GO:1902201]; positive regulation of DNA-binding transcription factor activity [GO:0051091]; positive regulation of single-species biofilm formation on inanimate substrate [GO:1900233]	ecj:JW5206;eco:b1341;	PF00990;PF08448;	AAC74423;BAA14945;	EcoCyc:G6673-MONOMER;ECOL316407:JW5206-MONOMER;MetaCyc:G6673-MONOMER;
P75908	DgcT	b1025	-	Direct	https://pubmed.ncbi.nlm.nih.gov/18713317/	Directed motility	C-di-GMP signaling	c-di-GMP synthesis	dgcT ycdT b1025 JW5143	Probable diguanylate cyclase DgcT (DGC) (EC 2.7.7.65)	negative regulation of cellular component movement [GO:0051271]; single-species submerged biofilm formation [GO:0090609]	ecj:JW5143;eco:b1025;	PF00990;PF17158;	AAC74110;BAA35810;	EcoCyc:G6532-MONOMER;ECOL316407:JW5143-MONOMER;MetaCyc:G6532-MONOMER;
P31129	DgcZ	b1535	-	Direct	https://pubmed.ncbi.nlm.nih.gov/18713317/	Directed motility	C-di-GMP signaling	c-di-GMP synthesis	dgcZ ydeG ydeH b1535 JW1528	Diguanylate cyclase DgcZ (DGC) (EC 2.7.7.65) (Zinc-sensory diguanylate cyclase)	cell adhesion involved in single-species biofilm formation [GO:0043709]; metabolic process [GO:0008152]; negative regulation of bacterial-type flagellum assembly [GO:1902209]; negative regulation of bacterial-type flagellum-dependent cell motility [GO:1902201]; negative regulation of cellular component movement [GO:0051271]; positive regulation of single-species biofilm formation on inanimate sub…	ecj:JW1528;eco:b1535;	PF00990;	AAC74608;BAA18882;	EcoCyc:EG11643-MONOMER;ECOL316407:JW1528-MONOMER;MetaCyc:EG11643-MONOMER;
P02942	Tsr	b4355	MCPs	In BRITE		Directed motility	Chemotaxis signaling	Chemoreception	tsr cheD b4355 JW4318	Methyl-accepting chemotaxis protein I (MCP-I) (Serine chemoreceptor protein)	cell motility [GO:0048870]; cellular response to amino acid stimulus [GO:0071230]; chemotaxis [GO:0006935]; detection of chemical stimulus [GO:0009593]; receptor clustering [GO:0043113]; regulation of bacterial-type flagellum-dependent cell motility [GO:1902021]; regulation of chemotaxis [GO:0050920]; regulation of protein histidine kinase activity [GO:0032110]; response to amino acid [GO:0043200…	ecj:JW4318;eco:b4355;	PF00672;PF00015;PF02203;	AAC77311;BAE78345;	EcoCyc:TSR-MONOMER;ECOL316407:JW4318-MONOMER;
P50466	Aer	b3072	MCPs	In BRITE		Directed motility	Chemotaxis signaling	Chemoreception	aer air yqjJ b3072 JW3043	Aerotaxis receptor	chemotaxis [GO:0006935]; positive aerotaxis [GO:0052131]; signal transduction [GO:0007165]	ecj:JW3043;eco:b3072;	PF00015;PF08447;	AAC76107;BAE77122;	EcoCyc:G7595-MONOMER;ECOL316407:JW3043-MONOMER;
P05704	Trg	b1421	MCPs	In BRITE		Directed motility	Chemotaxis signaling	Chemoreception	trg b1421 JW1417	Methyl-accepting chemotaxis protein III (MCP-III) (Ribose and galactose chemoreceptor protein)	chemotaxis [GO:0006935]; signal transduction [GO:0007165]	ecj:JW1417;eco:b1421;	PF00672;PF00015;PF02203;	AAC74503;BAA15044;	EcoCyc:TRG-MONOMER;ECOL316407:JW1417-MONOMER;
P07017	Tar	b1886	MCPs	In BRITE		Directed motility	Chemotaxis signaling	Chemoreception	tar cheM b1886 JW1875	Methyl-accepting chemotaxis protein II (MCP-II) (Aspartate chemoreceptor protein)	cellular response to amino acid stimulus [GO:0071230]; chemotaxis [GO:0006935]; detection of chemical stimulus [GO:0009593]; positive regulation of post-translational protein modification [GO:1901875]; regulation of chemotaxis [GO:0050920]; signal complex assembly [GO:0007172]; signal transduction [GO:0007165]	ecj:JW1875;eco:b1886;	PF00672;PF00015;PF02203;	AAC74956;BAA15702;	EcoCyc:TAR-MONOMER;ECOL316407:JW1875-MONOMER;
P07018	Tap	b1885	MCPs	In BRITE		Directed motility	Chemotaxis signaling	Chemoreception	tap b1885 JW1874	Methyl-accepting chemotaxis protein IV (MCP-IV) (Dipeptide chemoreceptor protein)	chemotaxis [GO:0006935]; signal transduction [GO:0007165]	ecj:JW1874;eco:b1885;	PF00672;PF00015;PF02203;	AAC74955;BAA15701;	EcoCyc:TAP-MONOMER;ECOL316407:JW1874-MONOMER;
P07330	CheB	b1883	Two component system proteins	In BRITE		Directed motility	Chemotaxis signaling	Chemotransmission	cheB b1883 JW1872	Protein-glutamate methylesterase/protein-glutamine glutaminase (EC 3.1.1.61) (EC 3.5.1.44) (Chemotaxis response regulator protein-glutamate methylesterase/glutamine deamidase) (Methyl-accepting chemotaxis proteins-specific methylesterase/deamidase) (MCP-specific methylesterase/deamidase)	chemotaxis [GO:0006935]; protein deamination [GO:0018277]; protein demethylation [GO:0006482]; signal transduction by protein phosphorylation [GO:0023014]	ecj:JW1872;eco:b1883;	PF01339;PF00072;	AAC74953;BAA15699;	EcoCyc:CHEB-MONOMER;ECOL316407:JW1872-MONOMER;MetaCyc:CHEB-MONOMER;
P07364	CheR	b1884	Two component system proteins	In BRITE		Directed motility	Chemotaxis signaling	Chemotransmission	cheR cheX b1884 JW1873	Chemotaxis protein methyltransferase (EC 2.1.1.80)	chemotaxis [GO:0006935]; protein methylation [GO:0006479]	ecj:JW1873;eco:b1884;	PF01739;PF03705;	AAC74954;BAA15700;	EcoCyc:CHER-MONOMER;ECOL316407:JW1873-MONOMER;MetaCyc:CHER-MONOMER;
P0A964	CheW	b1887	Two component system proteins	In BRITE		Directed motility	Chemotaxis signaling	Chemotransmission	cheW b1887 JW1876	Chemotaxis protein CheW	aerotaxis [GO:0009454]; chemotaxis [GO:0006935]; establishment of localization in cell [GO:0051649]; positive regulation of post-translational protein modification [GO:1901875]; positive regulation of protein histidine kinase activity [GO:0010864]; signal transduction [GO:0007165]; signal transduction by protein phosphorylation [GO:0023014]	ecj:JW1876;eco:b1887;	PF01584;	AAC74957;BAA15703;	EcoCyc:CHEW-MONOMER;ECOL316407:JW1876-MONOMER;
P07363	CheA	b1888	Two component system proteins	In BRITE		Directed motility	Chemotaxis signaling	Signal transducing histidine kinase	cheA b1888 JW1877	Chemotaxis protein CheA (EC 2.7.13.3)	aerotaxis [GO:0009454]; chemotaxis [GO:0006935]; establishment of localization in cell [GO:0051649]; negative regulation of protein modification process [GO:0031400]; peptidyl-histidine phosphorylation [GO:0018106]; phosphorelay signal transduction system [GO:0000160]; phosphorylation [GO:0016310]; positive regulation of post-translational protein modification [GO:1901875]; protein autophosphoryl…	ecj:JW1877;eco:b1888;	PF01584;PF09078;PF02895;PF02518;PF01627;	AAC74958;BAA15709;	ECOL316407:JW1877-MONOMER;
P0AEC3	ArcB	b3210	-	Direct	https://jb.asm.org/content/189/3/950	Directed motility	Chemotaxis signaling	Signal transducing histidine kinase	arcB b3210 JW5536	Aerobic respiration control sensor protein ArcB (EC 2.7.13.3)	protein autophosphorylation [GO:0046777]; regulation of transcription, DNA-templated [GO:0006355]; signal transduction by protein phosphorylation [GO:0023014]	ecj:JW5536;eco:b3210;	PF02518;PF00512;PF18415;PF01627;PF00989;PF00072;	AAT48172;BAE77254;	EcoCyc:ARCB-MONOMER;ECOL316407:JW5536-MONOMER;
P30855	EvgS	b2370	-	Direct	https://jb.asm.org/content/189/3/950	Directed motility	Chemotaxis signaling	Signal transducing histidine kinase	evgS b2370 JW2367	Sensor protein EvgS (EC 2.7.13.3)	phosphorelay signal transduction system [GO:0000160]; protein autophosphorylation [GO:0046777]; response to acidic pH [GO:0010447]	ecj:JW2367;eco:b2370;	PF02518;PF00512;PF01627;PF00072;PF00497;	AAC75429;BAA16241;	EcoCyc:EVGS-MONOMER;ECOL316407:JW2367-MONOMER;
P39453	TorS	b0993	-	Novel		Directed motility	Chemotaxis signaling	Signal transducing histidine kinase	torS yccI b0993 JW5135	Sensor protein TorS (EC 2.7.13.3)	anaerobic respiration [GO:0009061]; cellular response to organic substance [GO:0071310]; phosphorelay signal transduction system [GO:0000160]; protein autophosphorylation [GO:0046777]; protein dephosphorylation [GO:0006470]	ecj:JW5135;eco:b0993;	PF00672;PF02518;PF00512;PF01627;PF00072;	AAC74078;BAA36135;	EcoCyc:TORS-MONOMER;ECOL316407:JW5135-MONOMER;
P39838	RcsD	b2216	-	Indirect	https://www.annualreviews.org/doi/pdf/10.1146/annurev.micro.59.050405.101230?casa_token=dfss1cFqIkIAAAAA:YXNA3aFKTIlnMRCBd4BQVc0F2je7g9D5qfK3aV2ZbcYLPbhcsud8JgYbMlOeAz8T1WzLmyDv75-EmQ	Directed motility	Chemotaxis signaling	Signal transducing histidine kinase	rcsD yojN yojP yojQ b2216 JW2204	Phosphotransferase RcsD (EC 2.7.2.-) (Phosphotransfer intermediate RcsD)	phosphorelay signal transduction system [GO:0000160]; protein autophosphorylation [GO:0046777]	ecj:JW2204;eco:b2216;	PF02518;PF01627;PF16359;	AAC75276;BAA15999;	EcoCyc:EG12385-MONOMER;ECOL316407:JW2204-MONOMER;
P30844	BasS	b4112	-	Indirect	https://www.nature.com/articles/s41467-018-04996-x	Directed motility	Chemotaxis signaling	Signal transducing histidine kinase	basS pmrB b4112 JW4073	Sensor protein BasS (EC 2.7.13.3)	peptidyl-histidine phosphorylation [GO:0018106]; phosphorelay signal transduction system [GO:0000160]; response to iron(III) ion [GO:0010041]; signal transduction by protein phosphorylation [GO:0023014]	ecj:JW4073;eco:b4112;	PF02518;PF00512;	AAC77073;BAE78114;	EcoCyc:BASS-MONOMER;ECOL316407:JW4073-MONOMER;
P40719	QseC	b3026	-	Direct	https://onlinelibrary.wiley.com/doi/full/10.1046/j.1365-2958.2002.02803.x?sid=nlm%3Apubmed	Directed motility	Chemotaxis signaling	Signal transducing histidine kinase	qseC ygiY b3026 JW2994	Sensor protein QseC (EC 2.7.13.3)	phosphorelay signal transduction system [GO:0000160]	ecj:JW2994;eco:b3026;	PF08521;PF02518;PF00512;	AAC76062;BAE77082;	EcoCyc:EG12658-MONOMER;ECOL316407:JW2994-MONOMER;
P07658	FdhF	b4079	-	Indirect	S typhi: https://www.ncbi.nlm.nih.gov/pmc/articles/PMC94776/	Directed motility	-	-	fdhF b4079 JW4040	Formate dehydrogenase H (EC 1.17.1.9) (EC 1.17.99.7) (Formate dehydrogenase-H subunit alpha) (FDH-H) (Formate-hydrogen-lyase-linked, selenocysteine-containing polypeptide)	cellular respiration [GO:0045333]; formate oxidation [GO:0015944]	ecj:JW4040;eco:b4079;	PF04879;PF00384;PF01568;	AAD13462;BAE78081;	EcoCyc:FORMATEDEHYDROGH-MONOMER;ECOL316407:JW4040-MONOMER;MetaCyc:FORMATEDEHYDROGH-MONOMER;
P76192	YdhV	b1673	-	Direct	https://jb.asm.org/content/189/3/950	Directed motility	-	-	ydhV b1673 JW5272	Uncharacterized oxidoreductase YdhV (EC 1.-.-.-)		ecj:JW5272;eco:b1673;	PF01314;PF02730;	AAC74743;BAE76498;	EcoCyc:G6901-MONOMER;ECOL316407:JW5272-MONOMER;
P08372	PpdC	b2823	-	Direct	https://jb.asm.org/content/189/3/950	Directed motility	-	-	ppdC ygdA b2823 JW2791	Prepilin peptidase-dependent protein C		ecj:JW2791;eco:b2823;	PF07963;PF12528;	AAC75862;BAE76892;	EcoCyc:EG11154-MONOMER;ECOL316407:JW2791-MONOMER;
P36647	PpdD	b0108	-	Novel		Directed motility	-	-	ppdD b0108 JW0104	Prepilin peptidase-dependent protein D		ecj:JW0104;eco:b0108;	PF07963;	AAC73219;BAB96678;	EcoCyc:EG12107-MONOMER;ECOL316407:JW0104-MONOMER;
P0AEA2	CsgG	b1037	-	Novel		Directed motility	Flagellum	-	csgG b1037 JW1020	Curli production assembly/transport component CsgG	biological adhesion [GO:0022610]; protein transmembrane transport [GO:0071806]; single-species biofilm formation [GO:0044010]	ecj:JW1020;eco:b1037;	PF03783;	AAC74121;BAA35818;	EcoCyc:G6543-MONOMER;ECOL316407:JW1020-MONOMER;
P27128	RfaI	b3627	-	Direct	https://www.ncbi.nlm.nih.gov/pmc/articles/PMC1797309/	Directed motility	LPS biosynthesis	LPS biosynthesis	rfaI waaI b3627 JW3602	Lipopolysaccharide 1,3-galactosyltransferase (EC 2.4.1.44) (Lipopolysaccharide 3-alpha-galactosyltransferase)	lipopolysaccharide core region biosynthetic process [GO:0009244]	ecj:JW3602;eco:b3627;	PF01501;PF08437;	AAC76651;BAE77665;	EcoCyc:EG11352-MONOMER;ECOL316407:JW3602-MONOMER;MetaCyc:EG11352-MONOMER;
P27129	RfaJ	b3626	-	Direct	https://www.ncbi.nlm.nih.gov/pmc/articles/PMC1797309/	Directed motility	LPS biosynthesis	LPS biosynthesis	rfaJ waaJ b3626 JW3601	Lipopolysaccharide 1,2-glucosyltransferase (EC 2.4.1.58)	lipopolysaccharide core region biosynthetic process [GO:0009244]	ecj:JW3601;eco:b3626;	PF01501;PF08437;	AAC76650;BAE77666;	EcoCyc:EG11353-MONOMER;ECOL316407:JW3601-MONOMER;MetaCyc:EG11353-MONOMER;
P0A9H9	CheZ	b1881	Two component system proteins	In BRITE		Directed motility	-	-	cheZ b1881 JW1870	Protein phosphatase CheZ (EC 3.1.3.-) (Chemotaxis protein CheZ)	archaeal or bacterial-type flagellum-dependent cell motility [GO:0097588]; chemotaxis [GO:0006935]; protein dephosphorylation [GO:0006470]; regulation of chemotaxis [GO:0050920]	ecj:JW1870;eco:b1881;	PF04344;	AAC74951;BAA15697;	EcoCyc:CHEZ-MONOMER;ECOL316407:JW1870-MONOMER;
P24216	FliD	b1924	Rod,hook and filament	In BRITE		Directed motility	-	-	fliD flaV flbC b1924 JW1909	Flagellar hook-associated protein 2 (HAP2) (Filament cap protein) (Flagellar cap protein)	bacterial-type flagellum-dependent cell motility [GO:0071973]; cell adhesion [GO:0007155]	ecj:JW1909;eco:b1924;	PF07195;PF02465;	AAC74991;BAA15752;	EcoCyc:EG10841-MONOMER;ECOL316407:JW1909-MONOMER;
P76010	YcgR	b1194	-	Direct	https://www.cell.com/fulltext/S1097-2765(10)00200-5	Directed motility	-	-	ycgR b1194 JW1183	Flagellar brake protein YcgR (Cyclic di-GMP binding protein YcgR)	bacterial-type flagellum-dependent cell motility [GO:0071973]; regulation of bacterial-type flagellum-dependent cell motility by regulation of motor speed [GO:0071945]	ecj:JW1183;eco:b1194;	PF07238;PF07317;	AAC74278;BAA36052;	EcoCyc:G6623-MONOMER;ECOL316407:JW1183-MONOMER;
P04949	FliC	b1923	Rod,hook and filament	In BRITE		Directed motility	Flagellum	Flagellar filament	fliC flaF hag b1923 JW1908	Flagellin	bacterial-type flagellum-dependent cell motility [GO:0071973]	ecj:JW1908;eco:b1923;	PF00700;PF08884;PF00669;	AAC74990;BAA15751;	EcoCyc:EG10321-MONOMER;ECOL316407:JW1908-MONOMER;
P29744	FlgL	b1083	Rod,hook and filament	In BRITE		Directed motility	Flagellum	Flagellar filament	flgL flaT flaU b1083 JW1070	Flagellar hook-associated protein 3 (HAP3) (Hook-filament junction protein)	bacterial-type flagellum-dependent cell motility [GO:0071973]	ecj:JW1070;eco:b1083;	PF00669;	AAC74167;BAA35892;	EcoCyc:EG11545-MONOMER;ECOL316407:JW1070-MONOMER;
P0ABX8	FliL	b1944	Rod,hook and filament	In BRITE		Directed motility	Flagellum	-	fliL cheC1 fla AI fla QI b1944 JW1928	Flagellar protein FliL	bacterial-type flagellum-dependent swarming motility [GO:0071978]; chemotaxis [GO:0006935]	ecj:JW1928;eco:b1944;	PF03748;	AAC75011;BAA15769;	EcoCyc:EG10322-MONOMER;ECOL316407:JW1928-MONOMER;
P26608	FliS	b1925	Chaperones	In BRITE		Directed motility	Flagellum	-	fliS b1925 JW1910	Flagellar secretion chaperone FliS	bacterial-type flagellum assembly [GO:0044780]; bacterial-type flagellum-dependent cell motility [GO:0071973]	ecj:JW1910;eco:b1925;	PF02561;	AAC74992;BAA15753;	EcoCyc:EG11388-MONOMER;ECOL316407:JW1910-MONOMER;
P33235	FlgK	b1082	Rod,hook and filament	In BRITE		Directed motility	Flagellum	-	flgK flaS flaW b1082 JW1069	Flagellar hook-associated protein 1 (HAP1)	bacterial-type flagellum assembly [GO:0044780]; bacterial-type flagellum-dependent cell motility [GO:0071973]	ecj:JW1069;eco:b1082;	PF00460;PF06429;	AAC74166;BAA35891;	EcoCyc:EG11967-MONOMER;ECOL316407:JW1069-MONOMER;
P52614	FliK	b1943	Rod,hook and filament	In BRITE		Directed motility	Flagellum	-	fliK flaE flaR b1943 JW1927	Flagellar hook-length control protein	bacterial-type flagellum assembly [GO:0044780]; bacterial-type flagellum-dependent cell motility [GO:0071973]	ecj:JW1927;eco:b1943;	PF02120;	AAC75010;BAA15768;	EcoCyc:G379-MONOMER;ECOL316407:JW1927-MONOMER;
P75937	FlgE	b1076	Rod,hook and filament	In BRITE		Directed motility	Flagellum	-	flgE fla FV flaK b1076 JW1063	Flagellar hook protein FlgE	bacterial-type flagellum-dependent swarming motility [GO:0071978]	ecj:JW1063;eco:b1076;	PF07559;PF00460;PF06429;	AAC74160;BAA35885;	EcoCyc:G361-MONOMER;ECOL316407:JW1063-MONOMER;
P0A6S0	FlgH	b1079	M,S,P and L rings	In BRITE		Directed motility	Flagellum	L- and p-rings	flgH fla FVIII flaY b1079 JW5153	Flagellar L-ring protein (Basal body L-ring protein)	bacterial-type flagellum-dependent cell motility [GO:0071973]; response to osmotic stress [GO:0006970]	ecj:JW5153;eco:b1079;	PF02107;	AAC74163;BAA35888;	EcoCyc:FLGH-FLAGELLAR-L-RING;ECOL316407:JW5153-MONOMER;
P0A6S3	FlgI	b1080	M,S,P and L rings	In BRITE		Directed motility	Flagellum	L- and p-rings	flgI fla FIX flaM b1080 JW1067	Flagellar P-ring protein (Basal body P-ring protein)	bacterial-type flagellum-dependent cell motility [GO:0071973]; cellular response to DNA damage stimulus [GO:0006974]	ecj:JW1067;eco:b1080;	PF02119;	AAC74164;BAA35889;	EcoCyc:FLGI-FLAGELLAR-P-RING;ECOL316407:JW1067-MONOMER;
P75933	FlgA	b1072	M,S,P and L rings	In BRITE		Directed motility	Flagellum	-	flgA b1072 JW1059	Flagella basal body P-ring formation protein FlgA	bacterial-type flagellum assembly [GO:0044780]; bacterial-type flagellum-dependent cell motility [GO:0071973]	ecj:JW1059;eco:b1072;	PF13144;	AAC74156;BAA35880;	EcoCyc:G357-MONOMER;ECOL316407:JW1059-MONOMER;
P75938	FlgF	b1077	Rod,hook and filament	In BRITE		Directed motility	Flagellum	Flagellar rod	flgF fla FVI flaX b1077 JW1064	Flagellar basal-body rod protein FlgF (Putative proximal rod protein)	bacterial-type flagellum-dependent cell motility [GO:0071973]; bacterial-type flagellum-dependent swarming motility [GO:0071978]	ecj:JW1064;eco:b1077;	PF00460;PF06429;	AAC74161;BAA35886;	EcoCyc:FLGF-FLAGELLAR-MOTOR-ROD-PROTEIN;ECOL316407:JW1064-MONOMER;
P75942	FlgJ	b1081	Rod,hook and filament	In BRITE		Directed motility	Flagellum	Flagellar rod	flgJ fla FX flaZ b1081 JW1068	Peptidoglycan hydrolase FlgJ (EC 3.2.1.-) (Muramidase FlgJ)	bacterial-type flagellum assembly [GO:0044780]; bacterial-type flagellum-dependent cell motility [GO:0071973]; cell wall organization [GO:0071555]; metabolic process [GO:0008152]	ecj:JW1068;eco:b1081;	PF01832;PF10135;	AAC74165;BAA35890;	EcoCyc:G366-MONOMER;ECOL316407:JW1068-MONOMER;
P06974	FliM	b1945	C-ring	In BRITE		Directed motility	Flagellum	Flagellar basal body	fliM cheC2 fla AII fla QII b1945 JW1929	Flagellar motor switch protein FliM	bacterial-type flagellum-dependent cell motility [GO:0071973]; positive chemotaxis [GO:0050918]	ecj:JW1929;eco:b1945;	PF02154;PF01052;	AAC75012;BAA15770;	EcoCyc:FLIM-FLAGELLAR-C-RING-SWITCH;ECOL316407:JW1929-MONOMER;
P75936	FlgD	b1075	Rod,hook and filament	In BRITE		Directed motility	Flagellum	Flagellar basal body	flgD fla FIV flaV b1075 JW1062	Basal-body rod modification protein FlgD	bacterial-type flagellum-dependent swarming motility [GO:0071978]; bacterial-type flagellum organization [GO:0044781]	ecj:JW1062;eco:b1075;	PF03963;PF13860;PF13861;	AAC74159;BAA35883;	EcoCyc:G360-MONOMER;ECOL316407:JW1062-MONOMER;
P0ABZ1	FliG	b1939	C-ring	In BRITE		Directed motility	Flagellum	-	fliG fla AII.2 fla BII b1939 JW1923	Flagellar motor switch protein FliG	bacterial-type flagellum assembly [GO:0044780]; bacterial-type flagellum-dependent cell motility [GO:0071973]; chemotaxis [GO:0006935]	ecj:JW1923;eco:b1939;	PF01706;PF14841;PF14842;	AAC75006;BAA15764;	EcoCyc:FLIG-FLAGELLAR-SWITCH-PROTEIN;ECOL316407:JW1923-MONOMER;
P0A8T5	FliE	b1937	Rod,hook and filament	In BRITE		Directed motility	Flagellum	Flagellar basal body	fliE fla AI flaN b1937 JW1921	Flagellar hook-basal body complex protein FliE	bacterial-type flagellum-dependent cell motility [GO:0071973]	ecj:JW1921;eco:b1937;	PF02049;	AAC75004;BAA15760;	EcoCyc:EG11346-MONOMER;ECOL316407:JW1921-MONOMER;
P0ABW9	FlgB	b1073	Rod,hook and filament	In BRITE		Directed motility	Flagellum	Flagellar basal body	flgB fla FII flbA b1073 JW1060	Flagellar basal body rod protein FlgB (Putative proximal rod protein)	bacterial-type flagellum-dependent swarming motility [GO:0071978]	ecj:JW1060;eco:b1073;	PF00460;	AAC74157;BAA35881;	EcoCyc:FLGB-FLAGELLAR-MOTOR-ROD-PROTEIN;ECOL316407:JW1060-MONOMER;
P0ABX2	FlgC	b1074	Rod,hook and filament	In BRITE		Directed motility	Flagellum	Flagellar basal body	flgC fla FIII flaW b1074 JW1061	Flagellar basal-body rod protein FlgC (Putative proximal rod protein)	bacterial-type flagellum-dependent swarming motility [GO:0071978]	ecj:JW1061;eco:b1074;	PF00460;PF06429;	AAC74158;BAA35882;	EcoCyc:FLGC-FLAGELLAR-MOTOR-ROD-PROTEIN;ECOL316407:JW1061-MONOMER;
P0AC05	FliP	b1948	Type-III secretion	In BRITE		Directed motility	Flagellum	Flagellar basal body	fliP flaR b1948 JW1932	Flagellar biosynthetic protein FliP	bacterial-type flagellum organization [GO:0044781]; protein secretion [GO:0009306]	ecj:JW1932;eco:b1948;	PF00813;	AAC75015;BAA15773;	EcoCyc:EG11975-MONOMER;ECOL316407:JW1932-MONOMER;
P33135	FliR	b1950	Type-III secretion	In BRITE		Directed motility	Flagellum	Flagellar basal body	fliR flaP b1950 JW1934	Flagellar biosynthetic protein FliR	bacterial-type flagellum assembly [GO:0044780]; protein targeting [GO:0006605]	ecj:JW1934;eco:b1950;	PF01311;	AAC75017;BAA15775;	EcoCyc:EG11977-MONOMER;ECOL316407:JW1934-MONOMER;
P0AC07	FliQ	b1949	Type-III secretion	In BRITE		Directed motility	Flagellum	Flagellar basal body	fliQ flaQ b1949 JW1933	Flagellar biosynthetic protein FliQ	bacterial-type flagellum assembly [GO:0044780]; protein secretion [GO:0009306]	ecj:JW1933;eco:b1949;	PF01313;	AAC75016;BAA15774;	EcoCyc:EG11976-MONOMER;ECOL316407:JW1933-MONOMER;
P25798	FliF	b1938	M,S,P and L rings	In BRITE		Directed motility	Flagellum	Flagellar basal body	fliF fla AII.1 fla BI b1938 JW1922	Flagellar M-ring protein	bacterial-type flagellum-dependent cell motility [GO:0071973]	ecj:JW1922;eco:b1938;	PF01514;PF08345;	AAC75005;BAA15763;	EcoCyc:FLIF-FLAGELLAR-MS-RING;ECOL316407:JW1922-MONOMER;
P76298	FlhA	b1879	Type-III secretion	In BRITE		Directed motility	Flagellum	Flagellar basal body	flhA b1879 JW1868	Flagellar biosynthesis protein FlhA	bacterial-type flagellum assembly [GO:0044780]; protein secretion [GO:0009306]	ecj:JW1868;eco:b1879;	PF00771;	AAC74949;BAA15688;	EcoCyc:G370-MONOMER;ECOL316407:JW1868-MONOMER;
Q47153	LfhA	Ukn1	-			Directed motility	Flagellum	Flagellar basal body	lfhA fhiA b0229 JW5811	Putative truncated flagellar export/assembly protein LfhA	bacterial-type flagellum assembly [GO:0044780]; protein secretion [GO:0009306]		PF00771;
P15070	FliN	b1946	C-ring	In BRITE		Directed motility	Flagellum	-	fliN flaN motD b1946 JW1930	Flagellar motor switch protein FliN	bacterial-type flagellum-dependent cell motility [GO:0071973]; chemotaxis [GO:0006935]	ecj:JW1930;eco:b1946;	PF01052;PF16973;	AAC75013;BAA15771;	EcoCyc:FLIN-FLAGELLAR-C-RING-SWITCH;ECOL316407:JW1930-MONOMER;
P52612	FliI	b1941	Type-III secretion	In BRITE		Directed motility	Flagellum	Flagellar basal body	fliI fla AIII flaC b1941 JW1925	Flagellum-specific ATP synthase (EC 7.1.2.2)	ATP biosynthetic process [GO:0006754]; bacterial-type flagellum assembly [GO:0044780]; bacterial-type flagellum-dependent cell motility [GO:0071973]; ion transport [GO:0006811]; protein secretion by the type III secretion system [GO:0030254]	ecj:JW1925;eco:b1941;	PF00006;PF18269;	AAC75008;BAA15766;	EcoCyc:G377-MONOMER;ECOL316407:JW1925-MONOMER;
P76299	FlhB	b1880	Type-III secretion	In BRITE		Directed motility	Flagellum	Flagellar basal body	flhB yecQ b1880 JW1869	Flagellar biosynthetic protein FlhB	bacterial-type flagellum assembly [GO:0044780]; protein secretion [GO:0009306]	ecj:JW1869;eco:b1880;	PF01312;	AAC74950;BAA15696;	EcoCyc:G7028-MONOMER;ECOL316407:JW1869-MONOMER;
P0ABX5	FlgG	b1078	Rod,hook and filament	In BRITE		Directed motility	Flagellum	-	flgG fla FVII flaL b1078 JW1065	Flagellar basal-body rod protein FlgG (Distal rod protein)	bacterial-type flagellum-dependent cell motility [GO:0071973]; bacterial-type flagellum-dependent swarming motility [GO:0071978]	ecj:JW1065;eco:b1078;	PF00460;PF06429;	AAC74162;BAA35887;	EcoCyc:FLGG-FLAGELLAR-MOTOR-ROD-PROTEIN;ECOL316407:JW1065-MONOMER;
P09348	MotB	b1890	Motor/Switch	In BRITE		Directed motility	Flagellum	Flagellar rotation	motA flaJ b1890 JW1879	Motility protein A (Chemotaxis protein MotA)	bacterial-type flagellum-dependent cell motility [GO:0071973]; bacterial-type flagellum-dependent swarming motility [GO:0071978]; chemotaxis [GO:0006935]; ion transport [GO:0006811]	ecj:JW1879;eco:b1890;	PF01618;	AAC74960;BAA15711;	EcoCyc:MOTA-FLAGELLAR-MOTOR-STATOR-PROTEIN;ECOL316407:JW1879-MONOMER;
P0AF06	MotB	b1889	Motor/Switch	In BRITE		Directed motility	Flagellum	Flagellar rotation	motB b1889 JW1878	Motility protein B (Chemotaxis protein MotB)	archaeal or bacterial-type flagellum-dependent cell motility [GO:0097588]; chemotaxis [GO:0006935]	ecj:JW1878;eco:b1889;	PF13677;PF00691;	AAC74959;BAA15710;	EcoCyc:MOTB-FLAGELLAR-MOTOR-STATOR-PROTEIN;ECOL316407:JW1878-MONOMER;
Q47154	LafU	Ukn2	-			Directed motility	Flagellum	Flagellar rotation	lafU mbhA b0230 JW5812	Putative truncated flagellar export/assembly protein LafU			PF00691;
P0AEM4	FlgM	b1071	Regulation	In BRITE		Directed motility	Flagellum	-	flgM b1071 JW1058	Negative regulator of flagellin synthesis (Anti-sigma-28 factor)	bacterial-type flagellum organization [GO:0044781]; negative regulation of proteolysis [GO:0045861]; negative regulation of transcription, DNA-templated [GO:0045892]	ecj:JW1058;eco:b1071;	PF04316;	AAC74155;BAA35879;	EcoCyc:G369-MONOMER;ECOL316407:JW1058-MONOMER;
P52613	FliJ	b1942	Chaperones	In BRITE		Directed motility	Flagellum	-	fliJ flaO flaS b1942 JW1926	Flagellar FliJ protein	bacterial-type flagellum-dependent cell motility [GO:0071973]; bacterial-type flagellum organization [GO:0044781]; chemotaxis [GO:0006935]; protein transport [GO:0015031]	ecj:JW1926;eco:b1942;	PF02050;	AAC75009;BAA15767;	EcoCyc:G378-MONOMER;ECOL316407:JW1926-MONOMER;
P22586	FliO	b1947	Type-III secretion	In BRITE		Directed motility	Flagellum	-	fliO flaP flbD b1947 JW5316	Flagellar protein FliO	archaeal or bacterial-type flagellum-dependent cell motility [GO:0097588]; bacterial-type flagellum organization [GO:0044781]; chemotaxis [GO:0006935]	ecj:JW5316;eco:b1947;	PF04347;	AAC75014;BAA15772;	EcoCyc:EG11224-MONOMER;ECOL316407:JW5316-MONOMER;
P31068	FliH	b1940	Type-III secretion	In BRITE		Directed motility	Flagellum	-	fliH fla AII.3 fla BIII b1940 JW1924	Flagellar assembly protein FliH	bacterial-type flagellum-dependent cell motility [GO:0071973]; bacterial-type flagellum organization [GO:0044781]; protein transport [GO:0015031]	ecj:JW1924;eco:b1940;	PF02108;	AAC75007;BAA15765;	EcoCyc:EG11656-MONOMER;ECOL316407:JW1924-MONOMER;

## Sheet: Module_designations
Spectral Depth 50			Spectral Depth 225			Spectral Depth 300			Spectral Depth 500			Spectral Depth 750				Spectral Depth 1000
Module: Directed Motility			Module: Motility signaling			Module: Flagellum			Module: Chemotransmission			Module: Chemotransmission				Module: Chemoreception
P76446	PdeN		P76446	PdeN		P04949	FliC		P07330	CheB		P07330	CheB			P02942	Tsr
P77172	PdeF		P77172	PdeF		P29744	FlgL		P07364	CheR		P07364	CheR			P50466	Aer
P76261	PdeD		P76261	PdeD		P0ABX8	FliL		P0A964	CheW		P0A964	CheW			P05704	Trg
P76204	YdiV		P76204	YdiV		P26608	FliS		P07363	CheA		P07363	CheA			P07017	Tar
P75800	PdeI		P75800	PdeI		P33235	FlgK		P0AEC3	ArcB		P0AEC3	ArcB			P07018	Tap
P37646	PdeH		P37646	PdeH		P52614	FliK		P30855	EvgS		P30855	EvgS
P75990	BluF		P75990	BluF		P75937	FlgE		P39453	TorS		P39453	TorS			Module: Chemotransmission
P75995	PdeG		P75995	PdeG		P0A6S0	FlgH		P39838	RcsD		P39838	RcsD			P07330	CheB
P13518	CsrD		P13518	CsrD		P0A6S3	FlgI		P30844	BasS		P30844	BasS			P07364	CheR
P23842	PdeA		P23842	PdeA		P75933	FlgA									P0A964	CheW
P37649	PdeK		P37649	PdeK		P75938	FlgF		Module: Chemoreception			Module: Chemoreception
P0AA89	DosC		P0AA89	DosC		P75942	FlgJ		P02942	Tsr		P02942	Tsr			Module Signal transduction
P0AAP1	DgcC		P0AAP1	DgcC		P06974	FliM		P50466	Aer		P50466	Aer			P0A964	CheW
P76330	DgcQ		P76330	DgcQ		P75936	FlgD		P05704	Trg		P05704	Trg			P07363	CheA
P77302	DgcM		P77302	DgcM		P0ABZ1	FliG		P07017	Tar		P07017	Tar			P0AEC3	ArcB
P75908	DgcT		P75908	DgcT		P0A8T5	FliE		P07018	Tap		P07018	Tap			P30855	EvgS
P31129	DgcZ		P31129	DgcZ		P0ABW9	FlgB									P39453	TorS
P02942	Tsr		P02942	Tsr		P0ABX2	FlgC		Module: c-di-GMP synthesis			Module: c-di-GMP synthesis				P39838	RcsD
P50466	Aer		P50466	Aer		P0AC05	FliP		P0AA89	DosC		P0AA89	DosC			P30844	BasS
P05704	Trg		P05704	Trg		P33135	FliR		P0AAP1	DgcC		P0AAP1	DgcC
P07017	Tar		P07017	Tar		P0AC07	FliQ		P76330	DgcQ		P76330	DgcQ			Module: LPS Biosynthesis
P07018	Tap		P07018	Tap		P25798	FliF		P77302	DgcM		P77302	DgcM			P27128	RfaI
P07330	CheB		P07330	CheB		P76298	FlhA		P75908	DgcT		P75908	DgcT			P27129	RfaJ
P07364	CheR		P07364	CheR		Q47153	LfhA		P31129	DgcZ		P31129	DgcZ
P0A964	CheW		P0A964	CheW		P15070	FliN									Module: c-di-GMP catabolism
P07363	CheA		P07363	CheA		P52612	FliI		Module: c-di-GMP catabolism			Module: c-di-GMP catabolism				P76446	PdeN
P0AEC3	ArcB		P0AEC3	ArcB		P76299	FlhB		P76446	PdeN		P76446	PdeN			P77172	PdeF
P30855	EvgS		P30855	EvgS		P0ABX5	FlgG		P77172	PdeF		P77172	PdeF			P76261	PdeD
P39453	TorS		P39453	TorS		P09348	MotA		P76261	PdeD		P76261	PdeD			P76204	YdiV
P39838	RcsD		P39838	RcsD		P0AF06	MotB		P76204	YdiV		P76204	YdiV			P75800	PdeI
P30844	BasS		P30844	BasS		Q47154	LafU		P75800	PdeI		P75800	PdeI			P37646	PdeH
P40719	QseC		P40719	QseC		P0AEM4	FlgM		P37646	PdeH		P37646	PdeH			P75990	BluF
P07658	FdhF					P52613	FliJ		P75990	BluF		P75990	BluF			P75995	PdeG
P76192	YdhV		Module: Flagellum			P22586	FliO		P75995	PdeG		P75995	PdeG			P13518	CsrD
P08372	PpdC		P04949	FliC		P31068	FliH		P13518	CsrD		P13518	CsrD			P23842	PdeA
P36647	PpdD		P29744	FlgL					P23842	PdeA		P23842	PdeA			P37649	PdeK
P0AEA2	CsgG		P0ABX8	FliL		Module: c-di-GMP Signaling			P37649	PdeK		P37649	PdeK
P27128	RfaI		P26608	FliS		P76446	PdeN									Module: c-di-GMP synthesis
P27129	RfaJ		P33235	FlgK		P77172	PdeF		Module: Flagellar rotation			Module: Flagellar rotation				P0AA89	DosC
P0A9H9	CheZ		P52614	FliK		P76261	PdeD		P09348	MotA		P09348	MotA			P0AAP1	DgcC
P24216	FliD		P75937	FlgE		P76204	YdiV		P0AF06	MotB		P0AF06	MotB			P76330	DgcQ
P76010	YcgR		P0A6S0	FlgH		P75800	PdeI									P77302	DgcM
P04949	FliC		P0A6S3	FlgI		P37646	PdeH		Module: Flagellar filament			Module: Flagellar filament				P75908	DgcT
P29744	FlgL		P75933	FlgA		P75990	BluF		P04949	FliC		P04949	FliC			P31129	DgcZ
P0ABX8	FliL		P75938	FlgF		P75995	PdeG		P29744	FlgL		P29744	FlgL
P26608	FliS		P75942	FlgJ		P13518	CsrD									Module: Flagellar filament
P33235	FlgK		P06974	FliM		P23842	PdeA		Module: Flagellar basal body/rod/hook			Module: Flagellar torque transmission				P04949	FliC
P52614	FliK		P75936	FlgD		P37649	PdeK		P26608	FliS		P0A6S0	FlgH			P29744	FlgL
P75937	FlgE		P0ABZ1	FliG		P0AA89	DosC		P0A6S0	FlgH		P0A6S3	FlgI
P0A6S0	FlgH		P0A8T5	FliE		P0AAP1	DgcC		P0A6S3	FlgI		P75938	FlgF			Module: Flagellar rod
P0A6S3	FlgI		P0ABW9	FlgB		P76330	DgcQ		P75933	FlgA		P75942	FlgJ			P75938	FlgF
P75933	FlgA		P0ABX2	FlgC		P77302	DgcM		P75938	FlgF						P75942	FlgJ
P75938	FlgF		P0AC05	FliP		P75908	DgcT		P75942	FlgJ		Module: Flagellar Basal body
P75942	FlgJ		P33135	FliR		P31129	DgcZ		P06974	FliM		P75936	FlgD			Module: Flagellar L- and P-rings
P06974	FliM		P0AC07	FliQ					P75936	FlgD		P0A8T5	FliE			P0A6S0	FlgH
P75936	FlgD		P25798	FliF		Module: Chemotaxis Signaling			P0ABZ1	FliG		P25798	FliF			P0A6S3	FlgI
P0ABZ1	FliG		P76298	FlhA		P02942	Tsr		P0A8T5	FliE		P76299	FlhB
P0A8T5	FliE		Q47153	LfhA		P50466	Aer		P0AC07	FliQ		P06974	FliM			Module: Flagellar rotation
P0ABW9	FlgB		P15070	FliN		P05704	Trg		P25798	FliF		P0ABZ1	FliG			P09348	MotA
P0ABX2	FlgC		P52612	FliI		P07017	Tar		Q47153	LfhA		P0AC07	FliQ			P0AF06	MotB
P0AC05	FliP		P76299	FlhB		P07018	Tap		P15070	FliN		P52612	FliI			Q47154	LafU
P33135	FliR		P0ABX5	FlgG		P07330	CheB		P52612	FliI		P0ABW9	FlgB
P0AC07	FliQ		P09348	MotA		P07364	CheR		P0ABX5	FlgG		P0AC05	FliP			Module: Flagellar basal body
P25798	FliF		P0AF06	MotB		P0A964	CheW		P0AEM4	FlgM		P33135	FliR			P06974	FliM
P76298	FlhA		Q47154	LafU		P07363	CheA		P0ABW9	FlgB		P76298	FlhA			P75936	FlgD
Q47153	LfhA		P0AEM4	FlgM		P0AEC3	ArcB		P0AC05	FliP		P0ABX2	FlgC			P0ABZ1	FliG
P15070	FliN		P52613	FliJ		P30855	EvgS		P33135	FliR						P0A8T5	FliE
P52612	FliI		P22586	FliO		P39453	TorS		P76298	FlhA		Module: LPS Biosynthesis				P0ABW9	FlgB
P76299	FlhB		P31068	FliH		P39838	RcsD		P76299	FlhB		P27128	RfaI			P0ABX2	FlgC
P0ABX5	FlgG					P30844	BasS		P0ABX2	FlgC		P27129	RfaJ			P0AC05	FliP
P09348	MotA		Module: Oxidoreductase													P33135	FliR
P0AF06	MotB		P07658	FdhF		Module: LPS Biosynthesis			Module: LPS Biosynthesis							P0AC07	FliQ
Q47154	LafU		P76192	YdhV		P27128	RfaI		P27128	RfaI						P25798	FliF
P0AEM4	FlgM					P27129	RfaJ		P27129	RfaJ						P76298	FlhA
P52613	FliJ															Q47153	LfhA
P22586	FliO		Module: Methylation activity													P52612	FliI
P31068	FliH		P08372	PpdC												P76299	FlhB
			P36647	PpdD
			Module: LPS Biosynthesis
			P27128	RfaI
			P27129	RfaJ

## Sheet: SD50
	PdeN	PdeF	PdeD	YdiV	PdeI	PdeH	BluF	PdeG	CsrD	PdeA	PdeK	DosC	DgcC	DgcQ	DgcM	DgcT	DgcZ	Tsr	Aer	Trg	Tar	Tap	CheB	CheR	CheW	CheA	ArcB	EvgS	TorS	RcsD	BasS	QseC	FdhF	YdhV	PpdC	PpdD	CsgG	RfaI	RfaJ	CheZ	FliD	YcgR	FliC	FlgL	FliL	FliS	FlgK	FliK	FlgE
PdeN	1	1	1	1	1	1	1	1	1	1	1	1	1	1	1	1	1	1	1	1	1	1	1	1	1	1	1	1	1	1	1	1	1	1	1	1	1	1	1	1	1	1	1	1	1	1	1	1	1
PdeF	1	1	1	1	1	1	1	1	1	1	1	1	1	1	1	1	1	1	1	1	1	1	1	1	1	1	1	1	1	1	1	1	1	1	1	1	1	1	1	1	1	1	1	1	1	1	1	1	1
PdeD	1	1	1	1	1	1	1	1	1	1	1	1	1	1	1	1	1	1	1	1	1	1	1	1	1	1	1	1	1	1	1	1	1	1	1	1	1	1	1	1	1	1	1	1	1	1	1	1	1
YdiV	1	1	1	1	1	1	1	1	1	1	1	1	1	1	1	1	1	1	1	1	1	1	1	1	1	1	1	1	1	1	1	1	1	1	1	1	1	1	1	1	1	1	1	1	1	1	1	1	1
PdeI	1	1	1	1	1	1	1	1	1	1	1	1	1	1	1	1	1	1	1	1	1	1	1	1	1	1	1	1	1	1	1	1	1	1	1	1	1	1	1	1	1	1	1	1	1	1	1	1	1
PdeH	1	1	1	1	1	1	1	1	1	1	1	1	1	1	1	1	1	1	1	1	1	1	1	1	1	1	1	1	1	1	1	1	1	1	1	1	1	1	1	1	1	1	1	1	1	1	1	1	1
BluF	1	1	1	1	1	1	1	1	1	1	1	1	1	1	1	1	1	1	1	1	1	1	1	1	1	1	1	1	1	1	1	1	1	1	1	1	1	1	1	1	1	1	1	1	1	1	1	1	1
PdeG	1	1	1	1	1	1	1	1	1	1	1	1	1	1	1	1	1	1	1	1	1	1	1	1	1	1	1	1	1	1	1	1	1	1	1	1	1	1	1	1	1	1	1	1	1	1	1	1	1
CsrD	1	1	1	1	1	1	1	1	1	1	1	1	1	1	1	1	1	1	1	1	1	1	1	1	1	1	1	1	1	1	1	1	1	1	1	1	1	1	1	1	1	1	1	1	1	1	1	1	1
PdeA	1	1	1	1	1	1	1	1	1	1	1	1	1	1	1	1	1	1	1	1	1	1	1	1	1	1	1	1	1	1	1	1	1	1	1	1	1	1	1	1	1	1	1	1	1	1	1	1	1
PdeK	1	1	1	1	1	1	1	1	1	1	1	1	1	1	1	1	1	1	1	1	1	1	1	1	1	1	1	1	1	1	1	1	1	1	1	1	1	1	1	1	1	1	1	1	1	1	1	1	1
DosC	1	1	1	1	1	1	1	1	1	1	1	1	1	1	1	1	1	1	1	1	1	1	1	1	1	1	1	1	1	1	1	1	1	1	1	1	1	1	1	1	1	1	1	1	1	1	1	1	1
DgcC	1	1	1	1	1	1	1	1	1	1	1	1	1	1	1	1	1	1	1	1	1	1	1	1	1	1	1	1	1	1	1	1	1	1	1	1	1	1	1	1	1	1	1	1	1	1	1	1	1
DgcQ	1	1	1	1	1	1	1	1	1	1	1	1	1	1	1	1	1	1	1	1	1	1	1	1	1	1	1	1	1	1	1	1	1	1	1	1	1	1	1	1	1	1	1	1	1	1	1	1	1
DgcM	1	1	1	1	1	1	1	1	1	1	1	1	1	1	1	1	1	1	1	1	1	1	1	1	1	1	1	1	1	1	1	1	1	1	1	1	1	1	1	1	1	1	1	1	1	1	1	1	1
DgcT	1	1	1	1	1	1	1	1	1	1	1	1	1	1	1	1	1	1	1	1	1	1	1	1	1	1	1	1	1	1	1	1	1	1	1	1	1	1	1	1	1	1	1	1	1	1	1	1	1
DgcZ	1	1	1	1	1	1	1	1	1	1	1	1	1	1	1	1	1	1	1	1	1	1	1	1	1	1	1	1	1	1	1	1	1	1	1	1	1	1	1	1	1	1	1	1	1	1	1	1	1
Tsr	1	1	1	1	1	1	1	1	1	1	1	1	1	1	1	1	1	1	1	1	1	1	1	1	1	1	1	1	1	1	1	1	1	1	1	1	1	1	1	1	1	1	1	1	1	1	1	1	1
Aer	1	1	1	1	1	1	1	1	1	1	1	1	1	1	1	1	1	1	1	1	1	1	1	1	1	1	1	1	1	1	1	1	1	1	1	1	1	1	1	1	1	1	1	1	1	1	1	1	1
Trg	1	1	1	1	1	1	1	1	1	1	1	1	1	1	1	1	1	1	1	1	1	1	1	1	1	1	1	1	1	1	1	1	1	1	1	1	1	1	1	1	1	1	1	1	1	1	1	1	1
Tar	1	1	1	1	1	1	1	1	1	1	1	1	1	1	1	1	1	1	1	1	1	1	1	1	1	1	1	1	1	1	1	1	1	1	1	1	1	1	1	1	1	1	1	1	1	1	1	1	1
Tap	1	1	1	1	1	1	1	1	1	1	1	1	1	1	1	1	1	1	1	1	1	1	1	1	1	1	1	1	1	1	1	1	1	1	1	1	1	1	1	1	1	1	1	1	1	1	1	1	1
CheB	1	1	1	1	1	1	1	1	1	1	1	1	1	1	1	1	1	1	1	1	1	1	1	1	1	1	1	1	1	1	1	1	1	1	1	1	1	1	1	1	1	1	1	1	1	1	1	1	1
CheR	1	1	1	1	1	1	1	1	1	1	1	1	1	1	1	1	1	1	1	1	1	1	1	1	1	1	1	1	1	1	1	1	1	1	1	1	1	1	1	1	1	1	1	1	1	1	1	1	1
CheW	1	1	1	1	1	1	1	1	1	1	1	1	1	1	1	1	1	1	1	1	1	1	1	1	1	1	1	1	1	1	1	1	1	1	1	1	1	1	1	1	1	1	1	1	1	1	1	1	1
CheA	1	1	1	1	1	1	1	1	1	1	1	1	1	1	1	1	1	1	1	1	1	1	1	1	1	1	1	1	1	1	1	1	1	1	1	1	1	1	1	1	1	1	1	1	1	1	1	1	1
ArcB	1	1	1	1	1	1	1	1	1	1	1	1	1	1	1	1	1	1	1	1	1	1	1	1	1	1	1	1	1	1	1	1	1	1	1	1	1	1	1	1	1	1	1	1	1	1	1	1	1
EvgS	1	1	1	1	1	1	1	1	1	1	1	1	1	1	1	1	1	1	1	1	1	1	1	1	1	1	1	1	1	1	1	1	1	1	1	1	1	1	1	1	1	1	1	1	1	1	1	1	1
TorS	1	1	1	1	1	1	1	1	1	1	1	1	1	1	1	1	1	1	1	1	1	1	1	1	1	1	1	1	1	1	1	1	1	1	1	1	1	1	1	1	1	1	1	1	1	1	1	1	1
RcsD	1	1	1	1	1	1	1	1	1	1	1	1	1	1	1	1	1	1	1	1	1	1	1	1	1	1	1	1	1	1	1	1	1	1	1	1	1	1	1	1	1	1	1	1	1	1	1	1	1
BasS	1	1	1	1	1	1	1	1	1	1	1	1	1	1	1	1	1	1	1	1	1	1	1	1	1	1	1	1	1	1	1	1	1	1	1	1	1	1	1	1	1	1	1	1	1	1	1	1	1
QseC	1	1	1	1	1	1	1	1	1	1	1	1	1	1	1	1	1	1	1	1	1	1	1	1	1	1	1	1	1	1	1	1	1	1	1	1	1	1	1	1	1	1	1	1	1	1	1	1	1
FdhF	1	1	1	1	1	1	1	1	1	1	1	1	1	1	1	1	1	1	1	1	1	1	1	1	1	1	1	1	1	1	1	1	1	1	1	1	1	1	1	1	1	1	1	1	1	1	1	1	1
YdhV	1	1	1	1	1	1	1	1	1	1	1	1	1	1	1	1	1	1	1	1	1	1	1	1	1	1	1	1	1	1	1	1	1	1	1	1	1	1	1	1	1	1	1	1	1	1	1	1	1
PpdC	1	1	1	1	1	1	1	1	1	1	1	1	1	1	1	1	1	1	1	1	1	1	1	1	1	1	1	1	1	1	1	1	1	1	1	1	1	1	1	1	1	1	1	1	1	1	1	1	1
PpdD	1	1	1	1	1	1	1	1	1	1	1	1	1	1	1	1	1	1	1	1	1	1	1	1	1	1	1	1	1	1	1	1	1	1	1	1	1	1	1	1	1	1	1	1	1	1	1	1	1
CsgG	1	1	1	1	1	1	1	1	1	1	1	1	1	1	1	1	1	1	1	1	1	1	1	1	1	1	1	1	1	1	1	1	1	1	1	1	1	1	1	1	1	1	1	1	1	1	1	1	1
RfaI	1	1	1	1	1	1	1	1	1	1	1	1	1	1	1	1	1	1	1	1	1	1	1	1	1	1	1	1	1	1	1	1	1	1	1	1	1	1	1	1	1	1	1	1	1	1	1	1	1
RfaJ	1	1	1	1	1	1	1	1	1	1	1	1	1	1	1	1	1	1	1	1	1	1	1	1	1	1	1	1	1	1	1	1	1	1	1	1	1	1	1	1	1	1	1	1	1	1	1	1	1
CheZ	1	1	1	1	1	1	1	1	1	1	1	1	1	1	1	1	1	1	1	1	1	1	1	1	1	1	1	1	1	1	1	1	1	1	1	1	1	1	1	1	1	1	1	1	1	1	1	1	1
FliD	1	1	1	1	1	1	1	1	1	1	1	1	1	1	1	1	1	1	1	1	1	1	1	1	1	1	1	1	1	1	1	1	1	1	1	1	1	1	1	1	1	1	1	1	1	1	1	1	1
YcgR	1	1	1	1	1	1	1	1	1	1	1	1	1	1	1	1	1	1	1	1	1	1	1	1	1	1	1	1	1	1	1	1	1	1	1	1	1	1	1	1	1	1	1	1	1	1	1	1	1
FliC	1	1	1	1	1	1	1	1	1	1	1	1	1	1	1	1	1	1	1	1	1	1	1	1	1	1	1	1	1	1	1	1	1	1	1	1	1	1	1	1	1	1	1	1	1	1	1	1	1
FlgL	1	1	1	1	1	1	1	1	1	1	1	1	1	1	1	1	1	1	1	1	1	1	1	1	1	1	1	1	1	1	1	1	1	1	1	1	1	1	1	1	1	1	1	1	1	1	1	1	1
FliL	1	1	1	1	1	1	1	1	1	1	1	1	1	1	1	1	1	1	1	1	1	1	1	1	1	1	1	1	1	1	1	1	1	1	1	1	1	1	1	1	1	1	1	1	1	1	1	1	1
FliS	1	1	1	1	1	1	1	1	1	1	1	1	1	1	1	1	1	1	1	1	1	1	1	1	1	1	1	1	1	1	1	1	1	1	1	1	1	1	1	1	1	1	1	1	1	1	1	1	1
FlgK	1	1	1	1	1	1	1	1	1	1	1	1	1	1	1	1	1	1	1	1	1	1	1	1	1	1	1	1	1	1	1	1	1	1	1	1	1	1	1	1	1	1	1	1	1	1	1	1	1
FliK	1	1	1	1	1	1	1	1	1	1	1	1	1	1	1	1	1	1	1	1	1	1	1	1	1	1	1	1	1	1	1	1	1	1	1	1	1	1	1	1	1	1	1	1	1	1	1	1	1
FlgE	1	1	1	1	1	1	1	1	1	1	1	1	1	1	1	1	1	1	1	1	1	1	1	1	1	1	1	1	1	1	1	1	1	1	1	1	1	1	1	1	1	1	1	1	1	1	1	1	1
FlgH	1	1	1	1	1	1	1	1	1	1	1	1	1	1	1	1	1	1	1	1	1	1	1	1	1	1	1	1	1	1	1	1	1	1	1	1	1	1	1	1	1	1	1	1	1	1	1	1	1
FlgI	1	1	1	1	1	1	1	1	1	1	1	1	1	1	1	1	1	1	1	1	1	1	1	1	1	1	1	1	1	1	1	1	1	1	1	1	1	1	1	1	1	1	1	1	1	1	1	1	1
FlgA	1	1	1	1	1	1	1	1	1	1	1	1	1	1	1	1	1	1	1	1	1	1	1	1	1	1	1	1	1	1	1	1	1	1	1	1	1	1	1	1	1	1	1	1	1	1	1	1	1
FlgF	1	1	1	1	1	1	1	1	1	1	1	1	1	1	1	1	1	1	1	1	1	1	1	1	1	1	1	1	1	1	1	1	1	1	1	1	1	1	1	1	1	1	1	1	1	1	1	1	1
FlgJ	1	1	1	1	1	1	1	1	1	1	1	1	1	1	1	1	1	1	1	1	1	1	1	1	1	1	1	1	1	1	1	1	1	1	1	1	1	1	1	1	1	1	1	1	1	1	1	1	1
FliM	1	1	1	1	1	1	1	1	1	1	1	1	1	1	1	1	1	1	1	1	1	1	1	1	1	1	1	1	1	1	1	1	1	1	1	1	1	1	1	1	1	1	1	1	1	1	1	1	1
FlgD	1	1	1	1	1	1	1	1	1	1	1	1	1	1	1	1	1	1	1	1	1	1	1	1	1	1	1	1	1	1	1	1	1	1	1	1	1	1	1	1	1	1	1	1	1	1	1	1	1
FliG	1	1	1	1	1	1	1	1	1	1	1	1	1	1	1	1	1	1	1	1	1	1	1	1	1	1	1	1	1	1	1	1	1	1	1	1	1	1	1	1	1	1	1	1	1	1	1	1	1
FliE	1	1	1	1	1	1	1	1	1	1	1	1	1	1	1	1	1	1	1	1	1	1	1	1	1	1	1	1	1	1	1	1	1	1	1	1	1	1	1	1	1	1	1	1	1	1	1	1	1
FlgB	1	1	1	1	1	1	1	1	1	1	1	1	1	1	1	1	1	1	1	1	1	1	1	1	1	1	1	1	1	1	1	1	1	1	1	1	1	1	1	1	1	1	1	1	1	1	1	1	1
FlgC	1	1	1	1	1	1	1	1	1	1	1	1	1	1	1	1	1	1	1	1	1	1	1	1	1	1	1	1	1	1	1	1	1	1	1	1	1	1	1	1	1	1	1	1	1	1	1	1	1
FliP	1	1	1	1	1	1	1	1	1	1	1	1	1	1	1	1	1	1	1	1	1	1	1	1	1	1	1	1	1	1	1	1	1	1	1	1	1	1	1	1	1	1	1	1	1	1	1	1	1
FliR	1	1	1	1	1	1	1	1	1	1	1	1	1	1	1	1	1	1	1	1	1	1	1	1	1	1	1	1	1	1	1	1	1	1	1	1	1	1	1	1	1	1	1	1	1	1	1	1	1
FliQ	1	1	1	1	1	1	1	1	1	1	1	1	1	1	1	1	1	1	1	1	1	1	1	1	1	1	1	1	1	1	1	1	1	1	1	1	1	1	1	1	1	1	1	1	1	1	1	1	1
FliF	1	1	1	1	1	1	1	1	1	1	1	1	1	1	1	1	1	1	1	1	1	1	1	1	1	1	1	1	1	1	1	1	1	1	1	1	1	1	1	1	1	1	1	1	1	1	1	1	1
FlhA	1	1	1	1	1	1	1	1	1	1	1	1	1	1	1	1	1	1	1	1	1	1	1	1	1	1	1	1	1	1	1	1	1	1	1	1	1	1	1	1	1	1	1	1	1	1	1	1	1
LfhA	1	1	1	1	1	1	1	1	1	1	1	1	1	1	1	1	1	1	1	1	1	1	1	1	1	1	1	1	1	1	1	1	1	1	1	1	1	1	1	1	1	1	1	1	1	1	1	1	1
FliN	1	1	1	1	1	1	1	1	1	1	1	1	1	1	1	1	1	1	1	1	1	1	1	1	1	1	1	1	1	1	1	1	1	1	1	1	1	1	1	1	1	1	1	1	1	1	1	1	1
FliI	1	1	1	1	1	1	1	1	1	1	1	1	1	1	1	1	1	1	1	1	1	1	1	1	1	1	1	1	1	1	1	1	1	1	1	1	1	1	1	1	1	1	1	1	1	1	1	1	1
FlhB	1	1	1	1	1	1	1	1	1	1	1	1	1	1	1	1	1	1	1	1	1	1	1	1	1	1	1	1	1	1	1	1	1	1	1	1	1	1	1	1	1	1	1	1	1	1	1	1	1
FlgG	1	1	1	1	1	1	1	1	1	1	1	1	1	1	1	1	1	1	1	1	1	1	1	1	1	1	1	1	1	1	1	1	1	1	1	1	1	1	1	1	1	1	1	1	1	1	1	1	1
MotA	1	1	1	1	1	1	1	1	1	1	1	1	1	1	1	1	1	1	1	1	1	1	1	1	1	1	1	1	1	1	1	1	1	1	1	1	1	1	1	1	1	1	1	1	1	1	1	1	1
MotB	1	1	1	1	1	1	1	1	1	1	1	1	1	1	1	1	1	1	1	1	1	1	1	1	1	1	1	1	1	1	1	1	1	1	1	1	1	1	1	1	1	1	1	1	1	1	1	1	1
LafU	1	1	1	1	1	1	1	1	1	1	1	1	1	1	1	1	1	1	1	1	1	1	1	1	1	1	1	1	1	1	1	1	1	1	1	1	1	1	1	1	1	1	1	1	1	1	1	1	1
FlgM	1	1	1	1	1	1	1	1	1	1	1	1	1	1	1	1	1	1	1	1	1	1	1	1	1	1	1	1	1	1	1	1	1	1	1	1	1	1	1	1	1	1	1	1	1	1	1	1	1
FliJ	1	1	1	1	1	1	1	1	1	1	1	1	1	1	1	1	1	1	1	1	1	1	1	1	1	1	1	1	1	1	1	1	1	1	1	1	1	1	1	1	1	1	1	1	1	1	1	1	1
FliO	1	1	1	1	1	1	1	1	1	1	1	1	1	1	1	1	1	1	1	1	1	1	1	1	1	1	1	1	1	1	1	1	1	1	1	1	1	1	1	1	1	1	1	1	1	1	1	1	1
FliH	1	1	1	1	1	1	1	1	1	1	1	1	1	1	1	1	1	1	1	1	1	1	1	1	1	1	1	1	1	1	1	1	1	1	1	1	1	1	1	1	1	1	1	1	1	1	1	1	1
[truncated: 28 more columns]

## Sheet: SD300
	PdeN	PdeF	PdeD	YdiV	PdeI	PdeH	BluF	PdeG	CsrD	PdeA	PdeK	DosC	DgcC	DgcQ	DgcM	DgcT	DgcZ	Tsr	Aer	Trg	Tar	Tap	CheB	CheR	CheW	CheA	ArcB	EvgS	TorS	RcsD	BasS	QseC	FdhF	YdhV	PpdC	PpdD	CsgG	RfaI	RfaJ	CheZ	FliD	YcgR	FliC	FlgL	FliL	FliS	FlgK	FliK	FlgE
PdeN	1	1	1	1	1	1	1	1	1	1	1	1	1	1	1	1	1	0	0	0	0	0	0	0	0	0	0	0	0	0	0	0	0	0	0	0	0	0	0	0	0	0	0	0	0	0	0	0	0
PdeF	1	1	1	1	1	1	1	1	1	1	1	1	1	1	1	1	1	0	0	0	0	0	0	0	0	0	0	0	0	0	0	0	0	0	0	0	0	0	0	0	0	0	0	0	0	0	0	0	0
PdeD	1	1	1	1	1	1	1	1	1	1	1	1	1	1	1	1	1	0	0	0	0	0	0	0	0	0	0	0	0	0	0	0	0	0	0	0	0	0	0	0	0	0	0	0	0	0	0	0	0
YdiV	1	1	1	1	1	1	1	1	1	1	1	1	1	1	1	1	1	0	0	0	0	0	0	0	0	0	0	0	0	0	0	0	0	0	0	0	0	0	0	0	0	0	0	0	0	0	0	0	0
PdeI	1	1	1	1	1	1	1	1	1	1	1	1	1	1	1	1	1	0	0	0	0	0	0	0	0	0	0	0	0	0	0	0	0	0	0	0	0	0	0	0	0	0	0	0	0	0	0	0	0
PdeH	1	1	1	1	1	1	1	1	1	1	1	1	1	1	1	1	1	0	0	0	0	0	0	0	0	0	0	0	0	0	0	0	0	0	0	0	0	0	0	0	0	0	0	0	0	0	0	0	0
BluF	1	1	1	1	1	1	1	1	1	1	1	1	1	1	1	1	1	0	0	0	0	0	0	0	0	0	0	0	0	0	0	0	0	0	0	0	0	0	0	0	0	0	0	0	0	0	0	0	0
PdeG	1	1	1	1	1	1	1	1	1	1	1	1	1	1	1	1	1	0	0	0	0	0	0	0	0	0	0	0	0	0	0	0	0	0	0	0	0	0	0	0	0	0	0	0	0	0	0	0	0
CsrD	1	1	1	1	1	1	1	1	1	1	1	1	1	1	1	1	1	0	0	0	0	0	0	0	0	0	0	0	0	0	0	0	0	0	0	0	0	0	0	0	0	0	0	0	0	0	0	0	0
PdeA	1	1	1	1	1	1	1	1	1	1	1	1	1	1	1	1	1	0	0	0	0	0	0	0	0	0	0	0	0	0	0	0	0	0	0	0	0	0	0	0	0	0	0	0	0	0	0	0	0
PdeK	1	1	1	1	1	1	1	1	1	1	1	1	1	1	1	1	1	0	0	0	0	0	0	0	0	0	0	0	0	0	0	0	0	0	0	0	0	0	0	0	0	0	0	0	0	0	0	0	0
DosC	1	1	1	1	1	1	1	1	1	1	1	1	1	1	1	1	1	0	0	0	0	0	0	0	0	0	0	0	0	0	0	0	0	0	0	0	0	0	0	0	0	0	0	0	0	0	0	0	0
DgcC	1	1	1	1	1	1	1	1	1	1	1	1	1	1	1	1	1	0	0	0	0	0	0	0	0	0	0	0	0	0	0	0	0	0	0	0	0	0	0	0	0	0	0	0	0	0	0	0	0
DgcQ	1	1	1	1	1	1	1	1	1	1	1	1	1	1	1	1	1	0	0	0	0	0	0	0	0	0	0	0	0	0	0	0	0	0	0	0	0	0	0	0	0	0	0	0	0	0	0	0	0
DgcM	1	1	1	1	1	1	1	1	1	1	1	1	1	1	1	1	1	0	0	0	0	0	0	0	0	0	0	0	0	0	0	0	0	0	0	0	0	0	0	0	0	0	0	0	0	0	0	0	0
DgcT	1	1	1	1	1	1	1	1	1	1	1	1	1	1	1	1	1	0	0	0	0	0	0	0	0	0	0	0	0	0	0	0	0	0	0	0	0	0	0	0	0	0	0	0	0	0	0	0	0
DgcZ	1	1	1	1	1	1	1	1	1	1	1	1	1	1	1	1	1	0	0	0	0	0	0	0	0	0	0	0	0	0	0	0	0	0	0	0	0	0	0	0	0	0	0	0	0	0	0	0	0
Tsr	0	0	0	0	0	0	0	0	0	0	0	0	0	0	0	0	0	1	1	1	1	1	0	0	1	0	0	0	0	0	0	0	0	0	0	0	0	0	0	0	0	0	0	0	0	0	0	0	0
Aer	0	0	0	0	0	0	0	0	0	0	0	0	0	0	0	0	0	1	1	1	1	1	0	0	1	0	0	0	0	0	0	0	0	0	0	0	0	0	0	0	0	0	0	0	0	0	0	0	0
Trg	0	0	0	0	0	0	0	0	0	0	0	0	0	0	0	0	0	1	1	1	1	1	0	0	1	0	0	0	0	0	0	0	0	0	0	0	0	0	0	0	0	0	0	0	0	0	0	0	0
Tar	0	0	0	0	0	0	0	0	0	0	0	0	0	0	0	0	0	1	1	1	1	1	0	0	1	0	0	0	0	0	0	0	0	0	0	0	0	0	0	0	0	0	0	0	0	0	0	0	0
Tap	0	0	0	0	0	0	0	0	0	0	0	0	0	0	0	0	0	1	1	1	1	1	0	0	1	0	0	0	0	0	0	0	0	0	0	0	0	0	0	0	0	0	0	0	0	0	0	0	0
CheB	0	0	0	0	0	0	0	0	0	0	0	0	0	0	0	0	0	0	0	0	0	0	1	1	1	1	1	1	1	0	0	0	0	0	0	0	0	0	0	0	0	0	0	0	0	0	0	0	0
CheR	0	0	0	0	0	0	0	0	0	0	0	0	0	0	0	0	0	0	0	0	0	0	1	1	1	1	1	1	1	1	0	0	0	0	0	0	0	0	0	0	0	0	0	0	0	0	0	0	0
CheW	0	0	0	0	0	0	0	0	0	0	0	0	0	0	0	0	0	1	1	1	1	1	1	1	1	1	0	0	0	0	0	0	0	0	0	0	0	0	0	0	0	0	0	0	0	0	0	0	0
CheA	0	0	0	0	0	0	0	0	0	0	0	0	0	0	0	0	0	0	0	0	0	0	1	1	1	1	1	1	1	1	0	0	0	0	0	0	0	0	0	0	0	0	0	0	0	0	0	0	0
ArcB	0	0	0	0	0	0	0	0	0	0	0	0	0	0	0	0	0	0	0	0	0	0	1	1	0	1	1	1	1	1	1	1	0	0	0	0	0	0	0	0	0	0	0	0	0	0	0	0	0
EvgS	0	0	0	0	0	0	0	0	0	0	0	0	0	0	0	0	0	0	0	0	0	0	1	1	0	1	1	1	1	1	1	1	0	0	0	0	0	0	0	0	0	0	0	0	0	0	0	0	0
TorS	0	0	0	0	0	0	0	0	0	0	0	0	0	0	0	0	0	0	0	0	0	0	1	1	0	1	1	1	1	1	1	1	0	0	0	0	0	0	0	0	0	0	0	0	0	0	0	0	0
RcsD	0	0	0	0	0	0	0	0	0	0	0	0	0	0	0	0	0	0	0	0	0	0	0	1	0	1	1	1	1	1	1	1	0	0	0	0	0	0	0	0	0	0	0	0	0	0	0	0	0
BasS	0	0	0	0	0	0	0	0	0	0	0	0	0	0	0	0	0	0	0	0	0	0	0	0	0	0	1	1	1	1	1	1	0	0	0	0	0	0	0	0	0	0	0	0	0	0	0	0	0
QseC	0	0	0	0	0	0	0	0	0	0	0	0	0	0	0	0	0	0	0	0	0	0	0	0	0	0	1	1	1	1	1	1	0	0	0	0	0	0	0	0	0	0	0	0	0	0	0	0	0
FdhF	0	0	0	0	0	0	0	0	0	0	0	0	0	0	0	0	0	0	0	0	0	0	0	0	0	0	0	0	0	0	0	0	1	0	0	0	0	0	0	0	0	0	0	0	0	0	0	0	0
YdhV	0	0	0	0	0	0	0	0	0	0	0	0	0	0	0	0	0	0	0	0	0	0	0	0	0	0	0	0	0	0	0	0	0	1	0	0	0	0	0	0	0	0	0	0	0	0	0	0	0
PpdC	0	0	0	0	0	0	0	0	0	0	0	0	0	0	0	0	0	0	0	0	0	0	0	0	0	0	0	0	0	0	0	0	0	0	1	0	0	0	0	0	0	0	0	0	0	0	0	0	0
PpdD	0	0	0	0	0	0	0	0	0	0	0	0	0	0	0	0	0	0	0	0	0	0	0	0	0	0	0	0	0	0	0	0	0	0	0	1	0	0	0	0	0	0	0	0	0	0	0	0	0
CsgG	0	0	0	0	0	0	0	0	0	0	0	0	0	0	0	0	0	0	0	0	0	0	0	0	0	0	0	0	0	0	0	0	0	0	0	0	1	0	0	0	0	0	0	0	0	0	0	0	0
RfaI	0	0	0	0	0	0	0	0	0	0	0	0	0	0	0	0	0	0	0	0	0	0	0	0	0	0	0	0	0	0	0	0	0	0	0	0	0	1	1	0	0	0	0	0	0	0	0	0	0
RfaJ	0	0	0	0	0	0	0	0	0	0	0	0	0	0	0	0	0	0	0	0	0	0	0	0	0	0	0	0	0	0	0	0	0	0	0	0	0	1	1	0	0	0	0	0	0	0	0	0	0
CheZ	0	0	0	0	0	0	0	0	0	0	0	0	0	0	0	0	0	0	0	0	0	0	0	0	0	0	0	0	0	0	0	0	0	0	0	0	0	0	0	1	0	0	0	0	0	0	0	0	0
FliD	0	0	0	0	0	0	0	0	0	0	0	0	0	0	0	0	0	0	0	0	0	0	0	0	0	0	0	0	0	0	0	0	0	0	0	0	0	0	0	0	1	0	0	0	0	0	0	0	0
YcgR	0	0	0	0	0	0	0	0	0	0	0	0	0	0	0	0	0	0	0	0	0	0	0	0	0	0	0	0	0	0	0	0	0	0	0	0	0	0	0	0	0	1	0	0	0	0	0	0	0
FliC	0	0	0	0	0	0	0	0	0	0	0	0	0	0	0	0	0	0	0	0	0	0	0	0	0	0	0	0	0	0	0	0	0	0	0	0	0	0	0	0	0	0	1	1	0	1	1	0	0
FlgL	0	0	0	0	0	0	0	0	0	0	0	0	0	0	0	0	0	0	0	0	0	0	0	0	0	0	0	0	0	0	0	0	0	0	0	0	0	0	0	0	0	0	1	1	0	1	1	0	0
FliL	0	0	0	0	0	0	0	0	0	0	0	0	0	0	0	0	0	0	0	0	0	0	0	0	0	0	0	0	0	0	0	0	0	0	0	0	0	0	0	0	0	0	0	0	1	0	0	1	0
FliS	0	0	0	0	0	0	0	0	0	0	0	0	0	0	0	0	0	0	0	0	0	0	0	0	0	0	0	0	0	0	0	0	0	0	0	0	0	0	0	0	0	0	1	1	0	1	1	0	0
FlgK	0	0	0	0	0	0	0	0	0	0	0	0	0	0	0	0	0	0	0	0	0	0	0	0	0	0	0	0	0	0	0	0	0	0	0	0	0	0	0	0	0	0	1	1	0	1	1	1	0
FliK	0	0	0	0	0	0	0	0	0	0	0	0	0	0	0	0	0	0	0	0	0	0	0	0	0	0	0	0	0	0	0	0	0	0	0	0	0	0	0	0	0	0	0	0	1	0	1	1	0
FlgE	0	0	0	0	0	0	0	0	0	0	0	0	0	0	0	0	0	0	0	0	0	0	0	0	0	0	0	0	0	0	0	0	0	0	0	0	0	0	0	0	0	0	0	0	0	0	0	0	1
FlgH	0	0	0	0	0	0	0	0	0	0	0	0	0	0	0	0	0	0	0	0	0	0	0	0	0	0	0	0	0	0	0	0	0	0	0	0	0	0	0	0	0	0	0	0	1	0	1	1	0
FlgI	0	0	0	0	0	0	0	0	0	0	0	0	0	0	0	0	0	0	0	0	0	0	0	0	0	0	0	0	0	0	0	0	0	0	0	0	0	0	0	0	0	0	1	1	1	0	1	1	1
FlgA	0	0	0	0	0	0	0	0	0	0	0	0	0	0	0	0	0	0	0	0	0	0	0	0	0	0	0	0	0	0	0	0	0	0	0	0	0	0	0	0	0	0	0	0	0	0	0	0	0
FlgF	0	0	0	0	0	0	0	0	0	0	0	0	0	0	0	0	0	0	0	0	0	0	0	0	0	0	0	0	0	0	0	0	0	0	0	0	0	0	0	0	0	0	1	1	0	1	1	1	0
FlgJ	0	0	0	0	0	0	0	0	0	0	0	0	0	0	0	0	0	0	0	0	0	0	0	0	0	0	0	0	0	0	0	0	0	0	0	0	0	0	0	0	0	0	0	0	0	0	0	1	0
FliM	0	0	0	0	0	0	0	0	0	0	0	0	0	0	0	0	0	0	0	0	0	0	0	0	0	0	0	0	0	0	0	0	0	0	0	0	0	0	0	0	0	0	1	1	1	1	1	1	0
FlgD	0	0	0	0	0	0	0	0	0	0	0	0	0	0	0	0	0	0	0	0	0	0	0	0	0	0	0	0	0	0	0	0	0	0	0	0	0	0	0	0	0	0	1	1	1	1	1	1	1
FliG	0	0	0	0	0	0	0	0	0	0	0	0	0	0	0	0	0	0	0	0	0	0	0	0	0	0	0	0	0	0	0	0	0	0	0	0	0	0	0	0	0	0	1	1	1	1	0	1	0
FliE	0	0	0	0	0	0	0	0	0	0	0	0	0	0	0	0	0	0	0	0	0	0	0	0	0	0	0	0	0	0	0	0	0	0	0	0	0	0	0	0	0	0	1	1	1	1	1	1	0
FlgB	0	0	0	0	0	0	0	0	0	0	0	0	0	0	0	0	0	0	0	0	0	0	0	0	0	0	0	0	0	0	0	0	0	0	0	0	0	0	0	0	0	0	1	1	1	1	1	1	1
FlgC	0	0	0	0	0	0	0	0	0	0	0	0	0	0	0	0	0	0	0	0	0	0	0	0	0	0	0	0	0	0	0	0	0	0	0	0	0	0	0	0	0	0	1	1	1	1	1	1	0
FliP	0	0	0	0	0	0	0	0	0	0	0	0	0	0	0	0	0	0	0	0	0	0	0	0	0	0	0	0	0	0	0	0	0	0	0	0	0	0	0	0	0	0	1	1	1	1	1	1	1
FliR	0	0	0	0	0	0	0	0	0	0	0	0	0	0	0	0	0	0	0	0	0	0	0	0	0	0	0	0	0	0	0	0	0	0	0	0	0	0	0	0	0	0	1	1	1	1	1	1	0
FliQ	0	0	0	0	0	0	0	0	0	0	0	0	0	0	0	0	0	0	0	0	0	0	0	0	0	0	0	0	0	0	0	0	0	0	0	0	0	0	0	0	0	0	1	1	1	1	1	1	0
FliF	0	0	0	0	0	0	0	0	0	0	0	0	0	0	0	0	0	0	0	0	0	0	0	0	0	0	0	0	0	0	0	0	0	0	0	0	0	0	0	0	0	0	1	1	1	1	1	1	1
FlhA	0	0	0	0	0	0	0	0	0	0	0	0	0	0	0	0	0	0	0	0	0	0	0	0	0	0	0	0	0	0	0	0	0	0	0	0	0	0	0	0	0	0	1	1	1	1	1	1	1
LfhA	0	0	0	0	0	0	0	0	0	0	0	0	0	0	0	0	0	0	0	0	0	0	0	0	0	0	0	0	0	0	0	0	0	0	0	0	0	0	0	0	0	0	1	1	1	1	1	1	1
FliN	0	0	0	0	0	0	0	0	0	0	0	0	0	0	0	0	0	0	0	0	0	0	0	0	0	0	0	0	0	0	0	0	0	0	0	0	0	0	0	0	0	0	0	0	0	0	0	0	0
FliI	0	0	0	0	0	0	0	0	0	0	0	0	0	0	0	0	0	0	0	0	0	0	0	0	0	0	0	0	0	0	0	0	0	0	0	0	0	0	0	0	0	0	0	0	0	0	0	0	0
FlhB	0	0	0	0	0	0	0	0	0	0	0	0	0	0	0	0	0	0	0	0	0	0	0	0	0	0	0	0	0	0	0	0	0	0	0	0	0	0	0	0	0	0	1	1	0	1	1	0	0
FlgG	0	0	0	0	0	0	0	0	0	0	0	0	0	0	0	0	0	0	0	0	0	0	0	0	0	0	0	0	0	0	0	0	0	0	0	0	0	0	0	0	0	0	1	1	0	0	1	0	0
MotA	0	0	0	0	0	0	0	0	0	0	0	0	0	0	0	0	0	0	0	0	0	0	0	0	0	0	0	0	0	0	0	0	0	0	0	0	0	0	0	0	0	0	1	1	0	0	0	0	0
MotB	0	0	0	0	0	0	0	0	0	0	0	0	0	0	0	0	0	0	0	0	0	0	0	0	0	0	0	0	0	0	0	0	0	0	0	0	0	0	0	0	0	0	0	0	0	0	0	0	0
LafU	0	0	0	0	0	0	0	0	0	0	0	0	0	0	0	0	0	0	0	0	0	0	0	0	0	0	0	0	0	0	0	0	0	0	0	0	0	0	0	0	0	0	0	0	0	0	0	0	0
FlgM	0	0	0	0	0	0	0	0	0	0	0	0	0	0	0	0	0	0	0	0	0	0	0	0	0	0	0	0	0	0	0	0	0	0	0	0	0	0	0	0	0	0	0	0	0	0	0	0	0
FliJ	0	0	0	0	0	0	0	0	0	0	0	0	0	0	0	0	0	0	0	0	0	0	0	0	0	0	0	0	0	0	0	0	0	0	0	0	0	0	0	0	0	0	0	0	0	0	0	1	0
FliO	0	0	0	0	0	0	0	0	0	0	0	0	0	0	0	0	0	0	0	0	0	0	0	0	0	0	0	0	0	0	0	0	0	0	0	0	0	0	0	0	0	0	0	0	0	1	0	0	0
FliH	0	0	0	0	0	0	0	0	0	0	0	0	0	0	0	0	0	0	0	0	0	0	0	0	0	0	0	0	0	0	0	0	0	0	0	0	0	0	0	0	0	0	0	0	0	0	0	0	0
[truncated: 28 more columns]

## Sheet: SD1000
	PdeN	PdeF	PdeD	YdiV	PdeI	PdeH	BluF	PdeG	CsrD	PdeA	PdeK	DosC	DgcC	DgcQ	DgcM	DgcT	DgcZ	Tsr	Aer	Trg	Tar	Tap	CheB	CheR	CheW	CheA	ArcB	EvgS	TorS	RcsD	BasS	QseC	FdhF	YdhV	PpdC	PpdD	CsgG	RfaI	RfaJ	CheZ	FliD	YcgR	FliC	FlgL	FliL	FliS	FlgK	FliK	FlgE
PdeN	1	1	1	1	1	1	1	1	1	1	1	0	0	0	0	0	0	0	0	0	0	0	0	0	0	0	0	0	0	0	0	0	0	0	0	0	0	0	0	0	0	0	0	0	0	0	0	0	0
PdeF	1	1	1	1	1	1	1	1	1	1	1	0	0	0	0	0	0	0	0	0	0	0	0	0	0	0	0	0	0	0	0	0	0	0	0	0	0	0	0	0	0	0	0	0	0	0	0	0	0
PdeD	1	1	1	1	1	1	1	1	1	1	1	0	0	0	0	0	0	0	0	0	0	0	0	0	0	0	0	0	0	0	0	0	0	0	0	0	0	0	0	0	0	0	0	0	0	0	0	0	0
YdiV	1	1	1	1	1	1	1	1	1	1	1	0	0	0	0	0	0	0	0	0	0	0	0	0	0	0	0	0	0	0	0	0	0	0	0	0	0	0	0	0	0	0	0	0	0	0	0	0	0
PdeI	1	1	1	1	1	1	1	1	1	1	1	0	0	0	0	0	0	0	0	0	0	0	0	0	0	0	0	0	0	0	0	0	0	0	0	0	0	0	0	0	0	0	0	0	0	0	0	0	0
PdeH	1	1	1	1	1	1	1	1	1	1	1	0	0	0	0	0	0	0	0	0	0	0	0	0	0	0	0	0	0	0	0	0	0	0	0	0	0	0	0	0	0	0	0	0	0	0	0	0	0
BluF	1	1	1	1	1	1	1	1	1	1	1	0	0	0	0	0	0	0	0	0	0	0	0	0	0	0	0	0	0	0	0	0	0	0	0	0	0	0	0	0	0	0	0	0	0	0	0	0	0
PdeG	1	1	1	1	1	1	1	1	1	1	1	0	0	0	0	0	0	0	0	0	0	0	0	0	0	0	0	0	0	0	0	0	0	0	0	0	0	0	0	0	0	0	0	0	0	0	0	0	0
CsrD	1	1	1	1	1	1	1	1	1	1	1	0	0	0	0	0	0	0	0	0	0	0	0	0	0	0	0	0	0	0	0	0	0	0	0	0	0	0	0	0	0	0	0	0	0	0	0	0	0
PdeA	1	1	1	1	1	1	1	1	1	1	1	0	0	0	0	0	0	0	0	0	0	0	0	0	0	0	0	0	0	0	0	0	0	0	0	0	0	0	0	0	0	0	0	0	0	0	0	0	0
PdeK	1	1	1	1	1	1	1	1	1	1	1	0	0	0	0	0	0	0	0	0	0	0	0	0	0	0	0	0	0	0	0	0	0	0	0	0	0	0	0	0	0	0	0	0	0	0	0	0	0
DosC	0	0	0	0	0	0	0	0	0	0	0	1	1	1	1	1	1	0	0	0	0	0	0	0	0	0	0	0	0	0	0	0	0	0	0	0	0	0	0	0	0	0	0	0	0	0	0	0	0
DgcC	0	0	0	0	0	0	0	0	0	0	0	1	1	1	1	1	1	0	0	0	0	0	0	0	0	0	0	0	0	0	0	0	0	0	0	0	0	0	0	0	0	0	0	0	0	0	0	0	0
DgcQ	0	0	0	0	0	0	0	0	0	0	0	1	1	1	1	1	1	0	0	0	0	0	0	0	0	0	0	0	0	0	0	0	0	0	0	0	0	0	0	0	0	0	0	0	0	0	0	0	0
DgcM	0	0	0	0	0	0	0	0	0	0	0	1	1	1	1	1	1	0	0	0	0	0	0	0	0	0	0	0	0	0	0	0	0	0	0	0	0	0	0	0	0	0	0	0	0	0	0	0	0
DgcT	0	0	0	0	0	0	0	0	0	0	0	1	1	1	1	1	1	0	0	0	0	0	0	0	0	0	0	0	0	0	0	0	0	0	0	0	0	0	0	0	0	0	0	0	0	0	0	0	0
DgcZ	0	0	0	0	0	0	0	0	0	0	0	1	1	1	1	1	1	0	0	0	0	0	0	0	0	0	0	0	0	0	0	0	0	0	0	0	0	0	0	0	0	0	0	0	0	0	0	0	0
Tsr	0	0	0	0	0	0	0	0	0	0	0	0	0	0	0	0	0	1	1	1	1	1	0	0	0	0	0	0	0	0	0	0	0	0	0	0	0	0	0	0	0	0	0	0	0	0	0	0	0
Aer	0	0	0	0	0	0	0	0	0	0	0	0	0	0	0	0	0	1	1	1	1	1	0	0	0	0	0	0	0	0	0	0	0	0	0	0	0	0	0	0	0	0	0	0	0	0	0	0	0
Trg	0	0	0	0	0	0	0	0	0	0	0	0	0	0	0	0	0	1	1	1	1	1	0	0	0	0	0	0	0	0	0	0	0	0	0	0	0	0	0	0	0	0	0	0	0	0	0	0	0
Tar	0	0	0	0	0	0	0	0	0	0	0	0	0	0	0	0	0	1	1	1	1	1	0	0	0	0	0	0	0	0	0	0	0	0	0	0	0	0	0	0	0	0	0	0	0	0	0	0	0
Tap	0	0	0	0	0	0	0	0	0	0	0	0	0	0	0	0	0	1	1	1	1	1	0	0	0	0	0	0	0	0	0	0	0	0	0	0	0	0	0	0	0	0	0	0	0	0	0	0	0
CheB	0	0	0	0	0	0	0	0	0	0	0	0	0	0	0	0	0	0	0	0	0	0	1	1	1	0	0	0	0	0	0	0	0	0	0	0	0	0	0	0	0	0	0	0	0	0	0	0	0
CheR	0	0	0	0	0	0	0	0	0	0	0	0	0	0	0	0	0	0	0	0	0	0	1	1	1	0	0	0	0	0	0	0	0	0	0	0	0	0	0	0	0	0	0	0	0	0	0	0	0
CheW	0	0	0	0	0	0	0	0	0	0	0	0	0	0	0	0	0	0	0	0	0	0	1	1	1	0	0	0	0	0	0	0	0	0	0	0	0	0	0	0	0	0	0	0	0	0	0	0	0
CheA	0	0	0	0	0	0	0	0	0	0	0	0	0	0	0	0	0	0	0	0	0	0	0	0	0	1	1	1	1	1	0	0	0	0	0	0	0	0	0	0	0	0	0	0	0	0	0	0	0
ArcB	0	0	0	0	0	0	0	0	0	0	0	0	0	0	0	0	0	0	0	0	0	0	0	0	0	1	1	1	1	1	0	0	0	0	0	0	0	0	0	0	0	0	0	0	0	0	0	0	0
EvgS	0	0	0	0	0	0	0	0	0	0	0	0	0	0	0	0	0	0	0	0	0	0	0	0	0	1	1	1	1	1	0	0	0	0	0	0	0	0	0	0	0	0	0	0	0	0	0	0	0
TorS	0	0	0	0	0	0	0	0	0	0	0	0	0	0	0	0	0	0	0	0	0	0	0	0	0	1	1	1	1	1	0	0	0	0	0	0	0	0	0	0	0	0	0	0	0	0	0	0	0
RcsD	0	0	0	0	0	0	0	0	0	0	0	0	0	0	0	0	0	0	0	0	0	0	0	0	0	1	1	1	1	1	1	1	0	0	0	0	0	0	0	0	0	0	0	0	0	0	0	0	0
BasS	0	0	0	0	0	0	0	0	0	0	0	0	0	0	0	0	0	0	0	0	0	0	0	0	0	0	0	0	0	1	1	1	0	0	0	0	0	0	0	0	0	0	0	0	0	0	0	0	0
QseC	0	0	0	0	0	0	0	0	0	0	0	0	0	0	0	0	0	0	0	0	0	0	0	0	0	0	0	0	0	1	1	1	0	0	0	0	0	0	0	0	0	0	0	0	0	0	0	0	0
FdhF	0	0	0	0	0	0	0	0	0	0	0	0	0	0	0	0	0	0	0	0	0	0	0	0	0	0	0	0	0	0	0	0	1	0	0	0	0	0	0	0	0	0	0	0	0	0	0	0	0
YdhV	0	0	0	0	0	0	0	0	0	0	0	0	0	0	0	0	0	0	0	0	0	0	0	0	0	0	0	0	0	0	0	0	0	1	0	0	0	0	0	0	0	0	0	0	0	0	0	0	0
PpdC	0	0	0	0	0	0	0	0	0	0	0	0	0	0	0	0	0	0	0	0	0	0	0	0	0	0	0	0	0	0	0	0	0	0	1	0	0	0	0	0	0	0	0	0	0	0	0	0	0
PpdD	0	0	0	0	0	0	0	0	0	0	0	0	0	0	0	0	0	0	0	0	0	0	0	0	0	0	0	0	0	0	0	0	0	0	0	1	0	0	0	0	0	0	0	0	0	0	0	0	0
CsgG	0	0	0	0	0	0	0	0	0	0	0	0	0	0	0	0	0	0	0	0	0	0	0	0	0	0	0	0	0	0	0	0	0	0	0	0	1	0	0	0	0	0	0	0	0	0	0	0	0
RfaI	0	0	0	0	0	0	0	0	0	0	0	0	0	0	0	0	0	0	0	0	0	0	0	0	0	0	0	0	0	0	0	0	0	0	0	0	0	1	1	0	0	0	0	0	0	0	0	0	0
RfaJ	0	0	0	0	0	0	0	0	0	0	0	0	0	0	0	0	0	0	0	0	0	0	0	0	0	0	0	0	0	0	0	0	0	0	0	0	0	1	1	0	0	0	0	0	0	0	0	0	0
CheZ	0	0	0	0	0	0	0	0	0	0	0	0	0	0	0	0	0	0	0	0	0	0	0	0	0	0	0	0	0	0	0	0	0	0	0	0	0	0	0	1	0	0	0	0	0	0	0	0	0
FliD	0	0	0	0	0	0	0	0	0	0	0	0	0	0	0	0	0	0	0	0	0	0	0	0	0	0	0	0	0	0	0	0	0	0	0	0	0	0	0	0	1	0	0	0	0	0	0	0	0
YcgR	0	0	0	0	0	0	0	0	0	0	0	0	0	0	0	0	0	0	0	0	0	0	0	0	0	0	0	0	0	0	0	0	0	0	0	0	0	0	0	0	0	1	0	0	0	0	0	0	0
FliC	0	0	0	0	0	0	0	0	0	0	0	0	0	0	0	0	0	0	0	0	0	0	0	0	0	0	0	0	0	0	0	0	0	0	0	0	0	0	0	0	0	0	1	1	0	0	0	0	0
FlgL	0	0	0	0	0	0	0	0	0	0	0	0	0	0	0	0	0	0	0	0	0	0	0	0	0	0	0	0	0	0	0	0	0	0	0	0	0	0	0	0	0	0	1	1	0	0	0	0	0
FliL	0	0	0	0	0	0	0	0	0	0	0	0	0	0	0	0	0	0	0	0	0	0	0	0	0	0	0	0	0	0	0	0	0	0	0	0	0	0	0	0	0	0	0	0	1	0	0	0	0
FliS	0	0	0	0	0	0	0	0	0	0	0	0	0	0	0	0	0	0	0	0	0	0	0	0	0	0	0	0	0	0	0	0	0	0	0	0	0	0	0	0	0	0	0	0	0	1	0	0	0
FlgK	0	0	0	0	0	0	0	0	0	0	0	0	0	0	0	0	0	0	0	0	0	0	0	0	0	0	0	0	0	0	0	0	0	0	0	0	0	0	0	0	0	0	0	0	0	0	1	0	0
FliK	0	0	0	0	0	0	0	0	0	0	0	0	0	0	0	0	0	0	0	0	0	0	0	0	0	0	0	0	0	0	0	0	0	0	0	0	0	0	0	0	0	0	0	0	0	0	0	1	0
FlgE	0	0	0	0	0	0	0	0	0	0	0	0	0	0	0	0	0	0	0	0	0	0	0	0	0	0	0	0	0	0	0	0	0	0	0	0	0	0	0	0	0	0	0	0	0	0	0	0	1
FlgH	0	0	0	0	0	0	0	0	0	0	0	0	0	0	0	0	0	0	0	0	0	0	0	0	0	0	0	0	0	0	0	0	0	0	0	0	0	0	0	0	0	0	0	0	0	0	0	0	0
FlgI	0	0	0	0	0	0	0	0	0	0	0	0	0	0	0	0	0	0	0	0	0	0	0	0	0	0	0	0	0	0	0	0	0	0	0	0	0	0	0	0	0	0	0	0	0	0	0	0	0
FlgA	0	0	0	0	0	0	0	0	0	0	0	0	0	0	0	0	0	0	0	0	0	0	0	0	0	0	0	0	0	0	0	0	0	0	0	0	0	0	0	0	0	0	0	0	0	0	0	0	0
FlgF	0	0	0	0	0	0	0	0	0	0	0	0	0	0	0	0	0	0	0	0	0	0	0	0	0	0	0	0	0	0	0	0	0	0	0	0	0	0	0	0	0	0	0	0	0	0	0	0	0
FlgJ	0	0	0	0	0	0	0	0	0	0	0	0	0	0	0	0	0	0	0	0	0	0	0	0	0	0	0	0	0	0	0	0	0	0	0	0	0	0	0	0	0	0	0	0	0	0	0	0	0
FliM	0	0	0	0	0	0	0	0	0	0	0	0	0	0	0	0	0	0	0	0	0	0	0	0	0	0	0	0	0	0	0	0	0	0	0	0	0	0	0	0	0	0	0	0	0	0	0	0	0
FlgD	0	0	0	0	0	0	0	0	0	0	0	0	0	0	0	0	0	0	0	0	0	0	0	0	0	0	0	0	0	0	0	0	0	0	0	0	0	0	0	0	0	0	0	0	0	0	0	0	0
FliG	0	0	0	0	0	0	0	0	0	0	0	0	0	0	0	0	0	0	0	0	0	0	0	0	0	0	0	0	0	0	0	0	0	0	0	0	0	0	0	0	0	0	0	0	0	0	0	0	0
FliE	0	0	0	0	0	0	0	0	0	0	0	0	0	0	0	0	0	0	0	0	0	0	0	0	0	0	0	0	0	0	0	0	0	0	0	0	0	0	0	0	0	0	0	0	0	0	0	0	0
FlgB	0	0	0	0	0	0	0	0	0	0	0	0	0	0	0	0	0	0	0	0	0	0	0	0	0	0	0	0	0	0	0	0	0	0	0	0	0	0	0	0	0	0	0	0	0	0	0	0	0
FlgC	0	0	0	0	0	0	0	0	0	0	0	0	0	0	0	0	0	0	0	0	0	0	0	0	0	0	0	0	0	0	0	0	0	0	0	0	0	0	0	0	0	0	0	0	0	0	0	0	0
FliP	0	0	0	0	0	0	0	0	0	0	0	0	0	0	0	0	0	0	0	0	0	0	0	0	0	0	0	0	0	0	0	0	0	0	0	0	0	0	0	0	0	0	0	0	0	0	0	0	0
FliR	0	0	0	0	0	0	0	0	0	0	0	0	0	0	0	0	0	0	0	0	0	0	0	0	0	0	0	0	0	0	0	0	0	0	0	0	0	0	0	0	0	0	0	0	0	0	0	0	0
FliQ	0	0	0	0	0	0	0	0	0	0	0	0	0	0	0	0	0	0	0	0	0	0	0	0	0	0	0	0	0	0	0	0	0	0	0	0	0	0	0	0	0	0	0	0	0	0	0	0	0
FliF	0	0	0	0	0	0	0	0	0	0	0	0	0	0	0	0	0	0	0	0	0	0	0	0	0	0	0	0	0	0	0	0	0	0	0	0	0	0	0	0	0	0	0	0	0	0	0	0	0
FlhA	0	0	0	0	0	0	0	0	0	0	0	0	0	0	0	0	0	0	0	0	0	0	0	0	0	0	0	0	0	0	0	0	0	0	0	0	0	0	0	0	0	0	0	0	0	0	0	0	0
LfhA	0	0	0	0	0	0	0	0	0	0	0	0	0	0	0	0	0	0	0	0	0	0	0	0	0	0	0	0	0	0	0	0	0	0	0	0	0	0	0	0	0	0	0	0	0	0	0	0	0
FliN	0	0	0	0	0	0	0	0	0	0	0	0	0	0	0	0	0	0	0	0	0	0	0	0	0	0	0	0	0	0	0	0	0	0	0	0	0	0	0	0	0	0	0	0	0	0	0	0	0
FliI	0	0	0	0	0	0	0	0	0	0	0	0	0	0	0	0	0	0	0	0	0	0	0	0	0	0	0	0	0	0	0	0	0	0	0	0	0	0	0	0	0	0	0	0	0	0	0	0	0
FlhB	0	0	0	0	0	0	0	0	0	0	0	0	0	0	0	0	0	0	0	0	0	0	0	0	0	0	0	0	0	0	0	0	0	0	0	0	0	0	0	0	0	0	0	0	0	0	0	0	0
FlgG	0	0	0	0	0	0	0	0	0	0	0	0	0	0	0	0	0	0	0	0	0	0	0	0	0	0	0	0	0	0	0	0	0	0	0	0	0	0	0	0	0	0	0	0	0	0	0	0	0
MotA	0	0	0	0	0	0	0	0	0	0	0	0	0	0	0	0	0	0	0	0	0	0	0	0	0	0	0	0	0	0	0	0	0	0	0	0	0	0	0	0	0	0	0	0	0	0	0	0	0
MotB	0	0	0	0	0	0	0	0	0	0	0	0	0	0	0	0	0	0	0	0	0	0	0	0	0	0	0	0	0	0	0	0	0	0	0	0	0	0	0	0	0	0	0	0	0	0	0	0	0
LafU	0	0	0	0	0	0	0	0	0	0	0	0	0	0	0	0	0	0	0	0	0	0	0	0	0	0	0	0	0	0	0	0	0	0	0	0	0	0	0	0	0	0	0	0	0	0	0	0	0
FlgM	0	0	0	0	0	0	0	0	0	0	0	0	0	0	0	0	0	0	0	0	0	0	0	0	0	0	0	0	0	0	0	0	0	0	0	0	0	0	0	0	0	0	0	0	0	0	0	0	0
FliJ	0	0	0	0	0	0	0	0	0	0	0	0	0	0	0	0	0	0	0	0	0	0	0	0	0	0	0	0	0	0	0	0	0	0	0	0	0	0	0	0	0	0	0	0	0	0	0	0	0
FliO	0	0	0	0	0	0	0	0	0	0	0	0	0	0	0	0	0	0	0	0	0	0	0	0	0	0	0	0	0	0	0	0	0	0	0	0	0	0	0	0	0	0	0	0	0	0	0	0	0
FliH	0	0	0	0	0	0	0	0	0	0	0	0	0	0	0	0	0	0	0	0	0	0	0	0	0	0	0	0	0	0	0	0	0	0	0	0	0	0	0	0	0	0	0	0	0	0	0	0	0
[truncated: 28 more columns]

## Sheet: DAVID_Output_SD50
Spectral Depth 50; Directed Motility Module
Category	Term	Count	%	PValue	Genes	List Total	Pop Hits	Pop Total	Fold Enrichment	Bonferroni	Benjamini	FDR
KEGG_PATHWAY	eco02040:Flagellar assembly	32	42.6667	1.14e-46	P06974, P0AC05, P0ABW9, P75933, P33135, P52614, P52612, P75937, P52613, P75936, P0AF06, P0AEM4, P33235, P0AC07, P75938, P0ABX5, P24216, P15070, P0ABX2, P0A8T5, P0ABZ1, P29744, P76298, P76299, P04949, P31068, P0A6S3, P0A6S0, P26608, P22586, P09348, P25798	51	36	1564	27.2593	1.14e-45	1.14e-45	1.14e-45
UP_KEYWORDS	Bacterial flagellum	20	26.6667	1.02e-33	P06974, P76010, P0ABW9, P33135, P04949, P75937, P33235, P0AC07, P0A6S3, P75938, P0A6S0, P0ABX5, P22586, P24216, P15070, P0ABX2, P0A8T5, P0ABZ1, P25798, P29744	75	20	4139	55.1867	6.52e-32	6.52e-32	4.99e-32
GOTERM_BP_DIRECT	GO:0071973~bacterial-type flagellum-dependent cell motility	22	29.3333	1.33e-30	P06974, P76010, P75933, P04949, P75942, P52614, P52612, P31068, P52613, P33235, P0A6S3, P75938, P0A6S0, P26608, P0ABX5, P24216, P15070, P09348, P0A8T5, P0ABZ1, P25798, P29744	68	30	3277	35.3402	9.32e-29	9.32e-29	8.25e-29
UP_KEYWORDS	Chemotaxis	18	24	6.75e-27	P06974, P07018, P0ABX8, P05704, P50466, P0AF06, P52613, P0A9H9, P0A964, P07363, P22586, P07330, P15070, P02942, P07364, P09348, P07017, P0ABZ1	75	22	4139	45.1527	4.32e-25	2.16e-25	1.65e-25
GOTERM_BP_DIRECT	GO:0006935~chemotaxis	16	21.3333	1.32e-21	P07018, P0ABX8, P05704, P0AF06, P52613, P0A9H9, P0A964, P07363, P22586, P07330, P15070, P02942, P07364, P09348, P07017, P0ABZ1	68	22	3277	35.0481	9.23e-20	4.61e-20	4.09e-20
GOTERM_CC_DIRECT	GO:0009425~bacterial-type flagellum basal body	12	16	2.07e-18	P0AC05, P06974, P75938, P76010, P0ABX8, P22586, P33135, P15070, P75937, P0A8T5, P0ABZ1, P0AC07	64	12	2941	45.9531	5.18e-17	5.18e-17	5.18e-17
KEGG_PATHWAY	eco02030:Bacterial chemotaxis	15	20	5.57e-18	P06974, P07018, P05704, P50466, P0AF06, P0A9H9, P0A964, P07363, P07330, P15070, P02942, P07364, P09348, P07017, P0ABZ1	51	20	1564	23	5.57e-17	2.78e-17	2.78e-17
UP_KEYWORDS	Bacterial flagellum biogenesis	12	16	3.12e-16	P0AC05, P76298, P26608, P76299, P75933, P75942, P52614, P52612, P0AEM4, P31068, P52613, P75936	75	17	4139	38.9553	2.13e-14	6.66e-15	5.1e-15
GOTERM_CC_DIRECT	GO:0009424~bacterial-type flagellum hook	10	13.3333	5.18e-15	P75938, P0ABW9, P0ABX5, P24216, P52614, P75937, P0ABX2, P75936, P33235, P29744	64	10	2941	45.9531	1.3e-13	6.48e-14	6.48e-14
INTERPRO	IPR001633:Diguanylate phosphodiesterase, EAL domain	11	14.6667	4.93e-14	P75990, P76204, P76446, P75995, P13518, P37646, P77172, P75800, P23842, P76261, P37649	75	17	3956	34.1302	6.36e-12	6.36e-12	5.72e-12
UP_SEQ_FEATURE	domain:EAL	10	13.3333	1.02e-12	P75990, P76204, P76446, P75995, P13518, P37646, P77172, P75800, P23842, P76261	74	16	4147	35.0253	1.07e-10	1.08e-10	1.04e-10
GOTERM_MF_DIRECT	GO:0003774~motor activity	8	10.6667	1.39e-12	P06974, P0A6S0, P15070, P31068, P52613, P0A8T5, P0ABZ1, P25798	52	8	3186	61.2692	6.83e-11	6.83e-11	5.85e-11
GOTERM_BP_DIRECT	GO:0044780~bacterial-type flagellum assembly	10	13.3333	1.64e-12	P76298, P26608, P76299, P33135, P75942, P52614, P52612, P0ABZ1, P33235, P0AC07	68	15	3277	32.1275	1.14e-10	3.82e-11	3.38e-11
INTERPRO	IPR000160:GGDEF domain	10	13.3333	1.36e-11	P75908, P77302, P31129, P13518, P76330, P0AAP1, P0AA89, P77172, P23842, P37649	75	19	3956	27.7614	1.75e-09	8.75e-10	7.87e-10
UP_KEYWORDS	Flagellar rotation	8	10.6667	1.53e-11	P06974, P0ABX8, P22586, P15070, P09348, P0AF06, P0ABZ1, P0A9H9	75	9	4139	49.0548	9.81e-10	2.45e-10	1.88e-10
GOTERM_BP_DIRECT	GO:0071978~bacterial-type flagellum-dependent swarming motility	8	10.6667	1.69e-09	P75938, P0ABW9, P0ABX8, P0ABX5, P09348, P75937, P0ABX2, P75936	68	13	3277	29.6561	1.18e-07	2.96e-08	2.62e-08
SMART	SM00052:DUF2	10	13.3333	2.02e-09	P75990, P76446, P75995, P13518, P37646, P77172, P75800, P23842, P76261, P37649	36	16	792	13.75	4.25e-08	4.25e-08	3.03e-08
UP_SEQ_FEATURE	domain:GGDEF	8	10.6667	6.61e-09	P75908, P77302, P31129, P13518, P76330, P0AAP1, P0AA89, P23842	74	17	4147	26.372	6.94e-07	3.5e-07	3.37e-07
UP_KEYWORDS	Bacterial flagellum protein export	6	8	9.44e-09	P0AC05, P76298, P76299, P52612, P31068, P52613	75	6	4139	55.1867	6.04e-07	1.21e-07	9.25e-08
GOTERM_BP_DIRECT	GO:0044781~bacterial-type flagellum organization	7	9.33333	1.15e-08	P0AC05, P75933, P22586, P0AEM4, P31068, P52613, P75936	68	10	3277	33.7338	8.03e-07	1.61e-07	1.42e-07
INTERPRO	IPR001444:Flagellar basal body rod protein, N-terminal	6	8	1.18e-08	P75938, P0ABW9, P0ABX5, P75937, P0ABX2, P33235	75	6	3956	52.7467	1.53e-06	5.09e-07	4.57e-07
SMART	SM00267:DUF1	10	13.3333	1.49e-08	P75908, P77302, P31129, P13518, P76330, P0AAP1, P0AA89, P77172, P23842, P37649	36	19	792	11.5789	3.13e-07	1.56e-07	1.12e-07
INTERPRO	IPR003660:HAMP linker domain	8	10.6667	8.19e-08	P07018, P39453, P30844, P05704, P02942, P37649, P50466, P07017	75	22	3956	19.1806	1.06e-05	2.64e-06	2.38e-06
GOTERM_MF_DIRECT	GO:0052621~diguanylate cyclase activity	6	8	2.04e-07	P75908, P77302, P31129, P76330, P0AAP1, P0AA89	52	10	3186	36.7615	1e-05	5.01e-06	4.29e-06
UP_SEQ_FEATURE	domain:Methyl-accepting transducer	5	6.66667	4.36e-07	P07018, P05704, P02942, P50466, P07017	74	5	4147	56.0405	4.58e-05	1.54e-05	1.48e-05
UP_KEYWORDS	Transducer	5	6.66667	4.65e-07	P07018, P05704, P02942, P50466, P07017	75	5	4139	55.1867	2.97e-05	4.96e-06	3.8e-06
INTERPRO	IPR004089:Methyl-accepting chemotaxis protein (MCP) signalling domain	5	6.66667	5.57e-07	P07018, P05704, P02942, P50466, P07017	75	5	3956	52.7467	7.18e-05	8.98e-06	8.07e-06
INTERPRO	IPR010930:Flagellar basal-body/hook protein, C-terminal domain	5	6.66667	5.57e-07	P75938, P0ABX5, P75937, P0ABX2, P33235	75	5	3956	52.7467	7.18e-05	8.98e-06	8.07e-06
INTERPRO	IPR004090:Chemotaxis methyl-accepting receptor	5	6.66667	5.57e-07	P07018, P05704, P02942, P50466, P07017	75	5	3956	52.7467	7.18e-05	8.98e-06	8.07e-06
INTERPRO	IPR019776:Flagellar basal body rod protein, conserved site	5	6.66667	5.57e-07	P75938, P0ABW9, P0ABX5, P75937, P0ABX2	75	5	3956	52.7467	7.18e-05	8.98e-06	8.07e-06
UP_SEQ_FEATURE	domain:HPt	5	6.66667	1.29e-06	P39453, P0AEC3, P30855, P07363, P39838	74	6	4147	46.7005	0.000136	3.42e-05	3.29e-05
INTERPRO	IPR008207:Signal transduction histidine kinase, phosphotransfer (Hpt) domain	5	6.66667	1.65e-06	P39453, P0AEC3, P30855, P07363, P39838	75	6	3956	43.9556	0.000212	2.36e-05	2.12e-05
UP_KEYWORDS	Methylation	7	9.33333	3.6e-06	P07018, P08372, P05704, P02942, P50466, P36647, P07017	75	25	4139	15.4523	0.00023	3.29e-05	2.52e-05
KEGG_PATHWAY	eco02020:Two-component system	17	22.6667	4.53e-06	P07018, P30855, P30844, P40719, P05704, P04949, P39838, P50466, P0A964, P39453, P0AEC3, P07363, P07330, P02942, P07364, P09348, P07017	51	146	1564	3.57078	4.53e-05	1.51e-05	1.51e-05
GOTERM_MF_DIRECT	GO:0004871~signal transducer activity	5	6.66667	6.92e-06	P0A964, P07018, P37649, P50466, P07017	52	9	3186	34.0385	0.000339	0.000113	9.69e-05
INTERPRO	IPR005467:Signal transduction histidine kinase, core	7	9.33333	9.49e-06	P39453, P0AEC3, P30855, P30844, P40719, P07363, P39838	75	28	3956	13.1867	0.00122372	0.000122	0.00011
GOTERM_MF_DIRECT	GO:0000155~phosphorelay sensor kinase activity	7	9.33333	9.92e-06	P39453, P77302, P0AEC3, P30855, P30844, P40719, P07363	52	33	3186	12.9965	0.000486	0.000122	0.000104
UP_SEQ_FEATURE	domain:HAMP	6	8	1.41e-05	P07018, P39453, P30844, P05704, P02942, P07017	74	19	4147	17.697	0.0014824	0.0003	0.000288
GOTERM_MF_DIRECT	GO:0004888~transmembrane signaling receptor activity	4	5.33333	1.53e-05	P07018, P05704, P02942, P07017	52	4	3186	61.2692	0.000749	0.00015	0.000128
SMART	SM00283:MA	5	6.66667	1.56e-05	P07018, P05704, P02942, P50466, P07017	36	5	792	22	0.000327	0.000109	7.79e-05
GOTERM_CC_DIRECT	GO:0005886~plasma membrane	39	52	2.44e-05	P06974, P0AC05, P30844, P76446, P75995, P05704, P33135, P39838, P52613, P0AF06, P0AC07, P0AEC3, P0AEA2, P07330, P23842, P02942, P15070, P0ABZ1, P07018, P30855, P40719, P13518, P76330, P76298, P0AAP1, P0ABX8, P76299, P04949, P37649, P50466, P0A9H9, P75908, P39453, P22586, P77172, P07363, P07364, P09348, P25798	64	1021	2941	1.75531	0.000609	0.000203	0.000203
INTERPRO	IPR003122:Chemotaxis methyl-accepting receptor, ligand-binding	4	5.33333	2.48e-05	P07018, P05704, P02942, P07017	75	4	3956	52.7467	0.00319535	0.000267	0.00024
INTERPRO	IPR004091:Chemotaxis methyl-accepting receptor, methyl-accepting site	4	5.33333	2.48e-05	P07018, P05704, P02942, P07017	75	4	3956	52.7467	0.00319535	0.000267	0.00024
INTERPRO	IPR003594:Histidine kinase-like ATPase, ATP-binding domain	7	9.33333	3.1e-05	P39453, P0AEC3, P30855, P30844, P40719, P07363, P39838	75	34	3956	10.8596	0.00399115	0.000308	0.000277
UP_KEYWORDS	c-di-GMP	5	6.66667	5.96e-05	P76010, P37646, P77172, P75800, P76261	75	13	4139	21.2256	0.00380758	0.000477	0.000365
INTERPRO	IPR004358:Signal transduction histidine kinase-related protein, C-terminal	6	8	6.44e-05	P39453, P0AEC3, P30855, P30844, P40719, P07363	75	24	3956	13.1867	0.00827098	0.000593	0.000533
GOTERM_MF_DIRECT	GO:0005198~structural molecule activity	5	6.66667	6.99e-05	P0A6S3, P04949, P0A8T5, P33235, P29744	52	15	3186	20.4231	0.0034174	0.000523	0.000449
GOTERM_MF_DIRECT	GO:0009927~histidine phosphotransfer kinase activity	4	5.33333	7.48e-05	P39453, P0AEC3, P30855, P39838	52	6	3186	40.8462	0.00365631	0.000523	0.000449
INTERPRO	IPR003661:Signal transduction histidine kinase, subgroup 1, dimerisation/phosphoacceptor domain	6	8	7.93e-05	P39453, P0AEC3, P30855, P30844, P40719, P07363	75	25	3956	12.6592	0.0101792	0.000682	0.000613
GOTERM_BP_DIRECT	GO:0007165~signal transduction	4	5.33333	7.94e-05	P0A964, P05704, P02942, P50466	68	5	3277	38.5529	0.00554097	0.000926	0.00082
UP_SEQ_FEATURE	domain:Histidine kinase	6	8	8.79e-05	P39453, P0AEC3, P30855, P30844, P40719, P07363	74	27	4147	12.4535	0.00918628	0.0015527	0.00149411
GOTERM_BP_DIRECT	GO:0018106~peptidyl-histidine phosphorylation	6	8	9.67e-05	P39453, P0AEC3, P30855, P30844, P40719, P39838	68	24	3277	12.0478	0.00674509	0.000967	0.000856
GOTERM_MF_DIRECT	GO:0071111~cyclic-guanylate-specific phosphodiesterase activity	4	5.33333	0.000303	P37646, P77172, P75800, P76261	52	9	3186	27.2308	0.0147613	0.00185863	0.00159311
SMART	SM00319:TarH	4	5.33333	0.000308	P07018, P05704, P02942, P07017	36	4	792	22	0.00644258	0.00161561	0.00115401
SMART	SM00304:HAMP	6	8	0.000388	P07018, P39453, P30844, P05704, P02942, P07017	36	16	792	8.25	0.00810868	0.00162803	0.00116288
UP_KEYWORDS	Cell membrane	33	44	0.000567	P06974, P0AC05, P30844, P76446, P05704, P33135, P39838, P52613, P0AF06, P0AC07, P0AEC3, P0AEA2, P02942, P15070, P07017, P0ABZ1, P07018, P30855, P40719, P13518, P76330, P76298, P0AAP1, P0ABX8, P76299, P37649, P50466, P75908, P39453, P22586, P77172, P09348, P25798	75	1052	4139	1.73114	0.0356265	0.00385091	0.00294836
UP_KEYWORDS	Secreted	4	5.33333	0.000602	P24216, P04949, P33235, P29744	75	10	4139	22.0747	0.0377882	0.00385091	0.00294836
SMART	SM00073:HPT	4	5.33333	0.000746	P39453, P0AEC3, P30855, P07363	36	5	792	17.6	0.0155489	0.00261086	0.0018649
GOTERM_CC_DIRECT	GO:0005622~intracellular	8	10.6667	0.000791	P39453, P77302, P0AEC3, P30855, P30844, P40719, P33135, P39838	64	73	2941	5.03596	0.0195868	0.00494335	0.00494335
INTERPRO	IPR020013:Fagellar hook-basal body protein, FlgE/F/G	3	4	0.00102322	P75938, P0ABX5, P75937	75	3	3956	52.7467	0.123714	0.0082497	0.00741834
UP_KEYWORDS	Two-component regulatory system	7	9.33333	0.00121163	P39453, P0AEC3, P30855, P30844, P40719, P07363, P39838	75	68	4139	5.68098	0.0746573	0.00704947	0.00539725
GOTERM_MF_DIRECT	GO:0005525~GTP binding	6	8	0.00138324	P75908, P77302, P31129, P76330, P0AAP1, P0AA89	52	53	3186	6.93614	0.0655767	0.00753098	0.00645512
GOTERM_BP_DIRECT	GO:0023014~signal transduction by protein phosphorylation	5	6.66667	0.00146135	P39453, P0AEC3, P30855, P30844, P40719	68	25	3277	9.63824	0.097304	0.0127868	0.0113255
UP_KEYWORDS	GTP-binding	6	8	0.00149978	P75908, P77302, P31129, P76330, P0AAP1, P0AA89	75	48	4139	6.89833	0.0915888	0.00799884	0.00612411
SMART	SM00387:HATPase_c	7	9.33333	0.00188885	P39453, P0AEC3, P30855, P30844, P40719, P07363, P39838	36	32	792	4.8125	0.0389255	0.00566655	0.00404753
UP_KEYWORDS	Membrane	34	45.3333	0.00193425	P06974, P0AC05, P30844, P76446, P05704, P33135, P39838, P52613, P0AF06, P0AC07, P0AEC3, P0AEA2, P02942, P15070, P07017, P0ABZ1, P07018, P30855, P40719, P13518, P76330, P76298, P0AAP1, P0ABX8, P76299, P37649, P50466, P75908, P39453, P0A6S0, P22586, P77172, P09348, P25798	75	1174	4139	1.59825	0.116542	0.00922592	0.0070636
UP_KEYWORDS	Transmembrane helix	28	37.3333	0.00216233	P0AC05, P30844, P76446, P05704, P33135, P39838, P0AF06, P0AC07, P0AEC3, P02942, P07017, P07018, P30855, P40719, P13518, P76330, P76298, P0AAP1, P0ABX8, P76299, P37649, P50466, P75908, P39453, P22586, P77172, P09348, P25798	75	892	4139	1.73232	0.12937	0.00922592	0.0070636
UP_KEYWORDS	Cell inner membrane	28	37.3333	0.00216233	P06974, P0AC05, P30844, P76446, P05704, P33135, P39838, P0AF06, P0AC07, P0AEC3, P02942, P15070, P07017, P0ABZ1, P07018, P30855, P40719, P76330, P76298, P0AAP1, P0ABX8, P76299, P50466, P75908, P39453, P77172, P09348, P25798	75	892	4139	1.73232	0.12937	0.00922592	0.0070636
GOTERM_BP_DIRECT	GO:0009306~protein secretion	4	5.33333	0.00253113	P0AC05, P76298, P76299, P0AC07	68	14	3277	13.7689	0.162559	0.0191379	0.0169507
GOTERM_CC_DIRECT	GO:0009288~bacterial-type flagellum	3	4	0.00263601	P31068, P52613, P0A9H9	64	4	2941	34.4648	0.0638573	0.0131801	0.0131801
GOTERM_BP_DIRECT	GO:0000160~phosphorelay signal transduction system	7	9.33333	0.00273398	P39453, P0AEC3, P30855, P30844, P40719, P07363, P39838	68	70	3277	4.81912	0.174397	0.0191379	0.0169507
INTERPRO	IPR024744:Putative cyclic diguanylate phosphodiesterase, CSS motif-containing domain	3	4	0.00332859	P76446, P75995, P76261	75	5	3956	31.648	0.349559	0.0252581	0.0227127
UP_KEYWORDS	Transmembrane	28	37.3333	0.00444878	P0AC05, P30844, P76446, P05704, P33135, P39838, P0AF06, P0AC07, P0AEC3, P02942, P07017, P07018, P30855, P40719, P13518, P76330, P76298, P0AAP1, P0ABX8, P76299, P37649, P50466, P75908, P39453, P22586, P77172, P09348, P25798	75	936	4139	1.65088	0.248254	0.0177951	0.0136244
GOTERM_CC_DIRECT	GO:0016021~integral component of membrane	25	33.3333	0.00572964	P0AC05, P30844, P76446, P05704, P33135, P0AF06, P0AC07, P0AEC3, P07018, P30855, P40719, P13518, P76330, P76298, P0AAP1, P0ABX8, P76299, P37649, P50466, P75908, P39453, P22586, P77172, P09348, P25798	64	687	2941	1.67224	0.133812	0.021705	0.021705
GOTERM_CC_DIRECT	GO:0005576~extracellular region	4	5.33333	0.0060774	P24216, P04949, P33235, P29744	64	18	2941	10.2118	0.141354	0.021705	0.021705
UP_KEYWORDS	Protein transport	6	8	0.00736265	P0AC05, P76298, P76299, P52612, P31068, P52613	75	69	4139	4.79884	0.376841	0.0277182	0.0212218
SMART	SM00388:HisKA	5	6.66667	0.00936109	P39453, P0AEC3, P30855, P30844, P40719	36	20	792	5.5	0.179227	0.0245729	0.017552
UP_KEYWORDS	Nucleotide-binding	17	22.6667	0.0103877	P77302, P30855, P30844, P31129, P40719, P76010, P76330, P0AAP1, P0AA89, P37646, P39838, P52612, P75908, P39453, P0AEC3, P07363, P77172	75	486	4139	1.9304	0.487415	0.0369339	0.0282775
UP_KEYWORDS	Phosphoprotein	8	10.6667	0.0109845	P39453, P0AEC3, P30855, P30844, P40719, P07330, P07363, P39838	75	138	4139	3.19923	0.506828	0.0370004	0.0283284
GOTERM_BP_DIRECT	GO:0046777~protein autophosphorylation	4	5.33333	0.0121636	P39453, P0AEC3, P30855, P07363	68	24	3277	8.03186	0.575429	0.0774051	0.0685588
UP_SEQ_FEATURE	transmembrane region	25	33.3333	0.0122574	P0AC05, P30844, P76446, P05704, P33135, P39838, P0AF06, P0AC07, P0AEC3, P02942, P07017, P07018, P30855, P40719, P76330, P76298, P0AAP1, P76299, P50466, P75908, P39453, P22586, P77172, P09348, P25798	74	875	4147	1.60116	0.726098	0.185613	0.178609
UP_SEQ_FEATURE	domain:Response regulatory	4	5.33333	0.0265071	P39453, P0AEC3, P30855, P07330	74	37	4147	6.05844	0.940442	0.351219	0.337966
INTERPRO	IPR000014:PAS domain	3	4	0.0271657	P77302, P0AEC3, P50466	75	14	3956	11.3029	0.971357	0.191262	0.171987
INTERPRO	IPR001789:Signal transduction response regulator, receiver domain	4	5.33333	0.0309809	P39453, P0AEC3, P30855, P07330	75	37	3956	5.70234	0.982747	0.191262	0.171987
GOTERM_MF_DIRECT	GO:0043424~protein histidine kinase binding	2	2.66667	0.0317638	P02942, P07017	52	2	3186	61.2692	0.794371	0.141493	0.12128
GOTERM_MF_DIRECT	GO:0008918~lipopolysaccharide 3-alpha-galactosyltransferase activity	2	2.66667	0.0317638	P27128, P27129	52	2	3186	61.2692	0.794371	0.141493	0.12128
UP_SEQ_FEATURE	region of interest:The 3 Arg may form a positively charged pocket, which binds the alpha-carboxyl group of the attractant AA	2	2.66667	0.0349005	P02942, P07017	74	2	4147	56.0405	0.976008	0.369945	0.355985
UP_SEQ_FEATURE	domain:CheW-like	2	2.66667	0.0349005	P0A964, P07363	74	2	4147	56.0405	0.976008	0.369945	0.355985
INTERPRO	IPR011006:CheY-like superfamily	4	5.33333	0.03549	P39453, P0AEC3, P30855, P07330	75	39	3956	5.40991	0.990547	0.191262	0.171987
INTERPRO	IPR013645:Glycosyl transferase, family 8, C-terminal	2	2.66667	0.0370663	P27128, P27129	75	2	3956	52.7467	0.992345	0.191262	0.171987
INTERPRO	IPR001543:Surface presentation of antigen (SpoA)	2	2.66667	0.0370663	P06974, P15070	75	2	3956	52.7467	0.992345	0.191262	0.171987
INTERPRO	IPR002495:Glycosyl transferase, family 8	2	2.66667	0.0370663	P27128, P27129	75	2	3956	52.7467	0.992345	0.191262	0.171987
INTERPRO	IPR002545:CheW-like protein	2	2.66667	0.0370663	P0A964, P07363	75	2	3956	52.7467	0.992345	0.191262	0.171987
INTERPRO	IPR001029:Flagellin, D0/D1 domain	2	2.66667	0.0370663	P04949, P29744	75	2	3956	52.7467	0.992345	0.191262	0.171987
GOTERM_BP_DIRECT	GO:0097588~archaeal or bacterial-type flagellum-dependent cell motility	2	2.66667	0.0404791	P22586, P0AF06	68	2	3277	48.1912	0.944562	0.202396	0.179265
GOTERM_BP_DIRECT	GO:0051649~establishment of localization in cell	2	2.66667	0.0404791	P0A964, P07363	68	2	3277	48.1912	0.944562	0.202396	0.179265
GOTERM_BP_DIRECT	GO:0051271~negative regulation of cellular component movement	2	2.66667	0.0404791	P75908, P31129	68	2	3277	48.1912	0.944562	0.202396	0.179265
GOTERM_CC_DIRECT	GO:0030694~bacterial-type flagellum basal body, rod	2	2.66667	0.0423908	P0ABW9, P0ABX2	64	2	2941	45.9531	0.661384	0.132471	0.132471
UP_SEQ_FEATURE	domain:PAC	2	2.66667	0.068599	P77302, P0AEC3	74	4	4147	28.0203	0.999425	0.605476	0.582627
UP_SEQ_FEATURE	topological domain:Cytoplasmic	16	21.3333	0.0724799	P07018, P30855, P30844, P40719, P05704, P76299, P39838, P50466, P0AF06, P75908, P39453, P0AEC3, P77172, P02942, P09348, P07017	74	575	4147	1.55939	0.999629	0.605476	0.582627
UP_KEYWORDS	Transferase	16	21.3333	0.0725542	P77302, P30855, P30844, P31129, P40719, P76330, P0AAP1, P0AA89, P39838, P75908, P39453, P0AEC3, P07363, P07364, P27128, P27129	75	566	4139	1.56005	0.991938	0.222747	0.170541
INTERPRO	IPR007895:MASE1	2	2.66667	0.0727765	P77172, P23842	75	4	3956	26.3733	0.999942	0.361083	0.324695
UP_KEYWORDS	Kinase	7	9.33333	0.073089	P39453, P0AEC3, P30855, P30844, P40719, P07363, P39838	75	165	4139	2.34125	0.99223	0.222747	0.170541
UP_SEQ_FEATURE	topological domain:Periplasmic	16	21.3333	0.0742564	P07018, P30855, P30844, P40719, P05704, P76299, P39838, P50466, P0AF06, P75908, P39453, P0AEC3, P77172, P02942, P09348, P07017	74	577	4147	1.55398	0.999697	0.605476	0.582627
GOTERM_MF_DIRECT	GO:0016772~transferase activity, transferring phosphorus-containing groups	2	2.66667	0.0775631	P39453, P30844	52	5	3186	24.5077	0.980862	0.316716	0.271471
SMART	SM00260:CheW	2	2.66667	0.0864843	P0A964, P07363	36	2	792	22	0.850364	0.201797	0.144141
INTERPRO	IPR000700:PAS-associated, C-terminal	2	2.66667	0.0901385	P77302, P0AEC3	75	5	3956	21.0987	0.999995	0.430662	0.387262
GOTERM_BP_DIRECT	GO:0048870~cell motility	2	2.66667	0.0981895	P37646, P02942	68	5	3277	19.2765	0.999279	0.458218	0.40585

## Sheet: DAVID_Output_SD300
Spectral Depth 300; Flagellum Module
Category	Term	Count	%	PValue	Genes	List Total	Pop Hits	Pop Total	Fold Enrichment	Bonferroni	Benjamini	FDR
KEGG_PATHWAY	eco02040:Flagellar assembly	31	93.9394	1.02e-57	P06974, P0AC05, P0ABW9, P75933, P33135, P52614, P52612, P75937, P52613, P75936, P0AF06, P0AEM4, P33235, P0AC07, P75938, P0ABX5, P15070, P0ABX2, P0A8T5, P0ABZ1, P29744, P76298, P76299, P04949, P31068, P0A6S3, P0A6S0, P26608, P22586, P09348, P25798	31	36	1564	43.4444	3.05e-57	3.05e-57	3.05e-57
UP_KEYWORDS	Bacterial flagellum	18	54.5455	7.64e-36	P06974, P0ABW9, P33135, P04949, P75937, P33235, P0AC07, P0A6S3, P75938, P0A6S0, P0ABX5, P22586, P15070, P0ABX2, P0A8T5, P0ABZ1, P25798, P29744	33	20	4139	112.882	2.37e-34	2.37e-34	2.06e-34
GOTERM_BP_DIRECT	GO:0071973~bacterial-type flagellum-dependent cell motility	20	60.6061	3.74e-34	P06974, P75933, P04949, P75942, P52614, P52612, P31068, P52613, P33235, P0A6S3, P75938, P0A6S0, P26608, P0ABX5, P15070, P09348, P0A8T5, P0ABZ1, P25798, P29744	33	30	3277	66.202	8.6e-33	8.23e-33	7.48e-33
UP_KEYWORDS	Bacterial flagellum biogenesis	12	36.3636	1.03e-20	P0AC05, P76298, P26608, P76299, P75933, P75942, P52614, P52612, P0AEM4, P31068, P52613, P75936	33	17	4139	88.5348	3.18e-19	1.59e-19	1.38e-19
GOTERM_CC_DIRECT	GO:0009425~bacterial-type flagellum basal body	11	33.3333	2.2e-19	P0AC05, P06974, P75938, P0ABX8, P22586, P33135, P15070, P75937, P0A8T5, P0ABZ1, P0AC07	32	12	2941	84.2474	4.17e-18	4.17e-18	3.73e-18
GOTERM_MF_DIRECT	GO:0003774~motor activity	8	24.2424	7.82e-17	P06974, P0A6S0, P15070, P31068, P52613, P0A8T5, P0ABZ1, P25798	16	8	3186	199.125	1.11e-15	7.82e-16	7.82e-16
GOTERM_BP_DIRECT	GO:0044780~bacterial-type flagellum assembly	10	30.303	1.13e-15	P76298, P26608, P76299, P33135, P75942, P52614, P52612, P0ABZ1, P33235, P0AC07	33	15	3277	66.202	2.55e-14	1.25e-14	1.13e-14
GOTERM_CC_DIRECT	GO:0009424~bacterial-type flagellum hook	9	27.2727	2.54e-15	P75938, P0ABW9, P0ABX5, P52614, P75937, P0ABX2, P75936, P33235, P29744	32	10	2941	82.7156	4.85e-14	2.41e-14	2.16e-14
GOTERM_BP_DIRECT	GO:0071978~bacterial-type flagellum-dependent swarming motility	8	24.2424	6.93e-12	P75938, P0ABW9, P0ABX8, P0ABX5, P09348, P75937, P0ABX2, P75936	33	13	3277	61.1096	1.59e-10	5.09e-11	4.62e-11
UP_KEYWORDS	Flagellar rotation	7	21.2121	1.08e-11	P06974, P0ABX8, P22586, P15070, P09348, P0AF06, P0ABZ1	33	9	4139	97.5522	3.34e-10	1.11e-10	9.69e-11
GOTERM_BP_DIRECT	GO:0044781~bacterial-type flagellum organization	7	21.2121	1.08e-10	P0AC05, P75933, P22586, P0AEM4, P31068, P52613, P75936	33	10	3277	69.5121	2.49e-09	5.95e-10	5.41e-10
UP_KEYWORDS	Bacterial flagellum protein export	6	18.1818	1.19e-10	P0AC05, P76298, P76299, P52612, P31068, P52613	33	6	4139	125.424	3.69e-09	8e-10	6.97e-10
UP_KEYWORDS	Chemotaxis	8	24.2424	1.29e-10	P06974, P0ABX8, P22586, P15070, P09348, P52613, P0AF06, P0ABZ1	33	22	4139	45.6088	4e-09	8e-10	6.97e-10
INTERPRO	IPR001444:Flagellar basal body rod protein, N-terminal	6	18.1818	1.49e-10	P75938, P0ABW9, P0ABX5, P75937, P0ABX2, P33235	33	6	3956	119.879	9.7e-09	9.7e-09	9.7e-09
INTERPRO	IPR010930:Flagellar basal-body/hook protein, C-terminal domain	5	15.1515	1.75e-08	P75938, P0ABX5, P75937, P0ABX2, P33235	33	5	3956	119.879	1.14e-06	3.8e-07	3.8e-07
INTERPRO	IPR019776:Flagellar basal body rod protein, conserved site	5	15.1515	1.75e-08	P75938, P0ABW9, P0ABX5, P75937, P0ABX2	33	5	3956	119.879	1.14e-06	3.8e-07	3.8e-07
GOTERM_BP_DIRECT	GO:0006935~chemotaxis	7	21.2121	3.54e-08	P0ABX8, P22586, P15070, P09348, P52613, P0AF06, P0ABZ1	33	22	3277	31.5964	8.14e-07	1.56e-07	1.42e-07
GOTERM_MF_DIRECT	GO:0005198~structural molecule activity	5	15.1515	4.22e-07	P0A6S3, P04949, P0A8T5, P33235, P29744	16	15	3186	66.375	4.22e-06	2.11e-06	2.11e-06
UP_KEYWORDS	Protein transport	6	18.1818	0.000158	P0AC05, P76298, P76299, P52612, P31068, P52613	33	69	4139	10.9065	0.00488534	0.000816	0.000711
INTERPRO	IPR020013:Fagellar hook-basal body protein, FlgE/F/G	3	9.09091	0.000189	P75938, P0ABX5, P75937	33	3	3956	119.879	0.0122268	0.00307526	0.00307526
GOTERM_BP_DIRECT	GO:0009306~protein secretion	4	12.1212	0.000286	P0AC05, P76298, P76299, P0AC07	33	14	3277	28.3723	0.00656529	0.00104994	0.000954
KEGG_PATHWAY	eco02030:Bacterial chemotaxis	5	15.1515	0.000431	P06974, P15070, P09348, P0AF06, P0ABZ1	31	20	1564	12.6129	0.00129344	0.000647	0.000647
UP_KEYWORDS	Secreted	3	9.09091	0.00250742	P04949, P33235, P29744	33	10	4139	37.6273	0.074876	0.0111043	0.00967146
GOTERM_CC_DIRECT	GO:0005576~extracellular region	3	9.09091	0.014814	P04949, P33235, P29744	32	18	2941	15.3177	0.246911	0.0938219	0.0839459
INTERPRO	IPR001029:Flagellin, D0/D1 domain	2	6.06061	0.0161145	P04949, P29744	33	2	3956	119.879	0.652148	0.174574	0.174574
INTERPRO	IPR001543:Surface presentation of antigen (SpoA)	2	6.06061	0.0161145	P06974, P15070	33	2	3956	119.879	0.652148	0.174574	0.174574
GOTERM_BP_DIRECT	GO:0097588~archaeal or bacterial-type flagellum-dependent cell motility	2	6.06061	0.0194377	P22586, P0AF06	33	2	3277	99.303	0.363307	0.0610898	0.0555361
GOTERM_CC_DIRECT	GO:0030694~bacterial-type flagellum basal body, rod	2	6.06061	0.0209737	P0ABW9, P0ABX2	32	2	2941	91.9062	0.331513	0.0996251	0.0891383
GOTERM_CC_DIRECT	GO:0009288~bacterial-type flagellum	2	6.06061	0.0415214	P31068, P52613	32	4	2941	45.9531	0.553249	0.157781	0.141173
UP_KEYWORDS	Cell membrane	14	42.4242	0.0421006	P06974, P0AC05, P76298, P0ABX8, P76299, P33135, P0AF06, P52613, P0AC07, P22586, P15070, P09348, P0ABZ1, P25798	33	1052	4139	1.66914	0.736417	0.153758	0.133918
UP_KEYWORDS	Membrane	15	45.4545	0.0446394	P06974, P0AC05, P76298, P0ABX8, P76299, P33135, P0AF06, P52613, P0AC07, P0A6S0, P22586, P15070, P09348, P0ABZ1, P25798	33	1174	4139	1.60252	0.757234	0.153758	0.133918
UP_KEYWORDS	Cell inner membrane	12	36.3636	0.0651747	P0AC05, P06974, P76298, P0ABX8, P76299, P33135, P15070, P09348, P0AF06, P0ABZ1, P25798, P0AC07	33	892	4139	1.68732	0.876222	0.202042	0.175972
UP_SEQ_FEATURE	signal peptide	8	24.2424	0.0878815	P0AC05, P0A6S3, P0A6S0, P0ABX8, P75933, P75936, P25798, P0AC07	33	508	4147	1.979	0.979003	1	1
UP_KEYWORDS	Hydrogen ion transport	2	6.06061	0.0961077	P09348, P52612	33	13	4139	19.296	0.956387	0.270849	0.235901
Spectral Depth 300; c-di-GMP signaling Module
Category	Term	Count	%	PValue	Genes	List Total	Pop Hits	Pop Total	Fold Enrichment	Bonferroni	Benjamini	FDR
INTERPRO	IPR001633:Diguanylate phosphodiesterase, EAL domain	11	64.7059	6.0244e-22	P75990, P76204, P76446, P75995, P13518, P37646, P77172, P75800, P23842, P76261, P37649	17	17	3956	150.574	7.83172e-21	7.83172e-21	7.83172e-21
UP_SEQ_FEATURE	domain:EAL	10	58.8235	5.71933e-20	P75990, P76204, P76446, P75995, P13518, P37646, P77172, P75800, P23842, P76261	16	16	4147	161.992	1.37264e-18	1.42983e-18	1.42983e-18
INTERPRO	IPR000160:GGDEF domain	10	58.8235	1.60209e-18	P75908, P77302, P31129, P13518, P76330, P0AAP1, P0AA89, P77172, P23842, P37649	17	19	3956	122.477	2.08272e-17	1.04136e-17	1.04136e-17
UP_SEQ_FEATURE	domain:GGDEF	8	47.0588	2.95896e-14	P75908, P77302, P31129, P13518, P76330, P0AAP1, P0AA89, P23842	16	17	4147	121.971	7.11431e-13	3.6987e-13	3.6987e-13
SMART	SM00052:DUF2	10	58.8235	1.68924e-13	P75990, P76446, P75995, P13518, P37646, P77172, P75800, P23842, P76261, P37649	16	16	792	30.9375	6.75904e-13	6.75697e-13	6.75697e-13
SMART	SM00267:DUF1	10	58.8235	1.33606e-12	P75908, P77302, P31129, P13518, P76330, P0AAP1, P0AA89, P77172, P23842, P37649	16	19	792	26.0526	5.34417e-12	2.67211e-12	2.67211e-12
GOTERM_MF_DIRECT	GO:0052621~diguanylate cyclase activity	6	35.2941	7.25194e-11	P75908, P77302, P31129, P76330, P0AAP1, P0AA89	13	10	3186	147.046	1.30535e-09	1.30535e-09	1.16031e-09
UP_KEYWORDS	GTP-binding	6	35.2941	6.73034e-07	P75908, P77302, P31129, P76330, P0AAP1, P0AA89	17	48	4139	30.4338	1.74987e-05	1.74989e-05	1.61528e-05
GOTERM_MF_DIRECT	GO:0005525~GTP binding	6	35.2941	7.62811e-07	P75908, P77302, P31129, P76330, P0AAP1, P0AA89	13	53	3186	27.7446	1.37305e-05	6.8653e-06	6.10248e-06
GOTERM_MF_DIRECT	GO:0071111~cyclic-guanylate-specific phosphodiesterase activity	4	23.5294	3.38838e-06	P37646, P77172, P75800, P76261	13	9	3186	108.923	6.0989e-05	2.03303e-05	1.80713e-05
UP_KEYWORDS	c-di-GMP	4	23.5294	1.32459e-05	P37646, P77172, P75800, P76261	17	13	4139	74.914	0.000344337	0.000172197	0.000158951
INTERPRO	IPR024744:Putative cyclic diguanylate phosphodiesterase, CSS motif-containing domain	3	17.6471	0.00015231	P76446, P75995, P76261	17	5	3956	139.624	0.00197823	0.000660012	0.000660012
GOTERM_CC_DIRECT	GO:0005886~plasma membrane	9	52.9412	0.00129246	P75908, P76446, P75995, P13518, P76330, P0AAP1, P77172, P23842, P37649	10	1021	2941	2.59246	0.00515983	0.00516984	0.00516984
UP_KEYWORDS	Nucleotide-binding	8	47.0588	0.00130274	P75908, P77302, P31129, P76330, P0AAP1, P0AA89, P37646, P77172	17	486	4139	4.00775	0.0333253	0.0112904	0.0104219
UP_KEYWORDS	Magnesium	6	35.2941	0.00194433	P75908, P77302, P31129, P76330, P0AAP1, P0AA89	17	250	4139	5.84329	0.0493427	0.0126381	0.011666
GOTERM_BP_DIRECT	GO:0051271~negative regulation of cellular component movement	2	11.7647	0.00670321	P75908, P31129	12	2	3277	273.083	0.143322	0.147471	0.147471
GOTERM_CC_DIRECT	GO:0016021~integral component of membrane	7	41.1765	0.00692554	P75908, P76446, P13518, P76330, P0AAP1, P77172, P37649	10	687	2941	2.99665	0.0274157	0.0138511	0.0138511
INTERPRO	IPR007895:MASE1	2	11.7647	0.0160861	P77172, P23842	17	4	3956	116.353	0.19008	0.0522799	0.0522799
GOTERM_BP_DIRECT	GO:0043433~negative regulation of sequence-specific DNA binding transcription factor activity	2	11.7647	0.0199872	P75990, P76204	12	6	3277	91.0278	0.371464	0.170741	0.170741
GOTERM_MF_DIRECT	GO:0046872~metal ion binding	5	29.4118	0.0207331	P75908, P77302, P76330, P0AAP1, P0AA89	13	300	3186	4.08462	0.314166	0.093299	0.0829324
GOTERM_BP_DIRECT	GO:1902201~negative regulation of bacterial-type flagellum-dependent cell motility	2	11.7647	0.0232829	P76204, P76330	12	7	3277	78.0238	0.418323	0.170741	0.170741
UP_KEYWORDS	Transferase	6	35.2941	0.0564008	P75908, P77302, P31129, P76330, P0AAP1, P0AA89	17	566	4139	2.58096	0.778957	0.293284	0.270724
UP_KEYWORDS	Metal-binding	6	35.2941	0.082348	P75908, P77302, P31129, P76330, P0AAP1, P0AA89	17	629	4139	2.32245	0.89294	0.356841	0.329392
Spectral Depth 300; Chemotaxis Signaling Module
Category	Term	Count	%	PValue	Genes	List Total	Pop Hits	Pop Total	Fold Enrichment	Bonferroni	Benjamini	FDR
UP_KEYWORDS	Chemotaxis	9	64.2857	1.90694e-16	P0A964, P07018, P05704, P07330, P07363, P02942, P07364, P50466, P07017	14	22	4139	120.945	5.32907e-15	4.57667e-15	4.57667e-15
KEGG_PATHWAY	eco02020:Two-component system	14	100	2.47906e-14	P07018, P30855, P30844, P05704, P39838, P50466, P0A964, P39453, P0AEC3, P07363, P07330, P02942, P07364, P07017	14	146	1564	10.7123	7.42739e-14	7.43717e-14	7.43717e-14
KEGG_PATHWAY	eco02030:Bacterial chemotaxis	9	64.2857	1.79601e-13	P0A964, P07018, P05704, P07330, P07363, P02942, P07364, P50466, P07017	14	20	1564	50.2714	5.38902e-13	2.69402e-13	2.69402e-13
GOTERM_BP_DIRECT	GO:0006935~chemotaxis	8	57.1429	3.57053e-13	P0A964, P07018, P05704, P07330, P07363, P02942, P07364, P07017	14	22	3277	85.1169	7.85505e-12	7.49811e-12	7.49811e-12
INTERPRO	IPR003660:HAMP linker domain	7	50	2.35611e-11	P07018, P39453, P30844, P05704, P02942, P50466, P07017	14	22	3956	89.9091	7.06831e-10	7.06832e-10	7.06832e-10
UP_SEQ_FEATURE	domain:Methyl-accepting transducer	5	35.7143	2.90018e-10	P07018, P05704, P02942, P50466, P07017	14	5	4147	296.214	9.8606e-09	1.01506e-08	1.01506e-08
UP_KEYWORDS	Transducer	5	35.7143	2.92266e-10	P07018, P05704, P02942, P50466, P07017	14	5	4139	295.643	7.01439e-09	3.50719e-09	3.50719e-09
INTERPRO	IPR004090:Chemotaxis methyl-accepting receptor	5	35.7143	3.5021e-10	P07018, P05704, P02942, P50466, P07017	14	5	3956	282.571	1.05063e-08	3.5021e-09	3.5021e-09
INTERPRO	IPR004089:Methyl-accepting chemotaxis protein (MCP) signalling domain	5	35.7143	3.5021e-10	P07018, P05704, P02942, P50466, P07017	14	5	3956	282.571	1.05063e-08	3.5021e-09	3.5021e-09
UP_SEQ_FEATURE	domain:HPt	5	35.7143	8.6854e-10	P39453, P0AEC3, P30855, P07363, P39838	14	6	4147	246.845	2.95304e-08	1.51995e-08	1.51995e-08
INTERPRO	IPR008207:Signal transduction histidine kinase, phosphotransfer (Hpt) domain	5	35.7143	1.04872e-09	P39453, P0AEC3, P30855, P07363, P39838	14	6	3956	235.476	3.14615e-08	7.86538e-09	7.86538e-09
UP_SEQ_FEATURE	domain:HAMP	6	42.8571	1.43495e-09	P07018, P39453, P30844, P05704, P02942, P07017	14	19	4147	93.5414	4.87884e-08	1.67411e-08	1.67411e-08
INTERPRO	IPR005467:Signal transduction histidine kinase, core	6	42.8571	1.51057e-08	P39453, P0AEC3, P30855, P30844, P07363, P39838	14	28	3956	60.551	4.53172e-07	9.06344e-08	9.06344e-08
INTERPRO	IPR003594:Histidine kinase-like ATPase, ATP-binding domain	6	42.8571	4.23352e-08	P39453, P0AEC3, P30855, P30844, P07363, P39838	14	34	3956	49.8655	1.27006e-06	2.11676e-07	2.11676e-07
INTERPRO	IPR003122:Chemotaxis methyl-accepting receptor, ligand-binding	4	28.5714	1.10742e-07	P07018, P05704, P02942, P07017	14	4	3956	282.571	3.32226e-06	4.15283e-07	4.15283e-07
INTERPRO	IPR004091:Chemotaxis methyl-accepting receptor, methyl-accepting site	4	28.5714	1.10742e-07	P07018, P05704, P02942, P07017	14	4	3956	282.571	3.32226e-06	4.15283e-07	4.15283e-07
GOTERM_MF_DIRECT	GO:0004888~transmembrane signaling receptor activity	4	28.5714	2.11946e-07	P07018, P05704, P02942, P07017	14	4	3186	227.571	3.39112e-06	3.39113e-06	2.96724e-06
SMART	SM00283:MA	5	35.7143	2.17718e-07	P07018, P05704, P02942, P50466, P07017	14	5	792	56.5714	2.83034e-06	2.83034e-06	2.83034e-06
GOTERM_BP_DIRECT	GO:0007165~signal transduction	4	28.5714	4.8584e-07	P0A964, P05704, P02942, P50466	14	5	3277	187.257	1.06884e-05	5.10132e-06	5.10132e-06
UP_KEYWORDS	Methylation	5	35.7143	7.14071e-07	P07018, P05704, P02942, P50466, P07017	14	25	4139	59.1286	1.71376e-05	5.71256e-06	5.71256e-06
INTERPRO	IPR004358:Signal transduction histidine kinase-related protein, C-terminal	5	35.7143	7.18889e-07	P39453, P0AEC3, P30855, P30844, P07363	14	24	3956	58.869	2.15664e-05	2.3963e-06	2.3963e-06
INTERPRO	IPR003661:Signal transduction histidine kinase, subgroup 1, dimerisation/phosphoacceptor domain	5	35.7143	8.54256e-07	P39453, P0AEC3, P30855, P30844, P07363	14	25	3956	56.5143	2.56274e-05	2.56277e-06	2.56277e-06
UP_SEQ_FEATURE	domain:Histidine kinase	5	35.7143	9.79688e-07	P39453, P0AEC3, P30855, P30844, P07363	14	27	4147	54.8545	3.33089e-05	8.57227e-06	8.57227e-06
GOTERM_MF_DIRECT	GO:0009927~histidine phosphotransfer kinase activity	4	28.5714	1.05474e-06	P39453, P0AEC3, P30855, P39838	14	6	3186	151.714	1.68757e-05	8.43791e-06	7.38318e-06
UP_KEYWORDS	Two-component regulatory system	6	42.8571	1.19948e-06	P39453, P0AEC3, P30855, P30844, P07363, P39838	14	68	4139	26.0861	2.87871e-05	7.19687e-06	7.19687e-06
GOTERM_BP_DIRECT	GO:0018106~peptidyl-histidine phosphorylation	5	35.7143	1.51572e-06	P39453, P0AEC3, P30855, P30844, P39838	14	24	3277	48.7649	3.33453e-05	1.061e-05	1.061e-05
UP_KEYWORDS	Phosphoprotein	7	50	1.74527e-06	P39453, P0AEC3, P30855, P30844, P07330, P07363, P39838	14	138	4139	14.9964	4.18856e-05	8.3773e-06	8.3773e-06
SMART	SM00304:HAMP	6	42.8571	1.99571e-06	P07018, P39453, P30844, P05704, P02942, P07017	14	16	792	21.2143	2.59439e-05	1.29721e-05	1.29721e-05
GOTERM_BP_DIRECT	GO:0000160~phosphorelay signal transduction system	6	42.8571	4.34155e-06	P39453, P0AEC3, P30855, P30844, P07363, P39838	14	70	3277	20.0633	9.55098e-05	2.27931e-05	2.27931e-05
GOTERM_MF_DIRECT	GO:0004871~signal transducer activity	4	28.5714	4.39865e-06	P0A964, P07018, P50466, P07017	14	9	3186	101.143	7.03761e-05	2.34595e-05	2.0527e-05
GOTERM_MF_DIRECT	GO:0000155~phosphorelay sensor kinase activity	5	35.7143	6.3928e-06	P39453, P0AEC3, P30855, P30844, P07363	14	33	3186	34.4805	0.00010228	2.55712e-05	2.23748e-05
UP_SEQ_FEATURE	topological domain:Cytoplasmic	10	71.4286	7.59275e-06	P07018, P39453, P0AEC3, P30855, P30844, P05704, P39838, P02942, P50466, P07017	14	575	4147	5.15155	0.000258121	4.56168e-05	4.56168e-05
UP_SEQ_FEATURE	topological domain:Periplasmic	10	71.4286	7.82002e-06	P07018, P39453, P0AEC3, P30855, P30844, P05704, P39838, P02942, P50466, P07017	14	577	4147	5.1337	0.000265846	4.56168e-05	4.56168e-05
SMART	SM00319:TarH	4	28.5714	1.37373e-05	P07018, P05704, P02942, P07017	14	4	792	56.5714	0.00017857	5.95282e-05	5.95282e-05
SMART	SM00073:HPT	4	28.5714	3.40166e-05	P39453, P0AEC3, P30855, P07363	14	5	792	45.2571	0.000442126	0.000110554	0.000110554
SMART	SM00387:HATPase_c	6	42.8571	8.01265e-05	P39453, P0AEC3, P30855, P30844, P07363, P39838	14	32	792	10.6071	0.00104114	0.000208329	0.000208329
UP_KEYWORDS	Kinase	6	42.8571	9.40613e-05	P39453, P0AEC3, P30855, P30844, P07363, P39838	14	165	4139	10.7506	0.00225503	0.000376245	0.000376245
GOTERM_BP_DIRECT	GO:0046777~protein autophosphorylation	4	28.5714	9.41371e-05	P39453, P0AEC3, P30855, P07363	14	24	3277	39.0119	0.00206897	0.00037355	0.00037355
GOTERM_BP_DIRECT	GO:0023014~signal transduction by protein phosphorylation	4	28.5714	0.000106729	P39453, P0AEC3, P30855, P30844	14	25	3277	37.4514	0.0023454	0.00037355	0.00037355
UP_SEQ_FEATURE	domain:Response regulatory	4	28.5714	0.000175902	P39453, P0AEC3, P30855, P07330	14	37	4147	32.0232	0.00596334	0.00087951	0.00087951
INTERPRO	IPR001789:Signal transduction response regulator, receiver domain	4	28.5714	0.000202033	P39453, P0AEC3, P30855, P07330	14	37	3956	30.5483	0.00604327	0.000550999	0.000550999
GOTERM_CC_DIRECT	GO:0005622~intracellular	5	35.7143	0.00021097	P39453, P0AEC3, P30855, P30844, P39838	14	73	2941	14.3885	0.00126515	0.000934177	0.000934177
INTERPRO	IPR011006:CheY-like superfamily	4	28.5714	0.000236726	P39453, P0AEC3, P30855, P07330	14	39	3956	28.9817	0.00707746	0.000591815	0.000591815
UP_SEQ_FEATURE	transmembrane region	10	71.4286	0.000249695	P07018, P39453, P0AEC3, P30855, P30844, P05704, P39838, P02942, P50466, P07017	14	875	4147	3.38531	0.00845475	0.00109242	0.00109242
UP_KEYWORDS	Transmembrane helix	10	71.4286	0.000296389	P07018, P39453, P0AEC3, P30855, P30844, P05704, P39838, P02942, P50466, P07017	14	892	4139	3.31438	0.00708915	0.000889168	0.000889168
UP_KEYWORDS	Cell inner membrane	10	71.4286	0.000296389	P07018, P39453, P0AEC3, P30855, P30844, P05704, P39838, P02942, P50466, P07017	14	892	4139	3.31438	0.00708915	0.000889168	0.000889168
GOTERM_CC_DIRECT	GO:0005886~plasma membrane	12	85.7143	0.000311392	P07018, P39453, P0AEC3, P30855, P30844, P05704, P07330, P07363, P39838, P02942, P07364, P50466	14	1021	2941	2.46901	0.0018669	0.000934177	0.000934177
UP_KEYWORDS	Transmembrane	10	71.4286	0.000436851	P07018, P39453, P0AEC3, P30855, P30844, P05704, P39838, P02942, P50466, P07017	14	936	4139	3.15858	0.0104319	0.00116494	0.00116494
UP_KEYWORDS	Cell membrane	10	71.4286	0.00110539	P07018, P39453, P0AEC3, P30855, P30844, P05704, P39838, P02942, P50466, P07017	14	1052	4139	2.81029	0.0261948	0.00265294	0.00265294
UP_KEYWORDS	Membrane	10	71.4286	0.00259356	P07018, P39453, P0AEC3, P30855, P30844, P05704, P39838, P02942, P50466, P07017	14	1174	4139	2.51825	0.0604237	0.00565867	0.00565867
SMART	SM00388:HisKA	4	28.5714	0.00335872	P39453, P0AEC3, P30855, P30844	14	20	792	11.3143	0.0427941	0.00727722	0.00727722
UP_KEYWORDS	Transferase	7	50	0.0046551	P39453, P0AEC3, P30855, P30844, P07363, P39838, P07364	14	566	4139	3.65636	0.105941	0.0093102	0.0093102
UP_KEYWORDS	ATP-binding	6	42.8571	0.00624155	P39453, P0AEC3, P30855, P30844, P07363, P39838	14	412	4139	4.30548	0.139522	0.0115229	0.0115229
UP_SEQ_FEATURE	region of interest:The 3 Arg may form a positively charged pocket, which binds the alpha-carboxyl group of the attractant AA	2	14.2857	0.00626052	P02942, P07017	14	2	4147	296.214	0.192269	0.0219118	0.0219118
UP_SEQ_FEATURE	domain:CheW-like	2	14.2857	0.00626052	P0A964, P07363	14	2	4147	296.214	0.192269	0.0219118	0.0219118
INTERPRO	IPR002545:CheW-like protein	2	14.2857	0.00656232	P0A964, P07363	14	2	3956	282.571	0.179235	0.0151438	0.0151438
GOTERM_BP_DIRECT	GO:0051649~establishment of localization in cell	2	14.2857	0.00791955	P0A964, P07363	14	2	3277	234.071	0.160479	0.0237587	0.0237587
GOTERM_MF_DIRECT	GO:0043424~protein histidine kinase binding	2	14.2857	0.00814533	P02942, P07017	14	2	3186	227.571	0.122658	0.0260651	0.0228069
UP_KEYWORDS	Nucleotide-binding	6	42.8571	0.0125875	P39453, P0AEC3, P30855, P30844, P07363, P39838	14	486	4139	3.64991	0.262153	0.0215786	0.0215786
GOTERM_CC_DIRECT	GO:0005887~integral component of plasma membrane	6	42.8571	0.0135714	P07018, P39453, P05704, P39838, P02942, P07017	14	352	2941	3.58076	0.0787151	0.0271428	0.0271428
SMART	SM00448:REC	4	28.5714	0.0194345	P39453, P0AEC3, P30855, P07330	14	37	792	6.11583	0.225189	0.0360926	0.0360926
GOTERM_MF_DIRECT	GO:0016772~transferase activity, transferring phosphorus-containing groups	2	14.2857	0.0202486	P39453, P30844	14	5	3186	91.0286	0.279134	0.052282	0.0457468
GOTERM_MF_DIRECT	GO:0005524~ATP binding	6	42.8571	0.0228734	P39453, P0AEC3, P30855, P30844, P07363, P39838	14	433	3186	3.15341	0.309421	0.052282	0.0457468
SMART	SM00260:CheW	2	14.2857	0.0325793	P0A964, P07363	14	2	792	56.5714	0.34987	0.0529413	0.0529413
INTERPRO	IPR000014:PAS domain	2	14.2857	0.0451088	P0AEC3, P50466	14	14	3956	40.3673	0.74961	0.0966616	0.0966616
GOTERM_CC_DIRECT	GO:0016021~integral component of membrane	7	50	0.0596786	P07018, P39453, P0AEC3, P30855, P30844, P05704, P50466	14	687	2941	2.14047	0.308714	0.0895178	0.0895178
Spectral Depth 300; LPS Biosynthesis Module
Category	Term	Count	%	PValue	Genes	List Total	Pop Hits	Pop Total	Fold Enrichment	Bonferroni	Benjamini	FDR
INTERPRO	IPR013645:Glycosyl transferase, family 8, C-terminal	2	100	0.000505561	P27128, P27129	2	2	3956	1978	0.00101087	0.000505561	0.000505561
INTERPRO	IPR002495:Glycosyl transferase, family 8	2	100	0.000505561	P27128, P27129	2	2	3956	1978	0.00101087	0.000505561	0.000505561
GOTERM_MF_DIRECT	GO:0008918~lipopolysaccharide 3-alpha-galactosyltransferase activity	2	100	0.000627746	P27128, P27129	2	2	3186	1593	0.00188206	0.00188324	0.00188324
GOTERM_BP_DIRECT	GO:0009244~lipopolysaccharide core region biosynthetic process	2	100	0.00732377	P27128, P27129	2	24	3277	136.542	0.00732377	0.00732377	0.00732377
UP_KEYWORDS	Glycosyltransferase	2	100	0.0132882	P27128, P27129	2	55	4139	75.2545	0.0393373	0.0239188	0.0159459
UP_KEYWORDS	Lipopolysaccharide biosynthesis	2	100	0.0159459	P27128, P27129	2	66	4139	62.7121	0.0470789	0.0239188	0.0159459
KEGG_PATHWAY	eco00540:Lipopolysaccharide biosynthesis	2	100	0.019821	P27128, P27129	2	31	1564	50.4516	0.0392491	0.0396419	0.0396419
COG_ONTOLOGY	Cell envelope biogenesis, outer membrane	2	100	0.0634921	P27128, P27129	2	40	630	15.75	0.122953	0.0634921	0.0634921

## Sheet: DAVID_Output_SD1000
Spectral Depth 1000; Chemoreception Module
Category	Term	Count	%	PValue	Genes	List Total	Pop Hits	Pop Total	Fold Enrichment	Bonferroni	Benjamini	FDR
UP_SEQ_FEATURE	domain:Methyl-accepting transducer	5	100	4.06325e-13	P07018, P05704, P02942, P50466, P07017	5	5	4147	829.4	4.06342e-12	4.46958e-12	4.46958e-12
UP_KEYWORDS	Transducer	5	100	4.09477e-13	P07018, P05704, P02942, P50466, P07017	5	5	4139	827.8	4.0945e-12	4.09477e-12	4.09477e-12
INTERPRO	IPR004090:Chemotaxis methyl-accepting receptor	5	100	4.90699e-13	P07018, P05704, P02942, P50466, P07017	5	5	3956	791.2	3.92575e-12	1.9628e-12	1.9628e-12
INTERPRO	IPR004089:Methyl-accepting chemotaxis protein (MCP) signalling domain	5	100	4.90699e-13	P07018, P05704, P02942, P50466, P07017	5	5	3956	791.2	3.92575e-12	1.9628e-12	1.9628e-12
SMART	SM00283:MA	5	100	3.07309e-10	P07018, P05704, P02942, P50466, P07017	5	5	792	158.4	1.22924e-09	1.22924e-09	1.22924e-09
UP_KEYWORDS	Chemotaxis	5	100	5.99065e-10	P07018, P05704, P02942, P50466, P07017	5	22	4139	188.136	5.99065e-09	2.99532e-09	2.99532e-09
INTERPRO	IPR003660:HAMP linker domain	5	100	7.17892e-10	P07018, P05704, P02942, P50466, P07017	5	22	3956	179.818	5.74314e-09	1.91438e-09	1.91438e-09
UP_KEYWORDS	Methylation	5	100	1.03598e-09	P07018, P05704, P02942, P50466, P07017	5	25	4139	165.56	1.03598e-08	3.45325e-09	3.45325e-09
INTERPRO	IPR003122:Chemotaxis methyl-accepting receptor, ligand-binding	4	80	1.55149e-09	P07018, P05704, P02942, P07017	5	4	3956	791.2	1.24119e-08	2.48239e-09	2.48239e-09
INTERPRO	IPR004091:Chemotaxis methyl-accepting receptor, methyl-accepting site	4	80	1.55149e-09	P07018, P05704, P02942, P07017	5	4	3956	791.2	1.24119e-08	2.48239e-09	2.48239e-09
GOTERM_MF_DIRECT	GO:0004888~transmembrane signaling receptor activity	4	80	2.97058e-09	P07018, P05704, P02942, P07017	5	4	3186	637.2	1.48529e-08	1.48529e-08	1.48529e-08
KEGG_PATHWAY	eco02030:Bacterial chemotaxis	5	100	1.95086e-08	P07018, P05704, P02942, P50466, P07017	5	20	1564	78.2	3.90171e-08	3.90171e-08	3.90171e-08
SMART	SM00319:TarH	4	80	1.93789e-07	P07018, P05704, P02942, P07017	5	4	792	158.4	7.75156e-07	3.87578e-07	3.87578e-07
UP_SEQ_FEATURE	domain:HAMP	4	80	3.25378e-07	P07018, P05704, P02942, P07017	5	19	4147	174.611	3.25377e-06	1.78958e-06	1.78958e-06
GOTERM_BP_DIRECT	GO:0006935~chemotaxis	4	80	1.04666e-06	P07018, P05704, P02942, P07017	5	22	3277	119.164	6.27995e-06	5.2333e-06	5.2333e-06
GOTERM_BP_DIRECT	GO:0007165~signal transduction	3	60	1.11643e-05	P05704, P02942, P50466	5	5	3277	393.24	6.69837e-05	2.79107e-05	2.79107e-05
SMART	SM00304:HAMP	4	80	2.68207e-05	P07018, P05704, P02942, P07017	5	16	792	39.6	0.000107279	3.5761e-05	3.5761e-05
GOTERM_MF_DIRECT	GO:0004871~signal transducer activity	3	60	4.24477e-05	P07018, P50466, P07017	5	9	3186	212.4	0.000212221	0.000106119	0.000106119
KEGG_PATHWAY	eco02020:Two-component system	5	100	7.31374e-05	P07018, P05704, P02942, P50466, P07017	5	146	1564	10.7123	0.00014627	7.31374e-05	7.31374e-05
UP_SEQ_FEATURE	topological domain:Cytoplasmic	5	100	0.000366288	P07018, P05704, P02942, P50466, P07017	5	575	4147	7.21217	0.00365685	0.00102142	0.00102142
UP_SEQ_FEATURE	topological domain:Periplasmic	5	100	0.000371424	P07018, P05704, P02942, P50466, P07017	5	577	4147	7.18718	0.00370804	0.00102142	0.00102142
UP_SEQ_FEATURE	region of interest:The 3 Arg may form a positively charged pocket, which binds the alpha-carboxyl group of the attractant AA	2	40	0.00192841	P02942, P07017	5	2	4147	829.4	0.0191176	0.00361397	0.00361397
UP_SEQ_FEATURE	transmembrane region	5	100	0.00197125	P07018, P05704, P02942, P50466, P07017	5	875	4147	4.73943	0.0195386	0.00361397	0.00361397
UP_KEYWORDS	Cell inner membrane	5	100	0.00214577	P07018, P05704, P02942, P50466, P07017	5	892	4139	4.64013	0.0212516	0.00429153	0.00429153
UP_KEYWORDS	Transmembrane helix	5	100	0.00214577	P07018, P05704, P02942, P50466, P07017	5	892	4139	4.64013	0.0212516	0.00429153	0.00429153
GOTERM_MF_DIRECT	GO:0043424~protein histidine kinase binding	2	40	0.0025098	P02942, P07017	5	2	3186	637.2	0.0124862	0.004183	0.004183
UP_KEYWORDS	Transmembrane	5	100	0.00260234	P07018, P05704, P02942, P50466, P07017	5	936	4139	4.42201	0.0257208	0.00433723	0.00433723
UP_KEYWORDS	Cell membrane	5	100	0.00415558	P07018, P05704, P02942, P50466, P07017	5	1052	4139	3.93441	0.0407872	0.00593654	0.00593654
GOTERM_CC_DIRECT	GO:0005887~integral component of plasma membrane	4	80	0.00620027	P07018, P05704, P02942, P07017	5	352	2941	6.68409	0.0184857	0.0186008	0.0124005
UP_KEYWORDS	Membrane	5	100	0.00644909	P07018, P05704, P02942, P50466, P07017	5	1174	4139	3.52555	0.0626512	0.00806137	0.00806137
Spectral Depth 1000; Chemotransmission Module
Category	Term	Count	%	PValue	Genes	List Total	Pop Hits	Pop Total	Fold Enrichment	Bonferroni	Benjamini	FDR
UP_KEYWORDS	Chemotaxis	3	100	2.69747e-05	P0A964, P07330, P07364	3	22	4139	188.136	0.000188807	0.000188823	0.000188823
GOTERM_BP_DIRECT	GO:0006935~chemotaxis	3	100	4.3035e-05	P0A964, P07330, P07364	3	22	3277	148.955	0.000172129	0.000129105	0.000129105
KEGG_PATHWAY	eco02030:Bacterial chemotaxis	3	100	0.000155449	P0A964, P07330, P07364	3	20	1564	78.2	0.000310874	0.000310898	0.000310898
KEGG_PATHWAY	eco02020:Two-component system	3	100	0.00866014	P0A964, P07330, P07364	3	146	1564	10.7123	0.0172453	0.00866014	0.00866014
Spectral Depth 1000; Signal transduction Module
Category	Term	Count	%	PValue	Genes	List Total	Pop Hits	Pop Total	Fold Enrichment	Bonferroni	Benjamini	FDR
UP_SEQ_FEATURE	domain:HPt	5	71.4286	1.82705e-11	P39453, P0AEC3, P30855, P07363, P39838	7	6	4147	493.69	3.8368e-10	4.01952e-10	2.92328e-10
INTERPRO	IPR008207:Signal transduction histidine kinase, phosphotransfer (Hpt) domain	5	71.4286	2.20635e-11	P39453, P0AEC3, P30855, P07363, P39838	7	6	3956	470.952	3.97144e-10	3.97144e-10	3.97144e-10
INTERPRO	IPR005467:Signal transduction histidine kinase, core	6	85.7143	7.28623e-11	P39453, P0AEC3, P30855, P30844, P07363, P39838	7	28	3956	121.102	1.31152e-09	6.5576e-10	6.5576e-10
INTERPRO	IPR003594:Histidine kinase-like ATPase, ATP-binding domain	6	85.7143	2.06029e-10	P39453, P0AEC3, P30855, P30844, P07363, P39838	7	34	3956	99.7311	3.70853e-09	1.23618e-09	1.23618e-09
UP_KEYWORDS	Two-component regulatory system	6	85.7143	6.11497e-09	P39453, P0AEC3, P30855, P30844, P07363, P39838	7	68	4139	52.1723	1.03954e-07	1.03954e-07	8.56095e-08
INTERPRO	IPR004358:Signal transduction histidine kinase-related protein, C-terminal	5	71.4286	1.55161e-08	P39453, P0AEC3, P30855, P30844, P07363	7	24	3956	117.738	2.7929e-07	6.64705e-08	6.64705e-08
INTERPRO	IPR003661:Signal transduction histidine kinase, subgroup 1, dimerisation/phosphoacceptor domain	5	71.4286	1.8464e-08	P39453, P0AEC3, P30855, P30844, P07363	7	25	3956	113.029	3.32352e-07	6.64705e-08	6.64705e-08
UP_SEQ_FEATURE	domain:Histidine kinase	5	71.4286	2.12034e-08	P39453, P0AEC3, P30855, P30844, P07363	7	27	4147	109.709	4.45272e-07	2.33238e-07	1.69627e-07
GOTERM_BP_DIRECT	GO:0000160~phosphorelay signal transduction system	6	85.7143	2.27468e-08	P39453, P0AEC3, P30855, P30844, P07363, P39838	7	70	3277	40.1265	4.32189e-07	2.96175e-07	2.96175e-07
GOTERM_BP_DIRECT	GO:0018106~peptidyl-histidine phosphorylation	5	71.4286	3.29083e-08	P39453, P0AEC3, P30855, P30844, P39838	7	24	3277	97.5298	6.25257e-07	2.96175e-07	2.96175e-07
GOTERM_MF_DIRECT	GO:0009927~histidine phosphotransfer kinase activity	4	57.1429	7.41244e-08	P39453, P0AEC3, P30855, P39838	7	6	3186	303.429	7.41244e-07	7.05809e-07	7.05809e-07
GOTERM_MF_DIRECT	GO:0000155~phosphorelay sensor kinase activity	5	71.4286	1.41162e-07	P39453, P0AEC3, P30855, P30844, P07363	7	33	3186	68.961	1.41162e-06	7.05809e-07	7.05809e-07
UP_KEYWORDS	Phosphoprotein	6	85.7143	2.24129e-07	P39453, P0AEC3, P30855, P30844, P07363, P39838	7	138	4139	25.7081	3.81019e-06	1.9051e-06	1.5689e-06
SMART	SM00387:HATPase_c	6	85.7143	4.57732e-07	P39453, P0AEC3, P30855, P30844, P07363, P39838	7	32	792	21.2143	4.11958e-06	4.11959e-06	4.11959e-06
UP_KEYWORDS	Kinase	6	85.7143	5.51242e-07	P39453, P0AEC3, P30855, P30844, P07363, P39838	7	165	4139	21.5013	9.37107e-06	3.1237e-06	2.57246e-06
KEGG_PATHWAY	eco02020:Two-component system	7	100	6.02111e-07	P0A964, P39453, P0AEC3, P30855, P30844, P07363, P39838	7	146	1564	10.7123	1.80633e-06	1.80633e-06	1.80633e-06
SMART	SM00073:HPT	4	57.1429	2.41085e-06	P39453, P0AEC3, P30855, P07363	7	5	792	90.5143	2.16975e-05	1.08488e-05	1.08488e-05
GOTERM_CC_DIRECT	GO:0005622~intracellular	5	71.4286	5.05281e-06	P39453, P0AEC3, P30855, P30844, P39838	7	73	2941	28.7769	3.03165e-05	3.03169e-05	3.03169e-05
GOTERM_BP_DIRECT	GO:0046777~protein autophosphorylation	4	57.1429	6.80891e-06	P39453, P0AEC3, P30855, P07363	7	24	3277	78.0238	0.000129361	3.47943e-05	3.47943e-05
GOTERM_BP_DIRECT	GO:0023014~signal transduction by protein phosphorylation	4	57.1429	7.73206e-06	P39453, P0AEC3, P30855, P30844	7	25	3277	74.9029	0.000146899	3.47943e-05	3.47943e-05
UP_KEYWORDS	ATP-binding	6	85.7143	5.26565e-05	P39453, P0AEC3, P30855, P30844, P07363, P39838	7	412	4139	8.61096	0.000894784	0.00022379	0.000184298
UP_KEYWORDS	Nucleotide-binding	6	85.7143	0.000118754	P39453, P0AEC3, P30855, P30844, P07363, P39838	7	486	4139	7.29982	0.0020169	0.000403764	0.000332511
GOTERM_MF_DIRECT	GO:0005524~ATP binding	6	85.7143	0.00024211	P39453, P0AEC3, P30855, P30844, P07363, P39838	7	433	3186	6.30683	0.00241847	0.000807034	0.000807034
UP_KEYWORDS	Transferase	6	85.7143	0.000250607	P39453, P0AEC3, P30855, P30844, P07363, P39838	7	566	4139	6.26805	0.00425179	0.000710054	0.00058475
SMART	SM00388:HisKA	4	57.1429	0.000263229	P39453, P0AEC3, P30855, P30844	7	20	792	22.6286	0.00236656	0.000789686	0.000789686
UP_SEQ_FEATURE	domain:Response regulatory	3	42.8571	0.00113614	P39453, P0AEC3, P30855	7	37	4147	48.0347	0.0235899	0.00833172	0.00605943
INTERPRO	IPR001789:Signal transduction response regulator, receiver domain	3	42.8571	0.00124715	P39453, P0AEC3, P30855	7	37	3956	45.8224	0.0222123	0.00356328	0.00356328
INTERPRO	IPR011006:CheY-like superfamily	3	42.8571	0.00138572	P39453, P0AEC3, P30855	7	39	3956	43.4725	0.0246513	0.00356328	0.00356328
UP_SEQ_FEATURE	domain:CheW-like	2	28.5714	0.00289191	P0A964, P07363	7	2	4147	592.429	0.0590057	0.0159055	0.0115677
INTERPRO	IPR002545:CheW-like protein	2	28.5714	0.00303145	P0A964, P07363	7	2	3956	565.143	0.0531825	0.00682076	0.00682076
GOTERM_BP_DIRECT	GO:0051649~establishment of localization in cell	2	28.5714	0.00365909	P0A964, P07363	7	2	3277	468.143	0.06728	0.0131727	0.0131727
UP_SEQ_FEATURE	topological domain:Cytoplasmic	5	71.4286	0.0043522	P39453, P0AEC3, P30855, P30844, P39838	7	575	4147	5.15155	0.0875261	0.0161679	0.0117585
UP_SEQ_FEATURE	topological domain:Periplasmic	5	71.4286	0.00440943	P39453, P0AEC3, P30855, P30844, P39838	7	577	4147	5.1337	0.0886267	0.0161679	0.0117585
GOTERM_MF_DIRECT	GO:0016772~transferase activity, transferring phosphorus-containing groups	2	28.5714	0.00938667	P39453, P30844	7	5	3186	182.057	0.0899994	0.0234667	0.0234667
SMART	SM00260:CheW	2	28.5714	0.0151036	P0A964, P07363	7	2	792	113.143	0.128003	0.0339832	0.0339832
UP_SEQ_FEATURE	transmembrane region	5	71.4286	0.0204931	P39453, P0AEC3, P30855, P30844, P39838	7	875	4147	3.38531	0.352622	0.0644068	0.0468413
GOTERM_CC_DIRECT	GO:0005886~plasma membrane	6	85.7143	0.0213931	P39453, P0AEC3, P30855, P30844, P07363, P39838	7	1021	2941	2.46901	0.121686	0.0641794	0.0641794
UP_KEYWORDS	Cell inner membrane	5	71.4286	0.0221158	P39453, P0AEC3, P30855, P30844, P39838	7	892	4139	3.31438	0.316268	0.0469961	0.0387027
UP_KEYWORDS	Transmembrane helix	5	71.4286	0.0221158	P39453, P0AEC3, P30855, P30844, P39838	7	892	4139	3.31438	0.316268	0.0469961	0.0387027
UP_KEYWORDS	Transmembrane	5	71.4286	0.0262789	P39453, P0AEC3, P30855, P30844, P39838	7	936	4139	3.15858	0.364101	0.0496378	0.0408782
UP_SEQ_FEATURE	domain:HAMP	2	28.5714	0.027193	P39453, P30844	7	19	4147	62.3609	0.43952	0.0747808	0.054386
SMART	SM00448:REC	3	42.8571	0.0283036	P39453, P0AEC3, P30855	7	37	792	9.17375	0.227719	0.0509464	0.0509464
UP_KEYWORDS	Chemotaxis	2	28.5714	0.0314897	P0A964, P07363	7	22	4139	53.7532	0.419541	0.0535326	0.0440856
INTERPRO	IPR003660:HAMP linker domain	2	28.5714	0.0329271	P39453, P30844	7	22	3956	51.3766	0.452649	0.0658542	0.0658542
GOTERM_BP_DIRECT	GO:0006935~chemotaxis	2	28.5714	0.0396405	P0A964, P07363	7	22	3277	42.5584	0.536293	0.118921	0.118921
UP_KEYWORDS	Cell membrane	5	71.4286	0.0397239	P39453, P0AEC3, P30855, P30844, P39838	7	1052	4139	2.81029	0.497965	0.0613915	0.0505577
UP_KEYWORDS	Membrane	5	71.4286	0.0581019	P39453, P0AEC3, P30855, P30844, P39838	7	1174	4139	2.51825	0.638534	0.082311	0.0677855
KEGG_PATHWAY	eco02030:Bacterial chemotaxis	2	28.5714	0.0744301	P0A964, P07363	7	20	1564	22.3429	0.207083	0.111645	0.111645
UP_SEQ_FEATURE	mutagenesis site	3	42.8571	0.092705	P39453, P0AEC3, P39838	7	368	4147	4.82958	0.870366	0.226612	0.164809
Spectral Depth 1000; LPS biosynthesis Module
Category	Term	Count	%	PValue	Genes	List Total	Pop Hits	Pop Total	Fold Enrichment	Bonferroni	Benjamini	FDR
INTERPRO	IPR013645:Glycosyl transferase, family 8, C-terminal	2	100	0.000505561	P27128, P27129	2	2	3956	1978	0.00101087	0.000505561	0.000505561
INTERPRO	IPR002495:Glycosyl transferase, family 8	2	100	0.000505561	P27128, P27129	2	2	3956	1978	0.00101087	0.000505561	0.000505561
GOTERM_MF_DIRECT	GO:0008918~lipopolysaccharide 3-alpha-galactosyltransferase activity	2	100	0.000627746	P27128, P27129	2	2	3186	1593	0.00188206	0.00188324	0.00188324
GOTERM_BP_DIRECT	GO:0009244~lipopolysaccharide core region biosynthetic process	2	100	0.00732377	P27128, P27129	2	24	3277	136.542	0.00732377	0.00732377	0.00732377
UP_KEYWORDS	Glycosyltransferase	2	100	0.0132882	P27128, P27129	2	55	4139	75.2545	0.0393373	0.0239188	0.0159459
UP_KEYWORDS	Lipopolysaccharide biosynthesis	2	100	0.0159459	P27128, P27129	2	66	4139	62.7121	0.0470789	0.0239188	0.0159459
KEGG_PATHWAY	eco00540:Lipopolysaccharide biosynthesis	2	100	0.019821	P27128, P27129	2	31	1564	50.4516	0.0392491	0.0396419	0.0396419
COG_ONTOLOGY	Cell envelope biogenesis, outer membrane	2	100	0.0634921	P27128, P27129	2	40	630	15.75	0.122953	0.0634921	0.0634921
Spectral Depth 1000; c-di-GMP catabolism Module
Category	Term	Count	%	PValue	Genes	List Total	Pop Hits	Pop Total	Fold Enrichment	Bonferroni	Benjamini	FDR
INTERPRO	IPR001633:Diguanylate phosphodiesterase, EAL domain	11	100	7.6036e-26	P75990, P76204, P76446, P75995, P13518, P37646, P77172, P75800, P23842, P76261, P37649	11	17	3956	232.706	5.32252e-25	5.32252e-25	5.32252e-25
UP_SEQ_FEATURE	domain:EAL	10	90.9091	1.1544e-23	P75990, P76204, P76446, P75995, P13518, P37646, P77172, P75800, P23842, P76261	10	16	4147	259.188	1.7316e-22	1.84704e-22	1.84704e-22
SMART	SM00052:DUF2	10	90.9091	3.54384e-17	P75990, P76446, P75995, P13518, P37646, P77172, P75800, P23842, P76261, P37649	10	16	792	49.5	1.06315e-16	1.06315e-16	1.06315e-16
GOTERM_MF_DIRECT	GO:0071111~cyclic-guanylate-specific phosphodiesterase activity	4	36.3636	3.10662e-07	P37646, P77172, P75800, P76261	7	9	3186	202.286	2.79596e-06	2.79596e-06	2.79596e-06
UP_KEYWORDS	c-di-GMP	4	36.3636	2.86951e-06	P37646, P77172, P75800, P76261	11	13	4139	115.776	5.45193e-05	5.45207e-05	5.45207e-05
INTERPRO	IPR000160:GGDEF domain	4	36.3636	1.10401e-05	P13518, P77172, P23842, P37649	11	19	3956	75.7129	7.72784e-05	3.86405e-05	3.86405e-05
INTERPRO	IPR024744:Putative cyclic diguanylate phosphodiesterase, CSS motif-containing domain	3	27.2727	5.72903e-05	P76446, P75995, P76261	11	5	3956	215.782	0.000400963	0.000133677	0.000133677
SMART	SM00267:DUF1	4	36.3636	0.000900104	P13518, P77172, P23842, P37649	10	19	792	16.6737	0.00269788	0.00135016	0.00135016
GOTERM_CC_DIRECT	GO:0005886~plasma membrane	6	54.5455	0.00501039	P76446, P75995, P13518, P77172, P23842, P37649	6	1021	2941	2.88051	0.014956	0.0150312	0.0150312
INTERPRO	IPR007895:MASE1	2	18.1818	0.0100768	P77172, P23842	11	4	3956	179.818	0.0684404	0.0176343	0.0176343
GOTERM_BP_DIRECT	GO:0043433~negative regulation of sequence-specific DNA binding transcription factor activity	2	18.1818	0.0109438	P75990, P76204	7	6	3277	156.048	0.152159	0.153213	0.153213
UP_SEQ_FEATURE	domain:GGDEF	2	18.1818	0.0363294	P13518, P23842	10	17	4147	48.7882	0.425977	0.290635	0.290635
GOTERM_MF_DIRECT	GO:0000166~nucleotide binding	2	18.1818	0.0552261	P37646, P77172	7	30	3186	30.3429	0.400277	0.248518	0.248518
GOTERM_CC_DIRECT	GO:0016021~integral component of membrane	4	36.3636	0.0868	P76446, P13518, P77172, P37649	6	687	2941	2.85395	0.238451	0.1302	0.1302
UP_KEYWORDS	Hydrolase	4	36.3636	0.0995661	P37646, P77172, P75800, P76261	11	479	4139	3.14215	0.863672	0.945878	0.945878
Spectral Depth 1000; c-di-GMP synthesis Module
Category	Term	Count	%	PValue	Genes	List Total	Pop Hits	Pop Total	Fold Enrichment	Bonferroni	Benjamini	FDR
GOTERM_MF_DIRECT	GO:0052621~diguanylate cyclase activity	6	100	9.24095e-14	P75908, P77302, P31129, P76330, P0AAP1, P0AA89	6	10	3186	318.6	8.31335e-13	8.31686e-13	8.31686e-13
UP_SEQ_FEATURE	domain:GGDEF	6	100	6.06889e-13	P75908, P77302, P31129, P76330, P0AAP1, P0AA89	6	17	4147	243.941	7.28217e-12	7.88955e-12	7.88955e-12
INTERPRO	IPR000160:GGDEF domain	6	100	1.44379e-12	P75908, P77302, P31129, P76330, P0AAP1, P0AA89	6	19	3956	208.211	1.01061e-11	1.01065e-11	1.01065e-11
UP_KEYWORDS	GTP-binding	6	100	1.69564e-10	P75908, P77302, P31129, P76330, P0AAP1, P0AA89	6	48	4139	86.2292	2.54347e-09	2.54347e-09	2.54347e-09
GOTERM_MF_DIRECT	GO:0005525~GTP binding	6	100	1.05233e-09	P75908, P77302, P31129, P76330, P0AAP1, P0AA89	6	53	3186	60.1132	9.47094e-09	4.73547e-09	4.73547e-09
SMART	SM00267:DUF1	6	100	4.53476e-09	P75908, P77302, P31129, P76330, P0AAP1, P0AA89	6	19	792	41.6842	9.06952e-09	9.06952e-09	9.06952e-09
UP_KEYWORDS	Magnesium	6	100	7.74097e-07	P75908, P77302, P31129, P76330, P0AAP1, P0AA89	6	250	4139	16.556	1.16114e-05	5.80573e-06	5.80573e-06
UP_KEYWORDS	Nucleotide-binding	6	100	2.19175e-05	P75908, P77302, P31129, P76330, P0AAP1, P0AA89	6	486	4139	8.51646	0.000328711	0.000109587	0.000109587
UP_KEYWORDS	Transferase	6	100	4.70935e-05	P75908, P77302, P31129, P76330, P0AAP1, P0AA89	6	566	4139	7.31272	0.00070617	0.000176601	0.000176601
UP_KEYWORDS	Metal-binding	6	100	7.99659e-05	P75908, P77302, P31129, P76330, P0AAP1, P0AA89	6	629	4139	6.58029	0.00119882	0.000239898	0.000239898
GOTERM_MF_DIRECT	GO:0046872~metal ion binding	5	83.3333	0.00035726	P75908, P77302, P76330, P0AAP1, P0AA89	6	300	3186	8.85	0.00321075	0.00107178	0.00107178
GOTERM_BP_DIRECT	GO:0051271~negative regulation of cellular component movement	2	33.3333	0.00244014	P75908, P31129	5	2	3277	655.4	0.0265164	0.0244014	0.0244014
Spectral Depth 1000; Flagellar filament Module
Category	Term	Count	%	PValue	Genes	List Total	Pop Hits	Pop Total	Fold Enrichment	Bonferroni	Benjamini	FDR
INTERPRO	IPR001029:Flagellin, D0/D1 domain	2	100	0.000505561	P04949, P29744	2	2	3956	1978	0.00202071	0.00202224	0.00202224
UP_KEYWORDS	Secreted	2	100	0.00241604	P04949, P29744	2	10	4139	413.9	0.00482625	0.00483209	0.00483209
GOTERM_MF_DIRECT	GO:0005198~structural molecule activity	2	100	0.0047081	P04949, P29744	2	15	3186	212.4	0.0047081	0.0047081	0.0047081
UP_KEYWORDS	Bacterial flagellum	2	100	0.00483209	P04949, P29744	2	20	4139	206.95	0.00964082	0.00483209	0.00483209
GOTERM_CC_DIRECT	GO:0005576~extracellular region	2	100	0.00612037	P04949, P29744	2	18	2941	163.389	0.0242576	0.0244815	0.0244815
GOTERM_BP_DIRECT	GO:0071973~bacterial-type flagellum-dependent cell motility	2	100	0.00915471	P04949, P29744	2	30	3277	109.233	0.0361191	0.0274641	0.0274641
KEGG_PATHWAY	eco02040:Flagellar assembly	2	100	0.0230179	P04949, P29744	2	36	1564	43.4444	0.045506	0.0460358	0.0460358
Spectral Depth 1000; Flagellar rod Module
Category	Term	Count	%	PValue	Genes	List Total	Pop Hits	Pop Total	Fold Enrichment	Bonferroni	Benjamini	FDR
GOTERM_BP_DIRECT	GO:0071973~bacterial-type flagellum-dependent cell motility	2	100	0.00915471	P75938, P75942	2	30	3277	109.233	0.0536864	0.0457736	0.0457736
Spectral Depth 1000; Flagellar L- and P-rings Module
Category	Term	Count	%	PValue	Genes	List Total	Pop Hits	Pop Total	Fold Enrichment	Bonferroni	Benjamini	FDR
UP_KEYWORDS	Bacterial flagellum	2	100	0.00483209	P0A6S3, P0A6S0	2	20	4139	206.95	0.0333382	0.0338246	0.0338246
GOTERM_BP_DIRECT	GO:0071973~bacterial-type flagellum-dependent cell motility	2	100	0.00915471	P0A6S3, P0A6S0	2	30	3277	109.233	0.0361191	0.0274641	0.0274641
KEGG_PATHWAY	eco02040:Flagellar assembly	2	100	0.0230179	P0A6S3, P0A6S0	2	36	1564	43.4444	0.0230179	0.0230179	0.0230179
Spectral Depth 1000; Flagellar Rotation Module
Category	Term	Count	%	PValue	Genes	List Total	Pop Hits	Pop Total	Fold Enrichment	Bonferroni	Benjamini	FDR
UP_KEYWORDS	Flagellar rotation	2	100	0.00217444	P09348, P0AF06	2	9	4139	459.889	0.0236605	0.0239188	0.0239188
UP_KEYWORDS	Chemotaxis	2	100	0.00531529	P09348, P0AF06	2	22	4139	188.136	0.0569389	0.0292341	0.0292341
GOTERM_BP_DIRECT	GO:0006935~chemotaxis	2	100	0.00671346	P09348, P0AF06	2	22	3277	148.955	0.0396107	0.0335673	0.0335673
KEGG_PATHWAY	eco02030:Bacterial chemotaxis	2	100	0.0127877	P09348, P0AF06	2	20	1564	78.2	0.0378747	0.0345269	0.0345269
KEGG_PATHWAY	eco02040:Flagellar assembly	2	100	0.0230179	P09348, P0AF06	2	36	1564	43.4444	0.0674764	0.0345269	0.0345269
Spectral Depth 1000; Flagellar basal body Module
Category	Term	Count	%	PValue	Genes	List Total	Pop Hits	Pop Total	Fold Enrichment	Bonferroni	Benjamini	FDR
KEGG_PATHWAY	eco02040:Flagellar assembly	14	100	4.51523e-23	P06974, P0AC05, P0ABW9, P76298, P76299, P75933, P33135, P52612, P75936, P0AC07, P0ABX2, P0A8T5, P0ABZ1, P25798	14	36	1564	43.4444	9.03046e-23	9.03046e-23	9.03046e-23
UP_KEYWORDS	Bacterial flagellum	8	57.1429	3.18858e-14	P06974, P0ABW9, P33135, P0ABX2, P0A8T5, P0ABZ1, P25798, P0AC07	14	20	4139	118.257	6.69131e-13	6.69601e-13	5.42058e-13
GOTERM_CC_DIRECT	GO:0009425~bacterial-type flagellum basal body	6	42.8571	5.48999e-10	P0AC05, P06974, P33135, P0A8T5, P0ABZ1, P0AC07	14	12	2941	105.036	6.03899e-09	6.03899e-09	5.48999e-09
UP_KEYWORDS	Bacterial flagellum biogenesis	6	42.8571	7.73507e-10	P0AC05, P76298, P76299, P75933, P52612, P75936	14	17	4139	104.345	1.62436e-08	8.12182e-09	6.57481e-09
GOTERM_BP_DIRECT	GO:0044780~bacterial-type flagellum assembly	6	42.8571	1.20613e-09	P76298, P76299, P33135, P52612, P0ABZ1, P0AC07	14	15	3277	93.6286	1.44735e-08	1.32674e-08	1.32674e-08
GOTERM_MF_DIRECT	GO:0003774~motor activity	4	28.5714	4.15489e-08	P06974, P0A8T5, P0ABZ1, P25798	5	8	3186	318.6	2.49293e-07	2.49293e-07	2.49293e-07
GOTERM_BP_DIRECT	GO:0071973~bacterial-type flagellum-dependent cell motility	6	42.8571	5.55058e-08	P06974, P75933, P52612, P0A8T5, P0ABZ1, P25798	14	30	3277	46.8143	6.66069e-07	3.05282e-07	3.05282e-07
UP_KEYWORDS	Bacterial flagellum protein export	4	28.5714	4.81738e-07	P0AC05, P76298, P76299, P52612	14	6	4139	197.095	1.01165e-05	3.37217e-06	2.72985e-06
GOTERM_BP_DIRECT	GO:0009306~protein secretion	4	28.5714	1.73231e-05	P0AC05, P76298, P76299, P0AC07	14	14	3277	66.8776	0.000207858	6.35181e-05	6.35181e-05
GOTERM_BP_DIRECT	GO:0044781~bacterial-type flagellum organization	3	21.4286	0.000642288	P0AC05, P75933, P75936	14	10	3277	70.2214	0.00768029	0.00176629	0.00176629
GOTERM_CC_DIRECT	GO:0009424~bacterial-type flagellum hook	3	21.4286	0.000795823	P0ABW9, P0ABX2, P75936	14	10	2941	63.0214	0.0087193	0.00437703	0.00397912
GOTERM_BP_DIRECT	GO:0071978~bacterial-type flagellum-dependent swarming motility	3	21.4286	0.00110584	P0ABW9, P0ABX2, P75936	14	13	3277	54.0165	0.0131897	0.00243285	0.00243285
UP_KEYWORDS	Protein transport	4	28.5714	0.00112534	P0AC05, P76298, P76299, P52612	14	69	4139	17.1387	0.0233681	0.00590805	0.0047827
GOTERM_CC_DIRECT	GO:0030694~bacterial-type flagellum basal body, rod	2	14.2857	0.00882249	P0ABW9, P0ABX2	14	2	2941	210.071	0.0928777	0.0323491	0.0294083
UP_KEYWORDS	Cell inner membrane	8	57.1429	0.0106039	P0AC05, P06974, P76298, P76299, P33135, P0ABZ1, P25798, P0AC07	14	892	4139	2.65151	0.200581	0.0445362	0.0360531
INTERPRO	IPR019776:Flagellar basal body rod protein, conserved site	2	14.2857	0.0163313	P0ABW9, P0ABX2	14	5	3956	113.029	0.438034	0.342438	0.342438
INTERPRO	IPR001444:Flagellar basal body rod protein, N-terminal	2	14.2857	0.0195679	P0ABW9, P0ABX2	14	6	3956	94.1905	0.499259	0.342438	0.342438
UP_KEYWORDS	Cell membrane	8	57.1429	0.0263403	P0AC05, P06974, P76298, P76299, P33135, P0ABZ1, P25798, P0AC07	14	1052	4139	2.24823	0.429112	0.0838255	0.0678587
UP_KEYWORDS	Flagellar rotation	2	14.2857	0.0279418	P06974, P0ABZ1	14	9	4139	65.6984	0.44851	0.0838255	0.0678587
UP_KEYWORDS	Membrane	8	57.1429	0.0467928	P0AC05, P06974, P76298, P76299, P33135, P0ABZ1, P25798, P0AC07	14	1174	4139	2.0146	0.634461	0.122831	0.0994347
UP_SEQ_FEATURE	signal peptide	5	35.7143	0.0645299	P0AC05, P75933, P75936, P25798, P0AC07	14	508	4147	2.91549	0.699019	1	1
UP_KEYWORDS	Chemotaxis	2	14.2857	0.0670317	P06974, P0ABZ1	14	22	4139	26.8766	0.767081	0.156407	0.126615
