# Supplementary material for: Defining hierarchical protein interaction networks from spectral analysis of bacterial proteomes
Source: eLife. 2022 Aug 17;11:e74104. doi: 10.7554/eLife.74104 (PMC9427106; doi:10.7554/eLife.74104)
Supplement: Supplementary file 2. [file elife-74104-supp2.xlsx]

## Sheet: Overview
Supplementary File 2: Data related to Figure 6--Figure Supplement 2
Tab	Contents
Spectral Depth Table	Hierarchically clustered spectral depth matrix for E. coli K12 proteins coevolving with MotB
Metadata	Protein accession, module designations, BRITE categories, literature references, and other associated metadata
Module_designations	Accessions of proteins assigned to each module in the statistical hierarchy
SDX	Adjacency matrix generated by thresholding the hierarchically clustered spectral depth matrix to spectral depth 'X'
David_Output_SDX	Output table for gene set enrichment analysis of the sets of proteins within each statistical module observed at a spectral depth of 'X' using David v6.8

## Sheet: Spectral Depth Table
UniProtID	Node Label	AroH	AroG	AroF	CheZ	FliD	FlgN	YcgR	SstT	PpdD	CpoB	IraD	YhhZ	YafU	Tsr	Tap	Aer	Tar	Trg	CheB	CheR	CheW	CheA	DosC	DgcQ	DgcM	DgcC	DgcZ	DgcT	FliC	FlgL	FliL	FliK	FliS	FlgK	FlgE	FlgG	FlgH	FlgI	FlgA	FlgF	FlgJ	FliM	FlgD	FliG	FliE	FlgB	FlgC	FliP
P00887	AroH	3000	3000	3000	51	51	51	51	57	51	51	51	51	51	51	51	51	51	51	51	51	51	51	51	51	51	51	51	51	51	51	51	51	51	51	51	51	51	51	51	51	51	51	51	51	51	51	51	51
P0AB91	AroG	3000	3000	3000	51	51	51	51	57	51	51	51	51	51	51	51	51	51	51	51	51	51	51	51	51	51	51	51	51	51	51	51	51	51	51	51	51	51	51	51	51	51	51	51	51	51	51	51	51
P00888	AroF	3000	3000	3000	51	51	51	51	57	51	51	51	51	51	51	51	51	51	51	51	51	51	51	51	51	51	51	51	51	51	51	51	51	51	51	51	51	51	51	51	51	51	51	51	51	51	51	51	51
P0A9H9	CheZ	51	51	51	3000	51	51	51	51	51	51	51	51	51	140	140	140	140	140	60	54	54	53	90	90	90	90	90	90	103	103	156	91	51	77	76	60	155	155	103	54	88	102	103	100	102	89	103	100
P24216	FliD	51	51	51	51	3000	51	63	51	51	51	51	51	51	67	67	67	67	67	51	51	85	85	51	51	51	51	51	51	117	117	64	103	143	86	102	110	52	103	51	51	64	116	115	115	115	115	115	115
P43533	FlgN	51	51	51	51	51	3000	102	51	51	51	51	53	51	51	51	51	51	51	51	51	51	51	51	51	51	51	51	51	51	51	54	138	62	53	51	54	51	51	51	112	54	85	61	57	85	85	61	62
P76010	YcgR	51	51	51	51	63	102	3000	51	51	51	51	51	51	85	85	85	85	85	85	85	85	85	86	86	86	86	86	86	85	85	85	102	100	85	71	85	79	51	51	88	86	96	86	97	86	86	85	86
P0AGE4	SstT	57	57	57	51	51	51	51	3000	51	51	51	51	51	51	51	51	51	51	51	51	51	51	51	51	51	51	51	51	51	51	51	51	51	51	51	51	51	51	51	51	51	51	51	51	51	51	51	51
P36647	PpdD	51	51	51	51	51	51	51	51	3000	51	51	51	51	51	51	51	51	51	51	51	51	51	51	51	51	51	51	51	51	51	51	51	51	51	51	51	51	51	51	51	51	51	51	51	51	51	51	51
P45955	CpoB	51	51	51	51	51	51	51	51	51	3000	51	51	51	51	51	51	51	51	51	60	51	51	51	51	51	51	51	51	51	51	51	51	51	51	51	51	51	51	51	51	51	51	51	51	51	51	51	51
P39375	IraD	51	51	51	51	51	51	51	51	51	51	3000	553	270	51	51	51	51	51	51	51	51	51	51	51	51	51	51	51	51	51	51	51	51	51	51	51	51	51	51	51	51	51	51	51	51	51	51	51
P46855	YhhZ	51	51	51	51	51	53	51	51	51	51	553	3000	486	51	51	51	51	51	51	51	51	51	51	51	51	51	51	51	51	51	51	51	51	51	51	51	51	51	51	51	51	51	51	51	51	51	51	51
P77354	YafU	51	51	51	51	51	51	51	51	51	51	270	486	3000	51	51	51	51	51	51	51	51	51	51	51	51	51	51	51	51	51	51	51	51	51	51	51	51	51	51	51	51	51	51	51	51	51	51	51
P02942	Tsr	51	51	51	140	67	51	85	51	51	51	51	51	51	3000	3000	3000	3000	3000	275	227	408	271	225	225	225	225	225	225	122	122	122	86	100	99	103	89	89	96	85	57	87	97	100	100	94	91	95	92
P07018	Tap	51	51	51	140	67	51	85	51	51	51	51	51	51	3000	3000	3000	3000	3000	275	227	408	271	225	225	225	225	225	225	122	122	122	86	100	99	103	89	89	96	85	57	87	97	100	100	94	91	95	92
P50466	Aer	51	51	51	140	67	51	85	51	51	51	51	51	51	3000	3000	3000	3000	3000	275	227	408	271	225	225	225	225	225	225	122	122	122	86	100	99	103	89	89	96	85	57	87	97	100	100	94	91	95	92
P07017	Tar	51	51	51	140	67	51	85	51	51	51	51	51	51	3000	3000	3000	3000	3000	275	227	408	271	225	225	225	225	225	225	122	122	122	86	100	99	103	89	89	96	85	57	87	97	100	100	94	91	95	92
P05704	Trg	51	51	51	140	67	51	85	51	51	51	51	51	51	3000	3000	3000	3000	3000	275	227	408	271	225	225	225	225	225	225	122	122	122	86	100	99	103	89	89	96	85	57	87	97	100	100	94	91	95	92
P07330	CheB	51	51	51	60	51	51	85	51	51	51	51	51	51	275	275	275	275	275	3000	3000	1324	516	130	130	130	130	130	130	89	89	112	85	83	85	81	85	79	65	51	51	51	86	85	86	85	83	85	85
P07364	CheR	51	51	51	54	51	51	85	51	51	60	51	51	51	227	227	227	227	227	3000	3000	1720	805	156	156	156	156	156	156	101	101	113	85	62	85	81	72	80	79	53	51	65	89	86	89	85	85	85	85
P0A964	CheW	51	51	51	54	85	51	85	51	51	51	51	51	51	408	408	408	408	408	1324	1720	3000	516	157	157	157	157	157	157	129	129	136	102	112	100	104	97	109	114	105	113	103	112	109	103	103	102	102	103
P07363	CheA	51	51	51	53	85	51	85	51	51	51	51	51	51	271	271	271	271	271	516	805	516	3000	174	174	174	174	174	174	130	130	103	93	103	95	90	89	99	94	54	51	82	97	97	100	93	93	93	93
P0AA89	DosC	51	51	51	90	51	51	86	51	51	51	51	51	51	225	225	225	225	225	130	156	157	174	3000	3000	3000	3000	3000	3000	93	93	89	74	85	85	85	60	89	79	52	51	76	85	85	85	83	79	83	79
P76330	DgcQ	51	51	51	90	51	51	86	51	51	51	51	51	51	225	225	225	225	225	130	156	157	174	3000	3000	3000	3000	3000	3000	93	93	89	74	85	85	85	60	89	79	52	51	76	85	85	85	83	79	83	79
P77302	DgcM	51	51	51	90	51	51	86	51	51	51	51	51	51	225	225	225	225	225	130	156	157	174	3000	3000	3000	3000	3000	3000	93	93	89	74	85	85	85	60	89	79	52	51	76	85	85	85	83	79	83	79
P0AAP1	DgcC	51	51	51	90	51	51	86	51	51	51	51	51	51	225	225	225	225	225	130	156	157	174	3000	3000	3000	3000	3000	3000	93	93	89	74	85	85	85	60	89	79	52	51	76	85	85	85	83	79	83	79
P31129	DgcZ	51	51	51	90	51	51	86	51	51	51	51	51	51	225	225	225	225	225	130	156	157	174	3000	3000	3000	3000	3000	3000	93	93	89	74	85	85	85	60	89	79	52	51	76	85	85	85	83	79	83	79
P75908	DgcT	51	51	51	90	51	51	86	51	51	51	51	51	51	225	225	225	225	225	130	156	157	174	3000	3000	3000	3000	3000	3000	93	93	89	74	85	85	85	60	89	79	52	51	76	85	85	85	83	79	83	79
P04949	FliC	51	51	51	103	117	51	85	51	51	51	51	51	51	122	122	122	122	122	89	101	129	130	93	93	93	93	93	93	3000	3000	272	238	373	309	247	317	276	309	223	307	243	309	314	317	317	319	318	312
P29744	FlgL	51	51	51	103	117	51	85	51	51	51	51	51	51	122	122	122	122	122	89	101	129	130	93	93	93	93	93	93	3000	3000	272	238	373	309	247	317	276	309	223	307	243	309	314	317	317	319	318	312
P0ABX8	FliL	51	51	51	156	64	54	85	51	51	51	51	51	51	122	122	122	122	122	112	113	136	103	89	89	89	89	89	89	272	272	3000	303	267	256	250	256	309	309	299	297	284	328	314	381	452	467	447	437
P52614	FliK	51	51	51	91	103	138	102	51	51	51	51	51	51	86	86	86	86	86	85	85	102	93	74	74	74	74	74	74	238	238	303	3000	256	309	206	223	302	309	275	331	302	331	331	309	331	333	331	323
P26608	FliS	51	51	51	51	143	62	100	51	51	51	51	51	51	100	100	100	100	100	83	62	112	103	85	85	85	85	85	85	373	373	267	256	3000	331	214	269	263	276	203	681	203	352	331	336	335	344	331	331
P33235	FlgK	51	51	51	77	86	53	85	51	51	51	51	51	51	99	99	99	99	99	85	85	100	95	85	85	85	85	85	85	309	309	256	309	331	3000	265	316	309	327	254	331	206	337	342	287	338	332	331	332
P75937	FlgE	51	51	51	76	102	51	71	51	51	51	51	51	51	103	103	103	103	103	81	81	104	90	85	85	85	85	85	85	247	247	250	206	214	265	3000	233	298	308	255	215	215	284	335	256	276	305	276	305
P0ABX5	FlgG	51	51	51	60	110	54	85	51	51	51	51	51	51	89	89	89	89	89	85	72	97	89	60	60	60	60	60	60	317	317	256	223	269	316	233	3000	331	326	253	51	172	434	406	310	677	498	540	633
P0A6S0	FlgH	51	51	51	155	52	51	79	51	51	51	51	51	51	89	89	89	89	89	79	80	109	99	89	89	89	89	89	89	276	276	309	302	263	309	298	331	3000	2543	674	627	468	412	413	330	557	637	556	548
P0A6S3	FlgI	51	51	51	155	103	51	51	51	51	51	51	51	51	96	96	96	96	96	65	79	114	94	79	79	79	79	79	79	309	309	309	309	276	327	308	326	2543	3000	670	766	508	389	460	332	631	637	578	584
P75933	FlgA	51	51	51	103	51	51	51	51	51	51	51	51	51	85	85	85	85	85	51	53	105	54	52	52	52	52	52	52	223	223	299	275	203	254	255	253	674	670	3000	316	253	269	281	215	330	322	331	331
P75938	FlgF	51	51	51	54	51	112	88	51	51	51	51	51	51	57	57	57	57	57	51	51	113	51	51	51	51	51	51	51	307	307	297	331	681	331	215	51	627	766	316	3000	1080	389	337	341	380	376	370	361
P75942	FlgJ	51	51	51	88	64	54	86	51	51	51	51	51	51	87	87	87	87	87	51	65	103	82	76	76	76	76	76	76	243	243	284	302	203	206	215	172	468	508	253	1080	3000	256	287	256	355	287	256	256
P06974	FliM	51	51	51	102	116	85	96	51	51	51	51	51	51	97	97	97	97	97	86	89	112	97	85	85	85	85	85	85	309	309	328	331	352	337	284	434	412	389	269	389	256	3000	715	817	607	749	758	553
P75936	FlgD	51	51	51	103	115	61	86	51	51	51	51	51	51	100	100	100	100	100	85	86	109	97	85	85	85	85	85	85	314	314	314	331	331	342	335	406	413	460	281	337	287	715	3000	548	674	948	1078	748
P0ABZ1	FliG	51	51	51	100	115	57	97	51	51	51	51	51	51	100	100	100	100	100	86	89	103	100	85	85	85	85	85	85	317	317	381	309	336	287	256	310	330	332	215	341	256	817	548	3000	551	545	548	548
P0A8T5	FliE	51	51	51	102	115	85	86	51	51	51	51	51	51	94	94	94	94	94	85	85	103	93	83	83	83	83	83	83	317	317	452	331	335	338	276	677	557	631	330	380	355	607	674	551	3000	1335	1727	1168
P0ABW9	FlgB	51	51	51	89	115	85	86	51	51	51	51	51	51	91	91	91	91	91	83	85	102	93	79	79	79	79	79	79	319	319	467	333	344	332	305	498	637	637	322	376	287	749	948	545	1335	3000	1597	1217
P0ABX2	FlgC	51	51	51	103	115	61	85	51	51	51	51	51	51	95	95	95	95	95	85	85	102	93	83	83	83	83	83	83	318	318	447	331	331	331	276	540	556	578	331	370	256	758	1078	548	1727	1597	3000	1186
P0AC05	FliP	51	51	51	100	115	62	86	51	51	51	51	51	51	92	92	92	92	92	85	85	103	93	79	79	79	79	79	79	312	312	437	323	331	332	305	633	548	584	331	361	256	553	748	548	1168	1217	1186	3000
P33135	FliR	51	51	51	100	115	62	86	51	51	51	51	51	51	91	91	91	91	91	83	85	102	93	79	79	79	79	79	79	312	312	438	331	332	338	286	438	541	635	335	380	257	545	735	548	1116	1161	1200	3000
P0AC07	FliQ	51	51	51	103	115	85	86	51	51	51	51	51	51	94	94	94	94	94	85	85	108	94	83	83	83	83	83	83	308	308	465	323	308	331	278	435	490	506	340	376	289	1056	723	548	1587	1151	1179	2893
P25798	FliF	51	51	51	86	119	60	86	51	51	51	51	51	51	94	94	94	94	94	83	85	103	103	83	83	83	83	83	83	329	329	315	331	331	332	318	396	548	682	330	380	359	492	548	561	634	634	631	678
P76298	FlhA	51	51	51	89	110	60	86	51	51	51	51	51	51	92	92	92	92	92	83	79	100	97	79	79	79	79	79	79	312	312	340	322	331	332	318	434	541	548	327	368	327	507	548	634	602	551	576	648
Q47153	LfhA	51	51	51	89	110	60	86	51	51	51	51	51	51	92	92	92	92	92	83	79	100	97	79	79	79	79	79	79	312	312	340	322	331	332	318	434	541	548	327	368	327	507	548	634	602	551	576	648
P15070	FliN	51	51	51	99	85	54	72	51	51	51	72	80	51	86	86	86	86	86	60	61	94	89	59	59	59	59	59	59	180	180	180	194	167	199	242	197	194	393	180	180	136	486	411	199	678	581	483	608
P52612	FliI	51	51	51	89	86	62	85	51	51	51	85	80	52	86	86	86	86	86	72	79	96	93	57	57	57	57	57	57	194	194	180	180	170	252	147	202	199	386	180	195	151	491	407	195	570	549	574	573
P76299	FlhB	51	51	51	100	76	62	85	51	51	51	51	52	51	89	89	89	89	89	85	85	99	93	60	60	60	60	60	60	307	307	211	204	308	303	252	369	389	386	199	364	176	493	541	444	541	541	413	693
P09348	MotA	51	51	51	155	86	104	96	51	51	51	51	51	51	112	112	112	112	112	85	89	114	97	94	94	94	94	94	94	307	307	290	211	213	277	240	281	290	330	251	328	249	331	331	345	331	429	332	331
P0AF06	MotB	51	51	51	142	69	85	85	51	51	68	87	92	81	99	99	99	99	99	85	85	111	85	85	85	85	85	85	85	180	180	208	183	164	130	191	206	203	255	203	206	209	200	206	195	243	245	206	243
Q47154	LafU	51	51	51	142	69	85	85	51	51	68	87	92	81	99	99	99	99	99	85	85	111	85	85	85	85	85	85	85	180	180	208	183	164	130	191	206	203	255	203	206	209	200	206	195	243	245	206	243
P0AEM4	FlgM	51	51	51	51	88	155	155	51	51	51	51	51	51	72	72	72	72	72	63	51	112	51	51	51	51	51	51	51	146	146	172	170	200	108	103	151	152	141	150	548	172	151	151	131	167	151	150	151
P22586	FliO	51	51	51	57	71	84	104	51	51	51	51	51	51	99	99	99	99	99	106	96	103	101	60	60	60	60	60	60	170	170	203	179	351	132	121	163	128	128	121	170	115	299	180	291	174	179	180	179
P52613	FliJ	51	51	51	51	110	144	104	51	51	51	51	51	51	86	86	86	86	86	86	62	112	58	54	54	54	54	54	54	194	194	194	302	289	152	115	186	154	147	129	202	188	180	194	194	194	183	182	180
P31068	FliH	51	51	51	51	51	60	72	51	51	125	78	75	80	85	85	85	85	85	64	85	96	85	51	51	51	51	51	51	170	170	174	224	183	168	147	233	191	198	169	182	164	201	233	172	317	255	254	334
[truncated: 15 more columns]

## Sheet: Metadata
Uniprot ID	Node Label	Locus Tag	In BRITE	Evidence	Reference	Module (SD50)	Module (SD300)	Module (SD1000)	Gene names	Protein names	Annotation	Gene ontology (biological process)	Cross-reference (KEGG)	Cross-reference (Pfam)	EnsemblBacteria transcript	Cross-reference (BioCyc)
P50466	Aer	b3072	MCPs	In BRITE		Directed motility	Chemotaxis signaling	Chemoreception	aer air yqjJ b3072 JW3043	Aerotaxis receptor	4 out of 5	chemotaxis [GO:0006935]; positive aerotaxis [GO:0052131]; signal transduction [GO:0007165]	ecj:JW3043;eco:b3072;	PF00015;PF08447;	AAC76107;BAE77122;	EcoCyc:G7595-MONOMER;ECOL316407:JW3043-MONOMER;
P00888	AroF	b2601	-	Novel		Directed motility	DHAP synthase	DHAP synthase	aroF b2601 JW2582	Phospho-2-dehydro-3-deoxyheptonate aldolase, Tyr-sensitive (EC 2.5.1.54) (3-deoxy-D-arabino-heptulosonate 7-phosphate synthase) (DAHP synthase) (Phospho-2-keto-3-deoxyheptonate aldolase)	4 out of 5	aromatic amino acid family biosynthetic process [GO:0009073]; chorismate biosynthetic process [GO:0009423]	ecj:JW2582;eco:b2601;	PF00793;	AAC75650;BAA16487;	EcoCyc:AROF-MONOMER;ECOL316407:JW2582-MONOMER;MetaCyc:AROF-MONOMER;
P0AB91	AroG	b0754	-	Novel		Directed motility	DHAP synthase	DHAP synthase	aroG b0754 JW0737	Phospho-2-dehydro-3-deoxyheptonate aldolase, Phe-sensitive (EC 2.5.1.54) (3-deoxy-D-arabino-heptulosonate 7-phosphate synthase) (DAHP synthase) (Phospho-2-keto-3-deoxyheptonate aldolase)	5 out of 5	aromatic amino acid family biosynthetic process [GO:0009073]; chorismate biosynthetic process [GO:0009423]	ecj:JW0737;eco:b0754;	PF00793;	AAC73841;BAA35416;	EcoCyc:AROG-MONOMER;ECOL316407:JW0737-MONOMER;MetaCyc:AROG-MONOMER;
P00887	AroH	b1704	-	Direct	https://jb.asm.org/content/189/3/950	Directed motility	DHAP synthase	DHAP synthase	aroH b1704 JW1694	Phospho-2-dehydro-3-deoxyheptonate aldolase, Trp-sensitive (EC 2.5.1.54) (3-deoxy-D-arabino-heptulosonate 7-phosphate synthase) (DAHP synthase) (Phospho-2-keto-3-deoxyheptonate aldolase)	4 out of 5	aromatic amino acid family biosynthetic process [GO:0009073]; chorismate biosynthetic process [GO:0009423]	ecj:JW1694;eco:b1704;	PF00793;	AAC74774;BAA15473;	EcoCyc:AROH-MONOMER;ECOL316407:JW1694-MONOMER;MetaCyc:AROH-MONOMER;
P07363	CheA	b1888	Two component system proteins	In BRITE		Directed motility	Chemotaxis signaling	-	cheA b1888 JW1877	Chemotaxis protein CheA (EC 2.7.13.3)	5 out of 5	aerotaxis [GO:0009454]; chemotaxis [GO:0006935]; establishment of localization in cell [GO:0051649]; negative regulation of protein modification process [GO:0031400]; peptidyl-histidine phosphorylation [GO:0018106]; phosphorelay signal transduction system [GO:0000160]; phosphorylation [GO:0016310]; positive regulation of post-translational protein modification [GO:1901875]; protein autophosphoryl…	ecj:JW1877;eco:b1888;	PF01584;PF09078;PF02895;PF02518;PF01627;	AAC74958;BAA15709;	ECOL316407:JW1877-MONOMER;
P07330	CheB	b1883	Two component system proteins	In BRITE		Directed motility	Chemotaxis signaling	Chemotransmission	cheB b1883 JW1872	Protein-glutamate methylesterase/protein-glutamine glutaminase (EC 3.1.1.61) (EC 3.5.1.44) (Chemotaxis response regulator protein-glutamate methylesterase/glutamine deamidase) (Methyl-accepting chemotaxis proteins-specific methylesterase/deamidase) (MCP-specific methylesterase/deamidase)	5 out of 5	chemotaxis [GO:0006935]; protein deamination [GO:0018277]; protein demethylation [GO:0006482]; signal transduction by protein phosphorylation [GO:0023014]	ecj:JW1872;eco:b1883;	PF01339;PF00072;	AAC74953;BAA15699;	EcoCyc:CHEB-MONOMER;ECOL316407:JW1872-MONOMER;MetaCyc:CHEB-MONOMER;
P07364	CheR	b1884	Two component system proteins	In BRITE		Directed motility	Chemotaxis signaling	Chemotransmission	cheR cheX b1884 JW1873	Chemotaxis protein methyltransferase (EC 2.1.1.80)	4 out of 5	chemotaxis [GO:0006935]; protein methylation [GO:0006479]	ecj:JW1873;eco:b1884;	PF01739;PF03705;	AAC74954;BAA15700;	EcoCyc:CHER-MONOMER;ECOL316407:JW1873-MONOMER;MetaCyc:CHER-MONOMER;
P0A964	CheW	b1887	Two component system proteins	In BRITE		Directed motility	Chemotaxis signaling	Chemotransmission	cheW b1887 JW1876	Chemotaxis protein CheW	5 out of 5	aerotaxis [GO:0009454]; chemotaxis [GO:0006935]; establishment of localization in cell [GO:0051649]; positive regulation of post-translational protein modification [GO:1901875]; positive regulation of protein histidine kinase activity [GO:0010864]; signal transduction [GO:0007165]; signal transduction by protein phosphorylation [GO:0023014]	ecj:JW1876;eco:b1887;	PF01584;	AAC74957;BAA15703;	EcoCyc:CHEW-MONOMER;ECOL316407:JW1876-MONOMER;
P0A9H9	CheZ	b1881	Two component system proteins	In BRITE		Directed motility	-	-	cheZ b1881 JW1870	Protein phosphatase CheZ (EC 3.1.3.-) (Chemotaxis protein CheZ)	5 out of 5	archaeal or bacterial-type flagellum-dependent cell motility [GO:0097588]; chemotaxis [GO:0006935]; protein dephosphorylation [GO:0006470]; regulation of chemotaxis [GO:0050920]	ecj:JW1870;eco:b1881;	PF04344;	AAC74951;BAA15697;	EcoCyc:CHEZ-MONOMER;ECOL316407:JW1870-MONOMER;
P45955	CpoB	b0742	-	Novel		Directed motility	-	-	cpoB ybgF b0742 JW0732	Cell division coordinator CpoB	5 out of 5	cell division [GO:0051301]; FtsZ-dependent cytokinesis [GO:0043093]; protein homooligomerization [GO:0051260]; protein trimerization [GO:0070206]	ecj:JW0732;eco:b0742;	PF16331;PF13174;	AAC73836;BAA35408;	EcoCyc:EG12854-MONOMER;ECOL316407:JW0732-MONOMER;
P0AAP1	DgcC	b0385	-	Indirect	https://www.cell.com/action/showPdf?pii=S0092-8674%2810%2900019-X	Directed motility	c-di-GMP synthesis	c-di-GMP synthesis	dgcC adrA yaiC b0385 JW0376	Probable diguanylate cyclase DgcC (DGC) (EC 2.7.7.65)	4 out of 5	cell adhesion involved in single-species biofilm formation [GO:0043709]; negative regulation of bacterial-type flagellum-dependent cell motility [GO:1902201]	ecj:JW0376;eco:b0385;	PF00990;PF05230;	AAC73488;BAE76166;	EcoCyc:EG11257-MONOMER;ECOL316407:JW0376-MONOMER;MetaCyc:EG11257-MONOMER;
P77302	DgcM	b1341	-	Indirect	https://www.cell.com/action/showPdf?pii=S0092-8674%2810%2900019-X	Directed motility	c-di-GMP synthesis	c-di-GMP synthesis	dgcM ydaM b1341 JW5206	Diguanylate cyclase DgcM (DGC) (EC 2.7.7.65)	5 out of 5	cell adhesion involved in single-species biofilm formation [GO:0043709]; negative regulation of bacterial-type flagellum-dependent cell motility [GO:1902201]; positive regulation of DNA-binding transcription factor activity [GO:0051091]; positive regulation of single-species biofilm formation on inanimate substrate [GO:1900233]	ecj:JW5206;eco:b1341;	PF00990;PF08448;	AAC74423;BAA14945;	EcoCyc:G6673-MONOMER;ECOL316407:JW5206-MONOMER;MetaCyc:G6673-MONOMER;
P76330	DgcQ	b1956	-	Direct	https://www.cell.com/action/showPdf?pii=S0092-8674%2810%2900019-X	Directed motility	c-di-GMP synthesis	c-di-GMP synthesis	dgcQ yedQ b1956 JW5832	Probable diguanylate cyclase DgcQ (DGC) (EC 2.7.7.65) (Cellulose synthesis regulatory protein)	5 out of 5	cell adhesion involved in single-species biofilm formation [GO:0043709]; cellulose biosynthetic process [GO:0030244]; negative regulation of bacterial-type flagellum-dependent cell motility [GO:1902201]	ecj:JW5832;eco:b1956;	PF17151;PF00990;	AAC75022;BAA15784;	EcoCyc:G7049-MONOMER;ECOL316407:JW5832-MONOMER;
P75908	DgcT	b1025	-	Direct	https://pubmed.ncbi.nlm.nih.gov/18713317/	Directed motility	c-di-GMP synthesis	c-di-GMP synthesis	dgcT ycdT b1025 JW5143	Probable diguanylate cyclase DgcT (DGC) (EC 2.7.7.65)	5 out of 5	negative regulation of cellular component movement [GO:0051271]; single-species submerged biofilm formation [GO:0090609]	ecj:JW5143;eco:b1025;	PF00990;PF17158;	AAC74110;BAA35810;	EcoCyc:G6532-MONOMER;ECOL316407:JW5143-MONOMER;MetaCyc:G6532-MONOMER;
P31129	DgcZ	b1535	-	Direct	https://pubmed.ncbi.nlm.nih.gov/18713317/	Directed motility	c-di-GMP synthesis	c-di-GMP synthesis	dgcZ ydeG ydeH b1535 JW1528	Diguanylate cyclase DgcZ (DGC) (EC 2.7.7.65) (Zinc-sensory diguanylate cyclase)	5 out of 5	cell adhesion involved in single-species biofilm formation [GO:0043709]; metabolic process [GO:0008152]; negative regulation of bacterial-type flagellum assembly [GO:1902209]; negative regulation of bacterial-type flagellum-dependent cell motility [GO:1902201]; negative regulation of cellular component movement [GO:0051271]; positive regulation of single-species biofilm formation on inanimate sub…	ecj:JW1528;eco:b1535;	PF00990;	AAC74608;BAA18882;	EcoCyc:EG11643-MONOMER;ECOL316407:JW1528-MONOMER;MetaCyc:EG11643-MONOMER;
P0AA89	DosC	b1490	-	Direct	https://www.cell.com/action/showPdf?pii=S0092-8674%2810%2900019-X	Directed motility	c-di-GMP synthesis	c-di-GMP synthesis	dosC dgcO yddV b1490 JW5241	Diguanylate cyclase DosC (DGC) (EC 2.7.7.65) (Direct oxygen-sensing cyclase)	5 out of 5	cell adhesion involved in single-species biofilm formation [GO:0043709]; negative regulation of bacterial-type flagellum-dependent cell motility [GO:1902201]	ecj:JW5241;eco:b1490;	PF00990;	AAC74563;BAA15155;	EcoCyc:G6784-MONOMER;ECOL316407:JW5241-MONOMER;MetaCyc:G6784-MONOMER;
P75933	FlgA	b1072	M,S,P and L rings	In BRITE		Directed motility	Flagellum	-	flgA b1072 JW1059	Flagella basal body P-ring formation protein FlgA	2 out of 5	bacterial-type flagellum assembly [GO:0044780]; bacterial-type flagellum-dependent cell motility [GO:0071973]	ecj:JW1059;eco:b1072;	PF13144;	AAC74156;BAA35880;	EcoCyc:G357-MONOMER;ECOL316407:JW1059-MONOMER;
P0ABW9	FlgB	b1073	Rod, hook and filament	In BRITE		Directed motility	Flagellum	Flagellar basal body	flgB fla FII flbA b1073 JW1060	Flagellar basal body rod protein FlgB (Putative proximal rod protein)	3 out of 5	bacterial-type flagellum-dependent swarming motility [GO:0071978]	ecj:JW1060;eco:b1073;	PF00460;	AAC74157;BAA35881;	EcoCyc:FLGB-FLAGELLAR-MOTOR-ROD-PROTEIN;ECOL316407:JW1060-MONOMER;
P0ABX2	FlgC	b1074	Rod, hook and filament	In BRITE		Directed motility	Flagellum	Flagellar basal body	flgC fla FIII flaW b1074 JW1061	Flagellar basal-body rod protein FlgC (Putative proximal rod protein)	2 out of 5	bacterial-type flagellum-dependent swarming motility [GO:0071978]	ecj:JW1061;eco:b1074;	PF00460;PF06429;	AAC74158;BAA35882;	EcoCyc:FLGC-FLAGELLAR-MOTOR-ROD-PROTEIN;ECOL316407:JW1061-MONOMER;
P75936	FlgD	b1075	Rod, hook and filament	In BRITE		Directed motility	Flagellum	Flagellar basal body	flgD fla FIV flaV b1075 JW1062	Basal-body rod modification protein FlgD	2 out of 5	bacterial-type flagellum-dependent swarming motility [GO:0071978]; bacterial-type flagellum organization [GO:0044781]	ecj:JW1062;eco:b1075;	PF03963;PF13860;PF13861;	AAC74159;BAA35883;	EcoCyc:G360-MONOMER;ECOL316407:JW1062-MONOMER;
P75937	FlgE	b1076	Rod, hook and filament	In BRITE		Directed motility	Flagellum	-	flgE fla FV flaK b1076 JW1063	Flagellar hook protein FlgE	2 out of 5	bacterial-type flagellum-dependent swarming motility [GO:0071978]	ecj:JW1063;eco:b1076;	PF07559;PF00460;PF06429;	AAC74160;BAA35885;	EcoCyc:G361-MONOMER;ECOL316407:JW1063-MONOMER;
P75938	FlgF	b1077	Rod, hook and filament	In BRITE		Directed motility	Flagellum	Flagellar rod	flgF fla FVI flaX b1077 JW1064	Flagellar basal-body rod protein FlgF (Putative proximal rod protein)	3 out of 5	bacterial-type flagellum-dependent cell motility [GO:0071973]; bacterial-type flagellum-dependent swarming motility [GO:0071978]	ecj:JW1064;eco:b1077;	PF00460;PF06429;	AAC74161;BAA35886;	EcoCyc:FLGF-FLAGELLAR-MOTOR-ROD-PROTEIN;ECOL316407:JW1064-MONOMER;
P0ABX5	FlgG	b1078	Rod, hook and filament	In BRITE		Directed motility	Flagellum	-	flgG fla FVII flaL b1078 JW1065	Flagellar basal-body rod protein FlgG (Distal rod protein)	3 out of 5	bacterial-type flagellum-dependent cell motility [GO:0071973]; bacterial-type flagellum-dependent swarming motility [GO:0071978]	ecj:JW1065;eco:b1078;	PF00460;PF06429;	AAC74162;BAA35887;	EcoCyc:FLGG-FLAGELLAR-MOTOR-ROD-PROTEIN;ECOL316407:JW1065-MONOMER;
P0A6S0	FlgH	b1079	M,S,P and L rings	In BRITE		Directed motility	Flagellum	L- and P-rings	flgH fla FVIII flaY b1079 JW5153	Flagellar L-ring protein (Basal body L-ring protein)	3 out of 5	bacterial-type flagellum-dependent cell motility [GO:0071973]; response to osmotic stress [GO:0006970]	ecj:JW5153;eco:b1079;	PF02107;	AAC74163;BAA35888;	EcoCyc:FLGH-FLAGELLAR-L-RING;ECOL316407:JW5153-MONOMER;
P0A6S3	FlgI	b1080	M,S,P and L rings	In BRITE		Directed motility	Flagellum	L- and P-rings	flgI fla FIX flaM b1080 JW1067	Flagellar P-ring protein (Basal body P-ring protein)	4 out of 5	bacterial-type flagellum-dependent cell motility [GO:0071973]; cellular response to DNA damage stimulus [GO:0006974]	ecj:JW1067;eco:b1080;	PF02119;	AAC74164;BAA35889;	EcoCyc:FLGI-FLAGELLAR-P-RING;ECOL316407:JW1067-MONOMER;
P75942	FlgJ	b1081	Rod, hook and filament	In BRITE		Directed motility	Flagellum	Flagellar rod	flgJ fla FX flaZ b1081 JW1068	Peptidoglycan hydrolase FlgJ (EC 3.2.1.-) (Muramidase FlgJ)	3 out of 5	bacterial-type flagellum assembly [GO:0044780]; bacterial-type flagellum-dependent cell motility [GO:0071973]; cell wall organization [GO:0071555]; metabolic process [GO:0008152]	ecj:JW1068;eco:b1081;	PF01832;PF10135;	AAC74165;BAA35890;	EcoCyc:G366-MONOMER;ECOL316407:JW1068-MONOMER;
P33235	FlgK	b1082	Rod, hook and filament	In BRITE		Directed motility	Flagellum	-	flgK flaS flaW b1082 JW1069	Flagellar hook-associated protein 1 (HAP1)	2 out of 5	bacterial-type flagellum assembly [GO:0044780]; bacterial-type flagellum-dependent cell motility [GO:0071973]	ecj:JW1069;eco:b1082;	PF00460;PF06429;	AAC74166;BAA35891;	EcoCyc:EG11967-MONOMER;ECOL316407:JW1069-MONOMER;
P29744	FlgL	b1083	Rod, hook and filament	In BRITE		Directed motility	Flagellum	Flagellar filament	flgL flaT flaU b1083 JW1070	Flagellar hook-associated protein 3 (HAP3) (Hook-filament junction protein)	2 out of 5	bacterial-type flagellum-dependent cell motility [GO:0071973]	ecj:JW1070;eco:b1083;	PF00669;	AAC74167;BAA35892;	EcoCyc:EG11545-MONOMER;ECOL316407:JW1070-MONOMER;
P0AEM4	FlgM	b1071	Regulation	In BRITE		Directed motility	Flagellum	-	flgM b1071 JW1058	Negative regulator of flagellin synthesis (Anti-sigma-28 factor)	3 out of 5	bacterial-type flagellum organization [GO:0044781]; negative regulation of proteolysis [GO:0045861]; negative regulation of transcription, DNA-templated [GO:0045892]	ecj:JW1058;eco:b1071;	PF04316;	AAC74155;BAA35879;	EcoCyc:G369-MONOMER;ECOL316407:JW1058-MONOMER;
P43533	FlgN	b1070	Chaperones	In BRITE		Directed motility	Flagellum	-	flgN b1070 JW1057	Flagella synthesis protein FlgN	2 out of 5	bacterial-type flagellum assembly [GO:0044780]	ecj:JW1057;eco:b1070;	PF05130;	AAC74154;BAA35878;	EcoCyc:G6562-MONOMER;ECOL316407:JW1057-MONOMER;
P76298	FlhA	b1879	Type-III secretion	In BRITE		Directed motility	Flagellum	Flagellar basal body	flhA b1879 JW1868	Flagellar biosynthesis protein FlhA	3 out of 5	bacterial-type flagellum assembly [GO:0044780]; protein secretion [GO:0009306]	ecj:JW1868;eco:b1879;	PF00771;	AAC74949;BAA15688;	EcoCyc:G370-MONOMER;ECOL316407:JW1868-MONOMER;
P76299	FlhB	b1880	Type-III secretion	In BRITE		Directed motility	Flagellum	-	flhB yecQ b1880 JW1869	Flagellar biosynthetic protein FlhB	3 out of 5	bacterial-type flagellum assembly [GO:0044780]; protein secretion [GO:0009306]	ecj:JW1869;eco:b1880;	PF01312;	AAC74950;BAA15696;	EcoCyc:G7028-MONOMER;ECOL316407:JW1869-MONOMER;
P04949	FliC	b1923	Rod, hook and filament	In BRITE		Directed motility	Flagellum	Flagellar filament	fliC flaF hag b1923 JW1908	Flagellin	3 out of 5	bacterial-type flagellum-dependent cell motility [GO:0071973]	ecj:JW1908;eco:b1923;	PF00700;PF08884;PF00669;	AAC74990;BAA15751;	EcoCyc:EG10321-MONOMER;ECOL316407:JW1908-MONOMER;
P24216	FliD	b1924	Rod, hook and filament	In BRITE		Directed motility	-	-	fliD flaV flbC b1924 JW1909	Flagellar hook-associated protein 2 (HAP2) (Filament cap protein) (Flagellar cap protein)	4 out of 5	bacterial-type flagellum-dependent cell motility [GO:0071973]; cell adhesion [GO:0007155]	ecj:JW1909;eco:b1924;	PF07195;PF02465;	AAC74991;BAA15752;	EcoCyc:EG10841-MONOMER;ECOL316407:JW1909-MONOMER;
P0A8T5	FliE	b1937	Rod, hook and filament	In BRITE		Directed motility	Flagellum	Flagellar basal body	fliE fla AI flaN b1937 JW1921	Flagellar hook-basal body complex protein FliE	2 out of 5	bacterial-type flagellum-dependent cell motility [GO:0071973]	ecj:JW1921;eco:b1937;	PF02049;	AAC75004;BAA15760;	EcoCyc:EG11346-MONOMER;ECOL316407:JW1921-MONOMER;
P25798	FliF	b1938	M,S,P and L rings	In BRITE		Directed motility	Flagellum	Flagellar basal body	fliF fla AII.1 fla BI b1938 JW1922	Flagellar M-ring protein	3 out of 5	bacterial-type flagellum-dependent cell motility [GO:0071973]	ecj:JW1922;eco:b1938;	PF01514;PF08345;	AAC75005;BAA15763;	EcoCyc:FLIF-FLAGELLAR-MS-RING;ECOL316407:JW1922-MONOMER;
P0ABZ1	FliG	b1939	C-ring	In BRITE		Directed motility	Flagellum	-	fliG fla AII.2 fla BII b1939 JW1923	Flagellar motor switch protein FliG	5 out of 5	bacterial-type flagellum assembly [GO:0044780]; bacterial-type flagellum-dependent cell motility [GO:0071973]; chemotaxis [GO:0006935]	ecj:JW1923;eco:b1939;	PF01706;PF14841;PF14842;	AAC75006;BAA15764;	EcoCyc:FLIG-FLAGELLAR-SWITCH-PROTEIN;ECOL316407:JW1923-MONOMER;
P31068	FliH	b1940	Type-III secretion	In BRITE		Directed motility	Flagellum	-	fliH fla AII.3 fla BIII b1940 JW1924	Flagellar assembly protein FliH	3 out of 5	bacterial-type flagellum-dependent cell motility [GO:0071973]; bacterial-type flagellum organization [GO:0044781]; protein transport [GO:0015031]	ecj:JW1924;eco:b1940;	PF02108;	AAC75007;BAA15765;	EcoCyc:EG11656-MONOMER;ECOL316407:JW1924-MONOMER;
P52613	FliJ	b1942	Chaperones	In BRITE		Directed motility	Flagellum	-	fliJ flaO flaS b1942 JW1926	Flagellar FliJ protein	3 out of 5	bacterial-type flagellum-dependent cell motility [GO:0071973]; bacterial-type flagellum organization [GO:0044781]; chemotaxis [GO:0006935]; protein transport [GO:0015031]	ecj:JW1926;eco:b1942;	PF02050;	AAC75009;BAA15767;	EcoCyc:G378-MONOMER;ECOL316407:JW1926-MONOMER;
P52614	FliK	b1943	Rod, hook and filament	In BRITE		Directed motility	Flagellum	-	fliK flaE flaR b1943 JW1927	Flagellar hook-length control protein	2 out of 5	bacterial-type flagellum assembly [GO:0044780]; bacterial-type flagellum-dependent cell motility [GO:0071973]	ecj:JW1927;eco:b1943;	PF02120;	AAC75010;BAA15768;	EcoCyc:G379-MONOMER;ECOL316407:JW1927-MONOMER;
P0ABX8	FliL	b1944	Rod, hook and filament	In BRITE		Directed motility	Flagellum	Flagellar basal body	fliL cheC1 fla AI fla QI b1944 JW1928	Flagellar protein FliL	3 out of 5	bacterial-type flagellum-dependent swarming motility [GO:0071978]; chemotaxis [GO:0006935]	ecj:JW1928;eco:b1944;	PF03748;	AAC75011;BAA15769;	EcoCyc:EG10322-MONOMER;ECOL316407:JW1928-MONOMER;
P52612	FliI	b1941	Type-III secretion	In BRITE		Directed motility	Flagellum	Flagellar basal body	fliI fla AIII flaC b1941 JW1925	Flagellum-specific ATP synthase (EC 7.1.2.2)	4 out of 5	ATP biosynthetic process [GO:0006754]; bacterial-type flagellum assembly [GO:0044780]; bacterial-type flagellum-dependent cell motility [GO:0071973]; ion transport [GO:0006811]; protein secretion by the type III secretion system [GO:0030254]	ecj:JW1925;eco:b1941;	PF00006;PF18269;	AAC75008;BAA15766;	EcoCyc:G377-MONOMER;ECOL316407:JW1925-MONOMER;
P06974	FliM	b1945	C-ring	In BRITE		Directed motility	Flagellum	Flagellar basal body	fliM cheC2 fla AII fla QII b1945 JW1929	Flagellar motor switch protein FliM	5 out of 5	bacterial-type flagellum-dependent cell motility [GO:0071973]; positive chemotaxis [GO:0050918]	ecj:JW1929;eco:b1945;	PF02154;PF01052;	AAC75012;BAA15770;	EcoCyc:FLIM-FLAGELLAR-C-RING-SWITCH;ECOL316407:JW1929-MONOMER;
P15070	FliN	b1946	C-ring	In BRITE		Directed motility	Flagellum	-	fliN flaN motD b1946 JW1930	Flagellar motor switch protein FliN	3 out of 5	bacterial-type flagellum-dependent cell motility [GO:0071973]; chemotaxis [GO:0006935]	ecj:JW1930;eco:b1946;	PF01052;PF16973;	AAC75013;BAA15771;	EcoCyc:FLIN-FLAGELLAR-C-RING-SWITCH;ECOL316407:JW1930-MONOMER;
P22586	FliO	b1947	Type-III secretion	In BRITE		Directed motility	Flagellum	-	fliO flaP flbD b1947 JW5316	Flagellar protein FliO	2 out of 5	archaeal or bacterial-type flagellum-dependent cell motility [GO:0097588]; bacterial-type flagellum organization [GO:0044781]; chemotaxis [GO:0006935]	ecj:JW5316;eco:b1947;	PF04347;	AAC75014;BAA15772;	EcoCyc:EG11224-MONOMER;ECOL316407:JW5316-MONOMER;
P0AC05	FliP	b1948	Type-III secretion	In BRITE		Directed motility	Flagellum	Flagellar basal body	fliP flaR b1948 JW1932	Flagellar biosynthetic protein FliP	3 out of 5	bacterial-type flagellum organization [GO:0044781]; protein secretion [GO:0009306]	ecj:JW1932;eco:b1948;	PF00813;	AAC75015;BAA15773;	EcoCyc:EG11975-MONOMER;ECOL316407:JW1932-MONOMER;
P0AC07	FliQ	b1949	Type-III secretion	In BRITE		Directed motility	Flagellum	Flagellar basal body	fliQ flaQ b1949 JW1933	Flagellar biosynthetic protein FliQ	2 out of 5	bacterial-type flagellum assembly [GO:0044780]; protein secretion [GO:0009306]	ecj:JW1933;eco:b1949;	PF01313;	AAC75016;BAA15774;	EcoCyc:EG11976-MONOMER;ECOL316407:JW1933-MONOMER;
P33135	FliR	b1950	Type-III secretion	In BRITE		Directed motility	Flagellum	Flagellar basal body	fliR flaP b1950 JW1934	Flagellar biosynthetic protein FliR	3 out of 5	bacterial-type flagellum assembly [GO:0044780]; protein targeting [GO:0006605]	ecj:JW1934;eco:b1950;	PF01311;	AAC75017;BAA15775;	EcoCyc:EG11977-MONOMER;ECOL316407:JW1934-MONOMER;
P26608	FliS	b1925	Chaperones	In BRITE		Directed motility	Flagellum	-	fliS b1925 JW1910	Flagellar secretion chaperone FliS	2 out of 5	bacterial-type flagellum assembly [GO:0044780]; bacterial-type flagellum-dependent cell motility [GO:0071973]	ecj:JW1910;eco:b1925;	PF02561;	AAC74992;BAA15753;	EcoCyc:EG11388-MONOMER;ECOL316407:JW1910-MONOMER;
P39375	IraD	b4326	-	Novel		Directed motility	Unannotated	-	iraD yjiD b4326 JW5782	Anti-adapter protein IraD	4 out of 5	cellular response to DNA damage stimulus [GO:0006974]; cellular response to oxidative stress [GO:0034599]; negative regulation of protein catabolic process [GO:0042177]	ecj:JW5782;eco:b4326;	PF04965;	AAC77282;BAE78319;	EcoCyc:G7923-MONOMER;ECOL316407:JW5782-MONOMER;
Q47154	LafU	b0230	NA	NA	NA	NA	NA	NA	lafU mbhA b0230 JW5812	Putative truncated flagellar export/assembly protein LafU	2 out of 5			PF00691;
Q47153	LfhA	b0229	NA	NA	NA	NA	NA	NA	lfhA fhiA b0229 JW5811	Putative truncated flagellar export/assembly protein LfhA	2 out of 5	bacterial-type flagellum assembly [GO:0044780]; protein secretion [GO:0009306]		PF00771;
P09348	MotA	b1890	Motor/switch	1		Directed motility	Flagellum	Flagellar rotation	motA flaJ b1890 JW1879	Motility protein A (Chemotaxis protein MotA)	4 out of 5	bacterial-type flagellum-dependent cell motility [GO:0071973]; bacterial-type flagellum-dependent swarming motility [GO:0071978]; chemotaxis [GO:0006935]; ion transport [GO:0006811]	ecj:JW1879;eco:b1890;	PF01618;	AAC74960;BAA15711;	EcoCyc:MOTA-FLAGELLAR-MOTOR-STATOR-PROTEIN;ECOL316407:JW1879-MONOMER;
P0AF06	MotB	b1889	Motor/switch	1		Directed motility	Flagellum	Flagellar rotation	motB b1889 JW1878	Motility protein B (Chemotaxis protein MotB)	5 out of 5	archaeal or bacterial-type flagellum-dependent cell motility [GO:0097588]; chemotaxis [GO:0006935]	ecj:JW1878;eco:b1889;	PF13677;PF00691;	AAC74959;BAA15710;	EcoCyc:MOTB-FLAGELLAR-MOTOR-STATOR-PROTEIN;ECOL316407:JW1878-MONOMER;
P36647	PpdD	b0108	-	Novel		Directed motility	-	-	ppdD b0108 JW0104	Prepilin peptidase-dependent protein D	2 out of 5		ecj:JW0104;eco:b0108;	PF07963;	AAC73219;BAB96678;	EcoCyc:EG12107-MONOMER;ECOL316407:JW0104-MONOMER;
P0AGE4	SstT	b3089	-	Novel		Directed motility	-	-	sstT ygjU b3089 JW3060	Serine/threonine transporter SstT (Na(+)/serine-threonine symporter)	5 out of 5	amino acid transport [GO:0006865]; serine transport [GO:0032329]; threonine transport [GO:0015826]	ecj:JW3060;eco:b3089;	PF00375;	AAC76124;BAE77139;	EcoCyc:YGJU-MONOMER;ECOL316407:JW3060-MONOMER;MetaCyc:YGJU-MONOMER;
P07018	Tap	b1885	MCPs	1		Directed motility	Chemotaxis signaling	Chemoreception	tap b1885 JW1874	Methyl-accepting chemotaxis protein IV (MCP-IV) (Dipeptide chemoreceptor protein)	4 out of 5	chemotaxis [GO:0006935]; signal transduction [GO:0007165]	ecj:JW1874;eco:b1885;	PF00672;PF00015;PF02203;	AAC74955;BAA15701;	EcoCyc:TAP-MONOMER;ECOL316407:JW1874-MONOMER;
P07017	Tar	b1886	MCPs	1		Directed motility	Chemotaxis signaling	Chemoreception	tar cheM b1886 JW1875	Methyl-accepting chemotaxis protein II (MCP-II) (Aspartate chemoreceptor protein)	5 out of 5	cellular response to amino acid stimulus [GO:0071230]; chemotaxis [GO:0006935]; detection of chemical stimulus [GO:0009593]; positive regulation of post-translational protein modification [GO:1901875]; regulation of chemotaxis [GO:0050920]; signal complex assembly [GO:0007172]; signal transduction [GO:0007165]	ecj:JW1875;eco:b1886;	PF00672;PF00015;PF02203;	AAC74956;BAA15702;	EcoCyc:TAR-MONOMER;ECOL316407:JW1875-MONOMER;
P05704	Trg	b1421	MCPs	1		Directed motility	Chemotaxis signaling	Chemoreception	trg b1421 JW1417	Methyl-accepting chemotaxis protein III (MCP-III) (Ribose and galactose chemoreceptor protein)	5 out of 5	chemotaxis [GO:0006935]; signal transduction [GO:0007165]	ecj:JW1417;eco:b1421;	PF00672;PF00015;PF02203;	AAC74503;BAA15044;	EcoCyc:TRG-MONOMER;ECOL316407:JW1417-MONOMER;
P02942	Tsr	b4355	MCPs	1		Directed motility	Chemotaxis signaling	Chemoreception	tsr cheD b4355 JW4318	Methyl-accepting chemotaxis protein I (MCP-I) (Serine chemoreceptor protein)	5 out of 5	cell motility [GO:0048870]; cellular response to amino acid stimulus [GO:0071230]; chemotaxis [GO:0006935]; detection of chemical stimulus [GO:0009593]; receptor clustering [GO:0043113]; regulation of bacterial-type flagellum-dependent cell motility [GO:1902021]; regulation of chemotaxis [GO:0050920]; regulation of protein histidine kinase activity [GO:0032110]; response to amino acid [GO:0043200…	ecj:JW4318;eco:b4355;	PF00672;PF00015;PF02203;	AAC77311;BAE78345;	EcoCyc:TSR-MONOMER;ECOL316407:JW4318-MONOMER;
P77354	YafU	b0218	-	Novel		Directed motility	Unannotated	-	yafU b0218 JW0207	Putative inner membrane protein YafU	2 out of 5		ecj:JW0207;		BAE76046;	ECOL316407:JW0207-MONOMER;
P76010	YcgR	b1194	-	Direct	https://www.cell.com/fulltext/S1097-2765(10)00200-5	Directed motility	-	-	ycgR b1194 JW1183	Flagellar brake protein YcgR (Cyclic di-GMP binding protein YcgR)	5 out of 5	bacterial-type flagellum-dependent cell motility [GO:0071973]; regulation of bacterial-type flagellum-dependent cell motility by regulation of motor speed [GO:0071945]	ecj:JW1183;eco:b1194;	PF07238;PF07317;	AAC74278;BAA36052;	EcoCyc:G6623-MONOMER;ECOL316407:JW1183-MONOMER;
P46855	YhhZ	b3442	-	Direct	https://jb.asm.org/content/189/3/950	Directed motility	Unannotated	-	yhhZ b3442 JW3406	Uncharacterized protein YhhZ	1 out of 5		ecj:JW3406;eco:b3442;	PF05638;	AAC76467;BAE77851;	EcoCyc:G7759-MONOMER;ECOL316407:JW3406-MONOMER;

## Sheet: Module_Designation
Spectral Depth 50			Spectral Depth 300			Spectral Depth 1000
Module: Directed Motility			Module: Chemotaxis signaling			Module: Chemoreception
P00887	AroH		P02942	Tsr		P02942	Tsr
P0AB91	AroG		P07018	Tap		P07018	Tap
P00888	AroF		P50466	Aer		P50466	Aer
P0A9H9	CheZ		P07017	Tar		P07017	Tar
P24216	FliD		P05704	Trg		P05704	Trg
P43533	FlgN		P07330	CheB
P76010	YcgR		P07364	CheR		Module: Chemotransmission
P0AGE4	SstT		P0A964	CheW		P07364	CheR
P36647	PpdD		P07363	CheA		P0A964	CheW
P45955	CpoB					P07363	CheA
P39375	IraD		Module: c-di-GMP synthesis
P46855	YhhZ		P0AA89	DosC		Module: Flagellar Rotation
P77354	YafU		P76330	DgcQ		P09348	MotA
P02942	Tsr		P77302	DgcM		P0AF06	MotB
P07018	Tap		P0AAP1	DgcC		Q47154	LafU
P50466	Aer		P31129	DgcZ
P07017	Tar		P75908	DgcT		Module: Flagellar filament
P05704	Trg					P04949	FliC
P07330	CheB		Module: Unannotated			P29744	FlgL
P07364	CheR		P39375	IraD
P0A964	CheW		P46855	YhhZ		Module: Flagellar Rod
P07363	CheA		P77354	YafU		P75938	FlgF
P0AA89	DosC					P75942	FlgJ
P76330	DgcQ		Module: DHAP synthase
P77302	DgcM		P00887	AroH		Module: Flagellar L- and P- ring
P0AAP1	DgcC		P0AB91	AroG		P0A6S0	FlgH
P31129	DgcZ		P00888	AroF		P0A6S3	FlgI
P75908	DgcT
P04949	FliC		Module: Flagellum			Module: Flagellar basal body
P29744	FlgL		P04949	FliC		P75936	FlgD
P0ABX8	FliL		P29744	FlgL		P0A8T5	FliE
P52614	FliK		P0ABX8	FliL		P0ABW9	FlgB
P26608	FliS		P52614	FliK		P0ABX2	FlgC
P33235	FlgK		P26608	FliS		P0AC05	FliP
P75937	FlgE		P33235	FlgK		P33135	FliR
P0ABX5	FlgG		P75937	FlgE		P52612	FliI
P0A6S0	FlgH		P0ABX5	FlgG		P06974	FliM
P0A6S3	FlgI		P0A6S0	FlgH		P76298	FlhA
P75933	FlgA		P0A6S3	FlgI		P0AC07	FliQ
P75938	FlgF		P75933	FlgA		P25798	FliF
P75942	FlgJ		P75938	FlgF
P06974	FliM		P75942	FlgJ		Module: DHAP synthase
P75936	FlgD		P06974	FliM		P00887	AroH
P0ABZ1	FliG		P75936	FlgD		P0AB91	AroG
P0A8T5	FliE		P0ABZ1	FliG		P00888	AroF
P0ABW9	FlgB		P0A8T5	FliE
P0ABX2	FlgC		P0ABW9	FlgB
P0AC05	FliP		P0ABX2	FlgC
P33135	FliR		P0AC05	FliP
P0AC07	FliQ		P33135	FliR
P25798	FliF		P0AC07	FliQ
P76298	FlhA		P25798	FliF
Q47153	LfhA		P76298	FlhA
P15070	FliN		Q47153	LfhA
P52612	FliI		P15070	FliN
P76299	FlhB		P52612	FliI
P09348	MotA		P76299	FlhB
P0AF06	MotB		P09348	MotA
Q47154	LafU		P0AF06	MotB
P0AEM4	FlgM		Q47154	LafU
P22586	FliO		P0AEM4	FlgM
P52613	FliJ		P22586	FliO
P31068	FliH		P52613	FliJ
			P31068	FliH

## Sheet: SD50
	AroH	AroG	AroF	CheZ	FliD	FlgN	YcgR	SstT	PpdD	CpoB	IraD	YhhZ	YafU	Tsr	Tap	Aer	Tar	Trg	CheB	CheR	CheW	CheA	DosC	DgcQ	DgcM	DgcC	DgcZ	DgcT	FliC	FlgL	FliL	FliK	FliS	FlgK	FlgE	FlgG	FlgH	FlgI	FlgA	FlgF	FlgJ	FliM	FlgD	FliG	FliE	FlgB	FlgC	FliP	FliR
AroH	1	1	1	1	1	1	1	1	1	1	1	1	1	1	1	1	1	1	1	1	1	1	1	1	1	1	1	1	1	1	1	1	1	1	1	1	1	1	1	1	1	1	1	1	1	1	1	1	1
AroG	1	1	1	1	1	1	1	1	1	1	1	1	1	1	1	1	1	1	1	1	1	1	1	1	1	1	1	1	1	1	1	1	1	1	1	1	1	1	1	1	1	1	1	1	1	1	1	1	1
AroF	1	1	1	1	1	1	1	1	1	1	1	1	1	1	1	1	1	1	1	1	1	1	1	1	1	1	1	1	1	1	1	1	1	1	1	1	1	1	1	1	1	1	1	1	1	1	1	1	1
CheZ	1	1	1	1	1	1	1	1	1	1	1	1	1	1	1	1	1	1	1	1	1	1	1	1	1	1	1	1	1	1	1	1	1	1	1	1	1	1	1	1	1	1	1	1	1	1	1	1	1
FliD	1	1	1	1	1	1	1	1	1	1	1	1	1	1	1	1	1	1	1	1	1	1	1	1	1	1	1	1	1	1	1	1	1	1	1	1	1	1	1	1	1	1	1	1	1	1	1	1	1
FlgN	1	1	1	1	1	1	1	1	1	1	1	1	1	1	1	1	1	1	1	1	1	1	1	1	1	1	1	1	1	1	1	1	1	1	1	1	1	1	1	1	1	1	1	1	1	1	1	1	1
YcgR	1	1	1	1	1	1	1	1	1	1	1	1	1	1	1	1	1	1	1	1	1	1	1	1	1	1	1	1	1	1	1	1	1	1	1	1	1	1	1	1	1	1	1	1	1	1	1	1	1
SstT	1	1	1	1	1	1	1	1	1	1	1	1	1	1	1	1	1	1	1	1	1	1	1	1	1	1	1	1	1	1	1	1	1	1	1	1	1	1	1	1	1	1	1	1	1	1	1	1	1
PpdD	1	1	1	1	1	1	1	1	1	1	1	1	1	1	1	1	1	1	1	1	1	1	1	1	1	1	1	1	1	1	1	1	1	1	1	1	1	1	1	1	1	1	1	1	1	1	1	1	1
CpoB	1	1	1	1	1	1	1	1	1	1	1	1	1	1	1	1	1	1	1	1	1	1	1	1	1	1	1	1	1	1	1	1	1	1	1	1	1	1	1	1	1	1	1	1	1	1	1	1	1
IraD	1	1	1	1	1	1	1	1	1	1	1	1	1	1	1	1	1	1	1	1	1	1	1	1	1	1	1	1	1	1	1	1	1	1	1	1	1	1	1	1	1	1	1	1	1	1	1	1	1
YhhZ	1	1	1	1	1	1	1	1	1	1	1	1	1	1	1	1	1	1	1	1	1	1	1	1	1	1	1	1	1	1	1	1	1	1	1	1	1	1	1	1	1	1	1	1	1	1	1	1	1
YafU	1	1	1	1	1	1	1	1	1	1	1	1	1	1	1	1	1	1	1	1	1	1	1	1	1	1	1	1	1	1	1	1	1	1	1	1	1	1	1	1	1	1	1	1	1	1	1	1	1
Tsr	1	1	1	1	1	1	1	1	1	1	1	1	1	1	1	1	1	1	1	1	1	1	1	1	1	1	1	1	1	1	1	1	1	1	1	1	1	1	1	1	1	1	1	1	1	1	1	1	1
Tap	1	1	1	1	1	1	1	1	1	1	1	1	1	1	1	1	1	1	1	1	1	1	1	1	1	1	1	1	1	1	1	1	1	1	1	1	1	1	1	1	1	1	1	1	1	1	1	1	1
Aer	1	1	1	1	1	1	1	1	1	1	1	1	1	1	1	1	1	1	1	1	1	1	1	1	1	1	1	1	1	1	1	1	1	1	1	1	1	1	1	1	1	1	1	1	1	1	1	1	1
Tar	1	1	1	1	1	1	1	1	1	1	1	1	1	1	1	1	1	1	1	1	1	1	1	1	1	1	1	1	1	1	1	1	1	1	1	1	1	1	1	1	1	1	1	1	1	1	1	1	1
Trg	1	1	1	1	1	1	1	1	1	1	1	1	1	1	1	1	1	1	1	1	1	1	1	1	1	1	1	1	1	1	1	1	1	1	1	1	1	1	1	1	1	1	1	1	1	1	1	1	1
CheB	1	1	1	1	1	1	1	1	1	1	1	1	1	1	1	1	1	1	1	1	1	1	1	1	1	1	1	1	1	1	1	1	1	1	1	1	1	1	1	1	1	1	1	1	1	1	1	1	1
CheR	1	1	1	1	1	1	1	1	1	1	1	1	1	1	1	1	1	1	1	1	1	1	1	1	1	1	1	1	1	1	1	1	1	1	1	1	1	1	1	1	1	1	1	1	1	1	1	1	1
CheW	1	1	1	1	1	1	1	1	1	1	1	1	1	1	1	1	1	1	1	1	1	1	1	1	1	1	1	1	1	1	1	1	1	1	1	1	1	1	1	1	1	1	1	1	1	1	1	1	1
CheA	1	1	1	1	1	1	1	1	1	1	1	1	1	1	1	1	1	1	1	1	1	1	1	1	1	1	1	1	1	1	1	1	1	1	1	1	1	1	1	1	1	1	1	1	1	1	1	1	1
DosC	1	1	1	1	1	1	1	1	1	1	1	1	1	1	1	1	1	1	1	1	1	1	1	1	1	1	1	1	1	1	1	1	1	1	1	1	1	1	1	1	1	1	1	1	1	1	1	1	1
DgcQ	1	1	1	1	1	1	1	1	1	1	1	1	1	1	1	1	1	1	1	1	1	1	1	1	1	1	1	1	1	1	1	1	1	1	1	1	1	1	1	1	1	1	1	1	1	1	1	1	1
DgcM	1	1	1	1	1	1	1	1	1	1	1	1	1	1	1	1	1	1	1	1	1	1	1	1	1	1	1	1	1	1	1	1	1	1	1	1	1	1	1	1	1	1	1	1	1	1	1	1	1
DgcC	1	1	1	1	1	1	1	1	1	1	1	1	1	1	1	1	1	1	1	1	1	1	1	1	1	1	1	1	1	1	1	1	1	1	1	1	1	1	1	1	1	1	1	1	1	1	1	1	1
DgcZ	1	1	1	1	1	1	1	1	1	1	1	1	1	1	1	1	1	1	1	1	1	1	1	1	1	1	1	1	1	1	1	1	1	1	1	1	1	1	1	1	1	1	1	1	1	1	1	1	1
DgcT	1	1	1	1	1	1	1	1	1	1	1	1	1	1	1	1	1	1	1	1	1	1	1	1	1	1	1	1	1	1	1	1	1	1	1	1	1	1	1	1	1	1	1	1	1	1	1	1	1
FliC	1	1	1	1	1	1	1	1	1	1	1	1	1	1	1	1	1	1	1	1	1	1	1	1	1	1	1	1	1	1	1	1	1	1	1	1	1	1	1	1	1	1	1	1	1	1	1	1	1
FlgL	1	1	1	1	1	1	1	1	1	1	1	1	1	1	1	1	1	1	1	1	1	1	1	1	1	1	1	1	1	1	1	1	1	1	1	1	1	1	1	1	1	1	1	1	1	1	1	1	1
FliL	1	1	1	1	1	1	1	1	1	1	1	1	1	1	1	1	1	1	1	1	1	1	1	1	1	1	1	1	1	1	1	1	1	1	1	1	1	1	1	1	1	1	1	1	1	1	1	1	1
FliK	1	1	1	1	1	1	1	1	1	1	1	1	1	1	1	1	1	1	1	1	1	1	1	1	1	1	1	1	1	1	1	1	1	1	1	1	1	1	1	1	1	1	1	1	1	1	1	1	1
FliS	1	1	1	1	1	1	1	1	1	1	1	1	1	1	1	1	1	1	1	1	1	1	1	1	1	1	1	1	1	1	1	1	1	1	1	1	1	1	1	1	1	1	1	1	1	1	1	1	1
FlgK	1	1	1	1	1	1	1	1	1	1	1	1	1	1	1	1	1	1	1	1	1	1	1	1	1	1	1	1	1	1	1	1	1	1	1	1	1	1	1	1	1	1	1	1	1	1	1	1	1
FlgE	1	1	1	1	1	1	1	1	1	1	1	1	1	1	1	1	1	1	1	1	1	1	1	1	1	1	1	1	1	1	1	1	1	1	1	1	1	1	1	1	1	1	1	1	1	1	1	1	1
FlgG	1	1	1	1	1	1	1	1	1	1	1	1	1	1	1	1	1	1	1	1	1	1	1	1	1	1	1	1	1	1	1	1	1	1	1	1	1	1	1	1	1	1	1	1	1	1	1	1	1
FlgH	1	1	1	1	1	1	1	1	1	1	1	1	1	1	1	1	1	1	1	1	1	1	1	1	1	1	1	1	1	1	1	1	1	1	1	1	1	1	1	1	1	1	1	1	1	1	1	1	1
FlgI	1	1	1	1	1	1	1	1	1	1	1	1	1	1	1	1	1	1	1	1	1	1	1	1	1	1	1	1	1	1	1	1	1	1	1	1	1	1	1	1	1	1	1	1	1	1	1	1	1
FlgA	1	1	1	1	1	1	1	1	1	1	1	1	1	1	1	1	1	1	1	1	1	1	1	1	1	1	1	1	1	1	1	1	1	1	1	1	1	1	1	1	1	1	1	1	1	1	1	1	1
FlgF	1	1	1	1	1	1	1	1	1	1	1	1	1	1	1	1	1	1	1	1	1	1	1	1	1	1	1	1	1	1	1	1	1	1	1	1	1	1	1	1	1	1	1	1	1	1	1	1	1
FlgJ	1	1	1	1	1	1	1	1	1	1	1	1	1	1	1	1	1	1	1	1	1	1	1	1	1	1	1	1	1	1	1	1	1	1	1	1	1	1	1	1	1	1	1	1	1	1	1	1	1
FliM	1	1	1	1	1	1	1	1	1	1	1	1	1	1	1	1	1	1	1	1	1	1	1	1	1	1	1	1	1	1	1	1	1	1	1	1	1	1	1	1	1	1	1	1	1	1	1	1	1
FlgD	1	1	1	1	1	1	1	1	1	1	1	1	1	1	1	1	1	1	1	1	1	1	1	1	1	1	1	1	1	1	1	1	1	1	1	1	1	1	1	1	1	1	1	1	1	1	1	1	1
FliG	1	1	1	1	1	1	1	1	1	1	1	1	1	1	1	1	1	1	1	1	1	1	1	1	1	1	1	1	1	1	1	1	1	1	1	1	1	1	1	1	1	1	1	1	1	1	1	1	1
FliE	1	1	1	1	1	1	1	1	1	1	1	1	1	1	1	1	1	1	1	1	1	1	1	1	1	1	1	1	1	1	1	1	1	1	1	1	1	1	1	1	1	1	1	1	1	1	1	1	1
FlgB	1	1	1	1	1	1	1	1	1	1	1	1	1	1	1	1	1	1	1	1	1	1	1	1	1	1	1	1	1	1	1	1	1	1	1	1	1	1	1	1	1	1	1	1	1	1	1	1	1
FlgC	1	1	1	1	1	1	1	1	1	1	1	1	1	1	1	1	1	1	1	1	1	1	1	1	1	1	1	1	1	1	1	1	1	1	1	1	1	1	1	1	1	1	1	1	1	1	1	1	1
FliP	1	1	1	1	1	1	1	1	1	1	1	1	1	1	1	1	1	1	1	1	1	1	1	1	1	1	1	1	1	1	1	1	1	1	1	1	1	1	1	1	1	1	1	1	1	1	1	1	1
FliR	1	1	1	1	1	1	1	1	1	1	1	1	1	1	1	1	1	1	1	1	1	1	1	1	1	1	1	1	1	1	1	1	1	1	1	1	1	1	1	1	1	1	1	1	1	1	1	1	1
FliQ	1	1	1	1	1	1	1	1	1	1	1	1	1	1	1	1	1	1	1	1	1	1	1	1	1	1	1	1	1	1	1	1	1	1	1	1	1	1	1	1	1	1	1	1	1	1	1	1	1
FliF	1	1	1	1	1	1	1	1	1	1	1	1	1	1	1	1	1	1	1	1	1	1	1	1	1	1	1	1	1	1	1	1	1	1	1	1	1	1	1	1	1	1	1	1	1	1	1	1	1
FlhA	1	1	1	1	1	1	1	1	1	1	1	1	1	1	1	1	1	1	1	1	1	1	1	1	1	1	1	1	1	1	1	1	1	1	1	1	1	1	1	1	1	1	1	1	1	1	1	1	1
LfhA	1	1	1	1	1	1	1	1	1	1	1	1	1	1	1	1	1	1	1	1	1	1	1	1	1	1	1	1	1	1	1	1	1	1	1	1	1	1	1	1	1	1	1	1	1	1	1	1	1
FliN	1	1	1	1	1	1	1	1	1	1	1	1	1	1	1	1	1	1	1	1	1	1	1	1	1	1	1	1	1	1	1	1	1	1	1	1	1	1	1	1	1	1	1	1	1	1	1	1	1
FliI	1	1	1	1	1	1	1	1	1	1	1	1	1	1	1	1	1	1	1	1	1	1	1	1	1	1	1	1	1	1	1	1	1	1	1	1	1	1	1	1	1	1	1	1	1	1	1	1	1
FlhB	1	1	1	1	1	1	1	1	1	1	1	1	1	1	1	1	1	1	1	1	1	1	1	1	1	1	1	1	1	1	1	1	1	1	1	1	1	1	1	1	1	1	1	1	1	1	1	1	1
MotA	1	1	1	1	1	1	1	1	1	1	1	1	1	1	1	1	1	1	1	1	1	1	1	1	1	1	1	1	1	1	1	1	1	1	1	1	1	1	1	1	1	1	1	1	1	1	1	1	1
MotB	1	1	1	1	1	1	1	1	1	1	1	1	1	1	1	1	1	1	1	1	1	1	1	1	1	1	1	1	1	1	1	1	1	1	1	1	1	1	1	1	1	1	1	1	1	1	1	1	1
LafU	1	1	1	1	1	1	1	1	1	1	1	1	1	1	1	1	1	1	1	1	1	1	1	1	1	1	1	1	1	1	1	1	1	1	1	1	1	1	1	1	1	1	1	1	1	1	1	1	1
FlgM	1	1	1	1	1	1	1	1	1	1	1	1	1	1	1	1	1	1	1	1	1	1	1	1	1	1	1	1	1	1	1	1	1	1	1	1	1	1	1	1	1	1	1	1	1	1	1	1	1
FliO	1	1	1	1	1	1	1	1	1	1	1	1	1	1	1	1	1	1	1	1	1	1	1	1	1	1	1	1	1	1	1	1	1	1	1	1	1	1	1	1	1	1	1	1	1	1	1	1	1
FliJ	1	1	1	1	1	1	1	1	1	1	1	1	1	1	1	1	1	1	1	1	1	1	1	1	1	1	1	1	1	1	1	1	1	1	1	1	1	1	1	1	1	1	1	1	1	1	1	1	1
FliH	1	1	1	1	1	1	1	1	1	1	1	1	1	1	1	1	1	1	1	1	1	1	1	1	1	1	1	1	1	1	1	1	1	1	1	1	1	1	1	1	1	1	1	1	1	1	1	1	1
[truncated: 14 more columns]

## Sheet: SD300
	AroH	AroG	AroF	CheZ	FliD	FlgN	YcgR	SstT	PpdD	CpoB	IraD	YhhZ	YafU	Tsr	Tap	Aer	Tar	Trg	CheB	CheR	CheW	CheA	DosC	DgcQ	DgcM	DgcC	DgcZ	DgcT	FliC	FlgL	FliL	FliK	FliS	FlgK	FlgE	FlgG	FlgH	FlgI	FlgA	FlgF	FlgJ	FliM	FlgD	FliG	FliE	FlgB	FlgC	FliP	FliR
AroH	1	1	1	0	0	0	0	0	0	0	0	0	0	0	0	0	0	0	0	0	0	0	0	0	0	0	0	0	0	0	0	0	0	0	0	0	0	0	0	0	0	0	0	0	0	0	0	0	0
AroG	1	1	1	0	0	0	0	0	0	0	0	0	0	0	0	0	0	0	0	0	0	0	0	0	0	0	0	0	0	0	0	0	0	0	0	0	0	0	0	0	0	0	0	0	0	0	0	0	0
AroF	1	1	1	0	0	0	0	0	0	0	0	0	0	0	0	0	0	0	0	0	0	0	0	0	0	0	0	0	0	0	0	0	0	0	0	0	0	0	0	0	0	0	0	0	0	0	0	0	0
CheZ	0	0	0	1	0	0	0	0	0	0	0	0	0	0	0	0	0	0	0	0	0	0	0	0	0	0	0	0	0	0	0	0	0	0	0	0	0	0	0	0	0	0	0	0	0	0	0	0	0
FliD	0	0	0	0	1	0	0	0	0	0	0	0	0	0	0	0	0	0	0	0	0	0	0	0	0	0	0	0	0	0	0	0	0	0	0	0	0	0	0	0	0	0	0	0	0	0	0	0	0
FlgN	0	0	0	0	0	1	0	0	0	0	0	0	0	0	0	0	0	0	0	0	0	0	0	0	0	0	0	0	0	0	0	0	0	0	0	0	0	0	0	0	0	0	0	0	0	0	0	0	0
YcgR	0	0	0	0	0	0	1	0	0	0	0	0	0	0	0	0	0	0	0	0	0	0	0	0	0	0	0	0	0	0	0	0	0	0	0	0	0	0	0	0	0	0	0	0	0	0	0	0	0
SstT	0	0	0	0	0	0	0	1	0	0	0	0	0	0	0	0	0	0	0	0	0	0	0	0	0	0	0	0	0	0	0	0	0	0	0	0	0	0	0	0	0	0	0	0	0	0	0	0	0
PpdD	0	0	0	0	0	0	0	0	1	0	0	0	0	0	0	0	0	0	0	0	0	0	0	0	0	0	0	0	0	0	0	0	0	0	0	0	0	0	0	0	0	0	0	0	0	0	0	0	0
CpoB	0	0	0	0	0	0	0	0	0	1	0	0	0	0	0	0	0	0	0	0	0	0	0	0	0	0	0	0	0	0	0	0	0	0	0	0	0	0	0	0	0	0	0	0	0	0	0	0	0
IraD	0	0	0	0	0	0	0	0	0	0	1	1	0	0	0	0	0	0	0	0	0	0	0	0	0	0	0	0	0	0	0	0	0	0	0	0	0	0	0	0	0	0	0	0	0	0	0	0	0
YhhZ	0	0	0	0	0	0	0	0	0	0	1	1	1	0	0	0	0	0	0	0	0	0	0	0	0	0	0	0	0	0	0	0	0	0	0	0	0	0	0	0	0	0	0	0	0	0	0	0	0
YafU	0	0	0	0	0	0	0	0	0	0	0	1	1	0	0	0	0	0	0	0	0	0	0	0	0	0	0	0	0	0	0	0	0	0	0	0	0	0	0	0	0	0	0	0	0	0	0	0	0
Tsr	0	0	0	0	0	0	0	0	0	0	0	0	0	1	1	1	1	1	0	0	1	0	0	0	0	0	0	0	0	0	0	0	0	0	0	0	0	0	0	0	0	0	0	0	0	0	0	0	0
Tap	0	0	0	0	0	0	0	0	0	0	0	0	0	1	1	1	1	1	0	0	1	0	0	0	0	0	0	0	0	0	0	0	0	0	0	0	0	0	0	0	0	0	0	0	0	0	0	0	0
Aer	0	0	0	0	0	0	0	0	0	0	0	0	0	1	1	1	1	1	0	0	1	0	0	0	0	0	0	0	0	0	0	0	0	0	0	0	0	0	0	0	0	0	0	0	0	0	0	0	0
Tar	0	0	0	0	0	0	0	0	0	0	0	0	0	1	1	1	1	1	0	0	1	0	0	0	0	0	0	0	0	0	0	0	0	0	0	0	0	0	0	0	0	0	0	0	0	0	0	0	0
Trg	0	0	0	0	0	0	0	0	0	0	0	0	0	1	1	1	1	1	0	0	1	0	0	0	0	0	0	0	0	0	0	0	0	0	0	0	0	0	0	0	0	0	0	0	0	0	0	0	0
CheB	0	0	0	0	0	0	0	0	0	0	0	0	0	0	0	0	0	0	1	1	1	1	0	0	0	0	0	0	0	0	0	0	0	0	0	0	0	0	0	0	0	0	0	0	0	0	0	0	0
CheR	0	0	0	0	0	0	0	0	0	0	0	0	0	0	0	0	0	0	1	1	1	1	0	0	0	0	0	0	0	0	0	0	0	0	0	0	0	0	0	0	0	0	0	0	0	0	0	0	0
CheW	0	0	0	0	0	0	0	0	0	0	0	0	0	1	1	1	1	1	1	1	1	1	0	0	0	0	0	0	0	0	0	0	0	0	0	0	0	0	0	0	0	0	0	0	0	0	0	0	0
CheA	0	0	0	0	0	0	0	0	0	0	0	0	0	0	0	0	0	0	1	1	1	1	0	0	0	0	0	0	0	0	0	0	0	0	0	0	0	0	0	0	0	0	0	0	0	0	0	0	0
DosC	0	0	0	0	0	0	0	0	0	0	0	0	0	0	0	0	0	0	0	0	0	0	1	1	1	1	1	1	0	0	0	0	0	0	0	0	0	0	0	0	0	0	0	0	0	0	0	0	0
DgcQ	0	0	0	0	0	0	0	0	0	0	0	0	0	0	0	0	0	0	0	0	0	0	1	1	1	1	1	1	0	0	0	0	0	0	0	0	0	0	0	0	0	0	0	0	0	0	0	0	0
DgcM	0	0	0	0	0	0	0	0	0	0	0	0	0	0	0	0	0	0	0	0	0	0	1	1	1	1	1	1	0	0	0	0	0	0	0	0	0	0	0	0	0	0	0	0	0	0	0	0	0
DgcC	0	0	0	0	0	0	0	0	0	0	0	0	0	0	0	0	0	0	0	0	0	0	1	1	1	1	1	1	0	0	0	0	0	0	0	0	0	0	0	0	0	0	0	0	0	0	0	0	0
DgcZ	0	0	0	0	0	0	0	0	0	0	0	0	0	0	0	0	0	0	0	0	0	0	1	1	1	1	1	1	0	0	0	0	0	0	0	0	0	0	0	0	0	0	0	0	0	0	0	0	0
DgcT	0	0	0	0	0	0	0	0	0	0	0	0	0	0	0	0	0	0	0	0	0	0	1	1	1	1	1	1	0	0	0	0	0	0	0	0	0	0	0	0	0	0	0	0	0	0	0	0	0
FliC	0	0	0	0	0	0	0	0	0	0	0	0	0	0	0	0	0	0	0	0	0	0	0	0	0	0	0	0	1	1	0	0	1	1	0	1	0	1	0	1	0	1	1	1	1	1	1	1	1
FlgL	0	0	0	0	0	0	0	0	0	0	0	0	0	0	0	0	0	0	0	0	0	0	0	0	0	0	0	0	1	1	0	0	1	1	0	1	0	1	0	1	0	1	1	1	1	1	1	1	1
FliL	0	0	0	0	0	0	0	0	0	0	0	0	0	0	0	0	0	0	0	0	0	0	0	0	0	0	0	0	0	0	1	1	0	0	0	0	1	1	0	0	0	1	1	1	1	1	1	1	1
FliK	0	0	0	0	0	0	0	0	0	0	0	0	0	0	0	0	0	0	0	0	0	0	0	0	0	0	0	0	0	0	1	1	0	1	0	0	1	1	0	1	1	1	1	1	1	1	1	1	1
FliS	0	0	0	0	0	0	0	0	0	0	0	0	0	0	0	0	0	0	0	0	0	0	0	0	0	0	0	0	1	1	0	0	1	1	0	0	0	0	0	1	0	1	1	1	1	1	1	1	1
FlgK	0	0	0	0	0	0	0	0	0	0	0	0	0	0	0	0	0	0	0	0	0	0	0	0	0	0	0	0	1	1	0	1	1	1	0	1	1	1	0	1	0	1	1	0	1	1	1	1	1
FlgE	0	0	0	0	0	0	0	0	0	0	0	0	0	0	0	0	0	0	0	0	0	0	0	0	0	0	0	0	0	0	0	0	0	0	1	0	0	1	0	0	0	0	1	0	0	1	0	1	0
FlgG	0	0	0	0	0	0	0	0	0	0	0	0	0	0	0	0	0	0	0	0	0	0	0	0	0	0	0	0	1	1	0	0	0	1	0	1	1	1	0	0	0	1	1	1	1	1	1	1	1
FlgH	0	0	0	0	0	0	0	0	0	0	0	0	0	0	0	0	0	0	0	0	0	0	0	0	0	0	0	0	0	0	1	1	0	1	0	1	1	1	1	1	1	1	1	1	1	1	1	1	1
FlgI	0	0	0	0	0	0	0	0	0	0	0	0	0	0	0	0	0	0	0	0	0	0	0	0	0	0	0	0	1	1	1	1	0	1	1	1	1	1	1	1	1	1	1	1	1	1	1	1	1
FlgA	0	0	0	0	0	0	0	0	0	0	0	0	0	0	0	0	0	0	0	0	0	0	0	0	0	0	0	0	0	0	0	0	0	0	0	0	1	1	1	1	0	0	0	0	1	1	1	1	1
FlgF	0	0	0	0	0	0	0	0	0	0	0	0	0	0	0	0	0	0	0	0	0	0	0	0	0	0	0	0	1	1	0	1	1	1	0	0	1	1	1	1	1	1	1	1	1	1	1	1	1
FlgJ	0	0	0	0	0	0	0	0	0	0	0	0	0	0	0	0	0	0	0	0	0	0	0	0	0	0	0	0	0	0	0	1	0	0	0	0	1	1	0	1	1	0	0	0	1	0	0	0	0
FliM	0	0	0	0	0	0	0	0	0	0	0	0	0	0	0	0	0	0	0	0	0	0	0	0	0	0	0	0	1	1	1	1	1	1	0	1	1	1	0	1	0	1	1	1	1	1	1	1	1
FlgD	0	0	0	0	0	0	0	0	0	0	0	0	0	0	0	0	0	0	0	0	0	0	0	0	0	0	0	0	1	1	1	1	1	1	1	1	1	1	0	1	0	1	1	1	1	1	1	1	1
FliG	0	0	0	0	0	0	0	0	0	0	0	0	0	0	0	0	0	0	0	0	0	0	0	0	0	0	0	0	1	1	1	1	1	0	0	1	1	1	0	1	0	1	1	1	1	1	1	1	1
FliE	0	0	0	0	0	0	0	0	0	0	0	0	0	0	0	0	0	0	0	0	0	0	0	0	0	0	0	0	1	1	1	1	1	1	0	1	1	1	1	1	1	1	1	1	1	1	1	1	1
FlgB	0	0	0	0	0	0	0	0	0	0	0	0	0	0	0	0	0	0	0	0	0	0	0	0	0	0	0	0	1	1	1	1	1	1	1	1	1	1	1	1	0	1	1	1	1	1	1	1	1
FlgC	0	0	0	0	0	0	0	0	0	0	0	0	0	0	0	0	0	0	0	0	0	0	0	0	0	0	0	0	1	1	1	1	1	1	0	1	1	1	1	1	0	1	1	1	1	1	1	1	1
FliP	0	0	0	0	0	0	0	0	0	0	0	0	0	0	0	0	0	0	0	0	0	0	0	0	0	0	0	0	1	1	1	1	1	1	1	1	1	1	1	1	0	1	1	1	1	1	1	1	1
FliR	0	0	0	0	0	0	0	0	0	0	0	0	0	0	0	0	0	0	0	0	0	0	0	0	0	0	0	0	1	1	1	1	1	1	0	1	1	1	1	1	0	1	1	1	1	1	1	1	1
FliQ	0	0	0	0	0	0	0	0	0	0	0	0	0	0	0	0	0	0	0	0	0	0	0	0	0	0	0	0	1	1	1	1	1	1	0	1	1	1	1	1	0	1	1	1	1	1	1	1	1
FliF	0	0	0	0	0	0	0	0	0	0	0	0	0	0	0	0	0	0	0	0	0	0	0	0	0	0	0	0	1	1	1	1	1	1	1	1	1	1	1	1	1	1	1	1	1	1	1	1	1
FlhA	0	0	0	0	0	0	0	0	0	0	0	0	0	0	0	0	0	0	0	0	0	0	0	0	0	0	0	0	1	1	1	1	1	1	1	1	1	1	1	1	1	1	1	1	1	1	1	1	1
LfhA	0	0	0	0	0	0	0	0	0	0	0	0	0	0	0	0	0	0	0	0	0	0	0	0	0	0	0	0	1	1	1	1	1	1	1	1	1	1	1	1	1	1	1	1	1	1	1	1	1
FliN	0	0	0	0	0	0	0	0	0	0	0	0	0	0	0	0	0	0	0	0	0	0	0	0	0	0	0	0	0	0	0	0	0	0	0	0	0	1	0	0	0	1	1	0	1	1	1	1	1
FliI	0	0	0	0	0	0	0	0	0	0	0	0	0	0	0	0	0	0	0	0	0	0	0	0	0	0	0	0	0	0	0	0	0	0	0	0	0	1	0	0	0	1	1	0	1	1	1	1	1
FlhB	0	0	0	0	0	0	0	0	0	0	0	0	0	0	0	0	0	0	0	0	0	0	0	0	0	0	0	0	1	1	0	0	1	1	0	1	1	1	0	1	0	1	1	1	1	1	1	1	1
MotA	0	0	0	0	0	0	0	0	0	0	0	0	0	0	0	0	0	0	0	0	0	0	0	0	0	0	0	0	1	1	0	0	0	0	0	0	0	1	0	1	0	1	1	1	1	1	1	1	1
MotB	0	0	0	0	0	0	0	0	0	0	0	0	0	0	0	0	0	0	0	0	0	0	0	0	0	0	0	0	0	0	0	0	0	0	0	0	0	0	0	0	0	0	0	0	0	0	0	0	0
LafU	0	0	0	0	0	0	0	0	0	0	0	0	0	0	0	0	0	0	0	0	0	0	0	0	0	0	0	0	0	0	0	0	0	0	0	0	0	0	0	0	0	0	0	0	0	0	0	0	0
FlgM	0	0	0	0	0	0	0	0	0	0	0	0	0	0	0	0	0	0	0	0	0	0	0	0	0	0	0	0	0	0	0	0	0	0	0	0	0	0	0	1	0	0	0	0	0	0	0	0	0
FliO	0	0	0	0	0	0	0	0	0	0	0	0	0	0	0	0	0	0	0	0	0	0	0	0	0	0	0	0	0	0	0	0	1	0	0	0	0	0	0	0	0	0	0	0	0	0	0	0	0
FliJ	0	0	0	0	0	0	0	0	0	0	0	0	0	0	0	0	0	0	0	0	0	0	0	0	0	0	0	0	0	0	0	1	0	0	0	0	0	0	0	0	0	0	0	0	0	0	0	0	0
FliH	0	0	0	0	0	0	0	0	0	0	0	0	0	0	0	0	0	0	0	0	0	0	0	0	0	0	0	0	0	0	0	0	0	0	0	0	0	0	0	0	0	0	0	0	1	0	0	1	0
[truncated: 14 more columns]

## Sheet: SD1000
	AroH	AroG	AroF	CheZ	FliD	FlgN	YcgR	SstT	PpdD	CpoB	IraD	YhhZ	YafU	Tsr	Tap	Aer	Tar	Trg	CheB	CheR	CheW	CheA	DosC	DgcQ	DgcM	DgcC	DgcZ	DgcT	FliC	FlgL	FliL	FliK	FliS	FlgK	FlgE	FlgG	FlgH	FlgI	FlgA	FlgF	FlgJ	FliM	FlgD	FliG	FliE	FlgB	FlgC	FliP	FliR
AroH	1	1	1	0	0	0	0	0	0	0	0	0	0	0	0	0	0	0	0	0	0	0	0	0	0	0	0	0	0	0	0	0	0	0	0	0	0	0	0	0	0	0	0	0	0	0	0	0	0
AroG	1	1	1	0	0	0	0	0	0	0	0	0	0	0	0	0	0	0	0	0	0	0	0	0	0	0	0	0	0	0	0	0	0	0	0	0	0	0	0	0	0	0	0	0	0	0	0	0	0
AroF	1	1	1	0	0	0	0	0	0	0	0	0	0	0	0	0	0	0	0	0	0	0	0	0	0	0	0	0	0	0	0	0	0	0	0	0	0	0	0	0	0	0	0	0	0	0	0	0	0
CheZ	0	0	0	1	0	0	0	0	0	0	0	0	0	0	0	0	0	0	0	0	0	0	0	0	0	0	0	0	0	0	0	0	0	0	0	0	0	0	0	0	0	0	0	0	0	0	0	0	0
FliD	0	0	0	0	1	0	0	0	0	0	0	0	0	0	0	0	0	0	0	0	0	0	0	0	0	0	0	0	0	0	0	0	0	0	0	0	0	0	0	0	0	0	0	0	0	0	0	0	0
FlgN	0	0	0	0	0	1	0	0	0	0	0	0	0	0	0	0	0	0	0	0	0	0	0	0	0	0	0	0	0	0	0	0	0	0	0	0	0	0	0	0	0	0	0	0	0	0	0	0	0
YcgR	0	0	0	0	0	0	1	0	0	0	0	0	0	0	0	0	0	0	0	0	0	0	0	0	0	0	0	0	0	0	0	0	0	0	0	0	0	0	0	0	0	0	0	0	0	0	0	0	0
SstT	0	0	0	0	0	0	0	1	0	0	0	0	0	0	0	0	0	0	0	0	0	0	0	0	0	0	0	0	0	0	0	0	0	0	0	0	0	0	0	0	0	0	0	0	0	0	0	0	0
PpdD	0	0	0	0	0	0	0	0	1	0	0	0	0	0	0	0	0	0	0	0	0	0	0	0	0	0	0	0	0	0	0	0	0	0	0	0	0	0	0	0	0	0	0	0	0	0	0	0	0
CpoB	0	0	0	0	0	0	0	0	0	1	0	0	0	0	0	0	0	0	0	0	0	0	0	0	0	0	0	0	0	0	0	0	0	0	0	0	0	0	0	0	0	0	0	0	0	0	0	0	0
IraD	0	0	0	0	0	0	0	0	0	0	1	0	0	0	0	0	0	0	0	0	0	0	0	0	0	0	0	0	0	0	0	0	0	0	0	0	0	0	0	0	0	0	0	0	0	0	0	0	0
YhhZ	0	0	0	0	0	0	0	0	0	0	0	1	0	0	0	0	0	0	0	0	0	0	0	0	0	0	0	0	0	0	0	0	0	0	0	0	0	0	0	0	0	0	0	0	0	0	0	0	0
YafU	0	0	0	0	0	0	0	0	0	0	0	0	1	0	0	0	0	0	0	0	0	0	0	0	0	0	0	0	0	0	0	0	0	0	0	0	0	0	0	0	0	0	0	0	0	0	0	0	0
Tsr	0	0	0	0	0	0	0	0	0	0	0	0	0	1	1	1	1	1	0	0	0	0	0	0	0	0	0	0	0	0	0	0	0	0	0	0	0	0	0	0	0	0	0	0	0	0	0	0	0
Tap	0	0	0	0	0	0	0	0	0	0	0	0	0	1	1	1	1	1	0	0	0	0	0	0	0	0	0	0	0	0	0	0	0	0	0	0	0	0	0	0	0	0	0	0	0	0	0	0	0
Aer	0	0	0	0	0	0	0	0	0	0	0	0	0	1	1	1	1	1	0	0	0	0	0	0	0	0	0	0	0	0	0	0	0	0	0	0	0	0	0	0	0	0	0	0	0	0	0	0	0
Tar	0	0	0	0	0	0	0	0	0	0	0	0	0	1	1	1	1	1	0	0	0	0	0	0	0	0	0	0	0	0	0	0	0	0	0	0	0	0	0	0	0	0	0	0	0	0	0	0	0
Trg	0	0	0	0	0	0	0	0	0	0	0	0	0	1	1	1	1	1	0	0	0	0	0	0	0	0	0	0	0	0	0	0	0	0	0	0	0	0	0	0	0	0	0	0	0	0	0	0	0
CheB	0	0	0	0	0	0	0	0	0	0	0	0	0	0	0	0	0	0	1	1	1	0	0	0	0	0	0	0	0	0	0	0	0	0	0	0	0	0	0	0	0	0	0	0	0	0	0	0	0
CheR	0	0	0	0	0	0	0	0	0	0	0	0	0	0	0	0	0	0	1	1	1	0	0	0	0	0	0	0	0	0	0	0	0	0	0	0	0	0	0	0	0	0	0	0	0	0	0	0	0
CheW	0	0	0	0	0	0	0	0	0	0	0	0	0	0	0	0	0	0	1	1	1	0	0	0	0	0	0	0	0	0	0	0	0	0	0	0	0	0	0	0	0	0	0	0	0	0	0	0	0
CheA	0	0	0	0	0	0	0	0	0	0	0	0	0	0	0	0	0	0	0	0	0	1	0	0	0	0	0	0	0	0	0	0	0	0	0	0	0	0	0	0	0	0	0	0	0	0	0	0	0
DosC	0	0	0	0	0	0	0	0	0	0	0	0	0	0	0	0	0	0	0	0	0	0	1	1	1	1	1	1	0	0	0	0	0	0	0	0	0	0	0	0	0	0	0	0	0	0	0	0	0
DgcQ	0	0	0	0	0	0	0	0	0	0	0	0	0	0	0	0	0	0	0	0	0	0	1	1	1	1	1	1	0	0	0	0	0	0	0	0	0	0	0	0	0	0	0	0	0	0	0	0	0
DgcM	0	0	0	0	0	0	0	0	0	0	0	0	0	0	0	0	0	0	0	0	0	0	1	1	1	1	1	1	0	0	0	0	0	0	0	0	0	0	0	0	0	0	0	0	0	0	0	0	0
DgcC	0	0	0	0	0	0	0	0	0	0	0	0	0	0	0	0	0	0	0	0	0	0	1	1	1	1	1	1	0	0	0	0	0	0	0	0	0	0	0	0	0	0	0	0	0	0	0	0	0
DgcZ	0	0	0	0	0	0	0	0	0	0	0	0	0	0	0	0	0	0	0	0	0	0	1	1	1	1	1	1	0	0	0	0	0	0	0	0	0	0	0	0	0	0	0	0	0	0	0	0	0
DgcT	0	0	0	0	0	0	0	0	0	0	0	0	0	0	0	0	0	0	0	0	0	0	1	1	1	1	1	1	0	0	0	0	0	0	0	0	0	0	0	0	0	0	0	0	0	0	0	0	0
FliC	0	0	0	0	0	0	0	0	0	0	0	0	0	0	0	0	0	0	0	0	0	0	0	0	0	0	0	0	1	1	0	0	0	0	0	0	0	0	0	0	0	0	0	0	0	0	0	0	0
FlgL	0	0	0	0	0	0	0	0	0	0	0	0	0	0	0	0	0	0	0	0	0	0	0	0	0	0	0	0	1	1	0	0	0	0	0	0	0	0	0	0	0	0	0	0	0	0	0	0	0
FliL	0	0	0	0	0	0	0	0	0	0	0	0	0	0	0	0	0	0	0	0	0	0	0	0	0	0	0	0	0	0	1	0	0	0	0	0	0	0	0	0	0	0	0	0	0	0	0	0	0
FliK	0	0	0	0	0	0	0	0	0	0	0	0	0	0	0	0	0	0	0	0	0	0	0	0	0	0	0	0	0	0	0	1	0	0	0	0	0	0	0	0	0	0	0	0	0	0	0	0	0
FliS	0	0	0	0	0	0	0	0	0	0	0	0	0	0	0	0	0	0	0	0	0	0	0	0	0	0	0	0	0	0	0	0	1	0	0	0	0	0	0	0	0	0	0	0	0	0	0	0	0
FlgK	0	0	0	0	0	0	0	0	0	0	0	0	0	0	0	0	0	0	0	0	0	0	0	0	0	0	0	0	0	0	0	0	0	1	0	0	0	0	0	0	0	0	0	0	0	0	0	0	0
FlgE	0	0	0	0	0	0	0	0	0	0	0	0	0	0	0	0	0	0	0	0	0	0	0	0	0	0	0	0	0	0	0	0	0	0	1	0	0	0	0	0	0	0	0	0	0	0	0	0	0
FlgG	0	0	0	0	0	0	0	0	0	0	0	0	0	0	0	0	0	0	0	0	0	0	0	0	0	0	0	0	0	0	0	0	0	0	0	1	0	0	0	0	0	0	0	0	0	0	0	0	0
FlgH	0	0	0	0	0	0	0	0	0	0	0	0	0	0	0	0	0	0	0	0	0	0	0	0	0	0	0	0	0	0	0	0	0	0	0	0	1	1	0	0	0	0	0	0	0	0	0	0	0
FlgI	0	0	0	0	0	0	0	0	0	0	0	0	0	0	0	0	0	0	0	0	0	0	0	0	0	0	0	0	0	0	0	0	0	0	0	0	1	1	0	0	0	0	0	0	0	0	0	0	0
FlgA	0	0	0	0	0	0	0	0	0	0	0	0	0	0	0	0	0	0	0	0	0	0	0	0	0	0	0	0	0	0	0	0	0	0	0	0	0	0	1	0	0	0	0	0	0	0	0	0	0
FlgF	0	0	0	0	0	0	0	0	0	0	0	0	0	0	0	0	0	0	0	0	0	0	0	0	0	0	0	0	0	0	0	0	0	0	0	0	0	0	0	1	1	0	0	0	0	0	0	0	0
FlgJ	0	0	0	0	0	0	0	0	0	0	0	0	0	0	0	0	0	0	0	0	0	0	0	0	0	0	0	0	0	0	0	0	0	0	0	0	0	0	0	1	1	0	0	0	0	0	0	0	0
FliM	0	0	0	0	0	0	0	0	0	0	0	0	0	0	0	0	0	0	0	0	0	0	0	0	0	0	0	0	0	0	0	0	0	0	0	0	0	0	0	0	0	1	0	0	0	0	0	0	0
FlgD	0	0	0	0	0	0	0	0	0	0	0	0	0	0	0	0	0	0	0	0	0	0	0	0	0	0	0	0	0	0	0	0	0	0	0	0	0	0	0	0	0	0	1	0	0	0	1	0	0
FliG	0	0	0	0	0	0	0	0	0	0	0	0	0	0	0	0	0	0	0	0	0	0	0	0	0	0	0	0	0	0	0	0	0	0	0	0	0	0	0	0	0	0	0	1	0	0	0	0	0
FliE	0	0	0	0	0	0	0	0	0	0	0	0	0	0	0	0	0	0	0	0	0	0	0	0	0	0	0	0	0	0	0	0	0	0	0	0	0	0	0	0	0	0	0	0	1	1	1	1	1
FlgB	0	0	0	0	0	0	0	0	0	0	0	0	0	0	0	0	0	0	0	0	0	0	0	0	0	0	0	0	0	0	0	0	0	0	0	0	0	0	0	0	0	0	0	0	1	1	1	1	1
FlgC	0	0	0	0	0	0	0	0	0	0	0	0	0	0	0	0	0	0	0	0	0	0	0	0	0	0	0	0	0	0	0	0	0	0	0	0	0	0	0	0	0	0	1	0	1	1	1	1	1
FliP	0	0	0	0	0	0	0	0	0	0	0	0	0	0	0	0	0	0	0	0	0	0	0	0	0	0	0	0	0	0	0	0	0	0	0	0	0	0	0	0	0	0	0	0	1	1	1	1	1
FliR	0	0	0	0	0	0	0	0	0	0	0	0	0	0	0	0	0	0	0	0	0	0	0	0	0	0	0	0	0	0	0	0	0	0	0	0	0	0	0	0	0	0	0	0	1	1	1	1	1
FliQ	0	0	0	0	0	0	0	0	0	0	0	0	0	0	0	0	0	0	0	0	0	0	0	0	0	0	0	0	0	0	0	0	0	0	0	0	0	0	0	0	0	1	0	0	1	1	1	1	1
FliF	0	0	0	0	0	0	0	0	0	0	0	0	0	0	0	0	0	0	0	0	0	0	0	0	0	0	0	0	0	0	0	0	0	0	0	0	0	0	0	0	0	0	0	0	0	0	0	0	0
FlhA	0	0	0	0	0	0	0	0	0	0	0	0	0	0	0	0	0	0	0	0	0	0	0	0	0	0	0	0	0	0	0	0	0	0	0	0	0	0	0	0	0	0	0	0	0	0	0	0	0
LfhA	0	0	0	0	0	0	0	0	0	0	0	0	0	0	0	0	0	0	0	0	0	0	0	0	0	0	0	0	0	0	0	0	0	0	0	0	0	0	0	0	0	0	0	0	0	0	0	0	0
FliN	0	0	0	0	0	0	0	0	0	0	0	0	0	0	0	0	0	0	0	0	0	0	0	0	0	0	0	0	0	0	0	0	0	0	0	0	0	0	0	0	0	0	0	0	0	0	0	0	0
FliI	0	0	0	0	0	0	0	0	0	0	0	0	0	0	0	0	0	0	0	0	0	0	0	0	0	0	0	0	0	0	0	0	0	0	0	0	0	0	0	0	0	0	0	0	0	0	0	0	1
FlhB	0	0	0	0	0	0	0	0	0	0	0	0	0	0	0	0	0	0	0	0	0	0	0	0	0	0	0	0	0	0	0	0	0	0	0	0	0	0	0	0	0	0	0	0	0	0	0	0	0
MotA	0	0	0	0	0	0	0	0	0	0	0	0	0	0	0	0	0	0	0	0	0	0	0	0	0	0	0	0	0	0	0	0	0	0	0	0	0	0	0	0	0	0	0	0	0	0	0	0	0
MotB	0	0	0	0	0	0	0	0	0	0	0	0	0	0	0	0	0	0	0	0	0	0	0	0	0	0	0	0	0	0	0	0	0	0	0	0	0	0	0	0	0	0	0	0	0	0	0	0	0
LafU	0	0	0	0	0	0	0	0	0	0	0	0	0	0	0	0	0	0	0	0	0	0	0	0	0	0	0	0	0	0	0	0	0	0	0	0	0	0	0	0	0	0	0	0	0	0	0	0	0
FlgM	0	0	0	0	0	0	0	0	0	0	0	0	0	0	0	0	0	0	0	0	0	0	0	0	0	0	0	0	0	0	0	0	0	0	0	0	0	0	0	0	0	0	0	0	0	0	0	0	0
FliO	0	0	0	0	0	0	0	0	0	0	0	0	0	0	0	0	0	0	0	0	0	0	0	0	0	0	0	0	0	0	0	0	0	0	0	0	0	0	0	0	0	0	0	0	0	0	0	0	0
FliJ	0	0	0	0	0	0	0	0	0	0	0	0	0	0	0	0	0	0	0	0	0	0	0	0	0	0	0	0	0	0	0	0	0	0	0	0	0	0	0	0	0	0	0	0	0	0	0	0	0
FliH	0	0	0	0	0	0	0	0	0	0	0	0	0	0	0	0	0	0	0	0	0	0	0	0	0	0	0	0	0	0	0	0	0	0	0	0	0	0	0	0	0	0	0	0	0	0	0	0	0
[truncated: 14 more columns]

## Sheet: DAVID_Output_SD50
Spectral Depth 50; Directed Motility Module
Category	Term	Count	%	PValue	Genes	List Total	Pop Hits	Pop Total	Fold Enrichment	Bonferroni	Benjamini	FDR
KEGG_PATHWAY	eco02040:Flagellar assembly	33	55	9.16122e-52	P06974, P0AC05, P0ABW9, P75933, P33135, P52614, P52612, P75937, P52613, P75936, P0AF06, P0AEM4, P33235, P0AC07, P75938, P0ABX5, P24216, P15070, P0ABX2, P0A8T5, P0ABZ1, P43533, P29744, P76298, P76299, P04949, P31068, P0A6S3, P0A6S0, P26608, P22586, P09348, P25798	46	36	1564	31.1667	7.32898e-51	7.32898e-51	7.32898e-51
UP_KEYWORDS	Bacterial flagellum	20	33.3333	6.67003e-36	P06974, P76010, P0ABW9, P33135, P04949, P75937, P33235, P0AC07, P0A6S3, P75938, P0A6S0, P0ABX5, P22586, P24216, P15070, P0ABX2, P0A8T5, P0ABZ1, P25798, P29744	60	20	4139	68.9833	4.06872e-34	4.06872e-34	3.46842e-34
GOTERM_BP_DIRECT	GO:0071973~bacterial-type flagellum-dependent cell motility	22	36.6667	2.24975e-32	P06974, P76010, P75933, P04949, P75942, P52614, P52612, P31068, P52613, P33235, P0A6S3, P75938, P0A6S0, P26608, P0ABX5, P24216, P15070, P09348, P0A8T5, P0ABZ1, P25798, P29744	58	30	3277	41.4333	1.34985e-30	1.34985e-30	1.25986e-30
UP_KEYWORDS	Chemotaxis	18	30	8.31149e-29	P06974, P07018, P0ABX8, P05704, P50466, P0AF06, P52613, P0A9H9, P0A964, P07363, P22586, P07330, P15070, P02942, P07364, P09348, P07017, P0ABZ1	60	22	4139	56.4409	5.07001e-27	2.53501e-27	2.16099e-27
GOTERM_BP_DIRECT	GO:0006935~chemotaxis	16	26.6667	8.59524e-23	P07018, P0ABX8, P05704, P0AF06, P52613, P0A9H9, P0A964, P07363, P22586, P07330, P15070, P02942, P07364, P09348, P07017, P0ABZ1	58	22	3277	41.0909	5.15715e-21	2.57857e-21	2.40667e-21
UP_KEYWORDS	Bacterial flagellum biogenesis	13	21.6667	1.25953e-19	P0AC05, P76298, P76299, P75933, P75942, P52614, P52612, P0AEM4, P31068, P52613, P75936, P26608, P43533	60	17	4139	52.752	7.68315e-18	2.56105e-18	2.18319e-18
GOTERM_CC_DIRECT	GO:0009425~bacterial-type flagellum basal body	12	20	3.23309e-19	P0AC05, P06974, P75938, P76010, P0ABX8, P22586, P33135, P15070, P75937, P0A8T5, P0ABZ1, P0AC07	55	12	2941	53.4727	7.43611e-18	7.43611e-18	6.78949e-18
KEGG_PATHWAY	eco02030:Bacterial chemotaxis	15	25	1.01035e-18	P06974, P07018, P05704, P50466, P0AF06, P0A9H9, P0A964, P07363, P07330, P15070, P02942, P07364, P09348, P07017, P0ABZ1	46	20	1564	25.5	8.0828e-18	4.0414e-18	4.0414e-18
GOTERM_CC_DIRECT	GO:0009424~bacterial-type flagellum hook	10	16.6667	1.16857e-15	P75938, P0ABW9, P0ABX5, P24216, P52614, P75937, P0ABX2, P75936, P33235, P29744	55	10	2941	53.4727	2.80886e-14	1.34386e-14	1.227e-14
GOTERM_BP_DIRECT	GO:0044780~bacterial-type flagellum assembly	11	18.3333	3.10707e-15	P76298, P26608, P76299, P33135, P75942, P52614, P52612, P43533, P0ABZ1, P33235, P0AC07	58	15	3277	41.4333	1.86517e-13	6.21414e-14	5.79986e-14
GOTERM_MF_DIRECT	GO:0003774~motor activity	8	13.3333	2.25063e-13	P06974, P0A6S0, P15070, P31068, P52613, P0A8T5, P0ABZ1, P25798	41	8	3186	77.7073	7.20135e-12	7.20203e-12	6.07671e-12
UP_KEYWORDS	Flagellar rotation	8	13.3333	2.92415e-12	P06974, P0ABX8, P22586, P15070, P09348, P0AF06, P0ABZ1, P0A9H9	60	9	4139	61.3185	1.7837e-10	4.45933e-11	3.8014e-11
GOTERM_BP_DIRECT	GO:0071978~bacterial-type flagellum-dependent swarming motility	8	13.3333	5.23037e-10	P75938, P0ABW9, P0ABX8, P0ABX5, P09348, P75937, P0ABX2, P75936	58	13	3277	34.7692	3.13822e-08	7.84556e-09	7.32252e-09
UP_KEYWORDS	Bacterial flagellum protein export	6	10	2.94223e-09	P0AC05, P76298, P76299, P52612, P31068, P52613	60	6	4139	68.9833	1.79476e-07	3.58952e-08	3.05991e-08
INTERPRO	IPR001444:Flagellar basal body rod protein, N-terminal	6	10	3.68722e-09	P75938, P0ABW9, P0ABX5, P75937, P0ABX2, P33235	60	6	3956	65.9333	4.31404e-07	4.31405e-07	4.01907e-07
GOTERM_BP_DIRECT	GO:0044781~bacterial-type flagellum organization	7	11.6667	4.21771e-09	P0AC05, P75933, P22586, P0AEM4, P31068, P52613, P75936	58	10	3277	39.55	2.53062e-07	5.06125e-08	4.72383e-08
GOTERM_MF_DIRECT	GO:0052621~diguanylate cyclase activity	6	10	5.80692e-08	P75908, P77302, P31129, P76330, P0AAP1, P0AA89	41	10	3186	46.6244	1.85821e-06	9.29107e-07	7.83934e-07
UP_SEQ_FEATURE	domain:Methyl-accepting transducer	5	8.33333	1.82965e-07	P07018, P05704, P02942, P50466, P07017	60	5	4147	69.1167	1.55519e-05	1.5735e-05	1.5735e-05
UP_KEYWORDS	Transducer	5	8.33333	1.8438e-07	P07018, P05704, P02942, P50466, P07017	60	5	4139	68.9833	1.12471e-05	1.87453e-06	1.59796e-06
INTERPRO	IPR004090:Chemotaxis methyl-accepting receptor	5	8.33333	2.20843e-07	P07018, P05704, P02942, P50466, P07017	60	5	3956	65.9333	2.58383e-05	5.16773e-06	4.81438e-06
INTERPRO	IPR004089:Methyl-accepting chemotaxis protein (MCP) signalling domain	5	8.33333	2.20843e-07	P07018, P05704, P02942, P50466, P07017	60	5	3956	65.9333	2.58383e-05	5.16773e-06	4.81438e-06
INTERPRO	IPR010930:Flagellar basal-body/hook protein, C-terminal domain	5	8.33333	2.20843e-07	P75938, P0ABX5, P75937, P0ABX2, P33235	60	5	3956	65.9333	2.58383e-05	5.16773e-06	4.81438e-06
INTERPRO	IPR019776:Flagellar basal body rod protein, conserved site	5	8.33333	2.20843e-07	P75938, P0ABW9, P0ABX5, P75937, P0ABX2	60	5	3956	65.9333	2.58383e-05	5.16773e-06	4.81438e-06
SMART	SM00283:MA	5	8.33333	7.21743e-07	P07018, P05704, P02942, P50466, P07017	18	5	792	44	1.08261e-05	1.08261e-05	1.08261e-05
UP_SEQ_FEATURE	domain:GGDEF	6	10	2.66525e-06	P75908, P77302, P31129, P76330, P0AAP1, P0AA89	60	17	4147	24.3941	0.000226521	0.000114606	0.000114606
INTERPRO	IPR000160:GGDEF domain	6	10	6.15791e-06	P75908, P77302, P31129, P76330, P0AAP1, P0AA89	60	19	3956	20.8211	0.000720219	0.000120079	0.000111869
GOTERM_MF_DIRECT	GO:0004888~transmembrane signaling receptor activity	4	6.66667	7.27507e-06	P07018, P05704, P02942, P07017	41	4	3186	77.7073	0.000232776	7.76007e-05	6.54756e-05
INTERPRO	IPR004091:Chemotaxis methyl-accepting receptor, methyl-accepting site	4	6.66667	1.24778e-05	P07018, P05704, P02942, P07017	60	4	3956	65.9333	0.00145884	0.000182487	0.000170009
INTERPRO	IPR003122:Chemotaxis methyl-accepting receptor, ligand-binding	4	6.66667	1.24778e-05	P07018, P05704, P02942, P07017	60	4	3956	65.9333	0.00145884	0.000182487	0.000170009
UP_KEYWORDS	Methylation	6	10	2.11667e-05	P07018, P05704, P02942, P50466, P36647, P07017	60	25	4139	16.556	0.00129035	0.000184453	0.000157238
SMART	SM00267:DUF1	6	10	2.34416e-05	P75908, P77302, P31129, P76330, P0AAP1, P0AA89	18	19	792	13.8947	0.000351567	0.000162683	0.000162683
GOTERM_MF_DIRECT	GO:0005198~structural molecule activity	5	8.33333	2.63432e-05	P0A6S3, P04949, P0A8T5, P33235, P29744	41	15	3186	25.9024	0.00084264	0.000210746	0.000177817
SMART	SM00319:TarH	4	6.66667	3.25367e-05	P07018, P05704, P02942, P07017	18	4	792	44	0.000487939	0.000162683	0.000162683
GOTERM_BP_DIRECT	GO:0007165~signal transduction	4	6.66667	4.87063e-05	P0A964, P05704, P02942, P50466	58	5	3277	45.2	0.00291819	0.000487063	0.000454593
GOTERM_MF_DIRECT	GO:0004871~signal transducer activity	4	6.66667	0.000146238	P0A964, P07018, P50466, P07017	41	9	3186	34.5366	0.00466904	0.000935926	0.000789687
INTERPRO	IPR003660:HAMP linker domain	5	8.33333	0.000267219	P07018, P05704, P02942, P50466, P07017	60	22	3956	14.9848	0.030785	0.00347385	0.00323632
UP_KEYWORDS	Secreted	4	6.66667	0.000307597	P24216, P04949, P33235, P29744	60	10	4139	27.5933	0.0185913	0.00234543	0.00199938
GOTERM_MF_DIRECT	GO:0005525~GTP binding	6	10	0.000445033	P75908, P77302, P31129, P76330, P0AAP1, P0AA89	41	53	3186	8.79705	0.0141432	0.00209157	0.00176477
GOTERM_MF_DIRECT	GO:0003849~3-deoxy-7-phosphoheptulonate synthase activity	3	5	0.000457532	P00888, P00887, P0AB91	41	3	3186	77.7073	0.0145377	0.00209157	0.00176477
UP_KEYWORDS	GTP-binding	6	10	0.000530867	P75908, P77302, P31129, P76330, P0AAP1, P0AA89	60	48	4139	8.62292	0.0318725	0.0035981	0.00306723
INTERPRO	IPR006219:DHAP synthase, class 1	3	5	0.000649837	P00888, P00887, P0AB91	60	3	3956	65.9333	0.0732354	0.0069119	0.00643929
INTERPRO	IPR020013:Fagellar hook-basal body protein, FlgE/F/G	3	5	0.000649837	P75938, P0ABX5, P75937	60	3	3956	65.9333	0.0732354	0.0069119	0.00643929
PIR_SUPERFAMILY	PIRSF001361:3-deoxy-7-phosphoheptulonate synthase	3	5	0.000779259	P00888, P00887, P0AB91	13	3	710	54.6154	0.00853853	0.00857185	0.00857185
INTERPRO	IPR006218:DAHP synthetase I/KDSA	3	5	0.0012872	P00888, P00887, P0AB91	60	4	3956	49.45	0.139893	0.0125502	0.011692
GOTERM_BP_DIRECT	GO:0009306~protein secretion	4	6.66667	0.00158566	P0AC05, P76298, P76299, P0AC07	58	14	3277	16.1429	0.0908229	0.0135914	0.0126853
GOTERM_CC_DIRECT	GO:0009288~bacterial-type flagellum	3	5	0.00193945	P31068, P52613, P0A9H9	55	4	2941	40.1045	0.0436685	0.0148691	0.0135762
UP_SEQ_FEATURE	domain:HAMP	4	6.66667	0.00225461	P07018, P05704, P02942, P07017	60	19	4147	14.5509	0.174576	0.0646323	0.0646323
UP_KEYWORDS	Protein transport	6	10	0.00277335	P0AC05, P76298, P76299, P52612, P31068, P52613	60	69	4139	5.99855	0.155837	0.0169175	0.0144214
SMART	SM00304:HAMP	4	6.66667	0.00387827	P07018, P05704, P02942, P07017	18	16	792	11	0.056621	0.0145435	0.0145435
GOTERM_CC_DIRECT	GO:0005576~extracellular region	4	6.66667	0.00392942	P24216, P04949, P33235, P29744	55	18	2941	11.8828	0.0865755	0.0225941	0.0206294
KEGG_PATHWAY	eco02020:Two-component system	11	18.3333	0.00670544	P0A964, P07018, P05704, P07330, P07363, P04949, P02942, P07364, P09348, P50466, P07017	46	146	1564	2.56164	0.0524013	0.0178812	0.0178812
GOTERM_MF_DIRECT	GO:0005515~protein binding	17	28.3333	0.00874476	P06974, P76010, P0AA89, P05704, P0AEM4, P33235, P0A9H9, P0A964, P39375, P07363, P24216, P00887, P15070, P43533, P07017, P0ABZ1, P25798	41	712	3186	1.85537	0.245019	0.034979	0.0295136
GOTERM_BP_DIRECT	GO:0009423~chorismate biosynthetic process	3	5	0.0147846	P00888, P00887, P0AB91	58	11	3277	15.4091	0.59086	0.110884	0.103492
UP_KEYWORDS	Cell inner membrane	21	35	0.0187647	P06974, P0AC05, P07018, P76330, P76298, P0AAP1, P0ABX8, P05704, P76299, P33135, P50466, P0AF06, P0AC07, P75908, P0AGE4, P15070, P02942, P09348, P07017, P0ABZ1, P25798	60	892	4139	1.62405	0.685107	0.104059	0.0887059
GOTERM_BP_DIRECT	GO:0009073~aromatic amino acid family biosynthetic process	3	5	0.023659	P00888, P00887, P0AB91	58	14	3277	12.1071	0.762267	0.157727	0.147212
GOTERM_MF_DIRECT	GO:0043424~protein histidine kinase binding	2	3.33333	0.0249561	P02942, P07017	41	2	3186	77.7073	0.554577	0.0887329	0.0748684
GOTERM_CC_DIRECT	GO:0005886~plasma membrane	27	45	0.0275067	P06974, P0AC05, P05704, P33135, P52613, P0AF06, P0AC07, P0AGE4, P07330, P02942, P15070, P0ABZ1, P07018, P76330, P76298, P0AAP1, P0ABX8, P76299, P04949, P50466, P0A9H9, P75908, P22586, P07363, P07364, P09348, P25798	55	1021	2941	1.41407	0.473508	0.126531	0.115528
UP_SEQ_FEATURE	region of interest:The 3 Arg may form a positively charged pocket, which binds the alpha-carboxyl group of the attractant AA	2	3.33333	0.0282553	P02942, P07017	60	2	4147	69.1167	0.912514	0.485991	0.485991
UP_SEQ_FEATURE	domain:CheW-like	2	3.33333	0.0282553	P0A964, P07363	60	2	4147	69.1167	0.912514	0.485991	0.485991
UP_KEYWORDS	Cell membrane	23	38.3333	0.0283844	P06974, P0AC05, P07018, P76330, P76298, P0AAP1, P0ABX8, P05704, P76299, P33135, P50466, P0AF06, P52613, P0AC07, P75908, P0AGE4, P22586, P15070, P02942, P09348, P07017, P0ABZ1, P25798	60	1052	4139	1.50819	0.827351	0.144287	0.122999
INTERPRO	IPR001029:Flagellin, D0/D1 domain	2	3.33333	0.0296094	P04949, P29744	60	2	3956	65.9333	0.9703	0.230953	0.215162
INTERPRO	IPR001543:Surface presentation of antigen (SpoA)	2	3.33333	0.0296094	P06974, P15070	60	2	3956	65.9333	0.9703	0.230953	0.215162
INTERPRO	IPR002545:CheW-like protein	2	3.33333	0.0296094	P0A964, P07363	60	2	3956	65.9333	0.9703	0.230953	0.215162
GOTERM_BP_DIRECT	GO:0097588~archaeal or bacterial-type flagellum-dependent cell motility	2	3.33333	0.0344906	P22586, P0AF06	58	2	3277	56.5	0.878272	0.172453	0.160956
GOTERM_BP_DIRECT	GO:0051271~negative regulation of cellular component movement	2	3.33333	0.0344906	P75908, P31129	58	2	3277	56.5	0.878272	0.172453	0.160956
GOTERM_BP_DIRECT	GO:0051649~establishment of localization in cell	2	3.33333	0.0344906	P0A964, P07363	58	2	3277	56.5	0.878272	0.172453	0.160956
UP_KEYWORDS	Aromatic amino acid biosynthesis	3	5	0.0352658	P00888, P00887, P0AB91	60	21	4139	9.85476	0.888091	0.165478	0.141063
GOTERM_CC_DIRECT	GO:0030694~bacterial-type flagellum basal body, rod	2	3.33333	0.0363912	P0ABW9, P0ABX2	55	2	2941	53.4727	0.573698	0.1395	0.127369
SMART	SM00260:CheW	2	3.33333	0.0424951	P0A964, P07363	18	2	792	44	0.478667	0.127485	0.127485
UP_KEYWORDS	Membrane	24	40	0.0497489	P06974, P0AC05, P07018, P76330, P76298, P0AAP1, P0ABX8, P05704, P76299, P33135, P50466, P0AF06, P52613, P0AC07, P75908, P0AGE4, P0A6S0, P22586, P15070, P02942, P09348, P07017, P0ABZ1, P25798	60	1174	4139	1.41022	0.955522	0.216763	0.184781
UP_KEYWORDS	Transmembrane helix	19	31.6667	0.0675065	P0AC05, P07018, P76330, P76298, P0AAP1, P0ABX8, P05704, P76299, P33135, P50466, P0AF06, P0AC07, P75908, P0AGE4, P22586, P02942, P09348, P07017, P25798	60	892	4139	1.46938	0.985927	0.274527	0.234023
UP_KEYWORDS	Transmembrane	19	31.6667	0.0989089	P0AC05, P07018, P76330, P76298, P0AAP1, P0ABX8, P05704, P76299, P33135, P50466, P0AF06, P0AC07, P75908, P0AGE4, P22586, P02942, P09348, P07017, P25798	60	936	4139	1.4003	0.998259	0.37709	0.321454
UP_SEQ_FEATURE	transmembrane region	18	30	0.0993108	P0AC05, P07018, P76330, P76298, P0AAP1, P05704, P76299, P33135, P50466, P0AF06, P0AC07, P75908, P0AGE4, P22586, P02942, P09348, P07017, P25798	60	875	4147	1.42183	0.999862	1	1

## Sheet: DAVID_Output_SD300
Spectral Depth 300; Chemotaxis signaling Module
Category	Term	Count	%	PValue	Genes	List Total	Pop Hits	Pop Total	Fold Enrichment	Bonferroni	Benjamini	FDR
UP_KEYWORDS	Chemotaxis	9	100	1.50707e-19	P0A964, P07018, P05704, P07330, P07363, P02942, P07364, P50466, P07017	9	22	4139	188.136	3.16486e-18	3.16486e-18	3.01415e-18
KEGG_PATHWAY	eco02030:Bacterial chemotaxis	9	100	1.44438e-16	P0A964, P07018, P05704, P07330, P07363, P02942, P07364, P50466, P07017	9	20	1564	78.2	2.22045e-16	2.88876e-16	2.88876e-16
GOTERM_BP_DIRECT	GO:0006935~chemotaxis	8	88.8889	1.6975e-15	P0A964, P07018, P05704, P07330, P07363, P02942, P07364, P07017	9	22	3277	132.404	1.9984e-14	1.86725e-14	1.86725e-14
UP_SEQ_FEATURE	domain:Methyl-accepting transducer	5	55.5556	2.84207e-11	P07018, P05704, P02942, P50466, P07017	9	5	4147	460.778	6.53676e-10	6.82098e-10	6.82098e-10
UP_KEYWORDS	Transducer	5	55.5556	2.86412e-11	P07018, P05704, P02942, P50466, P07017	9	5	4139	459.889	6.01465e-10	3.00733e-10	2.86412e-10
INTERPRO	IPR004090:Chemotaxis methyl-accepting receptor	5	55.5556	3.43211e-11	P07018, P05704, P02942, P50466, P07017	9	5	3956	439.556	8.23706e-10	4.11854e-10	4.11854e-10
INTERPRO	IPR004089:Methyl-accepting chemotaxis protein (MCP) signalling domain	5	55.5556	3.43211e-11	P07018, P05704, P02942, P50466, P07017	9	5	3956	439.556	8.23706e-10	4.11854e-10	4.11854e-10
KEGG_PATHWAY	eco02020:Two-component system	9	100	4.83018e-09	P0A964, P07018, P05704, P07330, P07363, P02942, P07364, P50466, P07017	9	146	1564	10.7123	9.66036e-09	4.83018e-09	4.83018e-09
SMART	SM00283:MA	5	55.5556	2.14243e-08	P07018, P05704, P02942, P50466, P07017	9	5	792	88	2.14243e-07	2.14243e-07	2.14243e-07
INTERPRO	IPR004091:Chemotaxis methyl-accepting receptor, methyl-accepting site	4	44.4444	2.17044e-08	P07018, P05704, P02942, P07017	9	4	3956	439.556	5.20905e-07	1.30226e-07	1.30226e-07
INTERPRO	IPR003122:Chemotaxis methyl-accepting receptor, ligand-binding	4	44.4444	2.17044e-08	P07018, P05704, P02942, P07017	9	4	3956	439.556	5.20905e-07	1.30226e-07	1.30226e-07
GOTERM_MF_DIRECT	GO:0004888~transmembrane signaling receptor activity	4	44.4444	4.15489e-08	P07018, P05704, P02942, P07017	9	4	3186	354	4.15488e-07	4.15489e-07	4.15489e-07
INTERPRO	IPR003660:HAMP linker domain	5	55.5556	4.9524e-08	P07018, P05704, P02942, P50466, P07017	9	22	3956	99.899	1.18857e-06	2.37715e-07	2.37715e-07
UP_KEYWORDS	Methylation	5	55.5556	7.13469e-08	P07018, P05704, P02942, P50466, P07017	9	25	4139	91.9778	1.49828e-06	4.99428e-07	4.75646e-07
GOTERM_BP_DIRECT	GO:0007165~signal transduction	4	44.4444	9.53481e-08	P0A964, P05704, P02942, P50466	9	5	3277	291.289	1.14418e-06	5.24415e-07	5.24415e-07
GOTERM_MF_DIRECT	GO:0004871~signal transducer activity	4	44.4444	8.67396e-07	P0A964, P07018, P50466, P07017	9	9	3186	157.333	8.67392e-06	4.33698e-06	4.33698e-06
SMART	SM00319:TarH	4	44.4444	2.70272e-06	P07018, P05704, P02942, P07017	9	4	792	88	2.70269e-05	1.35136e-05	1.35136e-05
UP_SEQ_FEATURE	domain:HAMP	4	44.4444	4.50275e-06	P07018, P05704, P02942, P07017	9	19	4147	97.0058	0.000103558	5.4033e-05	5.4033e-05
SMART	SM00304:HAMP	4	44.4444	0.000357263	P07018, P05704, P02942, P07017	9	16	792	22	0.00356689	0.00119088	0.00119088
UP_SEQ_FEATURE	domain:CheW-like	2	22.2222	0.00385495	P0A964, P07363	9	2	4147	460.778	0.0850037	0.0231297	0.0231297
UP_SEQ_FEATURE	region of interest:The 3 Arg may form a positively charged pocket, which binds the alpha-carboxyl group of the attractant AA	2	22.2222	0.00385495	P02942, P07017	9	2	4147	460.778	0.0850037	0.0231297	0.0231297
INTERPRO	IPR002545:CheW-like protein	2	22.2222	0.00404091	P0A964, P07363	9	2	3956	439.556	0.0926058	0.0161636	0.0161636
GOTERM_BP_DIRECT	GO:0051649~establishment of localization in cell	2	22.2222	0.0048773	P0A964, P07363	9	2	3277	364.111	0.0569828	0.0178834	0.0178834
GOTERM_MF_DIRECT	GO:0043424~protein histidine kinase binding	2	22.2222	0.00501645	P02942, P07017	9	2	3186	354	0.0490471	0.0167215	0.0167215
UP_SEQ_FEATURE	topological domain:Cytoplasmic	5	55.5556	0.0161291	P07018, P05704, P02942, P50466, P07017	9	575	4147	4.00676	0.312018	0.0653094	0.0653094
UP_SEQ_FEATURE	topological domain:Periplasmic	5	55.5556	0.0163274	P07018, P05704, P02942, P50466, P07017	9	577	4147	3.99288	0.3152	0.0653094	0.0653094
SMART	SM00260:CheW	2	22.2222	0.0201126	P0A964, P07363	9	2	792	88	0.183866	0.0502816	0.0502816
GOTERM_CC_DIRECT	GO:0005886~plasma membrane	7	77.7778	0.0241181	P07018, P05704, P07330, P07363, P02942, P07364, P50466	9	1021	2941	2.2404	0.114912	0.120591	0.120591
GOTERM_CC_DIRECT	GO:0005887~integral component of plasma membrane	4	44.4444	0.0601387	P07018, P05704, P02942, P07017	9	352	2941	3.71338	0.266637	0.150347	0.150347
UP_SEQ_FEATURE	transmembrane region	5	55.5556	0.0667411	P07018, P05704, P02942, P50466, P07017	9	875	4147	2.63302	0.795803	0.228827	0.228827
UP_KEYWORDS	Transmembrane helix	5	55.5556	0.0714344	P07018, P05704, P02942, P50466, P07017	9	892	4139	2.57785	0.789106	0.291344	0.277471
UP_KEYWORDS	Cell inner membrane	5	55.5556	0.0714344	P07018, P05704, P02942, P50466, P07017	9	892	4139	2.57785	0.789106	0.291344	0.277471
UP_KEYWORDS	Transmembrane	5	55.5556	0.0832413	P07018, P05704, P02942, P50466, P07017	9	936	4139	2.45667	0.838803	0.291344	0.277471
Spectral Depth 300; c-di-GMP Synthesis Module
Category	Term	Count	%	PValue	Genes	List Total	Pop Hits	Pop Total	Fold Enrichment	Bonferroni	Benjamini	FDR
GOTERM_MF_DIRECT	GO:0052621~diguanylate cyclase activity	6	100	9.24095e-14	P75908, P77302, P31129, P76330, P0AAP1, P0AA89	6	10	3186	318.6	8.31335e-13	8.31686e-13	8.31686e-13
UP_SEQ_FEATURE	domain:GGDEF	6	100	6.06889e-13	P75908, P77302, P31129, P76330, P0AAP1, P0AA89	6	17	4147	243.941	7.28217e-12	7.88955e-12	7.88955e-12
INTERPRO	IPR000160:GGDEF domain	6	100	1.44379e-12	P75908, P77302, P31129, P76330, P0AAP1, P0AA89	6	19	3956	208.211	1.01061e-11	1.01065e-11	1.01065e-11
UP_KEYWORDS	GTP-binding	6	100	1.69564e-10	P75908, P77302, P31129, P76330, P0AAP1, P0AA89	6	48	4139	86.2292	2.54347e-09	2.54347e-09	2.54347e-09
GOTERM_MF_DIRECT	GO:0005525~GTP binding	6	100	1.05233e-09	P75908, P77302, P31129, P76330, P0AAP1, P0AA89	6	53	3186	60.1132	9.47094e-09	4.73547e-09	4.73547e-09
SMART	SM00267:DUF1	6	100	4.53476e-09	P75908, P77302, P31129, P76330, P0AAP1, P0AA89	6	19	792	41.6842	9.06952e-09	9.06952e-09	9.06952e-09
UP_KEYWORDS	Magnesium	6	100	7.74097e-07	P75908, P77302, P31129, P76330, P0AAP1, P0AA89	6	250	4139	16.556	1.16114e-05	5.80573e-06	5.80573e-06
UP_KEYWORDS	Nucleotide-binding	6	100	2.19175e-05	P75908, P77302, P31129, P76330, P0AAP1, P0AA89	6	486	4139	8.51646	0.000328711	0.000109587	0.000109587
UP_KEYWORDS	Transferase	6	100	4.70935e-05	P75908, P77302, P31129, P76330, P0AAP1, P0AA89	6	566	4139	7.31272	0.00070617	0.000176601	0.000176601
UP_KEYWORDS	Metal-binding	6	100	7.99659e-05	P75908, P77302, P31129, P76330, P0AAP1, P0AA89	6	629	4139	6.58029	0.00119882	0.000239898	0.000239898
GOTERM_MF_DIRECT	GO:0046872~metal ion binding	5	83.3333	0.00035726	P75908, P77302, P76330, P0AAP1, P0AA89	6	300	3186	8.85	0.00321075	0.00107178	0.00107178
GOTERM_BP_DIRECT	GO:0051271~negative regulation of cellular component movement	2	33.3333	0.00244014	P75908, P31129	5	2	3277	655.4	0.0265164	0.0244014	0.0244014
Spectral Depth 300; DHAP Synthase Module
Category	Term	Count	%	PValue	Genes	List Total	Pop Hits	Pop Total	Fold Enrichment	Bonferroni	Benjamini	FDR
INTERPRO	IPR006219:DHAP synthase, class 1	3	100	3.83485e-07	P00888, P00887, P0AB91	3	3	3956	1318.67	1.15045e-06	1.15046e-06	7.6697e-07
GOTERM_MF_DIRECT	GO:0003849~3-deoxy-7-phosphoheptulonate synthase activity	3	100	5.91284e-07	P00888, P00887, P0AB91	3	3	3186	1062	1.77385e-06	1.77385e-06	1.77385e-06
INTERPRO	IPR006218:DAHP synthetase I/KDSA	3	100	7.6697e-07	P00888, P00887, P0AB91	3	4	3956	989	2.30091e-06	1.15046e-06	7.6697e-07
GOTERM_BP_DIRECT	GO:0009423~chorismate biosynthetic process	3	100	1.02464e-05	P00888, P00887, P0AB91	3	11	3277	297.909	4.09851e-05	2.54298e-05	1.69532e-05
PIR_SUPERFAMILY	PIRSF001361:3-deoxy-7-phosphoheptulonate synthase	3	100	1.19192e-05	P00888, P00887, P0AB91	3	3	710	236.667	1.19192e-05	1.19192e-05	1.19192e-05
GOTERM_BP_DIRECT	GO:0009073~aromatic amino acid family biosynthetic process	3	100	1.69532e-05	P00888, P00887, P0AB91	3	14	3277	234.071	6.7811e-05	2.54298e-05	1.69532e-05
UP_KEYWORDS	Aromatic amino acid biosynthesis	3	100	2.45224e-05	P00888, P00887, P0AB91	3	21	4139	197.095	9.80861e-05	9.80897e-05	9.80897e-05
GOTERM_BP_DIRECT	GO:0008652~cellular amino acid biosynthetic process	3	100	0.000124075	P00888, P00887, P0AB91	3	37	3277	88.5676	0.000496207	0.000124075	0.000124075
KEGG_PATHWAY	eco00400:Phenylalanine, tyrosine and tryptophan biosynthesis	3	100	0.000171812	P00888, P00887, P0AB91	3	21	1564	74.4762	0.000858765	0.00085906	0.000343624
INTERPRO	IPR013785:Aldolase-type TIM barrel	3	100	0.000299885	P00888, P00887, P0AB91	3	69	3956	57.3333	0.000899386	0.000299885	0.000299885
UP_KEYWORDS	Amino-acid biosynthesis	3	100	0.000613411	P00888, P00887, P0AB91	3	103	4139	40.1845	0.00245139	0.00122682	0.00122682
KEGG_PATHWAY	eco01230:Biosynthesis of amino acids	3	100	0.00564771	P00888, P00887, P0AB91	3	118	1564	13.2542	0.0279214	0.0141193	0.00564771
GOTERM_MF_DIRECT	GO:0042802~identical protein binding	3	100	0.00726412	P00888, P00887, P0AB91	3	272	3186	11.7132	0.0216344	0.0108962	0.0108962
KEGG_PATHWAY	eco01130:Biosynthesis of antibiotics	3	100	0.0153166	P00888, P00887, P0AB91	3	194	1564	8.06186	0.0742728	0.0255277	0.0153166
UP_KEYWORDS	Transferase	3	100	0.0186715	P00888, P00887, P0AB91	3	566	4139	7.31272	0.0726201	0.0248953	0.0248953
KEGG_PATHWAY	eco01110:Biosynthesis of secondary metabolites	3	100	0.03476	P00888, P00887, P0AB91	3	292	1564	5.35616	0.16213	0.04345	0.03476
Spectral Depth 300; Flagellum Module
Category	Term	Count	%	PValue	Genes	List Total	Pop Hits	Pop Total	Fold Enrichment	Bonferroni	Benjamini	FDR
KEGG_PATHWAY	eco02040:Flagellar assembly	31	93.9394	1.01779e-57	P06974, P0AC05, P0ABW9, P75933, P33135, P52614, P52612, P75937, P52613, P75936, P0AF06, P0AEM4, P33235, P0AC07, P75938, P0ABX5, P15070, P0ABX2, P0A8T5, P0ABZ1, P29744, P76298, P76299, P04949, P31068, P0A6S3, P0A6S0, P26608, P22586, P09348, P25798	31	36	1564	43.4444	3.05337e-57	3.05337e-57	3.05337e-57
UP_KEYWORDS	Bacterial flagellum	18	54.5455	7.63647e-36	P06974, P0ABW9, P33135, P04949, P75937, P33235, P0AC07, P0A6S3, P75938, P0A6S0, P0ABX5, P22586, P15070, P0ABX2, P0A8T5, P0ABZ1, P25798, P29744	33	20	4139	112.882	2.36731e-34	2.36731e-34	2.06185e-34
GOTERM_BP_DIRECT	GO:0071973~bacterial-type flagellum-dependent cell motility	20	60.6061	3.73959e-34	P06974, P75933, P04949, P75942, P52614, P52612, P31068, P52613, P33235, P0A6S3, P75938, P0A6S0, P26608, P0ABX5, P15070, P09348, P0A8T5, P0ABZ1, P25798, P29744	33	30	3277	66.202	8.60106e-33	8.2271e-33	7.47918e-33
UP_KEYWORDS	Bacterial flagellum biogenesis	12	36.3636	1.02574e-20	P0AC05, P76298, P26608, P76299, P75933, P75942, P52614, P52612, P0AEM4, P31068, P52613, P75936	33	17	4139	88.5348	3.17979e-19	1.58989e-19	1.38475e-19
GOTERM_CC_DIRECT	GO:0009425~bacterial-type flagellum basal body	11	33.3333	2.19623e-19	P0AC05, P06974, P75938, P0ABX8, P22586, P33135, P15070, P75937, P0A8T5, P0ABZ1, P0AC07	32	12	2941	84.2474	4.17283e-18	4.17283e-18	3.73358e-18
GOTERM_MF_DIRECT	GO:0003774~motor activity	8	24.2424	7.81842e-17	P06974, P0A6S0, P15070, P31068, P52613, P0A8T5, P0ABZ1, P25798	16	8	3186	199.125	1.11022e-15	7.81842e-16	7.81842e-16
GOTERM_BP_DIRECT	GO:0044780~bacterial-type flagellum assembly	10	30.303	1.13279e-15	P76298, P26608, P76299, P33135, P75942, P52614, P52612, P0ABZ1, P33235, P0AC07	33	15	3277	66.202	2.55351e-14	1.24607e-14	1.13279e-14
GOTERM_CC_DIRECT	GO:0009424~bacterial-type flagellum hook	9	27.2727	2.54143e-15	P75938, P0ABW9, P0ABX5, P52614, P75937, P0ABX2, P75936, P33235, P29744	32	10	2941	82.7156	4.85167e-14	2.41436e-14	2.16022e-14
GOTERM_BP_DIRECT	GO:0071978~bacterial-type flagellum-dependent swarming motility	8	24.2424	6.93421e-12	P75938, P0ABW9, P0ABX8, P0ABX5, P09348, P75937, P0ABX2, P75936	33	13	3277	61.1096	1.59487e-10	5.08509e-11	4.62281e-11
UP_KEYWORDS	Flagellar rotation	7	21.2121	1.07644e-11	P06974, P0ABX8, P22586, P15070, P09348, P0AF06, P0ABZ1	33	9	4139	97.5522	3.33696e-10	1.11232e-10	9.68795e-11
GOTERM_BP_DIRECT	GO:0044781~bacterial-type flagellum organization	7	21.2121	1.08149e-10	P0AC05, P75933, P22586, P0AEM4, P31068, P52613, P75936	33	10	3277	69.5121	2.48744e-09	5.94822e-10	5.40747e-10
UP_KEYWORDS	Bacterial flagellum protein export	6	18.1818	1.18999e-10	P0AC05, P76298, P76299, P52612, P31068, P52613	33	6	4139	125.424	3.68896e-09	7.99982e-10	6.96758e-10
UP_KEYWORDS	Chemotaxis	8	24.2424	1.29029e-10	P06974, P0ABX8, P22586, P15070, P09348, P52613, P0AF06, P0ABZ1	33	22	4139	45.6088	3.99991e-09	7.99982e-10	6.96758e-10
INTERPRO	IPR001444:Flagellar basal body rod protein, N-terminal	6	18.1818	1.49168e-10	P75938, P0ABW9, P0ABX5, P75937, P0ABX2, P33235	33	6	3956	119.879	9.69594e-09	9.69594e-09	9.69594e-09
INTERPRO	IPR019776:Flagellar basal body rod protein, conserved site	5	15.1515	1.75455e-08	P75938, P0ABW9, P0ABX5, P75937, P0ABX2	33	5	3956	119.879	1.14046e-06	3.80153e-07	3.80153e-07
INTERPRO	IPR010930:Flagellar basal-body/hook protein, C-terminal domain	5	15.1515	1.75455e-08	P75938, P0ABX5, P75937, P0ABX2, P33235	33	5	3956	119.879	1.14046e-06	3.80153e-07	3.80153e-07
GOTERM_BP_DIRECT	GO:0006935~chemotaxis	7	21.2121	3.53956e-08	P0ABX8, P22586, P15070, P09348, P52613, P0AF06, P0ABZ1	33	22	3277	31.5964	8.14098e-07	1.55741e-07	1.41582e-07
GOTERM_MF_DIRECT	GO:0005198~structural molecule activity	5	15.1515	4.21766e-07	P0A6S3, P04949, P0A8T5, P33235, P29744	16	15	3186	66.375	4.21766e-06	2.10883e-06	2.10883e-06
UP_KEYWORDS	Protein transport	6	18.1818	0.000157965	P0AC05, P76298, P76299, P52612, P31068, P52613	33	69	4139	10.9065	0.00488534	0.000816154	0.000710844
INTERPRO	IPR020013:Fagellar hook-basal body protein, FlgE/F/G	3	9.09091	0.000189246	P75938, P0ABX5, P75937	33	3	3956	119.879	0.0122268	0.00307526	0.00307526
GOTERM_BP_DIRECT	GO:0009306~protein secretion	4	12.1212	0.000286347	P0AC05, P76298, P76299, P0AC07	33	14	3277	28.3723	0.00656529	0.00104994	0.000954491
KEGG_PATHWAY	eco02030:Bacterial chemotaxis	5	15.1515	0.000431333	P06974, P15070, P09348, P0AF06, P0ABZ1	31	20	1564	12.6129	0.00129344	0.000646999	0.000646999
UP_KEYWORDS	Secreted	3	9.09091	0.00250742	P04949, P33235, P29744	33	10	4139	37.6273	0.074876	0.0111043	0.00967146
GOTERM_CC_DIRECT	GO:0005576~extracellular region	3	9.09091	0.014814	P04949, P33235, P29744	32	18	2941	15.3177	0.246911	0.0938219	0.0839459
INTERPRO	IPR001029:Flagellin, D0/D1 domain	2	6.06061	0.0161146	P04949, P29744	33	2	3956	119.879	0.652148	0.174574	0.174574
INTERPRO	IPR001543:Surface presentation of antigen (SpoA)	2	6.06061	0.0161146	P06974, P15070	33	2	3956	119.879	0.652148	0.174574	0.174574
GOTERM_BP_DIRECT	GO:0097588~archaeal or bacterial-type flagellum-dependent cell motility	2	6.06061	0.0194377	P22586, P0AF06	33	2	3277	99.303	0.363307	0.0610898	0.0555362
GOTERM_CC_DIRECT	GO:0030694~bacterial-type flagellum basal body, rod	2	6.06061	0.0209737	P0ABW9, P0ABX2	32	2	2941	91.9062	0.331513	0.0996251	0.0891383
GOTERM_CC_DIRECT	GO:0009288~bacterial-type flagellum	2	6.06061	0.0415214	P31068, P52613	32	4	2941	45.9531	0.553249	0.157781	0.141173
UP_KEYWORDS	Cell membrane	14	42.4242	0.0421006	P06974, P0AC05, P76298, P0ABX8, P76299, P33135, P0AF06, P52613, P0AC07, P22586, P15070, P09348, P0ABZ1, P25798	33	1052	4139	1.66914	0.736417	0.153758	0.133918
UP_KEYWORDS	Membrane	15	45.4545	0.0446394	P06974, P0AC05, P76298, P0ABX8, P76299, P33135, P0AF06, P52613, P0AC07, P0A6S0, P22586, P15070, P09348, P0ABZ1, P25798	33	1174	4139	1.60252	0.757234	0.153758	0.133918
UP_KEYWORDS	Cell inner membrane	12	36.3636	0.0651747	P0AC05, P06974, P76298, P0ABX8, P76299, P33135, P15070, P09348, P0AF06, P0ABZ1, P25798, P0AC07	33	892	4139	1.68732	0.876222	0.202042	0.175972
UP_SEQ_FEATURE	signal peptide	8	24.2424	0.0878815	P0AC05, P0A6S3, P0A6S0, P0ABX8, P75933, P75936, P25798, P0AC07	33	508	4147	1.979	0.979003	1	1
UP_KEYWORDS	Hydrogen ion transport	2	6.06061	0.0961077	P09348, P52612	33	13	4139	19.296	0.956387	0.270849	0.235901

## Sheet: DAVID_Output_SD1000
Spectral Depth 1000; Chemoreception Module
Category	Term	Count	%	PValue	Genes	List Total	Pop Hits	Pop Total	Fold Enrichment	Bonferroni	Benjamini	FDR
UP_SEQ_FEATURE	domain:Methyl-accepting transducer	5	100	4.06325e-13	P07018, P05704, P02942, P50466, P07017	5	5	4147	829.4	4.06342e-12	4.46958e-12	4.46958e-12
UP_KEYWORDS	Transducer	5	100	4.09477e-13	P07018, P05704, P02942, P50466, P07017	5	5	4139	827.8	4.0945e-12	4.09477e-12	4.09477e-12
INTERPRO	IPR004090:Chemotaxis methyl-accepting receptor	5	100	4.90699e-13	P07018, P05704, P02942, P50466, P07017	5	5	3956	791.2	3.92575e-12	1.9628e-12	1.9628e-12
INTERPRO	IPR004089:Methyl-accepting chemotaxis protein (MCP) signalling domain	5	100	4.90699e-13	P07018, P05704, P02942, P50466, P07017	5	5	3956	791.2	3.92575e-12	1.9628e-12	1.9628e-12
SMART	SM00283:MA	5	100	3.07309e-10	P07018, P05704, P02942, P50466, P07017	5	5	792	158.4	1.22924e-09	1.22924e-09	1.22924e-09
UP_KEYWORDS	Chemotaxis	5	100	5.99065e-10	P07018, P05704, P02942, P50466, P07017	5	22	4139	188.136	5.99065e-09	2.99532e-09	2.99532e-09
INTERPRO	IPR003660:HAMP linker domain	5	100	7.17892e-10	P07018, P05704, P02942, P50466, P07017	5	22	3956	179.818	5.74314e-09	1.91438e-09	1.91438e-09
UP_KEYWORDS	Methylation	5	100	1.03598e-09	P07018, P05704, P02942, P50466, P07017	5	25	4139	165.56	1.03598e-08	3.45325e-09	3.45325e-09
INTERPRO	IPR004091:Chemotaxis methyl-accepting receptor, methyl-accepting site	4	80	1.55149e-09	P07018, P05704, P02942, P07017	5	4	3956	791.2	1.24119e-08	2.48239e-09	2.48239e-09
INTERPRO	IPR003122:Chemotaxis methyl-accepting receptor, ligand-binding	4	80	1.55149e-09	P07018, P05704, P02942, P07017	5	4	3956	791.2	1.24119e-08	2.48239e-09	2.48239e-09
GOTERM_MF_DIRECT	GO:0004888~transmembrane signaling receptor activity	4	80	2.97058e-09	P07018, P05704, P02942, P07017	5	4	3186	637.2	1.48529e-08	1.48529e-08	1.48529e-08
KEGG_PATHWAY	eco02030:Bacterial chemotaxis	5	100	1.95086e-08	P07018, P05704, P02942, P50466, P07017	5	20	1564	78.2	3.90171e-08	3.90171e-08	3.90171e-08
SMART	SM00319:TarH	4	80	1.93789e-07	P07018, P05704, P02942, P07017	5	4	792	158.4	7.75156e-07	3.87578e-07	3.87578e-07
UP_SEQ_FEATURE	domain:HAMP	4	80	3.25378e-07	P07018, P05704, P02942, P07017	5	19	4147	174.611	3.25377e-06	1.78958e-06	1.78958e-06
GOTERM_BP_DIRECT	GO:0006935~chemotaxis	4	80	1.04666e-06	P07018, P05704, P02942, P07017	5	22	3277	119.164	6.27995e-06	5.2333e-06	5.2333e-06
GOTERM_BP_DIRECT	GO:0007165~signal transduction	3	60	1.11643e-05	P05704, P02942, P50466	5	5	3277	393.24	6.69837e-05	2.79107e-05	2.79107e-05
SMART	SM00304:HAMP	4	80	2.68207e-05	P07018, P05704, P02942, P07017	5	16	792	39.6	0.000107279	3.5761e-05	3.5761e-05
GOTERM_MF_DIRECT	GO:0004871~signal transducer activity	3	60	4.24477e-05	P07018, P50466, P07017	5	9	3186	212.4	0.000212221	0.000106119	0.000106119
KEGG_PATHWAY	eco02020:Two-component system	5	100	7.31374e-05	P07018, P05704, P02942, P50466, P07017	5	146	1564	10.7123	0.00014627	7.31374e-05	7.31374e-05
UP_SEQ_FEATURE	topological domain:Cytoplasmic	5	100	0.000366288	P07018, P05704, P02942, P50466, P07017	5	575	4147	7.21217	0.00365685	0.00102142	0.00102142
UP_SEQ_FEATURE	topological domain:Periplasmic	5	100	0.000371424	P07018, P05704, P02942, P50466, P07017	5	577	4147	7.18718	0.00370804	0.00102142	0.00102142
UP_SEQ_FEATURE	region of interest:The 3 Arg may form a positively charged pocket, which binds the alpha-carboxyl group of the attractant AA	2	40	0.00192841	P02942, P07017	5	2	4147	829.4	0.0191176	0.00361397	0.00361397
UP_SEQ_FEATURE	transmembrane region	5	100	0.00197125	P07018, P05704, P02942, P50466, P07017	5	875	4147	4.73943	0.0195386	0.00361397	0.00361397
UP_KEYWORDS	Cell inner membrane	5	100	0.00214577	P07018, P05704, P02942, P50466, P07017	5	892	4139	4.64013	0.0212516	0.00429153	0.00429153
UP_KEYWORDS	Transmembrane helix	5	100	0.00214577	P07018, P05704, P02942, P50466, P07017	5	892	4139	4.64013	0.0212516	0.00429153	0.00429153
GOTERM_MF_DIRECT	GO:0043424~protein histidine kinase binding	2	40	0.0025098	P02942, P07017	5	2	3186	637.2	0.0124862	0.004183	0.004183
UP_KEYWORDS	Transmembrane	5	100	0.00260234	P07018, P05704, P02942, P50466, P07017	5	936	4139	4.42201	0.0257208	0.00433723	0.00433723
UP_KEYWORDS	Cell membrane	5	100	0.00415558	P07018, P05704, P02942, P50466, P07017	5	1052	4139	3.93441	0.0407872	0.00593654	0.00593654
GOTERM_CC_DIRECT	GO:0005887~integral component of plasma membrane	4	80	0.00620027	P07018, P05704, P02942, P07017	5	352	2941	6.68409	0.0184857	0.0186008	0.0124005
UP_KEYWORDS	Membrane	5	100	0.00644909	P07018, P05704, P02942, P50466, P07017	5	1174	4139	3.52555	0.0626512	0.00806137	0.00806137
Spectral Depth 1000; Chemotransmission
Category	Term	Count	%	PValue	Genes	List Total	Pop Hits	Pop Total	Fold Enrichment	Bonferroni	Benjamini	FDR
UP_KEYWORDS	Chemotaxis	3	100	2.69747e-05	P0A964, P07363, P07364	3	22	4139	188.136	0.000296681	0.000296721	0.000296721
GOTERM_BP_DIRECT	GO:0006935~chemotaxis	3	100	4.3035e-05	P0A964, P07363, P07364	3	22	3277	148.955	0.000387248	0.00034428	0.00034428
KEGG_PATHWAY	eco02030:Bacterial chemotaxis	3	100	0.000155449	P0A964, P07363, P07364	3	20	1564	78.2	0.000310874	0.000310898	0.000310898
UP_SEQ_FEATURE	domain:CheW-like	2	66.6667	0.000964436	P0A964, P07363	3	2	4147	1382.33	0.00864652	0.00964436	0.00964436
INTERPRO	IPR002545:CheW-like protein	2	66.6667	0.00101099	P0A964, P07363	3	2	3956	1318.67	0.0120647	0.0121319	0.0121319
GOTERM_BP_DIRECT	GO:0051649~establishment of localization in cell	2	66.6667	0.00122044	P0A964, P07363	3	2	3277	1092.33	0.0109305	0.00488177	0.00488177
SMART	SM00260:CheW	2	66.6667	0.00504731	P0A964, P07363	3	2	792	264	0.0249831	0.0252366	0.0252366
KEGG_PATHWAY	eco02020:Two-component system	3	100	0.00866014	P0A964, P07363, P07364	3	146	1564	10.7123	0.0172453	0.00866014	0.00866014
Spectral Depth 1000; c-di-GMP synthesis
Category	Term	Count	%	PValue	Genes	List Total	Pop Hits	Pop Total	Fold Enrichment	Bonferroni	Benjamini	FDR
GOTERM_MF_DIRECT	GO:0052621~diguanylate cyclase activity	6	100	9.24095e-14	P75908, P77302, P31129, P76330, P0AAP1, P0AA89	6	10	3186	318.6	8.31335e-13	8.31686e-13	8.31686e-13
UP_SEQ_FEATURE	domain:GGDEF	6	100	6.06889e-13	P75908, P77302, P31129, P76330, P0AAP1, P0AA89	6	17	4147	243.941	7.28217e-12	7.88955e-12	7.88955e-12
INTERPRO	IPR000160:GGDEF domain	6	100	1.44379e-12	P75908, P77302, P31129, P76330, P0AAP1, P0AA89	6	19	3956	208.211	1.01061e-11	1.01065e-11	1.01065e-11
UP_KEYWORDS	GTP-binding	6	100	1.69564e-10	P75908, P77302, P31129, P76330, P0AAP1, P0AA89	6	48	4139	86.2292	2.54347e-09	2.54347e-09	2.54347e-09
GOTERM_MF_DIRECT	GO:0005525~GTP binding	6	100	1.05233e-09	P75908, P77302, P31129, P76330, P0AAP1, P0AA89	6	53	3186	60.1132	9.47094e-09	4.73547e-09	4.73547e-09
SMART	SM00267:DUF1	6	100	4.53476e-09	P75908, P77302, P31129, P76330, P0AAP1, P0AA89	6	19	792	41.6842	9.06952e-09	9.06952e-09	9.06952e-09
UP_KEYWORDS	Magnesium	6	100	7.74097e-07	P75908, P77302, P31129, P76330, P0AAP1, P0AA89	6	250	4139	16.556	1.16114e-05	5.80573e-06	5.80573e-06
UP_KEYWORDS	Nucleotide-binding	6	100	2.19175e-05	P75908, P77302, P31129, P76330, P0AAP1, P0AA89	6	486	4139	8.51646	0.000328711	0.000109587	0.000109587
UP_KEYWORDS	Transferase	6	100	4.70935e-05	P75908, P77302, P31129, P76330, P0AAP1, P0AA89	6	566	4139	7.31272	0.00070617	0.000176601	0.000176601
UP_KEYWORDS	Metal-binding	6	100	7.99659e-05	P75908, P77302, P31129, P76330, P0AAP1, P0AA89	6	629	4139	6.58029	0.00119882	0.000239898	0.000239898
GOTERM_MF_DIRECT	GO:0046872~metal ion binding	5	83.3333	0.00035726	P75908, P77302, P76330, P0AAP1, P0AA89	6	300	3186	8.85	0.00321075	0.00107178	0.00107178
GOTERM_BP_DIRECT	GO:0051271~negative regulation of cellular component movement	2	33.3333	0.00244014	P75908, P31129	5	2	3277	655.4	0.0265164	0.0244014	0.0244014
Spectral Depth 1000; Flagellar rotation
Category	Term	Count	%	PValue	Genes	List Total	Pop Hits	Pop Total	Fold Enrichment	Bonferroni	Benjamini	FDR
UP_KEYWORDS	Flagellar rotation	2	100	0.00217444	P09348, P0AF06	2	9	4139	459.889	0.0236605	0.0239188	0.0239188
UP_KEYWORDS	Chemotaxis	2	100	0.00531529	P09348, P0AF06	2	22	4139	188.136	0.0569389	0.0292341	0.0292341
GOTERM_BP_DIRECT	GO:0006935~chemotaxis	2	100	0.00671346	P09348, P0AF06	2	22	3277	148.955	0.0396107	0.0335673	0.0335673
KEGG_PATHWAY	eco02030:Bacterial chemotaxis	2	100	0.0127877	P09348, P0AF06	2	20	1564	78.2	0.0378747	0.0345269	0.0345269
KEGG_PATHWAY	eco02040:Flagellar assembly	2	100	0.0230179	P09348, P0AF06	2	36	1564	43.4444	0.0674764	0.0345269	0.0345269
Spectral Depth 1000; DHAP synthase
Category	Term	Count	%	PValue	Genes	List Total	Pop Hits	Pop Total	Fold Enrichment	Bonferroni	Benjamini	FDR
INTERPRO	IPR006219:DHAP synthase, class 1	3	100	3.83485e-07	P00888, P00887, P0AB91	3	3	3956	1318.67	1.15045e-06	1.15046e-06	7.6697e-07
GOTERM_MF_DIRECT	GO:0003849~3-deoxy-7-phosphoheptulonate synthase activity	3	100	5.91284e-07	P00888, P00887, P0AB91	3	3	3186	1062	1.77385e-06	1.77385e-06	1.77385e-06
INTERPRO	IPR006218:DAHP synthetase I/KDSA	3	100	7.6697e-07	P00888, P00887, P0AB91	3	4	3956	989	2.30091e-06	1.15046e-06	7.6697e-07
GOTERM_BP_DIRECT	GO:0009423~chorismate biosynthetic process	3	100	1.02464e-05	P00888, P00887, P0AB91	3	11	3277	297.909	4.09851e-05	2.54298e-05	1.69532e-05
PIR_SUPERFAMILY	PIRSF001361:3-deoxy-7-phosphoheptulonate synthase	3	100	1.19192e-05	P00888, P00887, P0AB91	3	3	710	236.667	1.19192e-05	1.19192e-05	1.19192e-05
GOTERM_BP_DIRECT	GO:0009073~aromatic amino acid family biosynthetic process	3	100	1.69532e-05	P00888, P00887, P0AB91	3	14	3277	234.071	6.7811e-05	2.54298e-05	1.69532e-05
UP_KEYWORDS	Aromatic amino acid biosynthesis	3	100	2.45224e-05	P00888, P00887, P0AB91	3	21	4139	197.095	9.80861e-05	9.80897e-05	9.80897e-05
GOTERM_BP_DIRECT	GO:0008652~cellular amino acid biosynthetic process	3	100	0.000124075	P00888, P00887, P0AB91	3	37	3277	88.5676	0.000496207	0.000124075	0.000124075
KEGG_PATHWAY	eco00400:Phenylalanine, tyrosine and tryptophan biosynthesis	3	100	0.000171812	P00888, P00887, P0AB91	3	21	1564	74.4762	0.000858765	0.00085906	0.000343624
INTERPRO	IPR013785:Aldolase-type TIM barrel	3	100	0.000299885	P00888, P00887, P0AB91	3	69	3956	57.3333	0.000899386	0.000299885	0.000299885
UP_KEYWORDS	Amino-acid biosynthesis	3	100	0.000613411	P00888, P00887, P0AB91	3	103	4139	40.1845	0.00245139	0.00122682	0.00122682
KEGG_PATHWAY	eco01230:Biosynthesis of amino acids	3	100	0.00564771	P00888, P00887, P0AB91	3	118	1564	13.2542	0.0279214	0.0141193	0.00564771
GOTERM_MF_DIRECT	GO:0042802~identical protein binding	3	100	0.00726412	P00888, P00887, P0AB91	3	272	3186	11.7132	0.0216344	0.0108962	0.0108962
KEGG_PATHWAY	eco01130:Biosynthesis of antibiotics	3	100	0.0153166	P00888, P00887, P0AB91	3	194	1564	8.06186	0.0742728	0.0255277	0.0153166
UP_KEYWORDS	Transferase	3	100	0.0186715	P00888, P00887, P0AB91	3	566	4139	7.31272	0.0726201	0.0248953	0.0248953
KEGG_PATHWAY	eco01110:Biosynthesis of secondary metabolites	3	100	0.03476	P00888, P00887, P0AB91	3	292	1564	5.35616	0.16213	0.04345	0.03476
Spectral Depth 1000; Flagellar filament Module
Category	Term	Count	%	PValue	Genes	List Total	Pop Hits	Pop Total	Fold Enrichment	Bonferroni	Benjamini	FDR
INTERPRO	IPR001029:Flagellin, D0/D1 domain	2	100	0.000505561	P04949, P29744	2	2	3956	1978	0.00202071	0.00202224	0.00202224
UP_KEYWORDS	Secreted	2	100	0.00241604	P04949, P29744	2	10	4139	413.9	0.00482625	0.00483209	0.00483209
GOTERM_MF_DIRECT	GO:0005198~structural molecule activity	2	100	0.0047081	P04949, P29744	2	15	3186	212.4	0.0047081	0.0047081	0.0047081
UP_KEYWORDS	Bacterial flagellum	2	100	0.00483209	P04949, P29744	2	20	4139	206.95	0.00964082	0.00483209	0.00483209
GOTERM_CC_DIRECT	GO:0005576~extracellular region	2	100	0.00612037	P04949, P29744	2	18	2941	163.389	0.0242576	0.0244815	0.0244815
GOTERM_BP_DIRECT	GO:0071973~bacterial-type flagellum-dependent cell motility	2	100	0.00915471	P04949, P29744	2	30	3277	109.233	0.0361191	0.0274641	0.0274641
KEGG_PATHWAY	eco02040:Flagellar assembly	2	100	0.0230179	P04949, P29744	2	36	1564	43.4444	0.045506	0.0460358	0.0460358
Spectral Depth 1000; Flagellar Rod Module
Category	Term	Count	%	PValue	Genes	List Total	Pop Hits	Pop Total	Fold Enrichment	Bonferroni	Benjamini	FDR
GOTERM_BP_DIRECT	GO:0071973~bacterial-type flagellum-dependent cell motility	2	100	0.00915471	P75938, P75942	2	30	3277	109.233	0.0536864	0.0457736	0.0457736
Spectral Depth 1000; Flagellar L- and P- Ring Module
Category	Term	Count	%	PValue	Genes	List Total	Pop Hits	Pop Total	Fold Enrichment	Bonferroni	Benjamini	FDR
UP_KEYWORDS	Bacterial flagellum	2	100	0.00483209	P0A6S3, P0A6S0	2	20	4139	206.95	0.0333382	0.0338246	0.0338246
GOTERM_BP_DIRECT	GO:0071973~bacterial-type flagellum-dependent cell motility	2	100	0.00915471	P0A6S3, P0A6S0	2	30	3277	109.233	0.0361191	0.0274641	0.0274641
KEGG_PATHWAY	eco02040:Flagellar assembly	2	100	0.0230179	P0A6S3, P0A6S0	2	36	1564	43.4444	0.0230179	0.0230179	0.0230179
Spectral Depth 1000; Flagellar Basal Body Module
Category	Term	Count	%	PValue	Genes	List Total	Pop Hits	Pop Total	Fold Enrichment	Bonferroni	Benjamini	FDR
KEGG_PATHWAY	eco02040:Flagellar assembly	11	100	1.0841e-17	P0AC05, P06974, P0ABW9, P76298, P33135, P52612, P0ABX2, P75936, P0A8T5, P25798, P0AC07	11	36	1564	43.4444	2.1682e-17	2.1682e-17	2.1682e-17
UP_KEYWORDS	Bacterial flagellum	7	63.6364	1.15631e-12	P06974, P0ABW9, P33135, P0ABX2, P0A8T5, P25798, P0AC07	11	20	4139	131.695	2.31259e-11	2.31263e-11	2.31263e-11
GOTERM_CC_DIRECT	GO:0009425~bacterial-type flagellum basal body	5	45.4545	3.29803e-08	P0AC05, P06974, P33135, P0A8T5, P0AC07	11	12	2941	111.402	3.29803e-07	3.29803e-07	2.96823e-07
UP_KEYWORDS	Bacterial flagellum biogenesis	4	36.3636	6.788e-06	P0AC05, P76298, P52612, P75936	11	17	4139	88.5348	0.000135751	6.788e-05	6.788e-05
GOTERM_BP_DIRECT	GO:0044780~bacterial-type flagellum assembly	4	36.3636	9.13992e-06	P76298, P33135, P52612, P0AC07	11	15	3277	79.4424	0.000100535	9.13992e-05	9.13992e-05
GOTERM_MF_DIRECT	GO:0003774~motor activity	3	27.2727	1.65351e-05	P06974, P0A8T5, P25798	4	8	3186	298.688	9.92068e-05	9.92109e-05	9.92109e-05
UP_KEYWORDS	Bacterial flagellum protein export	3	27.2727	7.84164e-05	P0AC05, P76298, P52612	11	6	4139	188.136	0.00156716	0.000522776	0.000522776
GOTERM_BP_DIRECT	GO:0071973~bacterial-type flagellum-dependent cell motility	4	36.3636	7.96114e-05	P06974, P52612, P0A8T5, P25798	11	30	3277	39.7212	0.000875377	0.000398057	0.000398057
GOTERM_CC_DIRECT	GO:0009424~bacterial-type flagellum hook	3	27.2727	0.000461638	P0ABW9, P0ABX2, P75936	11	10	2941	80.2091	0.0046068	0.00230819	0.00207737
GOTERM_BP_DIRECT	GO:0071978~bacterial-type flagellum-dependent swarming motility	3	27.2727	0.000642288	P0ABW9, P0ABX2, P75936	11	13	3277	68.7483	0.00704252	0.00187029	0.00187029
GOTERM_BP_DIRECT	GO:0009306~protein secretion	3	27.2727	0.000748115	P0AC05, P76298, P0AC07	11	14	3277	63.8377	0.00819855	0.00187029	0.00187029
GOTERM_CC_DIRECT	GO:0030694~bacterial-type flagellum basal body, rod	2	18.1818	0.00679	P0ABW9, P0ABX2	11	2	2941	267.364	0.0658624	0.0226333	0.02037
UP_KEYWORDS	Protein transport	3	27.2727	0.0113065	P0AC05, P76298, P52612	11	69	4139	16.3597	0.203412	0.0565323	0.0565323
INTERPRO	IPR019776:Flagellar basal body rod protein, conserved site	2	18.1818	0.0125816	P0ABW9, P0ABX2	11	5	3956	143.855	0.307316	0.218671	0.218671
INTERPRO	IPR001444:Flagellar basal body rod protein, N-terminal	2	18.1818	0.0150808	P0ABW9, P0ABX2	11	6	3956	119.879	0.356398	0.218671	0.218671
GOTERM_BP_DIRECT	GO:0044781~bacterial-type flagellum organization	2	18.1818	0.0301409	P0AC05, P75936	11	10	3277	59.5818	0.285841	0.0602818	0.0602818
UP_KEYWORDS	Cell inner membrane	6	54.5455	0.0439636	P0AC05, P06974, P76298, P33135, P25798, P0AC07	11	892	4139	2.53098	0.593099	0.175854	0.175854
UP_KEYWORDS	Cell membrane	6	54.5455	0.0828382	P0AC05, P06974, P76298, P33135, P25798, P0AC07	11	1052	4139	2.14604	0.822614	0.276127	0.276127
