# Supplementary material for: Defining hierarchical protein interaction networks from spectral analysis of bacterial proteomes
Source: eLife. 2022 Aug 17;11:e74104. doi: 10.7554/eLife.74104 (PMC9427106; doi:10.7554/eLife.74104)
Supplement: Supplementary file 3. [file elife-74104-supp3.xlsx]

## Sheet: Overview
Table S9: Data related to Figure 4--Figure Supplement 4
Supplementary File 3: Data related to Figure 6--Figure Supplement 3
Tab	Contents
Spectral Depth Table	Hierarchically clustered spectral depth matrix for B. subtilis K12 proteins coevolving with Hag
Metadata	Protein accession, module designations, BRITE categories, literature references, and other associated metadata
Module_designations	Accessions of proteins assigned to each module in the statistical hierarchy
SDX	Adjacency matrix generated by thresholding the hierarchically clustered spectral depth matrix to spectral depth 'X'
David_Output_SDX	Output table for gene set enrichment analysis of the sets of proteins within each statistical module observed at a spectral depth of 'X' using David v6.8

## Sheet: Spectral Depth Table
UniProt ID	Node Label	TlpB	McpC	TlpA	YfmS	HemAT	YvaQ	McpA	McpB	YoaH	TlpC	CheY	CcdB	CheB	CheR	CheA	CheV	CheW	CheD	SwrD	FliW	YlqH	FlaG	YaaR	FliJ	FlgM	FliZ	FlhF	FliH	FliK	FliL	FliS	YlxF	FliY	CheC	yvzB	Hag	FlgL	FliI	FliF	FlhA	FlhB	FliG	FliM	FlgD	FlgB	FlgC	FliE	FliP
P39217	TlpB	3000	3000	3000	3000	3000	3000	3000	3000	3000	3000	275	275	275	227	271	397	408	257	77	86	102	72	85	86	72	99	99	85	86	122	100	95	99	103	122	122	122	86	94	92	89	100	97	100	91	95	94	92
P54576	McpC	3000	3000	3000	3000	3000	3000	3000	3000	3000	3000	275	275	275	227	271	397	408	257	77	86	102	72	85	86	72	99	99	85	86	122	100	95	99	103	122	122	122	86	94	92	89	100	97	100	91	95	94	92
P39216	TlpA	3000	3000	3000	3000	3000	3000	3000	3000	3000	3000	275	275	275	227	271	397	408	257	77	86	102	72	85	86	72	99	99	85	86	122	100	95	99	103	122	122	122	86	94	92	89	100	97	100	91	95	94	92
O06477	YfmS	3000	3000	3000	3000	3000	3000	3000	3000	3000	3000	275	275	275	227	271	397	408	257	77	86	102	72	85	86	72	99	99	85	86	122	100	95	99	103	122	122	122	86	94	92	89	100	97	100	91	95	94	92
O07621	HemAT	3000	3000	3000	3000	3000	3000	3000	3000	3000	3000	275	275	275	227	271	397	408	257	77	86	102	72	85	86	72	99	99	85	86	122	100	95	99	103	122	122	122	86	94	92	89	100	97	100	91	95	94	92
O32239	YvaQ	3000	3000	3000	3000	3000	3000	3000	3000	3000	3000	275	275	275	227	271	397	408	257	77	86	102	72	85	86	72	99	99	85	86	122	100	95	99	103	122	122	122	86	94	92	89	100	97	100	91	95	94	92
P39214	McpA	3000	3000	3000	3000	3000	3000	3000	3000	3000	3000	275	275	275	227	271	397	408	257	77	86	102	72	85	86	72	99	99	85	86	122	100	95	99	103	122	122	122	86	94	92	89	100	97	100	91	95	94	92
P39215	McpB	3000	3000	3000	3000	3000	3000	3000	3000	3000	3000	275	275	275	227	271	397	408	257	77	86	102	72	85	86	72	99	99	85	86	122	100	95	99	103	122	122	122	86	94	92	89	100	97	100	91	95	94	92
C0SP89	YoaH	3000	3000	3000	3000	3000	3000	3000	3000	3000	542	241	241	241	175	148	416	157	112	51	65	85	59	51	63	57	89	86	63	85	99	86	89	86	85	112	112	112	83	86	86	85	89	86	89	85	86	86	86
P39209	TlpC	3000	3000	3000	3000	3000	3000	3000	3000	542	3000	135	135	135	157	132	166	130	112	61	85	85	72	86	78	69	83	93	60	78	85	86	54	86	89	103	103	103	68	85	85	83	86	85	85	83	85	83	83
P24072	CheY	275	275	275	275	275	275	275	275	241	135	3000	3000	3000	3000	516	745	1324	509	59	73	89	63	62	86	63	106	92	64	85	112	83	104	86	208	89	89	89	72	83	83	85	86	86	85	83	85	85	85
P45709	CcdB	275	275	275	275	275	275	275	275	241	135	3000	3000	3000	3000	516	745	1324	509	59	73	89	63	62	86	63	106	92	64	85	112	83	104	86	208	89	89	89	72	83	83	85	86	86	85	83	85	85	85
Q05522	CheB	275	275	275	275	275	275	275	275	241	135	3000	3000	3000	3000	516	745	1324	509	59	73	89	63	62	86	63	106	92	64	85	112	83	104	86	208	89	89	89	72	83	83	85	86	86	85	83	85	85	85
P31105	CheR	227	227	227	227	227	227	227	227	175	157	3000	3000	3000	3000	805	695	1720	493	51	60	62	60	51	62	51	96	89	85	85	113	62	89	85	85	101	101	101	79	85	79	85	89	89	86	85	85	85	85
P29072	CheA	271	271	271	271	271	271	271	271	148	132	516	516	516	805	3000	1043	516	361	51	85	54	51	51	58	51	101	110	85	93	103	103	89	97	62	130	130	130	93	103	97	93	100	97	97	93	93	93	93
P37599	CheV	397	397	397	397	397	397	397	397	416	166	745	745	745	695	1043	3000	3000	380	51	60	51	51	51	51	51	90	89	63	61	114	65	91	89	140	130	130	130	83	85	85	85	89	87	89	85	85	85	85
P39802	CheW	408	408	408	408	408	408	408	408	157	130	1324	1324	1324	1720	516	3000	3000	536	51	91	112	86	51	112	112	103	134	96	102	136	112	103	112	140	129	129	129	96	103	100	99	103	112	109	102	102	103	103
P40404	CheD	257	257	257	257	257	257	257	257	112	112	509	509	509	493	361	380	536	3000	72	85	104	85	86	175	115	150	112	85	103	148	112	99	112	663	115	115	115	89	109	104	103	112	146	108	108	109	110	112
C0H412	SwrD	77	77	77	77	77	77	77	77	51	61	59	59	59	51	51	51	51	72	3000	1083	109	97	254	224	85	160	99	108	103	99	245	51	112	112	103	103	103	103	123	128	108	191	120	119	132	128	128	128
P96503	FliW	86	86	86	86	86	86	86	86	65	85	73	73	73	60	85	60	91	85	1083	3000	120	179	112	150	100	230	179	119	119	131	248	119	163	173	204	204	204	115	164	164	146	235	194	194	179	164	172	172
O34867	YlqH	102	102	102	102	102	102	102	102	85	85	89	89	89	62	54	51	112	104	109	120	3000	437	288	112	167	114	172	115	160	147	138	193	142	169	119	119	119	99	116	116	102	118	117	119	119	121	121	121
P39737	FlaG	72	72	72	72	72	72	72	72	59	72	63	63	63	60	51	51	86	85	97	179	437	3000	248	179	167	160	327	104	149	151	141	51	136	158	148	148	148	102	132	132	104	141	136	115	138	132	132	136
P37539	YaaR	85	85	85	85	85	85	85	85	51	86	62	62	62	51	51	51	51	86	254	112	288	248	3000	224	126	71	131	62	85	51	112	51	101	187	86	86	86	63	83	85	72	85	85	84	84	84	84	85
P20487	FliJ	86	86	86	86	86	86	86	86	63	78	86	86	86	62	58	51	112	175	224	150	112	179	224	3000	327	346	179	153	302	194	289	51	162	150	194	194	194	154	179	179	162	194	180	194	183	182	194	180
P39809	FlgM	72	72	72	72	72	72	72	72	57	69	63	63	63	51	51	51	112	115	85	100	167	167	126	327	3000	173	179	141	170	172	200	51	112	112	146	146	146	102	151	125	112	131	151	151	151	150	167	151
P35536	FliZ	99	99	99	99	99	99	99	99	89	83	106	106	106	96	101	90	103	150	160	230	114	160	71	346	173	3000	194	151	179	203	351	149	189	112	170	170	170	174	171	167	194	291	299	180	179	180	174	179
Q01960	FlhF	99	99	99	99	99	99	99	99	86	93	92	92	92	89	110	89	134	112	99	179	172	327	131	179	179	194	3000	130	193	199	200	131	146	120	184	184	184	131	172	167	147	200	183	172	179	172	172	172
P23449	FliH	85	85	85	85	85	85	85	85	63	60	64	64	64	85	85	63	96	85	108	119	115	104	62	153	141	151	130	3000	224	174	183	86	252	85	170	170	170	332	316	330	281	172	201	233	255	254	317	334
P23451	FliK	86	86	86	86	86	86	86	86	85	78	85	85	85	85	93	61	102	103	103	119	160	149	85	302	170	179	193	224	3000	303	256	182	164	85	238	238	238	180	331	322	204	309	331	331	333	331	331	323
P23452	FliL	122	122	122	122	122	122	122	122	99	85	112	112	112	113	103	114	136	148	99	131	147	151	51	194	172	203	199	174	303	3000	267	212	174	112	272	272	272	180	315	340	211	381	328	314	467	447	452	437
P39739	FliS	100	100	100	100	100	100	100	100	86	86	83	83	83	62	103	65	112	112	245	248	138	141	112	289	200	351	200	183	256	267	3000	51	199	112	373	373	373	170	331	331	308	336	352	331	344	331	335	331
P23454	YlxF	95	95	95	95	95	95	95	95	89	54	104	104	104	89	89	91	103	99	51	119	193	51	51	51	51	149	131	86	182	212	51	3000	148	83	186	186	186	147	206	205	154	200	190	206	201	204	201	206
P24073	FliY	99	99	99	99	99	99	99	99	86	86	86	86	86	85	97	89	112	112	112	163	142	136	101	162	112	189	146	252	164	174	199	148	3000	3000	180	180	180	347	201	321	341	194	252	201	201	252	201	341
P40403	CheC	103	103	103	103	103	103	103	103	85	89	208	208	208	85	62	140	140	663	112	173	169	158	187	150	112	112	120	85	85	112	112	83	3000	3000	108	108	108	85	90	99	92	103	108	99	103	102	103	103
O34366	yvzB	122	122	122	122	122	122	122	122	112	103	89	89	89	101	130	130	129	115	103	204	119	148	86	194	146	170	184	170	238	272	373	186	180	108	3000	3000	3000	194	329	312	307	317	309	314	319	318	317	312
P02968	Hag	122	122	122	122	122	122	122	122	112	103	89	89	89	101	130	130	129	115	103	204	119	148	86	194	146	170	184	170	238	272	373	186	180	108	3000	3000	3000	194	329	312	307	317	309	314	319	318	317	312
P96501	FlgL	122	122	122	122	122	122	122	122	112	103	89	89	89	101	130	130	129	115	103	204	119	148	86	194	146	170	184	170	238	272	373	186	180	108	3000	3000	3000	194	329	312	307	317	309	314	319	318	317	312
P23445	FliI	86	86	86	86	86	86	86	86	83	68	72	72	72	79	93	83	96	89	103	115	99	102	63	154	102	174	131	332	180	180	170	147	347	85	194	194	194	3000	579	542	605	195	491	407	549	574	570	573
P23447	FliF	94	94	94	94	94	94	94	94	86	85	83	83	83	85	103	85	103	109	123	164	116	132	83	179	151	171	172	316	331	315	331	206	201	90	329	329	329	579	3000	1685	563	561	492	548	634	631	634	678
P35620	FlhA	92	92	92	92	92	92	92	92	86	85	83	83	83	79	97	85	100	104	128	164	116	132	85	179	125	167	167	330	322	340	331	205	321	99	312	312	312	542	1685	3000	589	634	507	548	551	576	602	648
P35538	FlhB	89	89	89	89	89	89	89	89	85	83	85	85	85	85	93	85	99	103	108	146	102	104	72	162	112	194	147	281	204	211	308	154	341	92	307	307	307	605	563	589	3000	444	493	541	541	413	541	693
P23448	FliG	100	100	100	100	100	100	100	100	89	86	86	86	86	89	100	89	103	112	191	235	118	141	85	194	131	291	200	172	309	381	336	200	194	103	317	317	317	195	561	634	444	3000	817	548	545	548	551	548
P23453	FliM	97	97	97	97	97	97	97	97	86	85	86	86	86	89	97	87	112	146	120	194	117	136	85	180	151	299	183	201	331	328	352	190	252	108	309	309	309	491	492	507	493	817	3000	715	749	758	607	553
P23455	FlgD	100	100	100	100	100	100	100	100	89	85	85	85	85	86	97	89	109	108	119	194	119	115	84	194	151	180	172	233	331	314	331	206	201	99	314	314	314	407	548	548	541	548	715	3000	948	1078	674	748
P24500	FlgB	91	91	91	91	91	91	91	91	85	83	83	83	83	85	93	85	102	108	132	179	119	138	84	183	151	179	179	255	333	467	344	201	201	103	319	319	319	549	634	551	541	545	749	948	3000	1597	1335	1217
P24501	FlgC	95	95	95	95	95	95	95	95	86	85	85	85	85	85	93	85	102	109	128	164	121	132	84	182	150	180	172	254	331	447	331	204	252	102	318	318	318	574	631	576	413	548	758	1078	1597	3000	1727	1186
P24502	FliE	94	94	94	94	94	94	94	94	86	83	85	85	85	85	93	85	103	110	128	172	121	132	84	194	167	174	172	317	331	452	335	201	201	103	317	317	317	570	634	602	541	551	607	674	1335	1727	3000	1168
P35528	FliP	92	92	92	92	92	92	92	92	86	83	85	85	85	85	93	85	103	112	128	172	121	136	85	180	151	179	172	334	323	437	331	206	341	103	312	312	312	573	678	648	693	548	553	748	1217	1186	1168	3000
P35537	FliR	91	91	91	91	91	91	91	91	86	83	83	83	83	85	93	85	102	109	128	171	119	135	84	182	151	194	172	215	331	438	332	200	328	102	312	312	312	1128	826	648	566	548	545	735	1161	1200	1116	3000
P35535	FliQ	94	94	94	94	94	94	94	94	86	85	85	85	85	85	94	86	108	112	128	164	121	134	84	179	152	293	173	183	323	465	308	199	340	103	308	308	308	573	645	633	541	548	1056	723	1151	1179	1587	2893
P23446	FlgG	89	89	89	89	89	89	89	89	85	83	85	85	85	72	89	85	97	112	190	201	158	150	86	186	151	163	167	233	223	256	269	250	201	121	317	317	317	202	396	434	369	310	434	406	498	540	677	633
P39752	FlhO	89	89	89	89	89	89	89	89	85	83	85	85	85	72	89	85	97	112	190	201	158	150	86	186	151	163	167	233	223	256	269	250	201	121	317	317	317	202	396	434	369	310	434	406	498	540	677	633
P39753	FlhP	89	89	89	89	89	89	89	89	85	83	85	85	85	72	89	85	97	112	190	201	158	150	86	186	151	163	167	233	223	256	269	250	201	121	317	317	317	202	396	434	369	310	434	406	498	540	677	633
P39810	FlgK	96	96	96	96	96	96	96	96	89	86	85	85	85	85	94	87	102	108	128	194	121	132	108	194	150	157	172	234	301	303	319	216	194	108	331	331	331	252	434	518	340	315	466	736	541	541	687	622
P28611	MotA	112	112	112	112	112	112	112	112	103	85	85	85	85	89	97	90	114	110	102	115	112	106	58	173	194	163	167	201	211	290	213	162	174	103	307	307	307	252	331	331	270	345	331	331	429	332	331	331
P39063	ytxD	112	112	112	112	112	112	112	112	103	85	85	85	85	89	97	90	114	110	102	115	112	106	58	173	194	163	167	201	211	290	213	162	174	103	307	307	307	252	331	331	270	345	331	331	429	332	331	331
P28612	MotB	99	99	99	99	99	99	99	99	85	79	85	85	85	85	85	85	111	89	85	112	103	86	51	150	151	130	147	145	183	208	164	121	131	86	180	180	180	130	243	208	147	195	200	206	245	206	243	243
P39064	YtxE	99	99	99	99	99	99	99	99	85	79	85	85	85	85	85	85	111	89	85	112	103	86	51	150	151	130	147	145	183	208	164	121	131	86	180	180	180	130	243	208	147	195	200	206	245	206	243	243
O06484	YfnF	51	51	51	51	51	51	51	51	51	51	51	51	51	51	51	51	51	51	51	51	51	51	51	51	51	51	51	51	51	51	51	51	51	51	51	51	51	51	51	51	51	51	51	51	51	51	51	51
O31542	YfnD	51	51	51	51	51	51	51	51	51	51	51	51	51	51	51	51	51	51	51	51	51	51	51	51	51	51	51	51	51	51	51	51	51	51	51	51	51	51	51	51	51	51	51	51	51	51	51	51
P25148	GspA	51	51	51	51	51	51	51	51	51	51	51	51	51	51	51	51	51	51	51	51	51	51	51	51	51	51	51	51	51	51	51	51	51	51	51	51	51	51	51	51	51	51	51	51	51	51	51	51
O31433	YbdK	99	99	99	99	99	99	99	99	86	99	59	59	59	106	120	148	99	59	51	51	51	51	51	51	51	51	51	51	51	51	51	51	51	51	61	61	61	51	51	51	51	51	51	51	51	51	51	51
O32193	CssS	164	164	164	164	164	164	164	164	186	148	109	109	109	166	148	199	106	56	51	51	51	51	51	51	51	51	51	51	51	51	51	51	51	51	79	79	79	51	51	51	51	51	51	51	51	51	51	51
O35014	YkuL	93	93	93	93	93	93	93	93	78	57	57	57	57	51	73	57	72	51	51	76	76	54	51	56	57	84	59	51	76	86	86	51	89	54	92	92	92	57	84	85	59	85	85	85	85	84	85	85
P54595	YhcK	225	225	225	225	225	225	225	225	148	157	130	130	130	156	174	167	157	110	51	66	75	60	51	54	51	60	74	51	74	89	85	54	85	66	93	93	93	57	83	79	60	85	85	85	79	83	83	79
P96585	YdaK	225	225	225	225	225	225	225	225	148	157	130	130	130	156	174	167	157	110	51	66	75	60	51	54	51	60	74	51	74	89	85	54	85	66	93	93	93	57	83	79	60	85	85	85	79	83	83	79
O31824	NrnB	80	80	80	80	80	80	80	80	63	51	51	51	51	51	51	51	74	51	51	114	51	51	51	51	51	51	54	51	51	51	51	92	51	51	80	80	80	51	51	51	51	51	51	51	51	51	51	51
P25956	ComGD	51	51	51	51	51	51	51	51	51	51	51	51	51	51	51	51	51	51	51	51	51	51	51	51	51	51	51	51	51	51	51	51	51	51	51	51	51	51	51	51	51	51	51	51	51	51	51	51
P38491	YpfA	85	85	85	85	85	85	85	85	78	85	85	85	85	85	85	51	85	143	106	85	98	102	85	104	155	104	86	72	102	85	100	51	85	85	85	85	85	85	86	86	85	97	96	86	86	85	86	86
P39738	FliD	67	67	67	67	67	67	67	67	63	72	51	51	51	51	85	51	85	74	65	85	64	90	65	110	88	71	102	51	103	64	143	51	85	65	117	117	117	86	119	110	76	115	116	115	115	115	115	115
P40742	YlxH	51	51	51	51	51	51	51	51	51	51	51	51	51	51	51	51	89	109	51	68	51	71	52	99	65	54	141	76	64	90	99	51	108	99	99	99	99	85	99	108	98	130	97	99	98	98	99	99
P39625	SpsE	99	99	99	99	99	99	99	99	99	107	83	83	83	83	103	86	96	86	51	96	114	95	86	83	51	53	108	51	65	85	86	86	92	89	115	115	115	59	85	84	65	85	83	85	65	85	81	63
P39627	SpsG	93	93	93	93	93	93	93	93	58	95	80	80	80	56	59	58	85	77	51	96	96	93	85	59	51	57	93	51	70	79	78	89	89	95	93	93	93	54	66	59	59	78	79	79	66	79	70	59
O34720	YjgC	51	51	51	51	51	51	51	51	51	51	51	51	51	51	51	51	51	51	51	51	51	51	51	51	51	51	51	51	51	51	51	51	51	51	51	51	51	51	51	51	51	51	51	51	51	51	51	51
Q795Y4	YrhE	51	51	51	51	51	51	51	51	51	51	51	51	51	51	51	51	51	51	51	51	51	51	51	51	51	51	51	51	51	51	51	51	51	51	51	51	51	51	51	51	51	51	51	51	51	51	51	51
[truncated: 27 more columns]

## Sheet: Metadata
Uniprot ID	Node Label	Locus Tag	BRITE Category	Evidence	Reference	Module (SD50)	Module (SD300)	Module (SD1000)	Gene names	Protein names	Gene ontology (biological process)	Cross-reference (KEGG)	Cross-reference (Pfam)	EnsemblBacteria transcript	Cross-reference (BioCyc)
P39217	TlpB	BSU31230	MCPs	In BRITE		Directed motility	Chemotaxis signaling	Chemoreception	tlpB BSU31230	Methyl-accepting chemotaxis protein TlpB	chemotaxis [GO:0006935]; signal transduction [GO:0007165]	bsu:BSU31230;	PF02743;PF00672;PF00015;	CAB15101;	BSUB:BSU31230-MONOMER;
P54576	McpC	BSU13950	MCPs	In BRITE		Directed motility	Chemotaxis signaling	Chemoreception	mcpC prg71 BSU13950	Methyl-accepting chemotaxis protein McpC	positive chemotaxis [GO:0050918]; signal transduction [GO:0007165]	bsu:BSU13950;	PF02743;PF00672;PF00015;	CAB13268;	BSUB:BSU13950-MONOMER;
P39216	TlpA	BSU31250	MCPs	In BRITE		Directed motility	Chemotaxis signaling	Chemoreception	tlpA BSU31250	Methyl-accepting chemotaxis protein TlpA	chemotaxis [GO:0006935]; signal transduction [GO:0007165]	bsu:BSU31250;	PF02743;PF00672;PF00015;	CAB15103;	BSUB:BSU31250-MONOMER;
O06477	YfmS	BSU07360	-	Novel		Directed motility	Chemotaxis signaling	Chemoreception	yfmS BSU07360	Putative sensory transducer protein YfmS (Methyl-accepting chemotaxis protein)	signal transduction [GO:0007165]	bsu:BSU07360;	PF00015;	CAB12555;	BSUB:BSU07360-MONOMER;
O07621	HemAT	BSU10380	MCPs	In BRITE		Directed motility	Chemotaxis signaling	Chemoreception	hemAT yhfV BSU10380	Heme-based aerotactic transducer HemAT	aerotaxis [GO:0009454]; signal transduction [GO:0007165]	bsu:BSU10380;	PF00015;	CAB12878;	BSUB:BSU10380-MONOMER;
O32239	YvaQ	BSU33690	MCPs	In BRITE		Directed motility	Chemotaxis signaling	Chemoreception	yvaQ BSU33690	Putative sensory transducer protein YvaQ (Methyl-accepting chemotaxis protein)	chemotaxis [GO:0006935]; signal transduction [GO:0007165]	bsu:BSU33690;	PF12729;PF00672;PF00015;	CAB15374;	BSUB:BSU33690-MONOMER;
P39214	McpA	BSU31240	MCPs	In BRITE		Directed motility	Chemotaxis signaling	Chemoreception	mcpA BSU31240	Methyl-accepting chemotaxis protein McpA (H1)	chemotaxis [GO:0006935]; signal transduction [GO:0007165]	bsu:BSU31240;	PF02743;PF00672;PF00015;	CAB15102;	BSUB:BSU31240-MONOMER;
P39215	McpB	BSU31260	MCPs	In BRITE		Directed motility	Chemotaxis signaling	Chemoreception	mcpB BSU31260	Methyl-accepting chemotaxis protein McpB (H3)	chemotaxis [GO:0006935]; signal transduction [GO:0007165]	bsu:BSU31260;	PF02743;PF00672;PF00015;	CAB15104;	BSUB:BSU31260-MONOMER;
C0SP89	YoaH	BSU18610	-	Novel		Directed motility	Chemotaxis signaling	Chemoreception	yoaH BSU18610	Putative methyl-accepting chemotaxis protein YoaH	chemotaxis [GO:0006935]; signal transduction [GO:0007165]	bsu:BSU18610;	PF05227;PF00672;PF00015;	CAB13753;	BSUB:BSU18610-MONOMER;
P39209	TlpC	BSU03440	MCPs	In BRITE		Directed motility	Chemotaxis signaling	Chemoreception	tlpC BSU03440	Methyl-accepting chemotaxis protein TlpC	chemotaxis [GO:0006935]; signal transduction [GO:0007165]	bsu:BSU03440;	PF00672;PF00015;PF17202;	CAB12138;	BSUB:BSU03440-MONOMER;
P24072	CheY	BSU16330	Two component system proteins	In BRITE		Directed motility	Chemotaxis signaling	Chemotransmission	cheY cheB BSU16330	Chemotaxis protein CheY	bacterial-type flagellum-dependent swarming motility [GO:0071978]; chemotaxis [GO:0006935]; phosphorelay signal transduction system [GO:0000160]	bsu:BSU16330;	PF00072;	CAB13506;	BSUB:BSU16330-MONOMER;
P45709	CcdB	BSU17940	Two component system proteins	In BRITE		Directed motility	Chemotaxis signaling	Chemotransmission	ccdB yneI yoxH BSU17940	Protein CcdB	phosphorelay signal transduction system [GO:0000160]	bsu:BSU17940;	PF00072;	CAB13678;	BSUB:BSU17940-MONOMER;
Q05522	CheB	BSU16420	Two component system proteins	In BRITE		Directed motility	Chemotaxis signaling	Chemotransmission	cheB cheL BSU16420	Protein-glutamate methylesterase/protein-glutamine glutaminase (EC 3.1.1.61) (EC 3.5.1.44)	chemotaxis [GO:0006935]; protein deamination [GO:0018277]; protein demethylation [GO:0006482]	bsu:BSU16420;	PF01339;PF00072;	CAB13515;	BSUB:BSU16420-MONOMER;
P31105	CheR	BSU22720	Two component system proteins	In BRITE		Directed motility	Chemotaxis signaling	Chemotransmission	cheR BSU22720	Chemotaxis protein methyltransferase (EC 2.1.1.80)	chemotaxis [GO:0006935]	bsu:BSU22720;	PF01739;PF03705;	CAB14188;	BSUB:BSU22720-MONOMER;
P29072	CheA	BSU16430	Two component system proteins	In BRITE		Directed motility	Chemotaxis signaling	Chemotransmission	cheA cheN BSU16430	Chemotaxis protein CheA (EC 2.7.13.3)	bacterial-type flagellum-dependent swarming motility [GO:0071978]; chemotaxis [GO:0006935]	bsu:BSU16430;	PF01584;PF02895;PF02518;PF01627;PF07194;	CAB13516;	BSUB:BSU16430-MONOMER;
P37599	CheV	BSU14010	Two component system proteins	In BRITE		Directed motility	Chemotaxis signaling	Chemotransmission	cheV BSU14010	Chemotaxis protein CheV	chemotaxis [GO:0006935]; phosphorelay signal transduction system [GO:0000160]	bsu:BSU14010;	PF01584;PF00072;	CAB13274;	BSUB:BSU14010-MONOMER;
P39802	CheW	BSU16440	Two component system proteins	In BRITE		Directed motility	Chemotaxis signaling	Chemotransmission	cheW BSU16440	Chemotaxis protein CheW (Coupling protein CheW)	chemotaxis [GO:0006935]; chemotaxis to oxidizable substrate [GO:0042333]; signal transduction [GO:0007165]	bsu:BSU16440;	PF01584;	CAB13517;	BSUB:BSU16440-MONOMER;
P40404	CheD	BSU16460	Two component system proteins	In BRITE		Directed motility	Chemotaxis signaling	-	cheD ylxK BSU16460	Chemoreceptor glutamine deamidase CheD (EC 3.5.1.44)	chemotaxis [GO:0006935]	bsu:BSU16460;	PF03975;	CAB13519;	BSUB:BSU16460-MONOMER;
C0H412	SwrD	BSU16299	-	Direct	https://pubmed.ncbi.nlm.nih.gov/29061663/	Directed motility	Unannotated_Swrd	Unannotated_Swrd	swrD ylzI BSU16299	Swarming motility protein SwrD	bacterial-type flagellum-dependent swarming motility [GO:0071978]	bsu:BSU16299;	PF06289;	CAX52619;	BSUB:BSU16299-MONOMER;
P96503	FliW	BSU35380	Chaperones	In BRITE		Directed motility	Unannotated_Swrd	Unannotated_Swrd	fliW yviF BSU35380	Flagellar assembly factor FliW	bacterial-type flagellum assembly [GO:0044780]; bacterial-type flagellum-dependent swarming motility [GO:0071978]; positive regulation of bacterial-type flagellum assembly [GO:1902210]; positive regulation of translation [GO:0045727]; regulation of bacterial-type flagellum-dependent cell motility [GO:1902021]	bsu:BSU35380;	PF02623;	CAB15555;	BSUB:BSU35380-MONOMER;
O34867	YlqH	BSU16080	-	-		Directed motility	Unannotated_Flag	-	ylqH BSU16080	Uncharacterized protein YlqH	protein secretion [GO:0009306]	bsu:BSU16080;	PF01312;	CAB13481;	BSUB:BSU16080-MONOMER;
P39737	FlaG	BSU35350	Rod,hook and filament	In BRITE		Directed motility	Unannotated_Flag	-	yvyC yviH BSU35350	Uncharacterized protein YvyC (ORF 99)		bsu:BSU35350;	PF03646;	CAB15552;	BSUB:BSU35350-MONOMER;
P37539	YaaR	BSU00300	-	Novel		Directed motility	-	-	yaaR BSU00300	Uncharacterized protein YaaR		bsu:BSU00300;	PF03885;	CAB11806;	BSUB:BSU00300-MONOMER;
P20487	FliJ	BSU16250	Chaperones	In BRITE		Directed motility	Flagellum	-	fliJ cheF BSU16250	Flagellar FliJ protein (Chemotaxis CheF protein)	bacterial-type flagellum assembly [GO:0044780]; bacterial-type flagellum-dependent swarming motility [GO:0071978]; chemotaxis [GO:0006935]; protein transport [GO:0015031]	bsu:BSU16250;	PF02050;	CAB13498;	BSUB:BSU16250-MONOMER;
P39809	FlgM	BSU35430	Regulation	In BRITE		Directed motility	Flagellum	-	flgM BSU35430	Negative regulator of flagellin synthesis (Anti-sigma-D factor)	bacterial-type flagellum organization [GO:0044781]; negative regulation of transcription, DNA-templated [GO:0045892]	bsu:BSU35430;	PF04316;	CAB15560;	BSUB:BSU35430-MONOMER;
P35536	FliZ	BSU16340	Type-III secretion	In BRITE		Directed motility	Flagellum	-	fliZ cheA BSU16340	Flagellar biosynthetic protein FliZ	bacterial-type flagellum organization [GO:0044781]	bsu:BSU16340;	PF04347;	CAB13507;	BSUB:BSU16340-MONOMER;
Q01960	FlhF	BSU16400	Regulation	In BRITE		Directed motility	Unannotated_Flag	-	flhF BSU16400	Flagellar biosynthesis protein FlhF (Flagella-associated GTP-binding protein)	bacterial-type flagellum organization [GO:0044781]; protein targeting [GO:0006605]; SRP-dependent cotranslational protein targeting to membrane [GO:0006614]	bsu:BSU16400;	PF00448;	CAB13513;	BSUB:BSU16400-MONOMER;
P23449	FliH	BSU16230	Type-III secretion	In BRITE		Directed motility	Flagellum	-	fliH BSU16230	Probable flagellar assembly protein FliH	bacterial-type flagellum assembly [GO:0044780]; bacterial-type flagellum-dependent swarming motility [GO:0071978]; protein transport [GO:0015031]	bsu:BSU16230;	PF02108;	CAB13496;	BSUB:BSU16230-MONOMER;
P23451	FliK	BSU16270	Rod,hook and filament	In BRITE		Directed motility	Flagellum	-	fliK BSU16270	Probable flagellar hook-length control protein	bacterial-type flagellum assembly [GO:0044780]; bacterial-type flagellum-dependent swarming motility [GO:0071978]	bsu:BSU16270;	PF02120;	CAB13500;	BSUB:BSU16270-MONOMER;
P23452	FliL	BSU16300	Rod,hook and filament	In BRITE		Directed motility	Flagellum	-	fliL BSU16300	Flagellar protein FliL	bacterial-type flagellum-dependent swarming motility [GO:0071978]; chemotaxis [GO:0006935]	bsu:BSU16300;	PF03748;	CAB13503;	BSUB:BSU16300-MONOMER;
P39739	FliS	BSU35330	Chaperones	In BRITE		Directed motility	Flagellum	-	fliS BSU35330	Flagellar secretion chaperone FliS	bacterial-type flagellum assembly [GO:0044780]; bacterial-type flagellum-dependent cell motility [GO:0071973]	bsu:BSU35330;	PF02561;	CAB15550;	BSUB:BSU35330-MONOMER;
P23454	YlxF	BSU16260	-	Novel		Directed motility	-	-	ylxF BSU16260	FlaA locus 22.9 kDa protein (ORF 6)	bacterial-type flagellum organization [GO:0044781]	bsu:BSU16260;	PF03448;	CAB13499;	BSUB:BSU16260-MONOMER;
P24073	FliY	BSU16320	C-ring	In BRITE		Directed motility	Flagellum	CheY-p-hydrolysis	fliY cheD BSU16320	Flagellar motor switch phosphatase FliY (EC 3.-.-.-) (CheY-P phosphatase FliY) (Flagellar motor switch protein FliY)	bacterial-type flagellum assembly [GO:0044780]; bacterial-type flagellum-dependent swarming motility [GO:0071978]; chemotaxis [GO:0006935]; dephosphorylation [GO:0016311]; regulation of bacterial-type flagellum-dependent cell motility [GO:1902021]	bsu:BSU16320;	PF04509;PF01052;	CAB13505;	BSUB:BSU16320-MONOMER;
P40403	CheC	BSU16450	Two component system proteins	In BRITE		Directed motility	Chemotaxis signaling	Chey-p-hydrolysis	cheC ylxJ BSU16450	CheY-P phosphatase CheC (EC 3.-.-.-)	positive chemotaxis [GO:0050918]	bsu:BSU16450;	PF04509;	CAB13518;	BSUB:BSU16450-MONOMER;
O34366	yvzB	BSU35150	-	Direct	https://www.microbiologyresearch.org/content/journal/micro/10.1099/mic.0.021477-0#tab2	Directed motility	Flagellum	Flagellar filament	yvzB BSU35150	Putative flagellin YvzB	bacterial-type flagellum-dependent cell motility [GO:0071973]		PF00700;	CAB15520;	BSUB:BSU35150-MONOMER;
P02968	Hag	BSU35360	Rod,hook and filament	In BRITE		Directed motility	Flagellum	Flagellar filament	hag BSU35360	Flagellin (GSX1) (Hag)	bacterial-type flagellum-dependent cell motility [GO:0071973]	bsu:BSU35360;	PF00700;PF00669;	CAB15553;	BSUB:BSU35360-MONOMER;
P96501	FlgL	BSU35400	Rod,hook and filament	In BRITE		Directed motility	Flagellum	Flagellar filament	flgL yviD BSU35400	Flagellar hook-associated protein 3 (HAP3)	bacterial-type flagellum-dependent cell motility [GO:0071973]	bsu:BSU35400;	PF00700;PF00669;	CAB15557;	BSUB:BSU35400-MONOMER;
P23445	FliI	BSU16240	Type-III secretion	In BRITE		Directed motility	Flagellum	Flagellar proximal basal body	fliI BSU16240	Flagellum-specific ATP synthase (EC 7.1.2.2)	ATP biosynthetic process [GO:0006754]; bacterial-type flagellum assembly [GO:0044780]; bacterial-type flagellum-dependent swarming motility [GO:0071978]; protein secretion by the type III secretion system [GO:0030254]; proton transmembrane transport [GO:1902600]	bsu:BSU16240;	PF00006;PF02874;PF18269;	CAB13497;	BSUB:BSU16240-MONOMER;
P23447	FliF	BSU16210	M,S,P, and L rings	In BRITE		Directed motility	Flagellum	Flagellar basal body base	fliF BSU16210	Flagellar M-ring protein	bacterial-type flagellum assembly [GO:0044780]; bacterial-type flagellum-dependent swarming motility [GO:0071978]	bsu:BSU16210;	PF01514;PF08345;	CAB13494;	BSUB:BSU16210-MONOMER;
P35620	FlhA	BSU16390	Type-III secretion	In BRITE		Directed motility	Flagellum	Flagellar basal body base	flhA BSU16390	Flagellar biosynthesis protein FlhA	bacterial-type flagellum assembly [GO:0044780]; bacterial-type flagellum-dependent swarming motility [GO:0071978]; protein secretion [GO:0009306]	bsu:BSU16390;	PF00771;	CAB13512;	BSUB:BSU16390-MONOMER;
P35538	FlhB	BSU16380	Type-III secretion	In BRITE		Directed motility	Flagellum	-	flhB BSU16380	Flagellar biosynthetic protein FlhB	bacterial-type flagellum assembly [GO:0044780]; bacterial-type flagellum-dependent swarming motility [GO:0071978]; protein secretion [GO:0009306]	bsu:BSU16380;	PF01312;	CAB13511;	BSUB:BSU16380-MONOMER;
P23448	FliG	BSU16220	C-ring	In BRITE		Directed motility	Flagellum	-	fliG BSU16220	Flagellar motor switch protein FliG	bacterial-type flagellum assembly [GO:0044780]; bacterial-type flagellum-dependent cell motility [GO:0071973]; bacterial-type flagellum-dependent swarming motility [GO:0071978]; chemotaxis [GO:0006935]	bsu:BSU16220;	PF01706;PF14841;PF14842;	CAB13495;	BSUB:BSU16220-MONOMER;
P23453	FliM	BSU16310	C-ring	In BRITE		Directed motility	Flagellum	Flagellar proximal basal body	fliM BSU16310	Flagellar motor switch protein FliM	bacterial-type flagellum assembly [GO:0044780]; bacterial-type flagellum-dependent swarming motility [GO:0071978]; positive chemotaxis [GO:0050918]	bsu:BSU16310;	PF02154;PF01052;	CAB13504;	BSUB:BSU16310-MONOMER;
P23455	FlgD	BSU16280	Rod,hook and filament	In BRITE		Directed motility	Flagellum	Flagellar proximal basal body	ylxG BSU16280	FlaA locus uncharacterized protein YlxG (ORF 8)	bacterial-type flagellum-dependent swarming motility [GO:0071978]; bacterial-type flagellum organization [GO:0044781]	bsu:BSU16280;	PF03963;	CAB13501;	BSUB:BSU16280-MONOMER;
P24500	FlgB	BSU16180	Rod,hook and filament	In BRITE		Directed motility	Flagellum	Flagellar proximal basal body	flgB BSU16180	Flagellar basal body rod protein FlgB	bacterial-type flagellum assembly [GO:0044780]; bacterial-type flagellum-dependent swarming motility [GO:0071978]	bsu:BSU16180;	PF00460;	CAB13491;	BSUB:BSU16180-MONOMER;
P24501	FlgC	BSU16190	Rod,hook and filament	In BRITE		Directed motility	Flagellum	Flagellar proximal basal body	flgC BSU16190	Flagellar basal-body rod protein FlgC	bacterial-type flagellum assembly [GO:0044780]; bacterial-type flagellum-dependent swarming motility [GO:0071978]	bsu:BSU16190;	PF00460;PF06429;	CAB13492;	BSUB:BSU16190-MONOMER;
P24502	FliE	BSU16200	Rod,hook and filament	In BRITE		Directed motility	Flagellum	Flagellar proximal basal body	fliE BSU16200	Flagellar hook-basal body complex protein FliE	bacterial-type flagellum assembly [GO:0044780]; bacterial-type flagellum-dependent swarming motility [GO:0071978]	bsu:BSU16200;	PF02049;	CAB13493;	BSUB:BSU16200-MONOMER;
P35528	FliP	BSU16350	Type-III secretion	In BRITE		Directed motility	Flagellum	Flagellar proximal basal body	fliP cheC BSU16350	Flagellar biosynthetic protein FliP	bacterial-type flagellum assembly [GO:0044780]; bacterial-type flagellum-dependent swarming motility [GO:0071978]; protein secretion [GO:0009306]	bsu:BSU16350;	PF00813;	CAB13508;	BSUB:BSU16350-MONOMER;
P35537	FliR	BSU16370	Type-III secretion	In BRITE		Directed motility	Flagellum	Flagellar proximal basal body	fliR BSU16370	Flagellar biosynthetic protein FliR	bacterial-type flagellum assembly [GO:0044780]; bacterial-type flagellum-dependent swarming motility [GO:0071978]; protein targeting [GO:0006605]	bsu:BSU16370;	PF01311;	CAB13510;	BSUB:BSU16370-MONOMER;
P35535	FliQ	BSU16360	Type-III secretion	In BRITE		Directed motility	Flagellum	Flagellar proximal basal body	fliQ BSU16360	Flagellar biosynthetic protein FliQ	bacterial-type flagellum assembly [GO:0044780]; bacterial-type flagellum-dependent swarming motility [GO:0071978]; protein secretion [GO:0009306]	bsu:BSU16360;	PF01313;	CAB13509;	BSUB:BSU16360-MONOMER;
P23446	FlgG	BSU16290	Rod,hook and filament	In BRITE		Directed motility	Flagellum	Flagellar hook and distal basal body	flgG flgE BSU16290	Flagellar basal-body rod protein FlgG (Distal rod protein)	bacterial-type flagellum assembly [GO:0044780]; bacterial-type flagellum-dependent swarming motility [GO:0071978]	bsu:BSU16290;	PF00460;PF06429;	CAB13502;	BSUB:BSU16290-MONOMER;
P39752	FlhO	BSU36400	Rod,hook and filament	In BRITE		Directed motility	Flagellum	Flagellar hook and distal basal body	flhO yvyA BSU36400	Flagellar hook-basal body complex protein FlhO	bacterial-type flagellum-dependent swarming motility [GO:0071978]; bacterial-type flagellum organization [GO:0044781]	bsu:BSU36400;	PF00460;PF06429;	CAB15657;	BSUB:BSU36400-MONOMER;
P39753	FlhP	BSU36390	Rod,hook and filament	In BRITE		Directed motility	Flagellum	Flagellar hook and distal basal body	flhP yvyB BSU36390	Flagellar hook-basal body complex protein FlhP	bacterial-type flagellum-dependent swarming motility [GO:0071978]; bacterial-type flagellum organization [GO:0044781]	bsu:BSU36390;	PF00460;PF06429;	CAB15656;	BSUB:BSU36390-MONOMER;
P39810	FlgK	BSU35410	Rod,hook and filament	In BRITE		Directed motility	Flagellum	Flagellar hook and distal basal body	flgK BSU35410	Flagellar hook-associated protein 1 (HAP1)	bacterial-type flagellum assembly [GO:0044780]; bacterial-type flagellum-dependent cell motility [GO:0071973]	bsu:BSU35410;	PF00460;PF06429;	CAB15558;	BSUB:BSU35410-MONOMER;
P28611	MotA	BSU13690	Motor/switch	In BRITE		Directed motility	Flagellum	Flagellar rotation	motA BSU13690	Motility protein A (Chemotaxis protein MotA)	bacterial-type flagellum-dependent swarming motility [GO:0071978]; chemotaxis [GO:0006935]; ion transport [GO:0006811]	bsu:BSU13690;	PF01618;	CAB13242;	BSUB:BSU13690-MONOMER;
P39063	ytxD	BSU29730	Motor/switch	In BRITE		Directed motility	Flagellum	Flagellar rotation	ytxD BSU29730	Uncharacterized protein YtxD	bacterial-type flagellum-dependent swarming motility [GO:0071978]	bsu:BSU29730;	PF01618;	CAB14951;	BSUB:BSU29730-MONOMER;
P28612	MotB	BSU13680	Motor/switch	In BRITE		Directed motility	Flagellum	Flagellar rotation	motB BSU13680	Motility protein B (Chemotaxis protein MotB)	archaeal or bacterial-type flagellum-dependent cell motility [GO:0097588]; chemotaxis [GO:0006935]	bsu:BSU13680;	PF13677;PF00691;	CAB13241;	BSUB:BSU13680-MONOMER;
P39064	YtxE	BSU29720	Motor/switch	In BRITE		Directed motility	Flagellum	Flagellar rotation	ytxE BSU29720	Uncharacterized protein YtxE		bsu:BSU29720;	PF13677;PF00691;	CAB14950;	BSUB:BSU29720-MONOMER;
O06484	YfnF	BSU07290	-	Novel		Directed motility	Flagellum	Unannotated_GspA	yfnF BSU07290	Uncharacterized protein YfnF		bsu:BSU07290;	PF03407;	CAB12548;	BSUB:BSU07290-MONOMER;
O31542	YfnD	BSU07310	-	Novel		Directed motility	Flagellum	Unannotated_GspA	yfnD BSU07310	Uncharacterized protein YfnD		bsu:BSU07310;	PF03407;	CAB12550;	BSUB:BSU07310-MONOMER;
P25148	GspA	BSU38430	-	Novel		Directed motility	Flagellum	Unannotated_GspA	gspA ywaG BSU38430 ipa-12d	General stress protein A		bsu:BSU38430;	PF01501;	CAB15869;	BSUB:BSU38430-MONOMER;
O31433	YbdK	BSU02010	-	Novel		Directed motility	-	-	ybdK BSU02010	Sensor histidine kinase YbdK (EC 2.7.13.3)		bsu:BSU02010;	PF00672;PF00512;	CAB11995;	BSUB:BSU02010-MONOMER;
O32193	CssS	BSU33020	-	Novel		Directed motility	-	-	cssS yvqB BSU33020	Sensor histidine kinase CssS (EC 2.7.13.3)		bsu:BSU33020;	PF00672;PF02518;PF00512;	CAB15292;	BSUB:BSU33020-MONOMER;
O35014	YkuL	BSU14090	-	Novel		Directed motility	Unannotated_YdaK	Unannotated_YdaK	ykuI BSU14090	Uncharacterized EAL-domain containing protein YkuI		bsu:BSU14090;	PF00563;PF10388;	CAB13282;	BSUB:BSU14090-MONOMER;
P54595	YhcK	BSU09120	-	Direct	https://www.ncbi.nlm.nih.gov/pmc/articles/PMC3807487/	Directed motility	Unannotated_YdaK	Unannotated_YdaK	yhcK BSU09120	Uncharacterized protein YhcK	cell adhesion involved in single-species biofilm formation [GO:0043709]; cell wall organization [GO:0071555]; negative regulation of bacterial-type flagellum-dependent cell motility [GO:1902201]	bsu:BSU09120;	PF07694;PF00990;	CAB12740;	BSUB:BSU09120-MONOMER;
P96585	YdaK	BSU04280	-	Novel		Directed motility	Unannotated_YdaK	Unannotated_YdaK	ydaK BSU04280	Uncharacterized membrane protein YdaK		bsu:BSU04280;	PF00990;	CAB12235;	BSUB:BSU04280-MONOMER;
O31824	NrnB	BSU18200	-	Novel		Directed motility	-	-	nrnB yngD BSU18200	Oligoribonuclease NrnB (EC 3.1.-.-) (NanoRNase B)		bsu:BSU18200;		CAB13703;	BSUB:BSU18200-MONOMER;
P25956	ComGD	BSU24700	-	Novel		Directed motility	-	-	comGD comG4 BSU24700	ComG operon protein 4	establishment of competence for transformation [GO:0030420]; protein secretion by the type II secretion system [GO:0015628]	bsu:BSU24700;	PF07963;	CAB14401;	BSUB:BSU24700-MONOMER;
P38491	YpfA	BSU22910	-	Direct	https://www.ncbi.nlm.nih.gov/pmc/articles/PMC3430322/	Directed motility	-	-	ypfA jofA BSU22910	Uncharacterized protein YpfA		bsu:BSU22910;	PF07238;PF12945;	CAB14207;	BSUB:BSU22910-MONOMER;
P39738	FliD	BSU35340	Rod,hook and filament	In BRITE		Directed motility	-	-	fliD mrgB BSU35340	Flagellar hook-associated protein 2 (HAP2) (Filament cap protein) (Flagellar cap protein)	bacterial-type flagellum-dependent cell motility [GO:0071973]; cell adhesion [GO:0007155]	bsu:BSU35340;	PF07196;PF07195;PF02465;	CAB15551;	BSUB:BSU35340-MONOMER;
P40742	YlxH	BSU16410	Rod,hook and filament	In BRITE		Directed motility	-	-	ylxH BSU16410	Flagellum site-determining protein YlxH	bacterial-type flagellum organization [GO:0044781]; negative regulation of cell division [GO:0051782]	bsu:BSU16410;	PF10609;	CAB13514;	BSUB:BSU16410-MONOMER;
P39625	SpsE	BSU37870	-	Novel		Directed motility	Cell wall biogenesis	-	spsE BSU37870 ipa-67d	Spore coat polysaccharide biosynthesis protein SpsE	carbohydrate biosynthetic process [GO:0016051]; glycosylation [GO:0070085]	bsu:BSU37870;	PF03102;PF08666;	CAB15813;	BSUB:BSU37870-MONOMER;
P39627	SpsG	BSU37850	-	Novel		Directed motility	Cell wall biogenesis	-	spsG spsH BSU37850 ipa-69d/ipa-70d	Spore coat polysaccharide biosynthesis protein SpsG		bsu:BSU37850;	PF04101;	CAB15811;	BSUB:BSU37850-MONOMER;
O34720	YjgC	BSU12160	-	Novel		Directed motility	Formate dehydrogenase	Formate dehydrogenase	yjgC BSU12160	Probable oxidoreductase YjgC (EC 1.-.-.-)	formate metabolic process [GO:0015942]	bsu:BSU12160;	PF12838;PF04879;PF00384;PF01568;PF10588;	CAB13073;	BSUB:BSU12160-MONOMER;
Q795Y4	YrhE	BSU27220	-	Novel		Directed motility	Formate dehydrogenase	Formate dehydrogenase	yrhE BSU27220	Putative formate dehydrogenase YrhE (EC 1.17.1.9)	formate metabolic process [GO:0015942]	bsu:BSU27220;	PF12838;PF04879;PF00384;PF01568;PF10588;	CAB14664;	BSUB:BSU27220-MONOMER;

## Sheet: Module_Designation
Spectral Depth 50			Spectral Depth 300			Spectral Depth 1000
Module: Directed Motility			Module: Chemotaxis signaling			Module: Chemoreception
P39217	TlpB		P39217	TlpB		P39217	TlpB
P54576	McpC		P54576	McpC		P54576	McpC
P39216	TlpA		P39216	TlpA		P39216	TlpA
O06477	YfmS		O06477	YfmS		O06477	YfmS
O07621	HemAT		O07621	HemAT		O07621	HemAT
O32239	YvaQ		O32239	YvaQ		O32239	YvaQ
P39214	McpA		P39214	McpA		P39214	McpA
P39215	McpB		P39215	McpB		P39215	McpB
C0SP89	YoaH		C0SP89	YoaH		C0SP89	YoaH
P39209	TlpC		P39209	TlpC		P39209	TlpC
P24072	CheY		P24072	CheY
P45709	CcdB		P45709	CcdB		Module: Chemotransmission
Q05522	CheB		Q05522	CheB		P24072	CheY
P31105	CheR		P31105	CheR		P45709	CcdB
P29072	CheA		P29072	CheA		Q05522	CheB
P37599	CheV		P37599	CheV		P31105	CheR
P39802	CheW		P39802	CheW		P29072	CheA
P40404	CheD		P40404	CheD		P37599	CheV
C0H412	SwrD					P39802	CheW
P96503	FliW		Module: Unannotated			P40404	CheD
O34867	YlqH		O35014	YkuL
P39737	FlaG		P54595	YhcK
P37539	YaaR		P96585	YdaK		Module: Unannotated
P20487	FliJ					P54595	YhcK
P39809	FlgM		Module: Unannotated			P96585	YdaK
P35536	FliZ		C0H412	SwrD
Q01960	FlhF		P96503	FliW
P23449	FliH					Module: Unannotated
P23451	FliK		Module: Cell wall biogenesis			C0H412	SwrD
P23452	FliL		P39625	SpsE		P96503	FliW
P39739	FliS		P39627	SpsG
P23454	YlxF					Module: CheY-p-hydrolysis
P24073	FliY		Module: Formate dehydrogenase			P24073	FliY
P40403	CheC		O34720	YjgC		P40403	CheC
O34366	YvzB		Q795Y4	YrhE
P02968	Hag					Module: Formate dehydrogenase
P96501	FlgL		Module: Flagellum			O34720	YjgC
P23445	FliI		P20487	FliJ		Q795Y4	YrhE
P23447	FliF		P39809	FlgM
P35620	FlhA		P35536	FliZ		Module: Unannotated
P35538	FlhB		P23449	FliH		O06484	YfnF
P23448	FliG		P23451	FliK		O31542	YfnD
P23453	FliM		P23452	FliL		P25148	GspA
P23455	FlgD		P39739	FliS
P24500	FlgB		P23454	YlxF		Module: Flagellar basal body base
P24501	FlgC		P24073	FliY		P23447	FliF
P24502	FliE		P40403	CheC		P35620	FlhA
P35528	FliP		O34366	YvzB
P35537	FliR		P02968	Hag		Module: Flagellar Rotation
P35535	FliQ		P96501	FlgL		P28611	MotA
P23446	FlgG		P23445	FliI		P39063	YtxD
P39752	FlhO		P23447	FliF		P28612	MotB
P39753	FlhP		P35620	FlhA		P39064	YtxE
P39810	FlgK		P35538	FlhB
P28611	MotA		P23448	FliG		Module: Flagellar hook and distal basal body
P39063	YtxD		P23453	FliM		P23446	FlgG
P28612	MotB		P23455	FlgD		P39752	FlhO
P39064	YtxE		P24500	FlgB		P39753	FlhP
O06484	YfnF		P24501	FlgC		P39810	FlgK
O31542	YfnD		P24502	FliE
P25148	GspA		P35528	FliP		Module: Flagellar filament
O31433	YbdK		P35537	FliR		O34366	YvzB
O32193	CssS		P35535	FliQ		P02968	Hag
O35014	YkuL		P23446	FlgG		P96501	FlgL
P54595	YhcK		P39752	FlhO
P96585	YdaK		P39753	FlhP		Module: Flagellar proximal basal body
O31824	NrnB		P39810	FlgK		P23453	FliM
P25956	ComGD		P28611	MotA		P23455	FlgD
P38491	YpfA		P39063	YtxD		P24500	FlgB
P39738	FliD		P28612	MotB		P24501	FlgC
P40742	YlxH		P39064	YtxE		P24502	FliE
P39625	SpsE		O06484	YfnF		P35528	FliP
P39627	SpsG		O31542	YfnD		P35537	FliR
O34720	YjgC		P25148	GspA		P35535	FliQ
Q795Y4	YrhE
			Module: Unannotated
			O34867	YlqH
			P39737	FlaG
			Q01960	FlhF

## Sheet: SD50
	TlpB	McpC	TlpA	YfmS	HemAT	YvaQ	McpA	McpB	YoaH	TlpC	CheY	CcdB	CheB	CheR	CheA	CheV	CheW	CheD	SwrD	FliW	YlqH	FlaG	YaaR	FliJ	FlgM	FliZ	FlhF	FliH	FliK	FliL	FliS	YlxF	FliY	CheC	yvzB	Hag	FlgL	FliI	FliF	FlhA	FlhB	FliG	FliM	FlgD	FlgB	FlgC	FliE	FliP	FliR
TlpB	1	1	1	1	1	1	1	1	1	1	1	1	1	1	1	1	1	1	1	1	1	1	1	1	1	1	1	1	1	1	1	1	1	1	1	1	1	1	1	1	1	1	1	1	1	1	1	1	1
McpC	1	1	1	1	1	1	1	1	1	1	1	1	1	1	1	1	1	1	1	1	1	1	1	1	1	1	1	1	1	1	1	1	1	1	1	1	1	1	1	1	1	1	1	1	1	1	1	1	1
TlpA	1	1	1	1	1	1	1	1	1	1	1	1	1	1	1	1	1	1	1	1	1	1	1	1	1	1	1	1	1	1	1	1	1	1	1	1	1	1	1	1	1	1	1	1	1	1	1	1	1
YfmS	1	1	1	1	1	1	1	1	1	1	1	1	1	1	1	1	1	1	1	1	1	1	1	1	1	1	1	1	1	1	1	1	1	1	1	1	1	1	1	1	1	1	1	1	1	1	1	1	1
HemAT	1	1	1	1	1	1	1	1	1	1	1	1	1	1	1	1	1	1	1	1	1	1	1	1	1	1	1	1	1	1	1	1	1	1	1	1	1	1	1	1	1	1	1	1	1	1	1	1	1
YvaQ	1	1	1	1	1	1	1	1	1	1	1	1	1	1	1	1	1	1	1	1	1	1	1	1	1	1	1	1	1	1	1	1	1	1	1	1	1	1	1	1	1	1	1	1	1	1	1	1	1
McpA	1	1	1	1	1	1	1	1	1	1	1	1	1	1	1	1	1	1	1	1	1	1	1	1	1	1	1	1	1	1	1	1	1	1	1	1	1	1	1	1	1	1	1	1	1	1	1	1	1
McpB	1	1	1	1	1	1	1	1	1	1	1	1	1	1	1	1	1	1	1	1	1	1	1	1	1	1	1	1	1	1	1	1	1	1	1	1	1	1	1	1	1	1	1	1	1	1	1	1	1
YoaH	1	1	1	1	1	1	1	1	1	1	1	1	1	1	1	1	1	1	1	1	1	1	1	1	1	1	1	1	1	1	1	1	1	1	1	1	1	1	1	1	1	1	1	1	1	1	1	1	1
TlpC	1	1	1	1	1	1	1	1	1	1	1	1	1	1	1	1	1	1	1	1	1	1	1	1	1	1	1	1	1	1	1	1	1	1	1	1	1	1	1	1	1	1	1	1	1	1	1	1	1
CheY	1	1	1	1	1	1	1	1	1	1	1	1	1	1	1	1	1	1	1	1	1	1	1	1	1	1	1	1	1	1	1	1	1	1	1	1	1	1	1	1	1	1	1	1	1	1	1	1	1
CcdB	1	1	1	1	1	1	1	1	1	1	1	1	1	1	1	1	1	1	1	1	1	1	1	1	1	1	1	1	1	1	1	1	1	1	1	1	1	1	1	1	1	1	1	1	1	1	1	1	1
CheB	1	1	1	1	1	1	1	1	1	1	1	1	1	1	1	1	1	1	1	1	1	1	1	1	1	1	1	1	1	1	1	1	1	1	1	1	1	1	1	1	1	1	1	1	1	1	1	1	1
CheR	1	1	1	1	1	1	1	1	1	1	1	1	1	1	1	1	1	1	1	1	1	1	1	1	1	1	1	1	1	1	1	1	1	1	1	1	1	1	1	1	1	1	1	1	1	1	1	1	1
CheA	1	1	1	1	1	1	1	1	1	1	1	1	1	1	1	1	1	1	1	1	1	1	1	1	1	1	1	1	1	1	1	1	1	1	1	1	1	1	1	1	1	1	1	1	1	1	1	1	1
CheV	1	1	1	1	1	1	1	1	1	1	1	1	1	1	1	1	1	1	1	1	1	1	1	1	1	1	1	1	1	1	1	1	1	1	1	1	1	1	1	1	1	1	1	1	1	1	1	1	1
CheW	1	1	1	1	1	1	1	1	1	1	1	1	1	1	1	1	1	1	1	1	1	1	1	1	1	1	1	1	1	1	1	1	1	1	1	1	1	1	1	1	1	1	1	1	1	1	1	1	1
CheD	1	1	1	1	1	1	1	1	1	1	1	1	1	1	1	1	1	1	1	1	1	1	1	1	1	1	1	1	1	1	1	1	1	1	1	1	1	1	1	1	1	1	1	1	1	1	1	1	1
SwrD	1	1	1	1	1	1	1	1	1	1	1	1	1	1	1	1	1	1	1	1	1	1	1	1	1	1	1	1	1	1	1	1	1	1	1	1	1	1	1	1	1	1	1	1	1	1	1	1	1
FliW	1	1	1	1	1	1	1	1	1	1	1	1	1	1	1	1	1	1	1	1	1	1	1	1	1	1	1	1	1	1	1	1	1	1	1	1	1	1	1	1	1	1	1	1	1	1	1	1	1
YlqH	1	1	1	1	1	1	1	1	1	1	1	1	1	1	1	1	1	1	1	1	1	1	1	1	1	1	1	1	1	1	1	1	1	1	1	1	1	1	1	1	1	1	1	1	1	1	1	1	1
FlaG	1	1	1	1	1	1	1	1	1	1	1	1	1	1	1	1	1	1	1	1	1	1	1	1	1	1	1	1	1	1	1	1	1	1	1	1	1	1	1	1	1	1	1	1	1	1	1	1	1
YaaR	1	1	1	1	1	1	1	1	1	1	1	1	1	1	1	1	1	1	1	1	1	1	1	1	1	1	1	1	1	1	1	1	1	1	1	1	1	1	1	1	1	1	1	1	1	1	1	1	1
FliJ	1	1	1	1	1	1	1	1	1	1	1	1	1	1	1	1	1	1	1	1	1	1	1	1	1	1	1	1	1	1	1	1	1	1	1	1	1	1	1	1	1	1	1	1	1	1	1	1	1
FlgM	1	1	1	1	1	1	1	1	1	1	1	1	1	1	1	1	1	1	1	1	1	1	1	1	1	1	1	1	1	1	1	1	1	1	1	1	1	1	1	1	1	1	1	1	1	1	1	1	1
FliZ	1	1	1	1	1	1	1	1	1	1	1	1	1	1	1	1	1	1	1	1	1	1	1	1	1	1	1	1	1	1	1	1	1	1	1	1	1	1	1	1	1	1	1	1	1	1	1	1	1
FlhF	1	1	1	1	1	1	1	1	1	1	1	1	1	1	1	1	1	1	1	1	1	1	1	1	1	1	1	1	1	1	1	1	1	1	1	1	1	1	1	1	1	1	1	1	1	1	1	1	1
FliH	1	1	1	1	1	1	1	1	1	1	1	1	1	1	1	1	1	1	1	1	1	1	1	1	1	1	1	1	1	1	1	1	1	1	1	1	1	1	1	1	1	1	1	1	1	1	1	1	1
FliK	1	1	1	1	1	1	1	1	1	1	1	1	1	1	1	1	1	1	1	1	1	1	1	1	1	1	1	1	1	1	1	1	1	1	1	1	1	1	1	1	1	1	1	1	1	1	1	1	1
FliL	1	1	1	1	1	1	1	1	1	1	1	1	1	1	1	1	1	1	1	1	1	1	1	1	1	1	1	1	1	1	1	1	1	1	1	1	1	1	1	1	1	1	1	1	1	1	1	1	1
FliS	1	1	1	1	1	1	1	1	1	1	1	1	1	1	1	1	1	1	1	1	1	1	1	1	1	1	1	1	1	1	1	1	1	1	1	1	1	1	1	1	1	1	1	1	1	1	1	1	1
YlxF	1	1	1	1	1	1	1	1	1	1	1	1	1	1	1	1	1	1	1	1	1	1	1	1	1	1	1	1	1	1	1	1	1	1	1	1	1	1	1	1	1	1	1	1	1	1	1	1	1
FliY	1	1	1	1	1	1	1	1	1	1	1	1	1	1	1	1	1	1	1	1	1	1	1	1	1	1	1	1	1	1	1	1	1	1	1	1	1	1	1	1	1	1	1	1	1	1	1	1	1
CheC	1	1	1	1	1	1	1	1	1	1	1	1	1	1	1	1	1	1	1	1	1	1	1	1	1	1	1	1	1	1	1	1	1	1	1	1	1	1	1	1	1	1	1	1	1	1	1	1	1
yvzB	1	1	1	1	1	1	1	1	1	1	1	1	1	1	1	1	1	1	1	1	1	1	1	1	1	1	1	1	1	1	1	1	1	1	1	1	1	1	1	1	1	1	1	1	1	1	1	1	1
Hag	1	1	1	1	1	1	1	1	1	1	1	1	1	1	1	1	1	1	1	1	1	1	1	1	1	1	1	1	1	1	1	1	1	1	1	1	1	1	1	1	1	1	1	1	1	1	1	1	1
FlgL	1	1	1	1	1	1	1	1	1	1	1	1	1	1	1	1	1	1	1	1	1	1	1	1	1	1	1	1	1	1	1	1	1	1	1	1	1	1	1	1	1	1	1	1	1	1	1	1	1
FliI	1	1	1	1	1	1	1	1	1	1	1	1	1	1	1	1	1	1	1	1	1	1	1	1	1	1	1	1	1	1	1	1	1	1	1	1	1	1	1	1	1	1	1	1	1	1	1	1	1
FliF	1	1	1	1	1	1	1	1	1	1	1	1	1	1	1	1	1	1	1	1	1	1	1	1	1	1	1	1	1	1	1	1	1	1	1	1	1	1	1	1	1	1	1	1	1	1	1	1	1
FlhA	1	1	1	1	1	1	1	1	1	1	1	1	1	1	1	1	1	1	1	1	1	1	1	1	1	1	1	1	1	1	1	1	1	1	1	1	1	1	1	1	1	1	1	1	1	1	1	1	1
FlhB	1	1	1	1	1	1	1	1	1	1	1	1	1	1	1	1	1	1	1	1	1	1	1	1	1	1	1	1	1	1	1	1	1	1	1	1	1	1	1	1	1	1	1	1	1	1	1	1	1
FliG	1	1	1	1	1	1	1	1	1	1	1	1	1	1	1	1	1	1	1	1	1	1	1	1	1	1	1	1	1	1	1	1	1	1	1	1	1	1	1	1	1	1	1	1	1	1	1	1	1
FliM	1	1	1	1	1	1	1	1	1	1	1	1	1	1	1	1	1	1	1	1	1	1	1	1	1	1	1	1	1	1	1	1	1	1	1	1	1	1	1	1	1	1	1	1	1	1	1	1	1
FlgD	1	1	1	1	1	1	1	1	1	1	1	1	1	1	1	1	1	1	1	1	1	1	1	1	1	1	1	1	1	1	1	1	1	1	1	1	1	1	1	1	1	1	1	1	1	1	1	1	1
FlgB	1	1	1	1	1	1	1	1	1	1	1	1	1	1	1	1	1	1	1	1	1	1	1	1	1	1	1	1	1	1	1	1	1	1	1	1	1	1	1	1	1	1	1	1	1	1	1	1	1
FlgC	1	1	1	1	1	1	1	1	1	1	1	1	1	1	1	1	1	1	1	1	1	1	1	1	1	1	1	1	1	1	1	1	1	1	1	1	1	1	1	1	1	1	1	1	1	1	1	1	1
FliE	1	1	1	1	1	1	1	1	1	1	1	1	1	1	1	1	1	1	1	1	1	1	1	1	1	1	1	1	1	1	1	1	1	1	1	1	1	1	1	1	1	1	1	1	1	1	1	1	1
FliP	1	1	1	1	1	1	1	1	1	1	1	1	1	1	1	1	1	1	1	1	1	1	1	1	1	1	1	1	1	1	1	1	1	1	1	1	1	1	1	1	1	1	1	1	1	1	1	1	1
FliR	1	1	1	1	1	1	1	1	1	1	1	1	1	1	1	1	1	1	1	1	1	1	1	1	1	1	1	1	1	1	1	1	1	1	1	1	1	1	1	1	1	1	1	1	1	1	1	1	1
FliQ	1	1	1	1	1	1	1	1	1	1	1	1	1	1	1	1	1	1	1	1	1	1	1	1	1	1	1	1	1	1	1	1	1	1	1	1	1	1	1	1	1	1	1	1	1	1	1	1	1
FlgG	1	1	1	1	1	1	1	1	1	1	1	1	1	1	1	1	1	1	1	1	1	1	1	1	1	1	1	1	1	1	1	1	1	1	1	1	1	1	1	1	1	1	1	1	1	1	1	1	1
FlhO	1	1	1	1	1	1	1	1	1	1	1	1	1	1	1	1	1	1	1	1	1	1	1	1	1	1	1	1	1	1	1	1	1	1	1	1	1	1	1	1	1	1	1	1	1	1	1	1	1
FlhP	1	1	1	1	1	1	1	1	1	1	1	1	1	1	1	1	1	1	1	1	1	1	1	1	1	1	1	1	1	1	1	1	1	1	1	1	1	1	1	1	1	1	1	1	1	1	1	1	1
FlgK	1	1	1	1	1	1	1	1	1	1	1	1	1	1	1	1	1	1	1	1	1	1	1	1	1	1	1	1	1	1	1	1	1	1	1	1	1	1	1	1	1	1	1	1	1	1	1	1	1
MotA	1	1	1	1	1	1	1	1	1	1	1	1	1	1	1	1	1	1	1	1	1	1	1	1	1	1	1	1	1	1	1	1	1	1	1	1	1	1	1	1	1	1	1	1	1	1	1	1	1
ytxD	1	1	1	1	1	1	1	1	1	1	1	1	1	1	1	1	1	1	1	1	1	1	1	1	1	1	1	1	1	1	1	1	1	1	1	1	1	1	1	1	1	1	1	1	1	1	1	1	1
MotB	1	1	1	1	1	1	1	1	1	1	1	1	1	1	1	1	1	1	1	1	1	1	1	1	1	1	1	1	1	1	1	1	1	1	1	1	1	1	1	1	1	1	1	1	1	1	1	1	1
YtxE	1	1	1	1	1	1	1	1	1	1	1	1	1	1	1	1	1	1	1	1	1	1	1	1	1	1	1	1	1	1	1	1	1	1	1	1	1	1	1	1	1	1	1	1	1	1	1	1	1
YfnF	1	1	1	1	1	1	1	1	1	1	1	1	1	1	1	1	1	1	1	1	1	1	1	1	1	1	1	1	1	1	1	1	1	1	1	1	1	1	1	1	1	1	1	1	1	1	1	1	1
YfnD	1	1	1	1	1	1	1	1	1	1	1	1	1	1	1	1	1	1	1	1	1	1	1	1	1	1	1	1	1	1	1	1	1	1	1	1	1	1	1	1	1	1	1	1	1	1	1	1	1
GspA	1	1	1	1	1	1	1	1	1	1	1	1	1	1	1	1	1	1	1	1	1	1	1	1	1	1	1	1	1	1	1	1	1	1	1	1	1	1	1	1	1	1	1	1	1	1	1	1	1
YbdK	1	1	1	1	1	1	1	1	1	1	1	1	1	1	1	1	1	1	1	1	1	1	1	1	1	1	1	1	1	1	1	1	1	1	1	1	1	1	1	1	1	1	1	1	1	1	1	1	1
CssS	1	1	1	1	1	1	1	1	1	1	1	1	1	1	1	1	1	1	1	1	1	1	1	1	1	1	1	1	1	1	1	1	1	1	1	1	1	1	1	1	1	1	1	1	1	1	1	1	1
YkuL	1	1	1	1	1	1	1	1	1	1	1	1	1	1	1	1	1	1	1	1	1	1	1	1	1	1	1	1	1	1	1	1	1	1	1	1	1	1	1	1	1	1	1	1	1	1	1	1	1
YhcK	1	1	1	1	1	1	1	1	1	1	1	1	1	1	1	1	1	1	1	1	1	1	1	1	1	1	1	1	1	1	1	1	1	1	1	1	1	1	1	1	1	1	1	1	1	1	1	1	1
YdaK	1	1	1	1	1	1	1	1	1	1	1	1	1	1	1	1	1	1	1	1	1	1	1	1	1	1	1	1	1	1	1	1	1	1	1	1	1	1	1	1	1	1	1	1	1	1	1	1	1
NrnB	1	1	1	1	1	1	1	1	1	1	1	1	1	1	1	1	1	1	1	1	1	1	1	1	1	1	1	1	1	1	1	1	1	1	1	1	1	1	1	1	1	1	1	1	1	1	1	1	1
ComGD	1	1	1	1	1	1	1	1	1	1	1	1	1	1	1	1	1	1	1	1	1	1	1	1	1	1	1	1	1	1	1	1	1	1	1	1	1	1	1	1	1	1	1	1	1	1	1	1	1
YpfA	1	1	1	1	1	1	1	1	1	1	1	1	1	1	1	1	1	1	1	1	1	1	1	1	1	1	1	1	1	1	1	1	1	1	1	1	1	1	1	1	1	1	1	1	1	1	1	1	1
FliD	1	1	1	1	1	1	1	1	1	1	1	1	1	1	1	1	1	1	1	1	1	1	1	1	1	1	1	1	1	1	1	1	1	1	1	1	1	1	1	1	1	1	1	1	1	1	1	1	1
YlxH	1	1	1	1	1	1	1	1	1	1	1	1	1	1	1	1	1	1	1	1	1	1	1	1	1	1	1	1	1	1	1	1	1	1	1	1	1	1	1	1	1	1	1	1	1	1	1	1	1
SpsE	1	1	1	1	1	1	1	1	1	1	1	1	1	1	1	1	1	1	1	1	1	1	1	1	1	1	1	1	1	1	1	1	1	1	1	1	1	1	1	1	1	1	1	1	1	1	1	1	1
SpsG	1	1	1	1	1	1	1	1	1	1	1	1	1	1	1	1	1	1	1	1	1	1	1	1	1	1	1	1	1	1	1	1	1	1	1	1	1	1	1	1	1	1	1	1	1	1	1	1	1
YjgC	1	1	1	1	1	1	1	1	1	1	1	1	1	1	1	1	1	1	1	1	1	1	1	1	1	1	1	1	1	1	1	1	1	1	1	1	1	1	1	1	1	1	1	1	1	1	1	1	1
YrhE	1	1	1	1	1	1	1	1	1	1	1	1	1	1	1	1	1	1	1	1	1	1	1	1	1	1	1	1	1	1	1	1	1	1	1	1	1	1	1	1	1	1	1	1	1	1	1	1	1
[truncated: 26 more columns]

## Sheet: SD300
	TlpB	McpC	TlpA	YfmS	HemAT	YvaQ	McpA	McpB	YoaH	TlpC	CheY	CcdB	CheB	CheR	CheA	CheV	CheW	CheD	SwrD	FliW	YlqH	FlaG	YaaR	FliJ	FlgM	FliZ	FlhF	FliH	FliK	FliL	FliS	YlxF	FliY	CheC	yvzB	Hag	FlgL	FliI	FliF	FlhA	FlhB	FliG	FliM	FlgD	FlgB	FlgC	FliE	FliP	FliR
TlpB	1	1	1	1	1	1	1	1	1	1	0	0	0	0	0	1	1	0	0	0	0	0	0	0	0	0	0	0	0	0	0	0	0	0	0	0	0	0	0	0	0	0	0	0	0	0	0	0	0
McpC	1	1	1	1	1	1	1	1	1	1	0	0	0	0	0	1	1	0	0	0	0	0	0	0	0	0	0	0	0	0	0	0	0	0	0	0	0	0	0	0	0	0	0	0	0	0	0	0	0
TlpA	1	1	1	1	1	1	1	1	1	1	0	0	0	0	0	1	1	0	0	0	0	0	0	0	0	0	0	0	0	0	0	0	0	0	0	0	0	0	0	0	0	0	0	0	0	0	0	0	0
YfmS	1	1	1	1	1	1	1	1	1	1	0	0	0	0	0	1	1	0	0	0	0	0	0	0	0	0	0	0	0	0	0	0	0	0	0	0	0	0	0	0	0	0	0	0	0	0	0	0	0
HemAT	1	1	1	1	1	1	1	1	1	1	0	0	0	0	0	1	1	0	0	0	0	0	0	0	0	0	0	0	0	0	0	0	0	0	0	0	0	0	0	0	0	0	0	0	0	0	0	0	0
YvaQ	1	1	1	1	1	1	1	1	1	1	0	0	0	0	0	1	1	0	0	0	0	0	0	0	0	0	0	0	0	0	0	0	0	0	0	0	0	0	0	0	0	0	0	0	0	0	0	0	0
McpA	1	1	1	1	1	1	1	1	1	1	0	0	0	0	0	1	1	0	0	0	0	0	0	0	0	0	0	0	0	0	0	0	0	0	0	0	0	0	0	0	0	0	0	0	0	0	0	0	0
McpB	1	1	1	1	1	1	1	1	1	1	0	0	0	0	0	1	1	0	0	0	0	0	0	0	0	0	0	0	0	0	0	0	0	0	0	0	0	0	0	0	0	0	0	0	0	0	0	0	0
YoaH	1	1	1	1	1	1	1	1	1	1	0	0	0	0	0	1	0	0	0	0	0	0	0	0	0	0	0	0	0	0	0	0	0	0	0	0	0	0	0	0	0	0	0	0	0	0	0	0	0
TlpC	1	1	1	1	1	1	1	1	1	1	0	0	0	0	0	0	0	0	0	0	0	0	0	0	0	0	0	0	0	0	0	0	0	0	0	0	0	0	0	0	0	0	0	0	0	0	0	0	0
CheY	0	0	0	0	0	0	0	0	0	0	1	1	1	1	1	1	1	1	0	0	0	0	0	0	0	0	0	0	0	0	0	0	0	0	0	0	0	0	0	0	0	0	0	0	0	0	0	0	0
CcdB	0	0	0	0	0	0	0	0	0	0	1	1	1	1	1	1	1	1	0	0	0	0	0	0	0	0	0	0	0	0	0	0	0	0	0	0	0	0	0	0	0	0	0	0	0	0	0	0	0
CheB	0	0	0	0	0	0	0	0	0	0	1	1	1	1	1	1	1	1	0	0	0	0	0	0	0	0	0	0	0	0	0	0	0	0	0	0	0	0	0	0	0	0	0	0	0	0	0	0	0
CheR	0	0	0	0	0	0	0	0	0	0	1	1	1	1	1	1	1	1	0	0	0	0	0	0	0	0	0	0	0	0	0	0	0	0	0	0	0	0	0	0	0	0	0	0	0	0	0	0	0
CheA	0	0	0	0	0	0	0	0	0	0	1	1	1	1	1	1	1	1	0	0	0	0	0	0	0	0	0	0	0	0	0	0	0	0	0	0	0	0	0	0	0	0	0	0	0	0	0	0	0
CheV	1	1	1	1	1	1	1	1	1	0	1	1	1	1	1	1	1	1	0	0	0	0	0	0	0	0	0	0	0	0	0	0	0	0	0	0	0	0	0	0	0	0	0	0	0	0	0	0	0
CheW	1	1	1	1	1	1	1	1	0	0	1	1	1	1	1	1	1	1	0	0	0	0	0	0	0	0	0	0	0	0	0	0	0	0	0	0	0	0	0	0	0	0	0	0	0	0	0	0	0
CheD	0	0	0	0	0	0	0	0	0	0	1	1	1	1	1	1	1	1	0	0	0	0	0	0	0	0	0	0	0	0	0	0	0	1	0	0	0	0	0	0	0	0	0	0	0	0	0	0	0
SwrD	0	0	0	0	0	0	0	0	0	0	0	0	0	0	0	0	0	0	1	1	0	0	0	0	0	0	0	0	0	0	0	0	0	0	0	0	0	0	0	0	0	0	0	0	0	0	0	0	0
FliW	0	0	0	0	0	0	0	0	0	0	0	0	0	0	0	0	0	0	1	1	0	0	0	0	0	0	0	0	0	0	0	0	0	0	0	0	0	0	0	0	0	0	0	0	0	0	0	0	0
YlqH	0	0	0	0	0	0	0	0	0	0	0	0	0	0	0	0	0	0	0	0	1	1	0	0	0	0	0	0	0	0	0	0	0	0	0	0	0	0	0	0	0	0	0	0	0	0	0	0	0
FlaG	0	0	0	0	0	0	0	0	0	0	0	0	0	0	0	0	0	0	0	0	1	1	0	0	0	0	1	0	0	0	0	0	0	0	0	0	0	0	0	0	0	0	0	0	0	0	0	0	0
YaaR	0	0	0	0	0	0	0	0	0	0	0	0	0	0	0	0	0	0	0	0	0	0	1	0	0	0	0	0	0	0	0	0	0	0	0	0	0	0	0	0	0	0	0	0	0	0	0	0	0
FliJ	0	0	0	0	0	0	0	0	0	0	0	0	0	0	0	0	0	0	0	0	0	0	0	1	1	1	0	0	1	0	0	0	0	0	0	0	0	0	0	0	0	0	0	0	0	0	0	0	0
FlgM	0	0	0	0	0	0	0	0	0	0	0	0	0	0	0	0	0	0	0	0	0	0	0	1	1	0	0	0	0	0	0	0	0	0	0	0	0	0	0	0	0	0	0	0	0	0	0	0	0
FliZ	0	0	0	0	0	0	0	0	0	0	0	0	0	0	0	0	0	0	0	0	0	0	0	1	0	1	0	0	0	0	1	0	0	0	0	0	0	0	0	0	0	0	0	0	0	0	0	0	0
FlhF	0	0	0	0	0	0	0	0	0	0	0	0	0	0	0	0	0	0	0	0	0	1	0	0	0	0	1	0	0	0	0	0	0	0	0	0	0	0	0	0	0	0	0	0	0	0	0	0	0
FliH	0	0	0	0	0	0	0	0	0	0	0	0	0	0	0	0	0	0	0	0	0	0	0	0	0	0	0	1	0	0	0	0	0	0	0	0	0	1	1	1	0	0	0	0	0	0	1	1	0
FliK	0	0	0	0	0	0	0	0	0	0	0	0	0	0	0	0	0	0	0	0	0	0	0	1	0	0	0	0	1	1	0	0	0	0	0	0	0	0	1	1	0	1	1	1	1	1	1	1	1
FliL	0	0	0	0	0	0	0	0	0	0	0	0	0	0	0	0	0	0	0	0	0	0	0	0	0	0	0	0	1	1	0	0	0	0	0	0	0	0	1	1	0	1	1	1	1	1	1	1	1
FliS	0	0	0	0	0	0	0	0	0	0	0	0	0	0	0	0	0	0	0	0	0	0	0	0	0	1	0	0	0	0	1	0	0	0	1	1	1	0	1	1	1	1	1	1	1	1	1	1	1
YlxF	0	0	0	0	0	0	0	0	0	0	0	0	0	0	0	0	0	0	0	0	0	0	0	0	0	0	0	0	0	0	0	1	0	0	0	0	0	0	0	0	0	0	0	0	0	0	0	0	0
FliY	0	0	0	0	0	0	0	0	0	0	0	0	0	0	0	0	0	0	0	0	0	0	0	0	0	0	0	0	0	0	0	0	1	1	0	0	0	1	0	1	1	0	0	0	0	0	0	1	1
CheC	0	0	0	0	0	0	0	0	0	0	0	0	0	0	0	0	0	1	0	0	0	0	0	0	0	0	0	0	0	0	0	0	1	1	0	0	0	0	0	0	0	0	0	0	0	0	0	0	0
yvzB	0	0	0	0	0	0	0	0	0	0	0	0	0	0	0	0	0	0	0	0	0	0	0	0	0	0	0	0	0	0	1	0	0	0	1	1	1	0	1	1	1	1	1	1	1	1	1	1	1
Hag	0	0	0	0	0	0	0	0	0	0	0	0	0	0	0	0	0	0	0	0	0	0	0	0	0	0	0	0	0	0	1	0	0	0	1	1	1	0	1	1	1	1	1	1	1	1	1	1	1
FlgL	0	0	0	0	0	0	0	0	0	0	0	0	0	0	0	0	0	0	0	0	0	0	0	0	0	0	0	0	0	0	1	0	0	0	1	1	1	0	1	1	1	1	1	1	1	1	1	1	1
FliI	0	0	0	0	0	0	0	0	0	0	0	0	0	0	0	0	0	0	0	0	0	0	0	0	0	0	0	1	0	0	0	0	1	0	0	0	0	1	1	1	1	0	1	1	1	1	1	1	1
FliF	0	0	0	0	0	0	0	0	0	0	0	0	0	0	0	0	0	0	0	0	0	0	0	0	0	0	0	1	1	1	1	0	0	0	1	1	1	1	1	1	1	1	1	1	1	1	1	1	1
FlhA	0	0	0	0	0	0	0	0	0	0	0	0	0	0	0	0	0	0	0	0	0	0	0	0	0	0	0	1	1	1	1	0	1	0	1	1	1	1	1	1	1	1	1	1	1	1	1	1	1
FlhB	0	0	0	0	0	0	0	0	0	0	0	0	0	0	0	0	0	0	0	0	0	0	0	0	0	0	0	0	0	0	1	0	1	0	1	1	1	1	1	1	1	1	1	1	1	1	1	1	1
FliG	0	0	0	0	0	0	0	0	0	0	0	0	0	0	0	0	0	0	0	0	0	0	0	0	0	0	0	0	1	1	1	0	0	0	1	1	1	0	1	1	1	1	1	1	1	1	1	1	1
FliM	0	0	0	0	0	0	0	0	0	0	0	0	0	0	0	0	0	0	0	0	0	0	0	0	0	0	0	0	1	1	1	0	0	0	1	1	1	1	1	1	1	1	1	1	1	1	1	1	1
FlgD	0	0	0	0	0	0	0	0	0	0	0	0	0	0	0	0	0	0	0	0	0	0	0	0	0	0	0	0	1	1	1	0	0	0	1	1	1	1	1	1	1	1	1	1	1	1	1	1	1
FlgB	0	0	0	0	0	0	0	0	0	0	0	0	0	0	0	0	0	0	0	0	0	0	0	0	0	0	0	0	1	1	1	0	0	0	1	1	1	1	1	1	1	1	1	1	1	1	1	1	1
FlgC	0	0	0	0	0	0	0	0	0	0	0	0	0	0	0	0	0	0	0	0	0	0	0	0	0	0	0	0	1	1	1	0	0	0	1	1	1	1	1	1	1	1	1	1	1	1	1	1	1
FliE	0	0	0	0	0	0	0	0	0	0	0	0	0	0	0	0	0	0	0	0	0	0	0	0	0	0	0	1	1	1	1	0	0	0	1	1	1	1	1	1	1	1	1	1	1	1	1	1	1
FliP	0	0	0	0	0	0	0	0	0	0	0	0	0	0	0	0	0	0	0	0	0	0	0	0	0	0	0	1	1	1	1	0	1	0	1	1	1	1	1	1	1	1	1	1	1	1	1	1	1
FliR	0	0	0	0	0	0	0	0	0	0	0	0	0	0	0	0	0	0	0	0	0	0	0	0	0	0	0	0	1	1	1	0	1	0	1	1	1	1	1	1	1	1	1	1	1	1	1	1	1
FliQ	0	0	0	0	0	0	0	0	0	0	0	0	0	0	0	0	0	0	0	0	0	0	0	0	0	0	0	0	1	1	1	0	1	0	1	1	1	1	1	1	1	1	1	1	1	1	1	1	1
FlgG	0	0	0	0	0	0	0	0	0	0	0	0	0	0	0	0	0	0	0	0	0	0	0	0	0	0	0	0	0	0	0	0	0	0	1	1	1	0	1	1	1	1	1	1	1	1	1	1	1
FlhO	0	0	0	0	0	0	0	0	0	0	0	0	0	0	0	0	0	0	0	0	0	0	0	0	0	0	0	0	0	0	0	0	0	0	1	1	1	0	1	1	1	1	1	1	1	1	1	1	1
FlhP	0	0	0	0	0	0	0	0	0	0	0	0	0	0	0	0	0	0	0	0	0	0	0	0	0	0	0	0	0	0	0	0	0	0	1	1	1	0	1	1	1	1	1	1	1	1	1	1	1
FlgK	0	0	0	0	0	0	0	0	0	0	0	0	0	0	0	0	0	0	0	0	0	0	0	0	0	0	0	0	1	1	1	0	0	0	1	1	1	0	1	1	1	1	1	1	1	1	1	1	1
MotA	0	0	0	0	0	0	0	0	0	0	0	0	0	0	0	0	0	0	0	0	0	0	0	0	0	0	0	0	0	0	0	0	0	0	1	1	1	0	1	1	0	1	1	1	1	1	1	1	1
ytxD	0	0	0	0	0	0	0	0	0	0	0	0	0	0	0	0	0	0	0	0	0	0	0	0	0	0	0	0	0	0	0	0	0	0	1	1	1	0	1	1	0	1	1	1	1	1	1	1	1
MotB	0	0	0	0	0	0	0	0	0	0	0	0	0	0	0	0	0	0	0	0	0	0	0	0	0	0	0	0	0	0	0	0	0	0	0	0	0	0	0	0	0	0	0	0	0	0	0	0	0
YtxE	0	0	0	0	0	0	0	0	0	0	0	0	0	0	0	0	0	0	0	0	0	0	0	0	0	0	0	0	0	0	0	0	0	0	0	0	0	0	0	0	0	0	0	0	0	0	0	0	0
YfnF	0	0	0	0	0	0	0	0	0	0	0	0	0	0	0	0	0	0	0	0	0	0	0	0	0	0	0	0	0	0	0	0	0	0	0	0	0	0	0	0	0	0	0	0	0	0	0	0	0
YfnD	0	0	0	0	0	0	0	0	0	0	0	0	0	0	0	0	0	0	0	0	0	0	0	0	0	0	0	0	0	0	0	0	0	0	0	0	0	0	0	0	0	0	0	0	0	0	0	0	0
GspA	0	0	0	0	0	0	0	0	0	0	0	0	0	0	0	0	0	0	0	0	0	0	0	0	0	0	0	0	0	0	0	0	0	0	0	0	0	0	0	0	0	0	0	0	0	0	0	0	0
YbdK	0	0	0	0	0	0	0	0	0	0	0	0	0	0	0	0	0	0	0	0	0	0	0	0	0	0	0	0	0	0	0	0	0	0	0	0	0	0	0	0	0	0	0	0	0	0	0	0	0
CssS	0	0	0	0	0	0	0	0	0	0	0	0	0	0	0	0	0	0	0	0	0	0	0	0	0	0	0	0	0	0	0	0	0	0	0	0	0	0	0	0	0	0	0	0	0	0	0	0	0
YkuL	0	0	0	0	0	0	0	0	0	0	0	0	0	0	0	0	0	0	0	0	0	0	0	0	0	0	0	0	0	0	0	0	0	0	0	0	0	0	0	0	0	0	0	0	0	0	0	0	0
YhcK	0	0	0	0	0	0	0	0	0	0	0	0	0	0	0	0	0	0	0	0	0	0	0	0	0	0	0	0	0	0	0	0	0	0	0	0	0	0	0	0	0	0	0	0	0	0	0	0	0
YdaK	0	0	0	0	0	0	0	0	0	0	0	0	0	0	0	0	0	0	0	0	0	0	0	0	0	0	0	0	0	0	0	0	0	0	0	0	0	0	0	0	0	0	0	0	0	0	0	0	0
NrnB	0	0	0	0	0	0	0	0	0	0	0	0	0	0	0	0	0	0	0	0	0	0	0	0	0	0	0	0	0	0	0	0	0	0	0	0	0	0	0	0	0	0	0	0	0	0	0	0	0
ComGD	0	0	0	0	0	0	0	0	0	0	0	0	0	0	0	0	0	0	0	0	0	0	0	0	0	0	0	0	0	0	0	0	0	0	0	0	0	0	0	0	0	0	0	0	0	0	0	0	0
YpfA	0	0	0	0	0	0	0	0	0	0	0	0	0	0	0	0	0	0	0	0	0	0	0	0	0	0	0	0	0	0	0	0	0	0	0	0	0	0	0	0	0	0	0	0	0	0	0	0	0
FliD	0	0	0	0	0	0	0	0	0	0	0	0	0	0	0	0	0	0	0	0	0	0	0	0	0	0	0	0	0	0	0	0	0	0	0	0	0	0	0	0	0	0	0	0	0	0	0	0	0
YlxH	0	0	0	0	0	0	0	0	0	0	0	0	0	0	0	0	0	0	0	0	0	0	0	0	0	0	0	0	0	0	0	0	0	0	0	0	0	0	0	0	0	0	0	0	0	0	0	0	0
SpsE	0	0	0	0	0	0	0	0	0	0	0	0	0	0	0	0	0	0	0	0	0	0	0	0	0	0	0	0	0	0	0	0	0	0	0	0	0	0	0	0	0	0	0	0	0	0	0	0	0
SpsG	0	0	0	0	0	0	0	0	0	0	0	0	0	0	0	0	0	0	0	0	0	0	0	0	0	0	0	0	0	0	0	0	0	0	0	0	0	0	0	0	0	0	0	0	0	0	0	0	0
YjgC	0	0	0	0	0	0	0	0	0	0	0	0	0	0	0	0	0	0	0	0	0	0	0	0	0	0	0	0	0	0	0	0	0	0	0	0	0	0	0	0	0	0	0	0	0	0	0	0	0
YrhE	0	0	0	0	0	0	0	0	0	0	0	0	0	0	0	0	0	0	0	0	0	0	0	0	0	0	0	0	0	0	0	0	0	0	0	0	0	0	0	0	0	0	0	0	0	0	0	0	0
[truncated: 26 more columns]

## Sheet: SD1000
	TlpB	McpC	TlpA	YfmS	HemAT	YvaQ	McpA	McpB	YoaH	TlpC	CheY	CcdB	CheB	CheR	CheA	CheV	CheW	CheD	SwrD	FliW	YlqH	FlaG	YaaR	FliJ	FlgM	FliZ	FlhF	FliH	FliK	FliL	FliS	YlxF	FliY	CheC	yvzB	Hag	FlgL	FliI	FliF	FlhA	FlhB	FliG	FliM	FlgD	FlgB	FlgC	FliE	FliP	FliR
TlpB	1	1	1	1	1	1	1	1	1	1	0	0	0	0	0	0	0	0	0	0	0	0	0	0	0	0	0	0	0	0	0	0	0	0	0	0	0	0	0	0	0	0	0	0	0	0	0	0	0
McpC	1	1	1	1	1	1	1	1	1	1	0	0	0	0	0	0	0	0	0	0	0	0	0	0	0	0	0	0	0	0	0	0	0	0	0	0	0	0	0	0	0	0	0	0	0	0	0	0	0
TlpA	1	1	1	1	1	1	1	1	1	1	0	0	0	0	0	0	0	0	0	0	0	0	0	0	0	0	0	0	0	0	0	0	0	0	0	0	0	0	0	0	0	0	0	0	0	0	0	0	0
YfmS	1	1	1	1	1	1	1	1	1	1	0	0	0	0	0	0	0	0	0	0	0	0	0	0	0	0	0	0	0	0	0	0	0	0	0	0	0	0	0	0	0	0	0	0	0	0	0	0	0
HemAT	1	1	1	1	1	1	1	1	1	1	0	0	0	0	0	0	0	0	0	0	0	0	0	0	0	0	0	0	0	0	0	0	0	0	0	0	0	0	0	0	0	0	0	0	0	0	0	0	0
YvaQ	1	1	1	1	1	1	1	1	1	1	0	0	0	0	0	0	0	0	0	0	0	0	0	0	0	0	0	0	0	0	0	0	0	0	0	0	0	0	0	0	0	0	0	0	0	0	0	0	0
McpA	1	1	1	1	1	1	1	1	1	1	0	0	0	0	0	0	0	0	0	0	0	0	0	0	0	0	0	0	0	0	0	0	0	0	0	0	0	0	0	0	0	0	0	0	0	0	0	0	0
McpB	1	1	1	1	1	1	1	1	1	1	0	0	0	0	0	0	0	0	0	0	0	0	0	0	0	0	0	0	0	0	0	0	0	0	0	0	0	0	0	0	0	0	0	0	0	0	0	0	0
YoaH	1	1	1	1	1	1	1	1	1	0	0	0	0	0	0	0	0	0	0	0	0	0	0	0	0	0	0	0	0	0	0	0	0	0	0	0	0	0	0	0	0	0	0	0	0	0	0	0	0
TlpC	1	1	1	1	1	1	1	1	0	1	0	0	0	0	0	0	0	0	0	0	0	0	0	0	0	0	0	0	0	0	0	0	0	0	0	0	0	0	0	0	0	0	0	0	0	0	0	0	0
CheY	0	0	0	0	0	0	0	0	0	0	1	1	1	1	0	0	1	0	0	0	0	0	0	0	0	0	0	0	0	0	0	0	0	0	0	0	0	0	0	0	0	0	0	0	0	0	0	0	0
CcdB	0	0	0	0	0	0	0	0	0	0	1	1	1	1	0	0	1	0	0	0	0	0	0	0	0	0	0	0	0	0	0	0	0	0	0	0	0	0	0	0	0	0	0	0	0	0	0	0	0
CheB	0	0	0	0	0	0	0	0	0	0	1	1	1	1	0	0	1	0	0	0	0	0	0	0	0	0	0	0	0	0	0	0	0	0	0	0	0	0	0	0	0	0	0	0	0	0	0	0	0
CheR	0	0	0	0	0	0	0	0	0	0	1	1	1	1	0	0	1	0	0	0	0	0	0	0	0	0	0	0	0	0	0	0	0	0	0	0	0	0	0	0	0	0	0	0	0	0	0	0	0
CheA	0	0	0	0	0	0	0	0	0	0	0	0	0	0	1	1	0	0	0	0	0	0	0	0	0	0	0	0	0	0	0	0	0	0	0	0	0	0	0	0	0	0	0	0	0	0	0	0	0
CheV	0	0	0	0	0	0	0	0	0	0	0	0	0	0	1	1	1	0	0	0	0	0	0	0	0	0	0	0	0	0	0	0	0	0	0	0	0	0	0	0	0	0	0	0	0	0	0	0	0
CheW	0	0	0	0	0	0	0	0	0	0	1	1	1	1	0	1	1	0	0	0	0	0	0	0	0	0	0	0	0	0	0	0	0	0	0	0	0	0	0	0	0	0	0	0	0	0	0	0	0
CheD	0	0	0	0	0	0	0	0	0	0	0	0	0	0	0	0	0	1	0	0	0	0	0	0	0	0	0	0	0	0	0	0	0	0	0	0	0	0	0	0	0	0	0	0	0	0	0	0	0
SwrD	0	0	0	0	0	0	0	0	0	0	0	0	0	0	0	0	0	0	1	1	0	0	0	0	0	0	0	0	0	0	0	0	0	0	0	0	0	0	0	0	0	0	0	0	0	0	0	0	0
FliW	0	0	0	0	0	0	0	0	0	0	0	0	0	0	0	0	0	0	1	1	0	0	0	0	0	0	0	0	0	0	0	0	0	0	0	0	0	0	0	0	0	0	0	0	0	0	0	0	0
YlqH	0	0	0	0	0	0	0	0	0	0	0	0	0	0	0	0	0	0	0	0	1	0	0	0	0	0	0	0	0	0	0	0	0	0	0	0	0	0	0	0	0	0	0	0	0	0	0	0	0
FlaG	0	0	0	0	0	0	0	0	0	0	0	0	0	0	0	0	0	0	0	0	0	1	0	0	0	0	0	0	0	0	0	0	0	0	0	0	0	0	0	0	0	0	0	0	0	0	0	0	0
YaaR	0	0	0	0	0	0	0	0	0	0	0	0	0	0	0	0	0	0	0	0	0	0	1	0	0	0	0	0	0	0	0	0	0	0	0	0	0	0	0	0	0	0	0	0	0	0	0	0	0
FliJ	0	0	0	0	0	0	0	0	0	0	0	0	0	0	0	0	0	0	0	0	0	0	0	1	0	0	0	0	0	0	0	0	0	0	0	0	0	0	0	0	0	0	0	0	0	0	0	0	0
FlgM	0	0	0	0	0	0	0	0	0	0	0	0	0	0	0	0	0	0	0	0	0	0	0	0	1	0	0	0	0	0	0	0	0	0	0	0	0	0	0	0	0	0	0	0	0	0	0	0	0
FliZ	0	0	0	0	0	0	0	0	0	0	0	0	0	0	0	0	0	0	0	0	0	0	0	0	0	1	0	0	0	0	0	0	0	0	0	0	0	0	0	0	0	0	0	0	0	0	0	0	0
FlhF	0	0	0	0	0	0	0	0	0	0	0	0	0	0	0	0	0	0	0	0	0	0	0	0	0	0	1	0	0	0	0	0	0	0	0	0	0	0	0	0	0	0	0	0	0	0	0	0	0
FliH	0	0	0	0	0	0	0	0	0	0	0	0	0	0	0	0	0	0	0	0	0	0	0	0	0	0	0	1	0	0	0	0	0	0	0	0	0	0	0	0	0	0	0	0	0	0	0	0	0
FliK	0	0	0	0	0	0	0	0	0	0	0	0	0	0	0	0	0	0	0	0	0	0	0	0	0	0	0	0	1	0	0	0	0	0	0	0	0	0	0	0	0	0	0	0	0	0	0	0	0
FliL	0	0	0	0	0	0	0	0	0	0	0	0	0	0	0	0	0	0	0	0	0	0	0	0	0	0	0	0	0	1	0	0	0	0	0	0	0	0	0	0	0	0	0	0	0	0	0	0	0
FliS	0	0	0	0	0	0	0	0	0	0	0	0	0	0	0	0	0	0	0	0	0	0	0	0	0	0	0	0	0	0	1	0	0	0	0	0	0	0	0	0	0	0	0	0	0	0	0	0	0
YlxF	0	0	0	0	0	0	0	0	0	0	0	0	0	0	0	0	0	0	0	0	0	0	0	0	0	0	0	0	0	0	0	1	0	0	0	0	0	0	0	0	0	0	0	0	0	0	0	0	0
FliY	0	0	0	0	0	0	0	0	0	0	0	0	0	0	0	0	0	0	0	0	0	0	0	0	0	0	0	0	0	0	0	0	1	1	0	0	0	0	0	0	0	0	0	0	0	0	0	0	0
CheC	0	0	0	0	0	0	0	0	0	0	0	0	0	0	0	0	0	0	0	0	0	0	0	0	0	0	0	0	0	0	0	0	1	1	0	0	0	0	0	0	0	0	0	0	0	0	0	0	0
yvzB	0	0	0	0	0	0	0	0	0	0	0	0	0	0	0	0	0	0	0	0	0	0	0	0	0	0	0	0	0	0	0	0	0	0	1	1	1	0	0	0	0	0	0	0	0	0	0	0	0
Hag	0	0	0	0	0	0	0	0	0	0	0	0	0	0	0	0	0	0	0	0	0	0	0	0	0	0	0	0	0	0	0	0	0	0	1	1	1	0	0	0	0	0	0	0	0	0	0	0	0
FlgL	0	0	0	0	0	0	0	0	0	0	0	0	0	0	0	0	0	0	0	0	0	0	0	0	0	0	0	0	0	0	0	0	0	0	1	1	1	0	0	0	0	0	0	0	0	0	0	0	0
FliI	0	0	0	0	0	0	0	0	0	0	0	0	0	0	0	0	0	0	0	0	0	0	0	0	0	0	0	0	0	0	0	0	0	0	0	0	0	1	0	0	0	0	0	0	0	0	0	0	1
FliF	0	0	0	0	0	0	0	0	0	0	0	0	0	0	0	0	0	0	0	0	0	0	0	0	0	0	0	0	0	0	0	0	0	0	0	0	0	0	1	1	0	0	0	0	0	0	0	0	0
FlhA	0	0	0	0	0	0	0	0	0	0	0	0	0	0	0	0	0	0	0	0	0	0	0	0	0	0	0	0	0	0	0	0	0	0	0	0	0	0	1	1	0	0	0	0	0	0	0	0	0
FlhB	0	0	0	0	0	0	0	0	0	0	0	0	0	0	0	0	0	0	0	0	0	0	0	0	0	0	0	0	0	0	0	0	0	0	0	0	0	0	0	0	1	0	0	0	0	0	0	0	0
FliG	0	0	0	0	0	0	0	0	0	0	0	0	0	0	0	0	0	0	0	0	0	0	0	0	0	0	0	0	0	0	0	0	0	0	0	0	0	0	0	0	0	1	0	0	0	0	0	0	0
FliM	0	0	0	0	0	0	0	0	0	0	0	0	0	0	0	0	0	0	0	0	0	0	0	0	0	0	0	0	0	0	0	0	0	0	0	0	0	0	0	0	0	0	1	0	0	0	0	0	0
FlgD	0	0	0	0	0	0	0	0	0	0	0	0	0	0	0	0	0	0	0	0	0	0	0	0	0	0	0	0	0	0	0	0	0	0	0	0	0	0	0	0	0	0	0	1	0	1	0	0	0
FlgB	0	0	0	0	0	0	0	0	0	0	0	0	0	0	0	0	0	0	0	0	0	0	0	0	0	0	0	0	0	0	0	0	0	0	0	0	0	0	0	0	0	0	0	0	1	1	1	1	1
FlgC	0	0	0	0	0	0	0	0	0	0	0	0	0	0	0	0	0	0	0	0	0	0	0	0	0	0	0	0	0	0	0	0	0	0	0	0	0	0	0	0	0	0	0	1	1	1	1	1	1
FliE	0	0	0	0	0	0	0	0	0	0	0	0	0	0	0	0	0	0	0	0	0	0	0	0	0	0	0	0	0	0	0	0	0	0	0	0	0	0	0	0	0	0	0	0	1	1	1	1	1
FliP	0	0	0	0	0	0	0	0	0	0	0	0	0	0	0	0	0	0	0	0	0	0	0	0	0	0	0	0	0	0	0	0	0	0	0	0	0	0	0	0	0	0	0	0	1	1	1	1	1
FliR	0	0	0	0	0	0	0	0	0	0	0	0	0	0	0	0	0	0	0	0	0	0	0	0	0	0	0	0	0	0	0	0	0	0	0	0	0	1	0	0	0	0	0	0	1	1	1	1	1
FliQ	0	0	0	0	0	0	0	0	0	0	0	0	0	0	0	0	0	0	0	0	0	0	0	0	0	0	0	0	0	0	0	0	0	0	0	0	0	0	0	0	0	0	1	0	1	1	1	1	1
FlgG	0	0	0	0	0	0	0	0	0	0	0	0	0	0	0	0	0	0	0	0	0	0	0	0	0	0	0	0	0	0	0	0	0	0	0	0	0	0	0	0	0	0	0	0	0	0	0	0	0
FlhO	0	0	0	0	0	0	0	0	0	0	0	0	0	0	0	0	0	0	0	0	0	0	0	0	0	0	0	0	0	0	0	0	0	0	0	0	0	0	0	0	0	0	0	0	0	0	0	0	0
FlhP	0	0	0	0	0	0	0	0	0	0	0	0	0	0	0	0	0	0	0	0	0	0	0	0	0	0	0	0	0	0	0	0	0	0	0	0	0	0	0	0	0	0	0	0	0	0	0	0	0
FlgK	0	0	0	0	0	0	0	0	0	0	0	0	0	0	0	0	0	0	0	0	0	0	0	0	0	0	0	0	0	0	0	0	0	0	0	0	0	0	0	0	0	0	0	0	0	0	0	0	0
MotA	0	0	0	0	0	0	0	0	0	0	0	0	0	0	0	0	0	0	0	0	0	0	0	0	0	0	0	0	0	0	0	0	0	0	0	0	0	0	0	0	0	0	0	0	0	0	0	0	0
ytxD	0	0	0	0	0	0	0	0	0	0	0	0	0	0	0	0	0	0	0	0	0	0	0	0	0	0	0	0	0	0	0	0	0	0	0	0	0	0	0	0	0	0	0	0	0	0	0	0	0
MotB	0	0	0	0	0	0	0	0	0	0	0	0	0	0	0	0	0	0	0	0	0	0	0	0	0	0	0	0	0	0	0	0	0	0	0	0	0	0	0	0	0	0	0	0	0	0	0	0	0
YtxE	0	0	0	0	0	0	0	0	0	0	0	0	0	0	0	0	0	0	0	0	0	0	0	0	0	0	0	0	0	0	0	0	0	0	0	0	0	0	0	0	0	0	0	0	0	0	0	0	0
YfnF	0	0	0	0	0	0	0	0	0	0	0	0	0	0	0	0	0	0	0	0	0	0	0	0	0	0	0	0	0	0	0	0	0	0	0	0	0	0	0	0	0	0	0	0	0	0	0	0	0
YfnD	0	0	0	0	0	0	0	0	0	0	0	0	0	0	0	0	0	0	0	0	0	0	0	0	0	0	0	0	0	0	0	0	0	0	0	0	0	0	0	0	0	0	0	0	0	0	0	0	0
GspA	0	0	0	0	0	0	0	0	0	0	0	0	0	0	0	0	0	0	0	0	0	0	0	0	0	0	0	0	0	0	0	0	0	0	0	0	0	0	0	0	0	0	0	0	0	0	0	0	0
YbdK	0	0	0	0	0	0	0	0	0	0	0	0	0	0	0	0	0	0	0	0	0	0	0	0	0	0	0	0	0	0	0	0	0	0	0	0	0	0	0	0	0	0	0	0	0	0	0	0	0
CssS	0	0	0	0	0	0	0	0	0	0	0	0	0	0	0	0	0	0	0	0	0	0	0	0	0	0	0	0	0	0	0	0	0	0	0	0	0	0	0	0	0	0	0	0	0	0	0	0	0
YkuL	0	0	0	0	0	0	0	0	0	0	0	0	0	0	0	0	0	0	0	0	0	0	0	0	0	0	0	0	0	0	0	0	0	0	0	0	0	0	0	0	0	0	0	0	0	0	0	0	0
YhcK	0	0	0	0	0	0	0	0	0	0	0	0	0	0	0	0	0	0	0	0	0	0	0	0	0	0	0	0	0	0	0	0	0	0	0	0	0	0	0	0	0	0	0	0	0	0	0	0	0
YdaK	0	0	0	0	0	0	0	0	0	0	0	0	0	0	0	0	0	0	0	0	0	0	0	0	0	0	0	0	0	0	0	0	0	0	0	0	0	0	0	0	0	0	0	0	0	0	0	0	0
NrnB	0	0	0	0	0	0	0	0	0	0	0	0	0	0	0	0	0	0	0	0	0	0	0	0	0	0	0	0	0	0	0	0	0	0	0	0	0	0	0	0	0	0	0	0	0	0	0	0	0
ComGD	0	0	0	0	0	0	0	0	0	0	0	0	0	0	0	0	0	0	0	0	0	0	0	0	0	0	0	0	0	0	0	0	0	0	0	0	0	0	0	0	0	0	0	0	0	0	0	0	0
YpfA	0	0	0	0	0	0	0	0	0	0	0	0	0	0	0	0	0	0	0	0	0	0	0	0	0	0	0	0	0	0	0	0	0	0	0	0	0	0	0	0	0	0	0	0	0	0	0	0	0
FliD	0	0	0	0	0	0	0	0	0	0	0	0	0	0	0	0	0	0	0	0	0	0	0	0	0	0	0	0	0	0	0	0	0	0	0	0	0	0	0	0	0	0	0	0	0	0	0	0	0
YlxH	0	0	0	0	0	0	0	0	0	0	0	0	0	0	0	0	0	0	0	0	0	0	0	0	0	0	0	0	0	0	0	0	0	0	0	0	0	0	0	0	0	0	0	0	0	0	0	0	0
SpsE	0	0	0	0	0	0	0	0	0	0	0	0	0	0	0	0	0	0	0	0	0	0	0	0	0	0	0	0	0	0	0	0	0	0	0	0	0	0	0	0	0	0	0	0	0	0	0	0	0
SpsG	0	0	0	0	0	0	0	0	0	0	0	0	0	0	0	0	0	0	0	0	0	0	0	0	0	0	0	0	0	0	0	0	0	0	0	0	0	0	0	0	0	0	0	0	0	0	0	0	0
YjgC	0	0	0	0	0	0	0	0	0	0	0	0	0	0	0	0	0	0	0	0	0	0	0	0	0	0	0	0	0	0	0	0	0	0	0	0	0	0	0	0	0	0	0	0	0	0	0	0	0
YrhE	0	0	0	0	0	0	0	0	0	0	0	0	0	0	0	0	0	0	0	0	0	0	0	0	0	0	0	0	0	0	0	0	0	0	0	0	0	0	0	0	0	0	0	0	0	0	0	0	0
[truncated: 26 more columns]

## Sheet: DAVID_Output_SD50
Spectral Depth 50; Directed Motility Module
Category	Term	Count	%	PValue	Genes	List Total	Pop Hits	Pop Total	Fold Enrichment	Bonferroni	Benjamini	FDR
KEGG_PATHWAY	bsu02040:Flagellar assembly	32	42.6667	4.44996e-47	P23451, P35538, P39739, P39738, P35537, P39810, P35536, P35535, P23449, P39064, P02968, P23445, P23446, P39063, P23447, P23448, P28611, P28612, P35528, P24073, P39809, P96501, P35620, P39753, P39752, O34366, P24501, P24502, P23453, P20487, P24500, P23455	51	33	1308	24.8699	3.55997e-46	3.55997e-46	3.55997e-46
UP_KEYWORDS	Chemotaxis	21	28	1.25375e-35	P31105, P54576, P24072, P24073, P39209, P39802, Q05522, P29072, P39216, P37599, P39215, P39217, P39214, P23448, P40404, P23452, P40403, P23453, P28611, P28612, P20487	75	21	4166	55.5467	6.14337e-34	6.14337e-34	5.14037e-34
KEGG_PATHWAY	bsu02030:Bacterial chemotaxis	23	30.6667	8.55987e-32	P31105, P54576, P24072, P24073, P39209, P39802, Q05522, P29072, P39216, P37599, P39215, P39217, P39214, P39064, P45709, P39063, P23448, P40404, P40403, P23453, P28611, O32239, P28612	51	24	1308	24.5784	6.8479e-31	3.42395e-31	3.42395e-31
GOTERM_BP_DIRECT	GO:0006935~chemotaxis	20	26.6667	4.55132e-31	P31105, P24072, P24073, P39209, P39802, Q05522, P29072, C0SP89, P39216, P37599, P39215, P39217, P39214, P23448, P40404, P23452, P28611, O32239, P28612, P20487	62	20	2400	38.7097	1.36539e-29	1.36539e-29	1.13783e-29
UP_KEYWORDS	Bacterial flagellum biogenesis	17	22.6667	8.05807e-26	P35528, P35538, P23451, P39809, P35620, P39739, P96503, P35536, P39753, P39752, P23449, Q01960, P23445, P23454, P40742, P20487, P23455	75	20	4166	47.2147	3.94845e-24	1.97423e-24	1.6519e-24
UP_KEYWORDS	Bacterial flagellum	14	18.6667	8.04519e-23	P96501, P39738, P35537, P39810, P35535, P02968, O34366, P24501, P24502, P23446, P23447, P23448, P23453, P24500	75	14	4166	55.5467	3.94214e-21	1.31405e-21	1.09951e-21
GOTERM_BP_DIRECT	GO:0071973~bacterial-type flagellum-dependent cell motility	13	17.3333	2.99066e-19	P24073, P96501, P39738, P39810, P02968, O34366, P23445, P24502, P23447, P23448, P23452, P23453, P20487	62	13	2400	38.7097	8.97197e-18	4.48598e-18	3.73832e-18
GOTERM_BP_DIRECT	GO:0044781~bacterial-type flagellum organization	12	16	3.83359e-16	P35528, P39753, P39752, P23449, Q01960, P39809, P39738, P35536, P23454, P40742, P20487, P23455	62	14	2400	33.1797	9.99201e-15	3.83359e-15	3.19466e-15
UP_SEQ_FEATURE	domain:Methyl-accepting transducer	10	13.3333	1.25597e-15	P54576, P39214, O07621, O06477, P39209, C0SP89, P39216, P39215, O32239, P39217	74	10	4027	54.4189	1.30673e-13	1.35645e-13	1.33133e-13
INTERPRO	IPR004089:Methyl-accepting chemotaxis protein (MCP) signalling domain	10	13.3333	3.64401e-15	P54576, P39214, O07621, O06477, P39209, C0SP89, P39216, P39215, O32239, P39217	75	10	3629	48.3867	4.54303e-13	4.51858e-13	4.37282e-13
UP_KEYWORDS	Transducer	10	13.3333	5.70393e-15	P54576, P39214, O07621, O06477, P39209, C0SP89, P39216, P39215, O32239, P39217	75	11	4166	50.497	2.77445e-13	6.98732e-14	5.84653e-14
GOTERM_CC_DIRECT	GO:0009424~bacterial-type flagellum hook	10	13.3333	2.40891e-14	P39753, P39752, P23451, P24501, P96501, P23446, P39738, P39810, P24500, P23455	57	10	2185	38.3333	4.33653e-13	4.33603e-13	3.61336e-13
SMART	SM00283:MA	10	13.3333	7.75326e-14	P54576, P39214, O07621, O06477, P39209, C0SP89, P39216, P39215, O32239, P39217	27	10	810	30	1.31739e-12	1.31805e-12	1.16299e-12
GOTERM_BP_DIRECT	GO:0071978~bacterial-type flagellum-dependent swarming motility	9	12	9.62891e-13	P39753, P39752, P23451, P24501, P23446, P39063, P28611, P24500, P23455	62	9	2400	38.7097	2.88869e-11	7.22168e-12	6.01807e-12
UP_SEQ_FEATURE	domain:HAMP	10	13.3333	2.76411e-12	P54576, P39214, O31433, P39209, O32193, C0SP89, P39216, P39215, O32239, P39217	74	17	4027	32.0111	2.95761e-10	1.49262e-10	1.46498e-10
GOTERM_BP_DIRECT	GO:0044780~bacterial-type flagellum assembly	9	12	4.71955e-12	P23451, P35538, P23445, P35620, P39739, P96503, P35537, P39810, P35535	62	10	2400	34.8387	1.41587e-10	2.83173e-11	2.35978e-11
GOTERM_MF_DIRECT	GO:0004871~signal transducer activity	8	10.6667	5.98354e-12	P54576, O07621, O06477, P39209, P39802, C0SP89, P37599, O32239	43	9	2601	53.7674	1.79506e-10	1.79506e-10	1.61556e-10
INTERPRO	IPR003660:HAMP linker domain	10	13.3333	7.91795e-12	P54576, P39214, O31433, P39209, O32193, C0SP89, P39216, P39215, O32239, P39217	75	17	3629	28.4627	9.81832e-10	4.90913e-10	4.75077e-10
GOTERM_CC_DIRECT	GO:0009425~bacterial-type flagellum basal body	8	10.6667	3.89258e-11	P35528, P24073, P24502, P23448, P23452, P35537, P23453, P35535	57	8	2185	38.3333	7.00664e-10	3.50332e-10	2.91944e-10
SMART	SM00304:HAMP	10	13.3333	7.89195e-11	P54576, P39214, O31433, P39209, O32193, C0SP89, P39216, P39215, O32239, P39217	27	16	810	18.75	1.34163e-09	6.70815e-10	5.91896e-10
UP_KEYWORDS	Bacterial flagellum protein export	7	9.33333	1.7673e-10	P35528, P35538, P23449, Q01960, P23445, P35620, P20487	75	7	4166	55.5467	8.6598e-09	1.73196e-09	1.44919e-09
UP_KEYWORDS	Methylation	8	10.6667	6.59604e-10	P54576, P39214, P39209, P25956, C0SP89, P39216, P39215, P39217	75	13	4166	34.1826	3.23206e-08	5.38677e-09	4.5073e-09
UP_KEYWORDS	Flagellar rotation	6	8	9.13688e-09	P24073, P23448, P23452, P23453, P28611, P28612	75	6	4166	55.5467	4.47707e-07	6.39582e-08	5.3516e-08
INTERPRO	IPR019776:Flagellar basal body rod protein, conserved site	6	8	1.81849e-08	P39753, P39752, P24501, P23446, P39810, P24500	75	6	3629	48.3867	2.25493e-06	5.63732e-07	5.45547e-07
INTERPRO	IPR001444:Flagellar basal body rod protein, N-terminal	6	8	1.81849e-08	P39753, P39752, P24501, P23446, P39810, P24500	75	6	3629	48.3867	2.25493e-06	5.63732e-07	5.45547e-07
KEGG_PATHWAY	bsu02020:Two-component system	19	25.3333	6.93096e-08	P31105, P54576, P24072, P39209, O32193, P39802, Q05522, P29072, P39216, P37599, P39215, P39217, P39214, P45709, P02968, O34366, P39063, P28611, O32239	51	118	1308	4.12961	5.54477e-07	1.84826e-07	1.84826e-07
GOTERM_MF_DIRECT	GO:0003774~motor activity	5	6.66667	2.90707e-07	P24073, P24502, P23447, P23448, P23453	43	5	2601	60.4884	8.72116e-06	4.3606e-06	3.92454e-06
INTERPRO	IPR010930:Flagellar basal-body/hook protein, C-terminal domain	5	6.66667	7.85099e-07	P39753, P39752, P24501, P23446, P39810	75	5	3629	48.3867	9.73476e-05	1.94705e-05	1.88424e-05
GOTERM_MF_DIRECT	GO:0005198~structural molecule activity	5	6.66667	8.61913e-07	O34366, P02968, P24502, P96501, P39810	43	6	2601	50.407	2.58571e-05	8.61913e-06	7.75721e-06
UP_SEQ_FEATURE	topological domain:Cytoplasmic	12	16	2.2707e-06	P54576, P39214, O31433, P39064, P39209, O32193, P39063, P39216, P39215, P28611, P28612, P39217	74	106	4027	6.16063	0.000242936	8.17452e-05	8.02314e-05
GOTERM_MF_DIRECT	GO:0004888~transmembrane signaling receptor activity	4	5.33333	1.54994e-05	P39214, P39216, P39215, P39217	43	4	2601	60.4884	0.000464879	0.000116246	0.000104621
INTERPRO	IPR003122:Chemotaxis methyl-accepting receptor, ligand-binding	4	5.33333	3.21011e-05	P39214, P39216, P39215, P39217	75	4	3629	48.3867	0.00397269	0.000663423	0.000642022
UP_KEYWORDS	Protein transport	7	9.33333	3.26816e-05	P35528, P35538, P23449, Q01960, P23445, P35620, P20487	75	36	4166	10.8007	0.00160014	0.000200175	0.000167493
UP_SEQ_FEATURE	topological domain:Extracellular	10	13.3333	7.03211e-05	P54576, P39214, O31433, P39064, P39209, O32193, P39216, P39215, P28612, P39217	74	101	4027	5.38801	0.00749638	0.00189867	0.00186351
GOTERM_BP_DIRECT	GO:0009306~protein secretion	5	6.66667	7.08289e-05	P35528, P35538, P35620, P35535, O34867	62	10	2400	19.3548	0.00212269	0.000354145	0.000295121
SMART	SM00319:TarH	4	5.33333	0.000115334	P39214, P39216, P39215, P39217	27	4	810	30	0.00195886	0.000653557	0.000576668
GOTERM_MF_DIRECT	GO:0008565~protein transporter activity	3	4	0.000756069	P39063, P25956, P28611	43	3	2601	60.4884	0.0224352	0.00453642	0.00408277
UP_SEQ_FEATURE	domain:CheW-like	3	4	0.000961133	P39802, P29072, P37599	74	3	4027	54.4189	0.0977745	0.0207605	0.020376
INTERPRO	IPR001029:Flagellin, D0/D1 domain	3	4	0.00121461	O34366, P02968, P96501	75	3	3629	48.3867	0.139897	0.0167346	0.0161948
INTERPRO	IPR004090:Chemotaxis methyl-accepting receptor	3	4	0.00121461	P39209, C0SP89, O32239	75	3	3629	48.3867	0.139897	0.0167346	0.0161948
INTERPRO	IPR002545:CheW-like protein	3	4	0.00121461	P39802, P29072, P37599	75	3	3629	48.3867	0.139897	0.0167346	0.0161948
GOTERM_BP_DIRECT	GO:0050918~positive chemotaxis	3	4	0.00187576	P54576, P40403, P23453	62	3	2400	38.7097	0.0547688	0.00803899	0.00669916
GOTERM_CC_DIRECT	GO:0030694~bacterial-type flagellum basal body, rod	3	4	0.00190435	P24501, P23446, P24500	57	3	2185	38.3333	0.033729	0.0114261	0.00952174
SMART	SM00260:CheW	3	4	0.00291686	P39802, P29072, P37599	27	3	810	30	0.0484462	0.0123966	0.0109382
UP_KEYWORDS	Cell membrane	31	41.3333	0.00406178	P54576, P35538, P54595, C0SP89, P39216, P35537, P39215, P35536, P35535, P39217, P39064, Q01960, P39063, P23447, P23448, P28611, O32239, P28612, P35528, P96585, P24073, P39627, P39209, O32193, P35620, P39214, O31433, P25956, P23452, P23453, P20487	75	1082	4166	1.59145	0.180804	0.0221141	0.0185036
UP_KEYWORDS	Membrane	32	42.6667	0.00492761	P54576, P35538, P54595, P29072, C0SP89, P39216, P35537, P39215, P35536, P35535, P39217, P39064, Q01960, P39063, P23447, P23448, P28611, O32239, P28612, P35528, P96585, P24073, P39627, P39209, O32193, P35620, P39214, O31433, P25956, P23452, P23453, P20487	75	1145	4166	1.5524	0.214983	0.0241453	0.0202032
GOTERM_CC_DIRECT	GO:0005622~intracellular	7	9.33333	0.00692604	O31433, P54595, Q01960, P45709, O32193, P35537, P37599	57	68	2185	3.94608	0.117594	0.0311672	0.0259727
GOTERM_MF_DIRECT	GO:0000155~phosphorelay sensor kinase activity	4	5.33333	0.0179024	O31433, P54595, O32193, P29072	43	35	2601	6.91296	0.418379	0.0895118	0.0805606
UP_SEQ_FEATURE	domain:Response regulatory	4	5.33333	0.0266046	P24072, P45709, Q05522, P37599	74	36	4027	6.04655	0.944159	0.367682	0.360873
UP_KEYWORDS	Transmembrane	26	34.6667	0.0292596	P54576, P35538, P54595, C0SP89, P39216, P35537, P39215, P35536, P35535, P39217, P39064, P39063, P23447, P28611, O32239, P28612, P35528, P96585, P39627, P39209, O32193, P35620, P39214, O31433, P25956, P23452	75	983	4166	1.46919	0.766626	0.119477	0.0999701
UP_KEYWORDS	Transmembrane helix	26	34.6667	0.0292596	P54576, P35538, P54595, C0SP89, P39216, P35537, P39215, P35536, P35535, P39217, P39064, P39063, P23447, P28611, O32239, P28612, P35528, P96585, P39627, P39209, O32193, P35620, P39214, O31433, P25956, P23452	75	983	4166	1.46919	0.766626	0.119477	0.0999701
GOTERM_MF_DIRECT	GO:0008863~formate dehydrogenase (NAD+) activity	2	2.66667	0.0320406	O34720, Q795Y4	43	2	2601	60.4884	0.623544	0.137317	0.123585
COG_ONTOLOGY	Cell motility and secretion / Signal transduction mechanisms	2	2.66667	0.0352499	P29072, P40403	16	2	844	52.75	0.193714	0.0881247	0.0881247
COG_ONTOLOGY	Cell motility and secretion	2	2.66667	0.0352499	P39753, P39752	16	2	844	52.75	0.193714	0.0881247	0.0881247
INTERPRO	IPR011006:CheY-like superfamily	4	5.33333	0.0359212	P24072, P45709, Q05522, P37599	75	36	3629	5.3763	0.989286	0.217659	0.210638
INTERPRO	IPR001789:Signal transduction response regulator, receiver domain	4	5.33333	0.0359212	P24072, P45709, Q05522, P37599	75	36	3629	5.3763	0.989286	0.217659	0.210638
UP_SEQ_FEATURE	metal ion-binding site:Iron-sulfur 5 (4Fe-4S)	2	2.66667	0.0359311	O34720, Q795Y4	74	2	4027	54.4189	0.980067	0.367682	0.360873
UP_SEQ_FEATURE	metal ion-binding site:Iron-sulfur 4 (4Fe-4S)	2	2.66667	0.0359311	O34720, Q795Y4	74	2	4027	54.4189	0.980067	0.367682	0.360873
UP_SEQ_FEATURE	metal ion-binding site:Iron-sulfur 2 (4Fe-4S); via tele nitrogen	2	2.66667	0.0359311	O34720, Q795Y4	74	2	4027	54.4189	0.980067	0.367682	0.360873
UP_SEQ_FEATURE	domain:OmpA-like	2	2.66667	0.0359311	P39064, P28612	74	2	4027	54.4189	0.980067	0.367682	0.360873
PIR_SUPERFAMILY	PIRSF036643:formate dehydrogenase, alpha subunit	2	2.66667	0.0366026	O34720, Q795Y4	12	2	596	49.6667	0.33647	0.402628	0.402628
UP_SEQ_FEATURE	transmembrane region	25	33.3333	0.0374491	P54576, P35538, P54595, C0SP89, P39216, P35537, P39215, P35536, P35535, P39217, P39064, P39063, P23447, P28611, O32239, P28612, P35528, P96585, P39627, P39209, O32193, P35620, P39214, O31433, P25956	74	936	4027	1.4535	0.98316	0.367682	0.360873
UP_KEYWORDS	Two-component regulatory system	5	6.66667	0.0380901	O31433, P24072, P45709, O32193, P29072	75	72	4166	3.85741	0.850863	0.14357	0.12013
INTERPRO	IPR025713:Motility protein B, N-terminal domain	2	2.66667	0.0403723	P39064, P28612	75	2	3629	48.3867	0.993964	0.217659	0.210638
INTERPRO	IPR006135:Type III secretion system substrate exporter	2	2.66667	0.0403723	P35538, O34867	75	2	3629	48.3867	0.993964	0.217659	0.210638
INTERPRO	IPR022522:Flagellar motor stator, MotA	2	2.66667	0.0403723	P39063, P28611	75	2	3629	48.3867	0.993964	0.217659	0.210638
INTERPRO	IPR020013:Fagellar hook-basal body protein, FlgE/F/G	2	2.66667	0.0403723	P39753, P23446	75	2	3629	48.3867	0.993964	0.217659	0.210638
INTERPRO	IPR002898:MotA/TolQ/ExbB proton channel	2	2.66667	0.0403723	P39063, P28611	75	2	3629	48.3867	0.993964	0.217659	0.210638
INTERPRO	IPR019574:NADH:ubiquinone oxidoreductase, subunit G, iron-sulphur binding	2	2.66667	0.0403723	O34720, Q795Y4	75	2	3629	48.3867	0.993964	0.217659	0.210638
INTERPRO	IPR006478:Formate dehydrogenase, alpha subunit	2	2.66667	0.0403723	O34720, Q795Y4	75	2	3629	48.3867	0.993964	0.217659	0.210638
INTERPRO	IPR006665:Outer membrane protein, OmpA/MotB, C-terminal	2	2.66667	0.0403723	P39064, P28612	75	2	3629	48.3867	0.993964	0.217659	0.210638
INTERPRO	IPR001543:Surface presentation of antigen (SpoA)	2	2.66667	0.0403723	P24073, P23453	75	2	3629	48.3867	0.993964	0.217659	0.210638
INTERPRO	IPR005069:Nucleotide-diphospho-sugar transferase	2	2.66667	0.0403723	O31542, O06484	75	2	3629	48.3867	0.993964	0.217659	0.210638
INTERPRO	IPR007597:CheC-like protein	2	2.66667	0.0403723	P24073, P40403	75	2	3629	48.3867	0.993964	0.217659	0.210638
INTERPRO	IPR000540:Flagellar motor protein MotA, conserved site	2	2.66667	0.0403723	P39063, P28611	75	2	3629	48.3867	0.993964	0.217659	0.210638
GOTERM_BP_DIRECT	GO:0015942~formate metabolic process	2	2.66667	0.0501977	O34720, Q795Y4	62	2	2400	38.7097	0.786697	0.188241	0.156868
GOTERM_CC_DIRECT	GO:0009288~bacterial-type flagellum	2	2.66667	0.0506132	O34366, P20487	57	2	2185	38.3333	0.607375	0.182207	0.151839
UP_SEQ_FEATURE	metal ion-binding site:Iron-sulfur 3 (4Fe-4S)	2	2.66667	0.0534161	O34720, Q795Y4	74	3	4027	36.2793	0.997188	0.412067	0.404436
UP_SEQ_FEATURE	domain:2Fe-2S ferredoxin-type	2	2.66667	0.0534161	O34720, Q795Y4	74	3	4027	36.2793	0.997188	0.412067	0.404436
UP_SEQ_FEATURE	metal ion-binding site:Iron-sulfur 1 (2Fe-2S)	2	2.66667	0.0534161	O34720, Q795Y4	74	3	4027	36.2793	0.997188	0.412067	0.404436
INTERPRO	IPR003661:Signal transduction histidine kinase, subgroup 1, dimerisation/phosphoacceptor domain	3	4	0.0615244	O31433, O32193, P29072	75	20	3629	7.258	0.999619	0.317876	0.307622
SMART	SM00929:SM00929	2	2.66667	0.0632056	O34720, Q795Y4	27	2	810	30	0.670426	0.214899	0.189617
INTERPRO	IPR001041:2Fe-2S ferredoxin-type domain	2	2.66667	0.0791358	O34720, Q795Y4	75	4	3629	24.1933	0.999964	0.377417	0.365242
INTERPRO	IPR000160:GGDEF domain	2	2.66667	0.0791358	P54595, P96585	75	4	3629	24.1933	0.999964	0.377417	0.365242
UP_SEQ_FEATURE	domain:GGDEF	2	2.66667	0.087453	P54595, P96585	74	5	4027	21.7676	0.999944	0.624095	0.612538
GOTERM_CC_DIRECT	GO:0005886~plasma membrane	31	41.3333	0.0901373	P54576, P35538, P54595, C0SP89, P39216, P35537, P39215, P35536, P35535, P39217, P39064, Q01960, P39063, P23447, P23448, P28611, O32239, P28612, P35528, P96585, P24073, P39627, P39209, O32193, P35620, P39214, O31433, P25956, P23452, P23453, P20487	57	959	2185	1.23914	0.817373	0.233154	0.194295
GOTERM_CC_DIRECT	GO:0016020~membrane	4	5.33333	0.0906711	O07621, O06477, P29072, O34867	57	42	2185	3.65079	0.819292	0.233154	0.194295
SMART	SM00448:REC	4	5.33333	0.0972133	P24072, P45709, Q05522, P37599	27	35	810	3.42857	0.824229	0.275438	0.243033

## Sheet: DAVID_Output_SD300
Spectral Depth 300; Chemotaxis signaling Module
Category	Term	Count	%	PValue	Genes	List Total	Pop Hits	Pop Total	Fold Enrichment	Bonferroni	Benjamini	FDR
GOTERM_BP_DIRECT	GO:0006935~chemotaxis	14	77.7778	3.15825e-27	P31105, P24072, P39209, P39802, Q05522, P29072, C0SP89, P39216, P37599, P39215, P39217, P39214, P40404, O32239	17	20	2400	98.8235	1.89495e-26	1.89495e-26	1.89495e-26
KEGG_PATHWAY	bsu02030:Bacterial chemotaxis	15	83.3333	4.2732e-27	P31105, P54576, P24072, P39209, P39802, Q05522, P29072, P39216, P37599, P39215, P39217, P39214, P45709, P40404, O32239	15	24	1308	54.5	8.5464e-27	8.5464e-27	8.5464e-27
UP_KEYWORDS	Chemotaxis	13	72.2222	3.20387e-26	P31105, P54576, P24072, P39209, P39802, Q05522, P29072, P39216, P37599, P39215, P39217, P39214, P40404	18	21	4166	143.275	7.3689e-25	7.3689e-25	7.3689e-25
UP_SEQ_FEATURE	domain:Methyl-accepting transducer	10	55.5556	3.18958e-22	P54576, P39214, O07621, O06477, P39209, C0SP89, P39216, P39215, O32239, P39217	18	10	4027	223.722	1.11635e-20	1.14825e-20	1.05256e-20
INTERPRO	IPR004089:Methyl-accepting chemotaxis protein (MCP) signalling domain	10	55.5556	8.14359e-22	P54576, P39214, O07621, O06477, P39209, C0SP89, P39216, P39215, O32239, P39217	18	10	3629	201.611	2.19877e-20	2.19877e-20	2.19877e-20
UP_KEYWORDS	Transducer	10	55.5556	1.28979e-21	P54576, P39214, O07621, O06477, P39209, C0SP89, P39216, P39215, O32239, P39217	18	11	4166	210.404	2.96652e-20	1.48326e-20	1.48326e-20
SMART	SM00283:MA	10	55.5556	2.8667e-16	P54576, P39214, O07621, O06477, P39209, C0SP89, P39216, P39215, O32239, P39217	17	10	810	47.6471	2.9976e-15	2.58003e-15	2.58003e-15
GOTERM_MF_DIRECT	GO:0004871~signal transducer activity	8	44.4444	2.58028e-15	P54576, O07621, O06477, P39209, P39802, C0SP89, P37599, O32239	17	9	2601	136	2.80886e-14	2.83831e-14	2.83831e-14
UP_SEQ_FEATURE	domain:HAMP	8	44.4444	1.09162e-13	P54576, P39214, P39209, C0SP89, P39216, P39215, O32239, P39217	18	17	4027	105.281	3.81972e-12	1.96492e-12	1.80118e-12
KEGG_PATHWAY	bsu02020:Two-component system	14	77.7778	1.81481e-13	P31105, P54576, P24072, P39209, P39802, Q05522, P29072, P39216, P37599, P39215, P39217, P39214, P45709, O32239	15	118	1308	10.3458	3.63043e-13	1.81481e-13	1.81481e-13
INTERPRO	IPR003660:HAMP linker domain	8	44.4444	2.25768e-13	P54576, P39214, P39209, C0SP89, P39216, P39215, O32239, P39217	18	17	3629	94.8758	6.09712e-12	3.04786e-12	3.04786e-12
UP_KEYWORDS	Methylation	7	38.8889	2.88919e-12	P54576, P39214, P39209, C0SP89, P39216, P39215, P39217	18	13	4166	124.624	6.64526e-11	2.21505e-11	2.21505e-11
SMART	SM00304:HAMP	8	44.4444	2.70713e-09	P54576, P39214, P39209, C0SP89, P39216, P39215, O32239, P39217	17	16	810	23.8235	2.43641e-08	1.21821e-08	1.21821e-08
INTERPRO	IPR003122:Chemotaxis methyl-accepting receptor, ligand-binding	4	22.2222	3.40768e-07	P39214, P39216, P39215, P39217	18	4	3629	201.611	9.2007e-06	3.06691e-06	3.06691e-06
GOTERM_MF_DIRECT	GO:0004888~transmembrane signaling receptor activity	4	22.2222	7.61809e-07	P39214, P39216, P39215, P39217	17	4	2601	153	8.37987e-06	4.18995e-06	4.18995e-06
SMART	SM00319:TarH	4	22.2222	2.5077e-05	P39214, P39216, P39215, P39217	17	4	810	47.6471	0.00022567	7.5231e-05	7.5231e-05
UP_SEQ_FEATURE	topological domain:Extracellular	6	33.3333	4.37713e-05	P54576, P39214, P39209, P39216, P39215, P39217	18	101	4027	13.2904	0.00153086	0.000398156	0.000364976
UP_SEQ_FEATURE	domain:CheW-like	3	16.6667	5.02059e-05	P39802, P29072, P37599	18	3	4027	223.722	0.00175571	0.000398156	0.000364976
UP_SEQ_FEATURE	topological domain:Cytoplasmic	6	33.3333	5.52994e-05	P54576, P39214, P39209, P39216, P39215, P39217	18	106	4027	12.6635	0.00193366	0.000398156	0.000364976
INTERPRO	IPR002545:CheW-like protein	3	16.6667	6.18069e-05	P39802, P29072, P37599	18	3	3629	201.611	0.00166745	0.000333757	0.000333757
INTERPRO	IPR004090:Chemotaxis methyl-accepting receptor	3	16.6667	6.18069e-05	P39209, C0SP89, O32239	18	3	3629	201.611	0.00166745	0.000333757	0.000333757
UP_SEQ_FEATURE	domain:Response regulatory	4	22.2222	0.000409523	P24072, P45709, Q05522, P37599	18	36	4027	24.858	0.014234	0.00245714	0.00225238
INTERPRO	IPR011006:CheY-like superfamily	4	22.2222	0.000554344	P24072, P45709, Q05522, P37599	18	36	3629	22.4012	0.0148599	0.00213818	0.00213818
INTERPRO	IPR001789:Signal transduction response regulator, receiver domain	4	22.2222	0.000554344	P24072, P45709, Q05522, P37599	18	36	3629	22.4012	0.0148599	0.00213818	0.00213818
SMART	SM00260:CheW	3	16.6667	0.00108606	P39802, P29072, P37599	17	3	810	47.6471	0.00973217	0.00244363	0.00244363
UP_KEYWORDS	Phosphoprotein	5	27.7778	0.00601763	P24072, P45709, Q05522, P29072, P37599	18	188	4166	6.15544	0.129619	0.0346014	0.0346014
SMART	SM00448:REC	4	22.2222	0.0281279	P24072, P45709, Q05522, P37599	17	35	810	5.44538	0.226461	0.0506302	0.0506302
GOTERM_BP_DIRECT	GO:0000160~phosphorelay signal transduction system	3	16.6667	0.0320982	P24072, P45709, P37599	17	43	2400	9.84952	0.17778	0.0962945	0.0962945
GOTERM_CC_DIRECT	GO:0016020~membrane	3	16.6667	0.0323326	O07621, O06477, P29072	16	42	2185	9.75446	0.151541	0.161663	0.161663
UP_KEYWORDS	Two-component regulatory system	3	16.6667	0.0338863	P24072, P45709, P29072	18	72	4166	9.64352	0.547468	0.155877	0.155877
UP_KEYWORDS	Membrane	9	50	0.0666527	P54576, P39214, P39209, P29072, C0SP89, P39216, P39215, O32239, P39217	18	1145	4166	1.81921	0.795358	0.236718	0.236718
UP_SEQ_FEATURE	transmembrane region	8	44.4444	0.076835	P54576, P39214, P39209, C0SP89, P39216, P39215, O32239, P39217	18	936	4027	1.91216	0.939078	0.395151	0.362222
UP_KEYWORDS	Transmembrane	8	44.4444	0.0823366	P54576, P39214, P39209, C0SP89, P39216, P39215, O32239, P39217	18	983	4166	1.88358	0.861414	0.236718	0.236718
UP_KEYWORDS	Transmembrane helix	8	44.4444	0.0823366	P54576, P39214, P39209, C0SP89, P39216, P39215, O32239, P39217	18	983	4166	1.88358	0.861414	0.236718	0.236718
Spectral Depth 300; Cell Wall Biogenesis Module
Category	Term	Count	%	PValue	Genes	List Total	Pop Hits	Pop Total	Fold Enrichment	Bonferroni	Benjamini	FDR
COG_ONTOLOGY	Cell envelope biogenesis, outer membrane	2	100	0.0699052	P39627, P39625	2	59	844	14.3051	0.134924	0.0699052	0.0699052
Spectral Depth 300; Formate Dehydrogenase Module
Category	Term	Count	%	PValue	Genes	List Total	Pop Hits	Pop Total	Fold Enrichment	Bonferroni	Benjamini	FDR
UP_SEQ_FEATURE	metal ion-binding site:Iron-sulfur 5 (4Fe-4S)	2	100	0.000496648	O34720, Q795Y4	2	2	4027	2013.5	0.00544958	0.00148994	0.00148994
UP_SEQ_FEATURE	metal ion-binding site:Iron-sulfur 2 (4Fe-4S); via tele nitrogen	2	100	0.000496648	O34720, Q795Y4	2	2	4027	2013.5	0.00544958	0.00148994	0.00148994
UP_SEQ_FEATURE	metal ion-binding site:Iron-sulfur 4 (4Fe-4S)	2	100	0.000496648	O34720, Q795Y4	2	2	4027	2013.5	0.00544958	0.00148994	0.00148994
INTERPRO	IPR006478:Formate dehydrogenase, alpha subunit	2	100	0.000551116	O34720, Q795Y4	2	2	3629	1814.5	0.00549751	0.00241113	0.00241113
INTERPRO	IPR019574:NADH:ubiquinone oxidoreductase, subunit G, iron-sulphur binding	2	100	0.000551116	O34720, Q795Y4	2	2	3629	1814.5	0.00549751	0.00241113	0.00241113
UP_SEQ_FEATURE	metal ion-binding site:Iron-sulfur 3 (4Fe-4S)	2	100	0.000744971	O34720, Q795Y4	2	3	4027	1342.33	0.00816423	0.00148994	0.00148994
UP_SEQ_FEATURE	domain:2Fe-2S ferredoxin-type	2	100	0.000744971	O34720, Q795Y4	2	3	4027	1342.33	0.00816423	0.00148994	0.00148994
UP_SEQ_FEATURE	metal ion-binding site:Iron-sulfur 1 (2Fe-2S)	2	100	0.000744971	O34720, Q795Y4	2	3	4027	1342.33	0.00816423	0.00148994	0.00148994
GOTERM_MF_DIRECT	GO:0008863~formate dehydrogenase (NAD+) activity	2	100	0.000768935	O34720, Q795Y4	2	2	2601	1300.5	0.00383877	0.00384468	0.00153787
GOTERM_BP_DIRECT	GO:0015942~formate metabolic process	2	100	0.000833333	O34720, Q795Y4	2	2	2400	1200	0.00166597	0.000833333	0.000833333
INTERPRO	IPR001041:2Fe-2S ferredoxin-type domain	2	100	0.00110223	O34720, Q795Y4	2	4	3629	907.25	0.0109678	0.00241113	0.00241113
UP_SEQ_FEATURE	metal ion-binding site:Iron-sulfur 2 (4Fe-4S)	2	100	0.00148994	O34720, Q795Y4	2	6	4027	671.167	0.0162678	0.00198659	0.00198659
UP_SEQ_FEATURE	domain:4Fe-4S ferredoxin-type 2	2	100	0.00148994	O34720, Q795Y4	2	6	4027	671.167	0.0162678	0.00198659	0.00198659
UP_SEQ_FEATURE	domain:4Fe-4S ferredoxin-type 1	2	100	0.00148994	O34720, Q795Y4	2	6	4027	671.167	0.0162678	0.00198659	0.00198659
INTERPRO	IPR006963:Molybdopterin oxidoreductase, 4Fe-4S domain	2	100	0.00165335	O34720, Q795Y4	2	6	3629	604.833	0.016411	0.00241113	0.00241113
INTERPRO	IPR006656:Molybdopterin oxidoreductase	2	100	0.00165335	O34720, Q795Y4	2	6	3629	604.833	0.016411	0.00241113	0.00241113
INTERPRO	IPR006657:Molydopterin dinucleotide-binding domain	2	100	0.00165335	O34720, Q795Y4	2	6	3629	604.833	0.016411	0.00241113	0.00241113
INTERPRO	IPR017900:4Fe-4S ferredoxin, iron-sulphur binding, conserved site	2	100	0.00192891	O34720, Q795Y4	2	7	3629	518.429	0.0191225	0.00241113	0.00241113
INTERPRO	IPR009010:Aspartate decarboxylase-like domain	2	100	0.00192891	O34720, Q795Y4	2	7	3629	518.429	0.0191225	0.00241113	0.00241113
UP_KEYWORDS	2Fe-2S	2	100	0.00240038	O34720, Q795Y4	2	10	4166	416.6	0.0190425	0.00960154	0.00960154
UP_KEYWORDS	Molybdenum	2	100	0.00240038	O34720, Q795Y4	2	10	4166	416.6	0.0190425	0.00960154	0.00960154
SMART	SM00929:SM00929	2	100	0.00246914	O34720, Q795Y4	2	2	810	405	0.00493217	0.00493827	0.00493827
INTERPRO	IPR017896:4Fe-4S ferredoxin-type, iron-sulpur binding domain	2	100	0.00248002	O34720, Q795Y4	2	9	3629	403.222	0.0245253	0.00275558	0.00275558
GOTERM_MF_DIRECT	GO:0030151~molybdenum ion binding	2	100	0.00307574	O34720, Q795Y4	2	8	2601	325.125	0.0152844	0.00768935	0.00307574
PIR_SUPERFAMILY	PIRSF036643:formate dehydrogenase, alpha subunit	2	100	0.0033557	O34720, Q795Y4	2	2	596	298	0.0033557	0.0033557	0.0033557
GOTERM_MF_DIRECT	GO:0051537~2 iron, 2 sulfur cluster binding	2	100	0.00538255	O34720, Q795Y4	2	14	2601	185.786	0.0266246	0.00897091	0.00538255
SMART	SM00926:SM00926	2	100	0.00740741	O34720, Q795Y4	2	6	810	135	0.0147599	0.00740741	0.00740741
UP_KEYWORDS	4Fe-4S	2	100	0.0100816	O34720, Q795Y4	2	42	4166	99.1905	0.0778637	0.0268843	0.0268843
GOTERM_MF_DIRECT	GO:0009055~electron carrier activity	2	100	0.0119185	O34720, Q795Y4	2	31	2601	83.9032	0.0581888	0.0148981	0.0119185
UP_KEYWORDS	Iron-sulfur	2	100	0.0136822	O34720, Q795Y4	2	57	4166	73.0877	0.104357	0.0273644	0.0273644
GOTERM_MF_DIRECT	GO:0051539~4 iron, 4 sulfur cluster binding	2	100	0.0176855	O34720, Q795Y4	2	46	2601	56.5435	0.0853546	0.0176855	0.0176855
KEGG_PATHWAY	bsu00680:Methane metabolism	2	100	0.0191131	O34720, Q795Y4	2	25	1308	52.32	0.0919818	0.0592508	0.0237003
KEGG_PATHWAY	bsu00630:Glyoxylate and dicarboxylate metabolism	2	100	0.0237003	O34720, Q795Y4	2	31	1308	42.1935	0.113016	0.0592508	0.0237003
UP_KEYWORDS	Iron	2	100	0.0319251	O34720, Q795Y4	2	133	4166	31.3233	0.228614	0.0510802	0.0510802
UP_KEYWORDS	Oxidoreductase	2	100	0.0700912	O34720, Q795Y4	2	292	4166	14.2671	0.440857	0.093455	0.093455
KEGG_PATHWAY	bsu01200:Carbon metabolism	2	100	0.074159	O34720, Q795Y4	2	97	1308	13.4845	0.319729	0.123598	0.074159
Spectral Depth 300; Flagellum Module
Category	Term	Count	%	PValue	Genes	List Total	Pop Hits	Pop Total	Fold Enrichment	Bonferroni	Benjamini	FDR
KEGG_PATHWAY	bsu02040:Flagellar assembly	31	83.7838	1.98689e-56	P23451, P35538, P39739, P35537, P39810, P35536, P35535, P23449, P39064, P02968, P23445, P23446, P23447, P39063, P23448, P28611, P28612, P35528, P24073, P39809, P96501, P35620, P39753, P39752, O34366, P24501, P24502, P23453, P20487, P24500, P23455	32	33	1308	38.3977	5.96067e-56	5.96067e-56	5.96067e-56
UP_KEYWORDS	Bacterial flagellum	13	35.1351	2.0049e-24	P96501, P35537, P39810, P35535, P02968, O34366, P24501, P24502, P23446, P23447, P23448, P23453, P24500	37	14	4166	104.552	5.61372e-23	5.61372e-23	4.61127e-23
UP_KEYWORDS	Bacterial flagellum biogenesis	14	37.8378	9.6017e-24	P35528, P35538, P23451, P39809, P35620, P39739, P35536, P39753, P39752, P23449, P23445, P23454, P20487, P23455	37	20	4166	78.8162	2.68848e-22	1.34424e-22	1.1042e-22
GOTERM_BP_DIRECT	GO:0071973~bacterial-type flagellum-dependent cell motility	12	32.4324	5.87494e-20	O34366, P02968, P24073, P23445, P24502, P96501, P23447, P23448, P23452, P39810, P23453, P20487	35	13	2400	63.2967	1.11624e-18	1.11624e-18	8.22492e-19
GOTERM_BP_DIRECT	GO:0071978~bacterial-type flagellum-dependent swarming motility	9	24.3243	5.98996e-15	P39753, P39752, P23451, P24501, P23446, P39063, P28611, P24500, P23455	35	9	2400	68.5714	1.13909e-13	5.69046e-14	4.19297e-14
GOTERM_CC_DIRECT	GO:0009424~bacterial-type flagellum hook	9	24.3243	1.48918e-14	P39753, P39752, P23451, P24501, P96501, P23446, P39810, P24500, P23455	30	10	2185	65.55	2.08278e-13	2.08485e-13	2.08485e-13
GOTERM_CC_DIRECT	GO:0009425~bacterial-type flagellum basal body	8	21.6216	2.64861e-13	P35528, P24073, P24502, P23448, P23452, P35537, P23453, P35535	30	8	2185	72.8333	3.70859e-12	1.85403e-12	1.85403e-12
GOTERM_BP_DIRECT	GO:0044781~bacterial-type flagellum organization	9	24.3243	1.90622e-12	P35528, P39753, P39752, P23449, P39809, P35536, P23454, P20487, P23455	35	14	2400	44.0816	3.62188e-11	1.20727e-11	8.8957e-12
GOTERM_BP_DIRECT	GO:0044780~bacterial-type flagellum assembly	8	21.6216	6.94632e-12	P23451, P35538, P23445, P35620, P39739, P35537, P39810, P35535	35	10	2400	54.8571	1.3198e-10	3.2995e-11	2.43121e-11
UP_KEYWORDS	Chemotaxis	8	21.6216	2.07214e-10	P24073, P23448, P23452, P40403, P23453, P28611, P28612, P20487	37	21	4166	42.8932	5.80199e-09	1.50836e-09	1.23901e-09
UP_KEYWORDS	Flagellar rotation	6	16.2162	2.1548e-10	P24073, P23448, P23452, P23453, P28611, P28612	37	6	4166	112.595	6.03343e-09	1.50836e-09	1.23901e-09
INTERPRO	IPR001444:Flagellar basal body rod protein, N-terminal	6	16.2162	4.29359e-10	P39753, P39752, P24501, P23446, P39810, P24500	37	6	3629	98.0811	2.53322e-08	1.26661e-08	1.22367e-08
INTERPRO	IPR019776:Flagellar basal body rod protein, conserved site	6	16.2162	4.29359e-10	P39753, P39752, P24501, P23446, P39810, P24500	37	6	3629	98.0811	2.53322e-08	1.26661e-08	1.22367e-08
UP_KEYWORDS	Bacterial flagellum protein export	6	16.2162	7.49497e-10	P35528, P35538, P23449, P23445, P35620, P20487	37	7	4166	96.5097	2.09859e-08	4.19718e-09	3.44768e-09
GOTERM_MF_DIRECT	GO:0003774~motor activity	5	13.5135	1.8738e-09	P24073, P24502, P23447, P23448, P23453	14	5	2601	185.786	1.49904e-08	1.49904e-08	1.49904e-08
GOTERM_MF_DIRECT	GO:0005198~structural molecule activity	5	13.5135	5.6058e-09	O34366, P02968, P24502, P96501, P39810	14	6	2601	154.821	4.48464e-08	2.24232e-08	2.24232e-08
INTERPRO	IPR010930:Flagellar basal-body/hook protein, C-terminal domain	5	13.5135	4.05346e-08	P39753, P39752, P24501, P23446, P39810	37	5	3629	98.0811	2.39154e-06	7.9718e-07	7.70157e-07
KEGG_PATHWAY	bsu02030:Bacterial chemotaxis	8	21.6216	5.39142e-07	P39064, P24073, P39063, P23448, P40403, P23453, P28611, P28612	32	24	1308	13.625	1.61743e-06	8.08713e-07	8.08713e-07
GOTERM_BP_DIRECT	GO:0006935~chemotaxis	6	16.2162	5.60696e-06	P24073, P23448, P23452, P28611, P28612, P20487	35	20	2400	20.5714	0.000106527	2.13065e-05	1.56995e-05
UP_KEYWORDS	Protein transport	6	16.2162	1.12309e-05	P35528, P35538, P23449, P23445, P35620, P20487	37	36	4166	18.7658	0.000314419	5.2411e-05	4.30519e-05
INTERPRO	IPR001029:Flagellin, D0/D1 domain	3	8.10811	0.000285309	O34366, P02968, P96501	37	3	3629	98.0811	0.0166947	0.0042083	0.00406565
GOTERM_BP_DIRECT	GO:0009306~protein secretion	4	10.8108	0.000291495	P35528, P35538, P35620, P35535	35	10	2400	27.4286	0.0055239	0.000923067	0.000680155
GOTERM_CC_DIRECT	GO:0030694~bacterial-type flagellum basal body, rod	3	8.10811	0.000506264	P24501, P23446, P24500	30	3	2185	72.8333	0.00706442	0.00236257	0.00236257
COG_ONTOLOGY	Cell motility and secretion	2	5.40541	0.00946181	P39753, P39752	5	2	844	168.8	0.0281177	0.0189236	0.0189236
GOTERM_MF_DIRECT	GO:0008565~protein transporter activity	2	5.40541	0.0149251	P39063, P28611	14	3	2601	123.857	0.113347	0.0398003	0.0398003
UP_SEQ_FEATURE	domain:OmpA-like	2	5.40541	0.0178016	P39064, P28612	37	2	4027	108.838	0.53808	0.78327	0.78327
INTERPRO	IPR006665:Outer membrane protein, OmpA/MotB, C-terminal	2	5.40541	0.0197445	P39064, P28612	37	2	3629	98.0811	0.691668	0.0896095	0.0865719
INTERPRO	IPR022522:Flagellar motor stator, MotA	2	5.40541	0.0197445	P39063, P28611	37	2	3629	98.0811	0.691668	0.0896095	0.0865719
INTERPRO	IPR025713:Motility protein B, N-terminal domain	2	5.40541	0.0197445	P39064, P28612	37	2	3629	98.0811	0.691668	0.0896095	0.0865719
INTERPRO	IPR007597:CheC-like protein	2	5.40541	0.0197445	P24073, P40403	37	2	3629	98.0811	0.691668	0.0896095	0.0865719
INTERPRO	IPR005069:Nucleotide-diphospho-sugar transferase	2	5.40541	0.0197445	O31542, O06484	37	2	3629	98.0811	0.691668	0.0896095	0.0865719
INTERPRO	IPR020013:Fagellar hook-basal body protein, FlgE/F/G	2	5.40541	0.0197445	P39753, P23446	37	2	3629	98.0811	0.691668	0.0896095	0.0865719
INTERPRO	IPR000540:Flagellar motor protein MotA, conserved site	2	5.40541	0.0197445	P39063, P28611	37	2	3629	98.0811	0.691668	0.0896095	0.0865719
INTERPRO	IPR001543:Surface presentation of antigen (SpoA)	2	5.40541	0.0197445	P24073, P23453	37	2	3629	98.0811	0.691668	0.0896095	0.0865719
INTERPRO	IPR002898:MotA/TolQ/ExbB proton channel	2	5.40541	0.0197445	P39063, P28611	37	2	3629	98.0811	0.691668	0.0896095	0.0865719
GOTERM_CC_DIRECT	GO:0009288~bacterial-type flagellum	2	5.40541	0.0263745	O34366, P20487	30	2	2185	72.8333	0.31216	0.0923106	0.0923106
UP_KEYWORDS	Cell membrane	16	43.2432	0.0285804	P35528, P35538, P24073, P35620, P35537, P35536, P35535, P39064, P23447, P39063, P23448, P23452, P23453, P28611, P28612, P20487	37	1082	4166	1.66498	0.555991	0.114322	0.0939071
GOTERM_BP_DIRECT	GO:0050918~positive chemotaxis	2	5.40541	0.041918	P40403, P23453	35	3	2400	45.7143	0.556748	0.113777	0.083836
UP_KEYWORDS	Membrane	16	43.2432	0.0459617	P35528, P35538, P24073, P35620, P35537, P35536, P35535, P39064, P23447, P39063, P23448, P23452, P23453, P28611, P28612, P20487	37	1145	4166	1.57337	0.73218	0.160866	0.13214
UP_SEQ_FEATURE	topological domain:Cytoplasmic	4	10.8108	0.0676221	P39064, P39063, P28611, P28612	37	106	4027	4.10709	0.950744	1	1
UP_KEYWORDS	Transport	9	24.3243	0.0707713	P35528, P35538, P23449, P39064, P23445, P35620, P39063, P28611, P20487	37	519	4166	1.95251	0.871934	0.220177	0.18086

## Sheet: DAVID_Output_SD1000
Spectral Depth 1000; Chemoreception Module
Category	Term	Count	%	PValue	Genes	List Total	Pop Hits	Pop Total	Fold Enrichment	Bonferroni	Benjamini	FDR
UP_SEQ_FEATURE	domain:Methyl-accepting transducer	10	100	1.31466e-26	P54576, P39214, O07621, O06477, P39209, C0SP89, P39216, P39215, O32239, P39217	10	10	4027	402.7	2.23492e-25	2.36639e-25	2.23492e-25
INTERPRO	IPR004089:Methyl-accepting chemotaxis protein (MCP) signalling domain	10	100	3.35731e-26	P54576, P39214, O07621, O06477, P39209, C0SP89, P39216, P39215, O32239, P39217	10	10	3629	362.9	2.68585e-25	2.68585e-25	2.68585e-25
UP_KEYWORDS	Transducer	10	100	5.32608e-26	P54576, P39214, O07621, O06477, P39209, C0SP89, P39216, P39215, O32239, P39217	10	11	4166	378.727	6.3913e-25	6.3913e-25	6.3913e-25
SMART	SM00283:MA	10	100	2.52795e-20	P54576, P39214, O07621, O06477, P39209, C0SP89, P39216, P39215, O32239, P39217	10	10	810	81	7.58384e-20	7.58384e-20	5.05589e-20
UP_SEQ_FEATURE	domain:HAMP	8	80	2.05513e-16	P54576, P39214, P39209, C0SP89, P39216, P39215, O32239, P39217	10	17	4027	189.506	3.77476e-15	1.84962e-15	1.74686e-15
INTERPRO	IPR003660:HAMP linker domain	8	80	4.25806e-16	P54576, P39214, P39209, C0SP89, P39216, P39215, O32239, P39217	10	17	3629	170.776	3.55271e-15	1.70323e-15	1.70323e-15
UP_KEYWORDS	Methylation	7	70	1.98236e-14	P54576, P39214, P39209, C0SP89, P39216, P39215, P39217	10	13	4166	224.323	2.38476e-13	1.18942e-13	1.18942e-13
GOTERM_BP_DIRECT	GO:0006935~chemotaxis	7	70	4.07345e-12	P39214, P39209, C0SP89, P39216, P39215, O32239, P39217	9	20	2400	93.3333	1.62936e-11	1.62938e-11	1.62938e-11
SMART	SM00304:HAMP	8	80	9.1304e-12	P54576, P39214, P39209, C0SP89, P39216, P39215, O32239, P39217	10	16	810	40.5	2.73911e-11	1.36956e-11	9.1304e-12
GOTERM_MF_DIRECT	GO:0004871~signal transducer activity	6	60	1.5983e-11	P54576, O07621, O06477, P39209, C0SP89, O32239	10	9	2601	173.4	7.9915e-11	7.99149e-11	7.99149e-11
KEGG_PATHWAY	bsu02030:Bacterial chemotaxis	7	70	1.95752e-11	P54576, P39214, P39209, P39216, P39215, O32239, P39217	7	24	1308	54.5	3.91502e-11	3.91503e-11	3.91503e-11
UP_KEYWORDS	Chemotaxis	6	60	2.42641e-10	P54576, P39214, P39209, P39216, P39215, P39217	10	21	4166	119.029	2.9117e-09	9.70565e-10	9.70565e-10
INTERPRO	IPR003122:Chemotaxis methyl-accepting receptor, ligand-binding	4	40	4.21647e-08	P39214, P39216, P39215, P39217	10	4	3629	362.9	3.37318e-07	1.12439e-07	1.12439e-07
GOTERM_MF_DIRECT	GO:0004888~transmembrane signaling receptor activity	4	40	1.14503e-07	P39214, P39216, P39215, P39217	10	4	2601	260.1	5.72516e-07	2.86258e-07	2.86258e-07
KEGG_PATHWAY	bsu02020:Two-component system	7	70	4.79234e-07	P54576, P39214, P39209, P39216, P39215, O32239, P39217	7	118	1308	11.0847	9.58469e-07	4.79234e-07	4.79234e-07
UP_SEQ_FEATURE	topological domain:Extracellular	6	60	1.0462e-06	P54576, P39214, P39209, P39216, P39215, P39217	10	101	4027	23.9228	1.77852e-05	5.99795e-06	5.66473e-06
UP_SEQ_FEATURE	topological domain:Cytoplasmic	6	60	1.33288e-06	P54576, P39214, P39209, P39216, P39215, P39217	10	106	4027	22.7943	2.26587e-05	5.99795e-06	5.66473e-06
SMART	SM00319:TarH	4	40	3.78632e-06	P39214, P39216, P39215, P39217	10	4	810	81	1.13589e-05	3.78632e-06	3.78632e-06
INTERPRO	IPR004090:Chemotaxis methyl-accepting receptor	3	30	1.63848e-05	P39209, C0SP89, O32239	10	3	3629	362.9	0.000131071	3.27695e-05	3.27695e-05
UP_SEQ_FEATURE	transmembrane region	8	80	0.000826153	P54576, P39214, P39209, C0SP89, P39216, P39215, O32239, P39217	10	936	4027	3.44188	0.0139522	0.00297415	0.00280892
UP_KEYWORDS	Transmembrane	8	80	0.000911667	P54576, P39214, P39209, C0SP89, P39216, P39215, O32239, P39217	10	983	4166	3.39044	0.0108853	0.002188	0.002188
UP_KEYWORDS	Transmembrane helix	8	80	0.000911667	P54576, P39214, P39209, C0SP89, P39216, P39215, O32239, P39217	10	983	4166	3.39044	0.0108853	0.002188	0.002188
UP_KEYWORDS	Cell membrane	8	80	0.00169614	P54576, P39214, P39209, C0SP89, P39216, P39215, O32239, P39217	10	1082	4166	3.08022	0.0201648	0.00339227	0.00339227
UP_KEYWORDS	Membrane	8	80	0.00243815	P54576, P39214, P39209, C0SP89, P39216, P39215, O32239, P39217	10	1145	4166	2.91074	0.0288686	0.00417968	0.00417968
GOTERM_CC_DIRECT	GO:0016021~integral component of membrane	8	80	0.0229908	P54576, P39214, P39209, C0SP89, P39216, P39215, O32239, P39217	10	863	2185	2.02549	0.0673989	0.0641913	0.0427942
GOTERM_CC_DIRECT	GO:0005886~plasma membrane	8	80	0.0427942	P54576, P39214, P39209, C0SP89, P39216, P39215, O32239, P39217	10	959	2185	1.82273	0.122967	0.0641913	0.0427942
Spectral Depth 1000; Chemotransmission Module
Category	Term	Count	%	PValue	Genes	List Total	Pop Hits	Pop Total	Fold Enrichment	Bonferroni	Benjamini	FDR
UP_KEYWORDS	Chemotaxis	7	87.5	5.23145e-14	P31105, P24072, P39802, Q05522, P29072, P40404, P37599	8	21	4166	173.583	7.32081e-13	7.32403e-13	7.32403e-13
KEGG_PATHWAY	bsu02030:Bacterial chemotaxis	8	100	2.70625e-13	P31105, P24072, P45709, P39802, Q05522, P29072, P40404, P37599	8	24	1308	54.5	5.41345e-13	5.41249e-13	5.41249e-13
GOTERM_BP_DIRECT	GO:0006935~chemotaxis	7	87.5	1.02351e-12	P31105, P24072, P39802, Q05522, P29072, P40404, P37599	8	20	2400	105	3.07054e-12	3.07054e-12	3.07054e-12
KEGG_PATHWAY	bsu02020:Two-component system	7	87.5	3.10729e-06	P31105, P24072, P45709, P39802, Q05522, P29072, P37599	8	118	1308	9.69915	6.21458e-06	3.10729e-06	3.10729e-06
UP_SEQ_FEATURE	domain:CheW-like	3	37.5	7.76525e-06	P39802, P29072, P37599	8	3	4027	503.375	0.000132001	0.000139774	0.000139774
INTERPRO	IPR002545:CheW-like protein	3	37.5	9.5613e-06	P39802, P29072, P37599	8	3	3629	453.625	0.000181649	0.000181665	0.000181665
UP_SEQ_FEATURE	domain:Response regulatory	4	50	2.24172e-05	P24072, P45709, Q05522, P37599	8	36	4027	55.9306	0.000381025	0.000201755	0.000201755
INTERPRO	IPR001789:Signal transduction response regulator, receiver domain	4	50	3.05507e-05	P24072, P45709, Q05522, P37599	8	36	3629	50.4028	0.000580305	0.000193488	0.000193488
INTERPRO	IPR011006:CheY-like superfamily	4	50	3.05507e-05	P24072, P45709, Q05522, P37599	8	36	3629	50.4028	0.000580305	0.000193488	0.000193488
UP_KEYWORDS	Phosphoprotein	5	62.5	0.000126372	P24072, P45709, Q05522, P29072, P37599	8	188	4166	13.8497	0.00176775	0.000884602	0.000884602
SMART	SM00260:CheW	3	37.5	0.00013689	P39802, P29072, P37599	7	3	810	115.714	0.000821062	0.000821343	0.000821343
SMART	SM00448:REC	4	50	0.00135504	P24072, P45709, Q05522, P37599	7	35	810	13.2245	0.00810277	0.00406513	0.00406513
UP_KEYWORDS	Two-component regulatory system	3	37.5	0.00584876	P24072, P45709, P29072	8	72	4166	21.6979	0.0788413	0.0272942	0.0272942
GOTERM_BP_DIRECT	GO:0000160~phosphorelay signal transduction system	3	37.5	0.00622098	P24072, P45709, P37599	8	43	2400	20.9302	0.0185471	0.00933147	0.00933147
GOTERM_MF_DIRECT	GO:0004871~signal transducer activity	2	25	0.0206021	P39802, P37599	7	9	2601	82.5714	0.15341	0.164817	0.164817
Spectral Depth 1000; CheY-P-hydrolysis Module
Category	Term	Count	%	PValue	Genes	List Total	Pop Hits	Pop Total	Fold Enrichment	Bonferroni	Benjamini	FDR
INTERPRO	IPR007597:CheC-like protein	2	100	0.000551116	P24073, P40403	2	2	3629	1814.5	0.00220264	0.00220446	0.00220446
UP_KEYWORDS	Chemotaxis	2	100	0.00504081	P24073, P40403	2	21	4166	198.381	0.0249512	0.025204	0.025204
KEGG_PATHWAY	bsu02030:Bacterial chemotaxis	2	100	0.0183486	P24073, P40403	2	24	1308	54.5	0.0363606	0.0366972	0.0366972
Spectral Depth 1000; Formate dehydrogenase Module
Category	Term	Count	%	PValue	Genes	List Total	Pop Hits	Pop Total	Fold Enrichment	Bonferroni	Benjamini	FDR
UP_SEQ_FEATURE	metal ion-binding site:Iron-sulfur 5 (4Fe-4S)	2	100	0.000496648	O34720, Q795Y4	2	2	4027	2013.5	0.00544958	0.00148994	0.00148994
UP_SEQ_FEATURE	metal ion-binding site:Iron-sulfur 2 (4Fe-4S); via tele nitrogen	2	100	0.000496648	O34720, Q795Y4	2	2	4027	2013.5	0.00544958	0.00148994	0.00148994
UP_SEQ_FEATURE	metal ion-binding site:Iron-sulfur 4 (4Fe-4S)	2	100	0.000496648	O34720, Q795Y4	2	2	4027	2013.5	0.00544958	0.00148994	0.00148994
INTERPRO	IPR006478:Formate dehydrogenase, alpha subunit	2	100	0.000551116	O34720, Q795Y4	2	2	3629	1814.5	0.00549751	0.00241113	0.00241113
INTERPRO	IPR019574:NADH:ubiquinone oxidoreductase, subunit G, iron-sulphur binding	2	100	0.000551116	O34720, Q795Y4	2	2	3629	1814.5	0.00549751	0.00241113	0.00241113
UP_SEQ_FEATURE	metal ion-binding site:Iron-sulfur 3 (4Fe-4S)	2	100	0.000744971	O34720, Q795Y4	2	3	4027	1342.33	0.00816423	0.00148994	0.00148994
UP_SEQ_FEATURE	domain:2Fe-2S ferredoxin-type	2	100	0.000744971	O34720, Q795Y4	2	3	4027	1342.33	0.00816423	0.00148994	0.00148994
UP_SEQ_FEATURE	metal ion-binding site:Iron-sulfur 1 (2Fe-2S)	2	100	0.000744971	O34720, Q795Y4	2	3	4027	1342.33	0.00816423	0.00148994	0.00148994
GOTERM_MF_DIRECT	GO:0008863~formate dehydrogenase (NAD+) activity	2	100	0.000768935	O34720, Q795Y4	2	2	2601	1300.5	0.00383877	0.00384468	0.00153787
GOTERM_BP_DIRECT	GO:0015942~formate metabolic process	2	100	0.000833333	O34720, Q795Y4	2	2	2400	1200	0.00166597	0.000833333	0.000833333
INTERPRO	IPR001041:2Fe-2S ferredoxin-type domain	2	100	0.00110223	O34720, Q795Y4	2	4	3629	907.25	0.0109678	0.00241113	0.00241113
UP_SEQ_FEATURE	metal ion-binding site:Iron-sulfur 2 (4Fe-4S)	2	100	0.00148994	O34720, Q795Y4	2	6	4027	671.167	0.0162678	0.00198659	0.00198659
UP_SEQ_FEATURE	domain:4Fe-4S ferredoxin-type 2	2	100	0.00148994	O34720, Q795Y4	2	6	4027	671.167	0.0162678	0.00198659	0.00198659
UP_SEQ_FEATURE	domain:4Fe-4S ferredoxin-type 1	2	100	0.00148994	O34720, Q795Y4	2	6	4027	671.167	0.0162678	0.00198659	0.00198659
INTERPRO	IPR006963:Molybdopterin oxidoreductase, 4Fe-4S domain	2	100	0.00165335	O34720, Q795Y4	2	6	3629	604.833	0.016411	0.00241113	0.00241113
INTERPRO	IPR006656:Molybdopterin oxidoreductase	2	100	0.00165335	O34720, Q795Y4	2	6	3629	604.833	0.016411	0.00241113	0.00241113
INTERPRO	IPR006657:Molydopterin dinucleotide-binding domain	2	100	0.00165335	O34720, Q795Y4	2	6	3629	604.833	0.016411	0.00241113	0.00241113
INTERPRO	IPR017900:4Fe-4S ferredoxin, iron-sulphur binding, conserved site	2	100	0.00192891	O34720, Q795Y4	2	7	3629	518.429	0.0191225	0.00241113	0.00241113
INTERPRO	IPR009010:Aspartate decarboxylase-like domain	2	100	0.00192891	O34720, Q795Y4	2	7	3629	518.429	0.0191225	0.00241113	0.00241113
UP_KEYWORDS	2Fe-2S	2	100	0.00240038	O34720, Q795Y4	2	10	4166	416.6	0.0190425	0.00960154	0.00960154
UP_KEYWORDS	Molybdenum	2	100	0.00240038	O34720, Q795Y4	2	10	4166	416.6	0.0190425	0.00960154	0.00960154
SMART	SM00929:SM00929	2	100	0.00246914	O34720, Q795Y4	2	2	810	405	0.00493217	0.00493827	0.00493827
INTERPRO	IPR017896:4Fe-4S ferredoxin-type, iron-sulpur binding domain	2	100	0.00248002	O34720, Q795Y4	2	9	3629	403.222	0.0245253	0.00275558	0.00275558
GOTERM_MF_DIRECT	GO:0030151~molybdenum ion binding	2	100	0.00307574	O34720, Q795Y4	2	8	2601	325.125	0.0152844	0.00768935	0.00307574
PIR_SUPERFAMILY	PIRSF036643:formate dehydrogenase, alpha subunit	2	100	0.0033557	O34720, Q795Y4	2	2	596	298	0.0033557	0.0033557	0.0033557
GOTERM_MF_DIRECT	GO:0051537~2 iron, 2 sulfur cluster binding	2	100	0.00538255	O34720, Q795Y4	2	14	2601	185.786	0.0266246	0.00897091	0.00538255
SMART	SM00926:SM00926	2	100	0.00740741	O34720, Q795Y4	2	6	810	135	0.0147599	0.00740741	0.00740741
UP_KEYWORDS	4Fe-4S	2	100	0.0100816	O34720, Q795Y4	2	42	4166	99.1905	0.0778637	0.0268843	0.0268843
GOTERM_MF_DIRECT	GO:0009055~electron carrier activity	2	100	0.0119185	O34720, Q795Y4	2	31	2601	83.9032	0.0581888	0.0148981	0.0119185
UP_KEYWORDS	Iron-sulfur	2	100	0.0136822	O34720, Q795Y4	2	57	4166	73.0877	0.104357	0.0273644	0.0273644
GOTERM_MF_DIRECT	GO:0051539~4 iron, 4 sulfur cluster binding	2	100	0.0176855	O34720, Q795Y4	2	46	2601	56.5435	0.0853546	0.0176855	0.0176855
KEGG_PATHWAY	bsu00680:Methane metabolism	2	100	0.0191131	O34720, Q795Y4	2	25	1308	52.32	0.0919818	0.0592508	0.0237003
KEGG_PATHWAY	bsu00630:Glyoxylate and dicarboxylate metabolism	2	100	0.0237003	O34720, Q795Y4	2	31	1308	42.1935	0.113016	0.0592508	0.0237003
UP_KEYWORDS	Iron	2	100	0.0319251	O34720, Q795Y4	2	133	4166	31.3233	0.228614	0.0510802	0.0510802
UP_KEYWORDS	Oxidoreductase	2	100	0.0700912	O34720, Q795Y4	2	292	4166	14.2671	0.440857	0.093455	0.093455
KEGG_PATHWAY	bsu01200:Carbon metabolism	2	100	0.074159	O34720, Q795Y4	2	97	1308	13.4845	0.319729	0.123598	0.074159
Spectral Depth 1000; Flagellar basal body base Module
Category	Term	Count	%	PValue	Genes	List Total	Pop Hits	Pop Total	Fold Enrichment	Bonferroni	Benjamini	FDR
KEGG_PATHWAY	bsu02040:Flagellar assembly	2	100	0.0252294	P35620, P23447	2	33	1308	39.6364	0.0252294	0.0252294	0.0252294
Spectral Depth 1000; Flagellar Rotation Module
Category	Term	Count	%	PValue	Genes	List Total	Pop Hits	Pop Total	Fold Enrichment	Bonferroni	Benjamini	FDR
KEGG_PATHWAY	bsu02030:Bacterial chemotaxis	4	100	5.4392e-06	P39064, P39063, P28611, P28612	4	24	1308	54.5	1.63175e-05	1.63176e-05	1.08784e-05
KEGG_PATHWAY	bsu02040:Flagellar assembly	4	100	1.46622e-05	P39064, P39063, P28611, P28612	4	33	1308	39.6364	4.3986e-05	2.19933e-05	1.46622e-05
UP_SEQ_FEATURE	topological domain:Cytoplasmic	4	100	1.77381e-05	P39064, P39063, P28611, P28612	4	106	4027	37.9906	0.00012416	0.000141905	0.000141905
GOTERM_MF_DIRECT	GO:0008565~protein transporter activity	2	50	0.0011534	P39063, P28611	2	3	2601	867	0.0011534	0.0011534	0.0011534
UP_SEQ_FEATURE	domain:OmpA-like	2	50	0.00148957	P39064, P28612	4	2	4027	1006.75	0.0103805	0.00595829	0.00595829
INTERPRO	IPR000540:Flagellar motor protein MotA, conserved site	2	50	0.00165289	P39063, P28611	4	2	3629	907.25	0.00823719	0.00165289	0.00165289
INTERPRO	IPR002898:MotA/TolQ/ExbB proton channel	2	50	0.00165289	P39063, P28611	4	2	3629	907.25	0.00823719	0.00165289	0.00165289
INTERPRO	IPR022522:Flagellar motor stator, MotA	2	50	0.00165289	P39063, P28611	4	2	3629	907.25	0.00823719	0.00165289	0.00165289
INTERPRO	IPR006665:Outer membrane protein, OmpA/MotB, C-terminal	2	50	0.00165289	P39064, P28612	4	2	3629	907.25	0.00823719	0.00165289	0.00165289
INTERPRO	IPR025713:Motility protein B, N-terminal domain	2	50	0.00165289	P39064, P28612	4	2	3629	907.25	0.00823719	0.00165289	0.00165289
UP_KEYWORDS	Flagellar rotation	2	50	0.00431551	P28611, P28612	4	6	4166	347.167	0.0381758	0.0310831	0.0310831
GOTERM_BP_DIRECT	GO:0071978~bacterial-type flagellum-dependent swarming motility	2	50	0.0112125	P39063, P28611	4	9	2400	133.333	0.0654173	0.0560626	0.0560626
UP_SEQ_FEATURE	transmembrane region	4	100	0.012526	P39064, P39063, P28611, P28612	4	936	4027	4.30235	0.0844551	0.0334027	0.0334027
UP_KEYWORDS	Transmembrane	4	100	0.0131066	P39064, P39063, P28611, P28612	4	983	4166	4.23805	0.11196	0.0310831	0.0310831
UP_KEYWORDS	Transmembrane helix	4	100	0.0131066	P39064, P39063, P28611, P28612	4	983	4166	4.23805	0.11196	0.0310831	0.0310831
UP_KEYWORDS	Chemotaxis	2	50	0.0150499	P28611, P28612	4	21	4166	99.1905	0.127575	0.0310831	0.0310831
UP_KEYWORDS	Cell membrane	4	100	0.0174836	P39064, P39063, P28611, P28612	4	1082	4166	3.85028	0.146786	0.0310831	0.0310831
UP_KEYWORDS	Membrane	4	100	0.0207221	P39064, P39063, P28611, P28612	4	1145	4166	3.63843	0.171765	0.0310831	0.0310831
GOTERM_BP_DIRECT	GO:0006935~chemotaxis	2	50	0.0248025	P28611, P28612	4	20	2400	60	0.139887	0.0620062	0.0620062
UP_KEYWORDS	Transport	3	75	0.0426345	P39064, P39063, P28611	4	519	4166	6.02023	0.324384	0.0548158	0.0548158
GOTERM_CC_DIRECT	GO:0016021~integral component of membrane	4	100	0.0614842	P39064, P39063, P28611, P28612	4	863	2185	2.53187	0.119188	0.0843992	0.0843992
UP_SEQ_FEATURE	topological domain:Extracellular	2	50	0.0733885	P39064, P28612	4	101	4027	19.9356	0.413479	0.146777	0.146777
GOTERM_CC_DIRECT	GO:0005886~plasma membrane	4	100	0.0843992	P39064, P39063, P28611, P28612	4	959	2185	2.27842	0.161675	0.0843992	0.0843992
Spectral Depth 1000; Flagellar hook and distal basal body Module
Category	Term	Count	%	PValue	Genes	List Total	Pop Hits	Pop Total	Fold Enrichment	Bonferroni	Benjamini	FDR
INTERPRO	IPR010930:Flagellar basal-body/hook protein, C-terminal domain	4	100	1.25646e-09	P39753, P39752, P23446, P39810	4	5	3629	725.8	7.53877e-09	5.02585e-09	5.02585e-09
INTERPRO	IPR001444:Flagellar basal body rod protein, N-terminal	4	100	2.51292e-09	P39753, P39752, P23446, P39810	4	6	3629	604.833	1.50775e-08	5.02585e-09	5.02585e-09
INTERPRO	IPR019776:Flagellar basal body rod protein, conserved site	4	100	2.51292e-09	P39753, P39752, P23446, P39810	4	6	3629	604.833	1.50775e-08	5.02585e-09	5.02585e-09
GOTERM_CC_DIRECT	GO:0009424~bacterial-type flagellum hook	4	100	6.91154e-08	P39753, P39752, P23446, P39810	4	10	2185	218.5	2.07346e-07	2.07346e-07	2.07346e-07
KEGG_PATHWAY	bsu02040:Flagellar assembly	4	100	1.46622e-05	P39753, P39752, P23446, P39810	4	33	1308	39.6364	1.46622e-05	1.46622e-05	1.46622e-05
GOTERM_BP_DIRECT	GO:0071978~bacterial-type flagellum-dependent swarming motility	3	75	3.74426e-05	P39753, P39752, P23446	4	9	2400	200	0.000149762	0.00014977	0.00014977
INTERPRO	IPR020013:Fagellar hook-basal body protein, FlgE/F/G	2	50	0.00165289	P39753, P23446	4	2	3629	907.25	0.00987646	0.00247934	0.00247934
COG_ONTOLOGY	Cell motility and secretion	2	50	0.00236967	P39753, P39752	2	2	844	422	0.00473372	0.00236967	0.00236967
UP_KEYWORDS	Bacterial flagellum	2	50	0.0100502	P23446, P39810	4	14	4166	148.786	0.0395987	0.0286734	0.0286734
UP_KEYWORDS	Bacterial flagellum biogenesis	2	50	0.0143367	P39753, P39752	4	20	4166	104.15	0.0561253	0.0286734	0.0286734
GOTERM_BP_DIRECT	GO:0044781~bacterial-type flagellum organization	2	50	0.0174053	P39753, P39752	4	14	2400	85.7143	0.0678246	0.0348107	0.0348107
Spectral Depth 1000; Filament Module
Category	Term	Count	%	PValue	Genes	List Total	Pop Hits	Pop Total	Fold Enrichment	Bonferroni	Benjamini	FDR
INTERPRO	IPR001029:Flagellin, D0/D1 domain	3	100	4.55719e-07	O34366, P02968, P96501	3	3	3629	1209.67	1.36716e-06	1.36716e-06	1.36716e-06
GOTERM_MF_DIRECT	GO:0005198~structural molecule activity	3	100	4.43616e-06	O34366, P02968, P96501	3	6	2601	433.5	4.43616e-06	4.43616e-06	4.43616e-06
UP_KEYWORDS	Bacterial flagellum	3	100	1.04891e-05	O34366, P02968, P96501	3	14	4166	297.571	3.14669e-05	3.14672e-05	3.14672e-05
GOTERM_BP_DIRECT	GO:0071973~bacterial-type flagellum-dependent cell motility	3	100	2.70946e-05	O34366, P02968, P96501	3	13	2400	184.615	5.41885e-05	2.70946e-05	2.70946e-05
KEGG_PATHWAY	bsu02040:Flagellar assembly	3	100	0.000617704	O34366, P02968, P96501	3	33	1308	39.6364	0.00123503	0.00123541	0.00123541
UP_KEYWORDS	Secreted	2	66.6667	0.0413355	P02968, P96501	3	87	4166	31.9234	0.118951	0.0620032	0.0620032
GOTERM_CC_DIRECT	GO:0005576~extracellular region	2	66.6667	0.0842093	P02968, P96501	3	94	2185	15.4965	0.355859	0.421046	0.421046
Spectral Depth 1000; Flagellar proximal basal body Module
Category	Term	Count	%	PValue	Genes	List Total	Pop Hits	Pop Total	Fold Enrichment	Bonferroni	Benjamini	FDR
KEGG_PATHWAY	bsu02040:Flagellar assembly	8	100	3.34039e-12	P35528, P24501, P24502, P35537, P23453, P35535, P23455, P24500	8	33	1308	39.6364	6.68088e-12	6.68077e-12	6.68077e-12
UP_KEYWORDS	Bacterial flagellum	6	75	4.01553e-12	P24501, P24502, P35537, P23453, P35535, P24500	8	14	4166	223.179	4.41712e-11	4.41708e-11	4.41708e-11
GOTERM_CC_DIRECT	GO:0009425~bacterial-type flagellum basal body	5	62.5	2.57544e-09	P35528, P24502, P35537, P23453, P35535	8	8	2185	170.703	1.54526e-08	1.54526e-08	1.54526e-08
GOTERM_BP_DIRECT	GO:0071978~bacterial-type flagellum-dependent swarming motility	3	37.5	0.000260064	P24501, P23455, P24500	8	9	2400	100	0.00207862	0.00182045	0.00182045
GOTERM_CC_DIRECT	GO:0009424~bacterial-type flagellum hook	3	37.5	0.000391242	P24501, P23455, P24500	8	10	2185	81.9375	0.00234516	0.00117373	0.00117373
GOTERM_MF_DIRECT	GO:0003774~motor activity	2	25	0.00192234	P24502, P23453	2	5	2601	520.2	0.00384098	0.00384468	0.00384468
GOTERM_CC_DIRECT	GO:0030694~bacterial-type flagellum basal body, rod	2	25	0.0095846	P24501, P24500	8	3	2185	182.083	0.0561471	0.0191692	0.0191692
INTERPRO	IPR019776:Flagellar basal body rod protein, conserved site	2	25	0.0115257	P24501, P24500	8	6	3629	151.208	0.15961	0.0864426	0.0864426
INTERPRO	IPR001444:Flagellar basal body rod protein, N-terminal	2	25	0.0115257	P24501, P24500	8	6	3629	151.208	0.15961	0.0864426	0.0864426
GOTERM_BP_DIRECT	GO:0009306~protein secretion	2	25	0.0288402	P35528, P35535	8	10	2400	60	0.208729	0.056245	0.056245
GOTERM_BP_DIRECT	GO:0044780~bacterial-type flagellum assembly	2	25	0.0288402	P35537, P35535	8	10	2400	60	0.208729	0.056245	0.056245
UP_KEYWORDS	Bacterial flagellum biogenesis	2	25	0.0331488	P35528, P23455	8	20	4166	52.075	0.30983	0.182318	0.182318
GOTERM_BP_DIRECT	GO:0071973~bacterial-type flagellum-dependent cell motility	2	25	0.037352	P24502, P23453	8	13	2400	46.1538	0.262537	0.056245	0.056245
GOTERM_BP_DIRECT	GO:0044781~bacterial-type flagellum organization	2	25	0.040175	P35528, P23455	8	14	2400	42.8571	0.279662	0.056245	0.056245
