# Supplementary material for: Defining hierarchical protein interaction networks from spectral analysis of bacterial proteomes
Source: eLife. 2022 Aug 17;11:e74104. doi: 10.7554/eLife.74104 (PMC9427106; doi:10.7554/eLife.74104)
Supplement: Supplementary file 4. [file elife-74104-supp4.xlsx]

## Sheet: Overview
Supplementary File 4: Data related to Figure 6--Figure Supplement 4
Tab	Contents
Spectral Depth Table	Hierarchically clustered spectral depth matrix for E. coli K12 proteins coevolving with HisG
Metadata	Protein accession and other associated metadata
Module_designations	Accessions of proteins assigned to each module in the statistical hierarchy
SDX	Adjacency matrix generated by thresholding the hierarchically clustered spectral depth matrix to spectral depth 'X'
David_Output_SDX	Output table for gene set enrichment analysis of the sets of proteins within each statistical module observed at a spectral depth of 'X' using David v6.8

## Sheet: Spectral Depth Table
UniprotID	Node Label	ThrA	MetL	LysC	IlvH	IlvN	LeuC	LeuD	IlvC	ArgG	HisB	HisA	HisI	HisG	HisH	HisF	HisD	ArgA	ArgB	ArgC	ArgH	TrpE	PabB	PabA	TrpD	YbiB	TrpF	TrpA	TrpB	ArgD	PatA	ArGM	ThiS	ThiG	ThiE	ThrB	ThrC	LeuB	DmlA	CarB	CarA	GltB	ProA	ProB	ProC	MetA	DapB	FolK	AroB
P00561	ThrA	3000	3000	3000	51	51	100	51	368	249	162	165	224	167	162	159	118	51	167	235	118	108	108	51	109	115	56	108	162	114	114	114	51	99	99	438	223	56	56	172	112	113	109	107	116	176	60	58	51
P00562	MetL	3000	3000	3000	51	51	100	51	368	249	162	165	224	167	162	159	118	51	167	235	118	108	108	51	109	115	56	108	162	114	114	114	51	99	99	438	223	56	56	172	112	113	109	107	116	176	60	58	51
P08660	LysC	3000	3000	3000	51	51	51	51	172	161	150	51	108	108	139	108	68	51	51	108	54	51	51	51	51	51	51	51	51	56	56	56	51	51	51	252	51	51	51	108	51	108	82	51	116	51	51	51	51
P00894	IlvH	51	51	51	3000	3000	310	295	394	236	217	271	271	272	235	265	133	215	265	212	107	84	84	54	146	158	184	199	215	107	107	107	86	55	51	51	109	56	56	52	57	69	134	110	81	51	60	51	65
P0ADF8	IlvN	51	51	51	3000	3000	310	295	394	236	217	271	271	272	235	265	133	215	265	212	107	84	84	54	146	158	184	199	215	107	107	107	86	55	51	51	109	56	56	52	57	69	134	110	81	51	60	51	65
P0A6A6	LeuC	100	100	51	310	310	3000	3000	288	224	107	107	257	271	224	107	109	213	231	221	137	51	51	51	53	132	221	214	109	51	51	51	51	51	51	51	107	230	230	51	51	71	188	110	51	51	51	51	51
P30126	LeuD	51	51	51	295	295	3000	3000	280	224	219	107	269	271	224	214	109	219	271	224	139	51	51	51	185	122	224	201	107	51	51	51	51	51	51	51	107	229	229	51	51	51	188	111	51	51	51	51	51
P05793	IlvC	368	368	172	394	394	288	280	3000	319	325	280	281	290	306	280	165	272	280	254	230	108	108	51	187	174	271	225	276	107	107	107	100	98	100	324	275	197	197	65	65	106	238	270	104	233	65	84	93
P0A6E4	ArgG	249	249	161	236	236	224	224	319	3000	347	343	368	379	361	347	159	280	322	317	279	108	108	107	167	161	272	224	218	113	113	113	100	99	100	134	188	189	189	107	207	167	188	171	118	208	100	86	88
P06987	HisB	162	162	150	217	217	107	219	325	347	3000	1242	825	1236	529	503	461	109	287	276	107	113	113	163	199	203	293	347	300	88	88	88	51	51	53	151	108	109	109	163	163	53	115	109	120	51	116	84	88
P10371	HisA	165	165	51	271	271	107	107	280	343	1242	3000	861	1300	839	839	358	109	286	280	107	107	107	212	214	203	297	420	312	107	107	107	54	53	53	108	62	111	111	77	102	65	110	108	108	54	93	86	81
P06989	HisI	224	224	108	271	271	257	269	281	368	825	861	3000	1341	869	883	347	283	319	300	228	107	107	164	224	225	312	346	332	218	218	218	100	82	100	213	109	149	149	100	175	100	153	135	113	204	101	74	98
P60757	HisG	167	167	108	272	272	271	271	290	379	1236	1300	1341	3000	839	841	536	280	343	303	249	108	108	199	216	212	347	430	352	212	212	212	100	86	100	165	109	167	167	107	205	103	159	130	110	203	108	86	100
P60595	HisH	162	162	139	235	235	224	224	306	361	529	839	869	839	3000	3000	346	278	336	303	134	200	200	179	216	211	288	347	325	246	246	246	53	53	82	177	109	115	115	168	169	104	113	110	121	203	108	66	89
P60664	HisF	159	159	108	265	265	107	214	280	347	503	839	883	841	3000	3000	347	280	343	304	109	165	165	163	211	211	292	347	337	224	224	224	55	54	82	51	108	62	62	162	160	67	108	108	110	187	116	85	88
P06988	HisD	118	118	68	133	133	109	109	165	159	461	358	347	536	346	347	3000	144	271	164	107	75	75	51	107	109	165	201	109	108	108	108	51	51	53	52	98	151	151	108	150	125	115	110	98	147	100	67	55
P0A6C5	ArgA	51	51	51	215	215	213	219	272	280	109	109	283	280	278	280	144	3000	3000	378	225	56	56	51	100	120	122	109	101	149	149	149	51	51	51	51	95	54	54	161	98	100	107	107	93	51	51	53	51
P0A6C8	ArgB	167	167	51	265	265	231	271	280	322	287	286	319	343	336	343	271	3000	3000	2418	229	84	84	51	108	121	212	187	272	150	150	150	86	55	54	51	117	111	111	107	103	107	181	165	100	51	51	58	56
P11446	ArgC	235	235	108	212	212	221	224	254	317	276	280	300	303	303	304	164	378	2418	3000	258	106	106	107	162	156	257	186	212	186	186	186	104	57	83	162	110	173	173	113	168	102	187	171	103	167	60	67	88
P11447	ArgH	118	118	54	107	107	137	139	230	279	107	107	228	249	134	109	107	225	229	258	3000	51	51	51	98	107	100	101	95	107	107	107	51	51	90	102	109	163	163	67	76	83	108	107	88	98	107	58	65
P00895	TrpE	108	108	51	84	84	51	51	108	108	113	107	107	108	200	165	75	56	84	106	51	3000	3000	2788	1762	403	399	427	364	84	84	84	54	75	56	51	51	51	51	82	78	67	87	101	100	51	84	65	105
P05041	PabB	108	108	51	84	84	51	51	108	108	113	107	107	108	200	165	75	56	84	106	51	3000	3000	2788	1762	403	399	427	364	84	84	84	54	75	56	51	51	51	51	82	78	67	87	101	100	51	84	65	105
P00903	PabA	51	51	51	54	54	51	51	51	107	163	212	164	199	179	163	51	51	51	107	51	2788	2788	3000	3000	227	326	312	250	108	108	108	51	51	51	51	51	51	51	52	51	51	51	51	51	51	86	58	75
P00904	TrpD	109	109	51	146	146	53	185	187	167	199	214	224	216	216	211	107	100	108	162	98	1762	1762	3000	3000	3000	1357	986	360	113	113	113	55	55	51	51	51	51	51	107	86	53	107	109	104	51	100	61	67
P30177	YbiB	115	115	51	158	158	132	122	174	161	203	203	225	212	211	211	109	120	121	156	107	403	403	227	3000	3000	1358	1344	305	107	107	107	103	99	100	51	55	51	51	143	102	106	115	116	107	51	67	56	51
P00909	TrpF	56	56	51	184	184	221	224	271	272	293	297	312	347	288	292	165	122	212	257	100	399	399	326	1357	1358	3000	1708	1144	141	141	141	86	54	54	51	59	57	57	76	103	54	110	113	98	51	84	63	75
P0A877	TrpA	108	108	51	199	199	214	201	225	224	347	420	346	430	347	347	201	109	187	186	101	427	427	312	986	1344	1708	3000	2159	108	108	108	100	53	100	51	83	107	107	76	107	64	114	113	104	51	100	84	88
P0A879	TrpB	162	162	51	215	215	109	107	276	218	300	312	332	352	325	337	109	101	272	212	95	364	364	250	360	305	1144	2159	3000	109	109	109	86	72	99	51	59	51	51	74	100	87	115	110	104	51	74	83	74
P18335	ArgD	114	114	56	107	107	51	51	107	113	88	107	218	212	246	224	108	149	150	186	107	84	84	108	113	107	141	108	109	3000	3000	3000	51	51	51	88	57	56	56	67	54	65	51	51	63	51	51	51	57
P42588	PatA	114	114	56	107	107	51	51	107	113	88	107	218	212	246	224	108	149	150	186	107	84	84	108	113	107	141	108	109	3000	3000	3000	51	51	51	88	57	56	56	67	54	65	51	51	63	51	51	51	57
P77581	ArGM	114	114	56	107	107	51	51	107	113	88	107	218	212	246	224	108	149	150	186	107	84	84	108	113	107	141	108	109	3000	3000	3000	51	51	51	88	57	56	56	67	54	65	51	51	63	51	51	51	57
O32583	ThiS	51	51	51	86	86	51	51	100	100	51	54	100	100	53	55	51	51	86	104	51	54	54	51	55	103	86	100	86	51	51	51	3000	2404	1260	51	51	51	51	52	55	53	53	51	54	51	77	51	51
P30139	ThiG	99	99	51	55	55	51	51	98	99	51	53	82	86	53	54	51	51	55	57	51	75	75	51	55	99	54	53	72	51	51	51	2404	3000	1221	51	51	51	51	53	111	53	51	51	55	51	71	58	51
P30137	ThiE	99	99	51	51	51	51	51	100	100	53	53	100	100	82	82	53	51	54	83	90	56	56	51	51	100	54	100	99	51	51	51	1260	1221	3000	51	51	51	51	52	54	53	54	57	72	51	99	72	51
P00547	ThrB	438	438	252	51	51	51	51	324	134	151	108	213	165	177	51	52	51	51	162	102	51	51	51	51	51	51	51	51	88	88	88	51	51	51	3000	108	173	173	52	51	51	51	52	57	51	51	51	56
P00934	ThrC	223	223	51	109	109	107	107	275	188	108	62	109	109	109	108	98	95	117	110	109	51	51	51	51	55	59	83	59	57	57	57	51	51	51	108	3000	107	107	51	51	51	63	52	54	51	51	63	51
P30125	LeuB	56	56	51	56	56	230	229	197	189	109	111	149	167	115	62	151	54	111	173	163	51	51	51	51	51	57	107	51	56	56	56	51	51	51	173	107	3000	3000	51	51	51	51	51	51	51	51	51	51
P76251	DmlA	56	56	51	56	56	230	229	197	189	109	111	149	167	115	62	151	54	111	173	163	51	51	51	51	51	57	107	51	56	56	56	51	51	51	173	107	3000	3000	51	51	51	51	51	51	51	51	51	51
P00968	CarB	172	172	108	52	52	51	51	65	107	163	77	100	107	168	162	108	161	107	113	67	82	82	52	107	143	76	76	74	67	67	67	52	53	52	52	51	51	51	3000	491	153	76	92	86	54	77	51	51
P0A6F1	CarA	112	112	51	57	57	51	51	65	207	163	102	175	205	169	160	150	98	103	168	76	78	78	51	86	102	103	107	100	54	54	54	55	111	54	51	51	51	51	491	3000	57	76	89	108	51	122	67	51
P09831	GltB	113	113	108	69	69	71	51	106	167	53	65	100	103	104	67	125	100	107	102	83	67	67	51	53	106	54	64	87	65	65	65	53	53	53	51	51	51	51	153	57	3000	107	108	51	51	51	51	51
P07004	ProA	109	109	82	134	134	188	188	238	188	115	110	153	159	113	108	115	107	181	187	108	87	87	51	107	115	110	114	115	51	51	51	53	51	54	51	63	51	51	76	76	107	3000	2879	136	127	67	51	92
P0A7B5	ProB	107	107	51	110	110	110	111	270	171	109	108	135	130	110	108	110	107	165	171	107	101	101	51	109	116	113	113	110	51	51	51	51	51	57	52	52	51	51	92	89	108	2879	3000	211	111	69	51	84
P0A9L8	ProC	116	116	116	81	81	51	51	104	118	120	108	113	110	121	110	98	93	100	103	88	100	100	51	104	107	98	104	104	63	63	63	54	55	72	57	54	51	51	86	108	51	136	211	3000	83	100	56	75
P07623	MetA	176	176	51	51	51	51	51	233	208	51	54	204	203	203	187	147	51	51	167	98	51	51	51	51	51	51	51	51	51	51	51	51	51	51	51	51	51	51	54	51	51	127	111	83	3000	60	51	51
P04036	DapB	60	60	51	60	60	51	51	65	100	116	93	101	108	108	116	100	51	51	60	107	84	84	86	100	67	84	100	74	51	51	51	77	71	99	51	51	51	51	77	122	51	67	69	100	60	3000	100	102
P26281	FolK	58	58	51	51	51	51	51	84	86	84	86	74	86	66	85	67	53	58	67	58	65	65	58	61	56	63	84	83	51	51	51	51	58	72	51	63	51	51	51	67	51	51	51	56	51	100	3000	84
P07639	AroB	51	51	51	65	65	51	51	93	88	88	81	98	100	89	88	55	51	56	88	65	105	105	75	67	51	75	88	74	57	57	57	51	51	51	56	51	51	51	51	51	51	92	84	75	51	102	84	3000
P12008	AroC	82	82	57	67	67	51	51	108	110	107	100	107	107	107	106	98	55	88	107	88	75	75	67	69	67	86	101	82	56	56	56	51	51	66	82	101	51	51	74	71	53	86	74	75	51	104	106	179
P62615	IspE	67	67	51	59	59	51	51	89	102	88	85	84	88	84	82	76	53	97	88	107	51	51	51	51	56	58	53	51	51	51	51	60	70	70	88	107	53	53	63	67	51	88	85	54	56	92	82	63
P0ABQ0	CoaBC	51	51	51	51	51	51	51	51	66	55	57	66	100	64	55	51	51	51	56	57	82	82	74	74	56	84	100	57	52	52	52	51	51	51	51	51	51	51	66	55	51	59	54	51	51	81	51	100
P15640	PurD	65	65	151	51	51	51	51	52	92	88	56	74	88	88	82	51	52	74	88	74	74	74	55	76	51	110	55	51	82	82	82	51	51	51	76	52	51	51	52	56	51	69	72	56	51	56	53	117
P08178	PurM	108	108	56	86	86	56	59	107	114	107	106	101	107	106	101	85	65	100	107	107	75	75	56	76	74	86	100	100	57	57	57	55	58	75	108	107	56	56	74	260	51	99	86	89	68	115	150	145
P0AG18	PurE	102	102	51	100	100	54	59	107	107	107	102	108	107	107	101	85	66	107	107	102	74	74	68	78	67	96	105	100	54	54	54	52	56	73	82	108	51	51	65	249	51	100	88	102	107	107	148	135
P0A7D7	PurC	58	58	51	59	59	51	51	85	100	98	100	88	88	87	87	68	51	54	89	107	54	54	52	54	51	58	74	67	51	51	51	51	51	72	80	59	58	58	54	68	51	67	66	57	54	114	116	108
P15639	PurH	118	118	51	67	67	51	51	89	106	88	83	67	88	100	88	75	51	72	90	98	56	56	51	83	68	86	84	74	51	51	51	51	51	67	51	52	51	51	74	107	51	74	74	67	51	78	106	75
P0AG16	PurF	113	113	51	67	67	51	51	85	112	108	107	107	107	107	107	108	65	100	101	67	84	84	51	56	54	58	67	53	58	58	58	52	55	53	51	54	51	51	166	168	59	99	76	115	83	67	107	108
P08244	PyrF	113	113	66	59	59	51	51	107	103	86	90	100	91	90	87	68	51	67	94	87	51	51	51	54	51	56	82	86	51	51	51	51	51	68	117	100	51	51	62	74	51	86	74	88	133	109	141	107
P0A7E3	PyrE	107	107	51	59	59	54	65	107	87	82	78	68	91	88	83	68	66	74	100	100	51	51	51	51	51	54	74	72	51	51	51	51	51	83	51	85	51	51	67	92	51	71	65	78	98	93	100	88
P07023	TyrA	108	108	51	105	105	77	99	225	114	98	104	148	113	106	107	100	103	107	153	101	103	103	82	98	79	107	107	100	56	56	56	51	51	57	51	51	52	52	61	67	67	107	107	98	78	67	68	116
P0A9J8	PheA	108	108	51	145	145	77	101	269	232	106	109	267	260	238	267	107	107	258	232	100	182	182	103	167	107	162	162	107	56	56	56	51	52	80	51	51	51	51	51	66	53	117	115	107	51	80	61	146
P09151	LeuA	51	51	51	107	107	226	226	54	51	54	51	53	107	58	56	51	52	56	109	51	53	53	51	107	106	73	124	134	73	73	73	51	51	51	51	51	54	54	51	51	53	55	54	51	51	51	51	51
P51020	MhpE	51	51	51	107	107	226	226	54	51	54	51	53	107	58	56	51	52	56	109	51	53	53	51	107	106	73	124	134	73	73	73	51	51	51	51	51	54	54	51	51	53	55	54	51	51	51	51	51
P0A9Z1	GlnB	51	51	51	95	95	60	60	88	60	78	87	106	104	90	67	75	104	107	104	51	107	107	66	94	88	105	107	94	51	51	51	51	51	51	51	51	51	51	51	51	53	107	97	51	51	51	51	51
P0AC55	GlnK	51	51	51	95	95	60	60	88	60	78	87	106	104	90	67	75	104	107	104	51	107	107	66	94	88	105	107	94	51	51	51	51	51	51	51	51	51	51	51	51	53	107	97	51	51	51	51	51
P69681	AmtB	51	51	51	99	99	51	52	109	101	53	100	108	108	108	99	108	107	128	109	51	102	102	51	107	108	93	101	104	51	51	51	59	67	51	51	51	51	51	99	67	113	146	146	56	51	51	51	51
P04391	ArgI	86	86	51	95	95	67	84	124	146	108	113	146	125	124	107	93	61	148	131	78	51	51	51	51	51	51	55	54	51	51	51	51	51	51	71	141	53	53	51	51	51	109	129	84	61	51	51	52
P06960	ArgF	86	86	51	95	95	67	84	124	146	108	113	146	125	124	107	93	61	148	131	78	51	51	51	51	51	51	55	54	51	51	51	51	51	51	71	141	53	53	51	51	51	109	129	84	61	51	51	52
Q46803	YgeW	86	86	51	95	95	67	84	124	146	108	113	146	125	124	107	93	61	148	131	78	51	51	51	51	51	51	55	54	51	51	51	51	51	51	71	141	53	53	51	51	51	109	129	84	61	51	51	52
P0A738	MoaC	61	61	51	89	89	54	104	89	99	61	74	92	88	68	68	54	84	95	98	86	51	51	51	51	54	54	54	56	51	51	51	51	51	53	73	68	54	54	51	51	51	52	53	54	51	51	56	51
P30749	MoaE	51	51	51	89	89	53	54	87	99	54	81	89	88	79	72	57	89	94	94	98	51	51	51	52	67	54	54	61	51	51	51	51	51	51	69	55	53	53	51	51	51	55	54	54	51	51	51	51
P00963	AsnA	51	51	51	51	51	51	51	51	51	51	51	51	51	51	51	51	51	51	51	51	51	51	51	51	51	51	51	51	51	51	51	51	51	51	51	51	51	51	51	51	51	51	51	51	51	51	51	51
P0A853	TnaA	51	51	51	51	51	51	51	51	51	51	51	51	51	51	51	51	51	51	51	51	51	51	51	51	51	51	51	51	51	51	51	51	51	51	51	51	51	51	51	51	51	51	51	51	51	51	51	51
P42626	YhaM	51	51	51	51	51	51	51	51	51	51	51	51	51	51	51	51	51	51	51	51	51	51	51	51	51	51	51	51	51	51	51	51	51	51	51	51	51	51	51	51	51	51	51	51	51	51	51	51
P0A7Z0	RpiA	51	51	51	51	51	51	51	51	51	51	51	51	51	51	51	51	51	104	51	51	51	51	51	51	51	51	51	51	51	51	51	51	51	51	51	51	51	51	51	51	51	51	51	51	51	51	51	51
P28248	PaxA	51	51	51	51	51	51	51	57	65	81	65	81	74	74	68	51	51	67	54	51	51	51	51	51	51	53	100	52	51	51	51	51	51	51	51	52	51	51	51	76	51	51	51	51	51	51	51	51
P0AEZ1	MetF	51	51	51	86	86	51	51	117	62	51	62	51	87	66	67	101	51	54	60	51	51	51	51	51	53	54	71	66	51	51	51	55	51	51	51	51	51	51	51	51	59	69	67	52	51	51	51	51
P07650	DeoA	51	51	51	51	51	51	51	51	51	51	51	51	51	51	51	51	51	51	51	51	51	51	51	51	51	51	51	51	51	51	51	51	51	51	51	51	51	51	51	51	51	51	51	51	51	51	51	51
P0ABF6	Cdd	51	51	51	51	51	51	51	51	51	51	51	51	51	51	51	51	51	51	51	51	51	51	51	51	51	51	51	51	51	51	51	51	51	51	51	51	51	51	51	51	51	51	51	51	51	51	51	51
P45578	LuxS	51	51	51	51	51	51	51	153	88	51	51	51	51	51	51	51	51	51	51	51	51	51	51	51	51	51	132	153	51	51	51	51	51	51	176	51	51	51	51	51	51	51	51	52	71	51	51	51
P39391	YjiT	51	51	51	51	51	51	51	51	51	51	51	51	51	51	51	51	51	51	51	51	51	51	51	51	51	51	51	51	51	51	51	51	51	51	51	51	51	51	51	51	51	51	51	51	51	51	51	51
P77658	YnaA	51	51	51	51	51	51	51	51	51	51	51	51	51	51	51	51	51	51	51	51	51	51	51	51	51	51	51	51	51	51	51	51	51	51	51	51	51	51	51	51	51	51	51	51	51	51	51	51
P0ABH7	GltA	51	51	51	51	51	61	65	51	51	51	51	51	54	54	53	51	51	51	52	58	51	51	51	51	51	51	52	51	51	51	51	51	51	51	51	51	51	51	51	51	51	51	51	51	51	51	51	51
P31660	PrpC	51	51	51	51	51	61	65	51	51	51	51	51	54	54	53	51	51	51	52	58	51	51	51	51	51	51	52	51	51	51	51	51	51	51	51	51	51	51	51	51	51	51	51	51	51	51	51	51
P0ABK5	CysK	56	56	51	51	51	51	51	51	52	51	55	51	51	51	51	51	51	51	55	51	53	53	52	52	51	51	51	51	81	81	81	51	51	51	51	51	51	51	51	51	51	51	51	51	51	51	51	51
P16703	CysM	56	56	51	51	51	51	51	51	52	51	55	51	51	51	51	51	51	51	55	51	53	53	52	52	51	51	51	51	81	81	81	51	51	51	51	51	51	51	51	51	51	51	51	51	51	51	51	51
P0A6D5	YdiB	51	51	51	51	51	51	51	51	54	51	53	53	54	53	51	53	51	51	53	56	51	51	51	53	53	51	51	51	51	51	51	51	51	51	51	51	68	68	51	51	51	51	51	54	51	64	51	51
P15770	AroE	51	51	51	51	51	51	51	51	54	51	53	53	54	53	51	53	51	51	53	56	51	51	51	53	53	51	51	51	51	51	51	51	51	51	51	51	68	68	51	51	51	51	51	54	51	64	51	51
P0AD61	PykF	51	51	51	51	51	51	51	51	51	51	51	51	51	51	51	51	51	51	51	51	51	51	51	51	51	51	51	51	51	51	51	51	51	51	51	51	51	51	51	51	51	51	51	51	51	51	51	51
P21599	PykA	51	51	51	51	51	51	51	51	51	51	51	51	51	51	51	51	51	51	51	51	51	51	51	51	51	51	51	51	51	51	51	51	51	51	51	51	51	51	51	51	51	51	51	51	51	51	51	51
P0A9S5	GldA	51	51	51	51	51	51	51	51	51	51	51	51	51	51	51	51	51	51	51	51	51	51	51	51	51	51	51	51	51	51	51	51	51	51	51	51	51	51	51	51	51	51	52	51	54	55	51	51
P45579	HcxA	51	51	51	51	51	51	51	51	51	51	51	51	51	51	51	51	51	51	51	51	51	51	51	51	51	51	51	51	51	51	51	51	51	51	51	51	51	51	51	51	51	51	52	51	54	55	51	51
P07395	PheT	51	51	51	51	51	51	51	51	51	51	51	51	51	51	51	51	51	51	51	51	51	51	51	51	51	51	51	51	51	51	51	51	51	51	51	51	51	51	74	51	207	51	51	51	51	51	51	51
P0A8F8	UvrB	51	51	51	51	51	51	51	51	51	51	51	51	51	51	51	51	51	51	51	51	51	51	51	51	51	51	51	51	51	51	51	51	51	51	51	51	51	51	72	51	150	51	51	51	51	51	51	51
P60785	LepA	51	51	51	51	51	51	51	51	51	51	51	51	51	51	51	51	51	51	51	51	51	51	51	51	51	51	51	51	51	51	51	51	51	51	51	51	51	51	51	51	51	51	51	51	51	51	51	51
P08312	PheS	51	51	51	51	51	51	51	51	51	51	51	51	51	51	51	51	51	51	51	51	51	51	51	51	51	51	51	51	51	51	51	51	51	51	51	51	51	51	51	51	51	51	51	51	51	51	51	51
P42641	ObgE	51	51	51	51	51	51	51	51	51	51	51	51	51	51	51	51	51	51	51	51	51	51	51	51	51	51	51	51	51	51	51	51	51	51	51	51	51	51	51	51	51	51	51	51	51	51	51	51
P0A7V0	RpsB	51	51	51	51	51	51	51	51	51	51	51	51	51	51	51	51	51	51	51	51	51	51	51	51	51	51	51	51	51	51	51	51	51	51	51	51	51	51	51	51	51	51	51	51	51	51	51	51
P0AGJ9	TyrS	51	51	51	51	51	51	51	51	51	51	51	51	51	51	51	51	51	51	51	51	51	51	51	51	51	51	51	51	51	51	51	51	51	51	51	51	51	51	51	51	51	51	51	51	51	51	51	51
P0A8M3	ThrS	51	51	51	51	51	51	51	51	51	51	51	51	51	51	51	51	51	51	51	51	51	51	51	51	51	51	51	51	51	51	51	51	51	51	51	51	51	51	51	51	51	51	51	51	51	51	51	51
P0A799	Pgk	51	51	51	51	51	51	51	51	51	51	51	51	51	51	51	51	51	51	51	51	51	51	51	51	51	51	51	51	51	51	51	51	51	51	51	51	51	51	51	51	51	51	51	51	51	51	51	51
P11875	ArgS	51	51	51	51	51	51	51	51	51	51	51	51	51	51	51	51	51	51	51	51	51	51	51	51	51	51	51	51	51	51	51	51	51	51	51	51	51	51	51	51	51	51	51	51	51	51	51	51
P0AGA2	SecY	51	51	51	51	51	51	51	51	51	51	51	51	51	51	51	51	51	51	51	51	51	51	51	51	51	51	51	51	51	51	51	51	51	51	51	51	51	51	51	51	51	51	51	51	51	51	51	51
P0AES6	GyrB	51	51	51	51	51	51	51	51	51	51	51	51	51	51	51	51	51	51	51	51	51	51	51	51	51	51	51	51	51	51	51	51	51	51	51	51	51	51	51	51	51	51	51	51	51	51	51	51
P20083	ParE	51	51	51	51	51	51	51	51	51	51	51	51	51	51	51	51	51	51	51	51	51	51	51	51	51	51	51	51	51	51	51	51	51	51	51	51	51	51	51	51	51	51	51	51	51	51	51	51
P0A809	RuvA	51	51	51	51	51	51	51	51	51	51	51	51	51	51	51	51	51	51	51	51	51	51	51	51	51	51	51	51	51	51	51	51	51	51	51	51	51	51	51	51	51	51	51	51	51	51	51	51
P0A812	RuvB	51	51	51	51	51	51	51	51	51	51	51	51	51	51	51	51	51	51	51	51	51	51	51	51	51	51	51	51	51	51	51	51	51	51	51	51	51	51	59	51	56	51	51	51	51	51	51	51
P60340	TruB	51	51	51	51	51	51	51	51	51	51	51	51	51	51	51	51	51	51	51	51	51	51	51	51	51	51	51	51	51	51	51	51	51	51	51	51	51	51	51	51	51	51	51	51	51	51	51	51
P76256	YeaZ	51	51	51	51	51	51	51	51	51	51	51	51	51	51	51	51	51	51	51	51	51	51	51	51	51	51	51	51	51	51	51	51	51	51	51	51	51	51	51	51	51	51	51	51	51	51	51	51
P0A873	TrmD	51	51	51	51	51	51	51	51	51	51	51	51	51	51	51	51	51	51	51	51	51	51	51	51	51	51	51	51	51	51	51	51	51	51	51	51	51	51	51	51	51	51	51	51	51	51	51	51
P28630	HolA	51	51	51	51	51	51	51	51	51	51	51	51	51	51	51	51	51	51	51	51	51	51	51	51	51	51	51	51	51	51	51	51	51	51	51	51	51	51	51	51	51	51	51	51	51	51	51	51
P0AGD7	Ffh	51	51	51	51	51	51	51	51	51	51	51	51	51	51	51	51	51	51	51	51	51	51	51	51	51	51	51	51	51	51	51	51	51	51	51	51	51	51	51	51	51	51	51	51	51	51	51	51
P0ABU2	YchF	51	51	51	51	51	51	51	51	51	51	51	51	51	51	51	51	51	51	51	51	51	51	51	51	51	51	51	51	51	51	51	51	51	51	51	51	51	51	51	51	51	51	51	51	51	51	51	51
P10442	RnhB	51	51	51	51	51	51	51	51	51	51	51	51	51	51	51	51	51	51	51	51	51	51	51	51	51	51	51	51	51	51	51	51	51	51	51	51	51	51	51	51	51	51	51	51	51	51	51	51
P37443	ycaI	51	51	51	51	51	51	51	51	51	51	51	51	51	51	51	51	51	51	51	51	51	51	51	51	51	51	51	51	51	51	51	51	51	51	51	51	51	51	59	51	51	51	51	51	51	51	51	51
P0A6P7	EngB	51	51	51	51	51	51	51	51	51	51	51	51	51	51	51	51	51	51	51	51	51	51	51	51	51	51	51	51	51	51	51	51	51	51	51	51	51	51	51	51	51	51	51	51	51	51	51	51
P0A7L3	RplT	51	51	51	51	51	51	51	51	51	51	51	51	51	51	51	51	51	51	51	51	51	51	51	51	51	51	51	51	51	51	51	51	51	51	51	51	51	51	51	51	51	51	51	51	51	51	51	51
P0A7Y8	RnpA	51	51	51	51	51	51	51	51	51	51	51	51	51	51	51	51	51	51	51	51	51	51	51	51	51	51	51	51	51	51	51	51	51	51	51	51	51	51	51	51	51	51	51	51	51	51	51	51
P0A959	AlaA	51	51	51	54	54	63	91	54	129	51	108	77	107	100	100	100	51	51	102	116	51	51	51	53	56	53	51	51	53	53	53	51	51	51	51	51	53	53	76	83	51	100	100	123	51	67	51	51
P77434	AlaC	51	51	51	54	54	63	91	54	129	51	108	77	107	100	100	100	51	51	102	116	51	51	51	53	56	53	51	51	53	53	53	51	51	51	51	51	53	53	76	83	51	100	100	123	51	67	51	51
P77806	YbdL	51	51	51	54	54	63	91	54	129	51	108	77	107	100	100	100	51	51	102	116	51	51	51	53	56	53	51	51	53	53	53	51	51	51	51	51	53	53	76	83	51	100	100	123	51	67	51	51
P0A867	TalA	62	62	61	53	53	51	51	88	53	65	54	51	57	53	51	52	51	51	54	51	51	51	51	51	51	51	56	54	54	54	54	51	51	51	62	51	52	52	51	51	51	51	51	51	51	51	51	52
P32669	TalC	62	62	61	53	53	51	51	88	53	65	54	51	57	53	51	52	51	51	54	51	51	51	51	51	51	51	56	54	54	54	54	51	51	51	62	51	52	52	51	51	51	51	51	51	51	51	51	52
P78055	FsaA	62	62	61	53	53	51	51	88	53	65	54	51	57	53	51	52	51	51	54	51	51	51	51	51	51	51	56	54	54	54	54	51	51	51	62	51	52	52	51	51	51	51	51	51	51	51	51	52
P0A870	TalB	62	62	61	53	53	51	51	88	53	65	54	51	57	53	51	52	51	51	54	51	51	51	51	51	51	51	56	54	54	54	54	51	51	51	62	51	52	52	51	51	51	51	51	51	51	51	51	52
P31467	YieH	51	51	51	51	51	51	51	51	51	51	51	51	51	51	51	51	51	51	51	51	51	51	51	51	51	51	51	51	51	51	51	51	51	51	51	51	51	51	51	51	51	51	51	51	51	51	51	51
P77475	YqaB	51	51	51	51	51	51	51	51	51	51	51	51	51	51	51	51	51	51	51	51	51	51	51	51	51	51	51	51	51	51	51	51	51	51	51	51	51	51	51	51	51	51	51	51	51	51	51	51
P77625	HxpA	51	51	51	51	51	51	51	51	51	51	51	51	51	51	51	51	51	51	51	51	51	51	51	51	51	51	51	51	51	51	51	51	51	51	51	51	51	51	51	51	51	51	51	51	51	51	51	51
P77247	HxpB	51	51	51	51	51	51	51	51	51	51	51	51	51	51	51	51	51	51	51	51	51	51	51	51	51	51	51	51	51	51	51	51	51	51	51	51	51	51	51	51	51	51	51	51	51	51	51	51
P77366	PgmB	51	51	51	51	51	51	51	51	51	51	51	51	51	51	51	51	51	51	51	51	51	51	51	51	51	51	51	51	51	51	51	51	51	51	51	51	51	51	51	51	51	51	51	51	51	51	51	51
[truncated: 82 more columns]

## Sheet: Metadata
Uniprot ID	Node Label	Gene names	Protein names	Annotation	Gene ontology (biological process)	Cross-reference (KEGG)	Cross-reference (Pfam)	EnsemblBacteria transcript	Cross-reference (BioCyc)
P00561	ThrA	thrA thrA1 thrA2 b0002 JW0001	Bifunctional aspartokinase/homoserine dehydrogenase 1 (Aspartokinase I/homoserine dehydrogenase I) (AKI-HDI) [Includes: Aspartokinase (EC 2.7.2.4); Homoserine dehydrogenase (EC 1.1.1.3)]	5 out of 5	homoserine biosynthetic process [GO:0009090]; lysine biosynthetic process via diaminopimelate [GO:0009089]; threonine biosynthetic process [GO:0009088]	ecj:JW0001;eco:b0002;	PF00696;PF01842;PF13840;PF00742;PF03447;	AAC73113;BAB96579;	EcoCyc:ASPKINIHOMOSERDEHYDROGI-MONOMER;ECOL316407:JW0001-MONOMER;MetaCyc:ASPKINIHOMOSERDEHYDROGI-MONOMER;
P00562	MetL	metL metM b3940 JW3911	Bifunctional aspartokinase/homoserine dehydrogenase 2 (Aspartokinase II/homoserine dehydrogenase II) (AKII-HDII) [Includes: Aspartokinase (EC 2.7.2.4); Homoserine dehydrogenase (EC 1.1.1.3)]	5 out of 5	homoserine biosynthetic process [GO:0009090]; lysine biosynthetic process via diaminopimelate [GO:0009089]; methionine biosynthetic process [GO:0009086]; threonine biosynthetic process [GO:0009088]	ecj:JW3911;eco:b3940;	PF00696;PF00742;PF03447;	AAC76922;BAE77370;	EcoCyc:ASPKINIIHOMOSERDEHYDROGII-MONOMER;ECOL316407:JW3911-MONOMER;MetaCyc:ASPKINIIHOMOSERDEHYDROGII-MONOMER;
P08660	LysC	lysC apk b4024 JW3984	Lysine-sensitive aspartokinase 3 (EC 2.7.2.4) (Aspartate kinase III) (AKIII) (Lysine-sensitive aspartokinase III)	5 out of 5	homoserine biosynthetic process [GO:0009090]; lysine biosynthetic process via diaminopimelate [GO:0009089]	ecj:JW3984;eco:b4024;	PF00696;PF01842;	AAC76994;BAE78026;	EcoCyc:ASPKINIII-MONOMER;ECOL316407:JW3984-MONOMER;MetaCyc:ASPKINIII-MONOMER;
P00894	IlvH	ilvH brnP b0078 JW0077	Acetolactate synthase isozyme 3 small subunit (EC 2.2.1.6) (ALS-III) (Acetohydroxy-acid synthase III small subunit) (AHAS-III)	5 out of 5	isoleucine biosynthetic process [GO:0009097]; valine biosynthetic process [GO:0009099]	ecj:JW0077;eco:b0078;	PF10369;	AAC73189;BAB96647;	EcoCyc:ACETOLACTSYNIII-HCHAIN-MONOMER;ECOL316407:JW0077-MONOMER;MetaCyc:ACETOLACTSYNIII-HCHAIN-MONOMER;
P0ADF8	IlvN	ilvN b3670 JW3645	Acetolactate synthase isozyme 1 small subunit (EC 2.2.1.6) (Acetohydroxy-acid synthase I small subunit) (AHAS-I) (ALS-I)	4 out of 5	isoleucine biosynthetic process [GO:0009097]; valine biosynthetic process [GO:0009099]	ecj:JW3645;eco:b3670;	PF01842;	AAC76693;BAE77623;	EcoCyc:SMALLILVN-MONOMER;ECOL316407:JW3645-MONOMER;MetaCyc:SMALLILVN-MONOMER;
P0A6A6	LeuC	leuC b0072 JW0071	3-isopropylmalate dehydratase large subunit (EC 4.2.1.33) (Alpha-IPM isomerase) (IPMI) (Isopropylmalate isomerase)	4 out of 5	leucine biosynthetic process [GO:0009098]	ecj:JW0071;eco:b0072;	PF00330;	AAC73183;BAB96641;	EcoCyc:LEUC-MONOMER;ECOL316407:JW0071-MONOMER;MetaCyc:LEUC-MONOMER;
P30126	LeuD	leuD b0071 JW0070	3-isopropylmalate dehydratase small subunit (EC 4.2.1.33) (Alpha-IPM isomerase) (IPMI) (Isopropylmalate isomerase)	4 out of 5	leucine biosynthetic process [GO:0009098]	ecj:JW0070;eco:b0071;	PF00694;	AAC73182;BAB96640;	EcoCyc:LEUD-MONOMER;ECOL316407:JW0070-MONOMER;MetaCyc:LEUD-MONOMER;
P05793	IlvC	ilvC b3774 JW3747	Ketol-acid reductoisomerase (NADP(+)) (KARI) (EC 1.1.1.86) (Acetohydroxy-acid isomeroreductase) (AHIR) (Alpha-keto-beta-hydroxylacyl reductoisomerase) (Ketol-acid reductoisomerase type 2) (Ketol-acid reductoisomerase type II)	5 out of 5	branched-chain amino acid biosynthetic process [GO:0009082]; isoleucine biosynthetic process [GO:0009097]; protein homotetramerization [GO:0051289]; valine biosynthetic process [GO:0009099]	ecj:JW3747;eco:b3774;	PF01450;PF07991;	AAC76779;BAE77523;	EcoCyc:KETOLREDUCTOISOM-MONOMER;ECOL316407:JW3747-MONOMER;MetaCyc:KETOLREDUCTOISOM-MONOMER;
P0A6E4	ArgG	argG b3172 JW3140	Argininosuccinate synthase (EC 6.3.4.5) (Citrulline--aspartate ligase)	5 out of 5	arginine biosynthetic process [GO:0006526]; argininosuccinate metabolic process [GO:0000053]; urea cycle [GO:0000050]	ecj:JW3140;eco:b3172;	PF00764;	AAC76205;BAE77217;	EcoCyc:ARGSUCCINSYN-MONOMER;ECOL316407:JW3140-MONOMER;
P06987	HisB	hisB b2022 JW2004	Histidine biosynthesis bifunctional protein HisB [Includes: Histidinol-phosphatase (EC 3.1.3.15); Imidazoleglycerol-phosphate dehydratase (IGPD) (EC 4.2.1.19)]	4 out of 5	histidine biosynthetic process [GO:0000105]	ecj:JW2004;eco:b2022;	PF00475;PF08645;	AAC75083;BAA15853;	EcoCyc:IMIDPHOSPHADEHYDHISTIDPHOSPHA-MONOMER;ECOL316407:JW2004-MONOMER;MetaCyc:IMIDPHOSPHADEHYDHISTIDPHOSPHA-MONOMER;
P10371	HisA	hisA b2024 JW2006	1-(5-phosphoribosyl)-5-[(5-phosphoribosylamino)methylideneamino] imidazole-4-carboxamide isomerase (EC 5.3.1.16) (Phosphoribosylformimino-5-aminoimidazole carboxamide ribotide isomerase)	4 out of 5	cellular response to DNA damage stimulus [GO:0006974]; histidine biosynthetic process [GO:0000105]; tryptophan biosynthetic process [GO:0000162]	ecj:JW2006;eco:b2024;	PF00977;	AAC75085;BAA15855;	EcoCyc:PRIBFAICARPISOM-MONOMER;ECOL316407:JW2006-MONOMER;MetaCyc:PRIBFAICARPISOM-MONOMER;
P06989	HisI	hisI hisIE b2026 JW2008	Histidine biosynthesis bifunctional protein HisIE [Includes: Phosphoribosyl-AMP cyclohydrolase (PRA-CH) (EC 3.5.4.19); Phosphoribosyl-ATP pyrophosphatase (PRA-PH) (EC 3.6.1.31)]	4 out of 5	histidine biosynthetic process [GO:0000105]	ecj:JW2008;eco:b2026;	PF01502;PF01503;	AAC75087;BAA15858;	EcoCyc:HISTCYCLOPRATPPHOS;ECOL316407:JW2008-MONOMER;MetaCyc:HISTCYCLOPRATPPHOS;
P60757	HisG	hisG b2019 JW2001	ATP phosphoribosyltransferase (ATP-PRT) (ATP-PRTase) (EC 2.4.2.17)	4 out of 5	histidine biosynthetic process [GO:0000105]	ecj:JW2001;eco:b2019;	PF01634;PF08029;	AAC75080;BAA15850;	EcoCyc:ATPPHOSRIBOSTRANS-MONOMER;ECOL316407:JW2001-MONOMER;MetaCyc:ATPPHOSRIBOSTRANS-MONOMER;
P60595	HisH	hisH b2023 JW2005	Imidazole glycerol phosphate synthase subunit HisH (EC 4.3.2.10) (IGP synthase glutaminase subunit) (EC 3.5.1.2) (IGP synthase subunit HisH) (ImGP synthase subunit HisH) (IGPS subunit HisH)	5 out of 5	glutamine metabolic process [GO:0006541]; histidine biosynthetic process [GO:0000105]	ecj:JW2005;eco:b2023;	PF00117;	AAC75084;BAA15854;	EcoCyc:GLUTAMIDOTRANS-MONOMER;ECOL316407:JW2005-MONOMER;MetaCyc:GLUTAMIDOTRANS-MONOMER;
P60664	HisF	hisF b2025 JW2007	Imidazole glycerol phosphate synthase subunit HisF (EC 4.3.2.10) (IGP synthase cyclase subunit) (IGP synthase subunit HisF) (ImGP synthase subunit HisF) (IGPS subunit HisF)	5 out of 5	histidine biosynthetic process [GO:0000105]	ecj:JW2007;eco:b2025;	PF00977;	AAC75086;BAA15857;	EcoCyc:CYCLASE-MONOMER;ECOL316407:JW2007-MONOMER;MetaCyc:CYCLASE-MONOMER;
P06988	HisD	hisD b2020 JW2002	Histidinol dehydrogenase (HDH) (EC 1.1.1.23)	5 out of 5	histidine biosynthetic process [GO:0000105]	ecj:JW2002;eco:b2020;	PF00815;	AAC75081;BAA15851;	EcoCyc:HISTDEHYD-MONOMER;ECOL316407:JW2002-MONOMER;MetaCyc:HISTDEHYD-MONOMER;
P0A6C5	ArgA	argA b2818 JW2786	Amino-acid acetyltransferase (EC 2.3.1.1) (N-acetylglutamate synthase) (AGS) (NAGS)	4 out of 5	arginine biosynthetic process [GO:0006526]	ecj:JW2786;eco:b2818;	PF00696;PF00583;	AAC75857;BAE76887;	EcoCyc:N-ACETYLTRANSFER-MONOMER;ECOL316407:JW2786-MONOMER;MetaCyc:N-ACETYLTRANSFER-MONOMER;
P0A6C8	ArgB	argB b3959 JW5553	Acetylglutamate kinase (EC 2.7.2.8) (N-acetyl-L-glutamate 5-phosphotransferase) (NAG kinase) (NAGK)	5 out of 5	arginine biosynthetic process [GO:0006526]; arginine biosynthetic process via ornithine [GO:0042450]; cellular response to DNA damage stimulus [GO:0006974]	ecj:JW5553;eco:b3959;	PF00696;	AAC76941;BAE77352;	EcoCyc:ACETYLGLUTKIN-MONOMER;ECOL316407:JW5553-MONOMER;MetaCyc:ACETYLGLUTKIN-MONOMER;
P11446	ArgC	argC b3958 JW3930	N-acetyl-gamma-glutamyl-phosphate reductase (AGPR) (EC 1.2.1.38) (N-acetyl-glutamate semialdehyde dehydrogenase) (NAGSA dehydrogenase)	3 out of 5	arginine biosynthetic process [GO:0006526]	ecj:JW3930;eco:b3958;	PF01118;PF02774;	AAC76940;BAE77353;	EcoCyc:N-ACETYLGLUTPREDUCT-MONOMER;ECOL316407:JW3930-MONOMER;MetaCyc:N-ACETYLGLUTPREDUCT-MONOMER;
P11447	ArgH	argH b3960 JW3932	Argininosuccinate lyase (ASAL) (EC 4.3.2.1) (Arginosuccinase)	2 out of 5	arginine biosynthetic process via ornithine [GO:0042450]	ecj:JW3932;eco:b3960;	PF14698;PF00206;	AAC76942;BAE77351;	EcoCyc:ARGSUCCINLYA-MONOMER;ECOL316407:JW3932-MONOMER;MetaCyc:ARGSUCCINLYA-MONOMER;
P00895	TrpE	trpE b1264 JW1256	Anthranilate synthase component 1 (AS) (ASI) (EC 4.1.3.27)	4 out of 5	tryptophan biosynthetic process [GO:0000162]	ecj:JW1256;eco:b1264;	PF04715;PF00425;	AAC74346;BAA14799;	EcoCyc:ANTHRANSYNCOMPI-MONOMER;ECOL316407:JW1256-MONOMER;MetaCyc:ANTHRANSYNCOMPI-MONOMER;
P05041	PabB	pabB b1812 JW1801	Aminodeoxychorismate synthase component 1 (ADC synthase) (ADCS) (EC 2.6.1.85) (4-amino-4-deoxychorismate synthase component 1)	5 out of 5	folic acid biosynthetic process [GO:0046656]; tetrahydrofolate biosynthetic process [GO:0046654]	ecj:JW1801;eco:b1812;	PF04715;PF00425;	AAC74882;BAA15619;	EcoCyc:PABASYN-COMPI-MONOMER;ECOL316407:JW1801-MONOMER;MetaCyc:PABASYN-COMPI-MONOMER;
P00903	PabA	pabA b3360 JW3323	Aminodeoxychorismate synthase component 2 (ADC synthase) (ADCS) (EC 2.6.1.85) (4-amino-4-deoxychorismate synthase component 2) (Aminodeoxychorismate synthase, glutamine amidotransferase component)	5 out of 5	folic acid biosynthetic process [GO:0046656]; glutamine metabolic process [GO:0006541]; tetrahydrofolate biosynthetic process [GO:0046654]; tryptophan biosynthetic process [GO:0000162]	ecj:JW3323;eco:b3360;	PF00117;	AAC76385;BAE77930;	EcoCyc:PABASYN-COMPII-MONOMER;ECOL316407:JW3323-MONOMER;MetaCyc:PABASYN-COMPII-MONOMER;
P00904	TrpD	trpGD trpD b1263 JW1255	Bifunctional protein TrpGD [Includes: Anthranilate synthase component 2 (AS) (ASII) (EC 4.1.3.27) (Anthranilate synthase, glutamine amidotransferase component); Anthranilate phosphoribosyltransferase (EC 2.4.2.18)]	5 out of 5	glutamine metabolic process [GO:0006541]; phenazine biosynthetic process [GO:0002047]; tryptophan biosynthetic process [GO:0000162]	ecj:JW1255;eco:b1263;	PF00117;PF02885;PF00591;	AAC74345;BAA14798;	EcoCyc:ANTHRANSYNCOMPII-MONOMER;ECOL316407:JW1255-MONOMER;MetaCyc:ANTHRANSYNCOMPII-MONOMER;
P30177	YbiB	ybiB b0800 JW0785	Uncharacterized protein YbiB	2 out of 5	tryptophan biosynthetic process [GO:0000162]	ecj:JW0785;eco:b0800;	PF02885;	AAC73887;BAA35466;	EcoCyc:EG11580-MONOMER;ECOL316407:JW0785-MONOMER;
P00909	TrpF	trpC trpF b1262 JW1254	Tryptophan biosynthesis protein TrpCF [Includes: Indole-3-glycerol phosphate synthase (IGPS) (EC 4.1.1.48); N-(5'-phospho-ribosyl)anthranilate isomerase (PRAI) (EC 5.3.1.24)]	4 out of 5	tryptophan biosynthetic process [GO:0000162]	ecj:JW1254;eco:b1262;	PF00218;PF00697;	AAC74344;BAA14794;	EcoCyc:PRAI-IGPS;ECOL316407:JW1254-MONOMER;MetaCyc:PRAI-IGPS;
P0A877	TrpA	trpA b1260 JW1252	Tryptophan synthase alpha chain (EC 4.2.1.20)	4 out of 5	aromatic amino acid family biosynthetic process [GO:0009073]; tryptophan biosynthetic process [GO:0000162]	ecj:JW1252;eco:b1260;	PF00290;	AAC74342;BAA14792;	EcoCyc:TRYPSYN-APROTEIN;ECOL316407:JW1252-MONOMER;MetaCyc:TRYPSYN-APROTEIN;
P0A879	TrpB	trpB b1261 JW1253	Tryptophan synthase beta chain (EC 4.2.1.20)	5 out of 5	aromatic amino acid family biosynthetic process [GO:0009073]; tryptophan biosynthetic process [GO:0000162]	ecj:JW1253;eco:b1261;	PF00291;	AAC74343;BAA14793;	EcoCyc:TRYPSYN-BPROTEIN;ECOL316407:JW1253-MONOMER;MetaCyc:TRYPSYN-BPROTEIN;
P18335	ArgD	argD dapC dtu b3359 JW3322	Acetylornithine/succinyldiaminopimelate aminotransferase (ACOAT) (DapATase) (Succinyldiaminopimelate transferase) (EC 2.6.1.11) (EC 2.6.1.17)	5 out of 5	arginine biosynthetic process via ornithine [GO:0042450]; lysine biosynthetic process via diaminopimelate and N-succinyl-2-amino-6-ketopimelate [GO:0033359]	ecj:JW3322;eco:b3359;	PF00202;	AAC76384;BAE77931;	EcoCyc:ACETYLORNTRANSAM-MONOMER;ECOL316407:JW3322-MONOMER;MetaCyc:ACETYLORNTRANSAM-MONOMER;
P42588	PatA	patA ygjG b3073 JW5510	Putrescine aminotransferase (PAT) (PATase) (EC 2.6.1.82) (Cadaverine transaminase) (Diamine transaminase) (EC 2.6.1.29) (Putrescine transaminase) (Putrescine--2-oxoglutaric acid transaminase) (Putrescine:2-OG aminotransferase)	5 out of 5	L-lysine catabolic process [GO:0019477]; putrescine catabolic process [GO:0009447]	ecj:JW5510;eco:b3073;	PF00202;	AAC76108;BAE77123;	EcoCyc:G7596-MONOMER;ECOL316407:JW5510-MONOMER;MetaCyc:G7596-MONOMER;
P77581	ArGM	astC argM cstC ydjW b1748 JW1737	Succinylornithine transaminase (SOAT) (EC 2.6.1.81) (Carbon starvation protein C) (Succinylornithine aminotransferase)	5 out of 5	arginine biosynthetic process via ornithine [GO:0042450]; arginine catabolic process [GO:0006527]; arginine catabolic process to glutamate [GO:0019544]; arginine catabolic process to succinate [GO:0019545]; ornithine catabolic process [GO:0006593]	ecj:JW1737;eco:b1748;	PF00202;	AAC74818;BAA15539;	EcoCyc:SUCCORNTRANSAM-MONOMER;ECOL316407:JW1737-MONOMER;MetaCyc:SUCCORNTRANSAM-MONOMER;
O32583	ThiS	thiS thiG1 b4407 JW3955	Sulfur carrier protein ThiS (Thiamine biosynthesis protein ThiS)	4 out of 5	thiamine biosynthetic process [GO:0009228]; thiamine diphosphate biosynthetic process [GO:0009229]	ecj:JW3955;eco:b4407;	PF02597;	AAT48237;BAE77328;	EcoCyc:THIS-MONOMER;ECOL316407:JW3955-MONOMER;MetaCyc:THIS-MONOMER;
P30139	ThiG	thiG b3991 JW5549	Thiazole synthase (EC 2.8.1.10)	5 out of 5	thiamine biosynthetic process [GO:0009228]; thiamine diphosphate biosynthetic process [GO:0009229]	ecj:JW5549;eco:b3991;	PF05690;	AAC76965;BAE77329;	EcoCyc:THIG-MONOMER;ECOL316407:JW5549-MONOMER;MetaCyc:THIG-MONOMER;
P30137	ThiE	thiE b3993 JW3957	Thiamine-phosphate synthase (TP synthase) (TPS) (EC 2.5.1.3) (Thiamine-phosphate pyrophosphorylase) (TMP pyrophosphorylase) (TMP-PPase)	5 out of 5	thiamine biosynthetic process [GO:0009228]; thiamine diphosphate biosynthetic process [GO:0009229]	ecj:JW3957;eco:b3993;	PF02581;	AAC76967;BAE77326;	EcoCyc:THIE-MONOMER;ECOL316407:JW3957-MONOMER;MetaCyc:THIE-MONOMER;
P00547	ThrB	thrB b0003 JW0002	Homoserine kinase (HK) (HSK) (EC 2.7.1.39)	4 out of 5	threonine biosynthetic process [GO:0009088]	ecj:JW0002;eco:b0003;	PF08544;PF00288;	AAC73114;BAB96580;	EcoCyc:HOMOSERKIN-MONOMER;ECOL316407:JW0002-MONOMER;MetaCyc:HOMOSERKIN-MONOMER;
P00934	ThrC	thrC b0004 JW0003	Threonine synthase (TS) (EC 4.2.3.1)	4 out of 5	threonine biosynthetic process [GO:0009088]	ecj:JW0003;eco:b0004;	PF00291;PF14821;	AAC73115;BAB96581;	EcoCyc:THRESYN-MONOMER;ECOL316407:JW0003-MONOMER;MetaCyc:THRESYN-MONOMER;
P30125	LeuB	leuB b0073 JW5807	3-isopropylmalate dehydrogenase (EC 1.1.1.85) (3-IPM-DH) (Beta-IPM dehydrogenase) (IMDH)	5 out of 5	cellular response to amino acid starvation [GO:0034198]; leucine biosynthetic process [GO:0009098]	ecj:JW5807;eco:b0073;	PF00180;	AAC73184;BAB96642;	EcoCyc:3-ISOPROPYLMALDEHYDROG-MONOMER;ECOL316407:JW5807-MONOMER;MetaCyc:3-ISOPROPYLMALDEHYDROG-MONOMER;
P76251	DmlA	dmlA yeaU b1800 JW1789	D-malate dehydrogenase [decarboxylating] (EC 1.1.1.83) (D-malate degradation protein A) (D-malate oxidase)	5 out of 5	malate metabolic process [GO:0006108]	ecj:JW1789;eco:b1800;	PF00180;	AAC74870;BAA15595;	EcoCyc:G6986-MONOMER;ECOL316407:JW1789-MONOMER;MetaCyc:G6986-MONOMER;
P00968	CarB	carB pyrA b0033 JW0031	Carbamoyl-phosphate synthase large chain (EC 6.3.5.5) (Carbamoyl-phosphate synthetase ammonia chain)	5 out of 5	'de novo' UMP biosynthetic process [GO:0044205]; arginine biosynthetic process [GO:0006526]; cellular amino acid biosynthetic process [GO:0008652]; glutamine metabolic process [GO:0006541]; nitrogen compound metabolic process [GO:0006807]; pyrimidine nucleobase biosynthetic process [GO:0019856]	ecj:JW0031;eco:b0033;	PF02786;PF02787;PF02142;	AAC73144;BAB96602;	EcoCyc:CARBPSYN-LARGE;ECOL316407:JW0031-MONOMER;MetaCyc:CARBPSYN-LARGE;
P0A6F1	CarA	carA pyrA b0032 JW0030	Carbamoyl-phosphate synthase small chain (EC 6.3.5.5) (Carbamoyl-phosphate synthetase glutamine chain)	5 out of 5	'de novo' pyrimidine nucleobase biosynthetic process [GO:0006207]; 'de novo' UMP biosynthetic process [GO:0044205]; arginine biosynthetic process [GO:0006526]; glutamine metabolic process [GO:0006541]; nitrogen compound metabolic process [GO:0006807]	ecj:JW0030;eco:b0032;	PF00988;PF00117;	AAC73143;BAB96601;	EcoCyc:CARBPSYN-SMALL;ECOL316407:JW0030-MONOMER;MetaCyc:CARBPSYN-SMALL;
P09831	GltB	gltB aspB b3212 JW3179	Glutamate synthase [NADPH] large chain (EC 1.4.1.13) (Glutamate synthase subunit alpha) (GLTS alpha chain) (NADPH-GOGAT)	5 out of 5	ammonia assimilation cycle [GO:0019676]; glutamate biosynthetic process [GO:0006537]; L-glutamate biosynthetic process [GO:0097054]	ecj:JW3179;eco:b3212;	PF00310;PF04898;PF01645;PF01493;	AAC76244;BAE77256;	EcoCyc:GLUSYNLARGE-MONOMER;ECOL316407:JW3179-MONOMER;MetaCyc:GLUSYNLARGE-MONOMER;
P07004	ProA	proA b0243 JW0233	Gamma-glutamyl phosphate reductase (GPR) (EC 1.2.1.41) (Glutamate-5-semialdehyde dehydrogenase) (Glutamyl-gamma-semialdehyde dehydrogenase) (GSA dehydrogenase)	5 out of 5	L-proline biosynthetic process [GO:0055129]	ecj:JW0233;eco:b0243;	PF00171;	AAC73347;BAA77912;	EcoCyc:GLUTSEMIALDEHYDROG-MONOMER;ECOL316407:JW0233-MONOMER;MetaCyc:GLUTSEMIALDEHYDROG-MONOMER;
P0A7B5	ProB	proB b0242 JW0232	Glutamate 5-kinase (EC 2.7.2.11) (Gamma-glutamyl kinase) (GK)	5 out of 5	L-proline biosynthetic process [GO:0055129]; proline biosynthetic process [GO:0006561]	ecj:JW0232;eco:b0242;	PF00696;PF01472;	AAC73346;BAA77911;	EcoCyc:GLUTKIN-MONOMER;ECOL316407:JW0232-MONOMER;MetaCyc:GLUTKIN-MONOMER;
P0A9L8	ProC	proC b0386 JW0377	Pyrroline-5-carboxylate reductase (P5C reductase) (P5CR) (EC 1.5.1.2) (PCA reductase)	4 out of 5	L-proline biosynthetic process [GO:0055129]	ecj:JW0377;eco:b0386;	PF03807;PF14748;	AAC73489;BAE76167;	EcoCyc:PYRROLINECARBREDUCT-MONOMER;ECOL316407:JW0377-MONOMER;MetaCyc:PYRROLINECARBREDUCT-MONOMER;
P07623	MetA	metAS metA b4013 JW3973	Homoserine O-succinyltransferase (HST) (EC 2.3.1.46) (Homoserine transsuccinylase) (HTS)	5 out of 5	L-methionine biosynthetic process from homoserine via O-succinyl-L-homoserine and cystathionine [GO:0019281]	ecj:JW3973;eco:b4013;	PF04204;	AAC76983;BAE78015;	EcoCyc:HOMSUCTRAN-MONOMER;ECOL316407:JW3973-MONOMER;MetaCyc:HOMSUCTRAN-MONOMER;
P04036	DapB	dapB b0031 JW0029	4-hydroxy-tetrahydrodipicolinate reductase (HTPA reductase) (EC 1.17.1.8)	5 out of 5	cellular amino acid biosynthetic process [GO:0008652]; diaminopimelate biosynthetic process [GO:0019877]; lysine biosynthetic process via diaminopimelate [GO:0009089]	ecj:JW0029;eco:b0031;	PF05173;PF01113;	AAC73142;BAB96600;	EcoCyc:DIHYDROPICRED-MONOMER;ECOL316407:JW0029-MONOMER;MetaCyc:DIHYDROPICRED-MONOMER;
P26281	FolK	folK b0142 JW0138	2-amino-4-hydroxy-6-hydroxymethyldihydropteridine pyrophosphokinase (EC 2.7.6.3) (6-hydroxymethyl-7,8-dihydropterin pyrophosphokinase) (PPPK) (7,8-dihydro-6-hydroxymethylpterin-pyrophosphokinase) (HPPK)	4 out of 5	folic acid biosynthetic process [GO:0046656]; tetrahydrofolate biosynthetic process [GO:0046654]	ecj:JW0138;eco:b0142;	PF01288;	AAC73253;BAB96719;	EcoCyc:H2PTERIDINEPYROPHOSPHOKIN-MONOMER;ECOL316407:JW0138-MONOMER;MetaCyc:H2PTERIDINEPYROPHOSPHOKIN-MONOMER;
P07639	AroB	aroB b3389 JW3352	3-dehydroquinate synthase (DHQS) (EC 4.2.3.4)	5 out of 5	aromatic amino acid family biosynthetic process [GO:0009073]; chorismate biosynthetic process [GO:0009423]	ecj:JW3352;eco:b3389;	PF01761;	AAC76414;BAE77902;	EcoCyc:AROB-MONOMER;ECOL316407:JW3352-MONOMER;MetaCyc:AROB-MONOMER;
P12008	AroC	aroC b2329 JW2326	Chorismate synthase (CS) (EC 4.2.3.5) (5-enolpyruvylshikimate-3-phosphate phospholyase) (EPSP phospholyase)	5 out of 5	aromatic amino acid family biosynthetic process [GO:0009073]; chorismate biosynthetic process [GO:0009423]	ecj:JW2326;eco:b2329;	PF01264;	AAC75389;BAA16185;	EcoCyc:AROC-MONOMER;ECOL316407:JW2326-MONOMER;MetaCyc:AROC-MONOMER;
P62615	IspE	ispE ipk ychB b1208 JW1199	4-diphosphocytidyl-2-C-methyl-D-erythritol kinase (CMK) (EC 2.7.1.148) (4-(cytidine-5'-diphospho)-2-C-methyl-D-erythritol kinase)	4 out of 5	isopentenyl diphosphate biosynthetic process, methylerythritol 4-phosphate pathway [GO:0019288]; terpenoid biosynthetic process [GO:0016114]	ecj:JW1199;eco:b1208;	PF08544;PF00288;	AAC74292;BAA36066;	EcoCyc:EG11294-MONOMER;ECOL316407:JW1199-MONOMER;MetaCyc:EG11294-MONOMER;
P0ABQ0	CoaBC	coaBC dfp b3639 JW5642	Coenzyme A biosynthesis bifunctional protein CoaBC (DNA/pantothenate metabolism flavoprotein) (Phosphopantothenoylcysteine synthetase/decarboxylase) (PPCS-PPCDC) [Includes: Phosphopantothenoylcysteine decarboxylase (PPC decarboxylase) (PPC-DC) (EC 4.1.1.36) (CoaC); Phosphopantothenate--cysteine ligase (EC 6.3.2.5) (CoaB) (Phosphopantothenoylcysteine synthetase) (PPC synthetase) (PPC-S)]	5 out of 5	coenzyme A biosynthetic process [GO:0015937]; pantothenate catabolic process [GO:0015941]	ecj:JW5642;eco:b3639;	PF04127;PF02441;	AAC76663;BAE77653;	EcoCyc:EG10004-MONOMER;ECOL316407:JW5642-MONOMER;MetaCyc:EG10004-MONOMER;
P15640	PurD	purD b4005 JW3969	Phosphoribosylamine--glycine ligase (EC 6.3.4.13) (GARS) (Glycinamide ribonucleotide synthetase) (Phosphoribosylglycinamide synthetase)	4 out of 5	'de novo' IMP biosynthetic process [GO:0006189]; cellular response to DNA damage stimulus [GO:0006974]; purine nucleobase biosynthetic process [GO:0009113]; purine nucleotide biosynthetic process [GO:0006164]	ecj:JW3969;eco:b4005;	PF01071;PF02843;PF02844;	AAC76979;BAE77314;	EcoCyc:GLYCRIBONUCSYN-MONOMER;ECOL316407:JW3969-MONOMER;MetaCyc:GLYCRIBONUCSYN-MONOMER;
P08178	PurM	purM purG b2499 JW2484	Phosphoribosylformylglycinamidine cyclo-ligase (EC 6.3.3.1) (AIR synthase) (AIRS) (Phosphoribosyl-aminoimidazole synthetase)	4 out of 5	'de novo' IMP biosynthetic process [GO:0006189]; adenine biosynthetic process [GO:0046084]; purine nucleotide biosynthetic process [GO:0006164]	ecj:JW2484;eco:b2499;	PF00586;PF02769;	AAC75552;BAA16387;	EcoCyc:AIRS-MONOMER;ECOL316407:JW2484-MONOMER;MetaCyc:AIRS-MONOMER;
P0AG18	PurE	purE b0523 JW0512	N5-carboxyaminoimidazole ribonucleotide mutase (N5-CAIR mutase) (EC 5.4.99.18) (5-(carboxyamino)imidazole ribonucleotide mutase)	5 out of 5	'de novo' IMP biosynthetic process [GO:0006189]	ecj:JW0512;eco:b0523;	PF00731;	AAC73625;BAE76300;	EcoCyc:PURE-MONOMER;ECOL316407:JW0512-MONOMER;MetaCyc:PURE-MONOMER;
P0A7D7	PurC	purC b2476 JW2461	Phosphoribosylaminoimidazole-succinocarboxamide synthase (EC 6.3.2.6) (SAICAR synthetase)	3 out of 5	'de novo' IMP biosynthetic process [GO:0006189]; cobalamin biosynthetic process [GO:0009236]	ecj:JW2461;eco:b2476;	PF01259;	AAC75529;BAA16353;	EcoCyc:SAICARSYN-MONOMER;ECOL316407:JW2461-MONOMER;MetaCyc:SAICARSYN-MONOMER;
P15639	PurH	purH b4006 JW3970	Bifunctional purine biosynthesis protein PurH [Includes: Phosphoribosylaminoimidazolecarboxamide formyltransferase (EC 2.1.2.3) (AICAR transformylase); IMP cyclohydrolase (EC 3.5.4.10) (ATIC) (IMP synthase) (Inosinicase)]	3 out of 5	'de novo' IMP biosynthetic process [GO:0006189]	ecj:JW3970;eco:b4006;	PF01808;PF02142;	AAC76980;BAE77313;	EcoCyc:AICARTRANSIMPCYCLO-CPLX;ECOL316407:JW3970-MONOMER;MetaCyc:AICARTRANSIMPCYCLO-CPLX;
P0AG16	PurF	purF b2312 JW2309	Amidophosphoribosyltransferase (ATase) (EC 2.4.2.14) (Glutamine phosphoribosylpyrophosphate amidotransferase) (GPATase)	5 out of 5	'de novo' IMP biosynthetic process [GO:0006189]; glutamine metabolic process [GO:0006541]; nucleoside metabolic process [GO:0009116]; purine nucleobase biosynthetic process [GO:0009113]; purine nucleotide biosynthetic process [GO:0006164]	ecj:JW2309;eco:b2312;	PF00156;	AAC75372;BAA16158;	EcoCyc:PRPPAMIDOTRANS-MONOMER;ECOL316407:JW2309-MONOMER;MetaCyc:PRPPAMIDOTRANS-MONOMER;
P08244	PyrF	pyrF b1281 JW1273	Orotidine 5'-phosphate decarboxylase (EC 4.1.1.23) (OMP decarboxylase) (OMPDCase) (OMPdecase)	5 out of 5	'de novo' pyrimidine nucleobase biosynthetic process [GO:0006207]; 'de novo' UMP biosynthetic process [GO:0044205]; nucleobase-containing small molecule interconversion [GO:0015949]	ecj:JW1273;eco:b1281;	PF00215;	AAC74363;BAA14835;	EcoCyc:OROTPDECARB-MONOMER;ECOL316407:JW1273-MONOMER;MetaCyc:OROTPDECARB-MONOMER;
P0A7E3	PyrE	pyrE b3642 JW3617	Orotate phosphoribosyltransferase (OPRT) (OPRTase) (EC 2.4.2.10)	5 out of 5	'de novo' pyrimidine nucleobase biosynthetic process [GO:0006207]; 'de novo' UMP biosynthetic process [GO:0044205]; pyrimidine nucleotide biosynthetic process [GO:0006221]; pyrimidine ribonucleoside biosynthetic process [GO:0046132]	ecj:JW3617;eco:b3642;	PF00156;	AAC76666;BAE77650;	EcoCyc:OROPRIBTRANS-MONOMER;ECOL316407:JW3617-MONOMER;MetaCyc:OROPRIBTRANS-MONOMER;
P07023	TyrA	tyrA b2600 JW2581	T-protein [Includes: Chorismate mutase (CM) (EC 5.4.99.5); Prephenate dehydrogenase (PDH) (EC 1.3.1.12)]	4 out of 5	chorismate metabolic process [GO:0046417]; L-phenylalanine biosynthetic process [GO:0009094]; oxidation-reduction process [GO:0055114]; tyrosine biosynthetic process [GO:0006571]	ecj:JW2581;eco:b2600;	PF01817;PF02153;	AAC75649;BAA16485;	EcoCyc:CHORISMUTPREPHENDEHYDROG-MONOMER;ECOL316407:JW2581-MONOMER;MetaCyc:CHORISMUTPREPHENDEHYDROG-MONOMER;
P0A9J8	PheA	pheA b2599 JW2580	Bifunctional chorismate mutase/prephenate dehydratase (Chorismate mutase-prephenate dehydratase) (P-protein) [Includes: Chorismate mutase (CM) (EC 5.4.99.5); Prephenate dehydratase (PDT) (EC 4.2.1.51)]	5 out of 5	chorismate metabolic process [GO:0046417]; L-phenylalanine biosynthetic process [GO:0009094]; tyrosine biosynthetic process [GO:0006571]	ecj:JW2580;eco:b2599;	PF01817;PF00800;	AAC75648;BAA16484;	EcoCyc:CHORISMUTPREPHENDEHYDRAT-MONOMER;ECOL316407:JW2580-MONOMER;MetaCyc:CHORISMUTPREPHENDEHYDRAT-MONOMER;
P09151	LeuA	leuA b0074 JW0073	2-isopropylmalate synthase (EC 2.3.3.13) (Alpha-IPM synthase) (Alpha-isopropylmalate synthase)	4 out of 5	leucine biosynthetic process [GO:0009098]	ecj:JW0073;eco:b0074;	PF00682;PF08502;	AAC73185;BAB96643;	EcoCyc:2-ISOPROPYLMALATESYN-MONOMER;ECOL316407:JW0073-MONOMER;MetaCyc:2-ISOPROPYLMALATESYN-MONOMER;
P51020	MhpE	mhpE b0352 JW0343	4-hydroxy-2-oxovalerate aldolase (HOA) (EC 4.1.3.39) (4-hydroxy-2-keto-pentanoic acid aldolase) (4-hydroxy-2-oxopentanoate aldolase)	4 out of 5	3-phenylpropionate catabolic process [GO:0019380]	ecj:JW0343;eco:b0352;	PF07836;PF00682;	AAC73455;BAE76134;	EcoCyc:MHPELY-MONOMER;ECOL316407:JW0343-MONOMER;MetaCyc:MHPELY-MONOMER;
P0A9Z1	GlnB	glnB b2553 JW2537	Nitrogen regulatory protein P-II 1	5 out of 5	regulation of catalytic activity [GO:0050790]; regulation of fatty acid biosynthetic process [GO:0042304]; regulation of nitrogen utilization [GO:0006808]	ecj:JW2537;eco:b2553;	PF00543;	AAC75606;BAA16461;	EcoCyc:PROTEIN-PII;ECOL316407:JW2537-MONOMER;MetaCyc:PROTEIN-PII;
P0AC55	GlnK	glnK ybaI b0450 JW0440	Nitrogen regulatory protein P-II 2	4 out of 5	positive regulation of nitrogen utilization [GO:0045848]; regulation of nitrogen utilization [GO:0006808]	ecj:JW0440;eco:b0450;	PF00543;	AAC73553;BAE76230;	EcoCyc:PROTEIN-PII2;ECOL316407:JW0440-MONOMER;MetaCyc:PROTEIN-PII2;
P69681	AmtB	amtB ybaG b0451 JW0441	Ammonia channel (Ammonia transporter)	5 out of 5	ammonium transport [GO:0015696]; carbon dioxide transport [GO:0015670]; nitrogen utilization [GO:0019740]	ecj:JW0441;eco:b0451;	PF00909;	AAC73554;BAE76231;	EcoCyc:AMTB-MONOMER;ECOL316407:JW0441-MONOMER;MetaCyc:AMTB-MONOMER;
P04391	ArgI	argI b4254 JW4211	Ornithine carbamoyltransferase subunit I (OTCase-1) (EC 2.1.3.3)	5 out of 5	arginine biosynthetic process via ornithine [GO:0042450]; citrulline biosynthetic process [GO:0019240]	ecj:JW4211;eco:b4254;	PF00185;PF02729;	AAC77211;BAE78251;	EcoCyc:CHAINI-MONOMER;ECOL316407:JW4211-MONOMER;MetaCyc:CHAINI-MONOMER;
P06960	ArgF	argF b0273 JW0266	Ornithine carbamoyltransferase subunit F (OTCase-2) (EC 2.1.3.3)	4 out of 5	arginine biosynthetic process via ornithine [GO:0042450]; cellular response to DNA damage stimulus [GO:0006974]; citrulline biosynthetic process [GO:0019240]	ecj:JW0266;eco:b0273;	PF00185;PF02729;	AAC73376;BAE76057;	EcoCyc:CHAINF-MONOMER;ECOL316407:JW0266-MONOMER;MetaCyc:CHAINF-MONOMER;
Q46803	YgeW	ygeW b2870 JW5463	Putative carbamoyltransferase YgeW (EC 2.1.3.-) (UTCase)	3 out of 5	arginine biosynthetic process via ornithine [GO:0042450]; citrulline biosynthetic process [GO:0019240]	ecj:JW5463;eco:b2870;	PF00185;PF02729;	AAT48152;BAE76936;	EcoCyc:G7489-MONOMER;ECOL316407:JW5463-MONOMER;
P0A738	MoaC	moaC chlA3 b0783 JW0766	Cyclic pyranopterin monophosphate synthase (EC 4.6.1.17) (Molybdenum cofactor biosynthesis protein C)	5 out of 5	Mo-molybdopterin cofactor biosynthetic process [GO:0006777]; protein hexamerization [GO:0034214]	ecj:JW0766;eco:b0783;	PF01967;	AAC73870;BAA35441;	EcoCyc:EG11666-MONOMER;ECOL316407:JW0766-MONOMER;MetaCyc:EG11666-MONOMER;
P30749	MoaE	moaE chlA5 b0785 JW0768	Molybdopterin synthase catalytic subunit (EC 2.8.1.12) (MPT synthase subunit 2) (Molybdenum cofactor biosynthesis protein E) (Molybdopterin-converting factor large subunit) (Molybdopterin-converting factor subunit 2)	5 out of 5	Mo-molybdopterin cofactor biosynthetic process [GO:0006777]	ecj:JW0768;eco:b0785;	PF02391;	AAC73872;BAA35443;	EcoCyc:EG11598-MONOMER;ECOL316407:JW0768-MONOMER;MetaCyc:EG11598-MONOMER;
P00963	AsnA	asnA b3744 JW3722	Aspartate--ammonia ligase (EC 6.3.1.1) (Asparagine synthetase A)	5 out of 5	asparagine biosynthetic process [GO:0006529]; cellular response to DNA damage stimulus [GO:0006974]; L-asparagine biosynthetic process [GO:0070981]	ecj:JW3722;eco:b3744;	PF03590;	AAC76767;BAE77544;	EcoCyc:ASNSYNA-MONOMER;ECOL316407:JW3722-MONOMER;MetaCyc:ASNSYNA-MONOMER;
P0A853	TnaA	tnaA ind b3708 JW3686	Tryptophanase (EC 4.1.99.1) (L-tryptophan indole-lyase) (TNase)	5 out of 5	protein homotetramerization [GO:0051289]; tryptophan catabolic process [GO:0006569]	ecj:JW3686;eco:b3708;	PF01212;	AAC76731;BAE77584;	EcoCyc:TRYPTOPHAN-MONOMER;ECOL316407:JW3686-MONOMER;MetaCyc:TRYPTOPHAN-MONOMER;
P42626	YhaM	yhaM yhaN b4470 JW5518	UPF0597 protein YhaM	3 out of 5	cysteine catabolic process [GO:0009093]; L-cysteine catabolic process to pyruvate [GO:0019450]; response to L-cysteine [GO:1901367]	ecj:JW5518;eco:b4470;	PF03313;	AAT48167;BAE77158;	EcoCyc:G7622-MONOMER;ECOL316407:JW5518-MONOMER;MetaCyc:G7622-MONOMER;
P0A7Z0	RpiA	rpiA ygfC b2914 JW5475	Ribose-5-phosphate isomerase A (EC 5.3.1.6) (Phosphoriboisomerase A) (PRI)	5 out of 5	D-ribose metabolic process [GO:0006014]; pentose-phosphate shunt, non-oxidative branch [GO:0009052]	ecj:JW5475;eco:b2914;	PF06026;	AAC75951;BAE76978;	EcoCyc:RIB5PISOMA-MONOMER;ECOL316407:JW5475-MONOMER;MetaCyc:RIB5PISOMA-MONOMER;
P28248	PaxA	dcd dus paxA b2065 JW2050	dCTP deaminase (EC 3.5.4.13) (Deoxycytidine triphosphate deaminase)	5 out of 5	dUMP biosynthetic process [GO:0006226]; dUTP biosynthetic process [GO:0006229]; nucleobase-containing small molecule interconversion [GO:0015949]; response to radiation [GO:0009314]	ecj:JW2050;eco:b2065;	PF00692;	AAC75126;BAA15918;	EcoCyc:DCTP-DEAM-MONOMER;ECOL316407:JW2050-MONOMER;MetaCyc:DCTP-DEAM-MONOMER;
P0AEZ1	MetF	metF b3941 JW3913	5,10-methylenetetrahydrofolate reductase (EC 1.5.1.20)	5 out of 5	methionine biosynthetic process [GO:0009086]; one-carbon metabolic process [GO:0006730]; protein homotetramerization [GO:0051289]; tetrahydrofolate biosynthetic process [GO:0046654]; tetrahydrofolate interconversion [GO:0035999]	ecj:JW3913;eco:b3941;	PF02219;	AAC76923;BAE77369;	EcoCyc:METHYLENETHFREDUCT-MONOMER;ECOL316407:JW3913-MONOMER;MetaCyc:METHYLENETHFREDUCT-MONOMER;
P07650	DeoA	deoA tpp ttg b4382 JW4345	Thymidine phosphorylase (EC 2.4.2.4) (TdRPase)	4 out of 5	cellular response to DNA damage stimulus [GO:0006974]; pyrimidine nucleobase metabolic process [GO:0006206]; pyrimidine nucleoside metabolic process [GO:0006213]; thymidine metabolic process [GO:0046104]	ecj:JW4345;eco:b4382;	PF02885;PF00591;PF07831;	AAC77335;BAE78371;	EcoCyc:DEOA-MONOMER;ECOL316407:JW4345-MONOMER;MetaCyc:DEOA-MONOMER;
P0ABF6	Cdd	cdd b2143 JW2131	Cytidine deaminase (EC 3.5.4.5) (Cytidine aminohydrolase) (CDA)	5 out of 5	cytidine deamination [GO:0009972]; deoxycytidine catabolic process [GO:0006217]; nucleobase-containing small molecule interconversion [GO:0015949]	ecj:JW2131;eco:b2143;	PF00383;PF08211;	AAC75204;BAE76620;	EcoCyc:CYTIDEAM-MONOMER;ECOL316407:JW2131-MONOMER;MetaCyc:CYTIDEAM-MONOMER;
P45578	LuxS	luxS ygaG b2687 JW2662	S-ribosylhomocysteine lyase (EC 4.4.1.21) (AI-2 synthesis protein) (Autoinducer-2 production protein LuxS)	4 out of 5	L-methionine salvage from S-adenosylmethionine [GO:0019284]; quorum sensing [GO:0009372]	ecj:JW2662;eco:b2687;	PF02664;	AAC75734;BAA16549;	EcoCyc:EG12712-MONOMER;ECOL316407:JW2662-MONOMER;MetaCyc:EG12712-MONOMER;
P39391	YjiT	yjiT b4342 JW5787	Protein YjiT	1 out of 5		ecj:JW5787;		BAE78334;	EcoCyc:G7938-MONOMER;ECOL316407:JW5787-MONOMER;
P77658	YnaA	ynaA tmpR b1368 JW1361	Protein YnaA	1 out of 5		ecj:JW1361;	PF06791;	BAA14961;	EcoCyc:G6691-MONOMER;ECOL316407:JW1361-MONOMER;
P0ABH7	GltA	gltA gluT icdB b0720 JW0710	Citrate synthase (EC 2.3.3.16)	5 out of 5	tricarboxylic acid cycle [GO:0006099]	ecj:JW0710;eco:b0720;	PF00285;	AAC73814;BAA35384;	EcoCyc:CITSYN-MONOMER;ECOL316407:JW0710-MONOMER;MetaCyc:CITSYN-MONOMER;
P31660	PrpC	prpC yahS yzzD b0333 JW0324	2-methylcitrate synthase (2-MCS) (MCS) (EC 2.3.3.5) ((2S,3S)-2-methylcitrate synthase) (Citrate synthase) (EC 2.3.3.16)	5 out of 5	carbohydrate metabolic process [GO:0005975]; propionate metabolic process, methylcitrate cycle [GO:0019679]; tricarboxylic acid cycle [GO:0006099]	ecj:JW0324;eco:b0333;	PF00285;	AAC73436;BAE76115;	EcoCyc:G6198-MONOMER;ECOL316407:JW0324-MONOMER;MetaCyc:G6198-MONOMER;
P0ABK5	CysK	cysK cysZ b2414 JW2407	Cysteine synthase A (CSase A) (EC 2.5.1.47) (O-acetylserine (thiol)-lyase A) (OAS-TL A) (O-acetylserine sulfhydrylase A) (S-carboxymethylcysteine synthase) (EC 4.5.1.5) (Sulfate starvation-induced protein 5) (SSI5)	5 out of 5	cellular amino acid biosynthetic process [GO:0008652]; cysteine biosynthetic process from serine [GO:0006535]	ecj:JW2407;eco:b2414;	PF00291;	AAC75467;BAA16288;	EcoCyc:ACSERLYA-MONOMER;ECOL316407:JW2407-MONOMER;MetaCyc:ACSERLYA-MONOMER;
P16703	CysM	cysM b2421 JW2414	Cysteine synthase B (CSase B) (EC 2.5.1.47) (O-acetylserine (thiol)-lyase B) (OAS-TL B) (O-acetylserine sulfhydrylase B)	5 out of 5	cysteine biosynthetic process from serine [GO:0006535]	ecj:JW2414;eco:b2421;	PF00291;	AAC75474;BAA16295;	EcoCyc:ACSERLYB-MONOMER;ECOL316407:JW2414-MONOMER;MetaCyc:ACSERLYB-MONOMER;
P0A6D5	YdiB	ydiB	Quinate/shikimate dehydrogenase (EC 1.1.1.282) (NAD-dependent shikimate 5-dehydrogenase)	5 out of 5	aromatic amino acid family biosynthetic process [GO:0009073]; chorismate biosynthetic process [GO:0009423]; shikimate metabolic process [GO:0019632]	ecj:JW1682;eco:b1692;	PF18317;PF08501;	AAC74762;BAA15449;	EcoCyc:EG11234-MONOMER;ECOL316407:JW1682-MONOMER;MetaCyc:EG11234-MONOMER;
P15770	AroE	aroE b3281 JW3242	Shikimate dehydrogenase (NADP(+)) (SD) (SDH) (EC 1.1.1.25)	5 out of 5	aromatic amino acid family biosynthetic process [GO:0009073]; chorismate biosynthetic process [GO:0009423]; shikimate biosynthetic process [GO:0033587]; shikimate metabolic process [GO:0019632]	ecj:JW3242;eco:b3281;	PF18317;PF01488;PF08501;	AAC76306;BAE78010;	EcoCyc:AROE-MONOMER;ECOL316407:JW3242-MONOMER;MetaCyc:AROE-MONOMER;
P0AD61	PykF	pykF b1676 JW1666	Pyruvate kinase I (EC 2.7.1.40) (PK-1)	5 out of 5	glycolytic process [GO:0006096]; protein homotetramerization [GO:0051289]; response to heat [GO:0009408]	ecj:JW1666;eco:b1676;	PF00224;PF02887;	AAC74746;BAA15445;	EcoCyc:PKI-MONOMER;ECOL316407:JW1666-MONOMER;MetaCyc:PKI-MONOMER;
P21599	PykA	pykA b1854 JW1843	Pyruvate kinase II (EC 2.7.1.40) (PK-2)	5 out of 5	glycolytic process [GO:0006096]; protein homotetramerization [GO:0051289]	ecj:JW1843;eco:b1854;	PF00224;PF02887;	AAC74924;BAA15662;	EcoCyc:PKII-MONOMER;ECOL316407:JW1843-MONOMER;MetaCyc:PKII-MONOMER;
P0A9S5	GldA	gldA b3945 JW5556	Glycerol dehydrogenase (GDH) (GLDH) (EC 1.1.1.6)	5 out of 5	anaerobic glycerol catabolic process [GO:0019588]; methylglyoxal catabolic process [GO:0051596]	ecj:JW5556;eco:b3945;	PF00465;	AAC76927;BAE77365;	EcoCyc:GLYCDEH-MONOMER;ECOL316407:JW5556-MONOMER;MetaCyc:GLYCDEH-MONOMER;
P45579	HcxA	hcxA ybdH b0599 JW0592	Hydroxycarboxylate dehydrogenase A (EC 1.1.1.-) (2-oxobutanoate reductase) (2-oxoglutarate reductase)	4 out of 5		ecj:JW0592;eco:b0599;	PF00465;	AAC73700;BAA35229;	EcoCyc:EG12692-MONOMER;ECOL316407:JW0592-MONOMER;
P07395	PheT	pheT b1713 JW1703	Phenylalanine--tRNA ligase beta subunit (EC 6.1.1.20) (Phenylalanyl-tRNA synthetase beta subunit) (PheRS)	5 out of 5	phenylalanyl-tRNA aminoacylation [GO:0006432]	ecj:JW1703;eco:b1713;	PF03483;PF03484;PF03147;PF01588;PF17759;	AAC74783;BAA15481;	EcoCyc:PHET-MONOMER;ECOL316407:JW1703-MONOMER;MetaCyc:PHET-MONOMER;
P0A8F8	UvrB	uvrB b0779 JW0762	UvrABC system protein B (Protein UvrB) (Excinuclease ABC subunit B)	5 out of 5	nucleotide-excision repair [GO:0006289]; response to radiation [GO:0009314]; SOS response [GO:0009432]	ecj:JW0762;eco:b0779;	PF00271;PF04851;PF02151;PF12344;PF17757;	AAC73866;BAA35437;	EcoCyc:EG11062-MONOMER;ECOL316407:JW0762-MONOMER;MetaCyc:EG11062-MONOMER;
P60785	LepA	lepA b2569 JW2553	Elongation factor 4 (EF-4) (EC 3.6.5.n1) (Ribosomal back-translocase LepA)	5 out of 5	positive regulation of translation [GO:0045727]; response to cold [GO:0009409]; response to pH [GO:0009268]; response to salt stress [GO:0009651]; ribosomal small subunit biogenesis [GO:0042274]	ecj:JW2553;eco:b2569;	PF00679;PF00009;PF03144;PF06421;	AAC75622;BAE76745;	EcoCyc:EG10529-MONOMER;ECOL316407:JW2553-MONOMER;MetaCyc:EG10529-MONOMER;
P08312	PheS	pheS b1714 JW5277	Phenylalanine--tRNA ligase alpha subunit (EC 6.1.1.20) (Phenylalanyl-tRNA synthetase alpha subunit) (PheRS)	5 out of 5	phenylalanyl-tRNA aminoacylation [GO:0006432]	ecj:JW5277;eco:b1714;	PF02912;PF01409;	AAC74784;BAA15482;	EcoCyc:PHES-MONOMER;ECOL316407:JW5277-MONOMER;MetaCyc:PHES-MONOMER;
P42641	ObgE	obgE cgtA obg yhbZ b3183 JW3150	GTPase ObgE/CgtA (EC 3.6.5.-) (GTP-binding protein Obg)	5 out of 5	chromosome segregation [GO:0007059]; dormancy process [GO:0022611]; negative regulation of ribosome biogenesis [GO:0090071]; ribosome assembly [GO:0042255]	ecj:JW3150;eco:b3183;	PF01018;PF01926;	AAC76215;BAE77227;	EcoCyc:G7656-MONOMER;ECOL316407:JW3150-MONOMER;
P0A7V0	RpsB	rpsB b0169 JW0164	30S ribosomal protein S2 (Small ribosomal subunit protein uS2)	5 out of 5	ribosomal small subunit assembly [GO:0000028]; translation [GO:0006412]	ecj:JW0164;eco:b0169;	PF00318;	AAC73280;BAB96744;	EcoCyc:EG10901-MONOMER;ECOL316407:JW0164-MONOMER;MetaCyc:EG10901-MONOMER;
P0AGJ9	TyrS	tyrS b1637 JW1629	Tyrosine--tRNA ligase (EC 6.1.1.1) (Tyrosyl-tRNA synthetase) (TyrRS)	5 out of 5	tRNA aminoacylation [GO:0043039]; tyrosyl-tRNA aminoacylation [GO:0006437]	ecj:JW1629;eco:b1637;	PF01479;PF00579;	AAC74709;BAA15398;	EcoCyc:TYRS-MONOMER;ECOL316407:JW1629-MONOMER;MetaCyc:TYRS-MONOMER;
P0A8M3	ThrS	thrS b1719 JW1709	Threonine--tRNA ligase (EC 6.1.1.3) (Threonyl-tRNA synthetase) (ThrRS)	5 out of 5	negative regulation of translational initiation [GO:0045947]; regulation of translation [GO:0006417]; response to antibiotic [GO:0046677]; threonyl-tRNA aminoacylation [GO:0006435]; tRNA aminoacylation [GO:0043039]; tRNA aminoacylation for protein translation [GO:0006418]	ecj:JW1709;eco:b1719;	PF03129;PF02824;PF00587;PF07973;	AAC74789;BAA15498;	EcoCyc:THRS-MONOMER;ECOL316407:JW1709-MONOMER;MetaCyc:THRS-MONOMER;
P0A799	Pgk	pgk b2926 JW2893	Phosphoglycerate kinase (EC 2.7.2.3)	5 out of 5	gluconeogenesis [GO:0006094]; glycolytic process [GO:0006096]; positive regulation of oxidative phosphorylation [GO:1903862]	ecj:JW2893;eco:b2926;	PF00162;	AAC75963;BAE76990;	EcoCyc:PGK;ECOL316407:JW2893-MONOMER;MetaCyc:PGK;
P11875	ArgS	argS b1876 JW1865	Arginine--tRNA ligase (EC 6.1.1.19) (Arginyl-tRNA synthetase) (ArgRS)	3 out of 5	arginyl-tRNA aminoacylation [GO:0006420]	ecj:JW1865;eco:b1876;	PF03485;PF05746;PF00750;	AAC74946;BAA15686;	EcoCyc:ARGS-MONOMER;ECOL316407:JW1865-MONOMER;MetaCyc:ARGS-MONOMER;
P0AGA2	SecY	secY prlA b3300 JW3262	Protein translocase subunit SecY	5 out of 5	intracellular protein transmembrane transport [GO:0065002]; intracellular protein transport [GO:0006886]; protein insertion into membrane from inner side [GO:0032978]; protein transport by the Sec complex [GO:0043952]; SRP-dependent cotranslational protein targeting to membrane, translocation [GO:0006616]	ecj:JW3262;eco:b3300;	PF00344;	AAC76325;BAE77991;	EcoCyc:SECY;ECOL316407:JW3262-MONOMER;
P0AES6	GyrB	gyrB acrB cou himB hisU nalC parA pcbA b3699 JW5625	DNA gyrase subunit B (EC 5.6.2.2) (Type IIA topoisomerase subunit GyrB)	5 out of 5	DNA-dependent DNA replication [GO:0006261]; DNA topological change [GO:0006265]; response to antibiotic [GO:0046677]; response to drug [GO:0042493]; transcription, DNA-templated [GO:0006351]	ecj:JW5625;eco:b3699;	PF00204;PF00986;PF18053;PF02518;PF01751;	AAT48201;BAE77595;	EcoCyc:EG10424-MONOMER;ECOL316407:JW5625-MONOMER;MetaCyc:EG10424-MONOMER;
P20083	ParE	parE nfxD b3030 JW2998	DNA topoisomerase 4 subunit B (EC 5.6.2.2) (Topoisomerase IV subunit B)	5 out of 5	chromosome organization [GO:0051276]; DNA topological change [GO:0006265]; plasmid partitioning [GO:0030541]; response to antibiotic [GO:0046677]; sister chromatid cohesion [GO:0007062]	ecj:JW2998;eco:b3030;	PF00204;PF00986;PF02518;PF01751;	AAC76066;BAE77086;	EcoCyc:EG10687-MONOMER;ECOL316407:JW2998-MONOMER;
P0A809	RuvA	ruvA b1861 JW1850	Holliday junction ATP-dependent DNA helicase RuvA (EC 3.6.4.12)	5 out of 5	protein homotetramerization [GO:0051289]; recombinational repair [GO:0000725]; response to radiation [GO:0009314]; SOS response [GO:0009432]	ecj:JW1850;eco:b1861;	PF07499;PF01330;	AAC74931;BAA15672;	EcoCyc:EG10923-MONOMER;ECOL316407:JW1850-MONOMER;MetaCyc:EG10923-MONOMER;
P0A812	RuvB	ruvB b1860 JW1849	Holliday junction ATP-dependent DNA helicase RuvB (EC 3.6.4.12)	5 out of 5	recombinational repair [GO:0000725]; response to UV [GO:0009411]; SOS response [GO:0009432]	ecj:JW1849;eco:b1860;	PF17864;PF05491;PF05496;	AAC74930;BAA15671;	EcoCyc:EG10924-MONOMER;ECOL316407:JW1849-MONOMER;MetaCyc:EG10924-MONOMER;
P60340	TruB	truB yhbA b3166 JW3135	tRNA pseudouridine synthase B (EC 5.4.99.25) (Protein P35) (tRNA pseudouridine(55) synthase) (Psi55 synthase) (tRNA pseudouridylate synthase) (tRNA-uridine isomerase)	5 out of 5	mRNA pseudouridine synthesis [GO:1990481]; tRNA folding [GO:0061818]; tRNA modification [GO:0006400]; tRNA pseudouridine synthesis [GO:0031119]	ecj:JW3135;eco:b3166;	PF09157;PF16198;PF01509;	AAC76200;BAE77212;	EcoCyc:EG11177-MONOMER;ECOL316407:JW3135-MONOMER;MetaCyc:EG11177-MONOMER;
P76256	YeaZ	tsaB yeaZ b1807 JW1796	tRNA threonylcarbamoyladenosine biosynthesis protein TsaB (t(6)A37 threonylcarbamoyladenosine biosynthesis protein TsaB)	4 out of 5	tRNA threonylcarbamoyladenosine modification [GO:0002949]	ecj:JW1796;eco:b1807;	PF00814;	AAC74877;BAA15611;	EcoCyc:G6991-MONOMER;ECOL316407:JW1796-MONOMER;MetaCyc:G6991-MONOMER;
P0A873	TrmD	trmD b2607 JW2588	tRNA (guanine-N(1)-)-methyltransferase (EC 2.1.1.228) (M1G-methyltransferase) (tRNA [GM37] methyltransferase)	5 out of 5	tRNA methylation [GO:0030488]; tRNA N1-guanine methylation [GO:0002939]	ecj:JW2588;eco:b2607;	PF01746;	AAC75656;BAA16492;	EcoCyc:EG11023-MONOMER;ECOL316407:JW2588-MONOMER;MetaCyc:EG11023-MONOMER;
P28630	HolA	holA b0640 JW0635	DNA polymerase III subunit delta (EC 2.7.7.7)	5 out of 5	DNA-dependent DNA replication [GO:0006261]	ecj:JW0635;eco:b0640;	PF14840;PF06144;	AAC73741;BAA35287;	EcoCyc:EG11412-MONOMER;ECOL316407:JW0635-MONOMER;MetaCyc:EG11412-MONOMER;
P0AGD7	Ffh	ffh b2610 JW5414	Signal recognition particle protein (Fifty-four homolog) (Ffh) (p48)	5 out of 5	protein targeting to membrane [GO:0006612]; SRP-dependent cotranslational protein targeting to membrane [GO:0006614]	ecj:JW5414;eco:b2610;	PF00448;PF02881;PF02978;	AAC75659;BAA16495;	EcoCyc:EG10300-MONOMER;ECOL316407:JW5414-MONOMER;
P0ABU2	YchF	ychF engD gtp1 b1203 JW1194	Ribosome-binding ATPase YchF	5 out of 5	response to oxidative stress [GO:0006979]	ecj:JW1194;eco:b1203;	PF01926;PF06071;	AAC74287;BAA36061;	EcoCyc:EG11404-MONOMER;ECOL316407:JW1194-MONOMER;MetaCyc:EG11404-MONOMER;
P10442	RnhB	rnhB b0183 JW0178	Ribonuclease HII (RNase HII) (EC 3.1.26.4)	3 out of 5	DNA replication, removal of RNA primer [GO:0043137]; mismatch repair [GO:0006298]	ecj:JW0178;eco:b0183;	PF01351;	AAC73294;BAA77858;	EcoCyc:EG10861-MONOMER;ECOL316407:JW0178-MONOMER;MetaCyc:EG10861-MONOMER;
P37443	ycaI	ycaI b0913 JW5120	Uncharacterized protein YcaI	2 out of 5	establishment of competence for transformation [GO:0030420]	ecj:JW5120;eco:b0913;	PF03772;PF00753;	AAC73999;BAA35657;	EcoCyc:EG12375-MONOMER;ECOL316407:JW5120-MONOMER;
P0A6P7	EngB	engB yihA b3865 JW5930	Probable GTP-binding protein EngB	3 out of 5	division septum assembly [GO:0000917]	ecj:JW5930;eco:b3865;	PF01926;	AAC76862;BAE77444;	EcoCyc:EG11203-MONOMER;ECOL316407:JW5930-MONOMER;
P0A7L3	RplT	rplT pdzA b1716 JW1706	50S ribosomal protein L20 (Large ribosomal subunit protein bL20)	5 out of 5	ribosomal large subunit assembly [GO:0000027]; translation [GO:0006412]	ecj:JW1706;eco:b1716;	PF00453;	AAC74786;BAA15483;	EcoCyc:EG10881-MONOMER;ECOL316407:JW1706-MONOMER;MetaCyc:EG10881-MONOMER;
P0A7Y8	RnpA	rnpA b3704 JW3681	Ribonuclease P protein component (RNase P protein) (RNaseP protein) (EC 3.1.26.5) (Protein C5)	4 out of 5	RNA processing [GO:0006396]; tRNA 3'-trailer cleavage, endonucleolytic [GO:0034414]; tRNA 5'-leader removal [GO:0001682]	ecj:JW3681;eco:b3704;	PF00825;	AAC76727;BAE77590;	EcoCyc:EG10862-MONOMER;ECOL316407:JW3681-MONOMER;MetaCyc:EG10862-MONOMER;
P0A959	AlaA	alaA yfbQ b2290 JW2287	Glutamate-pyruvate aminotransferase AlaA (EC 2.6.1.2)	5 out of 5	alanine biosynthetic process [GO:0006523]; cellular response to DNA damage stimulus [GO:0006974]; D-alanine biosynthetic process [GO:0030632]; L-alanine biosynthetic process from pyruvate [GO:0019272]; response to antibiotic [GO:0046677]	ecj:JW2287;eco:b2290;	PF00155;	AAC75350;BAA16127;	EcoCyc:G7184-MONOMER;ECOL316407:JW2287-MONOMER;MetaCyc:G7184-MONOMER;
P77434	AlaC	alaC yfdZ b2379 JW2376	Glutamate-pyruvate aminotransferase AlaC (EC 2.6.1.2)	4 out of 5	alanine biosynthetic process [GO:0006523]; D-alanine biosynthetic process [GO:0030632]; L-alanine biosynthetic process from pyruvate [GO:0019272]	ecj:JW2376;eco:b2379;	PF00155;	AAC75438;BAA16249;	EcoCyc:G7242-MONOMER;ECOL316407:JW2376-MONOMER;MetaCyc:G7242-MONOMER;
P77806	YbdL	ybdL b0600 JW0593	Methionine aminotransferase (EC 2.6.1.88) (Methionine-oxo-acid transaminase)	5 out of 5	biosynthetic process [GO:0009058]	ecj:JW0593;eco:b0600;	PF00155;	AAC73701;BAA35230;	EcoCyc:G6329-MONOMER;ECOL316407:JW0593-MONOMER;MetaCyc:G6329-MONOMER;
P0A867	TalA	talA b2464 JW2448	Transaldolase A (EC 2.2.1.2)	3 out of 5	carbohydrate metabolic process [GO:0005975]; pentose-phosphate shunt [GO:0006098]	ecj:JW2448;eco:b2464;	PF00923;	AAC75517;BAA16339;	EcoCyc:TRANSALDOLA-MONOMER;ECOL316407:JW2448-MONOMER;
P32669	TalC	fsaB talC yijG b3946 JW3918	Fructose-6-phosphate aldolase 2 (EC 4.1.2.-) (Fructose-6-phosphate aldolase B) (FSAB)	4 out of 5	fructose metabolic process [GO:0006000]	ecj:JW3918;eco:b3946;	PF00923;	AAC76928;BAE77364;	EcoCyc:EG11905-MONOMER;ECOL316407:JW3918-MONOMER;MetaCyc:EG11905-MONOMER;
P78055	FsaA	fsaA fsa mipB ybiZ b0825 JW5109	Fructose-6-phosphate aldolase 1 (EC 4.1.2.-) (Fructose-6-phosphate aldolase A) (FSAA)	5 out of 5	fructose metabolic process [GO:0006000]	ecj:JW5109;eco:b0825;	PF00923;	AAC73912;BAA35513;	EcoCyc:G6428-MONOMER;ECOL316407:JW5109-MONOMER;MetaCyc:G6428-MONOMER;
P0A870	TalB	talB yaaK b0008 JW0007	Transaldolase B (EC 2.2.1.2)	5 out of 5	carbohydrate metabolic process [GO:0005975]; pentose-phosphate shunt, non-oxidative branch [GO:0009052]	ecj:JW0007;eco:b0008;	PF00923;	AAC73119;BAB96586;	EcoCyc:TRANSALDOLB-MONOMER;ECOL316407:JW0007-MONOMER;MetaCyc:TRANSALDOLB-MONOMER;
P31467	YieH	yieH b3715 JW3693	6-phosphogluconate phosphatase (EC 3.1.3.-)	4 out of 5		ecj:JW3693;eco:b3715;	PF13419;	AAC76738;BAE77573;	EcoCyc:EG11725-MONOMER;ECOL316407:JW3693-MONOMER;MetaCyc:EG11725-MONOMER;
P77475	YqaB	yqaB b2690 JW2665	Fructose-1-phosphate phosphatase YqaB (EC 3.1.3.-) (Fructose-1-phosphatase)	4 out of 5	dephosphorylation [GO:0016311]	ecj:JW2665;eco:b2690;	PF13419;	AAC75737;BAA16557;	EcoCyc:G7408-MONOMER;ECOL316407:JW2665-MONOMER;MetaCyc:G7408-MONOMER;
P77625	HxpA	hxpA yfbT b2293 JW5376	Hexitol phosphatase A (Mannitol-1-phosphatase) (EC 3.1.3.22) (Sorbitol-6-phosphatase) (EC 3.1.3.50) (Sugar-phosphatase) (EC 3.1.3.23)	5 out of 5	carbohydrate metabolic process [GO:0005975]; dephosphorylation [GO:0016311]	ecj:JW5376;eco:b2293;	PF13419;	AAC75353;BAA16129;	EcoCyc:G7187-MONOMER;ECOL316407:JW5376-MONOMER;MetaCyc:G7187-MONOMER;
P77247	HxpB	hxpB yniC b1727 JW1716	Hexitol phosphatase B (2-deoxyglucose-6-phosphate phosphatase) (EC 3.1.3.68) (Mannitol-1-phosphatase) (EC 3.1.3.22) (Sorbitol-6-phosphatase) (EC 3.1.3.50) (Sugar-phosphatase) (EC 3.1.3.23)	5 out of 5	carbohydrate metabolic process [GO:0005975]	ecj:JW1716;eco:b1727;	PF13419;	AAC74797;BAA15508;	EcoCyc:G6932-MONOMER;ECOL316407:JW1716-MONOMER;MetaCyc:G6932-MONOMER;
P77366	PgmB	ycjU pgmB b1317 JW1310	Beta-phosphoglucomutase (Beta-PGM) (EC 5.4.2.6)	5 out of 5	carbohydrate metabolic process [GO:0005975]; cellular response to DNA damage stimulus [GO:0006974]; DNA mediated transformation [GO:0009294]; response to antibiotic [GO:0046677]	ecj:JW1310;eco:b1317;	PF13419;	AAC74399;BAA14892;	EcoCyc:G6655-MONOMER;ECOL316407:JW1310-MONOMER;MetaCyc:G6655-MONOMER;

## Sheet: Module_Designation
Spectral Depth 50			Spectral Depth 150			Spectral Depth 300			Spectral Depth 1000
Module: Amino Acid Biosynthesis			Module: Nitrogen regulatory protein Pii			Module: Nitrogen regulatory protein Pii			Module: Nitrogen regulatory protein Pii
P00561	ThrA		P0A9Z1	GlnB		P0A9Z1	GlnB		P0A9Z1	GlnB
P00562	MetL		P0AC55	GlnK		P0AC55	GlnK		P0AC55	GlnK
P08660	LysC		P69681	AmtB
P00894	IlvH					Module: Phosphatase activity			Module: Phosphatase activity
P0ADF8	IlvN		Module: Phosphatase activity			P31467	YieH		P31467	YieH
P0A6A6	LeuC		P31467	YieH		P77475	YqaB		P77475	YqaB
P30126	LeuD		P77475	YqaB		P77625	HxpA		P77625	HxpA
P05793	IlvC		P77625	HxpA		P77247	HxpB		P77247	HxpB
P0A6E4	ArgG		P77247	HxpB		P77366	PgmB		P77366	PgmB
P06987	HisB		P77366	PgmB
P10371	HisA					Module: Homologous recombination			Module: DNA topoisomerase
P06989	HisI		Module: Nucleotide binding, tRNA binding and modification			P0A809	RuvA		P0AES6	GyrB
P60757	HisG		P0A873	TrmD		P0A812	RuvB		P20083	ParE
P60595	HisH		P0A7V0	RpsB		P76256	YeaZ
P60664	HisF		P0AGJ9	TyrS		P28630	HolA		Module: Cysteine synthase
P06988	HisD		P11875	ArgS		P0A873	TrmD		P0ABK5	CysK
P0A6C5	ArgA		P0A809	RuvA					P16703	CysM
P0A6C8	ArgB		P0A812	RuvB		Module: Pyrimidine metabolism
P11446	ArgC		P76256	YeaZ		P07650	DeoA		Module: Shikimate dehydrogenase
P11447	ArgH		P28630	HolA		P0ABF6	Cdd		P0A6D5	YdiB
P00895	TrpE		P0A7L3	RplT					P15770	AroE
P05041	PabB		P0A7Y8	RnpA		Module: Shikimate dehydrogenase
P00903	PabA		P07395	PheT		P0A6D5	YdiB		Module: Molybdenum synthesis
P00904	TrpD		P0A8F8	UvrB		P15770	AroE		P0A738	MoaC
P30177	YbiB		P60785	LepA					P30749	MoaE
P00909	TrpF		P08312	PheS		Module: Cysteine synthase
P0A877	TrpA		P42641	ObgE		P0ABK5	CysK		Module: Purine biosynthesis
P0A879	TrpB		P0A799	Pgk		P16703	CysM		P0AG18	PurE
P18335	ArgD		P0AES6	GyrB					P0A7D7	PurC
P42588	PatA		P20083	ParE		Module: Molybdenum synthesis			P0AG16	PurF
P77581	ArGM		P60340	TruB		P0A738	MoaC		P08244	PyrF
O32583	ThiS		P0AGD7	Ffh		P30749	MoaE		P0A7E3	PyrE
P30139	ThiG		P0ABU2	YchF					P08178	PurM
P30137	ThiE		P10442	RnhB		Module: Ornithine metabolism
P00547	ThrB		P37443	ycaI		P04391	ArgI		Module: Citrate synthase
P00934	ThrC		P0A6P7	EngB		P06960	ArgF		P0ABH7	GltA
P30125	LeuB		P09831	GltB		Q46803	YgeW		P31660	PrpC
P76251	DmlA
P00968	CarB		Module: Cysteine synthase			Module: Purine biosynthesis			Module: Ornithine metabolism
P0A6F1	CarA		P0ABK5	CysK		P0AG18	PurE		P04391	ArgI
P09831	GltB		P16703	CysM		P0A7D7	PurC		P06960	ArgF
P07004	ProA					P0AG16	PurF		Q46803	YgeW
P0A7B5	ProB		Module: Pyrimidine metabolism			P08244	PyrF
P0A9L8	ProC		P07650	DeoA		P0A7E3	PyrE		Module: Aminotransferase
P07623	MetA		P0ABF6	Cdd		P08178	PurM		P0A959	AlaA
P04036	DapB					P15639	PurH		P77434	AlaC
P26281	FolK		Module: Aminotransferase						P77806	YbdL
P07639	AroB		P0A959	AlaA		Module: Cabamoyl-phosphate synthesis
P12008	AroC		P77434	AlaC		P00968	CarB		Module: Pyruvate kinase
P62615	IspE		P77806	YbdL		P0A6F1	CarA		P0AD61	PykF
P0ABQ0	CoaBC								P21599	PykA
P15640	PurD		Module: Transaldolase			Module: Unannotated
P08178	PurM		P0A867	TalA		P39391	YjiT		Module: Proline biosynthesis
P0AG18	PurE		P32669	TalC		P77658	YnaA		P07004	ProA
P0A7D7	PurC		P78055	FsaA					P0A7B5	ProB
P15639	PurH		P0A870	TalB		Module: Alcohol dehydrogenase
P0AG16	PurF					P0A9S5	GldA		Module: Pyridoxal-phosphate transferase
P08244	PyrF		Module: Shikimate dehydrogenase			P45579	HcxA		P18335	ArgD
P0A7E3	PyrE		P0A6D5	YdiB					P77581	ArGM
P07023	TyrA		P15770	AroE		Module: Aminotransferase			P42588	PatA
P0A9J8	PheA					P0A959	AlaA
P09151	LeuA		Module: Pyruvate kinase			P77434	AlaC		Module: Homoserine biosynthesis
P51020	MhpE		P0AD61	PykF		P77806	YbdL		P00561	ThrA
P0A9Z1	GlnB		P21599	PykA					P08660	LysC
P0AC55	GlnK					Module: Pyruvate kinase			P00562	MetL
P69681	AmtB		Module: Ornithine metabolism			P0AD61	PykF
P04391	ArgI		P04391	ArgI		P21599	PykA		Module: Unannotated
P06960	ArgF		P06960	ArgF					P39391	YjiT
Q46803	YgeW		Q46803	YgeW		Module: Citrate synthase			P77658	YnaA
P0A738	MoaC		P0A738	MoaC		P0ABH7	GltA
P30749	MoaE		P30749	MoaE		P31660	PrpC		Module: Alcohol dehydrogenase
P00963	AsnA								P0A9S5	GldA
P0A853	TnaA		Module: Citrate synthase			Module: Proline biosynthesis			P45579	HcxA
P42626	YhaM		P0ABH7	GltA		P07004	ProA
P0A7Z0	RpiA		P31660	PrpC		P0A7B5	ProB		Module: Tyrosine biosynthesis
P28248	PaxA								P07023	TyrA
P0AEZ1	MetF		Module: Thiamine biosynthesis			Module: Pyridoxal-phosphate transferase			P0A9J8	PheA
P07650	DeoA		O32583	ThiS		P18335	ArgD
P0ABF6	Cdd		P30139	ThiG		P77581	ArGM		Module: Arginine biosynthesis
P45578	LuxS		P30137	ThiE		P42588	PatA		P0A6C5	ArgA
P39391	YjiT								P0A6C8	ArgB
P77658	YnaA		Module: Amino acid biosynthesis			Module: Amino acid biosynthesis			P11446	ArgC
P0ABH7	GltA		P62615	IspE		P0A6C5	ArgA
P31660	PrpC		P0AG18	PurE		P0A6C8	ArgB		Module: Histidine biosynthesis
P0ABK5	CysK		P0A7D7	PurC		P11446	ArgC		P10371	HisA
P16703	CysM		P0AG16	PurF		P0A877	TrpA		P06989	HisI
P0A6D5	YdiB		P08244	PyrF		P0A879	TrpB		P06988	HisD
P15770	AroE		P0A7E3	PyrE		P00895	TrpE		P60664	HisF
P0AD61	PykF		P08178	PurM		P0A6A6	LeuC		P60757	HisG
P21599	PykA		P15639	PurH		P00894	IlvH		P06987	HisB
P0A9S5	GldA		P00968	CarB		P0ADF8	IlvN		P60595	HisH
P45579	HcxA		P0A6F1	CarA		P30126	LeuD
P07395	PheT		P26281	FolK		P00904	TrpD		Module: Isocitrate dehydrogenase
P0A8F8	UvrB		P12008	AroC		P30177	YbiB		P30125	LeuB
P60785	LepA		P07623	MetA		P05041	PabB		P76251	DmlA
P08312	PheS		P07023	TyrA		P00903	PabA
P42641	ObgE		P0A9J8	PheA		P00909	TrpF		Module: Tryptophan biosynthesis
P0A7V0	RpsB		P0A6C5	ArgA		P10371	HisA		P0A877	TrpA
P0AGJ9	TyrS		P0A6C8	ArgB		P06989	HisI		P0A879	TrpB
P0A8M3	ThrS		P11446	ArgC		P06988	HisD		P00895	TrpE
P0A799	Pgk		P11447	ArgH		P60664	HisF		P00904	TrpD
P11875	ArgS		P07639	AroB		P60757	HisG		P30177	YbiB
P0AGA2	SecY		P15640	PurD		P06987	HisB		P05041	PabB
P0AES6	GyrB		P00547	ThrB		P60595	HisH		P00903	PabA
P20083	ParE		P00934	ThrC		P0A6E4	ArgG		P00909	TrpF
P0A809	RuvA		P00561	ThrA		P00547	ThrB
P0A812	RuvB		P0A877	TrpA		P00561	ThrA		Module: pyruvate caboxyltransferase
P60340	TruB		P0A879	TrpB		P05793	IlvC		P09151	LeuA
P76256	YeaZ		P00895	TrpE		P08660	LysC		P51020	MhpE
P0A873	TrmD		P0A6A6	LeuC		P00562	MetL
P28630	HolA		P00894	IlvH					Module: Leucine biosynthesis
P0AGD7	Ffh		P0ADF8	IlvN		Module: Tyrosine biosynthesis			P0A6A6	LeuC
P0ABU2	YchF		P09151	LeuA		P07023	TyrA		P30126	LeuD
P10442	RnhB		P30126	LeuD		P0A9J8	PheA
P37443	ycaI		P51020	MhpE					Module: Isoleucine biosynthesis
P0A6P7	EngB		P00904	TrpD		Module: Isocitrate dehydrogenase			P00894	IlvH
P0A7L3	RplT		P30177	YbiB		P30125	LeuB		P0ADF8	IlvN
P0A7Y8	RnpA		P05041	PabB		P76251	DmlA
P0A959	AlaA		P0A9L8	ProC					Module: Thiamine biosynthesis
P77434	AlaC		P00903	PabA		Module: Pyruvate carboxyltransferase			O32583	ThiS
P77806	YbdL		P07004	ProA		P09151	LeuA		P30139	ThiG
P0A867	TalA		P00909	TrpF		P51020	MhpE		P30137	ThiE
P32669	TalC		P10371	HisA
P78055	FsaA		P06989	HisI		Module: Transaldolase			Module: Transaldolase
P0A870	TalB		P06988	HisD		P0A867	TalA		P0A867	TalA
P31467	YieH		P30125	LeuB		P32669	TalC		P32669	TalC
P77475	YqaB		P60664	HisF		P78055	FsaA		P78055	FsaA
P77625	HxpA		P76251	DmlA		P0A870	TalB		P0A870	TalB
P77247	HxpB		P60757	HisG
P77366	PgmB		P06987	HisB		Module: Thiamine biosynthesis
			P60595	HisH		O32583	ThiS
			P0A6E4	ArgG		P30139	ThiG
			P05793	IlvC		P30137	ThiE
			P08660	LysC
			P00562	MetL
			P18335	ArgD
			P77581	ArGM
			P42588	PatA
			Module: Unannotated
			P39391	YjiT
			P77658	YnaA
			Module: Alcohol dehydrogenase
			P0A9S5	GldA
			P45579	HcxA

## Sheet: SD50
	ThrA	MetL	LysC	IlvH	IlvN	LeuC	LeuD	IlvC	ArgG	HisB	HisA	HisI	HisG	HisH	HisF	HisD	ArgA	ArgB	ArgC	ArgH	TrpE	PabB	PabA	TrpD	YbiB	TrpF	TrpA	TrpB	ArgD	PatA	ArGM	ThiS	ThiG	ThiE	ThrB	ThrC	LeuB	DmlA	CarB	CarA	GltB	ProA	ProB	ProC	MetA	DapB	FolK	AroB	AroC
ThrA	1	1	1	1	1	1	1	1	1	1	1	1	1	1	1	1	1	1	1	1	1	1	1	1	1	1	1	1	1	1	1	1	1	1	1	1	1	1	1	1	1	1	1	1	1	1	1	1	1
MetL	1	1	1	1	1	1	1	1	1	1	1	1	1	1	1	1	1	1	1	1	1	1	1	1	1	1	1	1	1	1	1	1	1	1	1	1	1	1	1	1	1	1	1	1	1	1	1	1	1
LysC	1	1	1	1	1	1	1	1	1	1	1	1	1	1	1	1	1	1	1	1	1	1	1	1	1	1	1	1	1	1	1	1	1	1	1	1	1	1	1	1	1	1	1	1	1	1	1	1	1
IlvH	1	1	1	1	1	1	1	1	1	1	1	1	1	1	1	1	1	1	1	1	1	1	1	1	1	1	1	1	1	1	1	1	1	1	1	1	1	1	1	1	1	1	1	1	1	1	1	1	1
IlvN	1	1	1	1	1	1	1	1	1	1	1	1	1	1	1	1	1	1	1	1	1	1	1	1	1	1	1	1	1	1	1	1	1	1	1	1	1	1	1	1	1	1	1	1	1	1	1	1	1
LeuC	1	1	1	1	1	1	1	1	1	1	1	1	1	1	1	1	1	1	1	1	1	1	1	1	1	1	1	1	1	1	1	1	1	1	1	1	1	1	1	1	1	1	1	1	1	1	1	1	1
LeuD	1	1	1	1	1	1	1	1	1	1	1	1	1	1	1	1	1	1	1	1	1	1	1	1	1	1	1	1	1	1	1	1	1	1	1	1	1	1	1	1	1	1	1	1	1	1	1	1	1
IlvC	1	1	1	1	1	1	1	1	1	1	1	1	1	1	1	1	1	1	1	1	1	1	1	1	1	1	1	1	1	1	1	1	1	1	1	1	1	1	1	1	1	1	1	1	1	1	1	1	1
ArgG	1	1	1	1	1	1	1	1	1	1	1	1	1	1	1	1	1	1	1	1	1	1	1	1	1	1	1	1	1	1	1	1	1	1	1	1	1	1	1	1	1	1	1	1	1	1	1	1	1
HisB	1	1	1	1	1	1	1	1	1	1	1	1	1	1	1	1	1	1	1	1	1	1	1	1	1	1	1	1	1	1	1	1	1	1	1	1	1	1	1	1	1	1	1	1	1	1	1	1	1
HisA	1	1	1	1	1	1	1	1	1	1	1	1	1	1	1	1	1	1	1	1	1	1	1	1	1	1	1	1	1	1	1	1	1	1	1	1	1	1	1	1	1	1	1	1	1	1	1	1	1
HisI	1	1	1	1	1	1	1	1	1	1	1	1	1	1	1	1	1	1	1	1	1	1	1	1	1	1	1	1	1	1	1	1	1	1	1	1	1	1	1	1	1	1	1	1	1	1	1	1	1
HisG	1	1	1	1	1	1	1	1	1	1	1	1	1	1	1	1	1	1	1	1	1	1	1	1	1	1	1	1	1	1	1	1	1	1	1	1	1	1	1	1	1	1	1	1	1	1	1	1	1
HisH	1	1	1	1	1	1	1	1	1	1	1	1	1	1	1	1	1	1	1	1	1	1	1	1	1	1	1	1	1	1	1	1	1	1	1	1	1	1	1	1	1	1	1	1	1	1	1	1	1
HisF	1	1	1	1	1	1	1	1	1	1	1	1	1	1	1	1	1	1	1	1	1	1	1	1	1	1	1	1	1	1	1	1	1	1	1	1	1	1	1	1	1	1	1	1	1	1	1	1	1
HisD	1	1	1	1	1	1	1	1	1	1	1	1	1	1	1	1	1	1	1	1	1	1	1	1	1	1	1	1	1	1	1	1	1	1	1	1	1	1	1	1	1	1	1	1	1	1	1	1	1
ArgA	1	1	1	1	1	1	1	1	1	1	1	1	1	1	1	1	1	1	1	1	1	1	1	1	1	1	1	1	1	1	1	1	1	1	1	1	1	1	1	1	1	1	1	1	1	1	1	1	1
ArgB	1	1	1	1	1	1	1	1	1	1	1	1	1	1	1	1	1	1	1	1	1	1	1	1	1	1	1	1	1	1	1	1	1	1	1	1	1	1	1	1	1	1	1	1	1	1	1	1	1
ArgC	1	1	1	1	1	1	1	1	1	1	1	1	1	1	1	1	1	1	1	1	1	1	1	1	1	1	1	1	1	1	1	1	1	1	1	1	1	1	1	1	1	1	1	1	1	1	1	1	1
ArgH	1	1	1	1	1	1	1	1	1	1	1	1	1	1	1	1	1	1	1	1	1	1	1	1	1	1	1	1	1	1	1	1	1	1	1	1	1	1	1	1	1	1	1	1	1	1	1	1	1
TrpE	1	1	1	1	1	1	1	1	1	1	1	1	1	1	1	1	1	1	1	1	1	1	1	1	1	1	1	1	1	1	1	1	1	1	1	1	1	1	1	1	1	1	1	1	1	1	1	1	1
PabB	1	1	1	1	1	1	1	1	1	1	1	1	1	1	1	1	1	1	1	1	1	1	1	1	1	1	1	1	1	1	1	1	1	1	1	1	1	1	1	1	1	1	1	1	1	1	1	1	1
PabA	1	1	1	1	1	1	1	1	1	1	1	1	1	1	1	1	1	1	1	1	1	1	1	1	1	1	1	1	1	1	1	1	1	1	1	1	1	1	1	1	1	1	1	1	1	1	1	1	1
TrpD	1	1	1	1	1	1	1	1	1	1	1	1	1	1	1	1	1	1	1	1	1	1	1	1	1	1	1	1	1	1	1	1	1	1	1	1	1	1	1	1	1	1	1	1	1	1	1	1	1
YbiB	1	1	1	1	1	1	1	1	1	1	1	1	1	1	1	1	1	1	1	1	1	1	1	1	1	1	1	1	1	1	1	1	1	1	1	1	1	1	1	1	1	1	1	1	1	1	1	1	1
TrpF	1	1	1	1	1	1	1	1	1	1	1	1	1	1	1	1	1	1	1	1	1	1	1	1	1	1	1	1	1	1	1	1	1	1	1	1	1	1	1	1	1	1	1	1	1	1	1	1	1
TrpA	1	1	1	1	1	1	1	1	1	1	1	1	1	1	1	1	1	1	1	1	1	1	1	1	1	1	1	1	1	1	1	1	1	1	1	1	1	1	1	1	1	1	1	1	1	1	1	1	1
TrpB	1	1	1	1	1	1	1	1	1	1	1	1	1	1	1	1	1	1	1	1	1	1	1	1	1	1	1	1	1	1	1	1	1	1	1	1	1	1	1	1	1	1	1	1	1	1	1	1	1
ArgD	1	1	1	1	1	1	1	1	1	1	1	1	1	1	1	1	1	1	1	1	1	1	1	1	1	1	1	1	1	1	1	1	1	1	1	1	1	1	1	1	1	1	1	1	1	1	1	1	1
PatA	1	1	1	1	1	1	1	1	1	1	1	1	1	1	1	1	1	1	1	1	1	1	1	1	1	1	1	1	1	1	1	1	1	1	1	1	1	1	1	1	1	1	1	1	1	1	1	1	1
ArGM	1	1	1	1	1	1	1	1	1	1	1	1	1	1	1	1	1	1	1	1	1	1	1	1	1	1	1	1	1	1	1	1	1	1	1	1	1	1	1	1	1	1	1	1	1	1	1	1	1
ThiS	1	1	1	1	1	1	1	1	1	1	1	1	1	1	1	1	1	1	1	1	1	1	1	1	1	1	1	1	1	1	1	1	1	1	1	1	1	1	1	1	1	1	1	1	1	1	1	1	1
ThiG	1	1	1	1	1	1	1	1	1	1	1	1	1	1	1	1	1	1	1	1	1	1	1	1	1	1	1	1	1	1	1	1	1	1	1	1	1	1	1	1	1	1	1	1	1	1	1	1	1
ThiE	1	1	1	1	1	1	1	1	1	1	1	1	1	1	1	1	1	1	1	1	1	1	1	1	1	1	1	1	1	1	1	1	1	1	1	1	1	1	1	1	1	1	1	1	1	1	1	1	1
ThrB	1	1	1	1	1	1	1	1	1	1	1	1	1	1	1	1	1	1	1	1	1	1	1	1	1	1	1	1	1	1	1	1	1	1	1	1	1	1	1	1	1	1	1	1	1	1	1	1	1
ThrC	1	1	1	1	1	1	1	1	1	1	1	1	1	1	1	1	1	1	1	1	1	1	1	1	1	1	1	1	1	1	1	1	1	1	1	1	1	1	1	1	1	1	1	1	1	1	1	1	1
LeuB	1	1	1	1	1	1	1	1	1	1	1	1	1	1	1	1	1	1	1	1	1	1	1	1	1	1	1	1	1	1	1	1	1	1	1	1	1	1	1	1	1	1	1	1	1	1	1	1	1
DmlA	1	1	1	1	1	1	1	1	1	1	1	1	1	1	1	1	1	1	1	1	1	1	1	1	1	1	1	1	1	1	1	1	1	1	1	1	1	1	1	1	1	1	1	1	1	1	1	1	1
CarB	1	1	1	1	1	1	1	1	1	1	1	1	1	1	1	1	1	1	1	1	1	1	1	1	1	1	1	1	1	1	1	1	1	1	1	1	1	1	1	1	1	1	1	1	1	1	1	1	1
CarA	1	1	1	1	1	1	1	1	1	1	1	1	1	1	1	1	1	1	1	1	1	1	1	1	1	1	1	1	1	1	1	1	1	1	1	1	1	1	1	1	1	1	1	1	1	1	1	1	1
GltB	1	1	1	1	1	1	1	1	1	1	1	1	1	1	1	1	1	1	1	1	1	1	1	1	1	1	1	1	1	1	1	1	1	1	1	1	1	1	1	1	1	1	1	1	1	1	1	1	1
ProA	1	1	1	1	1	1	1	1	1	1	1	1	1	1	1	1	1	1	1	1	1	1	1	1	1	1	1	1	1	1	1	1	1	1	1	1	1	1	1	1	1	1	1	1	1	1	1	1	1
ProB	1	1	1	1	1	1	1	1	1	1	1	1	1	1	1	1	1	1	1	1	1	1	1	1	1	1	1	1	1	1	1	1	1	1	1	1	1	1	1	1	1	1	1	1	1	1	1	1	1
ProC	1	1	1	1	1	1	1	1	1	1	1	1	1	1	1	1	1	1	1	1	1	1	1	1	1	1	1	1	1	1	1	1	1	1	1	1	1	1	1	1	1	1	1	1	1	1	1	1	1
MetA	1	1	1	1	1	1	1	1	1	1	1	1	1	1	1	1	1	1	1	1	1	1	1	1	1	1	1	1	1	1	1	1	1	1	1	1	1	1	1	1	1	1	1	1	1	1	1	1	1
DapB	1	1	1	1	1	1	1	1	1	1	1	1	1	1	1	1	1	1	1	1	1	1	1	1	1	1	1	1	1	1	1	1	1	1	1	1	1	1	1	1	1	1	1	1	1	1	1	1	1
FolK	1	1	1	1	1	1	1	1	1	1	1	1	1	1	1	1	1	1	1	1	1	1	1	1	1	1	1	1	1	1	1	1	1	1	1	1	1	1	1	1	1	1	1	1	1	1	1	1	1
AroB	1	1	1	1	1	1	1	1	1	1	1	1	1	1	1	1	1	1	1	1	1	1	1	1	1	1	1	1	1	1	1	1	1	1	1	1	1	1	1	1	1	1	1	1	1	1	1	1	1
AroC	1	1	1	1	1	1	1	1	1	1	1	1	1	1	1	1	1	1	1	1	1	1	1	1	1	1	1	1	1	1	1	1	1	1	1	1	1	1	1	1	1	1	1	1	1	1	1	1	1
IspE	1	1	1	1	1	1	1	1	1	1	1	1	1	1	1	1	1	1	1	1	1	1	1	1	1	1	1	1	1	1	1	1	1	1	1	1	1	1	1	1	1	1	1	1	1	1	1	1	1
CoaBC	1	1	1	1	1	1	1	1	1	1	1	1	1	1	1	1	1	1	1	1	1	1	1	1	1	1	1	1	1	1	1	1	1	1	1	1	1	1	1	1	1	1	1	1	1	1	1	1	1
PurD	1	1	1	1	1	1	1	1	1	1	1	1	1	1	1	1	1	1	1	1	1	1	1	1	1	1	1	1	1	1	1	1	1	1	1	1	1	1	1	1	1	1	1	1	1	1	1	1	1
PurM	1	1	1	1	1	1	1	1	1	1	1	1	1	1	1	1	1	1	1	1	1	1	1	1	1	1	1	1	1	1	1	1	1	1	1	1	1	1	1	1	1	1	1	1	1	1	1	1	1
PurE	1	1	1	1	1	1	1	1	1	1	1	1	1	1	1	1	1	1	1	1	1	1	1	1	1	1	1	1	1	1	1	1	1	1	1	1	1	1	1	1	1	1	1	1	1	1	1	1	1
PurC	1	1	1	1	1	1	1	1	1	1	1	1	1	1	1	1	1	1	1	1	1	1	1	1	1	1	1	1	1	1	1	1	1	1	1	1	1	1	1	1	1	1	1	1	1	1	1	1	1
PurH	1	1	1	1	1	1	1	1	1	1	1	1	1	1	1	1	1	1	1	1	1	1	1	1	1	1	1	1	1	1	1	1	1	1	1	1	1	1	1	1	1	1	1	1	1	1	1	1	1
PurF	1	1	1	1	1	1	1	1	1	1	1	1	1	1	1	1	1	1	1	1	1	1	1	1	1	1	1	1	1	1	1	1	1	1	1	1	1	1	1	1	1	1	1	1	1	1	1	1	1
PyrF	1	1	1	1	1	1	1	1	1	1	1	1	1	1	1	1	1	1	1	1	1	1	1	1	1	1	1	1	1	1	1	1	1	1	1	1	1	1	1	1	1	1	1	1	1	1	1	1	1
PyrE	1	1	1	1	1	1	1	1	1	1	1	1	1	1	1	1	1	1	1	1	1	1	1	1	1	1	1	1	1	1	1	1	1	1	1	1	1	1	1	1	1	1	1	1	1	1	1	1	1
TyrA	1	1	1	1	1	1	1	1	1	1	1	1	1	1	1	1	1	1	1	1	1	1	1	1	1	1	1	1	1	1	1	1	1	1	1	1	1	1	1	1	1	1	1	1	1	1	1	1	1
PheA	1	1	1	1	1	1	1	1	1	1	1	1	1	1	1	1	1	1	1	1	1	1	1	1	1	1	1	1	1	1	1	1	1	1	1	1	1	1	1	1	1	1	1	1	1	1	1	1	1
LeuA	1	1	1	1	1	1	1	1	1	1	1	1	1	1	1	1	1	1	1	1	1	1	1	1	1	1	1	1	1	1	1	1	1	1	1	1	1	1	1	1	1	1	1	1	1	1	1	1	1
MhpE	1	1	1	1	1	1	1	1	1	1	1	1	1	1	1	1	1	1	1	1	1	1	1	1	1	1	1	1	1	1	1	1	1	1	1	1	1	1	1	1	1	1	1	1	1	1	1	1	1
GlnB	1	1	1	1	1	1	1	1	1	1	1	1	1	1	1	1	1	1	1	1	1	1	1	1	1	1	1	1	1	1	1	1	1	1	1	1	1	1	1	1	1	1	1	1	1	1	1	1	1
GlnK	1	1	1	1	1	1	1	1	1	1	1	1	1	1	1	1	1	1	1	1	1	1	1	1	1	1	1	1	1	1	1	1	1	1	1	1	1	1	1	1	1	1	1	1	1	1	1	1	1
AmtB	1	1	1	1	1	1	1	1	1	1	1	1	1	1	1	1	1	1	1	1	1	1	1	1	1	1	1	1	1	1	1	1	1	1	1	1	1	1	1	1	1	1	1	1	1	1	1	1	1
ArgI	1	1	1	1	1	1	1	1	1	1	1	1	1	1	1	1	1	1	1	1	1	1	1	1	1	1	1	1	1	1	1	1	1	1	1	1	1	1	1	1	1	1	1	1	1	1	1	1	1
ArgF	1	1	1	1	1	1	1	1	1	1	1	1	1	1	1	1	1	1	1	1	1	1	1	1	1	1	1	1	1	1	1	1	1	1	1	1	1	1	1	1	1	1	1	1	1	1	1	1	1
YgeW	1	1	1	1	1	1	1	1	1	1	1	1	1	1	1	1	1	1	1	1	1	1	1	1	1	1	1	1	1	1	1	1	1	1	1	1	1	1	1	1	1	1	1	1	1	1	1	1	1
MoaC	1	1	1	1	1	1	1	1	1	1	1	1	1	1	1	1	1	1	1	1	1	1	1	1	1	1	1	1	1	1	1	1	1	1	1	1	1	1	1	1	1	1	1	1	1	1	1	1	1
MoaE	1	1	1	1	1	1	1	1	1	1	1	1	1	1	1	1	1	1	1	1	1	1	1	1	1	1	1	1	1	1	1	1	1	1	1	1	1	1	1	1	1	1	1	1	1	1	1	1	1
AsnA	1	1	1	1	1	1	1	1	1	1	1	1	1	1	1	1	1	1	1	1	1	1	1	1	1	1	1	1	1	1	1	1	1	1	1	1	1	1	1	1	1	1	1	1	1	1	1	1	1
TnaA	1	1	1	1	1	1	1	1	1	1	1	1	1	1	1	1	1	1	1	1	1	1	1	1	1	1	1	1	1	1	1	1	1	1	1	1	1	1	1	1	1	1	1	1	1	1	1	1	1
YhaM	1	1	1	1	1	1	1	1	1	1	1	1	1	1	1	1	1	1	1	1	1	1	1	1	1	1	1	1	1	1	1	1	1	1	1	1	1	1	1	1	1	1	1	1	1	1	1	1	1
RpiA	1	1	1	1	1	1	1	1	1	1	1	1	1	1	1	1	1	1	1	1	1	1	1	1	1	1	1	1	1	1	1	1	1	1	1	1	1	1	1	1	1	1	1	1	1	1	1	1	1
PaxA	1	1	1	1	1	1	1	1	1	1	1	1	1	1	1	1	1	1	1	1	1	1	1	1	1	1	1	1	1	1	1	1	1	1	1	1	1	1	1	1	1	1	1	1	1	1	1	1	1
MetF	1	1	1	1	1	1	1	1	1	1	1	1	1	1	1	1	1	1	1	1	1	1	1	1	1	1	1	1	1	1	1	1	1	1	1	1	1	1	1	1	1	1	1	1	1	1	1	1	1
DeoA	1	1	1	1	1	1	1	1	1	1	1	1	1	1	1	1	1	1	1	1	1	1	1	1	1	1	1	1	1	1	1	1	1	1	1	1	1	1	1	1	1	1	1	1	1	1	1	1	1
Cdd	1	1	1	1	1	1	1	1	1	1	1	1	1	1	1	1	1	1	1	1	1	1	1	1	1	1	1	1	1	1	1	1	1	1	1	1	1	1	1	1	1	1	1	1	1	1	1	1	1
LuxS	1	1	1	1	1	1	1	1	1	1	1	1	1	1	1	1	1	1	1	1	1	1	1	1	1	1	1	1	1	1	1	1	1	1	1	1	1	1	1	1	1	1	1	1	1	1	1	1	1
YjiT	1	1	1	1	1	1	1	1	1	1	1	1	1	1	1	1	1	1	1	1	1	1	1	1	1	1	1	1	1	1	1	1	1	1	1	1	1	1	1	1	1	1	1	1	1	1	1	1	1
YnaA	1	1	1	1	1	1	1	1	1	1	1	1	1	1	1	1	1	1	1	1	1	1	1	1	1	1	1	1	1	1	1	1	1	1	1	1	1	1	1	1	1	1	1	1	1	1	1	1	1
GltA	1	1	1	1	1	1	1	1	1	1	1	1	1	1	1	1	1	1	1	1	1	1	1	1	1	1	1	1	1	1	1	1	1	1	1	1	1	1	1	1	1	1	1	1	1	1	1	1	1
PrpC	1	1	1	1	1	1	1	1	1	1	1	1	1	1	1	1	1	1	1	1	1	1	1	1	1	1	1	1	1	1	1	1	1	1	1	1	1	1	1	1	1	1	1	1	1	1	1	1	1
CysK	1	1	1	1	1	1	1	1	1	1	1	1	1	1	1	1	1	1	1	1	1	1	1	1	1	1	1	1	1	1	1	1	1	1	1	1	1	1	1	1	1	1	1	1	1	1	1	1	1
CysM	1	1	1	1	1	1	1	1	1	1	1	1	1	1	1	1	1	1	1	1	1	1	1	1	1	1	1	1	1	1	1	1	1	1	1	1	1	1	1	1	1	1	1	1	1	1	1	1	1
YdiB	1	1	1	1	1	1	1	1	1	1	1	1	1	1	1	1	1	1	1	1	1	1	1	1	1	1	1	1	1	1	1	1	1	1	1	1	1	1	1	1	1	1	1	1	1	1	1	1	1
AroE	1	1	1	1	1	1	1	1	1	1	1	1	1	1	1	1	1	1	1	1	1	1	1	1	1	1	1	1	1	1	1	1	1	1	1	1	1	1	1	1	1	1	1	1	1	1	1	1	1
PykF	1	1	1	1	1	1	1	1	1	1	1	1	1	1	1	1	1	1	1	1	1	1	1	1	1	1	1	1	1	1	1	1	1	1	1	1	1	1	1	1	1	1	1	1	1	1	1	1	1
PykA	1	1	1	1	1	1	1	1	1	1	1	1	1	1	1	1	1	1	1	1	1	1	1	1	1	1	1	1	1	1	1	1	1	1	1	1	1	1	1	1	1	1	1	1	1	1	1	1	1
GldA	1	1	1	1	1	1	1	1	1	1	1	1	1	1	1	1	1	1	1	1	1	1	1	1	1	1	1	1	1	1	1	1	1	1	1	1	1	1	1	1	1	1	1	1	1	1	1	1	1
HcxA	1	1	1	1	1	1	1	1	1	1	1	1	1	1	1	1	1	1	1	1	1	1	1	1	1	1	1	1	1	1	1	1	1	1	1	1	1	1	1	1	1	1	1	1	1	1	1	1	1
PheT	1	1	1	1	1	1	1	1	1	1	1	1	1	1	1	1	1	1	1	1	1	1	1	1	1	1	1	1	1	1	1	1	1	1	1	1	1	1	1	1	1	1	1	1	1	1	1	1	1
UvrB	1	1	1	1	1	1	1	1	1	1	1	1	1	1	1	1	1	1	1	1	1	1	1	1	1	1	1	1	1	1	1	1	1	1	1	1	1	1	1	1	1	1	1	1	1	1	1	1	1
LepA	1	1	1	1	1	1	1	1	1	1	1	1	1	1	1	1	1	1	1	1	1	1	1	1	1	1	1	1	1	1	1	1	1	1	1	1	1	1	1	1	1	1	1	1	1	1	1	1	1
PheS	1	1	1	1	1	1	1	1	1	1	1	1	1	1	1	1	1	1	1	1	1	1	1	1	1	1	1	1	1	1	1	1	1	1	1	1	1	1	1	1	1	1	1	1	1	1	1	1	1
ObgE	1	1	1	1	1	1	1	1	1	1	1	1	1	1	1	1	1	1	1	1	1	1	1	1	1	1	1	1	1	1	1	1	1	1	1	1	1	1	1	1	1	1	1	1	1	1	1	1	1
RpsB	1	1	1	1	1	1	1	1	1	1	1	1	1	1	1	1	1	1	1	1	1	1	1	1	1	1	1	1	1	1	1	1	1	1	1	1	1	1	1	1	1	1	1	1	1	1	1	1	1
TyrS	1	1	1	1	1	1	1	1	1	1	1	1	1	1	1	1	1	1	1	1	1	1	1	1	1	1	1	1	1	1	1	1	1	1	1	1	1	1	1	1	1	1	1	1	1	1	1	1	1
ThrS	1	1	1	1	1	1	1	1	1	1	1	1	1	1	1	1	1	1	1	1	1	1	1	1	1	1	1	1	1	1	1	1	1	1	1	1	1	1	1	1	1	1	1	1	1	1	1	1	1
Pgk	1	1	1	1	1	1	1	1	1	1	1	1	1	1	1	1	1	1	1	1	1	1	1	1	1	1	1	1	1	1	1	1	1	1	1	1	1	1	1	1	1	1	1	1	1	1	1	1	1
ArgS	1	1	1	1	1	1	1	1	1	1	1	1	1	1	1	1	1	1	1	1	1	1	1	1	1	1	1	1	1	1	1	1	1	1	1	1	1	1	1	1	1	1	1	1	1	1	1	1	1
SecY	1	1	1	1	1	1	1	1	1	1	1	1	1	1	1	1	1	1	1	1	1	1	1	1	1	1	1	1	1	1	1	1	1	1	1	1	1	1	1	1	1	1	1	1	1	1	1	1	1
GyrB	1	1	1	1	1	1	1	1	1	1	1	1	1	1	1	1	1	1	1	1	1	1	1	1	1	1	1	1	1	1	1	1	1	1	1	1	1	1	1	1	1	1	1	1	1	1	1	1	1
ParE	1	1	1	1	1	1	1	1	1	1	1	1	1	1	1	1	1	1	1	1	1	1	1	1	1	1	1	1	1	1	1	1	1	1	1	1	1	1	1	1	1	1	1	1	1	1	1	1	1
RuvA	1	1	1	1	1	1	1	1	1	1	1	1	1	1	1	1	1	1	1	1	1	1	1	1	1	1	1	1	1	1	1	1	1	1	1	1	1	1	1	1	1	1	1	1	1	1	1	1	1
RuvB	1	1	1	1	1	1	1	1	1	1	1	1	1	1	1	1	1	1	1	1	1	1	1	1	1	1	1	1	1	1	1	1	1	1	1	1	1	1	1	1	1	1	1	1	1	1	1	1	1
TruB	1	1	1	1	1	1	1	1	1	1	1	1	1	1	1	1	1	1	1	1	1	1	1	1	1	1	1	1	1	1	1	1	1	1	1	1	1	1	1	1	1	1	1	1	1	1	1	1	1
YeaZ	1	1	1	1	1	1	1	1	1	1	1	1	1	1	1	1	1	1	1	1	1	1	1	1	1	1	1	1	1	1	1	1	1	1	1	1	1	1	1	1	1	1	1	1	1	1	1	1	1
TrmD	1	1	1	1	1	1	1	1	1	1	1	1	1	1	1	1	1	1	1	1	1	1	1	1	1	1	1	1	1	1	1	1	1	1	1	1	1	1	1	1	1	1	1	1	1	1	1	1	1
HolA	1	1	1	1	1	1	1	1	1	1	1	1	1	1	1	1	1	1	1	1	1	1	1	1	1	1	1	1	1	1	1	1	1	1	1	1	1	1	1	1	1	1	1	1	1	1	1	1	1
Ffh	1	1	1	1	1	1	1	1	1	1	1	1	1	1	1	1	1	1	1	1	1	1	1	1	1	1	1	1	1	1	1	1	1	1	1	1	1	1	1	1	1	1	1	1	1	1	1	1	1
YchF	1	1	1	1	1	1	1	1	1	1	1	1	1	1	1	1	1	1	1	1	1	1	1	1	1	1	1	1	1	1	1	1	1	1	1	1	1	1	1	1	1	1	1	1	1	1	1	1	1
RnhB	1	1	1	1	1	1	1	1	1	1	1	1	1	1	1	1	1	1	1	1	1	1	1	1	1	1	1	1	1	1	1	1	1	1	1	1	1	1	1	1	1	1	1	1	1	1	1	1	1
ycaI	1	1	1	1	1	1	1	1	1	1	1	1	1	1	1	1	1	1	1	1	1	1	1	1	1	1	1	1	1	1	1	1	1	1	1	1	1	1	1	1	1	1	1	1	1	1	1	1	1
EngB	1	1	1	1	1	1	1	1	1	1	1	1	1	1	1	1	1	1	1	1	1	1	1	1	1	1	1	1	1	1	1	1	1	1	1	1	1	1	1	1	1	1	1	1	1	1	1	1	1
RplT	1	1	1	1	1	1	1	1	1	1	1	1	1	1	1	1	1	1	1	1	1	1	1	1	1	1	1	1	1	1	1	1	1	1	1	1	1	1	1	1	1	1	1	1	1	1	1	1	1
RnpA	1	1	1	1	1	1	1	1	1	1	1	1	1	1	1	1	1	1	1	1	1	1	1	1	1	1	1	1	1	1	1	1	1	1	1	1	1	1	1	1	1	1	1	1	1	1	1	1	1
AlaA	1	1	1	1	1	1	1	1	1	1	1	1	1	1	1	1	1	1	1	1	1	1	1	1	1	1	1	1	1	1	1	1	1	1	1	1	1	1	1	1	1	1	1	1	1	1	1	1	1
AlaC	1	1	1	1	1	1	1	1	1	1	1	1	1	1	1	1	1	1	1	1	1	1	1	1	1	1	1	1	1	1	1	1	1	1	1	1	1	1	1	1	1	1	1	1	1	1	1	1	1
YbdL	1	1	1	1	1	1	1	1	1	1	1	1	1	1	1	1	1	1	1	1	1	1	1	1	1	1	1	1	1	1	1	1	1	1	1	1	1	1	1	1	1	1	1	1	1	1	1	1	1
TalA	1	1	1	1	1	1	1	1	1	1	1	1	1	1	1	1	1	1	1	1	1	1	1	1	1	1	1	1	1	1	1	1	1	1	1	1	1	1	1	1	1	1	1	1	1	1	1	1	1
TalC	1	1	1	1	1	1	1	1	1	1	1	1	1	1	1	1	1	1	1	1	1	1	1	1	1	1	1	1	1	1	1	1	1	1	1	1	1	1	1	1	1	1	1	1	1	1	1	1	1
FsaA	1	1	1	1	1	1	1	1	1	1	1	1	1	1	1	1	1	1	1	1	1	1	1	1	1	1	1	1	1	1	1	1	1	1	1	1	1	1	1	1	1	1	1	1	1	1	1	1	1
TalB	1	1	1	1	1	1	1	1	1	1	1	1	1	1	1	1	1	1	1	1	1	1	1	1	1	1	1	1	1	1	1	1	1	1	1	1	1	1	1	1	1	1	1	1	1	1	1	1	1
YieH	1	1	1	1	1	1	1	1	1	1	1	1	1	1	1	1	1	1	1	1	1	1	1	1	1	1	1	1	1	1	1	1	1	1	1	1	1	1	1	1	1	1	1	1	1	1	1	1	1
YqaB	1	1	1	1	1	1	1	1	1	1	1	1	1	1	1	1	1	1	1	1	1	1	1	1	1	1	1	1	1	1	1	1	1	1	1	1	1	1	1	1	1	1	1	1	1	1	1	1	1
HxpA	1	1	1	1	1	1	1	1	1	1	1	1	1	1	1	1	1	1	1	1	1	1	1	1	1	1	1	1	1	1	1	1	1	1	1	1	1	1	1	1	1	1	1	1	1	1	1	1	1
HxpB	1	1	1	1	1	1	1	1	1	1	1	1	1	1	1	1	1	1	1	1	1	1	1	1	1	1	1	1	1	1	1	1	1	1	1	1	1	1	1	1	1	1	1	1	1	1	1	1	1
PgmB	1	1	1	1	1	1	1	1	1	1	1	1	1	1	1	1	1	1	1	1	1	1	1	1	1	1	1	1	1	1	1	1	1	1	1	1	1	1	1	1	1	1	1	1	1	1	1	1	1
[truncated: 81 more columns]

## Sheet: SD150
	ThrA	MetL	LysC	IlvH	IlvN	LeuC	LeuD	IlvC	ArgG	HisB	HisA	HisI	HisG	HisH	HisF	HisD	ArgA	ArgB	ArgC	ArgH	TrpE	PabB	PabA	TrpD	YbiB	TrpF	TrpA	TrpB	ArgD	PatA	ArGM	ThiS	ThiG	ThiE	ThrB	ThrC	LeuB	DmlA	CarB	CarA	GltB	ProA	ProB	ProC	MetA	DapB	FolK	AroB	AroC
ThrA	1	1	1	0	0	0	0	1	1	1	1	1	1	1	1	0	0	1	1	0	0	0	0	0	0	0	0	1	0	0	0	0	0	0	1	1	0	0	1	0	0	0	0	0	1	0	0	0	0
MetL	1	1	1	0	0	0	0	1	1	1	1	1	1	1	1	0	0	1	1	0	0	0	0	0	0	0	0	1	0	0	0	0	0	0	1	1	0	0	1	0	0	0	0	0	1	0	0	0	0
LysC	1	1	1	0	0	0	0	1	1	1	0	0	0	0	0	0	0	0	0	0	0	0	0	0	0	0	0	0	0	0	0	0	0	0	1	0	0	0	0	0	0	0	0	0	0	0	0	0	0
IlvH	0	0	0	1	1	1	1	1	1	1	1	1	1	1	1	0	1	1	1	0	0	0	0	0	1	1	1	1	0	0	0	0	0	0	0	0	0	0	0	0	0	0	0	0	0	0	0	0	0
IlvN	0	0	0	1	1	1	1	1	1	1	1	1	1	1	1	0	1	1	1	0	0	0	0	0	1	1	1	1	0	0	0	0	0	0	0	0	0	0	0	0	0	0	0	0	0	0	0	0	0
LeuC	0	0	0	1	1	1	1	1	1	0	0	1	1	1	0	0	1	1	1	0	0	0	0	0	0	1	1	0	0	0	0	0	0	0	0	0	1	1	0	0	0	1	0	0	0	0	0	0	0
LeuD	0	0	0	1	1	1	1	1	1	1	0	1	1	1	1	0	1	1	1	0	0	0	0	1	0	1	1	0	0	0	0	0	0	0	0	0	1	1	0	0	0	1	0	0	0	0	0	0	0
IlvC	1	1	1	1	1	1	1	1	1	1	1	1	1	1	1	1	1	1	1	1	0	0	0	1	1	1	1	1	0	0	0	0	0	0	1	1	1	1	0	0	0	1	1	0	1	0	0	0	0
ArgG	1	1	1	1	1	1	1	1	1	1	1	1	1	1	1	1	1	1	1	1	0	0	0	1	1	1	1	1	0	0	0	0	0	0	0	1	1	1	0	1	1	1	1	0	1	0	0	0	0
HisB	1	1	1	1	1	0	1	1	1	1	1	1	1	1	1	1	0	1	1	0	0	0	1	1	1	1	1	1	0	0	0	0	0	0	1	0	0	0	1	1	0	0	0	0	0	0	0	0	0
HisA	1	1	0	1	1	0	0	1	1	1	1	1	1	1	1	1	0	1	1	0	0	0	1	1	1	1	1	1	0	0	0	0	0	0	0	0	0	0	0	0	0	0	0	0	0	0	0	0	0
HisI	1	1	0	1	1	1	1	1	1	1	1	1	1	1	1	1	1	1	1	1	0	0	1	1	1	1	1	1	1	1	1	0	0	0	1	0	0	0	0	1	0	1	0	0	1	0	0	0	0
HisG	1	1	0	1	1	1	1	1	1	1	1	1	1	1	1	1	1	1	1	1	0	0	1	1	1	1	1	1	1	1	1	0	0	0	1	0	1	1	0	1	0	1	0	0	1	0	0	0	0
HisH	1	1	0	1	1	1	1	1	1	1	1	1	1	1	1	1	1	1	1	0	1	1	1	1	1	1	1	1	1	1	1	0	0	0	1	0	0	0	1	1	0	0	0	0	1	0	0	0	0
HisF	1	1	0	1	1	0	1	1	1	1	1	1	1	1	1	1	1	1	1	0	1	1	1	1	1	1	1	1	1	1	1	0	0	0	0	0	0	0	1	1	0	0	0	0	1	0	0	0	0
HisD	0	0	0	0	0	0	0	1	1	1	1	1	1	1	1	1	0	1	1	0	0	0	0	0	0	1	1	0	0	0	0	0	0	0	0	0	1	1	0	1	0	0	0	0	0	0	0	0	0
ArgA	0	0	0	1	1	1	1	1	1	0	0	1	1	1	1	0	1	1	1	1	0	0	0	0	0	0	0	0	0	0	0	0	0	0	0	0	0	0	1	0	0	0	0	0	0	0	0	0	0
ArgB	1	1	0	1	1	1	1	1	1	1	1	1	1	1	1	1	1	1	1	1	0	0	0	0	0	1	1	1	1	1	1	0	0	0	0	0	0	0	0	0	0	1	1	0	0	0	0	0	0
ArgC	1	1	0	1	1	1	1	1	1	1	1	1	1	1	1	1	1	1	1	1	0	0	0	1	1	1	1	1	1	1	1	0	0	0	1	0	1	1	0	1	0	1	1	0	1	0	0	0	0
ArgH	0	0	0	0	0	0	0	1	1	0	0	1	1	0	0	0	1	1	1	1	0	0	0	0	0	0	0	0	0	0	0	0	0	0	0	0	1	1	0	0	0	0	0	0	0	0	0	0	0
TrpE	0	0	0	0	0	0	0	0	0	0	0	0	0	1	1	0	0	0	0	0	1	1	1	1	1	1	1	1	0	0	0	0	0	0	0	0	0	0	0	0	0	0	0	0	0	0	0	0	0
PabB	0	0	0	0	0	0	0	0	0	0	0	0	0	1	1	0	0	0	0	0	1	1	1	1	1	1	1	1	0	0	0	0	0	0	0	0	0	0	0	0	0	0	0	0	0	0	0	0	0
PabA	0	0	0	0	0	0	0	0	0	1	1	1	1	1	1	0	0	0	0	0	1	1	1	1	1	1	1	1	0	0	0	0	0	0	0	0	0	0	0	0	0	0	0	0	0	0	0	0	0
TrpD	0	0	0	0	0	0	1	1	1	1	1	1	1	1	1	0	0	0	1	0	1	1	1	1	1	1	1	1	0	0	0	0	0	0	0	0	0	0	0	0	0	0	0	0	0	0	0	0	0
YbiB	0	0	0	1	1	0	0	1	1	1	1	1	1	1	1	0	0	0	1	0	1	1	1	1	1	1	1	1	0	0	0	0	0	0	0	0	0	0	0	0	0	0	0	0	0	0	0	0	0
TrpF	0	0	0	1	1	1	1	1	1	1	1	1	1	1	1	1	0	1	1	0	1	1	1	1	1	1	1	1	0	0	0	0	0	0	0	0	0	0	0	0	0	0	0	0	0	0	0	0	0
TrpA	0	0	0	1	1	1	1	1	1	1	1	1	1	1	1	1	0	1	1	0	1	1	1	1	1	1	1	1	0	0	0	0	0	0	0	0	0	0	0	0	0	0	0	0	0	0	0	0	0
TrpB	1	1	0	1	1	0	0	1	1	1	1	1	1	1	1	0	0	1	1	0	1	1	1	1	1	1	1	1	0	0	0	0	0	0	0	0	0	0	0	0	0	0	0	0	0	0	0	0	0
ArgD	0	0	0	0	0	0	0	0	0	0	0	1	1	1	1	0	0	1	1	0	0	0	0	0	0	0	0	0	1	1	1	0	0	0	0	0	0	0	0	0	0	0	0	0	0	0	0	0	0
PatA	0	0	0	0	0	0	0	0	0	0	0	1	1	1	1	0	0	1	1	0	0	0	0	0	0	0	0	0	1	1	1	0	0	0	0	0	0	0	0	0	0	0	0	0	0	0	0	0	0
ArGM	0	0	0	0	0	0	0	0	0	0	0	1	1	1	1	0	0	1	1	0	0	0	0	0	0	0	0	0	1	1	1	0	0	0	0	0	0	0	0	0	0	0	0	0	0	0	0	0	0
ThiS	0	0	0	0	0	0	0	0	0	0	0	0	0	0	0	0	0	0	0	0	0	0	0	0	0	0	0	0	0	0	0	1	1	1	0	0	0	0	0	0	0	0	0	0	0	0	0	0	0
ThiG	0	0	0	0	0	0	0	0	0	0	0	0	0	0	0	0	0	0	0	0	0	0	0	0	0	0	0	0	0	0	0	1	1	1	0	0	0	0	0	0	0	0	0	0	0	0	0	0	0
ThiE	0	0	0	0	0	0	0	0	0	0	0	0	0	0	0	0	0	0	0	0	0	0	0	0	0	0	0	0	0	0	0	1	1	1	0	0	0	0	0	0	0	0	0	0	0	0	0	0	0
ThrB	1	1	1	0	0	0	0	1	0	1	0	1	1	1	0	0	0	0	1	0	0	0	0	0	0	0	0	0	0	0	0	0	0	0	1	0	1	1	0	0	0	0	0	0	0	0	0	0	0
ThrC	1	1	0	0	0	0	0	1	1	0	0	0	0	0	0	0	0	0	0	0	0	0	0	0	0	0	0	0	0	0	0	0	0	0	0	1	0	0	0	0	0	0	0	0	0	0	0	0	0
LeuB	0	0	0	0	0	1	1	1	1	0	0	0	1	0	0	1	0	0	1	1	0	0	0	0	0	0	0	0	0	0	0	0	0	0	1	0	1	1	0	0	0	0	0	0	0	0	0	0	0
DmlA	0	0	0	0	0	1	1	1	1	0	0	0	1	0	0	1	0	0	1	1	0	0	0	0	0	0	0	0	0	0	0	0	0	0	1	0	1	1	0	0	0	0	0	0	0	0	0	0	0
CarB	1	1	0	0	0	0	0	0	0	1	0	0	0	1	1	0	1	0	0	0	0	0	0	0	0	0	0	0	0	0	0	0	0	0	0	0	0	0	1	1	1	0	0	0	0	0	0	0	0
CarA	0	0	0	0	0	0	0	0	1	1	0	1	1	1	1	1	0	0	1	0	0	0	0	0	0	0	0	0	0	0	0	0	0	0	0	0	0	0	1	1	0	0	0	0	0	0	0	0	0
GltB	0	0	0	0	0	0	0	0	1	0	0	0	0	0	0	0	0	0	0	0	0	0	0	0	0	0	0	0	0	0	0	0	0	0	0	0	0	0	1	0	1	0	0	0	0	0	0	0	0
ProA	0	0	0	0	0	1	1	1	1	0	0	1	1	0	0	0	0	1	1	0	0	0	0	0	0	0	0	0	0	0	0	0	0	0	0	0	0	0	0	0	0	1	1	0	0	0	0	0	0
ProB	0	0	0	0	0	0	0	1	1	0	0	0	0	0	0	0	0	1	1	0	0	0	0	0	0	0	0	0	0	0	0	0	0	0	0	0	0	0	0	0	0	1	1	1	0	0	0	0	0
ProC	0	0	0	0	0	0	0	0	0	0	0	0	0	0	0	0	0	0	0	0	0	0	0	0	0	0	0	0	0	0	0	0	0	0	0	0	0	0	0	0	0	0	1	1	0	0	0	0	0
MetA	1	1	0	0	0	0	0	1	1	0	0	1	1	1	1	0	0	0	1	0	0	0	0	0	0	0	0	0	0	0	0	0	0	0	0	0	0	0	0	0	0	0	0	0	1	0	0	0	0
DapB	0	0	0	0	0	0	0	0	0	0	0	0	0	0	0	0	0	0	0	0	0	0	0	0	0	0	0	0	0	0	0	0	0	0	0	0	0	0	0	0	0	0	0	0	0	1	0	0	0
FolK	0	0	0	0	0	0	0	0	0	0	0	0	0	0	0	0	0	0	0	0	0	0	0	0	0	0	0	0	0	0	0	0	0	0	0	0	0	0	0	0	0	0	0	0	0	0	1	0	0
AroB	0	0	0	0	0	0	0	0	0	0	0	0	0	0	0	0	0	0	0	0	0	0	0	0	0	0	0	0	0	0	0	0	0	0	0	0	0	0	0	0	0	0	0	0	0	0	0	1	1
AroC	0	0	0	0	0	0	0	0	0	0	0	0	0	0	0	0	0	0	0	0	0	0	0	0	0	0	0	0	0	0	0	0	0	0	0	0	0	0	0	0	0	0	0	0	0	0	0	1	1
IspE	0	0	0	0	0	0	0	0	0	0	0	0	0	0	0	0	0	0	0	0	0	0	0	0	0	0	0	0	0	0	0	0	0	0	0	0	0	0	0	0	0	0	0	0	0	0	0	0	0
CoaBC	0	0	0	0	0	0	0	0	0	0	0	0	0	0	0	0	0	0	0	0	0	0	0	0	0	0	0	0	0	0	0	0	0	0	0	0	0	0	0	0	0	0	0	0	0	0	0	0	0
PurD	0	0	1	0	0	0	0	0	0	0	0	0	0	0	0	0	0	0	0	0	0	0	0	0	0	0	0	0	0	0	0	0	0	0	0	0	0	0	0	0	0	0	0	0	0	0	0	0	0
PurM	0	0	0	0	0	0	0	0	0	0	0	0	0	0	0	0	0	0	0	0	0	0	0	0	0	0	0	0	0	0	0	0	0	0	0	0	0	0	0	1	0	0	0	0	0	0	1	0	1
PurE	0	0	0	0	0	0	0	0	0	0	0	0	0	0	0	0	0	0	0	0	0	0	0	0	0	0	0	0	0	0	0	0	0	0	0	0	0	0	0	1	0	0	0	0	0	0	0	0	1
PurC	0	0	0	0	0	0	0	0	0	0	0	0	0	0	0	0	0	0	0	0	0	0	0	0	0	0	0	0	0	0	0	0	0	0	0	0	0	0	0	0	0	0	0	0	0	0	0	0	0
PurH	0	0	0	0	0	0	0	0	0	0	0	0	0	0	0	0	0	0	0	0	0	0	0	0	0	0	0	0	0	0	0	0	0	0	0	0	0	0	0	0	0	0	0	0	0	0	0	0	0
PurF	0	0	0	0	0	0	0	0	0	0	0	0	0	0	0	0	0	0	0	0	0	0	0	0	0	0	0	0	0	0	0	0	0	0	0	0	0	0	1	1	0	0	0	0	0	0	0	0	0
PyrF	0	0	0	0	0	0	0	0	0	0	0	0	0	0	0	0	0	0	0	0	0	0	0	0	0	0	0	0	0	0	0	0	0	0	0	0	0	0	0	0	0	0	0	0	0	0	0	0	0
PyrE	0	0	0	0	0	0	0	0	0	0	0	0	0	0	0	0	0	0	0	0	0	0	0	0	0	0	0	0	0	0	0	0	0	0	0	0	0	0	0	0	0	0	0	0	0	0	0	0	0
TyrA	0	0	0	0	0	0	0	1	0	0	0	0	0	0	0	0	0	0	1	0	0	0	0	0	0	0	0	0	0	0	0	0	0	0	0	0	0	0	0	0	0	0	0	0	0	0	0	0	0
PheA	0	0	0	0	0	0	0	1	1	0	0	1	1	1	1	0	0	1	1	0	1	1	0	1	0	1	1	0	0	0	0	0	0	0	0	0	0	0	0	0	0	0	0	0	0	0	0	0	1
LeuA	0	0	0	0	0	1	1	0	0	0	0	0	0	0	0	0	0	0	0	0	0	0	0	0	0	0	0	0	0	0	0	0	0	0	0	0	0	0	0	0	0	0	0	0	0	0	0	0	0
MhpE	0	0	0	0	0	1	1	0	0	0	0	0	0	0	0	0	0	0	0	0	0	0	0	0	0	0	0	0	0	0	0	0	0	0	0	0	0	0	0	0	0	0	0	0	0	0	0	0	0
GlnB	0	0	0	0	0	0	0	0	0	0	0	0	0	0	0	0	0	0	0	0	0	0	0	0	0	0	0	0	0	0	0	0	0	0	0	0	0	0	0	0	0	0	0	0	0	0	0	0	0
GlnK	0	0	0	0	0	0	0	0	0	0	0	0	0	0	0	0	0	0	0	0	0	0	0	0	0	0	0	0	0	0	0	0	0	0	0	0	0	0	0	0	0	0	0	0	0	0	0	0	0
AmtB	0	0	0	0	0	0	0	0	0	0	0	0	0	0	0	0	0	0	0	0	0	0	0	0	0	0	0	0	0	0	0	0	0	0	0	0	0	0	0	0	0	0	0	0	0	0	0	0	0
ArgI	0	0	0	0	0	0	0	0	0	0	0	0	0	0	0	0	0	0	0	0	0	0	0	0	0	0	0	0	0	0	0	0	0	0	0	0	0	0	0	0	0	0	0	0	0	0	0	0	0
ArgF	0	0	0	0	0	0	0	0	0	0	0	0	0	0	0	0	0	0	0	0	0	0	0	0	0	0	0	0	0	0	0	0	0	0	0	0	0	0	0	0	0	0	0	0	0	0	0	0	0
YgeW	0	0	0	0	0	0	0	0	0	0	0	0	0	0	0	0	0	0	0	0	0	0	0	0	0	0	0	0	0	0	0	0	0	0	0	0	0	0	0	0	0	0	0	0	0	0	0	0	0
MoaC	0	0	0	0	0	0	0	0	0	0	0	0	0	0	0	0	0	0	0	0	0	0	0	0	0	0	0	0	0	0	0	0	0	0	0	0	0	0	0	0	0	0	0	0	0	0	0	0	0
MoaE	0	0	0	0	0	0	0	0	0	0	0	0	0	0	0	0	0	0	0	0	0	0	0	0	0	0	0	0	0	0	0	0	0	0	0	0	0	0	0	0	0	0	0	0	0	0	0	0	0
AsnA	0	0	0	0	0	0	0	0	0	0	0	0	0	0	0	0	0	0	0	0	0	0	0	0	0	0	0	0	0	0	0	0	0	0	0	0	0	0	0	0	0	0	0	0	0	0	0	0	0
TnaA	0	0	0	0	0	0	0	0	0	0	0	0	0	0	0	0	0	0	0	0	0	0	0	0	0	0	0	0	0	0	0	0	0	0	0	0	0	0	0	0	0	0	0	0	0	0	0	0	0
YhaM	0	0	0	0	0	0	0	0	0	0	0	0	0	0	0	0	0	0	0	0	0	0	0	0	0	0	0	0	0	0	0	0	0	0	0	0	0	0	0	0	0	0	0	0	0	0	0	0	0
RpiA	0	0	0	0	0	0	0	0	0	0	0	0	0	0	0	0	0	0	0	0	0	0	0	0	0	0	0	0	0	0	0	0	0	0	0	0	0	0	0	0	0	0	0	0	0	0	0	0	0
PaxA	0	0	0	0	0	0	0	0	0	0	0	0	0	0	0	0	0	0	0	0	0	0	0	0	0	0	0	0	0	0	0	0	0	0	0	0	0	0	0	0	0	0	0	0	0	0	0	0	0
MetF	0	0	0	0	0	0	0	0	0	0	0	0	0	0	0	0	0	0	0	0	0	0	0	0	0	0	0	0	0	0	0	0	0	0	0	0	0	0	0	0	0	0	0	0	0	0	0	0	0
DeoA	0	0	0	0	0	0	0	0	0	0	0	0	0	0	0	0	0	0	0	0	0	0	0	0	0	0	0	0	0	0	0	0	0	0	0	0	0	0	0	0	0	0	0	0	0	0	0	0	0
Cdd	0	0	0	0	0	0	0	0	0	0	0	0	0	0	0	0	0	0	0	0	0	0	0	0	0	0	0	0	0	0	0	0	0	0	0	0	0	0	0	0	0	0	0	0	0	0	0	0	0
LuxS	0	0	0	0	0	0	0	1	0	0	0	0	0	0	0	0	0	0	0	0	0	0	0	0	0	0	0	1	0	0	0	0	0	0	1	0	0	0	0	0	0	0	0	0	0	0	0	0	0
YjiT	0	0	0	0	0	0	0	0	0	0	0	0	0	0	0	0	0	0	0	0	0	0	0	0	0	0	0	0	0	0	0	0	0	0	0	0	0	0	0	0	0	0	0	0	0	0	0	0	0
YnaA	0	0	0	0	0	0	0	0	0	0	0	0	0	0	0	0	0	0	0	0	0	0	0	0	0	0	0	0	0	0	0	0	0	0	0	0	0	0	0	0	0	0	0	0	0	0	0	0	0
GltA	0	0	0	0	0	0	0	0	0	0	0	0	0	0	0	0	0	0	0	0	0	0	0	0	0	0	0	0	0	0	0	0	0	0	0	0	0	0	0	0	0	0	0	0	0	0	0	0	0
PrpC	0	0	0	0	0	0	0	0	0	0	0	0	0	0	0	0	0	0	0	0	0	0	0	0	0	0	0	0	0	0	0	0	0	0	0	0	0	0	0	0	0	0	0	0	0	0	0	0	0
CysK	0	0	0	0	0	0	0	0	0	0	0	0	0	0	0	0	0	0	0	0	0	0	0	0	0	0	0	0	0	0	0	0	0	0	0	0	0	0	0	0	0	0	0	0	0	0	0	0	0
CysM	0	0	0	0	0	0	0	0	0	0	0	0	0	0	0	0	0	0	0	0	0	0	0	0	0	0	0	0	0	0	0	0	0	0	0	0	0	0	0	0	0	0	0	0	0	0	0	0	0
YdiB	0	0	0	0	0	0	0	0	0	0	0	0	0	0	0	0	0	0	0	0	0	0	0	0	0	0	0	0	0	0	0	0	0	0	0	0	0	0	0	0	0	0	0	0	0	0	0	0	0
AroE	0	0	0	0	0	0	0	0	0	0	0	0	0	0	0	0	0	0	0	0	0	0	0	0	0	0	0	0	0	0	0	0	0	0	0	0	0	0	0	0	0	0	0	0	0	0	0	0	0
PykF	0	0	0	0	0	0	0	0	0	0	0	0	0	0	0	0	0	0	0	0	0	0	0	0	0	0	0	0	0	0	0	0	0	0	0	0	0	0	0	0	0	0	0	0	0	0	0	0	0
PykA	0	0	0	0	0	0	0	0	0	0	0	0	0	0	0	0	0	0	0	0	0	0	0	0	0	0	0	0	0	0	0	0	0	0	0	0	0	0	0	0	0	0	0	0	0	0	0	0	0
GldA	0	0	0	0	0	0	0	0	0	0	0	0	0	0	0	0	0	0	0	0	0	0	0	0	0	0	0	0	0	0	0	0	0	0	0	0	0	0	0	0	0	0	0	0	0	0	0	0	0
HcxA	0	0	0	0	0	0	0	0	0	0	0	0	0	0	0	0	0	0	0	0	0	0	0	0	0	0	0	0	0	0	0	0	0	0	0	0	0	0	0	0	0	0	0	0	0	0	0	0	0
PheT	0	0	0	0	0	0	0	0	0	0	0	0	0	0	0	0	0	0	0	0	0	0	0	0	0	0	0	0	0	0	0	0	0	0	0	0	0	0	0	0	1	0	0	0	0	0	0	0	0
UvrB	0	0	0	0	0	0	0	0	0	0	0	0	0	0	0	0	0	0	0	0	0	0	0	0	0	0	0	0	0	0	0	0	0	0	0	0	0	0	0	0	1	0	0	0	0	0	0	0	0
LepA	0	0	0	0	0	0	0	0	0	0	0	0	0	0	0	0	0	0	0	0	0	0	0	0	0	0	0	0	0	0	0	0	0	0	0	0	0	0	0	0	0	0	0	0	0	0	0	0	0
PheS	0	0	0	0	0	0	0	0	0	0	0	0	0	0	0	0	0	0	0	0	0	0	0	0	0	0	0	0	0	0	0	0	0	0	0	0	0	0	0	0	0	0	0	0	0	0	0	0	0
ObgE	0	0	0	0	0	0	0	0	0	0	0	0	0	0	0	0	0	0	0	0	0	0	0	0	0	0	0	0	0	0	0	0	0	0	0	0	0	0	0	0	0	0	0	0	0	0	0	0	0
RpsB	0	0	0	0	0	0	0	0	0	0	0	0	0	0	0	0	0	0	0	0	0	0	0	0	0	0	0	0	0	0	0	0	0	0	0	0	0	0	0	0	0	0	0	0	0	0	0	0	0
TyrS	0	0	0	0	0	0	0	0	0	0	0	0	0	0	0	0	0	0	0	0	0	0	0	0	0	0	0	0	0	0	0	0	0	0	0	0	0	0	0	0	0	0	0	0	0	0	0	0	0
ThrS	0	0	0	0	0	0	0	0	0	0	0	0	0	0	0	0	0	0	0	0	0	0	0	0	0	0	0	0	0	0	0	0	0	0	0	0	0	0	0	0	0	0	0	0	0	0	0	0	0
Pgk	0	0	0	0	0	0	0	0	0	0	0	0	0	0	0	0	0	0	0	0	0	0	0	0	0	0	0	0	0	0	0	0	0	0	0	0	0	0	0	0	0	0	0	0	0	0	0	0	0
ArgS	0	0	0	0	0	0	0	0	0	0	0	0	0	0	0	0	0	0	0	0	0	0	0	0	0	0	0	0	0	0	0	0	0	0	0	0	0	0	0	0	0	0	0	0	0	0	0	0	0
SecY	0	0	0	0	0	0	0	0	0	0	0	0	0	0	0	0	0	0	0	0	0	0	0	0	0	0	0	0	0	0	0	0	0	0	0	0	0	0	0	0	0	0	0	0	0	0	0	0	0
GyrB	0	0	0	0	0	0	0	0	0	0	0	0	0	0	0	0	0	0	0	0	0	0	0	0	0	0	0	0	0	0	0	0	0	0	0	0	0	0	0	0	0	0	0	0	0	0	0	0	0
ParE	0	0	0	0	0	0	0	0	0	0	0	0	0	0	0	0	0	0	0	0	0	0	0	0	0	0	0	0	0	0	0	0	0	0	0	0	0	0	0	0	0	0	0	0	0	0	0	0	0
RuvA	0	0	0	0	0	0	0	0	0	0	0	0	0	0	0	0	0	0	0	0	0	0	0	0	0	0	0	0	0	0	0	0	0	0	0	0	0	0	0	0	0	0	0	0	0	0	0	0	0
RuvB	0	0	0	0	0	0	0	0	0	0	0	0	0	0	0	0	0	0	0	0	0	0	0	0	0	0	0	0	0	0	0	0	0	0	0	0	0	0	0	0	0	0	0	0	0	0	0	0	0
TruB	0	0	0	0	0	0	0	0	0	0	0	0	0	0	0	0	0	0	0	0	0	0	0	0	0	0	0	0	0	0	0	0	0	0	0	0	0	0	0	0	0	0	0	0	0	0	0	0	0
YeaZ	0	0	0	0	0	0	0	0	0	0	0	0	0	0	0	0	0	0	0	0	0	0	0	0	0	0	0	0	0	0	0	0	0	0	0	0	0	0	0	0	0	0	0	0	0	0	0	0	0
TrmD	0	0	0	0	0	0	0	0	0	0	0	0	0	0	0	0	0	0	0	0	0	0	0	0	0	0	0	0	0	0	0	0	0	0	0	0	0	0	0	0	0	0	0	0	0	0	0	0	0
HolA	0	0	0	0	0	0	0	0	0	0	0	0	0	0	0	0	0	0	0	0	0	0	0	0	0	0	0	0	0	0	0	0	0	0	0	0	0	0	0	0	0	0	0	0	0	0	0	0	0
Ffh	0	0	0	0	0	0	0	0	0	0	0	0	0	0	0	0	0	0	0	0	0	0	0	0	0	0	0	0	0	0	0	0	0	0	0	0	0	0	0	0	0	0	0	0	0	0	0	0	0
YchF	0	0	0	0	0	0	0	0	0	0	0	0	0	0	0	0	0	0	0	0	0	0	0	0	0	0	0	0	0	0	0	0	0	0	0	0	0	0	0	0	0	0	0	0	0	0	0	0	0
RnhB	0	0	0	0	0	0	0	0	0	0	0	0	0	0	0	0	0	0	0	0	0	0	0	0	0	0	0	0	0	0	0	0	0	0	0	0	0	0	0	0	0	0	0	0	0	0	0	0	0
ycaI	0	0	0	0	0	0	0	0	0	0	0	0	0	0	0	0	0	0	0	0	0	0	0	0	0	0	0	0	0	0	0	0	0	0	0	0	0	0	0	0	0	0	0	0	0	0	0	0	0
EngB	0	0	0	0	0	0	0	0	0	0	0	0	0	0	0	0	0	0	0	0	0	0	0	0	0	0	0	0	0	0	0	0	0	0	0	0	0	0	0	0	0	0	0	0	0	0	0	0	0
RplT	0	0	0	0	0	0	0	0	0	0	0	0	0	0	0	0	0	0	0	0	0	0	0	0	0	0	0	0	0	0	0	0	0	0	0	0	0	0	0	0	0	0	0	0	0	0	0	0	0
RnpA	0	0	0	0	0	0	0	0	0	0	0	0	0	0	0	0	0	0	0	0	0	0	0	0	0	0	0	0	0	0	0	0	0	0	0	0	0	0	0	0	0	0	0	0	0	0	0	0	0
AlaA	0	0	0	0	0	0	0	0	0	0	0	0	0	0	0	0	0	0	0	0	0	0	0	0	0	0	0	0	0	0	0	0	0	0	0	0	0	0	0	0	0	0	0	0	0	0	0	0	0
AlaC	0	0	0	0	0	0	0	0	0	0	0	0	0	0	0	0	0	0	0	0	0	0	0	0	0	0	0	0	0	0	0	0	0	0	0	0	0	0	0	0	0	0	0	0	0	0	0	0	0
YbdL	0	0	0	0	0	0	0	0	0	0	0	0	0	0	0	0	0	0	0	0	0	0	0	0	0	0	0	0	0	0	0	0	0	0	0	0	0	0	0	0	0	0	0	0	0	0	0	0	0
TalA	0	0	0	0	0	0	0	0	0	0	0	0	0	0	0	0	0	0	0	0	0	0	0	0	0	0	0	0	0	0	0	0	0	0	0	0	0	0	0	0	0	0	0	0	0	0	0	0	0
TalC	0	0	0	0	0	0	0	0	0	0	0	0	0	0	0	0	0	0	0	0	0	0	0	0	0	0	0	0	0	0	0	0	0	0	0	0	0	0	0	0	0	0	0	0	0	0	0	0	0
FsaA	0	0	0	0	0	0	0	0	0	0	0	0	0	0	0	0	0	0	0	0	0	0	0	0	0	0	0	0	0	0	0	0	0	0	0	0	0	0	0	0	0	0	0	0	0	0	0	0	0
TalB	0	0	0	0	0	0	0	0	0	0	0	0	0	0	0	0	0	0	0	0	0	0	0	0	0	0	0	0	0	0	0	0	0	0	0	0	0	0	0	0	0	0	0	0	0	0	0	0	0
YieH	0	0	0	0	0	0	0	0	0	0	0	0	0	0	0	0	0	0	0	0	0	0	0	0	0	0	0	0	0	0	0	0	0	0	0	0	0	0	0	0	0	0	0	0	0	0	0	0	0
YqaB	0	0	0	0	0	0	0	0	0	0	0	0	0	0	0	0	0	0	0	0	0	0	0	0	0	0	0	0	0	0	0	0	0	0	0	0	0	0	0	0	0	0	0	0	0	0	0	0	0
HxpA	0	0	0	0	0	0	0	0	0	0	0	0	0	0	0	0	0	0	0	0	0	0	0	0	0	0	0	0	0	0	0	0	0	0	0	0	0	0	0	0	0	0	0	0	0	0	0	0	0
HxpB	0	0	0	0	0	0	0	0	0	0	0	0	0	0	0	0	0	0	0	0	0	0	0	0	0	0	0	0	0	0	0	0	0	0	0	0	0	0	0	0	0	0	0	0	0	0	0	0	0
PgmB	0	0	0	0	0	0	0	0	0	0	0	0	0	0	0	0	0	0	0	0	0	0	0	0	0	0	0	0	0	0	0	0	0	0	0	0	0	0	0	0	0	0	0	0	0	0	0	0	0
[truncated: 81 more columns]

## Sheet: SD300
	ThrA	MetL	LysC	IlvH	IlvN	LeuC	LeuD	IlvC	ArgG	HisB	HisA	HisI	HisG	HisH	HisF	HisD	ArgA	ArgB	ArgC	ArgH	TrpE	PabB	PabA	TrpD	YbiB	TrpF	TrpA	TrpB	ArgD	PatA	ArGM	ThiS	ThiG	ThiE	ThrB	ThrC	LeuB	DmlA	CarB	CarA	GltB	ProA	ProB	ProC	MetA	DapB	FolK	AroB	AroC
ThrA	1	1	1	0	0	0	0	1	0	0	0	0	0	0	0	0	0	0	0	0	0	0	0	0	0	0	0	0	0	0	0	0	0	0	1	0	0	0	0	0	0	0	0	0	0	0	0	0	0
MetL	1	1	1	0	0	0	0	1	0	0	0	0	0	0	0	0	0	0	0	0	0	0	0	0	0	0	0	0	0	0	0	0	0	0	1	0	0	0	0	0	0	0	0	0	0	0	0	0	0
LysC	1	1	1	0	0	0	0	0	0	0	0	0	0	0	0	0	0	0	0	0	0	0	0	0	0	0	0	0	0	0	0	0	0	0	0	0	0	0	0	0	0	0	0	0	0	0	0	0	0
IlvH	0	0	0	1	1	1	0	1	0	0	0	0	0	0	0	0	0	0	0	0	0	0	0	0	0	0	0	0	0	0	0	0	0	0	0	0	0	0	0	0	0	0	0	0	0	0	0	0	0
IlvN	0	0	0	1	1	1	0	1	0	0	0	0	0	0	0	0	0	0	0	0	0	0	0	0	0	0	0	0	0	0	0	0	0	0	0	0	0	0	0	0	0	0	0	0	0	0	0	0	0
LeuC	0	0	0	1	1	1	1	0	0	0	0	0	0	0	0	0	0	0	0	0	0	0	0	0	0	0	0	0	0	0	0	0	0	0	0	0	0	0	0	0	0	0	0	0	0	0	0	0	0
LeuD	0	0	0	0	0	1	1	0	0	0	0	0	0	0	0	0	0	0	0	0	0	0	0	0	0	0	0	0	0	0	0	0	0	0	0	0	0	0	0	0	0	0	0	0	0	0	0	0	0
IlvC	1	1	0	1	1	0	0	1	1	1	0	0	0	1	0	0	0	0	0	0	0	0	0	0	0	0	0	0	0	0	0	0	0	0	1	0	0	0	0	0	0	0	0	0	0	0	0	0	0
ArgG	0	0	0	0	0	0	0	1	1	1	1	1	1	1	1	0	0	1	1	0	0	0	0	0	0	0	0	0	0	0	0	0	0	0	0	0	0	0	0	0	0	0	0	0	0	0	0	0	0
HisB	0	0	0	0	0	0	0	1	1	1	1	1	1	1	1	1	0	0	0	0	0	0	0	0	0	0	1	1	0	0	0	0	0	0	0	0	0	0	0	0	0	0	0	0	0	0	0	0	0
HisA	0	0	0	0	0	0	0	0	1	1	1	1	1	1	1	1	0	0	0	0	0	0	0	0	0	0	1	1	0	0	0	0	0	0	0	0	0	0	0	0	0	0	0	0	0	0	0	0	0
HisI	0	0	0	0	0	0	0	0	1	1	1	1	1	1	1	1	0	1	1	0	0	0	0	0	0	1	1	1	0	0	0	0	0	0	0	0	0	0	0	0	0	0	0	0	0	0	0	0	0
HisG	0	0	0	0	0	0	0	0	1	1	1	1	1	1	1	1	0	1	1	0	0	0	0	0	0	1	1	1	0	0	0	0	0	0	0	0	0	0	0	0	0	0	0	0	0	0	0	0	0
HisH	0	0	0	0	0	0	0	1	1	1	1	1	1	1	1	1	0	1	1	0	0	0	0	0	0	0	1	1	0	0	0	0	0	0	0	0	0	0	0	0	0	0	0	0	0	0	0	0	0
HisF	0	0	0	0	0	0	0	0	1	1	1	1	1	1	1	1	0	1	1	0	0	0	0	0	0	0	1	1	0	0	0	0	0	0	0	0	0	0	0	0	0	0	0	0	0	0	0	0	0
HisD	0	0	0	0	0	0	0	0	0	1	1	1	1	1	1	1	0	0	0	0	0	0	0	0	0	0	0	0	0	0	0	0	0	0	0	0	0	0	0	0	0	0	0	0	0	0	0	0	0
ArgA	0	0	0	0	0	0	0	0	0	0	0	0	0	0	0	0	1	1	1	0	0	0	0	0	0	0	0	0	0	0	0	0	0	0	0	0	0	0	0	0	0	0	0	0	0	0	0	0	0
ArgB	0	0	0	0	0	0	0	0	1	0	0	1	1	1	1	0	1	1	1	0	0	0	0	0	0	0	0	0	0	0	0	0	0	0	0	0	0	0	0	0	0	0	0	0	0	0	0	0	0
ArgC	0	0	0	0	0	0	0	0	1	0	0	1	1	1	1	0	1	1	1	0	0	0	0	0	0	0	0	0	0	0	0	0	0	0	0	0	0	0	0	0	0	0	0	0	0	0	0	0	0
ArgH	0	0	0	0	0	0	0	0	0	0	0	0	0	0	0	0	0	0	0	1	0	0	0	0	0	0	0	0	0	0	0	0	0	0	0	0	0	0	0	0	0	0	0	0	0	0	0	0	0
TrpE	0	0	0	0	0	0	0	0	0	0	0	0	0	0	0	0	0	0	0	0	1	1	1	1	1	1	1	1	0	0	0	0	0	0	0	0	0	0	0	0	0	0	0	0	0	0	0	0	0
PabB	0	0	0	0	0	0	0	0	0	0	0	0	0	0	0	0	0	0	0	0	1	1	1	1	1	1	1	1	0	0	0	0	0	0	0	0	0	0	0	0	0	0	0	0	0	0	0	0	0
PabA	0	0	0	0	0	0	0	0	0	0	0	0	0	0	0	0	0	0	0	0	1	1	1	1	0	1	1	0	0	0	0	0	0	0	0	0	0	0	0	0	0	0	0	0	0	0	0	0	0
TrpD	0	0	0	0	0	0	0	0	0	0	0	0	0	0	0	0	0	0	0	0	1	1	1	1	1	1	1	1	0	0	0	0	0	0	0	0	0	0	0	0	0	0	0	0	0	0	0	0	0
YbiB	0	0	0	0	0	0	0	0	0	0	0	0	0	0	0	0	0	0	0	0	1	1	0	1	1	1	1	1	0	0	0	0	0	0	0	0	0	0	0	0	0	0	0	0	0	0	0	0	0
TrpF	0	0	0	0	0	0	0	0	0	0	0	1	1	0	0	0	0	0	0	0	1	1	1	1	1	1	1	1	0	0	0	0	0	0	0	0	0	0	0	0	0	0	0	0	0	0	0	0	0
TrpA	0	0	0	0	0	0	0	0	0	1	1	1	1	1	1	0	0	0	0	0	1	1	1	1	1	1	1	1	0	0	0	0	0	0	0	0	0	0	0	0	0	0	0	0	0	0	0	0	0
TrpB	0	0	0	0	0	0	0	0	0	1	1	1	1	1	1	0	0	0	0	0	1	1	0	1	1	1	1	1	0	0	0	0	0	0	0	0	0	0	0	0	0	0	0	0	0	0	0	0	0
ArgD	0	0	0	0	0	0	0	0	0	0	0	0	0	0	0	0	0	0	0	0	0	0	0	0	0	0	0	0	1	1	1	0	0	0	0	0	0	0	0	0	0	0	0	0	0	0	0	0	0
PatA	0	0	0	0	0	0	0	0	0	0	0	0	0	0	0	0	0	0	0	0	0	0	0	0	0	0	0	0	1	1	1	0	0	0	0	0	0	0	0	0	0	0	0	0	0	0	0	0	0
ArGM	0	0	0	0	0	0	0	0	0	0	0	0	0	0	0	0	0	0	0	0	0	0	0	0	0	0	0	0	1	1	1	0	0	0	0	0	0	0	0	0	0	0	0	0	0	0	0	0	0
ThiS	0	0	0	0	0	0	0	0	0	0	0	0	0	0	0	0	0	0	0	0	0	0	0	0	0	0	0	0	0	0	0	1	1	1	0	0	0	0	0	0	0	0	0	0	0	0	0	0	0
ThiG	0	0	0	0	0	0	0	0	0	0	0	0	0	0	0	0	0	0	0	0	0	0	0	0	0	0	0	0	0	0	0	1	1	1	0	0	0	0	0	0	0	0	0	0	0	0	0	0	0
ThiE	0	0	0	0	0	0	0	0	0	0	0	0	0	0	0	0	0	0	0	0	0	0	0	0	0	0	0	0	0	0	0	1	1	1	0	0	0	0	0	0	0	0	0	0	0	0	0	0	0
ThrB	1	1	0	0	0	0	0	1	0	0	0	0	0	0	0	0	0	0	0	0	0	0	0	0	0	0	0	0	0	0	0	0	0	0	1	0	0	0	0	0	0	0	0	0	0	0	0	0	0
ThrC	0	0	0	0	0	0	0	0	0	0	0	0	0	0	0	0	0	0	0	0	0	0	0	0	0	0	0	0	0	0	0	0	0	0	0	1	0	0	0	0	0	0	0	0	0	0	0	0	0
LeuB	0	0	0	0	0	0	0	0	0	0	0	0	0	0	0	0	0	0	0	0	0	0	0	0	0	0	0	0	0	0	0	0	0	0	0	0	1	1	0	0	0	0	0	0	0	0	0	0	0
DmlA	0	0	0	0	0	0	0	0	0	0	0	0	0	0	0	0	0	0	0	0	0	0	0	0	0	0	0	0	0	0	0	0	0	0	0	0	1	1	0	0	0	0	0	0	0	0	0	0	0
CarB	0	0	0	0	0	0	0	0	0	0	0	0	0	0	0	0	0	0	0	0	0	0	0	0	0	0	0	0	0	0	0	0	0	0	0	0	0	0	1	1	0	0	0	0	0	0	0	0	0
CarA	0	0	0	0	0	0	0	0	0	0	0	0	0	0	0	0	0	0	0	0	0	0	0	0	0	0	0	0	0	0	0	0	0	0	0	0	0	0	1	1	0	0	0	0	0	0	0	0	0
GltB	0	0	0	0	0	0	0	0	0	0	0	0	0	0	0	0	0	0	0	0	0	0	0	0	0	0	0	0	0	0	0	0	0	0	0	0	0	0	0	0	1	0	0	0	0	0	0	0	0
ProA	0	0	0	0	0	0	0	0	0	0	0	0	0	0	0	0	0	0	0	0	0	0	0	0	0	0	0	0	0	0	0	0	0	0	0	0	0	0	0	0	0	1	1	0	0	0	0	0	0
ProB	0	0	0	0	0	0	0	0	0	0	0	0	0	0	0	0	0	0	0	0	0	0	0	0	0	0	0	0	0	0	0	0	0	0	0	0	0	0	0	0	0	1	1	0	0	0	0	0	0
ProC	0	0	0	0	0	0	0	0	0	0	0	0	0	0	0	0	0	0	0	0	0	0	0	0	0	0	0	0	0	0	0	0	0	0	0	0	0	0	0	0	0	0	0	1	0	0	0	0	0
MetA	0	0	0	0	0	0	0	0	0	0	0	0	0	0	0	0	0	0	0	0	0	0	0	0	0	0	0	0	0	0	0	0	0	0	0	0	0	0	0	0	0	0	0	0	1	0	0	0	0
DapB	0	0	0	0	0	0	0	0	0	0	0	0	0	0	0	0	0	0	0	0	0	0	0	0	0	0	0	0	0	0	0	0	0	0	0	0	0	0	0	0	0	0	0	0	0	1	0	0	0
FolK	0	0	0	0	0	0	0	0	0	0	0	0	0	0	0	0	0	0	0	0	0	0	0	0	0	0	0	0	0	0	0	0	0	0	0	0	0	0	0	0	0	0	0	0	0	0	1	0	0
AroB	0	0	0	0	0	0	0	0	0	0	0	0	0	0	0	0	0	0	0	0	0	0	0	0	0	0	0	0	0	0	0	0	0	0	0	0	0	0	0	0	0	0	0	0	0	0	0	1	0
AroC	0	0	0	0	0	0	0	0	0	0	0	0	0	0	0	0	0	0	0	0	0	0	0	0	0	0	0	0	0	0	0	0	0	0	0	0	0	0	0	0	0	0	0	0	0	0	0	0	1
IspE	0	0	0	0	0	0	0	0	0	0	0	0	0	0	0	0	0	0	0	0	0	0	0	0	0	0	0	0	0	0	0	0	0	0	0	0	0	0	0	0	0	0	0	0	0	0	0	0	0
CoaBC	0	0	0	0	0	0	0	0	0	0	0	0	0	0	0	0	0	0	0	0	0	0	0	0	0	0	0	0	0	0	0	0	0	0	0	0	0	0	0	0	0	0	0	0	0	0	0	0	0
PurD	0	0	0	0	0	0	0	0	0	0	0	0	0	0	0	0	0	0	0	0	0	0	0	0	0	0	0	0	0	0	0	0	0	0	0	0	0	0	0	0	0	0	0	0	0	0	0	0	0
PurM	0	0	0	0	0	0	0	0	0	0	0	0	0	0	0	0	0	0	0	0	0	0	0	0	0	0	0	0	0	0	0	0	0	0	0	0	0	0	0	0	0	0	0	0	0	0	0	0	0
PurE	0	0	0	0	0	0	0	0	0	0	0	0	0	0	0	0	0	0	0	0	0	0	0	0	0	0	0	0	0	0	0	0	0	0	0	0	0	0	0	0	0	0	0	0	0	0	0	0	0
PurC	0	0	0	0	0	0	0	0	0	0	0	0	0	0	0	0	0	0	0	0	0	0	0	0	0	0	0	0	0	0	0	0	0	0	0	0	0	0	0	0	0	0	0	0	0	0	0	0	0
PurH	0	0	0	0	0	0	0	0	0	0	0	0	0	0	0	0	0	0	0	0	0	0	0	0	0	0	0	0	0	0	0	0	0	0	0	0	0	0	0	0	0	0	0	0	0	0	0	0	0
PurF	0	0	0	0	0	0	0	0	0	0	0	0	0	0	0	0	0	0	0	0	0	0	0	0	0	0	0	0	0	0	0	0	0	0	0	0	0	0	0	0	0	0	0	0	0	0	0	0	0
PyrF	0	0	0	0	0	0	0	0	0	0	0	0	0	0	0	0	0	0	0	0	0	0	0	0	0	0	0	0	0	0	0	0	0	0	0	0	0	0	0	0	0	0	0	0	0	0	0	0	0
PyrE	0	0	0	0	0	0	0	0	0	0	0	0	0	0	0	0	0	0	0	0	0	0	0	0	0	0	0	0	0	0	0	0	0	0	0	0	0	0	0	0	0	0	0	0	0	0	0	0	0
TyrA	0	0	0	0	0	0	0	0	0	0	0	0	0	0	0	0	0	0	0	0	0	0	0	0	0	0	0	0	0	0	0	0	0	0	0	0	0	0	0	0	0	0	0	0	0	0	0	0	0
PheA	0	0	0	0	0	0	0	0	0	0	0	0	0	0	0	0	0	0	0	0	0	0	0	0	0	0	0	0	0	0	0	0	0	0	0	0	0	0	0	0	0	0	0	0	0	0	0	0	0
LeuA	0	0	0	0	0	0	0	0	0	0	0	0	0	0	0	0	0	0	0	0	0	0	0	0	0	0	0	0	0	0	0	0	0	0	0	0	0	0	0	0	0	0	0	0	0	0	0	0	0
MhpE	0	0	0	0	0	0	0	0	0	0	0	0	0	0	0	0	0	0	0	0	0	0	0	0	0	0	0	0	0	0	0	0	0	0	0	0	0	0	0	0	0	0	0	0	0	0	0	0	0
GlnB	0	0	0	0	0	0	0	0	0	0	0	0	0	0	0	0	0	0	0	0	0	0	0	0	0	0	0	0	0	0	0	0	0	0	0	0	0	0	0	0	0	0	0	0	0	0	0	0	0
GlnK	0	0	0	0	0	0	0	0	0	0	0	0	0	0	0	0	0	0	0	0	0	0	0	0	0	0	0	0	0	0	0	0	0	0	0	0	0	0	0	0	0	0	0	0	0	0	0	0	0
AmtB	0	0	0	0	0	0	0	0	0	0	0	0	0	0	0	0	0	0	0	0	0	0	0	0	0	0	0	0	0	0	0	0	0	0	0	0	0	0	0	0	0	0	0	0	0	0	0	0	0
ArgI	0	0	0	0	0	0	0	0	0	0	0	0	0	0	0	0	0	0	0	0	0	0	0	0	0	0	0	0	0	0	0	0	0	0	0	0	0	0	0	0	0	0	0	0	0	0	0	0	0
ArgF	0	0	0	0	0	0	0	0	0	0	0	0	0	0	0	0	0	0	0	0	0	0	0	0	0	0	0	0	0	0	0	0	0	0	0	0	0	0	0	0	0	0	0	0	0	0	0	0	0
YgeW	0	0	0	0	0	0	0	0	0	0	0	0	0	0	0	0	0	0	0	0	0	0	0	0	0	0	0	0	0	0	0	0	0	0	0	0	0	0	0	0	0	0	0	0	0	0	0	0	0
MoaC	0	0	0	0	0	0	0	0	0	0	0	0	0	0	0	0	0	0	0	0	0	0	0	0	0	0	0	0	0	0	0	0	0	0	0	0	0	0	0	0	0	0	0	0	0	0	0	0	0
MoaE	0	0	0	0	0	0	0	0	0	0	0	0	0	0	0	0	0	0	0	0	0	0	0	0	0	0	0	0	0	0	0	0	0	0	0	0	0	0	0	0	0	0	0	0	0	0	0	0	0
AsnA	0	0	0	0	0	0	0	0	0	0	0	0	0	0	0	0	0	0	0	0	0	0	0	0	0	0	0	0	0	0	0	0	0	0	0	0	0	0	0	0	0	0	0	0	0	0	0	0	0
TnaA	0	0	0	0	0	0	0	0	0	0	0	0	0	0	0	0	0	0	0	0	0	0	0	0	0	0	0	0	0	0	0	0	0	0	0	0	0	0	0	0	0	0	0	0	0	0	0	0	0
YhaM	0	0	0	0	0	0	0	0	0	0	0	0	0	0	0	0	0	0	0	0	0	0	0	0	0	0	0	0	0	0	0	0	0	0	0	0	0	0	0	0	0	0	0	0	0	0	0	0	0
RpiA	0	0	0	0	0	0	0	0	0	0	0	0	0	0	0	0	0	0	0	0	0	0	0	0	0	0	0	0	0	0	0	0	0	0	0	0	0	0	0	0	0	0	0	0	0	0	0	0	0
PaxA	0	0	0	0	0	0	0	0	0	0	0	0	0	0	0	0	0	0	0	0	0	0	0	0	0	0	0	0	0	0	0	0	0	0	0	0	0	0	0	0	0	0	0	0	0	0	0	0	0
MetF	0	0	0	0	0	0	0	0	0	0	0	0	0	0	0	0	0	0	0	0	0	0	0	0	0	0	0	0	0	0	0	0	0	0	0	0	0	0	0	0	0	0	0	0	0	0	0	0	0
DeoA	0	0	0	0	0	0	0	0	0	0	0	0	0	0	0	0	0	0	0	0	0	0	0	0	0	0	0	0	0	0	0	0	0	0	0	0	0	0	0	0	0	0	0	0	0	0	0	0	0
Cdd	0	0	0	0	0	0	0	0	0	0	0	0	0	0	0	0	0	0	0	0	0	0	0	0	0	0	0	0	0	0	0	0	0	0	0	0	0	0	0	0	0	0	0	0	0	0	0	0	0
LuxS	0	0	0	0	0	0	0	0	0	0	0	0	0	0	0	0	0	0	0	0	0	0	0	0	0	0	0	0	0	0	0	0	0	0	0	0	0	0	0	0	0	0	0	0	0	0	0	0	0
YjiT	0	0	0	0	0	0	0	0	0	0	0	0	0	0	0	0	0	0	0	0	0	0	0	0	0	0	0	0	0	0	0	0	0	0	0	0	0	0	0	0	0	0	0	0	0	0	0	0	0
YnaA	0	0	0	0	0	0	0	0	0	0	0	0	0	0	0	0	0	0	0	0	0	0	0	0	0	0	0	0	0	0	0	0	0	0	0	0	0	0	0	0	0	0	0	0	0	0	0	0	0
GltA	0	0	0	0	0	0	0	0	0	0	0	0	0	0	0	0	0	0	0	0	0	0	0	0	0	0	0	0	0	0	0	0	0	0	0	0	0	0	0	0	0	0	0	0	0	0	0	0	0
PrpC	0	0	0	0	0	0	0	0	0	0	0	0	0	0	0	0	0	0	0	0	0	0	0	0	0	0	0	0	0	0	0	0	0	0	0	0	0	0	0	0	0	0	0	0	0	0	0	0	0
CysK	0	0	0	0	0	0	0	0	0	0	0	0	0	0	0	0	0	0	0	0	0	0	0	0	0	0	0	0	0	0	0	0	0	0	0	0	0	0	0	0	0	0	0	0	0	0	0	0	0
CysM	0	0	0	0	0	0	0	0	0	0	0	0	0	0	0	0	0	0	0	0	0	0	0	0	0	0	0	0	0	0	0	0	0	0	0	0	0	0	0	0	0	0	0	0	0	0	0	0	0
YdiB	0	0	0	0	0	0	0	0	0	0	0	0	0	0	0	0	0	0	0	0	0	0	0	0	0	0	0	0	0	0	0	0	0	0	0	0	0	0	0	0	0	0	0	0	0	0	0	0	0
AroE	0	0	0	0	0	0	0	0	0	0	0	0	0	0	0	0	0	0	0	0	0	0	0	0	0	0	0	0	0	0	0	0	0	0	0	0	0	0	0	0	0	0	0	0	0	0	0	0	0
PykF	0	0	0	0	0	0	0	0	0	0	0	0	0	0	0	0	0	0	0	0	0	0	0	0	0	0	0	0	0	0	0	0	0	0	0	0	0	0	0	0	0	0	0	0	0	0	0	0	0
PykA	0	0	0	0	0	0	0	0	0	0	0	0	0	0	0	0	0	0	0	0	0	0	0	0	0	0	0	0	0	0	0	0	0	0	0	0	0	0	0	0	0	0	0	0	0	0	0	0	0
GldA	0	0	0	0	0	0	0	0	0	0	0	0	0	0	0	0	0	0	0	0	0	0	0	0	0	0	0	0	0	0	0	0	0	0	0	0	0	0	0	0	0	0	0	0	0	0	0	0	0
HcxA	0	0	0	0	0	0	0	0	0	0	0	0	0	0	0	0	0	0	0	0	0	0	0	0	0	0	0	0	0	0	0	0	0	0	0	0	0	0	0	0	0	0	0	0	0	0	0	0	0
PheT	0	0	0	0	0	0	0	0	0	0	0	0	0	0	0	0	0	0	0	0	0	0	0	0	0	0	0	0	0	0	0	0	0	0	0	0	0	0	0	0	0	0	0	0	0	0	0	0	0
UvrB	0	0	0	0	0	0	0	0	0	0	0	0	0	0	0	0	0	0	0	0	0	0	0	0	0	0	0	0	0	0	0	0	0	0	0	0	0	0	0	0	0	0	0	0	0	0	0	0	0
LepA	0	0	0	0	0	0	0	0	0	0	0	0	0	0	0	0	0	0	0	0	0	0	0	0	0	0	0	0	0	0	0	0	0	0	0	0	0	0	0	0	0	0	0	0	0	0	0	0	0
PheS	0	0	0	0	0	0	0	0	0	0	0	0	0	0	0	0	0	0	0	0	0	0	0	0	0	0	0	0	0	0	0	0	0	0	0	0	0	0	0	0	0	0	0	0	0	0	0	0	0
ObgE	0	0	0	0	0	0	0	0	0	0	0	0	0	0	0	0	0	0	0	0	0	0	0	0	0	0	0	0	0	0	0	0	0	0	0	0	0	0	0	0	0	0	0	0	0	0	0	0	0
RpsB	0	0	0	0	0	0	0	0	0	0	0	0	0	0	0	0	0	0	0	0	0	0	0	0	0	0	0	0	0	0	0	0	0	0	0	0	0	0	0	0	0	0	0	0	0	0	0	0	0
TyrS	0	0	0	0	0	0	0	0	0	0	0	0	0	0	0	0	0	0	0	0	0	0	0	0	0	0	0	0	0	0	0	0	0	0	0	0	0	0	0	0	0	0	0	0	0	0	0	0	0
ThrS	0	0	0	0	0	0	0	0	0	0	0	0	0	0	0	0	0	0	0	0	0	0	0	0	0	0	0	0	0	0	0	0	0	0	0	0	0	0	0	0	0	0	0	0	0	0	0	0	0
Pgk	0	0	0	0	0	0	0	0	0	0	0	0	0	0	0	0	0	0	0	0	0	0	0	0	0	0	0	0	0	0	0	0	0	0	0	0	0	0	0	0	0	0	0	0	0	0	0	0	0
ArgS	0	0	0	0	0	0	0	0	0	0	0	0	0	0	0	0	0	0	0	0	0	0	0	0	0	0	0	0	0	0	0	0	0	0	0	0	0	0	0	0	0	0	0	0	0	0	0	0	0
SecY	0	0	0	0	0	0	0	0	0	0	0	0	0	0	0	0	0	0	0	0	0	0	0	0	0	0	0	0	0	0	0	0	0	0	0	0	0	0	0	0	0	0	0	0	0	0	0	0	0
GyrB	0	0	0	0	0	0	0	0	0	0	0	0	0	0	0	0	0	0	0	0	0	0	0	0	0	0	0	0	0	0	0	0	0	0	0	0	0	0	0	0	0	0	0	0	0	0	0	0	0
ParE	0	0	0	0	0	0	0	0	0	0	0	0	0	0	0	0	0	0	0	0	0	0	0	0	0	0	0	0	0	0	0	0	0	0	0	0	0	0	0	0	0	0	0	0	0	0	0	0	0
RuvA	0	0	0	0	0	0	0	0	0	0	0	0	0	0	0	0	0	0	0	0	0	0	0	0	0	0	0	0	0	0	0	0	0	0	0	0	0	0	0	0	0	0	0	0	0	0	0	0	0
RuvB	0	0	0	0	0	0	0	0	0	0	0	0	0	0	0	0	0	0	0	0	0	0	0	0	0	0	0	0	0	0	0	0	0	0	0	0	0	0	0	0	0	0	0	0	0	0	0	0	0
TruB	0	0	0	0	0	0	0	0	0	0	0	0	0	0	0	0	0	0	0	0	0	0	0	0	0	0	0	0	0	0	0	0	0	0	0	0	0	0	0	0	0	0	0	0	0	0	0	0	0
YeaZ	0	0	0	0	0	0	0	0	0	0	0	0	0	0	0	0	0	0	0	0	0	0	0	0	0	0	0	0	0	0	0	0	0	0	0	0	0	0	0	0	0	0	0	0	0	0	0	0	0
TrmD	0	0	0	0	0	0	0	0	0	0	0	0	0	0	0	0	0	0	0	0	0	0	0	0	0	0	0	0	0	0	0	0	0	0	0	0	0	0	0	0	0	0	0	0	0	0	0	0	0
HolA	0	0	0	0	0	0	0	0	0	0	0	0	0	0	0	0	0	0	0	0	0	0	0	0	0	0	0	0	0	0	0	0	0	0	0	0	0	0	0	0	0	0	0	0	0	0	0	0	0
Ffh	0	0	0	0	0	0	0	0	0	0	0	0	0	0	0	0	0	0	0	0	0	0	0	0	0	0	0	0	0	0	0	0	0	0	0	0	0	0	0	0	0	0	0	0	0	0	0	0	0
YchF	0	0	0	0	0	0	0	0	0	0	0	0	0	0	0	0	0	0	0	0	0	0	0	0	0	0	0	0	0	0	0	0	0	0	0	0	0	0	0	0	0	0	0	0	0	0	0	0	0
RnhB	0	0	0	0	0	0	0	0	0	0	0	0	0	0	0	0	0	0	0	0	0	0	0	0	0	0	0	0	0	0	0	0	0	0	0	0	0	0	0	0	0	0	0	0	0	0	0	0	0
ycaI	0	0	0	0	0	0	0	0	0	0	0	0	0	0	0	0	0	0	0	0	0	0	0	0	0	0	0	0	0	0	0	0	0	0	0	0	0	0	0	0	0	0	0	0	0	0	0	0	0
EngB	0	0	0	0	0	0	0	0	0	0	0	0	0	0	0	0	0	0	0	0	0	0	0	0	0	0	0	0	0	0	0	0	0	0	0	0	0	0	0	0	0	0	0	0	0	0	0	0	0
RplT	0	0	0	0	0	0	0	0	0	0	0	0	0	0	0	0	0	0	0	0	0	0	0	0	0	0	0	0	0	0	0	0	0	0	0	0	0	0	0	0	0	0	0	0	0	0	0	0	0
RnpA	0	0	0	0	0	0	0	0	0	0	0	0	0	0	0	0	0	0	0	0	0	0	0	0	0	0	0	0	0	0	0	0	0	0	0	0	0	0	0	0	0	0	0	0	0	0	0	0	0
AlaA	0	0	0	0	0	0	0	0	0	0	0	0	0	0	0	0	0	0	0	0	0	0	0	0	0	0	0	0	0	0	0	0	0	0	0	0	0	0	0	0	0	0	0	0	0	0	0	0	0
AlaC	0	0	0	0	0	0	0	0	0	0	0	0	0	0	0	0	0	0	0	0	0	0	0	0	0	0	0	0	0	0	0	0	0	0	0	0	0	0	0	0	0	0	0	0	0	0	0	0	0
YbdL	0	0	0	0	0	0	0	0	0	0	0	0	0	0	0	0	0	0	0	0	0	0	0	0	0	0	0	0	0	0	0	0	0	0	0	0	0	0	0	0	0	0	0	0	0	0	0	0	0
TalA	0	0	0	0	0	0	0	0	0	0	0	0	0	0	0	0	0	0	0	0	0	0	0	0	0	0	0	0	0	0	0	0	0	0	0	0	0	0	0	0	0	0	0	0	0	0	0	0	0
TalC	0	0	0	0	0	0	0	0	0	0	0	0	0	0	0	0	0	0	0	0	0	0	0	0	0	0	0	0	0	0	0	0	0	0	0	0	0	0	0	0	0	0	0	0	0	0	0	0	0
FsaA	0	0	0	0	0	0	0	0	0	0	0	0	0	0	0	0	0	0	0	0	0	0	0	0	0	0	0	0	0	0	0	0	0	0	0	0	0	0	0	0	0	0	0	0	0	0	0	0	0
TalB	0	0	0	0	0	0	0	0	0	0	0	0	0	0	0	0	0	0	0	0	0	0	0	0	0	0	0	0	0	0	0	0	0	0	0	0	0	0	0	0	0	0	0	0	0	0	0	0	0
YieH	0	0	0	0	0	0	0	0	0	0	0	0	0	0	0	0	0	0	0	0	0	0	0	0	0	0	0	0	0	0	0	0	0	0	0	0	0	0	0	0	0	0	0	0	0	0	0	0	0
YqaB	0	0	0	0	0	0	0	0	0	0	0	0	0	0	0	0	0	0	0	0	0	0	0	0	0	0	0	0	0	0	0	0	0	0	0	0	0	0	0	0	0	0	0	0	0	0	0	0	0
HxpA	0	0	0	0	0	0	0	0	0	0	0	0	0	0	0	0	0	0	0	0	0	0	0	0	0	0	0	0	0	0	0	0	0	0	0	0	0	0	0	0	0	0	0	0	0	0	0	0	0
HxpB	0	0	0	0	0	0	0	0	0	0	0	0	0	0	0	0	0	0	0	0	0	0	0	0	0	0	0	0	0	0	0	0	0	0	0	0	0	0	0	0	0	0	0	0	0	0	0	0	0
PgmB	0	0	0	0	0	0	0	0	0	0	0	0	0	0	0	0	0	0	0	0	0	0	0	0	0	0	0	0	0	0	0	0	0	0	0	0	0	0	0	0	0	0	0	0	0	0	0	0	0
[truncated: 81 more columns]

## Sheet: SD1000
	ThrA	MetL	LysC	IlvH	IlvN	LeuC	LeuD	IlvC	ArgG	HisB	HisA	HisI	HisG	HisH	HisF	HisD	ArgA	ArgB	ArgC	ArgH	TrpE	PabB	PabA	TrpD	YbiB	TrpF	TrpA	TrpB	ArgD	PatA	ArGM	ThiS	ThiG	ThiE	ThrB	ThrC	LeuB	DmlA	CarB	CarA	GltB	ProA	ProB	ProC	MetA	DapB	FolK	AroB	AroC
ThrA	1	1	1	0	0	0	0	1	0	0	0	0	0	0	0	0	0	0	0	0	0	0	0	0	0	0	0	0	0	0	0	0	0	0	1	0	0	0	0	0	0	0	0	0	0	0	0	0	0
MetL	1	1	1	0	0	0	0	1	0	0	0	0	0	0	0	0	0	0	0	0	0	0	0	0	0	0	0	0	0	0	0	0	0	0	1	0	0	0	0	0	0	0	0	0	0	0	0	0	0
LysC	1	1	1	0	0	0	0	0	0	0	0	0	0	0	0	0	0	0	0	0	0	0	0	0	0	0	0	0	0	0	0	0	0	0	0	0	0	0	0	0	0	0	0	0	0	0	0	0	0
IlvH	0	0	0	1	1	1	0	1	0	0	0	0	0	0	0	0	0	0	0	0	0	0	0	0	0	0	0	0	0	0	0	0	0	0	0	0	0	0	0	0	0	0	0	0	0	0	0	0	0
IlvN	0	0	0	1	1	1	0	1	0	0	0	0	0	0	0	0	0	0	0	0	0	0	0	0	0	0	0	0	0	0	0	0	0	0	0	0	0	0	0	0	0	0	0	0	0	0	0	0	0
LeuC	0	0	0	1	1	1	1	0	0	0	0	0	0	0	0	0	0	0	0	0	0	0	0	0	0	0	0	0	0	0	0	0	0	0	0	0	0	0	0	0	0	0	0	0	0	0	0	0	0
LeuD	0	0	0	0	0	1	1	0	0	0	0	0	0	0	0	0	0	0	0	0	0	0	0	0	0	0	0	0	0	0	0	0	0	0	0	0	0	0	0	0	0	0	0	0	0	0	0	0	0
IlvC	1	1	0	1	1	0	0	1	1	1	0	0	0	1	0	0	0	0	0	0	0	0	0	0	0	0	0	0	0	0	0	0	0	0	1	0	0	0	0	0	0	0	0	0	0	0	0	0	0
ArgG	0	0	0	0	0	0	0	1	1	1	1	1	1	1	1	0	0	1	1	0	0	0	0	0	0	0	0	0	0	0	0	0	0	0	0	0	0	0	0	0	0	0	0	0	0	0	0	0	0
HisB	0	0	0	0	0	0	0	1	1	1	1	1	1	1	1	1	0	0	0	0	0	0	0	0	0	0	1	1	0	0	0	0	0	0	0	0	0	0	0	0	0	0	0	0	0	0	0	0	0
HisA	0	0	0	0	0	0	0	0	1	1	1	1	1	1	1	1	0	0	0	0	0	0	0	0	0	0	1	1	0	0	0	0	0	0	0	0	0	0	0	0	0	0	0	0	0	0	0	0	0
HisI	0	0	0	0	0	0	0	0	1	1	1	1	1	1	1	1	0	1	1	0	0	0	0	0	0	1	1	1	0	0	0	0	0	0	0	0	0	0	0	0	0	0	0	0	0	0	0	0	0
HisG	0	0	0	0	0	0	0	0	1	1	1	1	1	1	1	1	0	1	1	0	0	0	0	0	0	1	1	1	0	0	0	0	0	0	0	0	0	0	0	0	0	0	0	0	0	0	0	0	0
HisH	0	0	0	0	0	0	0	1	1	1	1	1	1	1	1	1	0	1	1	0	0	0	0	0	0	0	1	1	0	0	0	0	0	0	0	0	0	0	0	0	0	0	0	0	0	0	0	0	0
HisF	0	0	0	0	0	0	0	0	1	1	1	1	1	1	1	1	0	1	1	0	0	0	0	0	0	0	1	1	0	0	0	0	0	0	0	0	0	0	0	0	0	0	0	0	0	0	0	0	0
HisD	0	0	0	0	0	0	0	0	0	1	1	1	1	1	1	1	0	0	0	0	0	0	0	0	0	0	0	0	0	0	0	0	0	0	0	0	0	0	0	0	0	0	0	0	0	0	0	0	0
ArgA	0	0	0	0	0	0	0	0	0	0	0	0	0	0	0	0	1	1	1	0	0	0	0	0	0	0	0	0	0	0	0	0	0	0	0	0	0	0	0	0	0	0	0	0	0	0	0	0	0
ArgB	0	0	0	0	0	0	0	0	1	0	0	1	1	1	1	0	1	1	1	0	0	0	0	0	0	0	0	0	0	0	0	0	0	0	0	0	0	0	0	0	0	0	0	0	0	0	0	0	0
ArgC	0	0	0	0	0	0	0	0	1	0	0	1	1	1	1	0	1	1	1	0	0	0	0	0	0	0	0	0	0	0	0	0	0	0	0	0	0	0	0	0	0	0	0	0	0	0	0	0	0
ArgH	0	0	0	0	0	0	0	0	0	0	0	0	0	0	0	0	0	0	0	1	0	0	0	0	0	0	0	0	0	0	0	0	0	0	0	0	0	0	0	0	0	0	0	0	0	0	0	0	0
TrpE	0	0	0	0	0	0	0	0	0	0	0	0	0	0	0	0	0	0	0	0	1	1	1	1	1	1	1	1	0	0	0	0	0	0	0	0	0	0	0	0	0	0	0	0	0	0	0	0	0
PabB	0	0	0	0	0	0	0	0	0	0	0	0	0	0	0	0	0	0	0	0	1	1	1	1	1	1	1	1	0	0	0	0	0	0	0	0	0	0	0	0	0	0	0	0	0	0	0	0	0
PabA	0	0	0	0	0	0	0	0	0	0	0	0	0	0	0	0	0	0	0	0	1	1	1	1	0	1	1	0	0	0	0	0	0	0	0	0	0	0	0	0	0	0	0	0	0	0	0	0	0
TrpD	0	0	0	0	0	0	0	0	0	0	0	0	0	0	0	0	0	0	0	0	1	1	1	1	1	1	1	1	0	0	0	0	0	0	0	0	0	0	0	0	0	0	0	0	0	0	0	0	0
YbiB	0	0	0	0	0	0	0	0	0	0	0	0	0	0	0	0	0	0	0	0	1	1	0	1	1	1	1	1	0	0	0	0	0	0	0	0	0	0	0	0	0	0	0	0	0	0	0	0	0
TrpF	0	0	0	0	0	0	0	0	0	0	0	1	1	0	0	0	0	0	0	0	1	1	1	1	1	1	1	1	0	0	0	0	0	0	0	0	0	0	0	0	0	0	0	0	0	0	0	0	0
TrpA	0	0	0	0	0	0	0	0	0	1	1	1	1	1	1	0	0	0	0	0	1	1	1	1	1	1	1	1	0	0	0	0	0	0	0	0	0	0	0	0	0	0	0	0	0	0	0	0	0
TrpB	0	0	0	0	0	0	0	0	0	1	1	1	1	1	1	0	0	0	0	0	1	1	0	1	1	1	1	1	0	0	0	0	0	0	0	0	0	0	0	0	0	0	0	0	0	0	0	0	0
ArgD	0	0	0	0	0	0	0	0	0	0	0	0	0	0	0	0	0	0	0	0	0	0	0	0	0	0	0	0	1	1	1	0	0	0	0	0	0	0	0	0	0	0	0	0	0	0	0	0	0
PatA	0	0	0	0	0	0	0	0	0	0	0	0	0	0	0	0	0	0	0	0	0	0	0	0	0	0	0	0	1	1	1	0	0	0	0	0	0	0	0	0	0	0	0	0	0	0	0	0	0
ArGM	0	0	0	0	0	0	0	0	0	0	0	0	0	0	0	0	0	0	0	0	0	0	0	0	0	0	0	0	1	1	1	0	0	0	0	0	0	0	0	0	0	0	0	0	0	0	0	0	0
ThiS	0	0	0	0	0	0	0	0	0	0	0	0	0	0	0	0	0	0	0	0	0	0	0	0	0	0	0	0	0	0	0	1	1	1	0	0	0	0	0	0	0	0	0	0	0	0	0	0	0
ThiG	0	0	0	0	0	0	0	0	0	0	0	0	0	0	0	0	0	0	0	0	0	0	0	0	0	0	0	0	0	0	0	1	1	1	0	0	0	0	0	0	0	0	0	0	0	0	0	0	0
ThiE	0	0	0	0	0	0	0	0	0	0	0	0	0	0	0	0	0	0	0	0	0	0	0	0	0	0	0	0	0	0	0	1	1	1	0	0	0	0	0	0	0	0	0	0	0	0	0	0	0
ThrB	1	1	0	0	0	0	0	1	0	0	0	0	0	0	0	0	0	0	0	0	0	0	0	0	0	0	0	0	0	0	0	0	0	0	1	0	0	0	0	0	0	0	0	0	0	0	0	0	0
ThrC	0	0	0	0	0	0	0	0	0	0	0	0	0	0	0	0	0	0	0	0	0	0	0	0	0	0	0	0	0	0	0	0	0	0	0	1	0	0	0	0	0	0	0	0	0	0	0	0	0
LeuB	0	0	0	0	0	0	0	0	0	0	0	0	0	0	0	0	0	0	0	0	0	0	0	0	0	0	0	0	0	0	0	0	0	0	0	0	1	1	0	0	0	0	0	0	0	0	0	0	0
DmlA	0	0	0	0	0	0	0	0	0	0	0	0	0	0	0	0	0	0	0	0	0	0	0	0	0	0	0	0	0	0	0	0	0	0	0	0	1	1	0	0	0	0	0	0	0	0	0	0	0
CarB	0	0	0	0	0	0	0	0	0	0	0	0	0	0	0	0	0	0	0	0	0	0	0	0	0	0	0	0	0	0	0	0	0	0	0	0	0	0	1	1	0	0	0	0	0	0	0	0	0
CarA	0	0	0	0	0	0	0	0	0	0	0	0	0	0	0	0	0	0	0	0	0	0	0	0	0	0	0	0	0	0	0	0	0	0	0	0	0	0	1	1	0	0	0	0	0	0	0	0	0
GltB	0	0	0	0	0	0	0	0	0	0	0	0	0	0	0	0	0	0	0	0	0	0	0	0	0	0	0	0	0	0	0	0	0	0	0	0	0	0	0	0	1	0	0	0	0	0	0	0	0
ProA	0	0	0	0	0	0	0	0	0	0	0	0	0	0	0	0	0	0	0	0	0	0	0	0	0	0	0	0	0	0	0	0	0	0	0	0	0	0	0	0	0	1	1	0	0	0	0	0	0
ProB	0	0	0	0	0	0	0	0	0	0	0	0	0	0	0	0	0	0	0	0	0	0	0	0	0	0	0	0	0	0	0	0	0	0	0	0	0	0	0	0	0	1	1	0	0	0	0	0	0
ProC	0	0	0	0	0	0	0	0	0	0	0	0	0	0	0	0	0	0	0	0	0	0	0	0	0	0	0	0	0	0	0	0	0	0	0	0	0	0	0	0	0	0	0	1	0	0	0	0	0
MetA	0	0	0	0	0	0	0	0	0	0	0	0	0	0	0	0	0	0	0	0	0	0	0	0	0	0	0	0	0	0	0	0	0	0	0	0	0	0	0	0	0	0	0	0	1	0	0	0	0
DapB	0	0	0	0	0	0	0	0	0	0	0	0	0	0	0	0	0	0	0	0	0	0	0	0	0	0	0	0	0	0	0	0	0	0	0	0	0	0	0	0	0	0	0	0	0	1	0	0	0
FolK	0	0	0	0	0	0	0	0	0	0	0	0	0	0	0	0	0	0	0	0	0	0	0	0	0	0	0	0	0	0	0	0	0	0	0	0	0	0	0	0	0	0	0	0	0	0	1	0	0
AroB	0	0	0	0	0	0	0	0	0	0	0	0	0	0	0	0	0	0	0	0	0	0	0	0	0	0	0	0	0	0	0	0	0	0	0	0	0	0	0	0	0	0	0	0	0	0	0	1	0
AroC	0	0	0	0	0	0	0	0	0	0	0	0	0	0	0	0	0	0	0	0	0	0	0	0	0	0	0	0	0	0	0	0	0	0	0	0	0	0	0	0	0	0	0	0	0	0	0	0	1
IspE	0	0	0	0	0	0	0	0	0	0	0	0	0	0	0	0	0	0	0	0	0	0	0	0	0	0	0	0	0	0	0	0	0	0	0	0	0	0	0	0	0	0	0	0	0	0	0	0	0
CoaBC	0	0	0	0	0	0	0	0	0	0	0	0	0	0	0	0	0	0	0	0	0	0	0	0	0	0	0	0	0	0	0	0	0	0	0	0	0	0	0	0	0	0	0	0	0	0	0	0	0
PurD	0	0	0	0	0	0	0	0	0	0	0	0	0	0	0	0	0	0	0	0	0	0	0	0	0	0	0	0	0	0	0	0	0	0	0	0	0	0	0	0	0	0	0	0	0	0	0	0	0
PurM	0	0	0	0	0	0	0	0	0	0	0	0	0	0	0	0	0	0	0	0	0	0	0	0	0	0	0	0	0	0	0	0	0	0	0	0	0	0	0	0	0	0	0	0	0	0	0	0	0
PurE	0	0	0	0	0	0	0	0	0	0	0	0	0	0	0	0	0	0	0	0	0	0	0	0	0	0	0	0	0	0	0	0	0	0	0	0	0	0	0	0	0	0	0	0	0	0	0	0	0
PurC	0	0	0	0	0	0	0	0	0	0	0	0	0	0	0	0	0	0	0	0	0	0	0	0	0	0	0	0	0	0	0	0	0	0	0	0	0	0	0	0	0	0	0	0	0	0	0	0	0
PurH	0	0	0	0	0	0	0	0	0	0	0	0	0	0	0	0	0	0	0	0	0	0	0	0	0	0	0	0	0	0	0	0	0	0	0	0	0	0	0	0	0	0	0	0	0	0	0	0	0
PurF	0	0	0	0	0	0	0	0	0	0	0	0	0	0	0	0	0	0	0	0	0	0	0	0	0	0	0	0	0	0	0	0	0	0	0	0	0	0	0	0	0	0	0	0	0	0	0	0	0
PyrF	0	0	0	0	0	0	0	0	0	0	0	0	0	0	0	0	0	0	0	0	0	0	0	0	0	0	0	0	0	0	0	0	0	0	0	0	0	0	0	0	0	0	0	0	0	0	0	0	0
PyrE	0	0	0	0	0	0	0	0	0	0	0	0	0	0	0	0	0	0	0	0	0	0	0	0	0	0	0	0	0	0	0	0	0	0	0	0	0	0	0	0	0	0	0	0	0	0	0	0	0
TyrA	0	0	0	0	0	0	0	0	0	0	0	0	0	0	0	0	0	0	0	0	0	0	0	0	0	0	0	0	0	0	0	0	0	0	0	0	0	0	0	0	0	0	0	0	0	0	0	0	0
PheA	0	0	0	0	0	0	0	0	0	0	0	0	0	0	0	0	0	0	0	0	0	0	0	0	0	0	0	0	0	0	0	0	0	0	0	0	0	0	0	0	0	0	0	0	0	0	0	0	0
LeuA	0	0	0	0	0	0	0	0	0	0	0	0	0	0	0	0	0	0	0	0	0	0	0	0	0	0	0	0	0	0	0	0	0	0	0	0	0	0	0	0	0	0	0	0	0	0	0	0	0
MhpE	0	0	0	0	0	0	0	0	0	0	0	0	0	0	0	0	0	0	0	0	0	0	0	0	0	0	0	0	0	0	0	0	0	0	0	0	0	0	0	0	0	0	0	0	0	0	0	0	0
GlnB	0	0	0	0	0	0	0	0	0	0	0	0	0	0	0	0	0	0	0	0	0	0	0	0	0	0	0	0	0	0	0	0	0	0	0	0	0	0	0	0	0	0	0	0	0	0	0	0	0
GlnK	0	0	0	0	0	0	0	0	0	0	0	0	0	0	0	0	0	0	0	0	0	0	0	0	0	0	0	0	0	0	0	0	0	0	0	0	0	0	0	0	0	0	0	0	0	0	0	0	0
AmtB	0	0	0	0	0	0	0	0	0	0	0	0	0	0	0	0	0	0	0	0	0	0	0	0	0	0	0	0	0	0	0	0	0	0	0	0	0	0	0	0	0	0	0	0	0	0	0	0	0
ArgI	0	0	0	0	0	0	0	0	0	0	0	0	0	0	0	0	0	0	0	0	0	0	0	0	0	0	0	0	0	0	0	0	0	0	0	0	0	0	0	0	0	0	0	0	0	0	0	0	0
ArgF	0	0	0	0	0	0	0	0	0	0	0	0	0	0	0	0	0	0	0	0	0	0	0	0	0	0	0	0	0	0	0	0	0	0	0	0	0	0	0	0	0	0	0	0	0	0	0	0	0
YgeW	0	0	0	0	0	0	0	0	0	0	0	0	0	0	0	0	0	0	0	0	0	0	0	0	0	0	0	0	0	0	0	0	0	0	0	0	0	0	0	0	0	0	0	0	0	0	0	0	0
MoaC	0	0	0	0	0	0	0	0	0	0	0	0	0	0	0	0	0	0	0	0	0	0	0	0	0	0	0	0	0	0	0	0	0	0	0	0	0	0	0	0	0	0	0	0	0	0	0	0	0
MoaE	0	0	0	0	0	0	0	0	0	0	0	0	0	0	0	0	0	0	0	0	0	0	0	0	0	0	0	0	0	0	0	0	0	0	0	0	0	0	0	0	0	0	0	0	0	0	0	0	0
AsnA	0	0	0	0	0	0	0	0	0	0	0	0	0	0	0	0	0	0	0	0	0	0	0	0	0	0	0	0	0	0	0	0	0	0	0	0	0	0	0	0	0	0	0	0	0	0	0	0	0
TnaA	0	0	0	0	0	0	0	0	0	0	0	0	0	0	0	0	0	0	0	0	0	0	0	0	0	0	0	0	0	0	0	0	0	0	0	0	0	0	0	0	0	0	0	0	0	0	0	0	0
YhaM	0	0	0	0	0	0	0	0	0	0	0	0	0	0	0	0	0	0	0	0	0	0	0	0	0	0	0	0	0	0	0	0	0	0	0	0	0	0	0	0	0	0	0	0	0	0	0	0	0
RpiA	0	0	0	0	0	0	0	0	0	0	0	0	0	0	0	0	0	0	0	0	0	0	0	0	0	0	0	0	0	0	0	0	0	0	0	0	0	0	0	0	0	0	0	0	0	0	0	0	0
PaxA	0	0	0	0	0	0	0	0	0	0	0	0	0	0	0	0	0	0	0	0	0	0	0	0	0	0	0	0	0	0	0	0	0	0	0	0	0	0	0	0	0	0	0	0	0	0	0	0	0
MetF	0	0	0	0	0	0	0	0	0	0	0	0	0	0	0	0	0	0	0	0	0	0	0	0	0	0	0	0	0	0	0	0	0	0	0	0	0	0	0	0	0	0	0	0	0	0	0	0	0
DeoA	0	0	0	0	0	0	0	0	0	0	0	0	0	0	0	0	0	0	0	0	0	0	0	0	0	0	0	0	0	0	0	0	0	0	0	0	0	0	0	0	0	0	0	0	0	0	0	0	0
Cdd	0	0	0	0	0	0	0	0	0	0	0	0	0	0	0	0	0	0	0	0	0	0	0	0	0	0	0	0	0	0	0	0	0	0	0	0	0	0	0	0	0	0	0	0	0	0	0	0	0
LuxS	0	0	0	0	0	0	0	0	0	0	0	0	0	0	0	0	0	0	0	0	0	0	0	0	0	0	0	0	0	0	0	0	0	0	0	0	0	0	0	0	0	0	0	0	0	0	0	0	0
YjiT	0	0	0	0	0	0	0	0	0	0	0	0	0	0	0	0	0	0	0	0	0	0	0	0	0	0	0	0	0	0	0	0	0	0	0	0	0	0	0	0	0	0	0	0	0	0	0	0	0
YnaA	0	0	0	0	0	0	0	0	0	0	0	0	0	0	0	0	0	0	0	0	0	0	0	0	0	0	0	0	0	0	0	0	0	0	0	0	0	0	0	0	0	0	0	0	0	0	0	0	0
GltA	0	0	0	0	0	0	0	0	0	0	0	0	0	0	0	0	0	0	0	0	0	0	0	0	0	0	0	0	0	0	0	0	0	0	0	0	0	0	0	0	0	0	0	0	0	0	0	0	0
PrpC	0	0	0	0	0	0	0	0	0	0	0	0	0	0	0	0	0	0	0	0	0	0	0	0	0	0	0	0	0	0	0	0	0	0	0	0	0	0	0	0	0	0	0	0	0	0	0	0	0
CysK	0	0	0	0	0	0	0	0	0	0	0	0	0	0	0	0	0	0	0	0	0	0	0	0	0	0	0	0	0	0	0	0	0	0	0	0	0	0	0	0	0	0	0	0	0	0	0	0	0
CysM	0	0	0	0	0	0	0	0	0	0	0	0	0	0	0	0	0	0	0	0	0	0	0	0	0	0	0	0	0	0	0	0	0	0	0	0	0	0	0	0	0	0	0	0	0	0	0	0	0
YdiB	0	0	0	0	0	0	0	0	0	0	0	0	0	0	0	0	0	0	0	0	0	0	0	0	0	0	0	0	0	0	0	0	0	0	0	0	0	0	0	0	0	0	0	0	0	0	0	0	0
AroE	0	0	0	0	0	0	0	0	0	0	0	0	0	0	0	0	0	0	0	0	0	0	0	0	0	0	0	0	0	0	0	0	0	0	0	0	0	0	0	0	0	0	0	0	0	0	0	0	0
PykF	0	0	0	0	0	0	0	0	0	0	0	0	0	0	0	0	0	0	0	0	0	0	0	0	0	0	0	0	0	0	0	0	0	0	0	0	0	0	0	0	0	0	0	0	0	0	0	0	0
PykA	0	0	0	0	0	0	0	0	0	0	0	0	0	0	0	0	0	0	0	0	0	0	0	0	0	0	0	0	0	0	0	0	0	0	0	0	0	0	0	0	0	0	0	0	0	0	0	0	0
GldA	0	0	0	0	0	0	0	0	0	0	0	0	0	0	0	0	0	0	0	0	0	0	0	0	0	0	0	0	0	0	0	0	0	0	0	0	0	0	0	0	0	0	0	0	0	0	0	0	0
HcxA	0	0	0	0	0	0	0	0	0	0	0	0	0	0	0	0	0	0	0	0	0	0	0	0	0	0	0	0	0	0	0	0	0	0	0	0	0	0	0	0	0	0	0	0	0	0	0	0	0
PheT	0	0	0	0	0	0	0	0	0	0	0	0	0	0	0	0	0	0	0	0	0	0	0	0	0	0	0	0	0	0	0	0	0	0	0	0	0	0	0	0	0	0	0	0	0	0	0	0	0
UvrB	0	0	0	0	0	0	0	0	0	0	0	0	0	0	0	0	0	0	0	0	0	0	0	0	0	0	0	0	0	0	0	0	0	0	0	0	0	0	0	0	0	0	0	0	0	0	0	0	0
LepA	0	0	0	0	0	0	0	0	0	0	0	0	0	0	0	0	0	0	0	0	0	0	0	0	0	0	0	0	0	0	0	0	0	0	0	0	0	0	0	0	0	0	0	0	0	0	0	0	0
PheS	0	0	0	0	0	0	0	0	0	0	0	0	0	0	0	0	0	0	0	0	0	0	0	0	0	0	0	0	0	0	0	0	0	0	0	0	0	0	0	0	0	0	0	0	0	0	0	0	0
ObgE	0	0	0	0	0	0	0	0	0	0	0	0	0	0	0	0	0	0	0	0	0	0	0	0	0	0	0	0	0	0	0	0	0	0	0	0	0	0	0	0	0	0	0	0	0	0	0	0	0
RpsB	0	0	0	0	0	0	0	0	0	0	0	0	0	0	0	0	0	0	0	0	0	0	0	0	0	0	0	0	0	0	0	0	0	0	0	0	0	0	0	0	0	0	0	0	0	0	0	0	0
TyrS	0	0	0	0	0	0	0	0	0	0	0	0	0	0	0	0	0	0	0	0	0	0	0	0	0	0	0	0	0	0	0	0	0	0	0	0	0	0	0	0	0	0	0	0	0	0	0	0	0
ThrS	0	0	0	0	0	0	0	0	0	0	0	0	0	0	0	0	0	0	0	0	0	0	0	0	0	0	0	0	0	0	0	0	0	0	0	0	0	0	0	0	0	0	0	0	0	0	0	0	0
Pgk	0	0	0	0	0	0	0	0	0	0	0	0	0	0	0	0	0	0	0	0	0	0	0	0	0	0	0	0	0	0	0	0	0	0	0	0	0	0	0	0	0	0	0	0	0	0	0	0	0
ArgS	0	0	0	0	0	0	0	0	0	0	0	0	0	0	0	0	0	0	0	0	0	0	0	0	0	0	0	0	0	0	0	0	0	0	0	0	0	0	0	0	0	0	0	0	0	0	0	0	0
SecY	0	0	0	0	0	0	0	0	0	0	0	0	0	0	0	0	0	0	0	0	0	0	0	0	0	0	0	0	0	0	0	0	0	0	0	0	0	0	0	0	0	0	0	0	0	0	0	0	0
GyrB	0	0	0	0	0	0	0	0	0	0	0	0	0	0	0	0	0	0	0	0	0	0	0	0	0	0	0	0	0	0	0	0	0	0	0	0	0	0	0	0	0	0	0	0	0	0	0	0	0
ParE	0	0	0	0	0	0	0	0	0	0	0	0	0	0	0	0	0	0	0	0	0	0	0	0	0	0	0	0	0	0	0	0	0	0	0	0	0	0	0	0	0	0	0	0	0	0	0	0	0
RuvA	0	0	0	0	0	0	0	0	0	0	0	0	0	0	0	0	0	0	0	0	0	0	0	0	0	0	0	0	0	0	0	0	0	0	0	0	0	0	0	0	0	0	0	0	0	0	0	0	0
RuvB	0	0	0	0	0	0	0	0	0	0	0	0	0	0	0	0	0	0	0	0	0	0	0	0	0	0	0	0	0	0	0	0	0	0	0	0	0	0	0	0	0	0	0	0	0	0	0	0	0
TruB	0	0	0	0	0	0	0	0	0	0	0	0	0	0	0	0	0	0	0	0	0	0	0	0	0	0	0	0	0	0	0	0	0	0	0	0	0	0	0	0	0	0	0	0	0	0	0	0	0
YeaZ	0	0	0	0	0	0	0	0	0	0	0	0	0	0	0	0	0	0	0	0	0	0	0	0	0	0	0	0	0	0	0	0	0	0	0	0	0	0	0	0	0	0	0	0	0	0	0	0	0
TrmD	0	0	0	0	0	0	0	0	0	0	0	0	0	0	0	0	0	0	0	0	0	0	0	0	0	0	0	0	0	0	0	0	0	0	0	0	0	0	0	0	0	0	0	0	0	0	0	0	0
HolA	0	0	0	0	0	0	0	0	0	0	0	0	0	0	0	0	0	0	0	0	0	0	0	0	0	0	0	0	0	0	0	0	0	0	0	0	0	0	0	0	0	0	0	0	0	0	0	0	0
Ffh	0	0	0	0	0	0	0	0	0	0	0	0	0	0	0	0	0	0	0	0	0	0	0	0	0	0	0	0	0	0	0	0	0	0	0	0	0	0	0	0	0	0	0	0	0	0	0	0	0
YchF	0	0	0	0	0	0	0	0	0	0	0	0	0	0	0	0	0	0	0	0	0	0	0	0	0	0	0	0	0	0	0	0	0	0	0	0	0	0	0	0	0	0	0	0	0	0	0	0	0
RnhB	0	0	0	0	0	0	0	0	0	0	0	0	0	0	0	0	0	0	0	0	0	0	0	0	0	0	0	0	0	0	0	0	0	0	0	0	0	0	0	0	0	0	0	0	0	0	0	0	0
ycaI	0	0	0	0	0	0	0	0	0	0	0	0	0	0	0	0	0	0	0	0	0	0	0	0	0	0	0	0	0	0	0	0	0	0	0	0	0	0	0	0	0	0	0	0	0	0	0	0	0
EngB	0	0	0	0	0	0	0	0	0	0	0	0	0	0	0	0	0	0	0	0	0	0	0	0	0	0	0	0	0	0	0	0	0	0	0	0	0	0	0	0	0	0	0	0	0	0	0	0	0
RplT	0	0	0	0	0	0	0	0	0	0	0	0	0	0	0	0	0	0	0	0	0	0	0	0	0	0	0	0	0	0	0	0	0	0	0	0	0	0	0	0	0	0	0	0	0	0	0	0	0
RnpA	0	0	0	0	0	0	0	0	0	0	0	0	0	0	0	0	0	0	0	0	0	0	0	0	0	0	0	0	0	0	0	0	0	0	0	0	0	0	0	0	0	0	0	0	0	0	0	0	0
AlaA	0	0	0	0	0	0	0	0	0	0	0	0	0	0	0	0	0	0	0	0	0	0	0	0	0	0	0	0	0	0	0	0	0	0	0	0	0	0	0	0	0	0	0	0	0	0	0	0	0
AlaC	0	0	0	0	0	0	0	0	0	0	0	0	0	0	0	0	0	0	0	0	0	0	0	0	0	0	0	0	0	0	0	0	0	0	0	0	0	0	0	0	0	0	0	0	0	0	0	0	0
YbdL	0	0	0	0	0	0	0	0	0	0	0	0	0	0	0	0	0	0	0	0	0	0	0	0	0	0	0	0	0	0	0	0	0	0	0	0	0	0	0	0	0	0	0	0	0	0	0	0	0
TalA	0	0	0	0	0	0	0	0	0	0	0	0	0	0	0	0	0	0	0	0	0	0	0	0	0	0	0	0	0	0	0	0	0	0	0	0	0	0	0	0	0	0	0	0	0	0	0	0	0
TalC	0	0	0	0	0	0	0	0	0	0	0	0	0	0	0	0	0	0	0	0	0	0	0	0	0	0	0	0	0	0	0	0	0	0	0	0	0	0	0	0	0	0	0	0	0	0	0	0	0
FsaA	0	0	0	0	0	0	0	0	0	0	0	0	0	0	0	0	0	0	0	0	0	0	0	0	0	0	0	0	0	0	0	0	0	0	0	0	0	0	0	0	0	0	0	0	0	0	0	0	0
TalB	0	0	0	0	0	0	0	0	0	0	0	0	0	0	0	0	0	0	0	0	0	0	0	0	0	0	0	0	0	0	0	0	0	0	0	0	0	0	0	0	0	0	0	0	0	0	0	0	0
YieH	0	0	0	0	0	0	0	0	0	0	0	0	0	0	0	0	0	0	0	0	0	0	0	0	0	0	0	0	0	0	0	0	0	0	0	0	0	0	0	0	0	0	0	0	0	0	0	0	0
YqaB	0	0	0	0	0	0	0	0	0	0	0	0	0	0	0	0	0	0	0	0	0	0	0	0	0	0	0	0	0	0	0	0	0	0	0	0	0	0	0	0	0	0	0	0	0	0	0	0	0
HxpA	0	0	0	0	0	0	0	0	0	0	0	0	0	0	0	0	0	0	0	0	0	0	0	0	0	0	0	0	0	0	0	0	0	0	0	0	0	0	0	0	0	0	0	0	0	0	0	0	0
HxpB	0	0	0	0	0	0	0	0	0	0	0	0	0	0	0	0	0	0	0	0	0	0	0	0	0	0	0	0	0	0	0	0	0	0	0	0	0	0	0	0	0	0	0	0	0	0	0	0	0
PgmB	0	0	0	0	0	0	0	0	0	0	0	0	0	0	0	0	0	0	0	0	0	0	0	0	0	0	0	0	0	0	0	0	0	0	0	0	0	0	0	0	0	0	0	0	0	0	0	0	0
[truncated: 81 more columns]

## Sheet: David_Output_SD50
Spectral Depth 50; Amino Acid Biosynthesis Module
Category	Term	Count	%	PValue	Genes	List Total	Pop Hits	Pop Total	Fold Enrichment	Bonferroni	Benjamini	FDR
UP_KEYWORDS	Amino-acid biosynthesis	50	39.0625	5.18482e-50	P30126, P07623, P0A6E4, P11447, P11446, P0A6A6, P00909, P30125, P15770, P00904, P00547, P0A9L8, P06988, P06987, P07639, P06989, P0A6F1, P16703, P18335, P10371, P0ADF8, P00934, P60664, P00895, P07004, P00894, P0A6C5, P0A6C8, P0ABK5, P0A877, P60595, P00968, P09151, P00963, P08660, P06960, P60757, P05793, P0AEZ1, P00561, P09831, P00562, P0A879, P0A9J8, P0A6D5, P12008, P0A7B5, P04391, P07023, P04036	128	103	4139	15.6971	6.16993e-48	6.16993e-48	4.82188e-48
KEGG_PATHWAY	eco01230:Biosynthesis of amino acids	55	42.9688	1.22644e-38	P30126, P07623, P0A6E4, P11447, P11446, P0A6A6, P00909, P30125, P15770, P00904, P00547, P45578, P0A9L8, P06988, P06987, P07639, P06989, P16703, P18335, P10371, P0ADF8, P00934, P0AD61, P60664, P00895, P07004, P00894, P0A867, P0A6C5, P0A7Z0, P0A6C8, P0ABK5, P0A799, P0A877, P60595, P09151, P0A870, P00963, P08660, P0A959, P06960, P60757, P05793, P00561, P09831, P00562, P0A879, P0A9J8, P12008, P0A7B5,…	103	118	1564	7.07751	6.86805e-37	6.86805e-37	5.39633e-37
KEGG_PATHWAY	eco01110:Biosynthesis of secondary metabolites	60	46.875	4.1167e-20	P30126, P07623, P0A6E4, P11447, P11446, P0A6A6, P00909, P30125, P15770, P00904, P00547, P0A9L8, P06988, P06987, P07639, P06989, P18335, P0A7D7, P10371, P0ADF8, P00934, P0AD61, P08178, P60664, P00895, P07004, P00894, P0A867, P0A6C5, P0A7Z0, P0A6C8, P0ABK5, P0A799, P0A877, P60595, P09151, P0A870, P00963, P08660, P0A959, P62615, P06960, P60757, P05793, P00561, P09831, P00562, P0A879, P0A9J8, P0A6D5,…	103	292	1564	3.1201	2.30535e-18	1.15268e-18	9.05673e-19
GOTERM_CC_DIRECT	GO:0005829~cytosol	82	64.0625	8.69436e-15	P30126, P0AES6, P0A6E4, P0ABQ0, P20083, P11447, P0A6A6, P30125, P00903, P15770, P00904, P0A853, P00547, P08244, P07395, P77581, P0A7L3, P45578, P0A738, P0A812, P42588, P77247, P0A9L8, P06988, P06989, P0A6F1, P18335, P0A7D7, P10371, P0ADF8, P00934, P60340, P0ABF6, P0AD61, P08178, P60664, P60785, P00895, P07004, P00894, P28248, P0A867, P0AGD7, P0A7E3, P30749, P0A9Z1, P0A7Z0, P0ABK5, P0A799, P0A877,…	117	1033	2941	1.99537	2.42473e-13	2.43442e-13	2.43442e-13
KEGG_PATHWAY	eco01100:Metabolic pathways	82	64.0625	3.29199e-14	P30126, P07623, P0A6E4, P0ABQ0, P51020, P11447, P11446, P0A6A6, P00909, P30125, P15770, P00904, P00547, P08244, P77581, P45578, P0A738, P42588, P0A9L8, P06988, P06987, P07639, P06989, P0A6F1, P16703, P18335, P0A7D7, P10371, P0ADF8, P00934, P0ABF6, P0AD61, P08178, P60664, P00895, P07004, P00894, P28248, P0A867, P0A6C5, P0A7E3, P30749, P26281, P0A7Z0, P0A6C8, P0ABK5, P0A799, P0A877, P60595, P00968,…	103	685	1564	1.8177	1.84652e-12	6.14504e-13	4.82825e-13
KEGG_PATHWAY	eco01130:Biosynthesis of antibiotics	41	32.0312	6.44783e-13	P0A6C5, P0A6E4, P0A7Z0, P11447, P11446, P0A6C8, P0ABK5, P0A799, P15770, P0A870, P0A959, P62615, P08660, P06960, P05793, P00561, P09831, P00562, P0A9J8, P0A6D5, P0A9L8, P07639, P15639, P12008, P0AG18, P0AG16, P18335, P0A7D7, P0A7B5, P15640, P0ADF8, P0ABH7, P04391, P0AD61, P08178, P07023, P07004, P00894, P21599, P0A867, P04036	103	194	1564	3.20909	3.61098e-11	9.02697e-12	7.09262e-12
UP_KEYWORDS	Cytoplasm	53	41.4062	2.73421e-12	P07623, P0AES6, P0A6E4, P32669, P0A809, P11447, P11446, P30125, P0A853, P00547, P07395, P76251, P0A812, P0A9L8, P06987, P07639, P06989, P77366, P77806, P18335, P10442, P0A8F8, P10371, P08178, P60664, P07004, P0A867, P0AGD7, P77434, P0A6C5, P0A6C8, P0A799, P60595, P0A873, P0A870, P00963, P0A959, P78055, P06960, P60757, P05793, P42641, P0A9J8, P76256, P30139, P11875, P0A7B5, P0AGJ9, P04391, P0A8M3,…	128	647	4139	2.64885	3.25377e-10	1.46862e-10	1.14775e-10
UP_KEYWORDS	Arginine biosynthesis	10	7.8125	3.70241e-12	P0A6C5, P0A6E4, P00968, P0A6F1, P04391, P11447, P11446, P06960, P0A6C8, P18335	128	12	4139	26.9466	4.40582e-10	1.46862e-10	1.14775e-10
UP_KEYWORDS	Aromatic amino acid biosynthesis	11	8.59375	1.37622e-10	P0A6D5, P0A9J8, P0A877, P00904, P15770, P07639, P12008, P00895, P07023, P00909, P0A879	128	21	4139	16.9379	1.6377e-08	4.09426e-09	3.19972e-09
GOTERM_BP_DIRECT	GO:0008652~cellular amino acid biosynthetic process	14	10.9375	3.5197e-10	P0A6D5, P07639, P16703, P12008, P00909, P0ABK5, P0A877, P15770, P00904, P00968, P00895, P09831, P0A879, P04036	127	37	3277	9.76335	5.8427e-08	5.8427e-08	5.45553e-08
UP_KEYWORDS	Transferase	45	35.1562	9.1694e-10	P0A6C5, P77434, P07623, P0A7E3, P30749, P26281, P0A6C8, P0ABK5, P0A799, P00903, P00904, P60595, P0A873, P09151, P0A870, P00547, P77581, P0A959, P62615, P08660, P07650, P06960, P60757, P00561, P00562, P42588, P30137, P30139, P28630, P15639, P16703, P77806, P31660, P30177, P0AG16, P18335, P0A7B5, P0ADF8, P0ABH7, P04391, P0AD61, P05041, P00894, P21599, P0A867	128	566	4139	2.57088	1.09116e-07	2.18232e-08	1.70551e-08
KEGG_PATHWAY	eco01210:2-Oxocarboxylic acid metabolism	14	10.9375	9.31561e-10	P30126, P0A6C5, P11446, P0A6A6, P0A6C8, P18335, P30125, P0ADF8, P0ABH7, P09151, P0A959, P08660, P00894, P05793	103	26	1564	8.17625	5.21674e-08	1.04335e-08	8.19774e-09
UP_KEYWORDS	Lyase	22	17.1875	6.27276e-09	P30126, P0A9J8, P06987, P32669, P07639, P0ABQ0, P51020, P11447, P12008, P00909, P0A6A6, P0ABK5, P0A877, P0A853, P00904, P00934, P08244, P60664, P00895, P78055, P45578, P0A879	128	157	4139	4.53115	7.46458e-07	1.2441e-07	9.72278e-08
GOTERM_MF_DIRECT	GO:0000287~magnesium ion binding	26	20.3125	9.4003e-09	P0AES6, P0A7E3, P77475, P20083, P26281, P30125, P00904, P0A873, P07395, P0A6P7, P76251, P60757, P42641, P05793, P30137, P77247, P77366, P77625, P0AG16, P31467, P0A7B5, P15640, P0AD61, P05041, P21599, P08312	126	178	3186	3.69342	1.71085e-06	1.71085e-06	1.66385e-06
GOTERM_BP_DIRECT	GO:0006526~arginine biosynthetic process	8	6.25	1.14925e-08	P0A6C5, P0A6E4, P00968, P0A6F1, P11447, P11446, P0A6C8, P18335	127	10	3277	20.6425	1.90775e-06	9.53876e-07	8.90667e-07
UP_KEYWORDS	Nucleotide-binding	39	30.4688	1.75016e-08	P0AES6, P0A6E4, P0A809, P20083, P0A9Z1, P26281, P0A6C8, P0A799, P00968, P00547, P00963, P07395, P0A6P7, P62615, P08660, P60757, P42641, P05793, P00561, P0A812, P00562, P0AC55, P06989, P0A6F1, P11875, P0A7D7, P0A8F8, P0A7B5, P15640, P0AGJ9, O32583, P0AD61, P08178, P0ABU2, P60785, P0A8M3, P21599, P08312, P0AGD7	128	486	4139	2.59486	2.08269e-06	2.97528e-07	2.32522e-07
GOTERM_CC_DIRECT	GO:0005737~cytoplasm	47	36.7188	4.46419e-08	P0A6C5, P77434, P07623, P0AES6, P0A6E4, P0A7E3, P32669, P0A809, P77475, P11446, P0A6C8, P0ABK5, P0A877, P00968, P08244, P0A959, P76251, P78055, P06960, P09831, P0A879, P30137, P0A9J8, P06987, P07639, Q46803, P0A6F1, P77366, P16703, P77806, P31660, P11875, P77625, P0AG16, P31467, P10442, P0A8F8, P0A7B5, P00934, P04391, P0ABU2, P05041, P0A8M3, P07023, P07004, P08312, P28248	117	544	2941	2.17174	1.24997e-06	6.24987e-07	6.24987e-07
UP_KEYWORDS	Magnesium	26	20.3125	8.19922e-08	P0AES6, P0A7E3, P0ABQ0, P77475, P20083, P30125, P07395, P0A6P7, P76251, P60757, P42641, P05793, P30137, P77247, P06987, P77366, P77625, P0AG16, P31467, P15640, P0AD61, P0ABU2, P05041, P00895, P21599, P08312	128	250	4139	3.36294	9.75703e-06	1.21963e-06	9.5316e-07
UP_KEYWORDS	Histidine biosynthesis	7	5.46875	1.4095e-07	P10371, P06988, P06987, P60595, P06989, P60664, P60757	128	10	4139	22.6352	1.67729e-05	1.86367e-06	1.45648e-06
KEGG_PATHWAY	eco00400:Phenylalanine, tyrosine and tryptophan biosynthesis	11	8.59375	1.74307e-07	P0A6D5, P0A9J8, P0A877, P00904, P15770, P07639, P12008, P00895, P07023, P00909, P0A879	103	21	1564	7.95377	9.76117e-06	1.62687e-06	1.27825e-06
INTERPRO	IPR013785:Aldolase-type TIM barrel	14	10.9375	1.74379e-07	P30137, P30139, P32669, P51020, P00909, P0A877, P10371, P0A870, P09151, P08244, P60664, P78055, P0A867, P09831	128	69	3956	6.27083	6.85286e-05	6.8531e-05	6.53922e-05
GOTERM_BP_DIRECT	GO:0000050~urea cycle	6	4.6875	4.52343e-07	P0A6E4, P00968, Q46803, P0A6F1, P04391, P06960	127	6	3277	25.8031	7.50861e-05	2.20639e-05	2.06018e-05
GOTERM_BP_DIRECT	GO:0000105~histidine biosynthetic process	7	5.46875	5.3166e-07	P10371, P06988, P06987, P60595, P06989, P60664, P60757	127	10	3277	18.0622	8.82517e-05	2.20639e-05	2.06018e-05
UP_KEYWORDS	Allosteric enzyme	10	7.8125	6.53003e-07	P07623, P00904, P0ABH7, P04391, P0AD61, P00895, P08660, P21599, P0ABK5, P00561	128	35	4139	9.23884	7.77044e-05	7.77074e-06	6.07293e-06
GOTERM_BP_DIRECT	GO:0000162~tryptophan biosynthetic process	6	4.6875	1.53444e-06	P0A877, P00903, P00904, P00895, P00909, P0A879	127	7	3277	22.117	0.000254685	4.24529e-05	3.96398e-05
GOTERM_BP_DIRECT	GO:0042450~arginine biosynthetic process via ornithine	6	4.6875	1.53444e-06	Q46803, P04391, P77581, P11447, P06960, P18335	127	7	3277	22.117	0.000254685	4.24529e-05	3.96398e-05
UP_KEYWORDS	ATP-binding	31	24.2188	3.93929e-06	P0AES6, P0A6E4, P0A809, P20083, P26281, P0A6C8, P0A799, P00968, P00547, P00963, P07395, P62615, P08660, P60757, P00561, P0A812, P00562, P06989, P0A6F1, P11875, P0A7D7, P0A8F8, P0A7B5, P15640, P0AGJ9, P0AD61, P08178, P0ABU2, P0A8M3, P21599, P08312	128	412	4139	2.43304	0.000468667	4.2616e-05	3.33049e-05
KEGG_PATHWAY	eco00340:Histidine metabolism	7	5.46875	4.77455e-06	P10371, P06988, P06987, P60595, P06989, P60664, P60757	103	9	1564	11.8101	0.00026734	3.81964e-05	3.00114e-05
GOTERM_MF_DIRECT	GO:0016597~amino acid binding	9	7.03125	5.32179e-06	P0A9J8, P0ADF8, P00968, Q46803, P04391, P08660, P06960, P00894, P00561	126	27	3186	8.42857	0.000968099	0.000484282	0.000470978
KEGG_PATHWAY	eco00220:Arginine biosynthesis	9	7.03125	6.33822e-06	P0A6C5, P0A6E4, P04391, P11447, P0A959, P11446, P06960, P0A6C8, P18335	103	18	1564	7.59223	0.000354878	4.43675e-05	3.48602e-05
INTERPRO	IPR001048:Aspartate/glutamate/uridylate kinase	6	4.6875	6.98366e-06	P0A6C5, P08660, P0A6C8, P00561, P0A7B5, P00562	128	10	3956	18.5437	0.00274083	0.00137229	0.00130944
GOTERM_MF_DIRECT	GO:0030170~pyridoxal phosphate binding	12	9.375	8.67115e-06	P0A877, P77434, P0A853, P00934, P77581, P77806, P16703, P0A959, P0ABK5, P18335, P0A879, P42588	126	57	3186	5.32331	0.00157691	0.00052605	0.000511598
UP_KEYWORDS	Pyridoxal phosphate	11	8.59375	9.09764e-06	P77434, P0A853, P00934, P77581, P77806, P16703, P0A959, P0ABK5, P18335, P0A879, P42588	128	59	4139	6.02873	0.00108204	8.44467e-05	6.59961e-05
UP_KEYWORDS	Multifunctional enzyme	10	7.8125	9.22527e-06	P0A9J8, P06987, P00904, P06989, P0ABQ0, P15639, P07023, P00909, P00561, P00562	128	47	4139	6.87999	0.00109721	8.44467e-05	6.59961e-05
UP_KEYWORDS	Branched-chain amino acid biosynthesis	7	5.46875	1.01729e-05	P30126, P0ADF8, P09151, P0A6A6, P05793, P00894, P30125	128	18	4139	12.5751	0.00120985	8.64695e-05	6.7577e-05
UP_KEYWORDS	Tryptophan biosynthesis	5	3.90625	1.20986e-05	P0A877, P00904, P00895, P00909, P0A879	128	6	4139	26.9466	0.0014387	9.5982e-05	7.50112e-05
UP_KEYWORDS	Glutamine amidotransferase	6	4.6875	1.67545e-05	P00903, P00904, P60595, P0A6F1, P0AG16, P09831	128	12	4139	16.168	0.00199181	0.000124611	9.73853e-05
UP_KEYWORDS	Ligase	13	10.1562	1.86008e-05	P0A6E4, P0A6F1, P0ABQ0, P11875, P0A7D7, P15640, P0AGJ9, P00968, P00963, P08178, P07395, P0A8M3, P08312	128	92	4139	4.56921	0.00221107	0.000130206	0.000101757
GOTERM_MF_DIRECT	GO:0050661~NADP binding	8	6.25	2.40011e-05	P0A6D5, P0A9L8, P15770, P07004, P05793, P00561, P04036, P00562	126	24	3186	8.42857	0.00435873	0.00109205	0.00106205
KEGG_PATHWAY	eco00290:Valine, leucine and isoleucine biosynthesis	8	6.25	2.87935e-05	P30126, P0ADF8, P09151, P0A959, P0A6A6, P05793, P00894, P30125	103	16	1564	7.59223	0.00161116	0.00017916	0.000140768
GOTERM_BP_DIRECT	GO:0006189~'de novo' IMP biosynthetic process	6	4.6875	4.95071e-05	P15640, P15639, P08178, P0AG18, P0AG16, P0A7D7	127	12	3277	12.9016	0.00818471	0.00117403	0.00109623
UP_KEYWORDS	NADP	12	9.375	7.78917e-05	P0A6D5, P0A9L8, P15770, P12008, P11446, P07004, P05793, P0AEZ1, P00561, P09831, P04036, P00562	128	90	4139	4.31146	0.00922665	0.000514951	0.000402441
UP_KEYWORDS	Purine biosynthesis	6	4.6875	0.00011565	P15640, P15639, P08178, P0AG18, P0AG16, P0A7D7	128	17	4139	11.4127	0.0136689	0.000724337	0.000566079
GOTERM_BP_DIRECT	GO:0009073~aromatic amino acid family biosynthetic process	6	4.6875	0.000117586	P0A6D5, P0A877, P15770, P07639, P12008, P0A879	127	14	3277	11.0585	0.0193312	0.00243992	0.00227824
INTERPRO	IPR018225:Transaldolase, active site	4	3.125	0.000126289	P32669, P0A870, P78055, P0A867	128	4	3956	30.9062	0.048423	0.0124079	0.0118396
INTERPRO	IPR001585:Transaldolase	4	3.125	0.000126289	P32669, P0A870, P78055, P0A867	128	4	3956	30.9062	0.048423	0.0124079	0.0118396
INTERPRO	IPR006439:HAD-superfamily hydrolase, subfamily IA, variant 1	5	3.90625	0.000183147	P77247, P77475, P77366, P77625, P31467	128	10	3956	15.4531	0.0694538	0.0143954	0.0137361
UP_KEYWORDS	Metal-binding	36	28.125	0.000198536	P0AES6, P0ABQ0, P77475, P20083, P51020, P0A6A6, P30125, P00968, P07395, P0A6P7, P06960, P45578, P60757, P42641, P05793, P09831, P45579, P30137, P77247, P06988, P06987, P77366, P77625, P0AG16, P31467, P10442, P15640, P04391, P0ABF6, P0AD61, P0ABU2, P00895, P0A8M3, P0A9S5, P21599, P08312	128	629	4139	1.85071	0.0233512	0.00118129	0.000923192
INTERPRO	IPR020568:Ribosomal protein S5 domain 2-type fold	6	4.6875	0.000255161	P0AES6, P06987, P0A7Y8, P00547, P20083, P62615	128	19	3956	9.75987	0.0954259	0.016713	0.0159476
UP_KEYWORDS	Aminotransferase	6	4.6875	0.000269048	P77434, P77581, P77806, P0A959, P18335, P42588	128	20	4139	9.70078	0.0315138	0.00145914	0.00114034
UP_KEYWORDS	Leucine biosynthesis	4	3.125	0.000269757	P30126, P09151, P0A6A6, P30125	128	5	4139	25.8687	0.0315955	0.00145914	0.00114034
UP_SEQ_FEATURE	binding site:Substrate	14	10.9375	0.000295263	P0A6D5, P06988, P0ABQ0, P0AG18, P0A6C8, P30125, P0A799, P15770, P60340, P0AD61, P08244, P0A959, P0A9S5, P21599	128	140	4147	3.23984	0.0708929	0.0738157	0.0729299
INTERPRO	IPR011060:Ribulose-phosphate binding barrel	5	3.90625	0.000410593	P0A877, P10371, P08244, P60664, P00909	128	12	3956	12.8776	0.149045	0.0217953	0.0207971
GOTERM_MF_DIRECT	GO:0005524~ATP binding	32	25	0.000426948	P0AES6, P0A6E4, P0A809, P20083, P0A9Z1, P26281, P0A6C8, P0A799, P00968, P00547, P00963, P07395, P62615, P08660, P60757, P00561, P0A812, P00562, P06989, P0A6F1, P11875, P0A7D7, P0A8F8, P0A7B5, P15640, P0AGJ9, P0AD61, P08178, P0ABU2, P0A8M3, P21599, P08312	126	433	3186	1.86869	0.0747775	0.0155409	0.0151139
INTERPRO	IPR015422:Pyridoxal phosphate-dependent transferase, major region, subdomain 2	7	5.46875	0.000443671	P77434, P0A853, P77581, P77806, P0A959, P18335, P42588	128	32	3956	6.76074	0.16004	0.0217953	0.0207971
INTERPRO	IPR002912:ACT domain	5	3.90625	0.000578416	P0A9J8, P0ADF8, P08660, P00894, P00561	128	13	3956	11.887	0.203385	0.0252575	0.0241007
INTERPRO	IPR014721:Ribosomal protein S5 domain 2-type fold, subgroup	5	3.90625	0.00078978	P0AES6, P0A7Y8, P00547, P20083, P62615	128	14	3956	11.0379	0.266924	0.0310384	0.0296168
GOTERM_BP_DIRECT	GO:0006541~glutamine metabolic process	5	3.90625	0.000811546	P00903, P00904, P60595, P0A6F1, P0AG16	127	12	3277	10.7513	0.126084	0.0149685	0.0139766
INTERPRO	IPR023198:Phosphoglycolate phosphatase, domain 2	4	3.125	0.00102907	P77247, P77366, P77625, P31467	128	7	3956	17.6607	0.332777	0.0367657	0.0350818
UP_KEYWORDS	Schiff base	5	3.90625	0.00115529	P30139, P32669, P0A870, P78055, P0A867	128	16	4139	10.105	0.128517	0.00597739	0.0046714
UP_SEQ_FEATURE	domain:Glutamine amidotransferase type-1	4	3.125	0.00140356	P00903, P00904, P60595, P0A6F1	128	8	4147	16.1992	0.295123	0.170998	0.168946
INTERPRO	IPR015424:Pyridoxal phosphate-dependent transferase	7	5.46875	0.00152275	P77434, P0A853, P77581, P77806, P0A959, P18335, P42588	128	40	3956	5.40859	0.450582	0.0451386	0.0430712
INTERPRO	IPR015421:Pyridoxal phosphate-dependent transferase, major region, subdomain 1	7	5.46875	0.00152275	P77434, P0A853, P77581, P77806, P0A959, P18335, P42588	128	40	3956	5.40859	0.450582	0.0451386	0.0430712
INTERPRO	IPR017926:Glutamine amidotransferase	4	3.125	0.00160799	P00903, P00904, P60595, P0A6F1	128	8	3956	15.4531	0.468711	0.0451386	0.0430712
GOTERM_BP_DIRECT	GO:0009088~threonine biosynthetic process	4	3.125	0.00173467	P00934, P00547, P00561, P00562	127	7	3277	14.7447	0.250392	0.0261777	0.0244431
GOTERM_BP_DIRECT	GO:0044205~'de novo' UMP biosynthetic process	4	3.125	0.00173467	P0A7E3, P00968, P0A6F1, P08244	127	7	3277	14.7447	0.250392	0.0261777	0.0244431
INTERPRO	IPR023214:HAD-like domain	6	4.6875	0.00201364	P77247, P06987, P77475, P77366, P77625, P31467	128	29	3956	6.3944	0.547134	0.0527574	0.050341
INTERPRO	IPR001926:Tryptophan synthase beta subunit-like PLP-dependent enzymes superfamily	4	3.125	0.00235564	P00934, P16703, P0ABK5, P0A879	128	9	3956	13.7361	0.604206	0.0562102	0.0536357
KEGG_PATHWAY	eco00660:C5-Branched dibasic acid metabolism	5	3.90625	0.00264075	P30126, P0ADF8, P0A6A6, P00894, P30125	103	10	1564	7.59223	0.137636	0.0147882	0.0116193
UP_SEQ_FEATURE	region of interest:Aspartokinase	3	2.34375	0.00273597	P08660, P00561, P00562	128	3	4147	32.3984	0.494492	0.170998	0.168946
UP_SEQ_FEATURE	region of interest:Interface	3	2.34375	0.00273597	P08660, P00561, P00562	128	3	4147	32.3984	0.494492	0.170998	0.168946
UP_KEYWORDS	Proline biosynthesis	3	2.34375	0.00274645	P0A9L8, P07004, P0A7B5	128	3	4139	32.3359	0.279116	0.0136178	0.0106425
KEGG_PATHWAY	eco00250:Alanine, aspartate and glutamate metabolism	8	6.25	0.00292291	P0A6E4, P00968, P0A6F1, P00963, P11447, P0A959, P0AG16, P09831	103	31	1564	3.91857	0.151192	0.0148803	0.0116916
INTERPRO	IPR000312:Glycosyl transferase, family 3	3	2.34375	0.0030036	P00904, P07650, P30177	128	3	3956	30.9062	0.693394	0.0562102	0.0536357
INTERPRO	IPR015867:Nitrogen regulatory protein PII/ATP phosphoribosyltransferase, C-terminal	3	2.34375	0.0030036	P0AC55, P0A9Z1, P60757	128	3	3956	30.9062	0.693394	0.0562102	0.0536357
INTERPRO	IPR017459:Glycosyl transferase family 3, N-terminal domain	3	2.34375	0.0030036	P00904, P07650, P30177	128	3	3956	30.9062	0.693394	0.0562102	0.0536357
INTERPRO	IPR001341:Aspartate kinase domain	3	2.34375	0.0030036	P08660, P00561, P00562	128	3	3956	30.9062	0.693394	0.0562102	0.0536357
INTERPRO	IPR018042:Aspartate kinase, conserved site	3	2.34375	0.0030036	P08660, P00561, P00562	128	3	3956	30.9062	0.693394	0.0562102	0.0536357
UP_KEYWORDS	Pyrimidine biosynthesis	4	3.125	0.00388654	P0A7E3, P00968, P0A6F1, P08244	128	11	4139	11.7585	0.370858	0.0184999	0.0144579
GOTERM_BP_DIRECT	GO:0009098~leucine biosynthetic process	4	3.125	0.00393366	P30126, P09151, P0A6A6, P30125	127	9	3277	11.4681	0.480182	0.0544157	0.0508098
UP_KEYWORDS	Isomerase	10	7.8125	0.00425461	P0A9J8, P0AES6, P10371, P60340, P20083, P77366, P0A7Z0, P07023, P0AG18, P00909	128	104	4139	3.10922	0.397929	0.019473	0.0152184
GOTERM_BP_DIRECT	GO:0055129~L-proline biosynthetic process	3	2.34375	0.00429021	P0A9L8, P07004, P0A7B5	127	3	3277	25.8031	0.510175	0.0547827	0.0511525
GOTERM_MF_DIRECT	GO:0004585~ornithine carbamoyltransferase activity	3	2.34375	0.00446443	Q46803, P04391, P06960	126	3	3186	25.2857	0.557071	0.116075	0.112886
GOTERM_MF_DIRECT	GO:0004049~anthranilate synthase activity	3	2.34375	0.00446443	P00903, P00904, P00895	126	3	3186	25.2857	0.557071	0.116075	0.112886
GOTERM_CC_DIRECT	GO:0005950~anthranilate synthase complex	3	2.34375	0.00450875	P00903, P00904, P00895	117	3	2941	25.1368	0.118853	0.0420817	0.0420817
UP_SEQ_FEATURE	active site:For GATase activity	3	2.34375	0.0053622	P00904, P0AG16, P09831	128	4	4147	24.2988	0.737835	0.232739	0.229946
UP_KEYWORDS	Aminoacyl-tRNA synthetase	5	3.90625	0.00557756	P0AGJ9, P07395, P0A8M3, P11875, P08312	128	24	4139	6.73665	0.486029	0.0245826	0.0192116
UP_SEQ_FEATURE	active site:Nucleophile	8	6.25	0.00558574	P77247, P60595, P60340, P77475, P0A6F1, P77625, P31467, P0A879	128	71	4147	3.65053	0.752105	0.232739	0.229946
INTERPRO	IPR006132:Aspartate/ornithine carbamoyltransferase, carbamoyl-P binding	3	2.34375	0.00588091	Q46803, P04391, P06960	128	4	3956	23.1797	0.901532	0.0924479	0.0882136
INTERPRO	IPR006130:Aspartate/ornithine carbamoyltransferase	3	2.34375	0.00588091	Q46803, P04391, P06960	128	4	3956	23.1797	0.901532	0.0924479	0.0882136
INTERPRO	IPR006131:Aspartate/ornithine carbamoyltransferase, Asp/Orn-binding domain	3	2.34375	0.00588091	Q46803, P04391, P06960	128	4	3956	23.1797	0.901532	0.0924479	0.0882136
INTERPRO	IPR011322:Nitrogen regulatory PII-like, alpha/beta	3	2.34375	0.00588091	P0AC55, P0A9Z1, P60757	128	4	3956	23.1797	0.901532	0.0924479	0.0882136
GOTERM_BP_DIRECT	GO:0009423~chorismate biosynthetic process	4	3.125	0.0073023	P0A6D5, P15770, P07639, P12008	127	11	3277	9.38296	0.703773	0.0808122	0.0754571
GOTERM_BP_DIRECT	GO:0046654~tetrahydrofolate biosynthetic process	4	3.125	0.0073023	P00903, P05041, P26281, P0AEZ1	127	11	3277	9.38296	0.703773	0.0808122	0.0754571
GOTERM_BP_DIRECT	GO:0009090~homoserine biosynthetic process	3	2.34375	0.00836448	P08660, P00561, P00562	127	4	3277	19.3524	0.752004	0.082702	0.0772217
GOTERM_MF_DIRECT	GO:0042802~identical protein binding	20	15.625	0.0085755	P76256, P06987, P0AC55, P0A9Z1, P12008, P0AG16, P18335, P0A853, P0A873, P0ABH7, P0ABF6, P0AD61, P07395, P77581, P0A9S5, P21599, P0A879, P45579, P04036, P42588	126	272	3186	1.85924	0.791428	0.175926	0.171093
GOTERM_MF_DIRECT	GO:0004072~aspartate kinase activity	3	2.34375	0.00869962	P08660, P00561, P00562	126	4	3186	18.9643	0.796127	0.175926	0.171093
UP_KEYWORDS	Threonine biosynthesis	3	2.34375	0.00879104	P00934, P00547, P00561	128	5	4139	19.4016	0.650328	0.0373619	0.0291988
KEGG_PATHWAY	eco00270:Cysteine and methionine metabolism	7	5.46875	0.00921295	P07623, P16703, P08660, P45578, P0ABK5, P00561, P00562	103	29	1564	3.66522	0.404478	0.0429938	0.0337808
GOTERM_BP_DIRECT	GO:0009082~branched-chain amino acid biosynthetic process	4	3.125	0.00946589	P30126, P09151, P0A6A6, P30125	127	12	3277	8.60105	0.793782	0.082702	0.0772217
GOTERM_BP_DIRECT	GO:0006207~'de novo' pyrimidine nucleobase biosynthetic process	4	3.125	0.00946589	P0A7E3, Q46803, P0A6F1, P08244	127	12	3277	8.60105	0.793782	0.082702	0.0772217
GOTERM_BP_DIRECT	GO:0009089~lysine biosynthetic process via diaminopimelate	4	3.125	0.00946589	P08660, P00561, P04036, P00562	127	12	3277	8.60105	0.793782	0.082702	0.0772217
UP_SEQ_FEATURE	nucleotide phosphate-binding region:GTP	5	3.90625	0.00971373	P0ABU2, P60785, P0A6P7, P42641, P0AGD7	128	28	4147	5.78544	0.912011	0.346919	0.342756
UP_KEYWORDS	Protein biosynthesis	6	4.6875	0.0104638	P0AGJ9, P60785, P07395, P0A8M3, P11875, P08312	128	44	4139	4.40945	0.713998	0.0429378	0.0335564
KEGG_PATHWAY	eco00300:Lysine biosynthesis	5	3.90625	0.0133142	P08660, P00561, P18335, P04036, P00562	103	15	1564	5.06149	0.527919	0.0573535	0.0450635
GOTERM_BP_DIRECT	GO:0044238~primary metabolic process	3	2.34375	0.013591	Q46803, P04391, P06960	127	5	3277	15.4819	0.896851	0.112806	0.105331
GOTERM_MF_DIRECT	GO:0080146~L-cysteine desulfhydrase activity	3	2.34375	0.0141283	P0A853, P16703, P0ABK5	126	5	3186	15.1714	0.924956	0.257134	0.25007
UP_SEQ_FEATURE	metal ion-binding site:Magnesium	7	5.46875	0.0169996	P30137, P0ABU2, P0AD61, P07395, P21599, P0AG16, P08312	128	68	4147	3.33513	0.986008	0.490727	0.484838
UP_SEQ_FEATURE	domain:ACT	3	2.34375	0.0176662	P0ADF8, P08660, P00894	128	7	4147	13.885	0.988183	0.490727	0.484838
INTERPRO	IPR005814:Aminotransferase class-III	3	2.34375	0.0193184	P77581, P18335, P42588	128	7	3956	13.2455	0.999532	0.292005	0.278631
GOTERM_MF_DIRECT	GO:0030145~manganese ion binding	7	5.46875	0.0228098	P15640, P06988, P51020, P77625, P31467, P30125, P10442	126	57	3186	3.10526	0.984996	0.377399	0.36703
KEGG_PATHWAY	eco00261:Monobactam biosynthesis	4	3.125	0.0230883	P08660, P00561, P04036, P00562	103	10	1564	6.07379	0.729667	0.091183	0.0716438
UP_KEYWORDS	Folate biosynthesis	3	2.34375	0.0231709	P00903, P05041, P26281	128	8	4139	12.126	0.938566	0.0919114	0.0718299
UP_SEQ_FEATURE	metal ion-binding site:Zinc; catalytic	4	3.125	0.0249304	P0ABF6, P0A8M3, P0A9S5, P45579	128	21	4147	6.17113	0.998138	0.559524	0.552809
GOTERM_MF_DIRECT	GO:0051287~NAD binding	6	4.6875	0.0250185	P0A6D5, P06988, P76251, P11446, P30125, P04036	126	43	3186	3.52824	0.990061	0.379447	0.369023
KEGG_PATHWAY	eco00790:Folate biosynthesis	5	3.90625	0.0256597	P00903, P30749, P05041, P26281, P0A738	103	18	1564	4.21791	0.766764	0.091183	0.0716438
UP_KEYWORDS	Glycosyltransferase	6	4.6875	0.0256792	P0A7E3, P00904, P07650, P60757, P30177, P0AG16	128	55	4139	3.52756	0.954759	0.0985751	0.0770376
KEGG_PATHWAY	eco00260:Glycine, serine and threonine metabolism	7	5.46875	0.0260523	P0A877, P00934, P00547, P08660, P00561, P0A879, P00562	103	36	1564	2.95254	0.771968	0.091183	0.0716438
GOTERM_MF_DIRECT	GO:0000166~nucleotide binding	5	3.90625	0.0280826	P0A6D5, P15770, P0AC55, P00968, O32583	126	30	3186	4.21429	0.994395	0.393156	0.382355
UP_SEQ_FEATURE	binding site:Substrate; via amide nitrogen	4	3.125	0.0282355	P0AD61, P08244, P0A959, P21599	128	22	4147	5.89062	0.999201	0.559524	0.552809
UP_KEYWORDS	Acetylation	8	6.25	0.0283538	P0A799, P0A853, P0AGJ9, P0ABH7, P15639, P0AD61, P0A8M3, P21599	128	97	4139	2.66688	0.967381	0.102199	0.0798701
UP_KEYWORDS	Kinase	11	8.59375	0.0289675	P0A799, P00547, P0AD61, P62615, P26281, P08660, P0A6C8, P21599, P00561, P0A7B5, P00562	128	165	4139	2.15573	0.969743	0.102199	0.0798701
UP_SEQ_FEATURE	region of interest:Pyridoxal phosphate binding	3	2.34375	0.0290952	P16703, P0ABK5, P18335	128	9	4147	10.7995	0.999359	0.559524	0.552809
UP_SEQ_FEATURE	binding site:Pyridoxal phosphate	3	2.34375	0.0290952	P16703, P0ABK5, P18335	128	9	4147	10.7995	0.999359	0.559524	0.552809
UP_KEYWORDS	Lysine biosynthesis	3	2.34375	0.0291998	P08660, P18335, P04036	128	9	4139	10.7786	0.970593	0.102199	0.0798701
GOTERM_MF_DIRECT	GO:0016791~phosphatase activity	4	3.125	0.031261	P77247, P77475, P77366, P31467	126	18	3186	5.61905	0.996912	0.406393	0.395229
INTERPRO	IPR006073:GTP binding domain	3	2.34375	0.0317551	P0ABU2, P0A6P7, P42641	128	9	3956	10.3021	0.999997	0.340788	0.325179
UP_SEQ_FEATURE	binding site:NAD	4	3.125	0.0394714	P0A6D5, P06988, P15770, P0A9S5	128	25	4147	5.18375	0.999956	0.628317	0.620777
UP_KEYWORDS	Thiamine biosynthesis	3	2.34375	0.0428638	P30137, P30139, O32583	128	11	4139	8.81889	0.994557	0.141958	0.110942
UP_KEYWORDS	Manganese	7	5.46875	0.0429453	P15640, P00968, P51020, P76251, P31467, P30125, P10442	128	84	4139	2.69466	0.994611	0.141958	0.110942
INTERPRO	IPR016040:NAD(P)-binding domain	9	7.03125	0.0443883	P0A6D5, P0A9L8, P15770, P07023, P11446, P05793, P00561, P04036, P00562	128	124	3956	2.2432	1	0.340788	0.325179
INTERPRO	IPR006195:Aminoacyl-tRNA synthetase, class II	3	2.34375	0.0465296	P00963, P0A8M3, P08312	128	11	3956	8.42898	1	0.340788	0.325179
UP_KEYWORDS	Zinc	11	8.59375	0.0497299	P77247, P06988, P06987, P07639, P04391, P0ABF6, P0A8M3, P06960, P0A9S5, P77625, P45579	128	181	4139	1.96517	0.997689	0.159942	0.124997
GOTERM_BP_DIRECT	GO:0046656~folic acid biosynthetic process	3	2.34375	0.0539273	P00903, P05041, P26281	127	10	3277	7.74094	0.999899	0.391306	0.365376
UP_SEQ_FEATURE	mutagenesis site	18	14.0625	0.054664	P0A6D5, P0A6C5, P0ABQ0, P0A6C8, P0A8F8, P0AGA2, P00903, P0A853, P0AGJ9, P0A873, P0ABH7, P60340, P60664, P62615, P0A8M3, P78055, P42641, P0A738	128	368	4147	1.58471	0.999999	0.628317	0.620777
UP_KEYWORDS	NAD	9	7.03125	0.0600695	P0A6D5, P06988, P07639, P76251, P07023, P0A9S5, P0AEZ1, P30125, P04036	128	138	4139	2.10887	0.999371	0.188112	0.147012
UP_SEQ_FEATURE	chain:Quinate/shikimate dehydrogenase	2	1.5625	0.0603184	P0A6D5, P15770	128	2	4147	32.3984	1	0.628317	0.620777
UP_SEQ_FEATURE	region of interest:Ornithine binding	2	1.5625	0.0603184	P04391, P06960	128	2	4147	32.3984	1	0.628317	0.620777
UP_SEQ_FEATURE	chain:Succinylornithine transaminase	2	1.5625	0.0603184	P77581, P18335	128	2	4147	32.3984	1	0.628317	0.620777
UP_SEQ_FEATURE	site:Important for structural integrity	2	1.5625	0.0603184	P04391, P06960	128	2	4147	32.3984	1	0.628317	0.620777
UP_SEQ_FEATURE	chain:Ornithine carbamoyltransferase	2	1.5625	0.0603184	P04391, P06960	128	2	4147	32.3984	1	0.628317	0.620777
UP_SEQ_FEATURE	binding site:Carbamoyl phosphate	2	1.5625	0.0603184	P04391, P06960	128	2	4147	32.3984	1	0.628317	0.620777
UP_SEQ_FEATURE	region of interest:Carbamoyl phosphate binding	2	1.5625	0.0603184	P04391, P06960	128	2	4147	32.3984	1	0.628317	0.620777
UP_SEQ_FEATURE	domain:Chorismate mutase	2	1.5625	0.0603184	P0A9J8, P07023	128	2	4147	32.3984	1	0.628317	0.620777
UP_SEQ_FEATURE	region of interest:Homoserine dehydrogenase	2	1.5625	0.0603184	P00561, P00562	128	2	4147	32.3984	1	0.628317	0.620777
INTERPRO	IPR019811:Homoserine dehydrogenase, conserved site	2	1.5625	0.0631835	P00561, P00562	128	2	3956	30.9062	1	0.340788	0.325179
INTERPRO	IPR002332:Nitrogen regulatory protein P-II, urydylation site	2	1.5625	0.0631835	P0AC55, P0A9Z1	128	2	3956	30.9062	1	0.340788	0.325179
INTERPRO	IPR002292:Ornithine/putrescine carbamoyltransferase	2	1.5625	0.0631835	P04391, P06960	128	2	3956	30.9062	1	0.340788	0.325179
INTERPRO	IPR020822:Chorismate mutase, type II	2	1.5625	0.0631835	P0A9J8, P07023	128	2	3956	30.9062	1	0.340788	0.325179
INTERPRO	IPR001697:Pyruvate kinase	2	1.5625	0.0631835	P0AD61, P21599	128	2	3956	30.9062	1	0.340788	0.325179
INTERPRO	IPR017652:Acetyl/Succinylornithine transaminase family, bacteria	2	1.5625	0.0631835	P77581, P18335	128	2	3956	30.9062	1	0.340788	0.325179
INTERPRO	IPR005106:Aspartate/homoserine dehydrogenase, NAD-binding	2	1.5625	0.0631835	P00561, P00562	128	2	3956	30.9062	1	0.340788	0.325179
INTERPRO	IPR015806:Pyruvate kinase, beta-barrel insert domain	2	1.5625	0.0631835	P0AD61, P21599	128	2	3956	30.9062	1	0.340788	0.325179
INTERPRO	IPR002701:Chorismate mutase	2	1.5625	0.0631835	P0A9J8, P07023	128	2	3956	30.9062	1	0.340788	0.325179
INTERPRO	IPR015793:Pyruvate kinase, barrel	2	1.5625	0.0631835	P0AD61, P21599	128	2	3956	30.9062	1	0.340788	0.325179
INTERPRO	IPR016142:Citrate synthase-like, large alpha subdomain	2	1.5625	0.0631835	P0ABH7, P31660	128	2	3956	30.9062	1	0.340788	0.325179
INTERPRO	IPR004636:Transaminase, Acetylornithine/Succinylornithine family	2	1.5625	0.0631835	P77581, P18335	128	2	3956	30.9062	1	0.340788	0.325179
INTERPRO	IPR006062:Histidine biosynthesis	2	1.5625	0.0631835	P10371, P60664	128	2	3956	30.9062	1	0.340788	0.325179
INTERPRO	IPR002020:Citrate synthase-like	2	1.5625	0.0631835	P0ABH7, P31660	128	2	3956	30.9062	1	0.340788	0.325179
INTERPRO	IPR002187:Nitrogen regulatory protein PII	2	1.5625	0.0631835	P0AC55, P0A9Z1	128	2	3956	30.9062	1	0.340788	0.325179
INTERPRO	IPR024904:Ornithine carbamoyltransferase	2	1.5625	0.0631835	P04391, P06960	128	2	3956	30.9062	1	0.340788	0.325179
INTERPRO	IPR010976:Beta-phosphoglucomutase hydrolase	2	1.5625	0.0631835	P77475, P77366	128	2	3956	30.9062	1	0.340788	0.325179
INTERPRO	IPR001216:Cysteine synthase/cystathionine beta-synthase P-phosphate-binding site	2	1.5625	0.0631835	P16703, P0ABK5	128	2	3956	30.9062	1	0.340788	0.325179
INTERPRO	IPR013708:Shikimate dehydrogenase substrate binding, N-terminal	2	1.5625	0.0631835	P0A6D5, P15770	128	2	3956	30.9062	1	0.340788	0.325179
INTERPRO	IPR013759:DNA topoisomerase, type IIA, central domain	2	1.5625	0.0631835	P0AES6, P20083	128	2	3956	30.9062	1	0.340788	0.325179
INTERPRO	IPR015794:Pyruvate kinase, alpha/beta	2	1.5625	0.0631835	P0AD61, P21599	128	2	3956	30.9062	1	0.340788	0.325179
INTERPRO	IPR015795:Pyruvate kinase, C-terminal	2	1.5625	0.0631835	P0AD61, P21599	128	2	3956	30.9062	1	0.340788	0.325179
INTERPRO	IPR002288:DNA gyrase B subunit, C-terminal	2	1.5625	0.0631835	P0AES6, P20083	128	2	3956	30.9062	1	0.340788	0.325179
INTERPRO	IPR022893:Shikimate, quinate/shikimate dehydrogenase	2	1.5625	0.0631835	P0A6D5, P15770	128	2	3956	30.9062	1	0.340788	0.325179
INTERPRO	IPR018522:DNA topoisomerase, type IIA, conserved site	2	1.5625	0.0631835	P0AES6, P20083	128	2	3956	30.9062	1	0.340788	0.325179
INTERPRO	IPR013506:DNA topoisomerase, type IIA, subunit B, domain 2	2	1.5625	0.0631835	P0AES6, P20083	128	2	3956	30.9062	1	0.340788	0.325179
INTERPRO	IPR011147:Bifunctional aspartokinase/homoserine dehydrogenase I	2	1.5625	0.0631835	P00561, P00562	128	2	3956	30.9062	1	0.340788	0.325179
INTERPRO	IPR019810:Citrate synthase active site	2	1.5625	0.0631835	P0ABH7, P31660	128	2	3956	30.9062	1	0.340788	0.325179
INTERPRO	IPR019999:Anthranilate synthase component I	2	1.5625	0.0631835	P05041, P00895	128	2	3956	30.9062	1	0.340788	0.325179
INTERPRO	IPR023001:Fructose-6-phosphate aldolase	2	1.5625	0.0631835	P32669, P78055	128	2	3956	30.9062	1	0.340788	0.325179
INTERPRO	IPR024176:Citrate synthase, bacterial-type	2	1.5625	0.0631835	P0ABH7, P31660	128	2	3956	30.9062	1	0.340788	0.325179
INTERPRO	IPR004731:Transaldolase 3A/3B	2	1.5625	0.0631835	P32669, P78055	128	2	3956	30.9062	1	0.340788	0.325179
INTERPRO	IPR017918:Nitrogen regulatory protein PII, conserved site	2	1.5625	0.0631835	P0AC55, P0A9Z1	128	2	3956	30.9062	1	0.340788	0.325179
INTERPRO	IPR001342:Homoserine dehydrogenase, catalytic	2	1.5625	0.0631835	P00561, P00562	128	2	3956	30.9062	1	0.340788	0.325179
INTERPRO	IPR005856:Cysteine synthase K/M	2	1.5625	0.0631835	P16703, P0ABK5	128	2	3956	30.9062	1	0.340788	0.325179
INTERPRO	IPR001241:DNA topoisomerase, type IIA	2	1.5625	0.0631835	P0AES6, P20083	128	2	3956	30.9062	1	0.340788	0.325179
INTERPRO	IPR004730:Transaldolase type 1	2	1.5625	0.0631835	P0A870, P0A867	128	2	3956	30.9062	1	0.340788	0.325179
INTERPRO	IPR000891:Pyruvate carboxyltransferase	2	1.5625	0.0631835	P09151, P51020	128	2	3956	30.9062	1	0.340788	0.325179
INTERPRO	IPR016143:Citrate synthase-like, small alpha subdomain	2	1.5625	0.0631835	P0ABH7, P31660	128	2	3956	30.9062	1	0.340788	0.325179
INTERPRO	IPR006221:Anthranilate synthase/para-aminobenzoate synthase like domain	2	1.5625	0.0631835	P00903, P00904	128	2	3956	30.9062	1	0.340788	0.325179
INTERPRO	IPR006805:Anthranilate synthase component I, N-terminal	2	1.5625	0.0631835	P05041, P00895	128	2	3956	30.9062	1	0.340788	0.325179
INTERPRO	IPR018209:Pyruvate kinase, active site	2	1.5625	0.0631835	P0AD61, P21599	128	2	3956	30.9062	1	0.340788	0.325179
INTERPRO	IPR004839:Aminotransferase, class I/classII	3	2.34375	0.0633015	P77434, P77806, P0A959	128	13	3956	7.13221	1	0.340788	0.325179
INTERPRO	IPR013816:ATP-grasp fold, subdomain 2	3	2.34375	0.0633015	P15640, P00968, P0A7D7	128	13	3956	7.13221	1	0.340788	0.325179
GOTERM_BP_DIRECT	GO:0009229~thiamine diphosphate biosynthetic process	3	2.34375	0.0642884	P30137, P30139, O32583	127	11	3277	7.03722	0.999984	0.391306	0.365376
SMART	SM00938:SM00938	2	1.5625	0.064619	P0AC55, P0A9Z1	27	2	792	29.3333	0.86521	0.572422	0.572422
SMART	SM00433:TOP2c	2	1.5625	0.064619	P0AES6, P20083	27	2	792	29.3333	0.86521	0.572422	0.572422
SMART	SM00830:SM00830	2	1.5625	0.064619	P0A9J8, P07023	27	2	792	29.3333	0.86521	0.572422	0.572422
GOTERM_MF_DIRECT	GO:0030955~potassium ion binding	3	2.34375	0.0666264	P0A853, P0AD61, P21599	126	11	3186	6.8961	0.999996	0.437601	0.425579
UP_KEYWORDS	Methionine biosynthesis	3	2.34375	0.0668209	P07623, P0AEZ1, P00562	128	14	4139	6.92913	0.999733	0.203889	0.159342
GOTERM_BP_DIRECT	GO:0016311~dephosphorylation	5	3.90625	0.0705866	P77247, P06987, P77475, P77625, P31467	127	41	3277	3.14673	0.999995	0.391306	0.365376
UP_KEYWORDS	Oxidoreductase	17	13.2812	0.0714944	P0A6D5, P0A9L8, P06988, P11446, P30125, P15770, P76251, P07023, P0A9S5, P07004, P05793, P0AEZ1, P00561, P09831, P45579, P04036, P00562	128	353	4139	1.55725	0.999853	0.212696	0.166225
KEGG_PATHWAY	eco00330:Arginine and proline metabolism	5	3.90625	0.0748424	P0A9L8, P77581, P07004, P0A7B5, P42588	103	25	1564	3.03689	0.987174	0.24654	0.19371
GOTERM_BP_DIRECT	GO:0009097~isoleucine biosynthetic process	3	2.34375	0.0752529	P0ADF8, P05793, P00894	127	12	3277	6.45079	0.999998	0.391306	0.365376
GOTERM_BP_DIRECT	GO:0009228~thiamine biosynthetic process	3	2.34375	0.0752529	P30137, P30139, O32583	127	12	3277	6.45079	0.999998	0.391306	0.365376
GOTERM_BP_DIRECT	GO:0009099~valine biosynthetic process	3	2.34375	0.0752529	P0ADF8, P05793, P00894	127	12	3277	6.45079	0.999998	0.391306	0.365376
GOTERM_BP_DIRECT	GO:0009113~purine nucleobase biosynthetic process	2	1.5625	0.0754325	P15640, P0AG16	127	2	3277	25.8031	0.999998	0.391306	0.365376
GOTERM_BP_DIRECT	GO:0006432~phenylalanyl-tRNA aminoacylation	2	1.5625	0.0754325	P07395, P08312	127	2	3277	25.8031	0.999998	0.391306	0.365376
GOTERM_BP_DIRECT	GO:0006571~tyrosine biosynthetic process	2	1.5625	0.0754325	P0A9J8, P07023	127	2	3277	25.8031	0.999998	0.391306	0.365376
GOTERM_BP_DIRECT	GO:0046417~chorismate metabolic process	2	1.5625	0.0754325	P0A9J8, P07023	127	2	3277	25.8031	0.999998	0.391306	0.365376
GOTERM_BP_DIRECT	GO:0043039~tRNA aminoacylation	2	1.5625	0.0754325	P0AGJ9, P0A8M3	127	2	3277	25.8031	0.999998	0.391306	0.365376
GOTERM_BP_DIRECT	GO:0019272~L-alanine biosynthetic process from pyruvate	2	1.5625	0.0754325	P77434, P0A959	127	2	3277	25.8031	0.999998	0.391306	0.365376
GOTERM_MF_DIRECT	GO:0004834~tryptophan synthase activity	2	1.5625	0.0769408	P0A877, P0A879	126	2	3186	25.2857	1	0.437601	0.425579
GOTERM_MF_DIRECT	GO:0046820~4-amino-4-deoxychorismate synthase activity	2	1.5625	0.0769408	P00903, P05041	126	2	3186	25.2857	1	0.437601	0.425579
GOTERM_MF_DIRECT	GO:0004743~pyruvate kinase activity	2	1.5625	0.0769408	P0AD61, P21599	126	2	3186	25.2857	1	0.437601	0.425579
GOTERM_MF_DIRECT	GO:0004764~shikimate 3-dehydrogenase (NADP+) activity	2	1.5625	0.0769408	P0A6D5, P15770	126	2	3186	25.2857	1	0.437601	0.425579
GOTERM_MF_DIRECT	GO:0008801~beta-phosphoglucomutase activity	2	1.5625	0.0769408	P77475, P77366	126	2	3186	25.2857	1	0.437601	0.425579
GOTERM_MF_DIRECT	GO:0004412~homoserine dehydrogenase activity	2	1.5625	0.0769408	P00561, P00562	126	2	3186	25.2857	1	0.437601	0.425579
GOTERM_MF_DIRECT	GO:0004826~phenylalanine-tRNA ligase activity	2	1.5625	0.0769408	P07395, P08312	126	2	3186	25.2857	1	0.437601	0.425579
GOTERM_MF_DIRECT	GO:0004106~chorismate mutase activity	2	1.5625	0.0769408	P0A9J8, P07023	126	2	3186	25.2857	1	0.437601	0.425579
GOTERM_MF_DIRECT	GO:0004088~carbamoyl-phosphate synthase (glutamine-hydrolyzing) activity	2	1.5625	0.0769408	P00968, P0A6F1	126	2	3186	25.2857	1	0.437601	0.425579
GOTERM_MF_DIRECT	GO:0004124~cysteine synthase activity	2	1.5625	0.0769408	P16703, P0ABK5	126	2	3186	25.2857	1	0.437601	0.425579
GOTERM_MF_DIRECT	GO:0003862~3-isopropylmalate dehydrogenase activity	2	1.5625	0.0769408	P76251, P30125	126	2	3186	25.2857	1	0.437601	0.425579
GOTERM_MF_DIRECT	GO:0004021~L-alanine:2-oxoglutarate aminotransferase activity	2	1.5625	0.0769408	P77434, P0A959	126	2	3186	25.2857	1	0.437601	0.425579
GOTERM_MF_DIRECT	GO:0004801~sedoheptulose-7-phosphate:D-glyceraldehyde-3-phosphate glyceronetransferase activity	2	1.5625	0.0769408	P0A870, P0A867	126	2	3186	25.2857	1	0.437601	0.425579
GOTERM_MF_DIRECT	GO:0003861~3-isopropylmalate dehydratase activity	2	1.5625	0.0769408	P30126, P0A6A6	126	2	3186	25.2857	1	0.437601	0.425579
GOTERM_MF_DIRECT	GO:0000107~imidazoleglycerol-phosphate synthase activity	2	1.5625	0.0769408	P60595, P60664	126	2	3186	25.2857	1	0.437601	0.425579
GOTERM_MF_DIRECT	GO:0004108~citrate (Si)-synthase activity	2	1.5625	0.0769408	P0ABH7, P31660	126	2	3186	25.2857	1	0.437601	0.425579
GOTERM_MF_DIRECT	GO:0097023~fructose 6-phosphate aldolase activity	2	1.5625	0.0769408	P32669, P78055	126	2	3186	25.2857	1	0.437601	0.425579
GOTERM_CC_DIRECT	GO:0005951~carbamoyl-phosphate synthase complex	2	1.5625	0.0773419	P00968, P0A6F1	117	2	2941	25.1368	0.895011	0.360929	0.360929
GOTERM_CC_DIRECT	GO:0009382~imidazoleglycerol-phosphate synthase complex	2	1.5625	0.0773419	P60595, P60664	117	2	2941	25.1368	0.895011	0.360929	0.360929
GOTERM_CC_DIRECT	GO:0009328~phenylalanine-tRNA ligase complex	2	1.5625	0.0773419	P07395, P08312	117	2	2941	25.1368	0.895011	0.360929	0.360929
INTERPRO	IPR013750:GHMP kinase, C-terminal domain	2	1.5625	0.0932735	P00547, P62615	128	3	3956	20.6042	1	0.469955	0.44843
INTERPRO	IPR019818:Isocitrate/isopropylmalate dehydrogenase, conserved site	2	1.5625	0.0932735	P76251, P30125	128	3	3956	20.6042	1	0.469955	0.44843
INTERPRO	IPR001804:Isocitrate and isopropylmalate dehydrogenases family	2	1.5625	0.0932735	P76251, P30125	128	3	3956	20.6042	1	0.469955	0.44843
INTERPRO	IPR011607:Methylglyoxal synthase-like domain	2	1.5625	0.0932735	P00968, P15639	128	3	3956	20.6042	1	0.469955	0.44843
INTERPRO	IPR006204:GHMP kinase N-terminal domain	2	1.5625	0.0932735	P00547, P62615	128	3	3956	20.6042	1	0.469955	0.44843
PIR_SUPERFAMILY	PIRSF001369:citrate synthase	2	1.5625	0.0935458	P0ABH7, P31660	35	2	710	20.2857	0.960879	1	1
PIR_SUPERFAMILY	PIRSF000727:bifunctional aspartokinase/homoserine dehydrogenase I	2	1.5625	0.0935458	P00561, P00562	35	2	710	20.2857	0.960879	1	1
GOTERM_MF_DIRECT	GO:0003924~GTPase activity	4	3.125	0.0947686	P60785, P0A6P7, P42641, P0AGD7	126	28	3186	3.61224	1	0.522663	0.508304
SMART	SM00851:SM00851	2	1.5625	0.0954037	P00968, P15639	27	3	792	19.5556	0.950609	0.572422	0.572422
SMART	SM01329:SM01329	2	1.5625	0.0954037	P76251, P30125	27	3	792	19.5556	0.950609	0.572422	0.572422

## Sheet: DAVID_Output_SD150
Spectral Depth 150; Nitrogen Regulatory Protein PII Module
Category	Term	Count	%	PValue	Genes	List Total	Pop Hits	Pop Total	Fold Enrichment	Bonferroni	Benjamini	FDR
INTERPRO	IPR002187:Nitrogen regulatory protein PII	2	66.6667	0.00101099	P0AC55, P0A9Z1	3	2	3956	1318.67	0.00805939	0.00269599	0.00269599
INTERPRO	IPR017918:Nitrogen regulatory protein PII, conserved site	2	66.6667	0.00101099	P0AC55, P0A9Z1	3	2	3956	1318.67	0.00805939	0.00269599	0.00269599
INTERPRO	IPR002332:Nitrogen regulatory protein P-II, urydylation site	2	66.6667	0.00101099	P0AC55, P0A9Z1	3	2	3956	1318.67	0.00805939	0.00269599	0.00269599
INTERPRO	IPR015867:Nitrogen regulatory protein PII/ATP phosphoribosyltransferase, C-terminal	2	66.6667	0.0015163	P0AC55, P0A9Z1	3	3	3956	879.111	0.0120662	0.0030326	0.0030326
INTERPRO	IPR011322:Nitrogen regulatory PII-like, alpha/beta	2	66.6667	0.00202148	P0AC55, P0A9Z1	3	4	3956	659.333	0.0160579	0.00323436	0.00323436
SMART	SM00938:SM00938	2	66.6667	0.00252525	P0AC55, P0A9Z1	2	2	792	396	0.00252525	0.00252525	0.00252525
GOTERM_MF_DIRECT	GO:0030234~enzyme regulator activity	2	66.6667	0.00439009	P0AC55, P0A9Z1	3	7	3186	303.429	0.0345858	0.0351207	0.0351207
UP_KEYWORDS	Phosphoprotein	2	66.6667	0.0655789	P0AC55, P0A9Z1	3	138	4139	19.9952	0.55689	0.630245	0.630245
Spectral Depth 150; Phosphatase activity Module
Category	Term	Count	%	PValue	Genes	List Total	Pop Hits	Pop Total	Fold Enrichment	Bonferroni	Benjamini	FDR
INTERPRO	IPR006439:HAD-superfamily hydrolase, subfamily IA, variant 1	5	100	2.06093e-11	P77247, P77475, P77366, P77625, P31467	5	10	3956	395.6	1.03047e-10	1.03047e-10	1.03047e-10
INTERPRO	IPR023214:HAD-like domain	5	100	2.33092e-09	P77247, P77475, P77366, P77625, P31467	5	29	3956	136.414	1.16546e-08	5.82729e-09	5.82729e-09
INTERPRO	IPR023198:Phosphoglycolate phosphatase, domain 2	4	80	1.35678e-08	P77247, P77366, P77625, P31467	5	7	3956	452.114	6.78391e-08	2.2613e-08	2.2613e-08
GOTERM_MF_DIRECT	GO:0016791~phosphatase activity	4	80	6.03998e-07	P77247, P77475, P77366, P31467	5	18	3186	141.6	6.03996e-06	6.03998e-06	6.03998e-06
GOTERM_BP_DIRECT	GO:0016311~dephosphorylation	4	80	7.2134e-06	P77247, P77475, P77625, P31467	5	41	3277	63.9415	4.32796e-05	3.6067e-05	3.6067e-05
GOTERM_MF_DIRECT	GO:0000287~magnesium ion binding	5	100	9.43581e-06	P77247, P77475, P77366, P77625, P31467	5	178	3186	17.8989	9.43541e-05	4.7179e-05	4.7179e-05
UP_KEYWORDS	Magnesium	5	100	1.30118e-05	P77247, P77475, P77366, P77625, P31467	5	250	4139	16.556	0.00013011	0.000130118	0.000117106
UP_SEQ_FEATURE	active site:Nucleophile	4	80	1.90108e-05	P77247, P77475, P77625, P31467	5	71	4147	46.7268	9.50502e-05	0.000114065	0.000114065
UP_KEYWORDS	Metal-binding	5	100	0.000529054	P77247, P77475, P77366, P77625, P31467	5	629	4139	6.58029	0.00527796	0.00264527	0.00238074
INTERPRO	IPR010976:Beta-phosphoglucomutase hydrolase	2	40	0.00202148	P77475, P77366	5	2	3956	791.2	0.0100666	0.00252685	0.00252685
GOTERM_MF_DIRECT	GO:0008801~beta-phosphoglucomutase activity	2	40	0.0025098	P77475, P77366	5	2	3186	637.2	0.0248165	0.00836601	0.00836601
UP_KEYWORDS	Hydrolase	4	80	0.00563335	P77247, P77475, P77625, P31467	5	479	4139	6.91273	0.0549267	0.0187778	0.0169
GOTERM_MF_DIRECT	GO:0050308~sugar-phosphatase activity	2	40	0.00751523	P77247, P77625	5	6	3186	212.4	0.0726611	0.0187881	0.0187881
GOTERM_CC_DIRECT	GO:0005737~cytoplasm	4	80	0.0217206	P77475, P77366, P77625, P31467	5	544	2941	4.325	0.0429693	0.0434411	0.0434411
GOTERM_MF_DIRECT	GO:0030145~manganese ion binding	2	40	0.0696974	P77625, P31467	5	57	3186	22.3579	0.51444	0.139395	0.139395
Spectral Depth 150; Nucleotide binding, tRNA binding and modification Module
Category	Term	Count	%	PValue	Genes	List Total	Pop Hits	Pop Total	Fold Enrichment	Bonferroni	Benjamini	FDR
UP_KEYWORDS	Nucleotide-binding	15	60	5.08931e-08	P0AES6, P0A809, P20083, P11875, P0A8F8, P0A799, P0AGJ9, P0ABU2, P60785, P07395, P0A6P7, P42641, P08312, P0A812, P0AGD7	25	486	4139	5.10988	3.15536e-06	3.15537e-06	2.69733e-06
UP_KEYWORDS	Cytoplasm	14	56	1.38723e-05	P76256, P0AES6, P0A809, P11875, P0A8F8, P10442, P0A799, P0AGJ9, P0A873, P07395, P42641, P08312, P0A812, P0AGD7	25	647	4139	3.58244	0.000859722	0.000430043	0.000367617
UP_SEQ_FEATURE	nucleotide phosphate-binding region:GTP	5	20	1.6112e-05	P0ABU2, P60785, P0A6P7, P42641, P0AGD7	25	28	4147	29.6214	0.00106283	0.0010795	0.0010795
UP_KEYWORDS	ATP-binding	11	44	4.66074e-05	P0A799, P0AES6, P0AGJ9, P0A809, P20083, P0ABU2, P07395, P11875, P08312, P0A812, P0A8F8	25	412	4139	4.42029	0.00288555	0.000963219	0.000823397
UP_KEYWORDS	Protein biosynthesis	5	20	0.000101152	P0AGJ9, P60785, P07395, P11875, P08312	25	44	4139	18.8136	0.00625212	0.00156786	0.00134027
INTERPRO	IPR027417:P-loop containing nucleoside triphosphate hydrolase	8	32	0.000278793	P28630, P0ABU2, P60785, P0A6P7, P42641, P0A812, P0AGD7, P0A8F8	25	227	3956	5.57674	0.0307465	0.0312248	0.029552
UP_KEYWORDS	Aminoacyl-tRNA synthetase	4	16	0.000320204	P0AGJ9, P07395, P11875, P08312	25	24	4139	27.5933	0.01966	0.00397053	0.00339416
GOTERM_MF_DIRECT	GO:0005524~ATP binding	11	44	0.00042398	P0A799, P0AES6, P0AGJ9, P0A809, P20083, P0ABU2, P07395, P11875, P08312, P0A812, P0A8F8	24	433	3186	3.3724	0.0189022	0.0107644	0.00908995
GOTERM_MF_DIRECT	GO:0005525~GTP binding	5	20	0.000478418	P0ABU2, P60785, P0A6P7, P42641, P0AGD7	24	53	3186	12.5236	0.0213038	0.0107644	0.00908995
UP_KEYWORDS	RNA-binding	6	24	0.000555548	P0A7Y8, P0AGJ9, P07395, P0A7L3, P42641, P0AGD7	25	122	4139	8.1423	0.0338668	0.00574067	0.00490735
GOTERM_CC_DIRECT	GO:0005829~cytosol	17	68	0.000772563	P76256, P0AES6, P20083, P11875, P0A799, P0AGJ9, P0A873, P60340, P60785, P07395, P0A6P7, P0A7L3, P42641, P08312, P0A812, P09831, P0AGD7	24	1033	2941	2.01666	0.0145771	0.0146787	0.0146787
GOTERM_MF_DIRECT	GO:0003924~GTPase activity	4	16	0.000957506	P60785, P0A6P7, P42641, P0AGD7	24	28	3186	18.9643	0.0421925	0.0142943	0.0120707
INTERPRO	IPR006073:GTP binding domain	3	12	0.00123752	P0ABU2, P0A6P7, P42641	25	9	3956	52.7467	0.1295	0.0693009	0.0655883
GOTERM_MF_DIRECT	GO:0000287~magnesium ion binding	7	28	0.0012706	P0AES6, P0A873, P20083, P07395, P0A6P7, P42641, P08312	24	178	3186	5.22051	0.0556074	0.0142943	0.0120707
UP_KEYWORDS	Magnesium	7	28	0.00244404	P0AES6, P20083, P0ABU2, P07395, P0A6P7, P42641, P08312	25	250	4139	4.63568	0.140768	0.0182566	0.0156064
UP_KEYWORDS	GTP-binding	4	16	0.00249737	P60785, P0A6P7, P42641, P0AGD7	25	48	4139	13.7967	0.143611	0.0182566	0.0156064
UP_KEYWORDS	tRNA processing	4	16	0.00265015	P76256, P0A7Y8, P0A873, P60340	25	49	4139	13.5151	0.151705	0.0182566	0.0156064
INTERPRO	IPR014721:Ribosomal protein S5 domain 2-type fold, subgroup	3	12	0.00307072	P0AES6, P0A7Y8, P20083	25	14	3956	33.9086	0.29139	0.11464	0.108499
GOTERM_BP_DIRECT	GO:0007059~chromosome segregation	3	12	0.00509353	P0AES6, P20083, P42641	25	15	3277	26.216	0.244866	0.27505	0.27505
INTERPRO	IPR020568:Ribosomal protein S5 domain 2-type fold	3	12	0.00566444	P0AES6, P0A7Y8, P20083	25	19	3956	24.9853	0.470711	0.150555	0.14249
UP_KEYWORDS	SOS response	3	12	0.00574522	P0A809, P0A812, P0A8F8	25	20	4139	24.834	0.300389	0.0356203	0.0304497
INTERPRO	IPR001241:DNA topoisomerase, type IIA	2	8	0.0120982	P0AES6, P20083	25	2	3956	158.24	0.744175	0.150555	0.14249
INTERPRO	IPR018522:DNA topoisomerase, type IIA, conserved site	2	8	0.0120982	P0AES6, P20083	25	2	3956	158.24	0.744175	0.150555	0.14249
INTERPRO	IPR013759:DNA topoisomerase, type IIA, central domain	2	8	0.0120982	P0AES6, P20083	25	2	3956	158.24	0.744175	0.150555	0.14249
INTERPRO	IPR002288:DNA gyrase B subunit, C-terminal	2	8	0.0120982	P0AES6, P20083	25	2	3956	158.24	0.744175	0.150555	0.14249
INTERPRO	IPR013506:DNA topoisomerase, type IIA, subunit B, domain 2	2	8	0.0120982	P0AES6, P20083	25	2	3956	158.24	0.744175	0.150555	0.14249
GOTERM_MF_DIRECT	GO:0004826~phenylalanine-tRNA ligase activity	2	8	0.0143883	P07395, P08312	24	2	3186	132.75	0.479089	0.129495	0.109351
GOTERM_BP_DIRECT	GO:0006432~phenylalanyl-tRNA aminoacylation	2	8	0.0145961	P07395, P08312	25	2	3277	131.08	0.554565	0.355266	0.355266
UP_KEYWORDS	Ligase	4	16	0.0153432	P0AGJ9, P07395, P11875, P08312	25	92	4139	7.19826	0.616591	0.08648	0.0739264
GOTERM_CC_DIRECT	GO:0009328~phenylalanine-tRNA ligase complex	2	8	0.0155824	P07395, P08312	24	2	2941	122.542	0.257993	0.148033	0.148033
GOTERM_MF_DIRECT	GO:0005515~protein binding	11	44	0.0190934	P76256, P0AES6, P28630, P0A7V0, P0ABU2, P07395, P42641, P08312, P0A812, P09831, P0A8F8	24	712	3186	2.05091	0.580005	0.138266	0.116758
GOTERM_BP_DIRECT	GO:0009432~SOS response	3	12	0.019737	P0A809, P0A812, P0A8F8	25	30	3277	13.108	0.665925	0.355266	0.355266
KEGG_PATHWAY	eco03440:Homologous recombination	3	12	0.0199167	P28630, P0A809, P0A812	14	27	1564	12.4127	0.317666	0.378417	0.378417
UP_KEYWORDS	Metal-binding	9	36	0.0210465	P0AES6, P20083, P0ABU2, P07395, P0A6P7, P42641, P08312, P09831, P10442	25	629	4139	2.3689	0.732546	0.10874	0.0929552
GOTERM_MF_DIRECT	GO:0009378~four-way junction helicase activity	2	8	0.021508	P0A809, P0A812	24	3	3186	88.5	0.624095	0.138266	0.116758
SMART	SM00433:TOP2c	2	8	0.0226123	P0AES6, P20083	10	2	792	79.2	0.290418	0.339185	0.339185
INTERPRO	IPR013760:DNA topoisomerase, type IIA-like domain	2	8	0.024056	P0AES6, P20083	25	4	3956	79.12	0.934599	0.269428	0.254994
GOTERM_MF_DIRECT	GO:0000049~tRNA binding	3	12	0.0270657	P0A7Y8, P07395, P08312	24	36	3186	11.0625	0.70909	0.142892	0.120665
GOTERM_MF_DIRECT	GO:0003918~DNA topoisomerase type II (ATP-hydrolyzing) activity	2	8	0.0285785	P0AES6, P20083	24	4	3186	66.375	0.728764	0.142892	0.120665
GOTERM_CC_DIRECT	GO:0009330~DNA topoisomerase complex (ATP-hydrolyzing)	2	8	0.0309324	P0AES6, P20083	24	4	2941	61.2708	0.449538	0.195905	0.195905
UP_KEYWORDS	Topoisomerase	2	8	0.034311	P0AES6, P20083	25	6	4139	55.1867	0.885208	0.163637	0.139883
INTERPRO	IPR006171:Toprim domain	2	8	0.0417331	P0AES6, P20083	25	7	3956	45.2114	0.991557	0.424919	0.402155
UP_KEYWORDS	Ribonucleoprotein	3	12	0.0423725	P0A7V0, P0A7L3, P0AGD7	25	57	4139	8.71368	0.931736	0.18765	0.16041
GOTERM_BP_DIRECT	GO:0000725~recombinational repair	2	8	0.0431782	P0A809, P0A812	25	6	3277	43.6933	0.911751	0.514527	0.514527
GOTERM_CC_DIRECT	GO:0048476~Holliday junction resolvase complex	2	8	0.0460533	P0A809, P0A812	24	6	2941	40.8472	0.59172	0.20341	0.20341
GOTERM_BP_DIRECT	GO:0006265~DNA topological change	2	8	0.0501986	P0AES6, P20083	25	7	3277	37.4514	0.941142	0.514527	0.514527
GOTERM_MF_DIRECT	GO:0003677~DNA binding	7	28	0.0515434	P0AES6, P28630, P0A809, P20083, P42641, P0A812, P0A8F8	24	387	3186	2.40116	0.907576	0.230624	0.194749
UP_KEYWORDS	DNA repair	3	12	0.0522302	P0A809, P0A812, P0A8F8	25	64	4139	7.76063	0.96406	0.20809	0.177883
INTERPRO	IPR001412:Aminoacyl-tRNA synthetase, class I, conserved site	2	8	0.0533469	P0AGJ9, P11875	25	9	3956	35.1644	0.997845	0.497904	0.471231
GOTERM_CC_DIRECT	GO:0005694~chromosome	2	8	0.0535289	P0AES6, P20083	24	7	2941	35.0119	0.648407	0.20341	0.20341
UP_KEYWORDS	DNA damage	3	12	0.0537006	P0A809, P0A812, P0A8F8	25	65	4139	7.64123	0.967358	0.20809	0.177883
GOTERM_MF_DIRECT	GO:0043023~ribosomal large subunit binding	2	8	0.0563747	P0ABU2, P60785	24	8	3186	33.1875	0.926552	0.230624	0.194749
GOTERM_BP_DIRECT	GO:0006268~DNA unwinding involved in DNA replication	2	8	0.0571696	P0AES6, P20083	25	8	3277	32.77	0.960749	0.514527	0.514527
UP_SEQ_FEATURE	metal ion-binding site:Magnesium	3	12	0.0580019	P0ABU2, P07395, P08312	25	68	4147	7.31824	0.980622	1	1
KEGG_PATHWAY	eco00970:Aminoacyl-tRNA biosynthesis	4	16	0.0589835	P0AGJ9, P07395, P11875, P08312	14	111	1564	4.02574	0.684973	0.560343	0.560343
UP_SEQ_FEATURE	short sequence motif:"HIGH" region	2	8	0.0619225	P0AGJ9, P11875	25	11	4147	30.16	0.985285	1	1
GOTERM_BP_DIRECT	GO:0032508~DNA duplex unwinding	2	8	0.0709649	P0A809, P0A812	25	10	3277	26.216	0.982551	0.547443	0.547443
GOTERM_BP_DIRECT	GO:0008033~tRNA processing	2	8	0.0912956	P0A7Y8, P07395	25	13	3277	20.1662	0.994833	0.616245	0.616245
Spectral Depth 150; Cysteine synthase Module
Category	Term	Count	%	PValue	Genes	List Total	Pop Hits	Pop Total	Fold Enrichment	Bonferroni	Benjamini	FDR
INTERPRO	IPR001216:Cysteine synthase/cystathionine beta-synthase P-phosphate-binding site	2	100	0.000505561	P16703, P0ABK5	2	2	3956	1978	0.00252525	0.0012639	0.0012639
INTERPRO	IPR005856:Cysteine synthase K/M	2	100	0.000505561	P16703, P0ABK5	2	2	3956	1978	0.00252525	0.0012639	0.0012639
GOTERM_MF_DIRECT	GO:0004124~cysteine synthase activity	2	100	0.000627746	P16703, P0ABK5	2	2	3186	1593	0.00376057	0.00376648	0.00376648
GOTERM_BP_DIRECT	GO:0006535~cysteine biosynthetic process from serine	2	100	0.00122063	P16703, P0ABK5	2	4	3277	819.25	0.00365742	0.00244126	0.00244126
GOTERM_MF_DIRECT	GO:0080146~L-cysteine desulfhydrase activity	2	100	0.00156937	P16703, P0ABK5	2	5	3186	637.2	0.00937933	0.0047081	0.0047081
UP_KEYWORDS	Cysteine biosynthesis	2	100	0.00169123	P16703, P0ABK5	2	7	4139	591.286	0.0101046	0.0101474	0.0101474
UP_SEQ_FEATURE	binding site:Pyridoxal phosphate	2	100	0.00217024	P16703, P0ABK5	2	9	4147	460.778	0.0108042	0.00651073	0.00651073
UP_SEQ_FEATURE	region of interest:Pyridoxal phosphate binding	2	100	0.00217024	P16703, P0ABK5	2	9	4147	460.778	0.0108042	0.00651073	0.00651073
INTERPRO	IPR001926:Tryptophan synthase beta subunit-like PLP-dependent enzymes superfamily	2	100	0.00227503	P16703, P0ABK5	2	9	3956	439.556	0.0113235	0.00379171	0.00379171
GOTERM_MF_DIRECT	GO:0016740~transferase activity	2	100	0.00721908	P16703, P0ABK5	2	23	3186	138.522	0.0425403	0.0144382	0.0144382
GOTERM_BP_DIRECT	GO:0008652~cellular amino acid biosynthetic process	2	100	0.0112908	P16703, P0ABK5	2	37	3277	88.5676	0.0334914	0.0112908	0.0112908
UP_KEYWORDS	Pyridoxal phosphate	2	100	0.0142547	P16703, P0ABK5	2	59	4139	70.1525	0.0825373	0.042764	0.042764
GOTERM_MF_DIRECT	GO:0030170~pyridoxal phosphate binding	2	100	0.0178908	P16703, P0ABK5	2	57	3186	55.8947	0.102656	0.0268362	0.0268362
KEGG_PATHWAY	eco00270:Cysteine and methionine metabolism	2	100	0.0185422	P16703, P0ABK5	2	29	1564	53.931	0.13906	0.148338	0.148338
UP_KEYWORDS	Amino-acid biosynthesis	2	100	0.0248852	P16703, P0ABK5	2	103	4139	40.1845	0.140325	0.0497705	0.0497705
KEGG_PATHWAY	eco01230:Biosynthesis of amino acids	2	100	0.0754476	P16703, P0ABK5	2	118	1564	13.2542	0.466109	0.30179	0.30179
Spectral Depth 150; Pyrimidine metabolism Module
Category	Term	Count	%	PValue	Genes	List Total	Pop Hits	Pop Total	Fold Enrichment	Bonferroni	Benjamini	FDR
KEGG_PATHWAY	eco00240:Pyrimidine metabolism	2	100	0.0396419	P0ABF6, P07650	2	62	1564	25.2258	0.0777124	0.0792839	0.0792839
Spectral Depth 150; Aminotransferase Module
Category	Term	Count	%	PValue	Genes	List Total	Pop Hits	Pop Total	Fold Enrichment	Bonferroni	Benjamini	FDR
INTERPRO	IPR004839:Aminotransferase, class I/classII	3	100	9.97061e-06	P77434, P77806, P0A959	3	13	3956	304.308	3.98819e-05	3.98824e-05	1.99412e-05
UP_KEYWORDS	Aminotransferase	3	100	2.2187e-05	P77434, P77806, P0A959	3	20	4139	206.95	8.87449e-05	8.87478e-05	4.43739e-05
INTERPRO	IPR015422:Pyridoxal phosphate-dependent transferase, major region, subdomain 2	3	100	6.34029e-05	P77434, P77806, P0A959	3	32	3956	123.625	0.000253587	9.97061e-05	6.34029e-05
INTERPRO	IPR015421:Pyridoxal phosphate-dependent transferase, major region, subdomain 1	3	100	9.97061e-05	P77434, P77806, P0A959	3	40	3956	98.9	0.000398765	9.97061e-05	9.97061e-05
INTERPRO	IPR015424:Pyridoxal phosphate-dependent transferase	3	100	9.97061e-05	P77434, P77806, P0A959	3	40	3956	98.9	0.000398765	9.97061e-05	9.97061e-05
UP_KEYWORDS	Pyridoxal phosphate	3	100	0.000199799	P77434, P77806, P0A959	3	59	4139	70.1525	0.000798958	0.000399599	0.000199799
GOTERM_MF_DIRECT	GO:0030170~pyridoxal phosphate binding	3	100	0.000314563	P77434, P77806, P0A959	3	57	3186	55.8947	0.00157183	0.00157282	0.00157282
GOTERM_BP_DIRECT	GO:0019272~L-alanine biosynthetic process from pyruvate	2	66.6667	0.00122044	P77434, P0A959	3	2	3277	1092.33	0.00851188	0.00488028	0.00488028
GOTERM_MF_DIRECT	GO:0004021~L-alanine:2-oxoglutarate aminotransferase activity	2	66.6667	0.0012553	P77434, P0A959	3	2	3186	1062	0.00626074	0.00313824	0.00313824
GOTERM_BP_DIRECT	GO:0006523~alanine biosynthetic process	2	66.6667	0.00183038	P77434, P0A959	3	3	3277	728.222	0.0127425	0.00488028	0.00488028
GOTERM_BP_DIRECT	GO:0030632~D-alanine biosynthetic process	2	66.6667	0.00244014	P77434, P0A959	3	4	3277	546.167	0.0169564	0.00488028	0.00488028
GOTERM_MF_DIRECT	GO:0008483~transaminase activity	2	66.6667	0.00501645	P77434, P0A959	3	8	3186	265.5	0.0248319	0.00836075	0.00836075
UP_KEYWORDS	Transferase	3	100	0.0186715	P77434, P77806, P0A959	3	566	4139	7.31272	0.0726201	0.0244034	0.0186715
UP_KEYWORDS	Cytoplasm	3	100	0.0244034	P77434, P77806, P0A959	3	647	4139	6.39722	0.0940983	0.0244034	0.0244034
GOTERM_CC_DIRECT	GO:0005737~cytoplasm	3	100	0.034163	P77434, P77806, P0A959	3	544	2941	5.40625	0.034163	0.034163	0.034163
Spectral Depth 150; Transaldolase
Category	Term	Count	%	PValue	Genes	List Total	Pop Hits	Pop Total	Fold Enrichment	Bonferroni	Benjamini	FDR
INTERPRO	IPR001585:Transaldolase	4	100	3.87946e-10	P32669, P0A870, P78055, P0A867	4	4	3956	989	2.32768e-09	1.16384e-09	3.87946e-10
INTERPRO	IPR018225:Transaldolase, active site	4	100	3.87946e-10	P32669, P0A870, P78055, P0A867	4	4	3956	989	2.32768e-09	1.16384e-09	3.87946e-10
UP_KEYWORDS	Schiff base	4	100	4.74207e-08	P32669, P0A870, P78055, P0A867	4	16	4139	258.688	2.84524e-07	2.84524e-07	9.48414e-08
INTERPRO	IPR013785:Aldolase-type TIM barrel	4	100	5.08152e-06	P32669, P0A870, P78055, P0A867	4	69	3956	57.3333	3.04887e-05	1.0163e-05	5.08152e-06
INTERPRO	IPR004730:Transaldolase type 1	2	50	0.0015163	P0A870, P0A867	4	2	3956	989	0.00906338	0.0015163	0.0015163
INTERPRO	IPR023001:Fructose-6-phosphate aldolase	2	50	0.0015163	P32669, P78055	4	2	3956	989	0.00906338	0.0015163	0.0015163
INTERPRO	IPR004731:Transaldolase 3A/3B	2	50	0.0015163	P32669, P78055	4	2	3956	989	0.00906338	0.0015163	0.0015163
GOTERM_MF_DIRECT	GO:0004801~sedoheptulose-7-phosphate:D-glyceraldehyde-3-phosphate glyceronetransferase activity	2	50	0.00188265	P0A870, P0A867	4	2	3186	796.5	0.00563732	0.00282397	0.00282397
GOTERM_MF_DIRECT	GO:0097023~fructose 6-phosphate aldolase activity	2	50	0.00188265	P32669, P78055	4	2	3186	796.5	0.00563732	0.00282397	0.00282397
GOTERM_BP_DIRECT	GO:0006000~fructose metabolic process	2	50	0.00274474	P32669, P78055	4	3	3277	546.167	0.0136486	0.010979	0.010979
UP_KEYWORDS	Pentose shunt	2	50	0.00362056	P0A870, P0A867	4	5	4139	413.9	0.0215277	0.00760948	0.00362056
UP_KEYWORDS	Cytoplasm	4	100	0.00380474	P32669, P0A870, P78055, P0A867	4	647	4139	6.39722	0.0226124	0.00760948	0.00380474
KEGG_PATHWAY	eco00030:Pentose phosphate pathway	2	50	0.0191816	P0A870, P0A867	2	30	1564	52.1333	0.126787	0.134271	0.0383632
GOTERM_BP_DIRECT	GO:0005975~carbohydrate metabolic process	2	50	0.0512949	P0A870, P0A867	4	57	3277	28.7456	0.231478	0.10259	0.10259
UP_KEYWORDS	Carbohydrate metabolism	2	50	0.056885	P32669, P78055	4	80	4139	25.8687	0.296299	0.0853274	0.056885
KEGG_PATHWAY	eco01200:Carbon metabolism	2	50	0.0684143	P0A870, P0A867	2	107	1564	14.6168	0.391081	0.176044	0.0684143
KEGG_PATHWAY	eco01230:Biosynthesis of amino acids	2	50	0.0754476	P0A870, P0A867	2	118	1564	13.2542	0.422541	0.176044	0.0754476
Spectral Depth 150; Shikimate Dehydrogenase Module
Category	Term	Count	%	PValue	Genes	List Total	Pop Hits	Pop Total	Fold Enrichment	Bonferroni	Benjamini	FDR
UP_SEQ_FEATURE	chain:Quinate/shikimate dehydrogenase	2	100	0.000482276	P0A6D5, P15770	2	2	4147	2073.5	0.00433212	0.00482276	0.00482276
INTERPRO	IPR022893:Shikimate, quinate/shikimate dehydrogenase	2	100	0.000505561	P0A6D5, P15770	2	2	3956	1978	0.00302954	0.00151668	0.00151668
INTERPRO	IPR013708:Shikimate dehydrogenase substrate binding, N-terminal	2	100	0.000505561	P0A6D5, P15770	2	2	3956	1978	0.00302954	0.00151668	0.00151668
GOTERM_MF_DIRECT	GO:0004764~shikimate 3-dehydrogenase (NADP+) activity	2	100	0.000627746	P0A6D5, P15770	2	2	3186	1593	0.00438596	0.00439422	0.00439422
UP_SEQ_FEATURE	binding site:NAD; via amide nitrogen	2	100	0.00144683	P0A6D5, P15770	2	6	4147	691.167	0.0129464	0.00723415	0.00723415
GOTERM_BP_DIRECT	GO:0009423~chorismate biosynthetic process	2	100	0.00335673	P0A6D5, P15770	2	11	3277	297.909	0.0166713	0.0085444	0.0085444
GOTERM_BP_DIRECT	GO:0009073~aromatic amino acid family biosynthetic process	2	100	0.0042722	P0A6D5, P15770	2	14	3277	234.071	0.0211793	0.0085444	0.0085444
UP_KEYWORDS	Aromatic amino acid biosynthesis	2	100	0.00507369	P0A6D5, P15770	2	21	4139	197.095	0.0251123	0.0253684	0.0253684
UP_SEQ_FEATURE	binding site:NAD	2	100	0.00602845	P0A6D5, P15770	2	25	4147	165.88	0.052966	0.0200948	0.0200948
GOTERM_MF_DIRECT	GO:0050661~NADP binding	2	100	0.00753296	P0A6D5, P15770	2	24	3186	132.75	0.0515539	0.0219711	0.0219711
GOTERM_MF_DIRECT	GO:0000166~nucleotide binding	2	100	0.0094162	P0A6D5, P15770	2	30	3186	106.2	0.0640804	0.0219711	0.0219711
GOTERM_BP_DIRECT	GO:0008652~cellular amino acid biosynthetic process	2	100	0.0112908	P0A6D5, P15770	2	37	3277	88.5676	0.0551936	0.0150544	0.0150544
UP_SEQ_FEATURE	nucleotide phosphate-binding region:NAD	2	100	0.0130215	P0A6D5, P15770	2	54	4147	76.7963	0.111271	0.0325537	0.0325537
KEGG_PATHWAY	eco00400:Phenylalanine, tyrosine and tryptophan biosynthesis	2	100	0.0134271	P0A6D5, P15770	2	21	1564	74.4762	0.0653567	0.0671355	0.0671355
UP_KEYWORDS	NADP	2	100	0.0217444	P0A6D5, P15770	2	90	4139	45.9889	0.104095	0.0414754	0.0414754
UP_KEYWORDS	Amino-acid biosynthesis	2	100	0.0248852	P0A6D5, P15770	2	103	4139	40.1845	0.118386	0.0414754	0.0414754
UP_SEQ_FEATURE	active site:Proton acceptor	2	100	0.0260429	P0A6D5, P15770	2	108	4147	38.3981	0.211397	0.0520858	0.0520858
INTERPRO	IPR016040:NAD(P)-binding domain	2	100	0.0313448	P0A6D5, P15770	2	124	3956	31.9032	0.173933	0.0626896	0.0626896
UP_SEQ_FEATURE	binding site:Substrate	2	100	0.0337593	P0A6D5, P15770	2	140	4147	29.6214	0.265879	0.0562656	0.0562656
UP_KEYWORDS	Oxidoreductase	2	100	0.0852863	P0A6D5, P15770	2	353	4139	11.7252	0.359637	0.106608	0.106608
Spectral Depth 150; Pyruvate kinase Module
Category	Term	Count	%	PValue	Genes	List Total	Pop Hits	Pop Total	Fold Enrichment	Bonferroni	Benjamini	FDR
INTERPRO	IPR001697:Pyruvate kinase	2	100	0.000505561	P0AD61, P21599	2	2	3956	1978	0.00403734	0.000674082	0.000505561
INTERPRO	IPR015793:Pyruvate kinase, barrel	2	100	0.000505561	P0AD61, P21599	2	2	3956	1978	0.00403734	0.000674082	0.000505561
INTERPRO	IPR018209:Pyruvate kinase, active site	2	100	0.000505561	P0AD61, P21599	2	2	3956	1978	0.00403734	0.000674082	0.000505561
INTERPRO	IPR015794:Pyruvate kinase, alpha/beta	2	100	0.000505561	P0AD61, P21599	2	2	3956	1978	0.00403734	0.000674082	0.000505561
INTERPRO	IPR015795:Pyruvate kinase, C-terminal	2	100	0.000505561	P0AD61, P21599	2	2	3956	1978	0.00403734	0.000674082	0.000505561
INTERPRO	IPR015806:Pyruvate kinase, beta-barrel insert domain	2	100	0.000505561	P0AD61, P21599	2	2	3956	1978	0.00403734	0.000674082	0.000505561
GOTERM_MF_DIRECT	GO:0004743~pyruvate kinase activity	2	100	0.000627746	P0AD61, P21599	2	2	3186	1593	0.00438596	0.00439422	0.00439422
UP_SEQ_FEATURE	metal ion-binding site:Potassium	2	100	0.000964553	P0AD61, P21599	2	4	4147	1036.75	0.00577338	0.00675187	0.00675187
INTERPRO	IPR011037:Pyruvate kinase-like, insert domain	2	100	0.00101112	P0AD61, P21599	2	4	3956	989	0.00806041	0.00115557	0.00101112
UP_KEYWORDS	Pyruvate	2	100	0.00169123	P0AD61, P21599	2	7	4139	591.286	0.018447	0.0186035	0.00338246
GOTERM_MF_DIRECT	GO:0030955~potassium ion binding	2	100	0.00345261	P0AD61, P21599	2	11	3186	289.636	0.0239193	0.0120841	0.0120841
INTERPRO	IPR015813:Pyruvate/Phosphoenolpyruvate kinase-like domain	2	100	0.00353893	P0AD61, P21599	2	14	3956	282.571	0.0279632	0.00353893	0.00353893
UP_KEYWORDS	Glycolysis	2	100	0.00459048	P0AD61, P21599	2	19	4139	217.842	0.0493521	0.0221471	0.00459048
UP_SEQ_FEATURE	site:Transition state stabilizer	2	100	0.00482276	P0AD61, P21599	2	20	4147	207.35	0.0285899	0.0123784	0.0123784
UP_SEQ_FEATURE	binding site:Substrate; via amide nitrogen	2	100	0.00530504	P0AD61, P21599	2	22	4147	188.5	0.0314111	0.0123784	0.0123784
UP_KEYWORDS	Potassium	2	100	0.00604011	P0AD61, P21599	2	25	4139	165.56	0.0644705	0.0221471	0.00604011
GOTERM_BP_DIRECT	GO:0051289~protein homotetramerization	2	100	0.00610314	P0AD61, P21599	2	20	3277	163.85	0.02419	0.00961245	0.00961245
GOTERM_BP_DIRECT	GO:0006096~glycolytic process	2	100	0.0064083	P0AD61, P21599	2	21	3277	156.048	0.0253879	0.00961245	0.00961245
UP_KEYWORDS	Allosteric enzyme	2	100	0.00845615	P0AD61, P21599	2	35	4139	118.257	0.0891829	0.0232544	0.00845615
UP_SEQ_FEATURE	metal ion-binding site:Magnesium	2	100	0.0163974	P0AD61, P21599	2	68	4147	60.9853	0.0944384	0.0286954	0.0286954
GOTERM_MF_DIRECT	GO:0016301~kinase activity	2	100	0.0166353	P0AD61, P21599	2	53	3186	60.1132	0.110794	0.0388157	0.0388157
UP_KEYWORDS	Acetylation	2	100	0.0234356	P0AD61, P21599	2	97	4139	42.6701	0.229612	0.0515583	0.0234356
KEGG_PATHWAY	eco00010:Glycolysis / Gluconeogenesis	2	100	0.0255754	P0AD61, P21599	2	40	1564	39.1	0.207984	0.135806	0.030179
KEGG_PATHWAY	eco00620:Pyruvate metabolism	2	100	0.0326087	P0AD61, P21599	2	51	1564	30.6667	0.257973	0.135806	0.0326087
UP_SEQ_FEATURE	binding site:Substrate	2	100	0.0337593	P0AD61, P21599	2	140	4147	29.6214	0.186211	0.0472631	0.0472631
UP_KEYWORDS	Kinase	2	100	0.0398647	P0AD61, P21599	2	165	4139	25.0848	0.360771	0.0730853	0.0398647
KEGG_PATHWAY	eco00230:Purine metabolism	2	100	0.0556266	P0AD61, P21599	2	87	1564	17.977	0.402561	0.135806	0.0556266
GOTERM_MF_DIRECT	GO:0000287~magnesium ion binding	2	100	0.0558694	P0AD61, P21599	2	178	3186	17.8989	0.331311	0.0977715	0.0977715
UP_KEYWORDS	Magnesium	2	100	0.0604011	P0AD61, P21599	2	250	4139	16.556	0.496073	0.094916	0.0604011
KEGG_PATHWAY	eco01200:Carbon metabolism	2	100	0.0684143	P0AD61, P21599	2	107	1564	14.6168	0.471548	0.135806	0.0684143
KEGG_PATHWAY	eco01230:Biosynthesis of amino acids	2	100	0.0754476	P0AD61, P21599	2	118	1564	13.2542	0.50639	0.135806	0.0754476
GOTERM_MF_DIRECT	GO:0042802~identical protein binding	2	100	0.0853735	P0AD61, P21599	2	272	3186	11.7132	0.464565	0.119523	0.119523
UP_KEYWORDS	ATP-binding	2	100	0.099541	P0AD61, P21599	2	412	4139	10.0461	0.684424	0.136869	0.099541
Spectral Depth 150; Citrate synthase Module
Category	Term	Count	%	PValue	Genes	List Total	Pop Hits	Pop Total	Fold Enrichment	Bonferroni	Benjamini	FDR
INTERPRO	IPR016142:Citrate synthase-like, large alpha subdomain	2	100	0.000505561	P0ABH7, P31660	2	2	3956	1978	0.00353357	0.000707786	0.000707786
INTERPRO	IPR002020:Citrate synthase-like	2	100	0.000505561	P0ABH7, P31660	2	2	3956	1978	0.00353357	0.000707786	0.000707786
INTERPRO	IPR024176:Citrate synthase, bacterial-type	2	100	0.000505561	P0ABH7, P31660	2	2	3956	1978	0.00353357	0.000707786	0.000707786
INTERPRO	IPR016143:Citrate synthase-like, small alpha subdomain	2	100	0.000505561	P0ABH7, P31660	2	2	3956	1978	0.00353357	0.000707786	0.000707786
INTERPRO	IPR019810:Citrate synthase active site	2	100	0.000505561	P0ABH7, P31660	2	2	3956	1978	0.00353357	0.000707786	0.000707786
GOTERM_MF_DIRECT	GO:0004108~citrate (Si)-synthase activity	2	100	0.000627746	P0ABH7, P31660	2	2	3186	1593	0.00250862	0.00251099	0.00251099
PIR_SUPERFAMILY	PIRSF001369:citrate synthase	2	100	0.0028169	P0ABH7, P31660	2	2	710	355	0.0028169	0.0028169	0.0028169
UP_KEYWORDS	Tricarboxylic acid cycle	2	100	0.00531529	P0ABH7, P31660	2	22	4139	188.136	0.0210923	0.0212612	0.0212612
GOTERM_BP_DIRECT	GO:0006099~tricarboxylic acid cycle	2	100	0.00823924	P0ABH7, P31660	2	27	3277	121.37	0.0245146	0.0164785	0.0164785
Spectral Depth 150; Ornithine metabolism Module
Category	Term	Count	%	PValue	Genes	List Total	Pop Hits	Pop Total	Fold Enrichment	Bonferroni	Benjamini	FDR
GOTERM_MF_DIRECT	GO:0004585~ornithine carbamoyltransferase activity	3	60	3.54622e-06	Q46803, P04391, P06960	5	3	3186	637.2	2.48233e-05	2.48235e-05	2.48235e-05
INTERPRO	IPR006131:Aspartate/ornithine carbamoyltransferase, Asp/Orn-binding domain	3	60	4.59872e-06	Q46803, P04391, P06960	5	4	3956	593.4	5.05847e-05	1.6862e-05	1.6862e-05
INTERPRO	IPR006130:Aspartate/ornithine carbamoyltransferase	3	60	4.59872e-06	Q46803, P04391, P06960	5	4	3956	593.4	5.05847e-05	1.6862e-05	1.6862e-05
INTERPRO	IPR006132:Aspartate/ornithine carbamoyltransferase, carbamoyl-P binding	3	60	4.59872e-06	Q46803, P04391, P06960	5	4	3956	593.4	5.05847e-05	1.6862e-05	1.6862e-05
GOTERM_BP_DIRECT	GO:0044238~primary metabolic process	3	60	1.11643e-05	Q46803, P04391, P06960	5	5	3277	393.24	0.000100474	6.2469e-05	6.2469e-05
GOTERM_BP_DIRECT	GO:0000050~urea cycle	3	60	1.67396e-05	Q46803, P04391, P06960	5	6	3277	327.7	0.000150646	6.2469e-05	6.2469e-05
GOTERM_BP_DIRECT	GO:0042450~arginine biosynthetic process via ornithine	3	60	2.34259e-05	Q46803, P04391, P06960	5	7	3277	280.886	0.000210813	6.2469e-05	6.2469e-05
GOTERM_MF_DIRECT	GO:0016597~amino acid binding	3	60	0.000410748	Q46803, P04391, P06960	5	27	3186	70.8	0.0028717	0.00143762	0.00143762
UP_SEQ_FEATURE	site:Important for structural integrity	2	40	0.00192841	P04391, P06960	5	2	4147	829.4	0.0191176	0.0042425	0.0042425
UP_SEQ_FEATURE	binding site:Carbamoyl phosphate	2	40	0.00192841	P04391, P06960	5	2	4147	829.4	0.0191176	0.0042425	0.0042425
UP_SEQ_FEATURE	region of interest:Ornithine binding	2	40	0.00192841	P04391, P06960	5	2	4147	829.4	0.0191176	0.0042425	0.0042425
UP_SEQ_FEATURE	region of interest:Carbamoyl phosphate binding	2	40	0.00192841	P04391, P06960	5	2	4147	829.4	0.0191176	0.0042425	0.0042425
UP_SEQ_FEATURE	chain:Ornithine carbamoyltransferase	2	40	0.00192841	P04391, P06960	5	2	4147	829.4	0.0191176	0.0042425	0.0042425
INTERPRO	IPR002292:Ornithine/putrescine carbamoyltransferase	2	40	0.00202148	P04391, P06960	5	2	3956	791.2	0.0220129	0.00444725	0.00444725
INTERPRO	IPR024904:Ornithine carbamoyltransferase	2	40	0.00202148	P04391, P06960	5	2	3956	791.2	0.0220129	0.00444725	0.00444725
GOTERM_BP_DIRECT	GO:0032324~molybdopterin cofactor biosynthetic process	2	40	0.00730702	P30749, P0A738	5	6	3277	218.467	0.0638735	0.014614	0.014614
UP_KEYWORDS	Molybdenum cofactor biosynthesis	2	40	0.0115508	P30749, P0A738	5	12	4139	137.967	0.0992816	0.0519788	0.0462033
UP_KEYWORDS	Arginine biosynthesis	2	40	0.0115508	P04391, P06960	5	12	4139	137.967	0.0992816	0.0519788	0.0462033
GOTERM_BP_DIRECT	GO:0006777~Mo-molybdopterin cofactor biosynthetic process	2	40	0.0157812	P30749, P0A738	5	13	3277	100.831	0.133387	0.0252499	0.0252499
KEGG_PATHWAY	eco00220:Arginine biosynthesis	2	40	0.0341526	P04391, P06960	4	18	1564	43.4444	0.215921	0.0796894	0.0341526
KEGG_PATHWAY	eco04122:Sulfur relay system	2	40	0.0341526	P30749, P0A738	4	18	1564	43.4444	0.215921	0.0796894	0.0341526
KEGG_PATHWAY	eco00790:Folate biosynthesis	2	40	0.0341526	P30749, P0A738	4	18	1564	43.4444	0.215921	0.0796894	0.0341526
KEGG_PATHWAY	eco01100:Metabolic pathways	4	80	0.083809	P30749, P04391, P06960, P0A738	4	685	1564	2.28321	0.458121	0.146666	0.083809
UP_KEYWORDS	Transferase	3	60	0.0927045	P30749, P04391, P06960	5	566	4139	4.38763	0.583381	0.21582	0.19184
UP_KEYWORDS	Amino-acid biosynthesis	2	40	0.09592	P04391, P06960	5	103	4139	16.0738	0.596483	0.21582	0.19184
Spectral Depth 150; Amino acid biosynthesis Module
Category	Term	Count	%	PValue	Genes	List Total	Pop Hits	Pop Total	Fold Enrichment	Bonferroni	Benjamini	FDR
UP_KEYWORDS	Amino-acid biosynthesis	39	69.6429	2.67483e-51	P30126, P0A6C5, P07623, P0A6E4, P11447, P11446, P00909, P0A6A6, P0A6C8, P30125, P0A877, P00904, P60595, P00968, P09151, P00547, P08660, P60757, P05793, P00561, P00562, P0A879, P0A9J8, P0A9L8, P06988, P06987, P07639, P06989, P0A6F1, P12008, P18335, P10371, P0ADF8, P00934, P60664, P00895, P07023, P07004, P00894	56	103	4139	27.9856	1.36416e-49	1.36416e-49	6.4196e-50
KEGG_PATHWAY	eco01230:Biosynthesis of amino acids	37	66.0714	5.37229e-30	P30126, P0A6C5, P07623, P0A6E4, P11447, P11446, P00909, P0A6A6, P0A6C8, P30125, P0A877, P00904, P60595, P09151, P00547, P08660, P60757, P05793, P00561, P00562, P0A879, P0A9J8, P0A9L8, P06988, P06987, P07639, P06989, P12008, P18335, P10371, P0ADF8, P00934, P60664, P00895, P07023, P07004, P00894	55	118	1564	8.91649	1.8803e-28	1.8803e-28	1.1819e-28
KEGG_PATHWAY	eco01110:Biosynthesis of secondary metabolites	44	78.5714	4.19561e-23	P30126, P0A6C5, P07623, P0A6E4, P11447, P11446, P00909, P0A6A6, P0A6C8, P30125, P0A877, P00904, P60595, P09151, P00547, P62615, P08660, P60757, P05793, P00561, P00562, P0A879, P0A9J8, P0A9L8, P06988, P06987, P07639, P06989, P15639, P12008, P0AG18, P0AG16, P18335, P0A7D7, P15640, P10371, P0ADF8, P00934, P08178, P60664, P00895, P07023, P07004, P00894	55	292	1564	4.28493	1.46846e-21	7.34231e-22	4.61517e-22
KEGG_PATHWAY	eco01100:Metabolic pathways	52	92.8571	8.50008e-16	P30126, P07623, P0A6E4, P51020, P11447, P11446, P0A6A6, P00909, P30125, P00904, P00547, P08244, P77581, P42588, P0A9L8, P06988, P06987, P07639, P06989, P0A6F1, P18335, P0A7D7, P10371, P0ADF8, P00934, P08178, P60664, P00895, P07004, P00894, P0A6C5, P0A7E3, P26281, P0A6C8, P0A877, P60595, P00968, P09151, P08660, P62615, P60757, P05793, P00561, P00562, P0A879, P0A9J8, P15639, P12008, P0AG18, P0AG16,…	55	685	1564	2.15867	3.10862e-14	9.91676e-15	6.23339e-15
GOTERM_BP_DIRECT	GO:0006526~arginine biosynthetic process	8	14.2857	2.92792e-11	P0A6C5, P0A6E4, P00968, P0A6F1, P11447, P11446, P0A6C8, P18335	56	10	3277	46.8143	1.58108e-09	1.58108e-09	9.66215e-10
UP_KEYWORDS	Arginine biosynthesis	8	14.2857	3.71747e-11	P0A6C5, P0A6E4, P00968, P0A6F1, P11447, P11446, P0A6C8, P18335	56	12	4139	49.2738	1.89591e-09	9.47954e-10	4.46096e-10
UP_KEYWORDS	Aromatic amino acid biosynthesis	9	16.0714	1.02309e-10	P0A9J8, P0A877, P00904, P07639, P12008, P00895, P07023, P00909, P0A879	56	21	4139	31.676	5.21775e-09	1.73925e-09	8.18471e-10
KEGG_PATHWAY	eco01210:2-Oxocarboxylic acid metabolism	12	21.4286	1.51661e-10	P30126, P0A6C5, P0ADF8, P09151, P08660, P11446, P0A6A6, P0A6C8, P05793, P00894, P18335, P30125	55	26	1564	13.1245	5.30815e-09	1.32704e-09	8.34138e-10
GOTERM_CC_DIRECT	GO:0005829~cytosol	40	71.4286	5.05775e-10	P30126, P0A6E4, P0A7E3, P11447, P0A6A6, P30125, P0A877, P00903, P00904, P00968, P09151, P00547, P08244, P77581, P08660, P60757, P05793, P00561, P00562, P0A879, P42588, P0A9L8, P06988, P06989, P0A6F1, P15639, P12008, P0AG18, P30177, P0AG16, P18335, P0A7D7, P10371, P0ADF8, P00934, P08178, P60664, P00895, P07004, P00894	51	1033	2941	2.23298	4.55197e-09	4.55197e-09	2.52887e-09
UP_KEYWORDS	Lyase	16	28.5714	7.95723e-10	P30126, P0A9J8, P06987, P07639, P51020, P11447, P12008, P00909, P0A6A6, P0A877, P00904, P00934, P08244, P60664, P00895, P0A879	56	157	4139	7.5323	4.05819e-08	8.56749e-09	4.03176e-09
UP_KEYWORDS	Histidine biosynthesis	7	12.5	8.3995e-10	P10371, P06988, P06987, P60595, P06989, P60664, P60757	56	10	4139	51.7375	4.28375e-08	8.56749e-09	4.03176e-09
KEGG_PATHWAY	eco01130:Biosynthesis of antibiotics	25	44.6429	2.27146e-09	P0A6C5, P0A6E4, P11447, P11446, P0A6C8, P62615, P08660, P05793, P00561, P00562, P0A9J8, P0A9L8, P07639, P15639, P12008, P0AG18, P0AG16, P18335, P0A7D7, P15640, P0ADF8, P08178, P07023, P07004, P00894	55	194	1564	3.66448	7.95011e-08	1.59002e-08	9.99442e-09
GOTERM_BP_DIRECT	GO:0000105~histidine biosynthetic process	7	12.5	3.37657e-09	P10371, P06988, P06987, P60595, P06989, P60664, P60757	56	10	3277	40.9625	1.82335e-07	9.11674e-08	5.57134e-08
GOTERM_BP_DIRECT	GO:0000162~tryptophan biosynthetic process	6	10.7143	2.26797e-08	P0A877, P00903, P00904, P00895, P00909, P0A879	56	7	3277	50.1582	1.2247e-06	4.08235e-07	2.49477e-07
UP_KEYWORDS	Branched-chain amino acid biosynthesis	7	12.5	6.84258e-08	P30126, P0ADF8, P09151, P0A6A6, P05793, P00894, P30125	56	18	4139	28.7431	3.48971e-06	5.81619e-07	2.73703e-07
KEGG_PATHWAY	eco00340:Histidine metabolism	7	12.5	9.94421e-08	P10371, P06988, P06987, P60595, P06989, P60664, P60757	55	9	1564	22.1172	3.48047e-06	5.80079e-07	3.64621e-07
UP_KEYWORDS	Multifunctional enzyme	9	16.0714	1.21312e-07	P0A9J8, P06987, P00904, P06989, P15639, P07023, P00909, P00561, P00562	56	47	4139	14.1531	6.18687e-06	8.83841e-07	4.15925e-07
KEGG_PATHWAY	eco00400:Phenylalanine, tyrosine and tryptophan biosynthesis	9	16.0714	1.71643e-07	P0A9J8, P0A877, P00904, P07639, P12008, P00895, P07023, P00909, P0A879	55	21	1564	12.187	6.00749e-06	8.58215e-07	5.39449e-07
UP_KEYWORDS	Transferase	24	42.8571	2.24004e-07	P07623, P0A6C5, P0A7E3, P15639, P26281, P30177, P0A6C8, P0AG16, P18335, P00903, P0ADF8, P00904, P60595, P00547, P09151, P05041, P62615, P77581, P08660, P60757, P00894, P00561, P42588, P00562	56	566	4139	3.13402	1.14242e-05	1.42803e-06	6.72013e-07
UP_KEYWORDS	Tryptophan biosynthesis	5	8.92857	4.10736e-07	P0A877, P00904, P00895, P00909, P0A879	56	6	4139	61.5923	2.09473e-05	2.32751e-06	1.0953e-06
GOTERM_BP_DIRECT	GO:0006189~'de novo' IMP biosynthetic process	6	10.7143	8.0228e-07	P15640, P15639, P08178, P0AG18, P0AG16, P0A7D7	56	12	3277	29.2589	4.33222e-05	1.08308e-05	6.61881e-06
GOTERM_BP_DIRECT	GO:0008652~cellular amino acid biosynthetic process	8	14.2857	1.77132e-06	P0A877, P00904, P07639, P00968, P12008, P00895, P00909, P0A879	56	37	3277	12.6525	9.56466e-05	1.91302e-05	1.16907e-05
UP_KEYWORDS	Purine biosynthesis	6	10.7143	1.88782e-06	P15640, P15639, P08178, P0AG18, P0AG16, P0A7D7	56	17	4139	26.0861	9.62742e-05	9.62788e-06	4.53077e-06
INTERPRO	IPR001048:Aspartate/glutamate/uridylate kinase	5	8.92857	6.60484e-06	P0A6C5, P08660, P0A6C8, P00561, P00562	56	10	3956	35.3214	0.00119477	0.00119548	0.00116245
KEGG_PATHWAY	eco00290:Valine, leucine and isoleucine biosynthesis	7	12.5	7.86075e-06	P30126, P0ADF8, P09151, P0A6A6, P05793, P00894, P30125	55	16	1564	12.4409	0.000275089	3.43908e-05	2.16171e-05
UP_KEYWORDS	Cytoplasm	23	41.0714	1.01605e-05	P0A9J8, P07623, P0A6C5, P0A9L8, P0A6E4, P06987, P07639, P06989, P11447, P11446, P0A6C8, P18335, P30125, P10371, P60595, P00547, P08178, P60664, P76251, P07023, P07004, P60757, P05793	56	647	4139	2.62743	0.000518052	4.71076e-05	2.21683e-05
UP_KEYWORDS	Glutamine amidotransferase	5	8.92857	1.27721e-05	P00903, P00904, P60595, P0A6F1, P0AG16	56	12	4139	30.7961	0.000651171	5.42816e-05	2.55443e-05
INTERPRO	IPR011060:Ribulose-phosphate binding barrel	5	8.92857	1.52492e-05	P0A877, P10371, P08244, P60664, P00909	56	12	3956	29.4345	0.00275633	0.00131525	0.00127892
UP_KEYWORDS	Leucine biosynthesis	4	7.14286	2.17988e-05	P30126, P09151, P0A6A6, P30125	56	5	4139	59.1286	0.00111114	8.55186e-05	4.0244e-05
INTERPRO	IPR002912:ACT domain	5	8.92857	2.17997e-05	P0A9J8, P0ADF8, P08660, P00894, P00561	56	13	3956	27.1703	0.00393801	0.00131525	0.00127892
GOTERM_BP_DIRECT	GO:0006541~glutamine metabolic process	5	8.92857	3.18413e-05	P00903, P00904, P60595, P0A6F1, P0AG16	56	12	3277	24.3824	0.00171798	0.000286572	0.000175127
GOTERM_MF_DIRECT	GO:0016597~amino acid binding	6	10.7143	7.70829e-05	P0A9J8, P0ADF8, P00968, P08660, P00894, P00561	56	27	3186	12.6429	0.00660746	0.00662913	0.0063208
UP_SEQ_FEATURE	domain:Glutamine amidotransferase type-1	4	7.14286	0.000117983	P00903, P00904, P60595, P0A6F1	56	8	4147	37.0268	0.0147567	0.0149838	0.0149838
INTERPRO	IPR017926:Glutamine amidotransferase	4	7.14286	0.000135604	P00903, P00904, P60595, P0A6F1	56	8	3956	35.3214	0.0242471	0.00613606	0.00596656
GOTERM_BP_DIRECT	GO:0009088~threonine biosynthetic process	4	7.14286	0.000149372	P00934, P00547, P00561, P00562	56	7	3277	33.4388	0.00803424	0.00100826	0.000616159
GOTERM_BP_DIRECT	GO:0044205~'de novo' UMP biosynthetic process	4	7.14286	0.000149372	P0A7E3, P00968, P0A6F1, P08244	56	7	3277	33.4388	0.00803424	0.00100826	0.000616159
KEGG_PATHWAY	eco00660:C5-Branched dibasic acid metabolism	5	8.92857	0.000228874	P30126, P0ADF8, P0A6A6, P00894, P30125	55	10	1564	14.2182	0.00797949	0.000867223	0.000545112
KEGG_PATHWAY	eco00220:Arginine biosynthesis	6	10.7143	0.000247778	P0A6C5, P0A6E4, P11447, P11446, P0A6C8, P18335	55	18	1564	9.47879	0.0086358	0.000867223	0.000545112
INTERPRO	IPR013785:Aldolase-type TIM barrel	7	12.5	0.000334262	P0A877, P10371, P09151, P51020, P08244, P60664, P00909	56	69	3956	7.16667	0.0587171	0.0121003	0.011766
UP_KEYWORDS	Pyrimidine biosynthesis	4	7.14286	0.000339844	P0A7E3, P00968, P0A6F1, P08244	56	11	4139	26.8766	0.0171856	0.001238	0.00058259
GOTERM_BP_DIRECT	GO:0009098~leucine biosynthetic process	4	7.14286	0.000350024	P30126, P09151, P0A6A6, P30125	56	9	3277	26.0079	0.018727	0.00210014	0.00128342
UP_SEQ_FEATURE	region of interest:Aspartokinase	3	5.35714	0.000513803	P08660, P00561, P00562	56	3	4147	74.0536	0.0627037	0.021751	0.021751
UP_SEQ_FEATURE	region of interest:Interface	3	5.35714	0.000513803	P08660, P00561, P00562	56	3	4147	74.0536	0.0627037	0.021751	0.021751
INTERPRO	IPR018042:Aspartate kinase, conserved site	3	5.35714	0.000564386	P08660, P00561, P00562	56	3	3956	70.6429	0.0971355	0.0145934	0.0141903
INTERPRO	IPR001341:Aspartate kinase domain	3	5.35714	0.000564386	P08660, P00561, P00562	56	3	3956	70.6429	0.0971355	0.0145934	0.0141903
GOTERM_MF_DIRECT	GO:0050661~NADP binding	5	8.92857	0.000653827	P0A9L8, P07004, P05793, P00561, P00562	56	24	3186	11.8527	0.0546948	0.0248916	0.0237339
UP_KEYWORDS	ATP-binding	15	26.7857	0.000713675	P0A6E4, P06989, P0A6F1, P26281, P0A6C8, P0A7D7, P15640, P00968, P00547, P08178, P62615, P08660, P60757, P00561, P00562	56	412	4139	2.69092	0.0357555	0.00242649	0.00114188
GOTERM_CC_DIRECT	GO:0005950~anthranilate synthase complex	3	5.35714	0.000840796	P00903, P00904, P00895	51	3	2941	57.6667	0.00754176	0.00260229	0.00144572
GOTERM_CC_DIRECT	GO:0005737~cytoplasm	20	35.7143	0.000867431	P0A9J8, P07623, P0A6C5, P0A6E4, P0A7E3, P06987, P07639, P0A6F1, P11446, P0A6C8, P0AG16, P0A877, P00934, P00968, P05041, P08244, P76251, P07023, P07004, P0A879	51	544	2941	2.1201	0.00777985	0.00260229	0.00144572
GOTERM_MF_DIRECT	GO:0004049~anthranilate synthase activity	3	5.35714	0.000868313	P00903, P00904, P00895	56	3	3186	56.8929	0.0719849	0.0248916	0.0237339
GOTERM_BP_DIRECT	GO:0009082~branched-chain amino acid biosynthetic process	4	7.14286	0.000884486	P30126, P09151, P0A6A6, P30125	56	12	3277	19.506	0.0466597	0.00477622	0.0029188
UP_KEYWORDS	Allosteric enzyme	5	8.92857	0.00107656	P07623, P00904, P00895, P08660, P00561	56	35	4139	10.5587	0.0534525	0.00330212	0.00155394
UP_KEYWORDS	NADP	7	12.5	0.00110071	P0A9L8, P12008, P11446, P07004, P05793, P00561, P00562	56	90	4139	5.74861	0.0546186	0.00330212	0.00155394
KEGG_PATHWAY	eco00260:Glycine, serine and threonine metabolism	7	12.5	0.00112007	P0A877, P00934, P00547, P08660, P00561, P0A879, P00562	55	36	1564	5.52929	0.0384651	0.00356386	0.00224014
UP_KEYWORDS	Nucleotide-binding	16	28.5714	0.00121429	P0A6E4, P06989, P0A6F1, P26281, P0A6C8, P0A7D7, P15640, P00968, P00547, P08178, P62615, P08660, P60757, P05793, P00561, P00562	56	486	4139	2.43327	0.0600855	0.00344048	0.00161905
GOTERM_BP_DIRECT	GO:0009073~aromatic amino acid family biosynthetic process	4	7.14286	0.00142895	P0A877, P07639, P12008, P0A879	56	14	3277	16.7194	0.0743125	0.00701486	0.00428686
GOTERM_BP_DIRECT	GO:0009090~homoserine biosynthetic process	3	5.35714	0.00162432	P08660, P00561, P00562	56	4	3277	43.8884	0.0840417	0.00730943	0.00446687
UP_KEYWORDS	Threonine biosynthesis	3	5.35714	0.00169007	P00934, P00547, P00561	56	5	4139	44.3464	0.0826503	0.00453651	0.00213483
GOTERM_MF_DIRECT	GO:0004072~aspartate kinase activity	3	5.35714	0.00171738	P08660, P00561, P00562	56	4	3186	42.6696	0.137415	0.0369236	0.0352062
GOTERM_MF_DIRECT	GO:0030170~pyridoxal phosphate binding	6	10.7143	0.00269724	P0A877, P00934, P77581, P18335, P0A879, P42588	56	57	3186	5.98872	0.207273	0.0423159	0.0403477
GOTERM_MF_DIRECT	GO:0000287~magnesium ion binding	10	17.8571	0.00295227	P15640, P0A7E3, P00904, P05041, P26281, P76251, P60757, P05793, P0AG16, P30125	56	178	3186	3.19623	0.224518	0.0423159	0.0403477
UP_SEQ_FEATURE	domain:ACT	3	5.35714	0.00347581	P0ADF8, P08660, P00894	56	7	4147	31.7372	0.355136	0.110357	0.110357
INTERPRO	IPR005814:Aminotransferase class-III	3	5.35714	0.00381169	P77581, P18335, P42588	56	7	3956	30.2755	0.499043	0.0862396	0.0838573
GOTERM_BP_DIRECT	GO:0000050~urea cycle	3	5.35714	0.00397389	P0A6E4, P00968, P0A6F1	56	6	3277	29.2589	0.193473	0.0165069	0.0100876
UP_KEYWORDS	Folate biosynthesis	3	5.35714	0.00461241	P00903, P05041, P26281	56	8	4139	27.7165	0.210043	0.0117617	0.00553489
UP_KEYWORDS	Magnesium	10	17.8571	0.00508327	P15640, P0A7E3, P06987, P05041, P00895, P76251, P60757, P05793, P0AG16, P30125	56	250	4139	2.95643	0.228877	0.0123451	0.00580945
GOTERM_BP_DIRECT	GO:0042450~arginine biosynthetic process via ornithine	3	5.35714	0.0055037	P77581, P11447, P18335	56	7	3277	25.0791	0.257714	0.0212285	0.012973
UP_KEYWORDS	Glycosyltransferase	5	8.92857	0.00576202	P0A7E3, P00904, P60757, P30177, P0AG16	56	55	4139	6.71916	0.255255	0.0133574	0.00628584
UP_KEYWORDS	Ligase	6	10.7143	0.0070467	P15640, P0A6E4, P00968, P0A6F1, P08178, P0A7D7	56	92	4139	4.82026	0.30278	0.0156253	0.00735307
UP_KEYWORDS	Pyridoxal phosphate	5	8.92857	0.00739402	P00934, P77581, P18335, P0A879, P42588	56	59	4139	6.26362	0.315109	0.0157123	0.00739402
GOTERM_BP_DIRECT	GO:0046656~folic acid biosynthetic process	3	5.35714	0.0114186	P00903, P05041, P26281	56	10	3277	17.5554	0.462137	0.0411069	0.0251209
GOTERM_MF_DIRECT	GO:0005524~ATP binding	15	26.7857	0.0127868	P0A6E4, P06989, P0A6F1, P26281, P0A6C8, P0A7D7, P15640, P00968, P00547, P08178, P62615, P08660, P60757, P00561, P00562	56	433	3186	1.97088	0.66937	0.157095	0.149788
KEGG_PATHWAY	eco00300:Lysine biosynthesis	4	7.14286	0.0131943	P08660, P00561, P18335, P00562	55	15	1564	7.58303	0.371786	0.0384834	0.0241896
INTERPRO	IPR013816:ATP-grasp fold, subdomain 2	3	5.35714	0.0134206	P15640, P00968, P0A7D7	56	13	3956	16.3022	0.913323	0.210403	0.204591
GOTERM_BP_DIRECT	GO:0046654~tetrahydrofolate biosynthetic process	3	5.35714	0.0138069	P00903, P05041, P26281	56	11	3277	15.9594	0.527995	0.0442566	0.0270457
GOTERM_BP_DIRECT	GO:0009089~lysine biosynthetic process via diaminopimelate	3	5.35714	0.0163914	P08660, P00561, P00562	56	12	3277	14.6295	0.590356	0.0442566	0.0270457
GOTERM_BP_DIRECT	GO:0009099~valine biosynthetic process	3	5.35714	0.0163914	P0ADF8, P05793, P00894	56	12	3277	14.6295	0.590356	0.0442566	0.0270457
GOTERM_BP_DIRECT	GO:0006207~'de novo' pyrimidine nucleobase biosynthetic process	3	5.35714	0.0163914	P0A7E3, P0A6F1, P08244	56	12	3277	14.6295	0.590356	0.0442566	0.0270457
GOTERM_BP_DIRECT	GO:0009097~isoleucine biosynthetic process	3	5.35714	0.0163914	P0ADF8, P05793, P00894	56	12	3277	14.6295	0.590356	0.0442566	0.0270457
KEGG_PATHWAY	eco00250:Alanine, aspartate and glutamate metabolism	5	8.92857	0.0199881	P0A6E4, P00968, P0A6F1, P11447, P0AG16	55	31	1564	4.58651	0.506715	0.053814	0.0338259
UP_KEYWORDS	Kinase	7	12.5	0.0210912	P00547, P62615, P26281, P08660, P0A6C8, P00561, P00562	56	165	4139	3.13561	0.662827	0.0430261	0.0210912
COG_ONTOLOGY	Amino acid transport and metabolism	3	5.35714	0.024339	P06988, P00934, P0A879	4	59	630	8.00847	0.0712542	0.048678	0.048678
UP_KEYWORDS	Manganese	5	8.92857	0.0245697	P15640, P00968, P51020, P76251, P30125	56	84	4139	4.39945	0.718804	0.0481944	0.0245697
UP_SEQ_FEATURE	region of interest:Homoserine dehydrogenase	2	3.57143	0.0263525	P00561, P00562	56	2	4147	74.0536	0.965436	0.478109	0.478109
UP_SEQ_FEATURE	chain:Succinylornithine transaminase	2	3.57143	0.0263525	P77581, P18335	56	2	4147	74.0536	0.965436	0.478109	0.478109
UP_SEQ_FEATURE	domain:Chorismate mutase	2	3.57143	0.0263525	P0A9J8, P07023	56	2	4147	74.0536	0.965436	0.478109	0.478109
SMART	SM00830:SM00830	2	3.57143	0.0276022	P0A9J8, P07023	12	2	792	66	0.265006	0.150854	0.150854
INTERPRO	IPR006805:Anthranilate synthase component I, N-terminal	2	3.57143	0.027616	P05041, P00895	56	2	3956	70.6429	0.99371	0.210403	0.204591
INTERPRO	IPR019811:Homoserine dehydrogenase, conserved site	2	3.57143	0.027616	P00561, P00562	56	2	3956	70.6429	0.99371	0.210403	0.204591
INTERPRO	IPR011147:Bifunctional aspartokinase/homoserine dehydrogenase I	2	3.57143	0.027616	P00561, P00562	56	2	3956	70.6429	0.99371	0.210403	0.204591
INTERPRO	IPR002701:Chorismate mutase	2	3.57143	0.027616	P0A9J8, P07023	56	2	3956	70.6429	0.99371	0.210403	0.204591
INTERPRO	IPR006221:Anthranilate synthase/para-aminobenzoate synthase like domain	2	3.57143	0.027616	P00903, P00904	56	2	3956	70.6429	0.99371	0.210403	0.204591
INTERPRO	IPR020822:Chorismate mutase, type II	2	3.57143	0.027616	P0A9J8, P07023	56	2	3956	70.6429	0.99371	0.210403	0.204591
INTERPRO	IPR006062:Histidine biosynthesis	2	3.57143	0.027616	P10371, P60664	56	2	3956	70.6429	0.99371	0.210403	0.204591
INTERPRO	IPR000891:Pyruvate carboxyltransferase	2	3.57143	0.027616	P09151, P51020	56	2	3956	70.6429	0.99371	0.210403	0.204591
INTERPRO	IPR019999:Anthranilate synthase component I	2	3.57143	0.027616	P05041, P00895	56	2	3956	70.6429	0.99371	0.210403	0.204591
INTERPRO	IPR004636:Transaminase, Acetylornithine/Succinylornithine family	2	3.57143	0.027616	P77581, P18335	56	2	3956	70.6429	0.99371	0.210403	0.204591
INTERPRO	IPR005106:Aspartate/homoserine dehydrogenase, NAD-binding	2	3.57143	0.027616	P00561, P00562	56	2	3956	70.6429	0.99371	0.210403	0.204591
INTERPRO	IPR017652:Acetyl/Succinylornithine transaminase family, bacteria	2	3.57143	0.027616	P77581, P18335	56	2	3956	70.6429	0.99371	0.210403	0.204591
INTERPRO	IPR001342:Homoserine dehydrogenase, catalytic	2	3.57143	0.027616	P00561, P00562	56	2	3956	70.6429	0.99371	0.210403	0.204591
INTERPRO	IPR016040:NAD(P)-binding domain	6	10.7143	0.0278026	P0A9L8, P07023, P11446, P05793, P00561, P00562	56	124	3956	3.4182	0.993925	0.210403	0.204591
INTERPRO	IPR020568:Ribosomal protein S5 domain 2-type fold	3	5.35714	0.0278988	P06987, P00547, P62615	56	19	3956	11.1541	0.994033	0.210403	0.204591
UP_KEYWORDS	Aminotransferase	3	5.35714	0.0282678	P77581, P18335, P42588	56	20	4139	11.0866	0.768327	0.0533948	0.0282678
INTERPRO	IPR008927:6-phosphogluconate dehydrogenase, C-terminal-like	3	5.35714	0.0307262	P0A9L8, P07023, P05793	56	20	3956	10.5964	0.996478	0.222458	0.216312
GOTERM_BP_DIRECT	GO:0006571~tyrosine biosynthetic process	2	3.57143	0.0332906	P0A9J8, P07023	56	2	3277	58.5179	0.839313	0.0781606	0.0477648
GOTERM_BP_DIRECT	GO:0009113~purine nucleobase biosynthetic process	2	3.57143	0.0332906	P15640, P0AG16	56	2	3277	58.5179	0.839313	0.0781606	0.0477648
GOTERM_BP_DIRECT	GO:0046417~chorismate metabolic process	2	3.57143	0.0332906	P0A9J8, P07023	56	2	3277	58.5179	0.839313	0.0781606	0.0477648
GOTERM_CC_DIRECT	GO:0005951~carbamoyl-phosphate synthase complex	2	3.57143	0.0337187	P00968, P0A6F1	51	2	2941	57.6667	0.265601	0.0606936	0.0337187
GOTERM_CC_DIRECT	GO:0009382~imidazoleglycerol-phosphate synthase complex	2	3.57143	0.0337187	P60595, P60664	51	2	2941	57.6667	0.265601	0.0606936	0.0337187
GOTERM_MF_DIRECT	GO:0046820~4-amino-4-deoxychorismate synthase activity	2	3.57143	0.0342334	P00903, P05041	56	2	3186	56.8929	0.949996	0.196271	0.187142
GOTERM_MF_DIRECT	GO:0004088~carbamoyl-phosphate synthase (glutamine-hydrolyzing) activity	2	3.57143	0.0342334	P00968, P0A6F1	56	2	3186	56.8929	0.949996	0.196271	0.187142
GOTERM_MF_DIRECT	GO:0000107~imidazoleglycerol-phosphate synthase activity	2	3.57143	0.0342334	P60595, P60664	56	2	3186	56.8929	0.949996	0.196271	0.187142
GOTERM_MF_DIRECT	GO:0003862~3-isopropylmalate dehydrogenase activity	2	3.57143	0.0342334	P76251, P30125	56	2	3186	56.8929	0.949996	0.196271	0.187142
GOTERM_MF_DIRECT	GO:0004834~tryptophan synthase activity	2	3.57143	0.0342334	P0A877, P0A879	56	2	3186	56.8929	0.949996	0.196271	0.187142
GOTERM_MF_DIRECT	GO:0004106~chorismate mutase activity	2	3.57143	0.0342334	P0A9J8, P07023	56	2	3186	56.8929	0.949996	0.196271	0.187142
GOTERM_MF_DIRECT	GO:0004412~homoserine dehydrogenase activity	2	3.57143	0.0342334	P00561, P00562	56	2	3186	56.8929	0.949996	0.196271	0.187142
GOTERM_MF_DIRECT	GO:0003861~3-isopropylmalate dehydratase activity	2	3.57143	0.0342334	P30126, P0A6A6	56	2	3186	56.8929	0.949996	0.196271	0.187142
GOTERM_MF_DIRECT	GO:0051287~NAD binding	4	7.14286	0.036939	P06988, P76251, P11446, P30125	56	43	3186	5.29236	0.960715	0.198547	0.189312
UP_KEYWORDS	Proline biosynthesis	2	3.57143	0.0393467	P0A9L8, P07004	56	3	4139	49.2738	0.870908	0.0716672	0.0393467
UP_KEYWORDS	Oxidoreductase	10	17.8571	0.0409469	P0A9L8, P06988, P76251, P07023, P11446, P07004, P05793, P00561, P30125, P00562	56	353	4139	2.09379	0.88143	0.07201	0.0409469
INTERPRO	IPR019818:Isocitrate/isopropylmalate dehydrogenase, conserved site	2	3.57143	0.0411419	P76251, P30125	56	3	3956	47.0952	0.999502	0.232709	0.22628
INTERPRO	IPR000312:Glycosyl transferase, family 3	2	3.57143	0.0411419	P00904, P30177	56	3	3956	47.0952	0.999502	0.232709	0.22628
INTERPRO	IPR001804:Isocitrate and isopropylmalate dehydrogenases family	2	3.57143	0.0411419	P76251, P30125	56	3	3956	47.0952	0.999502	0.232709	0.22628
INTERPRO	IPR006204:GHMP kinase N-terminal domain	2	3.57143	0.0411419	P00547, P62615	56	3	3956	47.0952	0.999502	0.232709	0.22628
INTERPRO	IPR017459:Glycosyl transferase family 3, N-terminal domain	2	3.57143	0.0411419	P00904, P30177	56	3	3956	47.0952	0.999502	0.232709	0.22628
INTERPRO	IPR011607:Methylglyoxal synthase-like domain	2	3.57143	0.0411419	P00968, P15639	56	3	3956	47.0952	0.999502	0.232709	0.22628
INTERPRO	IPR013750:GHMP kinase, C-terminal domain	2	3.57143	0.0411419	P00547, P62615	56	3	3956	47.0952	0.999502	0.232709	0.22628
SMART	SM00851:SM00851	2	3.57143	0.0411419	P00968, P15639	12	3	792	44	0.370062	0.150854	0.150854
SMART	SM01329:SM01329	2	3.57143	0.0411419	P76251, P30125	12	3	792	44	0.370062	0.150854	0.150854
KEGG_PATHWAY	eco00261:Monobactam biosynthesis	3	5.35714	0.0440931	P08660, P00561, P00562	55	10	1564	8.53091	0.793678	0.110233	0.0692892
UP_KEYWORDS	Isomerase	5	8.92857	0.0482525	P0A9J8, P10371, P07023, P0AG18, P00909	56	104	4139	3.5534	0.91972	0.0820293	0.0482525
GOTERM_BP_DIRECT	GO:0055129~L-proline biosynthetic process	2	3.57143	0.0495254	P0A9L8, P07004	56	3	3277	39.0119	0.935615	0.106975	0.0653736
GOTERM_BP_DIRECT	GO:0009094~L-phenylalanine biosynthetic process	2	3.57143	0.0495254	P0A9J8, P07023	56	3	3277	39.0119	0.935615	0.106975	0.0653736
GOTERM_CC_DIRECT	GO:0005948~acetolactate synthase complex	2	3.57143	0.0501576	P0ADF8, P00894	51	3	2941	38.4444	0.370691	0.0752365	0.0501576
GOTERM_MF_DIRECT	GO:0016866~intramolecular transferase activity	2	3.57143	0.0509159	P30126, P0A6A6	56	3	3186	37.9286	0.988826	0.243265	0.23195
GOTERM_MF_DIRECT	GO:0003992~N2-acetyl-L-ornithine:2-oxoglutarate 5-aminotransferase activity	2	3.57143	0.0509159	P77581, P18335	56	3	3186	37.9286	0.988826	0.243265	0.23195
UP_SEQ_FEATURE	active site:For GATase activity	2	3.57143	0.0520228	P00904, P0AG16	56	4	4147	37.0268	0.998807	0.825861	0.825861
KEGG_PATHWAY	eco00330:Arginine and proline metabolism	4	7.14286	0.0523178	P0A9L8, P77581, P07004, P42588	55	25	1564	4.54982	0.847526	0.122075	0.0767328
PIR_SUPERFAMILY	PIRSF000727:bifunctional aspartokinase/homoserine dehydrogenase I	2	3.57143	0.0528417	P00561, P00562	20	2	710	35.5	0.643525	1	1
INTERPRO	IPR005801:ADC synthase	2	3.57143	0.0544829	P05041, P00895	56	4	3956	35.3214	0.999961	0.290041	0.282029
INTERPRO	IPR015890:Chorismate binding, C-terminal	2	3.57143	0.0544829	P05041, P00895	56	4	3956	35.3214	0.999961	0.290041	0.282029
INTERPRO	IPR015937:Aconitase/isopropylmalate dehydratase	2	3.57143	0.0676417	P30126, P0A6A6	56	5	3956	28.2571	0.999997	0.340087	0.330693
INTERPRO	IPR024084:Isopropylmalate dehydrogenase-like domain	2	3.57143	0.0676417	P76251, P30125	56	5	3956	28.2571	0.999997	0.340087	0.330693
INTERPRO	IPR015422:Pyridoxal phosphate-dependent transferase, major region, subdomain 2	3	5.35714	0.0721988	P77581, P18335, P42588	56	32	3956	6.62277	0.999999	0.353189	0.343432
GOTERM_MF_DIRECT	GO:0030145~manganese ion binding	4	7.14286	0.0740859	P15640, P06988, P51020, P30125	56	57	3186	3.99248	0.998666	0.335336	0.319739
KEGG_PATHWAY	eco00270:Cysteine and methionine metabolism	4	7.14286	0.0754992	P07623, P08660, P00561, P00562	55	29	1564	3.92226	0.935915	0.165155	0.103811
GOTERM_MF_DIRECT	GO:0003984~acetolactate synthase activity	2	3.57143	0.0834366	P0ADF8, P00894	56	5	3186	22.7571	0.999443	0.358777	0.34209
Spectral Depth 150; Alcohol dehydrogenase module
Category	Term	Count	%	PValue	Genes	List Total	Pop Hits	Pop Total	Fold Enrichment	Bonferroni	Benjamini	FDR
INTERPRO	IPR018211:Alcohol dehydrogenase, iron-type, conserved site	2	100	0.00176946	P0A9S5, P45579	2	7	3956	565.143	0.0035358	0.00176946	0.00176946
INTERPRO	IPR001670:Alcohol dehydrogenase, iron-type	2	100	0.00176946	P0A9S5, P45579	2	7	3956	565.143	0.0035358	0.00176946	0.00176946
UP_SEQ_FEATURE	metal ion-binding site:Zinc; catalytic	2	100	0.0050639	P0A9S5, P45579	2	21	4147	197.476	0.0300014	0.0354473	0.0354473
UP_KEYWORDS	Zinc	2	100	0.0437304	P0A9S5, P45579	2	181	4139	22.8674	0.200347	0.213216	0.213216
UP_KEYWORDS	Oxidoreductase	2	100	0.0852863	P0A9S5, P45579	2	353	4139	11.7252	0.359637	0.213216	0.213216
GOTERM_MF_DIRECT	GO:0042802~identical protein binding	2	100	0.0853735	P0A9S5, P45579	2	272	3186	11.7132	0.414587	0.282486	0.282486
GOTERM_MF_DIRECT	GO:0046872~metal ion binding	2	100	0.094162	P0A9S5, P45579	2	300	3186	10.62	0.447537	0.282486	0.282486
Spectral Depth 150; Thiamine biosynthesis Module
Category	Term	Count	%	PValue	Genes	List Total	Pop Hits	Pop Total	Fold Enrichment	Bonferroni	Benjamini	FDR
UP_KEYWORDS	Thiamine biosynthesis	3	100	6.42254e-06	P30137, P30139, O32583	3	11	4139	376.273	5.78014e-05	5.78029e-05	5.78029e-05
GOTERM_BP_DIRECT	GO:0009229~thiamine diphosphate biosynthetic process	3	100	1.02464e-05	P30137, P30139, O32583	3	11	3277	297.909	3.0739e-05	1.22957e-05	1.22957e-05
GOTERM_BP_DIRECT	GO:0009228~thiamine biosynthetic process	3	100	1.22957e-05	P30137, P30139, O32583	3	12	3277	273.083	3.68867e-05	1.22957e-05	1.22957e-05
KEGG_PATHWAY	eco00730:Thiamine metabolism	2	66.6667	0.0152913	P30137, P30139	3	12	1564	86.8889	0.0451759	0.0458738	0.0458738
INTERPRO	IPR013785:Aldolase-type TIM barrel	2	66.6667	0.0345838	P30137, P30139	3	69	3956	38.2222	0.2454	0.276671	0.276671

[truncated: 2 more sheets: DAVID_Output_SD300, DAVID_Output_SD1000]
