# Supplementary material for: Defining hierarchical protein interaction networks from spectral analysis of bacterial proteomes
Source: eLife. 2022 Aug 17;11:e74104. doi: 10.7554/eLife.74104 (PMC9427106; doi:10.7554/eLife.74104)
Supplement: Supplementary file 5. [file elife-74104-supp5.xls]

## Sheet: Overview
Supplementary File 5: Data related to Figure 7A,B and Figure 7--Figure Supplement 1
Tab	Contents
Spectral Depth Table	Hierarchically clustered spectral depth matrix for P. aeruginosa proteins coevolving with PilA
SDX	Adjacency matrix generated by thresholding the hierarchically clustered spectral depth matrix to spectral depth 'X'
David_Output_SDX	Output table for gene set enrichment analysis of the sets of proteins within each statistical module observed at a spectral depth of 'X' using David v6.8

## Sheet: Spectral Depth Table
Row	G3XCZ0_fimT	Q9HVN0_fimT	G3XD84_pilV	Q9I0G5_	G3XCX7_pilP	G3XD15_	Q9HVM8_pilY1	G3XCX3_pilU	G3XD51_pilO	P04739_pilA	Q9I5G6_	Q9I5R2_	G3XCV8_	Q9I0H3_norR	Q9I362_nifA	G3XD43_pilE	O50274_cysN	Q9HWA2_	Q9I2C1_pqqD	P58040_yeiW	Q9I1U8_	Q9I2D5_	Q9HX50_	Q9HZB9_	Q9HWR9_	Q9HZG7_yqjE	Q9I5Z4_yqjC	Q9HW81_	Q9HXR2_	Q9HZL5_pilZ_1	P11221_oprI	Q9HT93_	Q9HX54_	Q9HZF7_VV12640	Q9HVF2_yajG	Q9HW86_mvaT	Q9I0H1_mvaT	Q9I628_	Q9HZJ0_	Q9I133_tyrR	Q9I572_tyrR	Q01725_lifO	Q9HUK7_	Q9HWC2_	Q9I014_	Q9HV99_	Q9HW76_	Q9I338_	Q9I4M0_mdoB
G3XCZ0_fimT	3000	3000	1416	1416	403	1123	591	84	62	172	172	96	51	51	51	66	51	51	51	51	51	51	51	51	51	51	51	65	68	62	51	51	51	51	51	51	51	51	51	51	51	57	54	68	68	77	77	51	51
Q9HVN0_fimT	3000	3000	1416	1416	403	1123	591	84	62	172	172	96	51	51	51	66	51	51	51	51	51	51	51	51	51	51	51	65	68	62	51	51	51	51	51	51	51	51	51	51	51	57	54	68	68	77	77	51	51
G3XD84_pilV	1416	1416	3000	3000	479	1011	433	93	483	227	227	80	51	51	51	51	51	51	51	51	51	51	51	51	51	51	51	51	51	51	51	51	51	51	51	51	51	51	51	51	51	51	51	51	51	51	51	51	51
Q9I0G5_	1416	1416	3000	3000	479	1011	433	93	483	227	227	80	51	51	51	51	51	51	51	51	51	51	51	51	51	51	51	51	51	51	51	51	51	51	51	51	51	51	51	51	51	51	51	51	51	51	51	51	51
G3XCX7_pilP	403	403	479	479	3000	444	634	271	466	222	222	82	51	51	51	51	51	51	51	51	51	51	51	51	51	51	51	51	58	51	51	51	51	51	51	51	51	51	51	51	51	62	57	51	51	66	66	51	51
G3XD15_	1123	1123	1011	1011	444	3000	1070	213	187	276	276	156	51	51	51	51	51	51	51	51	51	51	51	51	51	51	51	58	58	110	51	51	51	51	51	51	51	51	51	51	51	68	68	57	58	54	54	51	51
Q9HVM8_pilY1	591	591	433	433	634	1070	3000	80	160	109	109	102	51	51	51	51	51	51	51	51	51	51	51	51	51	51	51	57	69	51	51	51	51	51	51	51	51	51	51	51	51	81	82	53	56	73	73	51	51
G3XCX3_pilU	84	84	93	93	271	213	80	3000	127	218	218	180	51	51	51	51	51	51	51	51	51	51	51	51	51	51	51	103	51	51	51	51	51	51	51	51	51	51	51	51	51	60	162	51	51	72	72	51	51
G3XD51_pilO	62	62	483	483	466	187	160	127	3000	167	167	51	51	51	51	51	51	51	51	51	51	51	51	51	51	51	51	51	51	51	51	51	51	51	51	51	51	51	51	51	51	72	60	51	51	51	51	51	51
P04739_pilA	172	172	227	227	222	276	109	218	167	3000	3000	3000	51	51	51	62	51	51	51	51	51	51	51	51	51	51	51	115	100	64	51	51	51	51	51	51	51	51	51	51	51	112	123	52	51	92	92	51	51
Q9I5G6_	172	172	227	227	222	276	109	218	167	3000	3000	3000	51	51	51	62	51	51	51	51	51	51	51	51	51	51	51	115	100	64	51	51	51	51	51	51	51	51	51	51	51	112	123	52	51	92	92	51	51
Q9I5R2_	96	96	80	80	82	156	102	180	51	3000	3000	3000	51	51	51	51	51	51	51	51	51	51	51	51	51	51	51	133	62	73	51	51	51	51	51	51	51	51	51	51	51	112	118	56	56	91	91	51	51
G3XCV8_	51	51	51	51	51	51	51	51	51	51	51	51	3000	111	111	51	51	51	51	51	51	51	51	51	101	51	51	51	51	51	57	51	91	51	51	51	51	73	57	78	78	51	51	51	51	51	51	51	51
Q9I0H3_norR	51	51	51	51	51	51	51	51	51	51	51	51	111	3000	3000	51	51	51	51	51	51	51	51	51	51	51	57	51	51	51	57	51	58	51	56	51	51	51	51	56	56	51	51	51	51	51	51	51	51
Q9I362_nifA	51	51	51	51	51	51	51	51	51	51	51	51	111	3000	3000	51	51	51	51	51	51	51	51	51	51	51	57	51	51	51	57	51	58	51	56	51	51	51	51	56	56	51	51	51	51	51	51	51	51
G3XD43_pilE	66	66	51	51	51	51	51	51	51	62	62	51	51	51	51	3000	51	51	51	51	51	51	51	51	51	51	51	51	51	51	51	51	51	51	51	51	51	51	51	51	51	51	51	51	51	51	51	51	51
O50274_cysN	51	51	51	51	51	51	51	51	51	51	51	51	51	51	51	51	3000	51	51	51	51	51	51	51	51	51	51	51	51	51	51	51	51	51	51	51	51	51	51	51	51	51	51	51	51	51	51	51	51
Q9HWA2_	51	51	51	51	51	51	51	51	51	51	51	51	51	51	51	51	51	3000	76	51	62	51	51	51	51	58	58	51	51	51	51	51	51	51	51	51	51	74	51	51	51	51	51	51	51	51	51	51	51
Q9I2C1_pqqD	51	51	51	51	51	51	51	51	51	51	51	51	51	51	51	51	51	76	3000	54	51	51	51	51	51	51	51	51	51	51	75	54	56	51	51	51	51	51	56	51	51	51	51	51	51	51	51	51	51
P58040_yeiW	51	51	51	51	51	51	51	51	51	51	51	51	51	51	51	51	51	51	54	3000	65	53	51	51	63	75	57	51	51	51	51	51	51	139	53	57	57	180	57	51	51	51	51	51	51	51	51	51	51
Q9I1U8_	51	51	51	51	51	51	51	51	51	51	51	51	51	51	51	51	51	62	51	65	3000	98	51	51	132	51	84	51	51	51	51	51	51	51	51	51	51	98	51	51	51	51	51	51	51	51	51	51	51
Q9I2D5_	51	51	51	51	51	51	51	51	51	51	51	51	51	51	51	51	51	51	51	53	98	3000	51	51	51	51	51	51	51	51	72	59	74	51	51	73	73	122	73	51	51	51	51	51	51	51	51	51	51
Q9HX50_	51	51	51	51	51	51	51	51	51	51	51	51	51	51	51	51	51	51	51	51	51	51	3000	77	51	51	51	51	51	68	73	72	74	58	75	76	76	73	106	51	51	58	73	79	92	66	66	51	51
Q9HZB9_	51	51	51	51	51	51	51	51	51	51	51	51	51	51	51	51	51	51	51	51	51	51	77	3000	51	51	51	51	51	51	51	51	51	51	51	51	51	51	51	51	51	90	51	74	73	51	51	51	51
Q9HWR9_	51	51	51	51	51	51	51	51	51	51	51	51	101	51	51	51	51	51	51	63	132	51	51	51	3000	173	106	62	51	51	74	51	106	51	51	74	74	107	71	101	101	51	51	51	51	51	51	51	51
Q9HZG7_yqjE	51	51	51	51	51	51	51	51	51	51	51	51	51	51	51	51	51	58	51	75	51	51	51	51	173	3000	106	51	51	51	51	57	51	51	51	53	53	292	51	51	51	51	51	51	51	51	51	51	51
Q9I5Z4_yqjC	51	51	51	51	51	51	51	51	51	51	51	51	51	57	57	51	51	58	51	57	84	51	51	51	106	106	3000	51	51	51	74	51	106	51	57	57	57	119	51	62	62	51	51	51	51	51	51	51	51
Q9HW81_	65	65	51	51	51	58	57	103	51	115	115	133	51	51	51	51	51	51	51	51	51	51	51	51	62	51	51	3000	202	68	51	51	51	51	51	51	51	51	51	51	51	51	73	72	71	73	73	51	51
Q9HXR2_	68	68	51	51	58	58	69	51	51	100	100	62	51	51	51	51	51	51	51	51	51	51	51	51	51	51	51	202	3000	51	51	51	51	51	51	51	51	51	51	51	51	51	51	151	174	51	51	51	51
Q9HZL5_pilZ_1	62	62	51	51	51	110	51	51	51	64	64	73	51	51	51	51	51	51	51	51	51	51	68	51	51	51	51	68	51	3000	51	51	51	51	51	51	51	51	51	51	51	51	73	113	107	62	62	51	51
P11221_oprI	51	51	51	51	51	51	51	51	51	51	51	51	57	57	57	51	51	51	75	51	51	72	73	51	74	51	74	51	51	51	3000	139	139	132	126	161	161	173	209	106	106	51	51	51	51	51	51	51	51
Q9HT93_	51	51	51	51	51	51	51	51	51	51	51	51	51	51	51	51	51	51	54	51	51	59	72	51	51	57	51	51	51	51	139	3000	180	139	115	133	133	211	204	51	51	51	51	51	51	51	51	51	51
Q9HX54_	51	51	51	51	51	51	51	51	51	51	51	51	91	58	58	51	51	51	56	51	51	74	74	51	106	51	106	51	51	51	139	180	3000	270	159	130	130	142	232	143	143	51	51	51	51	54	54	51	51
Q9HZF7_VV12640	51	51	51	51	51	51	51	51	51	51	51	51	51	51	51	51	51	51	51	139	51	51	58	51	51	51	51	51	51	51	132	139	270	3000	119	130	130	130	130	60	60	51	51	51	51	51	51	51	51
Q9HVF2_yajG	51	51	51	51	51	51	51	51	51	51	51	51	51	56	56	51	51	51	51	53	51	51	75	51	51	51	57	51	51	51	126	115	159	119	3000	121	121	130	161	119	119	51	51	51	51	51	51	51	51
Q9HW86_mvaT	51	51	51	51	51	51	51	51	51	51	51	51	51	51	51	51	51	51	51	57	51	73	76	51	74	53	57	51	51	51	161	133	130	130	121	3000	3000	306	157	87	87	51	51	51	51	51	51	51	51
Q9I0H1_mvaT	51	51	51	51	51	51	51	51	51	51	51	51	51	51	51	51	51	51	51	57	51	73	76	51	74	53	57	51	51	51	161	133	130	130	121	3000	3000	306	157	87	87	51	51	51	51	51	51	51	51
Q9I628_	51	51	51	51	51	51	51	51	51	51	51	51	73	51	51	51	51	74	51	180	98	122	73	51	107	292	119	51	51	51	173	211	142	130	130	306	306	3000	220	112	112	51	51	51	51	51	51	52	52
Q9HZJ0_	51	51	51	51	51	51	51	51	51	51	51	51	57	51	51	51	51	51	56	57	51	73	106	51	71	51	51	51	51	51	209	204	232	130	161	157	157	220	3000	384	384	51	51	51	51	51	51	51	51
Q9I133_tyrR	51	51	51	51	51	51	51	51	51	51	51	51	78	56	56	51	51	51	51	51	51	51	51	51	101	51	62	51	51	51	106	51	143	60	119	87	87	112	384	3000	3000	51	51	51	51	51	51	51	51
Q9I572_tyrR	51	51	51	51	51	51	51	51	51	51	51	51	78	56	56	51	51	51	51	51	51	51	51	51	101	51	62	51	51	51	106	51	143	60	119	87	87	112	384	3000	3000	51	51	51	51	51	51	51	51
Q01725_lifO	57	57	51	51	62	68	81	60	72	112	112	112	51	51	51	51	51	51	51	51	51	51	58	90	51	51	51	51	51	51	51	51	51	51	51	51	51	51	51	51	51	3000	156	144	234	159	159	51	51
Q9HUK7_	54	54	51	51	57	68	82	162	60	123	123	118	51	51	51	51	51	51	51	51	51	51	73	51	51	51	51	73	51	73	51	51	51	51	51	51	51	51	51	51	51	156	3000	111	119	130	130	51	51
Q9HWC2_	68	68	51	51	51	57	53	51	51	52	52	56	51	51	51	51	51	51	51	51	51	51	79	74	51	51	51	72	151	113	51	51	51	51	51	51	51	51	51	51	51	144	111	3000	275	73	73	51	51
Q9I014_	68	68	51	51	51	58	56	51	51	51	51	56	51	51	51	51	51	51	51	51	51	51	92	73	51	51	51	71	174	107	51	51	51	51	51	51	51	51	51	51	51	234	119	275	3000	421	421	51	51
Q9HV99_	77	77	51	51	66	54	73	72	51	92	92	91	51	51	51	51	51	51	51	51	51	51	66	51	51	51	51	73	51	62	51	51	54	51	51	51	51	51	51	51	51	159	130	73	421	3000	3000	51	51
Q9HW76_	77	77	51	51	66	54	73	72	51	92	92	91	51	51	51	51	51	51	51	51	51	51	66	51	51	51	51	73	51	62	51	51	54	51	51	51	51	51	51	51	51	159	130	73	421	3000	3000	51	51
Q9I338_	51	51	51	51	51	51	51	51	51	51	51	51	51	51	51	51	51	51	51	51	51	51	51	51	51	51	51	51	51	51	51	51	51	51	51	51	51	52	51	51	51	51	51	51	51	51	51	3000	3000
Q9I4M0_mdoB	51	51	51	51	51	51	51	51	51	51	51	51	51	51	51	51	51	51	51	51	51	51	51	51	51	51	51	51	51	51	51	51	51	51	51	51	51	52	51	51	51	51	51	51	51	51	51	3000	3000
Q9HZF4_	51	51	51	51	51	51	51	51	51	51	51	51	51	51	51	51	51	51	51	51	51	51	51	51	51	51	51	51	51	51	51	51	51	51	51	51	51	51	51	51	51	51	51	51	51	51	51	51	51
Q9I012_	51	51	51	51	51	51	51	51	51	51	51	51	51	51	51	51	51	51	51	51	51	51	51	51	51	51	51	51	51	51	51	51	51	51	51	51	51	51	51	51	51	51	51	51	51	51	51	51	51
Q9HXR1_liaH	51	51	51	51	51	51	51	51	51	51	51	51	51	51	51	51	51	51	51	51	51	51	51	51	51	51	51	51	51	51	51	51	51	51	51	51	51	51	51	51	51	51	51	51	51	51	51	51	51
Q9HXR4_	51	51	51	51	51	51	51	51	51	51	51	51	51	51	51	69	51	51	51	51	51	51	51	51	51	51	51	51	51	51	51	51	51	51	51	51	51	51	51	51	51	51	51	51	51	51	51	51	51
Q9HYZ8_lpxL	51	51	51	51	51	51	51	51	51	74	74	56	51	51	51	51	51	51	51	51	51	51	51	51	51	51	51	51	51	51	51	51	51	51	51	51	51	51	51	51	51	51	51	51	51	51	51	51	51
Q9I7B5_htrB	51	51	51	51	51	51	51	51	51	74	74	56	51	51	51	51	51	51	51	51	51	51	51	51	51	51	51	51	51	51	51	51	51	51	51	51	51	51	51	51	51	51	51	51	51	51	51	51	51
P21482_dsbB	51	51	51	51	51	51	51	51	51	51	51	51	51	51	51	51	51	51	51	51	51	51	51	51	51	51	51	51	51	51	51	51	51	51	51	51	51	51	51	51	51	51	51	51	51	51	51	51	51
P57701_dsbB	51	51	51	51	51	51	51	51	51	51	51	51	51	51	51	51	51	51	51	51	51	51	51	51	51	51	51	51	51	51	51	51	51	51	51	51	51	51	51	51	51	51	51	51	51	51	51	51	51
P42812_lolB	57	57	57	57	62	65	56	62	58	100	100	56	51	51	51	51	51	51	51	53	51	51	51	51	51	51	51	51	51	51	51	51	51	51	51	51	51	51	51	51	51	51	53	51	51	51	51	51	51
Q9HUB9_yigP	58	58	57	57	68	80	56	77	58	114	114	57	51	51	51	51	51	51	51	54	51	51	51	51	51	51	51	51	51	51	51	51	51	51	51	51	51	51	51	51	51	51	73	51	51	51	51	51	51
Q9HVY8_sspB	57	57	57	57	73	62	58	63	57	106	106	56	51	51	51	51	51	51	51	51	51	51	51	51	51	51	51	51	51	51	51	51	51	51	51	51	51	51	51	51	51	51	56	51	51	51	51	51	51
Q9HX36_corC	57	57	54	54	57	62	51	73	57	106	106	56	51	51	51	51	51	51	51	51	51	51	51	51	51	51	51	51	51	51	51	51	51	51	51	51	51	51	51	51	51	51	52	51	51	51	51	51	51
Q9HUW0_fis	57	57	51	51	57	127	51	57	57	117	117	51	51	51	51	51	51	51	51	51	51	51	51	51	51	51	51	51	51	157	51	51	51	51	51	51	51	51	51	51	51	51	51	51	51	51	51	51	51
Q9HTK1_ubiC	51	51	51	51	51	57	51	51	53	55	55	51	51	51	51	57	51	51	51	51	51	51	51	54	51	51	51	51	51	73	51	51	51	51	51	51	51	51	51	51	51	51	51	51	51	51	51	51	51
Q9HU56_secB	51	51	51	51	53	57	51	53	51	78	78	55	51	51	51	51	51	51	51	51	51	51	51	51	51	51	51	51	51	51	51	51	51	51	51	51	51	51	51	51	51	51	51	51	51	51	51	51	51
Q9I5G9_sdhE	51	51	51	51	51	57	51	57	51	101	101	57	51	51	51	51	51	51	51	51	51	51	51	51	51	51	51	51	51	51	51	51	51	51	51	51	51	51	51	51	51	51	51	51	51	51	51	51	51
Q9I4W2_bamC	51	51	51	51	53	58	51	57	51	104	104	53	51	51	51	51	51	51	51	53	51	51	51	51	51	57	51	51	51	51	51	51	51	51	51	51	51	51	51	51	51	51	51	51	51	51	51	51	51
Q9HT82_scyA	62	62	57	57	62	143	62	64	60	100	100	51	51	51	51	51	51	51	51	51	51	51	62	51	51	51	51	51	51	90	51	51	51	51	51	51	51	51	51	51	51	51	70	56	57	51	51	51	51
Q9HTM7_	62	62	57	57	62	143	62	64	60	100	100	51	51	51	51	51	51	51	51	51	51	51	62	51	51	51	51	51	51	90	51	51	51	51	51	51	51	51	51	51	51	51	70	56	57	51	51	51	51
Q9HTQ4_cycB	62	62	57	57	62	143	62	64	60	100	100	51	51	51	51	51	51	51	51	51	51	51	62	51	51	51	51	51	51	90	51	51	51	51	51	51	51	51	51	51	51	51	70	56	57	51	51	51	51
Q9HT99_rtcB	51	51	51	51	51	51	51	51	51	125	125	158	51	51	51	51	51	51	51	51	51	51	51	51	51	51	51	51	81	51	51	51	51	51	51	51	51	51	51	51	51	51	51	51	51	51	51	51	51
Q9HVK1_rtcB	51	51	51	51	51	51	51	51	51	125	125	158	51	51	51	51	51	51	51	51	51	51	51	51	51	51	51	51	81	51	51	51	51	51	51	51	51	51	51	51	51	51	51	51	51	51	51	51	51
Q9HVK3_rtcR	51	51	53	53	53	51	80	51	51	172	172	219	51	51	51	51	51	51	51	51	51	51	51	51	51	51	51	224	196	51	51	51	51	51	51	51	51	51	51	51	51	51	51	51	51	51	51	51	51
Q9HYZ9_	54	54	51	51	53	86	84	51	51	51	51	51	51	51	51	51	51	51	51	51	51	51	51	51	51	51	51	51	51	51	51	51	51	51	51	51	51	51	51	51	51	152	51	51	51	51	51	51	51
Q9I0H8_	54	54	51	51	53	86	84	51	51	51	51	51	51	51	51	51	51	51	51	51	51	51	51	51	51	51	51	51	51	51	51	51	51	51	51	51	51	51	51	51	51	152	51	51	51	51	51	51	51
Q9I385_rssA	54	54	51	51	53	86	84	51	51	51	51	51	51	51	51	51	51	51	51	51	51	51	51	51	51	51	51	51	51	51	51	51	51	51	51	51	51	51	51	51	51	152	51	51	51	51	51	51	51
Q9I059_	51	51	51	51	51	51	51	51	51	51	51	51	51	51	51	51	51	51	51	51	51	51	51	51	51	51	51	51	51	51	51	51	51	51	51	51	51	51	51	51	51	51	51	51	51	51	51	51	51
Q9HYZ5_minE	54	54	51	51	51	51	51	51	57	55	55	51	51	51	51	51	51	51	51	57	51	51	51	51	51	51	51	51	51	51	51	51	51	51	51	51	51	51	51	51	51	51	51	51	51	51	51	51	51
Q9HYZ6_minD	51	51	51	51	51	51	51	51	55	51	51	51	51	51	51	51	51	51	51	51	51	51	51	51	51	51	51	51	51	51	51	51	51	51	51	51	51	51	51	51	51	51	51	51	51	51	51	51	51
Q9HYZ7_minC	51	51	51	51	51	51	51	51	57	51	51	51	51	51	51	51	51	51	51	52	51	51	51	51	51	51	51	51	51	51	51	51	51	51	51	51	51	51	51	51	51	51	51	51	51	51	51	51	51
Q9HZG8_	51	51	51	51	51	51	51	51	51	51	51	51	51	51	51	51	51	58	73	58	51	51	51	51	132	195	100	51	51	51	123	51	57	51	51	51	51	110	51	51	51	51	51	51	51	51	51	51	51
Q9I089_	51	51	51	51	51	51	51	51	51	51	51	51	51	51	51	51	51	58	73	58	51	51	51	51	132	195	100	51	51	51	123	51	57	51	51	51	51	110	51	51	51	51	51	51	51	51	51	51	51
Q9I421_	51	51	51	51	51	51	51	51	51	51	51	51	51	51	51	51	51	58	73	58	51	51	51	51	132	195	100	51	51	51	123	51	57	51	51	51	51	110	51	51	51	51	51	51	51	51	51	51	51
P25060_gspL	135	135	58	58	51	114	62	51	51	135	135	57	51	51	51	51	51	51	51	51	51	51	51	51	51	51	51	51	51	60	51	51	51	51	51	51	51	51	51	51	51	90	57	108	109	51	51	51	51
Q9I5P2_gspL	135	135	58	58	51	114	62	51	51	135	135	57	51	51	51	51	51	51	51	51	51	51	51	51	51	51	51	51	51	60	51	51	51	51	51	51	51	51	51	51	51	90	57	108	109	51	51	51	51
P25061_gspM	123	123	81	81	53	113	94	51	51	68	68	65	51	51	51	51	51	51	51	51	51	51	51	53	51	51	51	51	51	119	51	51	51	51	51	51	51	51	51	51	51	90	62	112	112	51	51	51	51
Q9I5P1_gspM	123	123	81	81	53	113	94	51	51	68	68	65	51	51	51	51	51	51	51	51	51	51	51	53	51	51	51	51	51	119	51	51	51	51	51	51	51	51	51	51	51	90	62	112	112	51	51	51	51
Q51575_gspC	56	56	57	57	121	71	113	51	51	57	57	51	51	51	51	51	51	51	51	51	51	51	51	51	51	51	51	51	66	51	51	51	51	51	51	51	51	51	51	51	51	86	68	58	58	51	51	51	51
Q9I2M8_xcsC	56	56	57	57	121	71	113	51	51	57	57	51	51	51	51	51	51	51	51	51	51	51	51	51	51	51	51	51	66	51	51	51	51	51	51	51	51	51	51	51	51	86	68	58	58	51	51	51	51
G3XCT5_pilK	51	51	51	51	51	51	51	51	51	51	51	51	51	51	51	51	51	51	51	51	51	51	51	51	51	51	51	51	51	51	51	51	51	51	51	51	51	51	51	51	51	51	51	51	51	51	51	51	51
Q9I6V7_cheR	51	51	51	51	51	51	51	51	51	51	51	51	51	51	51	51	51	51	51	51	51	51	51	51	51	51	51	51	51	51	51	51	51	51	51	51	51	51	51	51	51	51	51	51	51	51	51	51	51
O87131_cheR	51	51	51	51	51	51	51	51	51	51	51	51	51	51	51	51	51	51	51	51	51	51	51	51	51	51	51	51	51	51	51	51	51	51	51	51	51	51	51	51	51	51	51	51	51	51	51	51	51
Q9HXT5_wspC	51	51	51	51	51	51	55	51	51	51	51	51	51	51	51	51	51	51	51	51	51	51	51	51	51	51	51	51	51	51	51	51	51	51	51	51	51	51	51	51	51	51	51	51	51	51	51	51	51
G3XD73_motC	51	51	51	51	51	51	51	51	51	51	51	51	51	51	51	51	51	51	51	51	51	51	51	51	51	51	51	51	51	51	51	51	51	51	51	51	51	51	51	51	51	51	51	51	51	51	51	51	51
Q9HUL1_motA	51	51	51	51	51	51	51	51	51	51	51	51	51	51	51	51	51	51	51	51	51	51	51	51	51	51	51	51	51	51	51	51	51	51	51	51	51	51	51	51	51	51	51	51	51	51	51	51	51
G3XD90_motB	51	51	51	51	51	51	51	51	51	51	51	51	51	51	51	51	51	51	51	51	51	51	51	51	51	51	51	51	51	51	51	51	51	51	51	51	51	51	51	51	51	51	51	51	51	51	51	51	51
Q9HUL2_motB	51	51	51	51	51	51	51	51	51	51	51	51	51	51	51	51	51	51	51	51	51	51	51	51	51	51	51	51	51	51	51	51	51	51	51	51	51	51	51	51	51	51	51	51	51	51	51	51	51
P72151_flaB	51	51	51	51	51	51	51	51	51	51	51	51	51	51	51	51	51	51	51	51	51	51	51	51	51	51	51	51	51	51	51	51	51	51	51	51	51	51	51	51	51	51	51	51	51	51	51	51	51
Q9I4P2_flgL	51	51	51	51	51	51	51	51	51	51	51	51	51	51	51	51	51	51	51	51	51	51	51	51	51	51	51	51	51	51	51	51	51	51	51	51	51	51	51	51	51	51	51	51	51	51	51	51	51
Q9HTV7_fliL	51	51	51	51	51	51	51	51	51	51	51	51	53	51	51	51	51	51	51	51	51	51	51	51	51	51	51	51	51	51	51	51	51	53	51	51	51	51	51	51	51	51	51	51	51	51	51	51	51
Q9I3Q5_fliL	51	51	51	51	51	51	51	51	51	51	51	51	53	51	51	51	51	51	51	51	51	51	51	51	51	51	51	51	51	51	51	51	51	53	51	51	51	51	51	51	51	51	51	51	51	51	51	51	51
Q51464_fliG	51	51	51	51	51	51	51	51	51	51	51	51	51	51	51	51	51	51	51	51	51	51	51	51	51	51	51	51	51	51	51	51	51	51	51	51	51	51	51	51	51	51	51	51	51	51	51	51	51
Q9I4P4_flgJ	51	51	51	51	51	51	51	51	51	51	51	51	51	51	51	51	51	51	51	57	51	51	51	51	51	51	51	51	51	51	51	51	51	51	51	51	51	51	51	51	51	51	51	51	51	51	51	51	51
Q9I3N8_fliK1	51	51	51	51	51	51	51	51	51	51	51	51	51	51	51	51	51	51	51	51	51	51	51	51	51	57	51	51	51	51	51	51	51	51	51	51	51	51	51	51	51	51	51	51	51	51	51	51	51
Q9I3Q6_fliK	51	51	51	51	51	51	51	51	51	51	51	51	51	51	51	51	51	51	51	51	51	51	51	51	51	57	51	51	51	51	51	51	51	51	51	51	51	51	51	51	51	51	51	51	51	51	51	51	51
Q51467_fliO	51	51	51	51	51	51	51	51	51	51	51	51	51	51	51	51	51	51	51	51	51	51	51	51	51	51	51	51	51	51	51	51	51	51	51	51	51	51	51	51	51	51	51	51	51	51	51	51	51
Q9I4N0_fliJ	51	51	51	51	51	51	51	51	51	51	51	51	51	51	51	51	51	51	51	57	51	51	51	51	51	51	51	51	51	51	51	51	51	51	51	51	51	51	51	51	51	51	51	51	51	51	51	51	51
Q9I3P8_flhF	51	51	51	51	51	51	51	51	51	51	51	51	51	51	51	51	51	51	51	51	51	51	51	51	51	51	51	51	51	51	51	51	51	51	51	51	51	51	51	51	51	51	51	51	51	51	51	51	51
G3XD28_pilM	66	66	456	456	67	187	67	57	588	337	337	51	51	51	51	98	51	51	51	51	51	51	51	51	51	51	51	51	51	51	51	51	51	51	51	51	51	51	51	51	51	53	51	51	51	51	51	51	51
G3XD30_pilN	893	893	505	505	451	114	66	87	494	104	104	54	51	51	51	51	51	51	51	51	51	51	51	51	51	51	51	51	51	51	51	51	51	51	51	51	51	51	51	51	51	51	51	51	51	68	68	51	51
P22608_pilB	210	210	209	209	62	62	63	57	66	88	88	53	51	51	51	116	51	51	51	51	51	51	51	51	51	51	51	51	51	51	51	51	51	51	51	51	51	51	51	51	51	80	51	51	51	51	51	51	51
Q9I0G1_	210	210	209	209	62	62	63	57	66	88	88	53	51	51	51	116	51	51	51	51	51	51	51	51	51	51	51	51	51	51	51	51	51	51	51	51	51	51	51	51	51	80	51	51	51	51	51	51	51
Q9I5N9_gspE	210	210	209	209	62	62	63	57	66	88	88	53	51	51	51	116	51	51	51	51	51	51	51	51	51	51	51	51	51	51	51	51	51	51	51	51	51	51	51	51	51	80	51	51	51	51	51	51	51
Q00512_gspE	210	210	209	209	62	62	63	57	66	88	88	53	51	51	51	116	51	51	51	51	51	51	51	51	51	51	51	51	51	51	51	51	51	51	51	51	51	51	51	51	51	80	51	51	51	51	51	51	51
Q9HTY0_gspE	210	210	209	209	62	62	63	57	66	88	88	53	51	51	51	116	51	51	51	51	51	51	51	51	51	51	51	51	51	51	51	51	51	51	51	51	51	51	51	51	51	80	51	51	51	51	51	51	51
P22609_pilC	66	66	63	63	51	62	51	57	66	319	319	52	51	51	51	101	51	51	51	51	51	51	51	51	51	51	51	51	51	51	51	51	51	51	51	51	51	51	51	51	51	51	51	51	51	51	51	51	51
Q9I0G2_	66	66	63	63	51	62	51	57	66	319	319	52	51	51	51	101	51	51	51	51	51	51	51	51	51	51	51	51	51	51	51	51	51	51	51	51	51	51	51	51	51	51	51	51	51	51	51	51	51
Q9I5N8_gspF	66	66	63	63	51	62	51	57	66	319	319	52	51	51	51	101	51	51	51	51	51	51	51	51	51	51	51	51	51	51	51	51	51	51	51	51	51	51	51	51	51	51	51	51	51	51	51	51	51
Q00513_gspF	66	66	63	63	51	62	51	57	66	319	319	52	51	51	51	101	51	51	51	51	51	51	51	51	51	51	51	51	51	51	51	51	51	51	51	51	51	51	51	51	51	51	51	51	51	51	51	51	51
G3XD24_pctA	51	51	51	51	51	51	51	51	51	51	51	51	72	51	51	51	51	51	51	51	51	51	51	51	51	51	51	51	51	51	51	51	51	51	51	51	51	51	51	51	51	51	51	51	51	51	51	51	51
Q9I6V2_	51	51	51	51	51	51	51	51	51	51	51	51	72	51	51	51	51	51	51	51	51	51	51	51	51	51	51	51	51	51	51	51	51	51	51	51	51	51	51	51	51	51	51	51	51	51	51	51	51
Q9I6V6_aer2	51	51	51	51	51	51	51	51	51	51	51	51	72	51	51	51	51	51	51	51	51	51	51	51	51	51	51	51	51	51	51	51	51	51	51	51	51	51	51	51	51	51	51	51	51	51	51	51	51
G3XDA3_ctpH	51	51	51	51	51	51	51	51	51	51	51	51	72	51	51	51	51	51	51	51	51	51	51	51	51	51	51	51	51	51	51	51	51	51	51	51	51	51	51	51	51	51	51	51	51	51	51	51	51
P42257_pilJ	51	51	51	51	51	51	51	51	51	51	51	51	72	51	51	51	51	51	51	51	51	51	51	51	51	51	51	51	51	51	51	51	51	51	51	51	51	51	51	51	51	51	51	51	51	51	51	51	51
Q9HUB1_	51	51	51	51	51	51	51	51	51	51	51	51	72	51	51	51	51	51	51	51	51	51	51	51	51	51	51	51	51	51	51	51	51	51	51	51	51	51	51	51	51	51	51	51	51	51	51	51	51
Q9HUP8_	51	51	51	51	51	51	51	51	51	51	51	51	72	51	51	51	51	51	51	51	51	51	51	51	51	51	51	51	51	51	51	51	51	51	51	51	51	51	51	51	51	51	51	51	51	51	51	51	51
Q9HUW6_ctpL	51	51	51	51	51	51	51	51	51	51	51	51	72	51	51	51	51	51	51	51	51	51	51	51	51	51	51	51	51	51	51	51	51	51	51	51	51	51	51	51	51	51	51	51	51	51	51	51	51
Q9HVF8_	51	51	51	51	51	51	51	51	51	51	51	51	72	51	51	51	51	51	51	51	51	51	51	51	51	51	51	51	51	51	51	51	51	51	51	51	51	51	51	51	51	51	51	51	51	51	51	51	51
Q9HVQ2_	51	51	51	51	51	51	51	51	51	51	51	51	72	51	51	51	51	51	51	51	51	51	51	51	51	51	51	51	51	51	51	51	51	51	51	51	51	51	51	51	51	51	51	51	51	51	51	51	51
Q9HXT3_wspA	51	51	51	51	51	51	51	51	51	51	51	51	72	51	51	51	51	51	51	51	51	51	51	51	51	51	51	51	51	51	51	51	51	51	51	51	51	51	51	51	51	51	51	51	51	51	51	51	51
Q9HW91_pctA	51	51	51	51	51	51	51	51	51	51	51	51	72	51	51	51	51	51	51	51	51	51	51	51	51	51	51	51	51	51	51	51	51	51	51	51	51	51	51	51	51	51	51	51	51	51	51	51	51
Q9HZX9_	51	51	51	51	51	51	51	51	51	51	51	51	72	51	51	51	51	51	51	51	51	51	51	51	51	51	51	51	51	51	51	51	51	51	51	51	51	51	51	51	51	51	51	51	51	51	51	51	51
Q9HW93_pctC	51	51	51	51	51	51	51	51	51	51	51	51	72	51	51	51	51	51	51	51	51	51	51	51	51	51	51	51	51	51	51	51	51	51	51	51	51	51	51	51	51	51	51	51	51	51	51	51	51
Q9I0R3_	51	51	51	51	51	51	51	51	51	51	51	51	72	51	51	51	51	51	51	51	51	51	51	51	51	51	51	51	51	51	51	51	51	51	51	51	51	51	51	51	51	51	51	51	51	51	51	51	51
Q9HWB0_MA20_17940	51	51	51	51	51	51	51	51	51	51	51	51	72	51	51	51	51	51	51	51	51	51	51	51	51	51	51	51	51	51	51	51	51	51	51	51	51	51	51	51	51	51	51	51	51	51	51	51	51
Q9I0I4_	51	51	51	51	51	51	51	51	51	51	51	51	72	51	51	51	51	51	51	51	51	51	51	51	51	51	51	51	51	51	51	51	51	51	51	51	51	51	51	51	51	51	51	51	51	51	51	51	51
Q9HZS7_	51	51	51	51	51	51	51	51	51	51	51	51	72	51	51	51	51	51	51	51	51	51	51	51	51	51	51	51	51	51	51	51	51	51	51	51	51	51	51	51	51	51	51	51	51	51	51	51	51
Q9I379_	51	51	51	51	51	51	51	51	51	51	51	51	72	51	51	51	51	51	51	51	51	51	51	51	51	51	51	51	51	51	51	51	51	51	51	51	51	51	51	51	51	51	51	51	51	51	51	51	51
Q9I3B3_	51	51	51	51	51	51	51	51	51	51	51	51	72	51	51	51	51	51	51	51	51	51	51	51	51	51	51	51	51	51	51	51	51	51	51	51	51	51	51	51	51	51	51	51	51	51	51	51	51
Q9I3F6_aer-2	51	51	51	51	51	51	51	51	51	51	51	51	72	51	51	51	51	51	51	51	51	51	51	51	51	51	51	51	51	51	51	51	51	51	51	51	51	51	51	51	51	51	51	51	51	51	51	51	51
Q9I3S1_bdlA	51	51	51	51	51	51	51	51	51	51	51	51	72	51	51	51	51	51	51	51	51	51	51	51	51	51	51	51	51	51	51	51	51	51	51	51	51	51	51	51	51	51	51	51	51	51	51	51	51
Q9I493_	51	51	51	51	51	51	51	51	51	51	51	51	72	51	51	51	51	51	51	51	51	51	51	51	51	51	51	51	51	51	51	51	51	51	51	51	51	51	51	51	51	51	51	51	51	51	51	51	51
Q9I0I6_	51	51	51	51	51	51	51	51	51	51	51	51	95	53	53	51	51	51	51	51	51	51	51	51	51	51	51	51	51	51	51	51	51	51	51	51	51	51	51	51	51	51	51	51	51	51	51	51	51
[truncated: 93 more columns]

## Sheet: SD50
	G3XCZ0_fimT	Q9HVN0_fimT	G3XD84_pilV	Q9I0G5_	G3XCX7_pilP	G3XD15_	Q9HVM8_pilY1	G3XCX3_pilU	G3XD51_pilO	P04739_pilA	Q9I5G6_	Q9I5R2_	G3XCV8_	Q9I0H3_norR	Q9I362_nifA	G3XD43_pilE	O50274_cysN	Q9HWA2_	Q9I2C1_pqqD	P58040_yeiW	Q9I1U8_	Q9I2D5_	Q9HX50_	Q9HZB9_	Q9HWR9_	Q9HZG7_yqjE	Q9I5Z4_yqjC	Q9HW81_	Q9HXR2_	Q9HZL5_pilZ_1	P11221_oprI	Q9HT93_	Q9HX54_	Q9HZF7_VV12640	Q9HVF2_yajG	Q9HW86_mvaT	Q9I0H1_mvaT	Q9I628_	Q9HZJ0_	Q9I133_tyrR	Q9I572_tyrR	Q01725_lifO	Q9HUK7_	Q9HWC2_	Q9I014_	Q9HV99_	Q9HW76_	Q9I338_	Q9I4M0_mdoB
G3XCZ0_fimT	1	1	1	1	1	1	1	1	1	1	1	1	1	1	1	1	1	1	1	1	1	1	1	1	1	1	1	1	1	1	1	1	1	1	1	1	1	1	1	1	1	1	1	1	1	1	1	1	1
Q9HVN0_fimT	1	1	1	1	1	1	1	1	1	1	1	1	1	1	1	1	1	1	1	1	1	1	1	1	1	1	1	1	1	1	1	1	1	1	1	1	1	1	1	1	1	1	1	1	1	1	1	1	1
G3XD84_pilV	1	1	1	1	1	1	1	1	1	1	1	1	1	1	1	1	1	1	1	1	1	1	1	1	1	1	1	1	1	1	1	1	1	1	1	1	1	1	1	1	1	1	1	1	1	1	1	1	1
Q9I0G5_	1	1	1	1	1	1	1	1	1	1	1	1	1	1	1	1	1	1	1	1	1	1	1	1	1	1	1	1	1	1	1	1	1	1	1	1	1	1	1	1	1	1	1	1	1	1	1	1	1
G3XCX7_pilP	1	1	1	1	1	1	1	1	1	1	1	1	1	1	1	1	1	1	1	1	1	1	1	1	1	1	1	1	1	1	1	1	1	1	1	1	1	1	1	1	1	1	1	1	1	1	1	1	1
G3XD15_	1	1	1	1	1	1	1	1	1	1	1	1	1	1	1	1	1	1	1	1	1	1	1	1	1	1	1	1	1	1	1	1	1	1	1	1	1	1	1	1	1	1	1	1	1	1	1	1	1
Q9HVM8_pilY1	1	1	1	1	1	1	1	1	1	1	1	1	1	1	1	1	1	1	1	1	1	1	1	1	1	1	1	1	1	1	1	1	1	1	1	1	1	1	1	1	1	1	1	1	1	1	1	1	1
G3XCX3_pilU	1	1	1	1	1	1	1	1	1	1	1	1	1	1	1	1	1	1	1	1	1	1	1	1	1	1	1	1	1	1	1	1	1	1	1	1	1	1	1	1	1	1	1	1	1	1	1	1	1
G3XD51_pilO	1	1	1	1	1	1	1	1	1	1	1	1	1	1	1	1	1	1	1	1	1	1	1	1	1	1	1	1	1	1	1	1	1	1	1	1	1	1	1	1	1	1	1	1	1	1	1	1	1
P04739_pilA	1	1	1	1	1	1	1	1	1	1	1	1	1	1	1	1	1	1	1	1	1	1	1	1	1	1	1	1	1	1	1	1	1	1	1	1	1	1	1	1	1	1	1	1	1	1	1	1	1
Q9I5G6_	1	1	1	1	1	1	1	1	1	1	1	1	1	1	1	1	1	1	1	1	1	1	1	1	1	1	1	1	1	1	1	1	1	1	1	1	1	1	1	1	1	1	1	1	1	1	1	1	1
Q9I5R2_	1	1	1	1	1	1	1	1	1	1	1	1	1	1	1	1	1	1	1	1	1	1	1	1	1	1	1	1	1	1	1	1	1	1	1	1	1	1	1	1	1	1	1	1	1	1	1	1	1
G3XCV8_	1	1	1	1	1	1	1	1	1	1	1	1	1	1	1	1	1	1	1	1	1	1	1	1	1	1	1	1	1	1	1	1	1	1	1	1	1	1	1	1	1	1	1	1	1	1	1	1	1
Q9I0H3_norR	1	1	1	1	1	1	1	1	1	1	1	1	1	1	1	1	1	1	1	1	1	1	1	1	1	1	1	1	1	1	1	1	1	1	1	1	1	1	1	1	1	1	1	1	1	1	1	1	1
Q9I362_nifA	1	1	1	1	1	1	1	1	1	1	1	1	1	1	1	1	1	1	1	1	1	1	1	1	1	1	1	1	1	1	1	1	1	1	1	1	1	1	1	1	1	1	1	1	1	1	1	1	1
G3XD43_pilE	1	1	1	1	1	1	1	1	1	1	1	1	1	1	1	1	1	1	1	1	1	1	1	1	1	1	1	1	1	1	1	1	1	1	1	1	1	1	1	1	1	1	1	1	1	1	1	1	1
O50274_cysN	1	1	1	1	1	1	1	1	1	1	1	1	1	1	1	1	1	1	1	1	1	1	1	1	1	1	1	1	1	1	1	1	1	1	1	1	1	1	1	1	1	1	1	1	1	1	1	1	1
Q9HWA2_	1	1	1	1	1	1	1	1	1	1	1	1	1	1	1	1	1	1	1	1	1	1	1	1	1	1	1	1	1	1	1	1	1	1	1	1	1	1	1	1	1	1	1	1	1	1	1	1	1
Q9I2C1_pqqD	1	1	1	1	1	1	1	1	1	1	1	1	1	1	1	1	1	1	1	1	1	1	1	1	1	1	1	1	1	1	1	1	1	1	1	1	1	1	1	1	1	1	1	1	1	1	1	1	1
P58040_yeiW	1	1	1	1	1	1	1	1	1	1	1	1	1	1	1	1	1	1	1	1	1	1	1	1	1	1	1	1	1	1	1	1	1	1	1	1	1	1	1	1	1	1	1	1	1	1	1	1	1
Q9I1U8_	1	1	1	1	1	1	1	1	1	1	1	1	1	1	1	1	1	1	1	1	1	1	1	1	1	1	1	1	1	1	1	1	1	1	1	1	1	1	1	1	1	1	1	1	1	1	1	1	1
Q9I2D5_	1	1	1	1	1	1	1	1	1	1	1	1	1	1	1	1	1	1	1	1	1	1	1	1	1	1	1	1	1	1	1	1	1	1	1	1	1	1	1	1	1	1	1	1	1	1	1	1	1
Q9HX50_	1	1	1	1	1	1	1	1	1	1	1	1	1	1	1	1	1	1	1	1	1	1	1	1	1	1	1	1	1	1	1	1	1	1	1	1	1	1	1	1	1	1	1	1	1	1	1	1	1
Q9HZB9_	1	1	1	1	1	1	1	1	1	1	1	1	1	1	1	1	1	1	1	1	1	1	1	1	1	1	1	1	1	1	1	1	1	1	1	1	1	1	1	1	1	1	1	1	1	1	1	1	1
Q9HWR9_	1	1	1	1	1	1	1	1	1	1	1	1	1	1	1	1	1	1	1	1	1	1	1	1	1	1	1	1	1	1	1	1	1	1	1	1	1	1	1	1	1	1	1	1	1	1	1	1	1
Q9HZG7_yqjE	1	1	1	1	1	1	1	1	1	1	1	1	1	1	1	1	1	1	1	1	1	1	1	1	1	1	1	1	1	1	1	1	1	1	1	1	1	1	1	1	1	1	1	1	1	1	1	1	1
Q9I5Z4_yqjC	1	1	1	1	1	1	1	1	1	1	1	1	1	1	1	1	1	1	1	1	1	1	1	1	1	1	1	1	1	1	1	1	1	1	1	1	1	1	1	1	1	1	1	1	1	1	1	1	1
Q9HW81_	1	1	1	1	1	1	1	1	1	1	1	1	1	1	1	1	1	1	1	1	1	1	1	1	1	1	1	1	1	1	1	1	1	1	1	1	1	1	1	1	1	1	1	1	1	1	1	1	1
Q9HXR2_	1	1	1	1	1	1	1	1	1	1	1	1	1	1	1	1	1	1	1	1	1	1	1	1	1	1	1	1	1	1	1	1	1	1	1	1	1	1	1	1	1	1	1	1	1	1	1	1	1
Q9HZL5_pilZ_1	1	1	1	1	1	1	1	1	1	1	1	1	1	1	1	1	1	1	1	1	1	1	1	1	1	1	1	1	1	1	1	1	1	1	1	1	1	1	1	1	1	1	1	1	1	1	1	1	1
P11221_oprI	1	1	1	1	1	1	1	1	1	1	1	1	1	1	1	1	1	1	1	1	1	1	1	1	1	1	1	1	1	1	1	1	1	1	1	1	1	1	1	1	1	1	1	1	1	1	1	1	1
Q9HT93_	1	1	1	1	1	1	1	1	1	1	1	1	1	1	1	1	1	1	1	1	1	1	1	1	1	1	1	1	1	1	1	1	1	1	1	1	1	1	1	1	1	1	1	1	1	1	1	1	1
Q9HX54_	1	1	1	1	1	1	1	1	1	1	1	1	1	1	1	1	1	1	1	1	1	1	1	1	1	1	1	1	1	1	1	1	1	1	1	1	1	1	1	1	1	1	1	1	1	1	1	1	1
Q9HZF7_VV12640	1	1	1	1	1	1	1	1	1	1	1	1	1	1	1	1	1	1	1	1	1	1	1	1	1	1	1	1	1	1	1	1	1	1	1	1	1	1	1	1	1	1	1	1	1	1	1	1	1
Q9HVF2_yajG	1	1	1	1	1	1	1	1	1	1	1	1	1	1	1	1	1	1	1	1	1	1	1	1	1	1	1	1	1	1	1	1	1	1	1	1	1	1	1	1	1	1	1	1	1	1	1	1	1
Q9HW86_mvaT	1	1	1	1	1	1	1	1	1	1	1	1	1	1	1	1	1	1	1	1	1	1	1	1	1	1	1	1	1	1	1	1	1	1	1	1	1	1	1	1	1	1	1	1	1	1	1	1	1
Q9I0H1_mvaT	1	1	1	1	1	1	1	1	1	1	1	1	1	1	1	1	1	1	1	1	1	1	1	1	1	1	1	1	1	1	1	1	1	1	1	1	1	1	1	1	1	1	1	1	1	1	1	1	1
Q9I628_	1	1	1	1	1	1	1	1	1	1	1	1	1	1	1	1	1	1	1	1	1	1	1	1	1	1	1	1	1	1	1	1	1	1	1	1	1	1	1	1	1	1	1	1	1	1	1	1	1
Q9HZJ0_	1	1	1	1	1	1	1	1	1	1	1	1	1	1	1	1	1	1	1	1	1	1	1	1	1	1	1	1	1	1	1	1	1	1	1	1	1	1	1	1	1	1	1	1	1	1	1	1	1
Q9I133_tyrR	1	1	1	1	1	1	1	1	1	1	1	1	1	1	1	1	1	1	1	1	1	1	1	1	1	1	1	1	1	1	1	1	1	1	1	1	1	1	1	1	1	1	1	1	1	1	1	1	1
Q9I572_tyrR	1	1	1	1	1	1	1	1	1	1	1	1	1	1	1	1	1	1	1	1	1	1	1	1	1	1	1	1	1	1	1	1	1	1	1	1	1	1	1	1	1	1	1	1	1	1	1	1	1
Q01725_lifO	1	1	1	1	1	1	1	1	1	1	1	1	1	1	1	1	1	1	1	1	1	1	1	1	1	1	1	1	1	1	1	1	1	1	1	1	1	1	1	1	1	1	1	1	1	1	1	1	1
Q9HUK7_	1	1	1	1	1	1	1	1	1	1	1	1	1	1	1	1	1	1	1	1	1	1	1	1	1	1	1	1	1	1	1	1	1	1	1	1	1	1	1	1	1	1	1	1	1	1	1	1	1
Q9HWC2_	1	1	1	1	1	1	1	1	1	1	1	1	1	1	1	1	1	1	1	1	1	1	1	1	1	1	1	1	1	1	1	1	1	1	1	1	1	1	1	1	1	1	1	1	1	1	1	1	1
Q9I014_	1	1	1	1	1	1	1	1	1	1	1	1	1	1	1	1	1	1	1	1	1	1	1	1	1	1	1	1	1	1	1	1	1	1	1	1	1	1	1	1	1	1	1	1	1	1	1	1	1
Q9HV99_	1	1	1	1	1	1	1	1	1	1	1	1	1	1	1	1	1	1	1	1	1	1	1	1	1	1	1	1	1	1	1	1	1	1	1	1	1	1	1	1	1	1	1	1	1	1	1	1	1
Q9HW76_	1	1	1	1	1	1	1	1	1	1	1	1	1	1	1	1	1	1	1	1	1	1	1	1	1	1	1	1	1	1	1	1	1	1	1	1	1	1	1	1	1	1	1	1	1	1	1	1	1
Q9I338_	1	1	1	1	1	1	1	1	1	1	1	1	1	1	1	1	1	1	1	1	1	1	1	1	1	1	1	1	1	1	1	1	1	1	1	1	1	1	1	1	1	1	1	1	1	1	1	1	1
Q9I4M0_mdoB	1	1	1	1	1	1	1	1	1	1	1	1	1	1	1	1	1	1	1	1	1	1	1	1	1	1	1	1	1	1	1	1	1	1	1	1	1	1	1	1	1	1	1	1	1	1	1	1	1
Q9HZF4_	1	1	1	1	1	1	1	1	1	1	1	1	1	1	1	1	1	1	1	1	1	1	1	1	1	1	1	1	1	1	1	1	1	1	1	1	1	1	1	1	1	1	1	1	1	1	1	1	1
Q9I012_	1	1	1	1	1	1	1	1	1	1	1	1	1	1	1	1	1	1	1	1	1	1	1	1	1	1	1	1	1	1	1	1	1	1	1	1	1	1	1	1	1	1	1	1	1	1	1	1	1
Q9HXR1_liaH	1	1	1	1	1	1	1	1	1	1	1	1	1	1	1	1	1	1	1	1	1	1	1	1	1	1	1	1	1	1	1	1	1	1	1	1	1	1	1	1	1	1	1	1	1	1	1	1	1
Q9HXR4_	1	1	1	1	1	1	1	1	1	1	1	1	1	1	1	1	1	1	1	1	1	1	1	1	1	1	1	1	1	1	1	1	1	1	1	1	1	1	1	1	1	1	1	1	1	1	1	1	1
Q9HYZ8_lpxL	1	1	1	1	1	1	1	1	1	1	1	1	1	1	1	1	1	1	1	1	1	1	1	1	1	1	1	1	1	1	1	1	1	1	1	1	1	1	1	1	1	1	1	1	1	1	1	1	1
Q9I7B5_htrB	1	1	1	1	1	1	1	1	1	1	1	1	1	1	1	1	1	1	1	1	1	1	1	1	1	1	1	1	1	1	1	1	1	1	1	1	1	1	1	1	1	1	1	1	1	1	1	1	1
P21482_dsbB	1	1	1	1	1	1	1	1	1	1	1	1	1	1	1	1	1	1	1	1	1	1	1	1	1	1	1	1	1	1	1	1	1	1	1	1	1	1	1	1	1	1	1	1	1	1	1	1	1
P57701_dsbB	1	1	1	1	1	1	1	1	1	1	1	1	1	1	1	1	1	1	1	1	1	1	1	1	1	1	1	1	1	1	1	1	1	1	1	1	1	1	1	1	1	1	1	1	1	1	1	1	1
P42812_lolB	1	1	1	1	1	1	1	1	1	1	1	1	1	1	1	1	1	1	1	1	1	1	1	1	1	1	1	1	1	1	1	1	1	1	1	1	1	1	1	1	1	1	1	1	1	1	1	1	1
Q9HUB9_yigP	1	1	1	1	1	1	1	1	1	1	1	1	1	1	1	1	1	1	1	1	1	1	1	1	1	1	1	1	1	1	1	1	1	1	1	1	1	1	1	1	1	1	1	1	1	1	1	1	1
Q9HVY8_sspB	1	1	1	1	1	1	1	1	1	1	1	1	1	1	1	1	1	1	1	1	1	1	1	1	1	1	1	1	1	1	1	1	1	1	1	1	1	1	1	1	1	1	1	1	1	1	1	1	1
Q9HX36_corC	1	1	1	1	1	1	1	1	1	1	1	1	1	1	1	1	1	1	1	1	1	1	1	1	1	1	1	1	1	1	1	1	1	1	1	1	1	1	1	1	1	1	1	1	1	1	1	1	1
Q9HUW0_fis	1	1	1	1	1	1	1	1	1	1	1	1	1	1	1	1	1	1	1	1	1	1	1	1	1	1	1	1	1	1	1	1	1	1	1	1	1	1	1	1	1	1	1	1	1	1	1	1	1
Q9HTK1_ubiC	1	1	1	1	1	1	1	1	1	1	1	1	1	1	1	1	1	1	1	1	1	1	1	1	1	1	1	1	1	1	1	1	1	1	1	1	1	1	1	1	1	1	1	1	1	1	1	1	1
Q9HU56_secB	1	1	1	1	1	1	1	1	1	1	1	1	1	1	1	1	1	1	1	1	1	1	1	1	1	1	1	1	1	1	1	1	1	1	1	1	1	1	1	1	1	1	1	1	1	1	1	1	1
Q9I5G9_sdhE	1	1	1	1	1	1	1	1	1	1	1	1	1	1	1	1	1	1	1	1	1	1	1	1	1	1	1	1	1	1	1	1	1	1	1	1	1	1	1	1	1	1	1	1	1	1	1	1	1
Q9I4W2_bamC	1	1	1	1	1	1	1	1	1	1	1	1	1	1	1	1	1	1	1	1	1	1	1	1	1	1	1	1	1	1	1	1	1	1	1	1	1	1	1	1	1	1	1	1	1	1	1	1	1
Q9HT82_scyA	1	1	1	1	1	1	1	1	1	1	1	1	1	1	1	1	1	1	1	1	1	1	1	1	1	1	1	1	1	1	1	1	1	1	1	1	1	1	1	1	1	1	1	1	1	1	1	1	1
Q9HTM7_	1	1	1	1	1	1	1	1	1	1	1	1	1	1	1	1	1	1	1	1	1	1	1	1	1	1	1	1	1	1	1	1	1	1	1	1	1	1	1	1	1	1	1	1	1	1	1	1	1
Q9HTQ4_cycB	1	1	1	1	1	1	1	1	1	1	1	1	1	1	1	1	1	1	1	1	1	1	1	1	1	1	1	1	1	1	1	1	1	1	1	1	1	1	1	1	1	1	1	1	1	1	1	1	1
Q9HT99_rtcB	1	1	1	1	1	1	1	1	1	1	1	1	1	1	1	1	1	1	1	1	1	1	1	1	1	1	1	1	1	1	1	1	1	1	1	1	1	1	1	1	1	1	1	1	1	1	1	1	1
Q9HVK1_rtcB	1	1	1	1	1	1	1	1	1	1	1	1	1	1	1	1	1	1	1	1	1	1	1	1	1	1	1	1	1	1	1	1	1	1	1	1	1	1	1	1	1	1	1	1	1	1	1	1	1
Q9HVK3_rtcR	1	1	1	1	1	1	1	1	1	1	1	1	1	1	1	1	1	1	1	1	1	1	1	1	1	1	1	1	1	1	1	1	1	1	1	1	1	1	1	1	1	1	1	1	1	1	1	1	1
Q9HYZ9_	1	1	1	1	1	1	1	1	1	1	1	1	1	1	1	1	1	1	1	1	1	1	1	1	1	1	1	1	1	1	1	1	1	1	1	1	1	1	1	1	1	1	1	1	1	1	1	1	1
Q9I0H8_	1	1	1	1	1	1	1	1	1	1	1	1	1	1	1	1	1	1	1	1	1	1	1	1	1	1	1	1	1	1	1	1	1	1	1	1	1	1	1	1	1	1	1	1	1	1	1	1	1
Q9I385_rssA	1	1	1	1	1	1	1	1	1	1	1	1	1	1	1	1	1	1	1	1	1	1	1	1	1	1	1	1	1	1	1	1	1	1	1	1	1	1	1	1	1	1	1	1	1	1	1	1	1
Q9I059_	1	1	1	1	1	1	1	1	1	1	1	1	1	1	1	1	1	1	1	1	1	1	1	1	1	1	1	1	1	1	1	1	1	1	1	1	1	1	1	1	1	1	1	1	1	1	1	1	1
Q9HYZ5_minE	1	1	1	1	1	1	1	1	1	1	1	1	1	1	1	1	1	1	1	1	1	1	1	1	1	1	1	1	1	1	1	1	1	1	1	1	1	1	1	1	1	1	1	1	1	1	1	1	1
Q9HYZ6_minD	1	1	1	1	1	1	1	1	1	1	1	1	1	1	1	1	1	1	1	1	1	1	1	1	1	1	1	1	1	1	1	1	1	1	1	1	1	1	1	1	1	1	1	1	1	1	1	1	1
Q9HYZ7_minC	1	1	1	1	1	1	1	1	1	1	1	1	1	1	1	1	1	1	1	1	1	1	1	1	1	1	1	1	1	1	1	1	1	1	1	1	1	1	1	1	1	1	1	1	1	1	1	1	1
Q9HZG8_	1	1	1	1	1	1	1	1	1	1	1	1	1	1	1	1	1	1	1	1	1	1	1	1	1	1	1	1	1	1	1	1	1	1	1	1	1	1	1	1	1	1	1	1	1	1	1	1	1
Q9I089_	1	1	1	1	1	1	1	1	1	1	1	1	1	1	1	1	1	1	1	1	1	1	1	1	1	1	1	1	1	1	1	1	1	1	1	1	1	1	1	1	1	1	1	1	1	1	1	1	1
Q9I421_	1	1	1	1	1	1	1	1	1	1	1	1	1	1	1	1	1	1	1	1	1	1	1	1	1	1	1	1	1	1	1	1	1	1	1	1	1	1	1	1	1	1	1	1	1	1	1	1	1
P25060_gspL	1	1	1	1	1	1	1	1	1	1	1	1	1	1	1	1	1	1	1	1	1	1	1	1	1	1	1	1	1	1	1	1	1	1	1	1	1	1	1	1	1	1	1	1	1	1	1	1	1
Q9I5P2_gspL	1	1	1	1	1	1	1	1	1	1	1	1	1	1	1	1	1	1	1	1	1	1	1	1	1	1	1	1	1	1	1	1	1	1	1	1	1	1	1	1	1	1	1	1	1	1	1	1	1
P25061_gspM	1	1	1	1	1	1	1	1	1	1	1	1	1	1	1	1	1	1	1	1	1	1	1	1	1	1	1	1	1	1	1	1	1	1	1	1	1	1	1	1	1	1	1	1	1	1	1	1	1
Q9I5P1_gspM	1	1	1	1	1	1	1	1	1	1	1	1	1	1	1	1	1	1	1	1	1	1	1	1	1	1	1	1	1	1	1	1	1	1	1	1	1	1	1	1	1	1	1	1	1	1	1	1	1
Q51575_gspC	1	1	1	1	1	1	1	1	1	1	1	1	1	1	1	1	1	1	1	1	1	1	1	1	1	1	1	1	1	1	1	1	1	1	1	1	1	1	1	1	1	1	1	1	1	1	1	1	1
Q9I2M8_xcsC	1	1	1	1	1	1	1	1	1	1	1	1	1	1	1	1	1	1	1	1	1	1	1	1	1	1	1	1	1	1	1	1	1	1	1	1	1	1	1	1	1	1	1	1	1	1	1	1	1
G3XCT5_pilK	1	1	1	1	1	1	1	1	1	1	1	1	1	1	1	1	1	1	1	1	1	1	1	1	1	1	1	1	1	1	1	1	1	1	1	1	1	1	1	1	1	1	1	1	1	1	1	1	1
Q9I6V7_cheR	1	1	1	1	1	1	1	1	1	1	1	1	1	1	1	1	1	1	1	1	1	1	1	1	1	1	1	1	1	1	1	1	1	1	1	1	1	1	1	1	1	1	1	1	1	1	1	1	1
O87131_cheR	1	1	1	1	1	1	1	1	1	1	1	1	1	1	1	1	1	1	1	1	1	1	1	1	1	1	1	1	1	1	1	1	1	1	1	1	1	1	1	1	1	1	1	1	1	1	1	1	1
Q9HXT5_wspC	1	1	1	1	1	1	1	1	1	1	1	1	1	1	1	1	1	1	1	1	1	1	1	1	1	1	1	1	1	1	1	1	1	1	1	1	1	1	1	1	1	1	1	1	1	1	1	1	1
G3XD73_motC	1	1	1	1	1	1	1	1	1	1	1	1	1	1	1	1	1	1	1	1	1	1	1	1	1	1	1	1	1	1	1	1	1	1	1	1	1	1	1	1	1	1	1	1	1	1	1	1	1
Q9HUL1_motA	1	1	1	1	1	1	1	1	1	1	1	1	1	1	1	1	1	1	1	1	1	1	1	1	1	1	1	1	1	1	1	1	1	1	1	1	1	1	1	1	1	1	1	1	1	1	1	1	1
G3XD90_motB	1	1	1	1	1	1	1	1	1	1	1	1	1	1	1	1	1	1	1	1	1	1	1	1	1	1	1	1	1	1	1	1	1	1	1	1	1	1	1	1	1	1	1	1	1	1	1	1	1
Q9HUL2_motB	1	1	1	1	1	1	1	1	1	1	1	1	1	1	1	1	1	1	1	1	1	1	1	1	1	1	1	1	1	1	1	1	1	1	1	1	1	1	1	1	1	1	1	1	1	1	1	1	1
P72151_flaB	1	1	1	1	1	1	1	1	1	1	1	1	1	1	1	1	1	1	1	1	1	1	1	1	1	1	1	1	1	1	1	1	1	1	1	1	1	1	1	1	1	1	1	1	1	1	1	1	1
Q9I4P2_flgL	1	1	1	1	1	1	1	1	1	1	1	1	1	1	1	1	1	1	1	1	1	1	1	1	1	1	1	1	1	1	1	1	1	1	1	1	1	1	1	1	1	1	1	1	1	1	1	1	1
Q9HTV7_fliL	1	1	1	1	1	1	1	1	1	1	1	1	1	1	1	1	1	1	1	1	1	1	1	1	1	1	1	1	1	1	1	1	1	1	1	1	1	1	1	1	1	1	1	1	1	1	1	1	1
Q9I3Q5_fliL	1	1	1	1	1	1	1	1	1	1	1	1	1	1	1	1	1	1	1	1	1	1	1	1	1	1	1	1	1	1	1	1	1	1	1	1	1	1	1	1	1	1	1	1	1	1	1	1	1
Q51464_fliG	1	1	1	1	1	1	1	1	1	1	1	1	1	1	1	1	1	1	1	1	1	1	1	1	1	1	1	1	1	1	1	1	1	1	1	1	1	1	1	1	1	1	1	1	1	1	1	1	1
Q9I4P4_flgJ	1	1	1	1	1	1	1	1	1	1	1	1	1	1	1	1	1	1	1	1	1	1	1	1	1	1	1	1	1	1	1	1	1	1	1	1	1	1	1	1	1	1	1	1	1	1	1	1	1
Q9I3N8_fliK1	1	1	1	1	1	1	1	1	1	1	1	1	1	1	1	1	1	1	1	1	1	1	1	1	1	1	1	1	1	1	1	1	1	1	1	1	1	1	1	1	1	1	1	1	1	1	1	1	1
Q9I3Q6_fliK	1	1	1	1	1	1	1	1	1	1	1	1	1	1	1	1	1	1	1	1	1	1	1	1	1	1	1	1	1	1	1	1	1	1	1	1	1	1	1	1	1	1	1	1	1	1	1	1	1
Q51467_fliO	1	1	1	1	1	1	1	1	1	1	1	1	1	1	1	1	1	1	1	1	1	1	1	1	1	1	1	1	1	1	1	1	1	1	1	1	1	1	1	1	1	1	1	1	1	1	1	1	1
Q9I4N0_fliJ	1	1	1	1	1	1	1	1	1	1	1	1	1	1	1	1	1	1	1	1	1	1	1	1	1	1	1	1	1	1	1	1	1	1	1	1	1	1	1	1	1	1	1	1	1	1	1	1	1
Q9I3P8_flhF	1	1	1	1	1	1	1	1	1	1	1	1	1	1	1	1	1	1	1	1	1	1	1	1	1	1	1	1	1	1	1	1	1	1	1	1	1	1	1	1	1	1	1	1	1	1	1	1	1
G3XD28_pilM	1	1	1	1	1	1	1	1	1	1	1	1	1	1	1	1	1	1	1	1	1	1	1	1	1	1	1	1	1	1	1	1	1	1	1	1	1	1	1	1	1	1	1	1	1	1	1	1	1
G3XD30_pilN	1	1	1	1	1	1	1	1	1	1	1	1	1	1	1	1	1	1	1	1	1	1	1	1	1	1	1	1	1	1	1	1	1	1	1	1	1	1	1	1	1	1	1	1	1	1	1	1	1
P22608_pilB	1	1	1	1	1	1	1	1	1	1	1	1	1	1	1	1	1	1	1	1	1	1	1	1	1	1	1	1	1	1	1	1	1	1	1	1	1	1	1	1	1	1	1	1	1	1	1	1	1
Q9I0G1_	1	1	1	1	1	1	1	1	1	1	1	1	1	1	1	1	1	1	1	1	1	1	1	1	1	1	1	1	1	1	1	1	1	1	1	1	1	1	1	1	1	1	1	1	1	1	1	1	1
Q9I5N9_gspE	1	1	1	1	1	1	1	1	1	1	1	1	1	1	1	1	1	1	1	1	1	1	1	1	1	1	1	1	1	1	1	1	1	1	1	1	1	1	1	1	1	1	1	1	1	1	1	1	1
Q00512_gspE	1	1	1	1	1	1	1	1	1	1	1	1	1	1	1	1	1	1	1	1	1	1	1	1	1	1	1	1	1	1	1	1	1	1	1	1	1	1	1	1	1	1	1	1	1	1	1	1	1
Q9HTY0_gspE	1	1	1	1	1	1	1	1	1	1	1	1	1	1	1	1	1	1	1	1	1	1	1	1	1	1	1	1	1	1	1	1	1	1	1	1	1	1	1	1	1	1	1	1	1	1	1	1	1
P22609_pilC	1	1	1	1	1	1	1	1	1	1	1	1	1	1	1	1	1	1	1	1	1	1	1	1	1	1	1	1	1	1	1	1	1	1	1	1	1	1	1	1	1	1	1	1	1	1	1	1	1
Q9I0G2_	1	1	1	1	1	1	1	1	1	1	1	1	1	1	1	1	1	1	1	1	1	1	1	1	1	1	1	1	1	1	1	1	1	1	1	1	1	1	1	1	1	1	1	1	1	1	1	1	1
Q9I5N8_gspF	1	1	1	1	1	1	1	1	1	1	1	1	1	1	1	1	1	1	1	1	1	1	1	1	1	1	1	1	1	1	1	1	1	1	1	1	1	1	1	1	1	1	1	1	1	1	1	1	1
Q00513_gspF	1	1	1	1	1	1	1	1	1	1	1	1	1	1	1	1	1	1	1	1	1	1	1	1	1	1	1	1	1	1	1	1	1	1	1	1	1	1	1	1	1	1	1	1	1	1	1	1	1
G3XD24_pctA	1	1	1	1	1	1	1	1	1	1	1	1	1	1	1	1	1	1	1	1	1	1	1	1	1	1	1	1	1	1	1	1	1	1	1	1	1	1	1	1	1	1	1	1	1	1	1	1	1
Q9I6V2_	1	1	1	1	1	1	1	1	1	1	1	1	1	1	1	1	1	1	1	1	1	1	1	1	1	1	1	1	1	1	1	1	1	1	1	1	1	1	1	1	1	1	1	1	1	1	1	1	1
Q9I6V6_aer2	1	1	1	1	1	1	1	1	1	1	1	1	1	1	1	1	1	1	1	1	1	1	1	1	1	1	1	1	1	1	1	1	1	1	1	1	1	1	1	1	1	1	1	1	1	1	1	1	1
G3XDA3_ctpH	1	1	1	1	1	1	1	1	1	1	1	1	1	1	1	1	1	1	1	1	1	1	1	1	1	1	1	1	1	1	1	1	1	1	1	1	1	1	1	1	1	1	1	1	1	1	1	1	1
P42257_pilJ	1	1	1	1	1	1	1	1	1	1	1	1	1	1	1	1	1	1	1	1	1	1	1	1	1	1	1	1	1	1	1	1	1	1	1	1	1	1	1	1	1	1	1	1	1	1	1	1	1
Q9HUB1_	1	1	1	1	1	1	1	1	1	1	1	1	1	1	1	1	1	1	1	1	1	1	1	1	1	1	1	1	1	1	1	1	1	1	1	1	1	1	1	1	1	1	1	1	1	1	1	1	1
Q9HUP8_	1	1	1	1	1	1	1	1	1	1	1	1	1	1	1	1	1	1	1	1	1	1	1	1	1	1	1	1	1	1	1	1	1	1	1	1	1	1	1	1	1	1	1	1	1	1	1	1	1
Q9HUW6_ctpL	1	1	1	1	1	1	1	1	1	1	1	1	1	1	1	1	1	1	1	1	1	1	1	1	1	1	1	1	1	1	1	1	1	1	1	1	1	1	1	1	1	1	1	1	1	1	1	1	1
Q9HVF8_	1	1	1	1	1	1	1	1	1	1	1	1	1	1	1	1	1	1	1	1	1	1	1	1	1	1	1	1	1	1	1	1	1	1	1	1	1	1	1	1	1	1	1	1	1	1	1	1	1
Q9HVQ2_	1	1	1	1	1	1	1	1	1	1	1	1	1	1	1	1	1	1	1	1	1	1	1	1	1	1	1	1	1	1	1	1	1	1	1	1	1	1	1	1	1	1	1	1	1	1	1	1	1
Q9HXT3_wspA	1	1	1	1	1	1	1	1	1	1	1	1	1	1	1	1	1	1	1	1	1	1	1	1	1	1	1	1	1	1	1	1	1	1	1	1	1	1	1	1	1	1	1	1	1	1	1	1	1
Q9HW91_pctA	1	1	1	1	1	1	1	1	1	1	1	1	1	1	1	1	1	1	1	1	1	1	1	1	1	1	1	1	1	1	1	1	1	1	1	1	1	1	1	1	1	1	1	1	1	1	1	1	1
Q9HZX9_	1	1	1	1	1	1	1	1	1	1	1	1	1	1	1	1	1	1	1	1	1	1	1	1	1	1	1	1	1	1	1	1	1	1	1	1	1	1	1	1	1	1	1	1	1	1	1	1	1
Q9HW93_pctC	1	1	1	1	1	1	1	1	1	1	1	1	1	1	1	1	1	1	1	1	1	1	1	1	1	1	1	1	1	1	1	1	1	1	1	1	1	1	1	1	1	1	1	1	1	1	1	1	1
Q9I0R3_	1	1	1	1	1	1	1	1	1	1	1	1	1	1	1	1	1	1	1	1	1	1	1	1	1	1	1	1	1	1	1	1	1	1	1	1	1	1	1	1	1	1	1	1	1	1	1	1	1
Q9HWB0_MA20_17940	1	1	1	1	1	1	1	1	1	1	1	1	1	1	1	1	1	1	1	1	1	1	1	1	1	1	1	1	1	1	1	1	1	1	1	1	1	1	1	1	1	1	1	1	1	1	1	1	1
Q9I0I4_	1	1	1	1	1	1	1	1	1	1	1	1	1	1	1	1	1	1	1	1	1	1	1	1	1	1	1	1	1	1	1	1	1	1	1	1	1	1	1	1	1	1	1	1	1	1	1	1	1
Q9HZS7_	1	1	1	1	1	1	1	1	1	1	1	1	1	1	1	1	1	1	1	1	1	1	1	1	1	1	1	1	1	1	1	1	1	1	1	1	1	1	1	1	1	1	1	1	1	1	1	1	1
Q9I379_	1	1	1	1	1	1	1	1	1	1	1	1	1	1	1	1	1	1	1	1	1	1	1	1	1	1	1	1	1	1	1	1	1	1	1	1	1	1	1	1	1	1	1	1	1	1	1	1	1
Q9I3B3_	1	1	1	1	1	1	1	1	1	1	1	1	1	1	1	1	1	1	1	1	1	1	1	1	1	1	1	1	1	1	1	1	1	1	1	1	1	1	1	1	1	1	1	1	1	1	1	1	1
Q9I3F6_aer-2	1	1	1	1	1	1	1	1	1	1	1	1	1	1	1	1	1	1	1	1	1	1	1	1	1	1	1	1	1	1	1	1	1	1	1	1	1	1	1	1	1	1	1	1	1	1	1	1	1
Q9I3S1_bdlA	1	1	1	1	1	1	1	1	1	1	1	1	1	1	1	1	1	1	1	1	1	1	1	1	1	1	1	1	1	1	1	1	1	1	1	1	1	1	1	1	1	1	1	1	1	1	1	1	1
Q9I493_	1	1	1	1	1	1	1	1	1	1	1	1	1	1	1	1	1	1	1	1	1	1	1	1	1	1	1	1	1	1	1	1	1	1	1	1	1	1	1	1	1	1	1	1	1	1	1	1	1
Q9I0I6_	1	1	1	1	1	1	1	1	1	1	1	1	1	1	1	1	1	1	1	1	1	1	1	1	1	1	1	1	1	1	1	1	1	1	1	1	1	1	1	1	1	1	1	1	1	1	1	1	1
[truncated: 93 more columns]

## Sheet: SD300
	G3XCZ0_fimT	Q9HVN0_fimT	G3XD84_pilV	Q9I0G5_	G3XCX7_pilP	G3XD15_	Q9HVM8_pilY1	G3XCX3_pilU	G3XD51_pilO	P04739_pilA	Q9I5G6_	Q9I5R2_	G3XCV8_	Q9I0H3_norR	Q9I362_nifA	G3XD43_pilE	O50274_cysN	Q9HWA2_	Q9I2C1_pqqD	P58040_yeiW	Q9I1U8_	Q9I2D5_	Q9HX50_	Q9HZB9_	Q9HWR9_	Q9HZG7_yqjE	Q9I5Z4_yqjC	Q9HW81_	Q9HXR2_	Q9HZL5_pilZ_1	P11221_oprI	Q9HT93_	Q9HX54_	Q9HZF7_VV12640	Q9HVF2_yajG	Q9HW86_mvaT	Q9I0H1_mvaT	Q9I628_	Q9HZJ0_	Q9I133_tyrR	Q9I572_tyrR	Q01725_lifO	Q9HUK7_	Q9HWC2_	Q9I014_	Q9HV99_	Q9HW76_	Q9I338_	Q9I4M0_mdoB
G3XCZ0_fimT	1	1	1	1	1	1	1	0	0	0	0	0	0	0	0	0	0	0	0	0	0	0	0	0	0	0	0	0	0	0	0	0	0	0	0	0	0	0	0	0	0	0	0	0	0	0	0	0	0
Q9HVN0_fimT	1	1	1	1	1	1	1	0	0	0	0	0	0	0	0	0	0	0	0	0	0	0	0	0	0	0	0	0	0	0	0	0	0	0	0	0	0	0	0	0	0	0	0	0	0	0	0	0	0
G3XD84_pilV	1	1	1	1	1	1	1	0	1	0	0	0	0	0	0	0	0	0	0	0	0	0	0	0	0	0	0	0	0	0	0	0	0	0	0	0	0	0	0	0	0	0	0	0	0	0	0	0	0
Q9I0G5_	1	1	1	1	1	1	1	0	1	0	0	0	0	0	0	0	0	0	0	0	0	0	0	0	0	0	0	0	0	0	0	0	0	0	0	0	0	0	0	0	0	0	0	0	0	0	0	0	0
G3XCX7_pilP	1	1	1	1	1	1	1	0	1	0	0	0	0	0	0	0	0	0	0	0	0	0	0	0	0	0	0	0	0	0	0	0	0	0	0	0	0	0	0	0	0	0	0	0	0	0	0	0	0
G3XD15_	1	1	1	1	1	1	1	0	0	0	0	0	0	0	0	0	0	0	0	0	0	0	0	0	0	0	0	0	0	0	0	0	0	0	0	0	0	0	0	0	0	0	0	0	0	0	0	0	0
Q9HVM8_pilY1	1	1	1	1	1	1	1	0	0	0	0	0	0	0	0	0	0	0	0	0	0	0	0	0	0	0	0	0	0	0	0	0	0	0	0	0	0	0	0	0	0	0	0	0	0	0	0	0	0
G3XCX3_pilU	0	0	0	0	0	0	0	1	0	0	0	0	0	0	0	0	0	0	0	0	0	0	0	0	0	0	0	0	0	0	0	0	0	0	0	0	0	0	0	0	0	0	0	0	0	0	0	0	0
G3XD51_pilO	0	0	1	1	1	0	0	0	1	0	0	0	0	0	0	0	0	0	0	0	0	0	0	0	0	0	0	0	0	0	0	0	0	0	0	0	0	0	0	0	0	0	0	0	0	0	0	0	0
P04739_pilA	0	0	0	0	0	0	0	0	0	1	1	1	0	0	0	0	0	0	0	0	0	0	0	0	0	0	0	0	0	0	0	0	0	0	0	0	0	0	0	0	0	0	0	0	0	0	0	0	0
Q9I5G6_	0	0	0	0	0	0	0	0	0	1	1	1	0	0	0	0	0	0	0	0	0	0	0	0	0	0	0	0	0	0	0	0	0	0	0	0	0	0	0	0	0	0	0	0	0	0	0	0	0
Q9I5R2_	0	0	0	0	0	0	0	0	0	1	1	1	0	0	0	0	0	0	0	0	0	0	0	0	0	0	0	0	0	0	0	0	0	0	0	0	0	0	0	0	0	0	0	0	0	0	0	0	0
G3XCV8_	0	0	0	0	0	0	0	0	0	0	0	0	1	0	0	0	0	0	0	0	0	0	0	0	0	0	0	0	0	0	0	0	0	0	0	0	0	0	0	0	0	0	0	0	0	0	0	0	0
Q9I0H3_norR	0	0	0	0	0	0	0	0	0	0	0	0	0	1	1	0	0	0	0	0	0	0	0	0	0	0	0	0	0	0	0	0	0	0	0	0	0	0	0	0	0	0	0	0	0	0	0	0	0
Q9I362_nifA	0	0	0	0	0	0	0	0	0	0	0	0	0	1	1	0	0	0	0	0	0	0	0	0	0	0	0	0	0	0	0	0	0	0	0	0	0	0	0	0	0	0	0	0	0	0	0	0	0
G3XD43_pilE	0	0	0	0	0	0	0	0	0	0	0	0	0	0	0	1	0	0	0	0	0	0	0	0	0	0	0	0	0	0	0	0	0	0	0	0	0	0	0	0	0	0	0	0	0	0	0	0	0
O50274_cysN	0	0	0	0	0	0	0	0	0	0	0	0	0	0	0	0	1	0	0	0	0	0	0	0	0	0	0	0	0	0	0	0	0	0	0	0	0	0	0	0	0	0	0	0	0	0	0	0	0
Q9HWA2_	0	0	0	0	0	0	0	0	0	0	0	0	0	0	0	0	0	1	0	0	0	0	0	0	0	0	0	0	0	0	0	0	0	0	0	0	0	0	0	0	0	0	0	0	0	0	0	0	0
Q9I2C1_pqqD	0	0	0	0	0	0	0	0	0	0	0	0	0	0	0	0	0	0	1	0	0	0	0	0	0	0	0	0	0	0	0	0	0	0	0	0	0	0	0	0	0	0	0	0	0	0	0	0	0
P58040_yeiW	0	0	0	0	0	0	0	0	0	0	0	0	0	0	0	0	0	0	0	1	0	0	0	0	0	0	0	0	0	0	0	0	0	0	0	0	0	0	0	0	0	0	0	0	0	0	0	0	0
Q9I1U8_	0	0	0	0	0	0	0	0	0	0	0	0	0	0	0	0	0	0	0	0	1	0	0	0	0	0	0	0	0	0	0	0	0	0	0	0	0	0	0	0	0	0	0	0	0	0	0	0	0
Q9I2D5_	0	0	0	0	0	0	0	0	0	0	0	0	0	0	0	0	0	0	0	0	0	1	0	0	0	0	0	0	0	0	0	0	0	0	0	0	0	0	0	0	0	0	0	0	0	0	0	0	0
Q9HX50_	0	0	0	0	0	0	0	0	0	0	0	0	0	0	0	0	0	0	0	0	0	0	1	0	0	0	0	0	0	0	0	0	0	0	0	0	0	0	0	0	0	0	0	0	0	0	0	0	0
Q9HZB9_	0	0	0	0	0	0	0	0	0	0	0	0	0	0	0	0	0	0	0	0	0	0	0	1	0	0	0	0	0	0	0	0	0	0	0	0	0	0	0	0	0	0	0	0	0	0	0	0	0
Q9HWR9_	0	0	0	0	0	0	0	0	0	0	0	0	0	0	0	0	0	0	0	0	0	0	0	0	1	0	0	0	0	0	0	0	0	0	0	0	0	0	0	0	0	0	0	0	0	0	0	0	0
Q9HZG7_yqjE	0	0	0	0	0	0	0	0	0	0	0	0	0	0	0	0	0	0	0	0	0	0	0	0	0	1	0	0	0	0	0	0	0	0	0	0	0	0	0	0	0	0	0	0	0	0	0	0	0
Q9I5Z4_yqjC	0	0	0	0	0	0	0	0	0	0	0	0	0	0	0	0	0	0	0	0	0	0	0	0	0	0	1	0	0	0	0	0	0	0	0	0	0	0	0	0	0	0	0	0	0	0	0	0	0
Q9HW81_	0	0	0	0	0	0	0	0	0	0	0	0	0	0	0	0	0	0	0	0	0	0	0	0	0	0	0	1	0	0	0	0	0	0	0	0	0	0	0	0	0	0	0	0	0	0	0	0	0
Q9HXR2_	0	0	0	0	0	0	0	0	0	0	0	0	0	0	0	0	0	0	0	0	0	0	0	0	0	0	0	0	1	0	0	0	0	0	0	0	0	0	0	0	0	0	0	0	0	0	0	0	0
Q9HZL5_pilZ_1	0	0	0	0	0	0	0	0	0	0	0	0	0	0	0	0	0	0	0	0	0	0	0	0	0	0	0	0	0	1	0	0	0	0	0	0	0	0	0	0	0	0	0	0	0	0	0	0	0
P11221_oprI	0	0	0	0	0	0	0	0	0	0	0	0	0	0	0	0	0	0	0	0	0	0	0	0	0	0	0	0	0	0	1	0	0	0	0	0	0	0	0	0	0	0	0	0	0	0	0	0	0
Q9HT93_	0	0	0	0	0	0	0	0	0	0	0	0	0	0	0	0	0	0	0	0	0	0	0	0	0	0	0	0	0	0	0	1	0	0	0	0	0	0	0	0	0	0	0	0	0	0	0	0	0
Q9HX54_	0	0	0	0	0	0	0	0	0	0	0	0	0	0	0	0	0	0	0	0	0	0	0	0	0	0	0	0	0	0	0	0	1	0	0	0	0	0	0	0	0	0	0	0	0	0	0	0	0
Q9HZF7_VV12640	0	0	0	0	0	0	0	0	0	0	0	0	0	0	0	0	0	0	0	0	0	0	0	0	0	0	0	0	0	0	0	0	0	1	0	0	0	0	0	0	0	0	0	0	0	0	0	0	0
Q9HVF2_yajG	0	0	0	0	0	0	0	0	0	0	0	0	0	0	0	0	0	0	0	0	0	0	0	0	0	0	0	0	0	0	0	0	0	0	1	0	0	0	0	0	0	0	0	0	0	0	0	0	0
Q9HW86_mvaT	0	0	0	0	0	0	0	0	0	0	0	0	0	0	0	0	0	0	0	0	0	0	0	0	0	0	0	0	0	0	0	0	0	0	0	1	1	1	0	0	0	0	0	0	0	0	0	0	0
Q9I0H1_mvaT	0	0	0	0	0	0	0	0	0	0	0	0	0	0	0	0	0	0	0	0	0	0	0	0	0	0	0	0	0	0	0	0	0	0	0	1	1	1	0	0	0	0	0	0	0	0	0	0	0
Q9I628_	0	0	0	0	0	0	0	0	0	0	0	0	0	0	0	0	0	0	0	0	0	0	0	0	0	0	0	0	0	0	0	0	0	0	0	1	1	1	0	0	0	0	0	0	0	0	0	0	0
Q9HZJ0_	0	0	0	0	0	0	0	0	0	0	0	0	0	0	0	0	0	0	0	0	0	0	0	0	0	0	0	0	0	0	0	0	0	0	0	0	0	0	1	1	1	0	0	0	0	0	0	0	0
Q9I133_tyrR	0	0	0	0	0	0	0	0	0	0	0	0	0	0	0	0	0	0	0	0	0	0	0	0	0	0	0	0	0	0	0	0	0	0	0	0	0	0	1	1	1	0	0	0	0	0	0	0	0
Q9I572_tyrR	0	0	0	0	0	0	0	0	0	0	0	0	0	0	0	0	0	0	0	0	0	0	0	0	0	0	0	0	0	0	0	0	0	0	0	0	0	0	1	1	1	0	0	0	0	0	0	0	0
Q01725_lifO	0	0	0	0	0	0	0	0	0	0	0	0	0	0	0	0	0	0	0	0	0	0	0	0	0	0	0	0	0	0	0	0	0	0	0	0	0	0	0	0	0	1	0	0	0	0	0	0	0
Q9HUK7_	0	0	0	0	0	0	0	0	0	0	0	0	0	0	0	0	0	0	0	0	0	0	0	0	0	0	0	0	0	0	0	0	0	0	0	0	0	0	0	0	0	0	1	0	0	0	0	0	0
Q9HWC2_	0	0	0	0	0	0	0	0	0	0	0	0	0	0	0	0	0	0	0	0	0	0	0	0	0	0	0	0	0	0	0	0	0	0	0	0	0	0	0	0	0	0	0	1	0	0	0	0	0
Q9I014_	0	0	0	0	0	0	0	0	0	0	0	0	0	0	0	0	0	0	0	0	0	0	0	0	0	0	0	0	0	0	0	0	0	0	0	0	0	0	0	0	0	0	0	0	1	1	1	0	0
Q9HV99_	0	0	0	0	0	0	0	0	0	0	0	0	0	0	0	0	0	0	0	0	0	0	0	0	0	0	0	0	0	0	0	0	0	0	0	0	0	0	0	0	0	0	0	0	1	1	1	0	0
Q9HW76_	0	0	0	0	0	0	0	0	0	0	0	0	0	0	0	0	0	0	0	0	0	0	0	0	0	0	0	0	0	0	0	0	0	0	0	0	0	0	0	0	0	0	0	0	1	1	1	0	0
Q9I338_	0	0	0	0	0	0	0	0	0	0	0	0	0	0	0	0	0	0	0	0	0	0	0	0	0	0	0	0	0	0	0	0	0	0	0	0	0	0	0	0	0	0	0	0	0	0	0	1	1
Q9I4M0_mdoB	0	0	0	0	0	0	0	0	0	0	0	0	0	0	0	0	0	0	0	0	0	0	0	0	0	0	0	0	0	0	0	0	0	0	0	0	0	0	0	0	0	0	0	0	0	0	0	1	1
Q9HZF4_	0	0	0	0	0	0	0	0	0	0	0	0	0	0	0	0	0	0	0	0	0	0	0	0	0	0	0	0	0	0	0	0	0	0	0	0	0	0	0	0	0	0	0	0	0	0	0	0	0
Q9I012_	0	0	0	0	0	0	0	0	0	0	0	0	0	0	0	0	0	0	0	0	0	0	0	0	0	0	0	0	0	0	0	0	0	0	0	0	0	0	0	0	0	0	0	0	0	0	0	0	0
Q9HXR1_liaH	0	0	0	0	0	0	0	0	0	0	0	0	0	0	0	0	0	0	0	0	0	0	0	0	0	0	0	0	0	0	0	0	0	0	0	0	0	0	0	0	0	0	0	0	0	0	0	0	0
Q9HXR4_	0	0	0	0	0	0	0	0	0	0	0	0	0	0	0	0	0	0	0	0	0	0	0	0	0	0	0	0	0	0	0	0	0	0	0	0	0	0	0	0	0	0	0	0	0	0	0	0	0
Q9HYZ8_lpxL	0	0	0	0	0	0	0	0	0	0	0	0	0	0	0	0	0	0	0	0	0	0	0	0	0	0	0	0	0	0	0	0	0	0	0	0	0	0	0	0	0	0	0	0	0	0	0	0	0
Q9I7B5_htrB	0	0	0	0	0	0	0	0	0	0	0	0	0	0	0	0	0	0	0	0	0	0	0	0	0	0	0	0	0	0	0	0	0	0	0	0	0	0	0	0	0	0	0	0	0	0	0	0	0
P21482_dsbB	0	0	0	0	0	0	0	0	0	0	0	0	0	0	0	0	0	0	0	0	0	0	0	0	0	0	0	0	0	0	0	0	0	0	0	0	0	0	0	0	0	0	0	0	0	0	0	0	0
P57701_dsbB	0	0	0	0	0	0	0	0	0	0	0	0	0	0	0	0	0	0	0	0	0	0	0	0	0	0	0	0	0	0	0	0	0	0	0	0	0	0	0	0	0	0	0	0	0	0	0	0	0
P42812_lolB	0	0	0	0	0	0	0	0	0	0	0	0	0	0	0	0	0	0	0	0	0	0	0	0	0	0	0	0	0	0	0	0	0	0	0	0	0	0	0	0	0	0	0	0	0	0	0	0	0
Q9HUB9_yigP	0	0	0	0	0	0	0	0	0	0	0	0	0	0	0	0	0	0	0	0	0	0	0	0	0	0	0	0	0	0	0	0	0	0	0	0	0	0	0	0	0	0	0	0	0	0	0	0	0
Q9HVY8_sspB	0	0	0	0	0	0	0	0	0	0	0	0	0	0	0	0	0	0	0	0	0	0	0	0	0	0	0	0	0	0	0	0	0	0	0	0	0	0	0	0	0	0	0	0	0	0	0	0	0
Q9HX36_corC	0	0	0	0	0	0	0	0	0	0	0	0	0	0	0	0	0	0	0	0	0	0	0	0	0	0	0	0	0	0	0	0	0	0	0	0	0	0	0	0	0	0	0	0	0	0	0	0	0
Q9HUW0_fis	0	0	0	0	0	0	0	0	0	0	0	0	0	0	0	0	0	0	0	0	0	0	0	0	0	0	0	0	0	0	0	0	0	0	0	0	0	0	0	0	0	0	0	0	0	0	0	0	0
Q9HTK1_ubiC	0	0	0	0	0	0	0	0	0	0	0	0	0	0	0	0	0	0	0	0	0	0	0	0	0	0	0	0	0	0	0	0	0	0	0	0	0	0	0	0	0	0	0	0	0	0	0	0	0
Q9HU56_secB	0	0	0	0	0	0	0	0	0	0	0	0	0	0	0	0	0	0	0	0	0	0	0	0	0	0	0	0	0	0	0	0	0	0	0	0	0	0	0	0	0	0	0	0	0	0	0	0	0
Q9I5G9_sdhE	0	0	0	0	0	0	0	0	0	0	0	0	0	0	0	0	0	0	0	0	0	0	0	0	0	0	0	0	0	0	0	0	0	0	0	0	0	0	0	0	0	0	0	0	0	0	0	0	0
Q9I4W2_bamC	0	0	0	0	0	0	0	0	0	0	0	0	0	0	0	0	0	0	0	0	0	0	0	0	0	0	0	0	0	0	0	0	0	0	0	0	0	0	0	0	0	0	0	0	0	0	0	0	0
Q9HT82_scyA	0	0	0	0	0	0	0	0	0	0	0	0	0	0	0	0	0	0	0	0	0	0	0	0	0	0	0	0	0	0	0	0	0	0	0	0	0	0	0	0	0	0	0	0	0	0	0	0	0
Q9HTM7_	0	0	0	0	0	0	0	0	0	0	0	0	0	0	0	0	0	0	0	0	0	0	0	0	0	0	0	0	0	0	0	0	0	0	0	0	0	0	0	0	0	0	0	0	0	0	0	0	0
Q9HTQ4_cycB	0	0	0	0	0	0	0	0	0	0	0	0	0	0	0	0	0	0	0	0	0	0	0	0	0	0	0	0	0	0	0	0	0	0	0	0	0	0	0	0	0	0	0	0	0	0	0	0	0
Q9HT99_rtcB	0	0	0	0	0	0	0	0	0	0	0	0	0	0	0	0	0	0	0	0	0	0	0	0	0	0	0	0	0	0	0	0	0	0	0	0	0	0	0	0	0	0	0	0	0	0	0	0	0
Q9HVK1_rtcB	0	0	0	0	0	0	0	0	0	0	0	0	0	0	0	0	0	0	0	0	0	0	0	0	0	0	0	0	0	0	0	0	0	0	0	0	0	0	0	0	0	0	0	0	0	0	0	0	0
Q9HVK3_rtcR	0	0	0	0	0	0	0	0	0	0	0	0	0	0	0	0	0	0	0	0	0	0	0	0	0	0	0	0	0	0	0	0	0	0	0	0	0	0	0	0	0	0	0	0	0	0	0	0	0
Q9HYZ9_	0	0	0	0	0	0	0	0	0	0	0	0	0	0	0	0	0	0	0	0	0	0	0	0	0	0	0	0	0	0	0	0	0	0	0	0	0	0	0	0	0	0	0	0	0	0	0	0	0
Q9I0H8_	0	0	0	0	0	0	0	0	0	0	0	0	0	0	0	0	0	0	0	0	0	0	0	0	0	0	0	0	0	0	0	0	0	0	0	0	0	0	0	0	0	0	0	0	0	0	0	0	0
Q9I385_rssA	0	0	0	0	0	0	0	0	0	0	0	0	0	0	0	0	0	0	0	0	0	0	0	0	0	0	0	0	0	0	0	0	0	0	0	0	0	0	0	0	0	0	0	0	0	0	0	0	0
Q9I059_	0	0	0	0	0	0	0	0	0	0	0	0	0	0	0	0	0	0	0	0	0	0	0	0	0	0	0	0	0	0	0	0	0	0	0	0	0	0	0	0	0	0	0	0	0	0	0	0	0
Q9HYZ5_minE	0	0	0	0	0	0	0	0	0	0	0	0	0	0	0	0	0	0	0	0	0	0	0	0	0	0	0	0	0	0	0	0	0	0	0	0	0	0	0	0	0	0	0	0	0	0	0	0	0
Q9HYZ6_minD	0	0	0	0	0	0	0	0	0	0	0	0	0	0	0	0	0	0	0	0	0	0	0	0	0	0	0	0	0	0	0	0	0	0	0	0	0	0	0	0	0	0	0	0	0	0	0	0	0
Q9HYZ7_minC	0	0	0	0	0	0	0	0	0	0	0	0	0	0	0	0	0	0	0	0	0	0	0	0	0	0	0	0	0	0	0	0	0	0	0	0	0	0	0	0	0	0	0	0	0	0	0	0	0
Q9HZG8_	0	0	0	0	0	0	0	0	0	0	0	0	0	0	0	0	0	0	0	0	0	0	0	0	0	0	0	0	0	0	0	0	0	0	0	0	0	0	0	0	0	0	0	0	0	0	0	0	0
Q9I089_	0	0	0	0	0	0	0	0	0	0	0	0	0	0	0	0	0	0	0	0	0	0	0	0	0	0	0	0	0	0	0	0	0	0	0	0	0	0	0	0	0	0	0	0	0	0	0	0	0
Q9I421_	0	0	0	0	0	0	0	0	0	0	0	0	0	0	0	0	0	0	0	0	0	0	0	0	0	0	0	0	0	0	0	0	0	0	0	0	0	0	0	0	0	0	0	0	0	0	0	0	0
P25060_gspL	0	0	0	0	0	0	0	0	0	0	0	0	0	0	0	0	0	0	0	0	0	0	0	0	0	0	0	0	0	0	0	0	0	0	0	0	0	0	0	0	0	0	0	0	0	0	0	0	0
Q9I5P2_gspL	0	0	0	0	0	0	0	0	0	0	0	0	0	0	0	0	0	0	0	0	0	0	0	0	0	0	0	0	0	0	0	0	0	0	0	0	0	0	0	0	0	0	0	0	0	0	0	0	0
P25061_gspM	0	0	0	0	0	0	0	0	0	0	0	0	0	0	0	0	0	0	0	0	0	0	0	0	0	0	0	0	0	0	0	0	0	0	0	0	0	0	0	0	0	0	0	0	0	0	0	0	0
Q9I5P1_gspM	0	0	0	0	0	0	0	0	0	0	0	0	0	0	0	0	0	0	0	0	0	0	0	0	0	0	0	0	0	0	0	0	0	0	0	0	0	0	0	0	0	0	0	0	0	0	0	0	0
Q51575_gspC	0	0	0	0	0	0	0	0	0	0	0	0	0	0	0	0	0	0	0	0	0	0	0	0	0	0	0	0	0	0	0	0	0	0	0	0	0	0	0	0	0	0	0	0	0	0	0	0	0
Q9I2M8_xcsC	0	0	0	0	0	0	0	0	0	0	0	0	0	0	0	0	0	0	0	0	0	0	0	0	0	0	0	0	0	0	0	0	0	0	0	0	0	0	0	0	0	0	0	0	0	0	0	0	0
G3XCT5_pilK	0	0	0	0	0	0	0	0	0	0	0	0	0	0	0	0	0	0	0	0	0	0	0	0	0	0	0	0	0	0	0	0	0	0	0	0	0	0	0	0	0	0	0	0	0	0	0	0	0
Q9I6V7_cheR	0	0	0	0	0	0	0	0	0	0	0	0	0	0	0	0	0	0	0	0	0	0	0	0	0	0	0	0	0	0	0	0	0	0	0	0	0	0	0	0	0	0	0	0	0	0	0	0	0
O87131_cheR	0	0	0	0	0	0	0	0	0	0	0	0	0	0	0	0	0	0	0	0	0	0	0	0	0	0	0	0	0	0	0	0	0	0	0	0	0	0	0	0	0	0	0	0	0	0	0	0	0
Q9HXT5_wspC	0	0	0	0	0	0	0	0	0	0	0	0	0	0	0	0	0	0	0	0	0	0	0	0	0	0	0	0	0	0	0	0	0	0	0	0	0	0	0	0	0	0	0	0	0	0	0	0	0
G3XD73_motC	0	0	0	0	0	0	0	0	0	0	0	0	0	0	0	0	0	0	0	0	0	0	0	0	0	0	0	0	0	0	0	0	0	0	0	0	0	0	0	0	0	0	0	0	0	0	0	0	0
Q9HUL1_motA	0	0	0	0	0	0	0	0	0	0	0	0	0	0	0	0	0	0	0	0	0	0	0	0	0	0	0	0	0	0	0	0	0	0	0	0	0	0	0	0	0	0	0	0	0	0	0	0	0
G3XD90_motB	0	0	0	0	0	0	0	0	0	0	0	0	0	0	0	0	0	0	0	0	0	0	0	0	0	0	0	0	0	0	0	0	0	0	0	0	0	0	0	0	0	0	0	0	0	0	0	0	0
Q9HUL2_motB	0	0	0	0	0	0	0	0	0	0	0	0	0	0	0	0	0	0	0	0	0	0	0	0	0	0	0	0	0	0	0	0	0	0	0	0	0	0	0	0	0	0	0	0	0	0	0	0	0
P72151_flaB	0	0	0	0	0	0	0	0	0	0	0	0	0	0	0	0	0	0	0	0	0	0	0	0	0	0	0	0	0	0	0	0	0	0	0	0	0	0	0	0	0	0	0	0	0	0	0	0	0
Q9I4P2_flgL	0	0	0	0	0	0	0	0	0	0	0	0	0	0	0	0	0	0	0	0	0	0	0	0	0	0	0	0	0	0	0	0	0	0	0	0	0	0	0	0	0	0	0	0	0	0	0	0	0
Q9HTV7_fliL	0	0	0	0	0	0	0	0	0	0	0	0	0	0	0	0	0	0	0	0	0	0	0	0	0	0	0	0	0	0	0	0	0	0	0	0	0	0	0	0	0	0	0	0	0	0	0	0	0
Q9I3Q5_fliL	0	0	0	0	0	0	0	0	0	0	0	0	0	0	0	0	0	0	0	0	0	0	0	0	0	0	0	0	0	0	0	0	0	0	0	0	0	0	0	0	0	0	0	0	0	0	0	0	0
Q51464_fliG	0	0	0	0	0	0	0	0	0	0	0	0	0	0	0	0	0	0	0	0	0	0	0	0	0	0	0	0	0	0	0	0	0	0	0	0	0	0	0	0	0	0	0	0	0	0	0	0	0
Q9I4P4_flgJ	0	0	0	0	0	0	0	0	0	0	0	0	0	0	0	0	0	0	0	0	0	0	0	0	0	0	0	0	0	0	0	0	0	0	0	0	0	0	0	0	0	0	0	0	0	0	0	0	0
Q9I3N8_fliK1	0	0	0	0	0	0	0	0	0	0	0	0	0	0	0	0	0	0	0	0	0	0	0	0	0	0	0	0	0	0	0	0	0	0	0	0	0	0	0	0	0	0	0	0	0	0	0	0	0
Q9I3Q6_fliK	0	0	0	0	0	0	0	0	0	0	0	0	0	0	0	0	0	0	0	0	0	0	0	0	0	0	0	0	0	0	0	0	0	0	0	0	0	0	0	0	0	0	0	0	0	0	0	0	0
Q51467_fliO	0	0	0	0	0	0	0	0	0	0	0	0	0	0	0	0	0	0	0	0	0	0	0	0	0	0	0	0	0	0	0	0	0	0	0	0	0	0	0	0	0	0	0	0	0	0	0	0	0
Q9I4N0_fliJ	0	0	0	0	0	0	0	0	0	0	0	0	0	0	0	0	0	0	0	0	0	0	0	0	0	0	0	0	0	0	0	0	0	0	0	0	0	0	0	0	0	0	0	0	0	0	0	0	0
Q9I3P8_flhF	0	0	0	0	0	0	0	0	0	0	0	0	0	0	0	0	0	0	0	0	0	0	0	0	0	0	0	0	0	0	0	0	0	0	0	0	0	0	0	0	0	0	0	0	0	0	0	0	0
G3XD28_pilM	0	0	1	1	0	0	0	0	1	1	1	0	0	0	0	0	0	0	0	0	0	0	0	0	0	0	0	0	0	0	0	0	0	0	0	0	0	0	0	0	0	0	0	0	0	0	0	0	0
G3XD30_pilN	1	1	1	1	1	0	0	0	1	0	0	0	0	0	0	0	0	0	0	0	0	0	0	0	0	0	0	0	0	0	0	0	0	0	0	0	0	0	0	0	0	0	0	0	0	0	0	0	0
P22608_pilB	0	0	0	0	0	0	0	0	0	0	0	0	0	0	0	0	0	0	0	0	0	0	0	0	0	0	0	0	0	0	0	0	0	0	0	0	0	0	0	0	0	0	0	0	0	0	0	0	0
Q9I0G1_	0	0	0	0	0	0	0	0	0	0	0	0	0	0	0	0	0	0	0	0	0	0	0	0	0	0	0	0	0	0	0	0	0	0	0	0	0	0	0	0	0	0	0	0	0	0	0	0	0
Q9I5N9_gspE	0	0	0	0	0	0	0	0	0	0	0	0	0	0	0	0	0	0	0	0	0	0	0	0	0	0	0	0	0	0	0	0	0	0	0	0	0	0	0	0	0	0	0	0	0	0	0	0	0
Q00512_gspE	0	0	0	0	0	0	0	0	0	0	0	0	0	0	0	0	0	0	0	0	0	0	0	0	0	0	0	0	0	0	0	0	0	0	0	0	0	0	0	0	0	0	0	0	0	0	0	0	0
Q9HTY0_gspE	0	0	0	0	0	0	0	0	0	0	0	0	0	0	0	0	0	0	0	0	0	0	0	0	0	0	0	0	0	0	0	0	0	0	0	0	0	0	0	0	0	0	0	0	0	0	0	0	0
P22609_pilC	0	0	0	0	0	0	0	0	0	1	1	0	0	0	0	0	0	0	0	0	0	0	0	0	0	0	0	0	0	0	0	0	0	0	0	0	0	0	0	0	0	0	0	0	0	0	0	0	0
Q9I0G2_	0	0	0	0	0	0	0	0	0	1	1	0	0	0	0	0	0	0	0	0	0	0	0	0	0	0	0	0	0	0	0	0	0	0	0	0	0	0	0	0	0	0	0	0	0	0	0	0	0
Q9I5N8_gspF	0	0	0	0	0	0	0	0	0	1	1	0	0	0	0	0	0	0	0	0	0	0	0	0	0	0	0	0	0	0	0	0	0	0	0	0	0	0	0	0	0	0	0	0	0	0	0	0	0
Q00513_gspF	0	0	0	0	0	0	0	0	0	1	1	0	0	0	0	0	0	0	0	0	0	0	0	0	0	0	0	0	0	0	0	0	0	0	0	0	0	0	0	0	0	0	0	0	0	0	0	0	0
G3XD24_pctA	0	0	0	0	0	0	0	0	0	0	0	0	0	0	0	0	0	0	0	0	0	0	0	0	0	0	0	0	0	0	0	0	0	0	0	0	0	0	0	0	0	0	0	0	0	0	0	0	0
Q9I6V2_	0	0	0	0	0	0	0	0	0	0	0	0	0	0	0	0	0	0	0	0	0	0	0	0	0	0	0	0	0	0	0	0	0	0	0	0	0	0	0	0	0	0	0	0	0	0	0	0	0
Q9I6V6_aer2	0	0	0	0	0	0	0	0	0	0	0	0	0	0	0	0	0	0	0	0	0	0	0	0	0	0	0	0	0	0	0	0	0	0	0	0	0	0	0	0	0	0	0	0	0	0	0	0	0
G3XDA3_ctpH	0	0	0	0	0	0	0	0	0	0	0	0	0	0	0	0	0	0	0	0	0	0	0	0	0	0	0	0	0	0	0	0	0	0	0	0	0	0	0	0	0	0	0	0	0	0	0	0	0
P42257_pilJ	0	0	0	0	0	0	0	0	0	0	0	0	0	0	0	0	0	0	0	0	0	0	0	0	0	0	0	0	0	0	0	0	0	0	0	0	0	0	0	0	0	0	0	0	0	0	0	0	0
Q9HUB1_	0	0	0	0	0	0	0	0	0	0	0	0	0	0	0	0	0	0	0	0	0	0	0	0	0	0	0	0	0	0	0	0	0	0	0	0	0	0	0	0	0	0	0	0	0	0	0	0	0
Q9HUP8_	0	0	0	0	0	0	0	0	0	0	0	0	0	0	0	0	0	0	0	0	0	0	0	0	0	0	0	0	0	0	0	0	0	0	0	0	0	0	0	0	0	0	0	0	0	0	0	0	0
Q9HUW6_ctpL	0	0	0	0	0	0	0	0	0	0	0	0	0	0	0	0	0	0	0	0	0	0	0	0	0	0	0	0	0	0	0	0	0	0	0	0	0	0	0	0	0	0	0	0	0	0	0	0	0
Q9HVF8_	0	0	0	0	0	0	0	0	0	0	0	0	0	0	0	0	0	0	0	0	0	0	0	0	0	0	0	0	0	0	0	0	0	0	0	0	0	0	0	0	0	0	0	0	0	0	0	0	0
Q9HVQ2_	0	0	0	0	0	0	0	0	0	0	0	0	0	0	0	0	0	0	0	0	0	0	0	0	0	0	0	0	0	0	0	0	0	0	0	0	0	0	0	0	0	0	0	0	0	0	0	0	0
Q9HXT3_wspA	0	0	0	0	0	0	0	0	0	0	0	0	0	0	0	0	0	0	0	0	0	0	0	0	0	0	0	0	0	0	0	0	0	0	0	0	0	0	0	0	0	0	0	0	0	0	0	0	0
Q9HW91_pctA	0	0	0	0	0	0	0	0	0	0	0	0	0	0	0	0	0	0	0	0	0	0	0	0	0	0	0	0	0	0	0	0	0	0	0	0	0	0	0	0	0	0	0	0	0	0	0	0	0
Q9HZX9_	0	0	0	0	0	0	0	0	0	0	0	0	0	0	0	0	0	0	0	0	0	0	0	0	0	0	0	0	0	0	0	0	0	0	0	0	0	0	0	0	0	0	0	0	0	0	0	0	0
Q9HW93_pctC	0	0	0	0	0	0	0	0	0	0	0	0	0	0	0	0	0	0	0	0	0	0	0	0	0	0	0	0	0	0	0	0	0	0	0	0	0	0	0	0	0	0	0	0	0	0	0	0	0
Q9I0R3_	0	0	0	0	0	0	0	0	0	0	0	0	0	0	0	0	0	0	0	0	0	0	0	0	0	0	0	0	0	0	0	0	0	0	0	0	0	0	0	0	0	0	0	0	0	0	0	0	0
Q9HWB0_MA20_17940	0	0	0	0	0	0	0	0	0	0	0	0	0	0	0	0	0	0	0	0	0	0	0	0	0	0	0	0	0	0	0	0	0	0	0	0	0	0	0	0	0	0	0	0	0	0	0	0	0
Q9I0I4_	0	0	0	0	0	0	0	0	0	0	0	0	0	0	0	0	0	0	0	0	0	0	0	0	0	0	0	0	0	0	0	0	0	0	0	0	0	0	0	0	0	0	0	0	0	0	0	0	0
Q9HZS7_	0	0	0	0	0	0	0	0	0	0	0	0	0	0	0	0	0	0	0	0	0	0	0	0	0	0	0	0	0	0	0	0	0	0	0	0	0	0	0	0	0	0	0	0	0	0	0	0	0
Q9I379_	0	0	0	0	0	0	0	0	0	0	0	0	0	0	0	0	0	0	0	0	0	0	0	0	0	0	0	0	0	0	0	0	0	0	0	0	0	0	0	0	0	0	0	0	0	0	0	0	0
Q9I3B3_	0	0	0	0	0	0	0	0	0	0	0	0	0	0	0	0	0	0	0	0	0	0	0	0	0	0	0	0	0	0	0	0	0	0	0	0	0	0	0	0	0	0	0	0	0	0	0	0	0
Q9I3F6_aer-2	0	0	0	0	0	0	0	0	0	0	0	0	0	0	0	0	0	0	0	0	0	0	0	0	0	0	0	0	0	0	0	0	0	0	0	0	0	0	0	0	0	0	0	0	0	0	0	0	0
Q9I3S1_bdlA	0	0	0	0	0	0	0	0	0	0	0	0	0	0	0	0	0	0	0	0	0	0	0	0	0	0	0	0	0	0	0	0	0	0	0	0	0	0	0	0	0	0	0	0	0	0	0	0	0
Q9I493_	0	0	0	0	0	0	0	0	0	0	0	0	0	0	0	0	0	0	0	0	0	0	0	0	0	0	0	0	0	0	0	0	0	0	0	0	0	0	0	0	0	0	0	0	0	0	0	0	0
Q9I0I6_	0	0	0	0	0	0	0	0	0	0	0	0	0	0	0	0	0	0	0	0	0	0	0	0	0	0	0	0	0	0	0	0	0	0	0	0	0	0	0	0	0	0	0	0	0	0	0	0	0
[truncated: 93 more columns]

## Sheet: DAVID Analysis SD50
SD50
Category	Term	Count	%	PValue	Genes	List Total	Pop Hits	Pop Total	Fold Enrichment	Bonferroni	Benjamini	FDR
INTERPRO	IPR004089:Methyl-accepting chemotaxis protein (MCP) signalling domain	24	17.0213	9.44734e-35	Q9HUP8, Q9I0I6, Q9HZS7, G3XD24, Q9HZX9, Q9I0I4, Q9I6V6, Q9I379, Q9HUW6, Q9HVQ2, Q9HXT3, Q9HW93, Q9I6V2, Q9I3S1, Q9I0R3, Q9I493, P42257, Q9HW91, Q9HVF8, G3XDA3, Q9HWB0, Q9HUB1, Q9I3B3, Q9I3F6	129	26	4955	35.4562	1.37931e-32	1.37931e-32	1.2376e-32
SMART	SM00283:MA	24	17.0213	6.33921e-34	Q9HUP8, Q9I0I6, Q9HZS7, G3XD24, Q9HZX9, Q9I0I4, Q9I6V6, Q9I379, Q9HUW6, Q9HVQ2, Q9HXT3, Q9HW93, Q9I6V2, Q9I3S1, Q9I0R3, Q9I493, P42257, Q9HW91, Q9HVF8, G3XDA3, Q9HWB0, Q9HUB1, Q9I3B3, Q9I3F6	40	26	1071	24.7154	8.8749e-33	8.8749e-33	7.60706e-33
KEGG_PATHWAY	pae02030:Bacterial chemotaxis	26	18.4397	2.02922e-28	Q9HUP8, Q9HUL2, Q9HUL1, Q9I6V6, Q9I379, Q9I6V7, G3XD73, Q9HW93, Q9I6V2, Q9I0R3, G3XD90, Q9HW91, G3XDA3, Q51464, Q9I0I6, Q9HZS7, G3XD24, Q9I0I4, Q9HVQ2, Q9I3S1, Q9HVF8, Q9HWB0, Q9HUB1, O87131, Q9I3B3, Q9I3F6	56	45	1705	17.5913	3.24676e-27	3.24676e-27	3.24676e-27
GOTERM_MF_DIRECT	GO:0004871~signal transducer activity	23	16.3121	3.26623e-28	Q9HUP8, Q9I0I6, Q9HZS7, G3XD24, Q9HZX9, Q9I0I4, Q9I6V6, Q9I379, Q9HUW6, Q9HVQ2, Q9HXT3, Q9HW93, Q9I6V2, Q9I0R3, Q9I493, P42257, Q9HW91, Q9HVF8, G3XDA3, Q9HWB0, Q9HUB1, Q9I3B3, Q9I3F6	81	38	3597	26.8782	1.27383e-26	1.27383e-26	1.24117e-26
INTERPRO	IPR004090:Chemotaxis methyl-accepting receptor	15	10.6383	3.28847e-21	Q9HUP8, Q9I0I6, Q9HZS7, G3XD24, Q9I6V6, Q9HUW6, Q9HXT3, Q9I6V2, Q9I3S1, Q9I493, P42257, G3XDA3, Q9HUB1, Q9I3B3, Q9I3F6	129	16	4955	36.0102	4.80117e-19	2.40058e-19	2.15395e-19
INTERPRO	IPR003660:HAMP linker domain	20	14.1844	1.03762e-18	Q9HUP8, Q9I0I6, Q9HZS7, G3XD24, Q9HZX9, Q9I0I4, Q9I6V6, Q9I379, Q9HUW6, Q9HVQ2, Q9HXT3, Q9HW93, Q9I0R3, Q9I493, P42257, Q9HW91, Q9HVF8, G3XDA3, Q9HUB1, Q9I3B3	129	48	4955	16.0045	1.51493e-16	5.04977e-17	4.53096e-17
GOTERM_BP_DIRECT	GO:0006935~chemotaxis	18	12.766	5.49433e-17	Q9HUP8, Q9HZS7, G3XD24, Q9HTV7, Q9I4N0, Q9HXT3, Q9I3Q5, Q9HW93, Q9I6V2, Q9I3S1, Q9I493, P42257, Q9HW91, Q51467, G3XDA3, Q9HUB1, Q9I3B3, Q51464	83	41	2950	15.6039	3.40648e-15	3.40648e-15	3.18671e-15
COG_ONTOLOGY	Cell motility and secretion / Signal transduction mechanisms	13	9.21986	3.04132e-16	Q9HUP8, Q9I0I6, Q9HZS7, Q9HXT5, Q9HZX9, Q9I0I4, Q9I379, Q9HUW6, Q9HVQ2, Q9HXT3, Q9I6V7, Q9I6V2, O87131	39	17	1308	25.6471	3.9968e-15	3.34545e-15	3.34545e-15
SMART	SM00304:HAMP	17	12.0567	1.11813e-14	Q9HUP8, Q9I0I6, Q9HZS7, G3XD24, Q9HZX9, Q9I0I4, Q9I379, Q9HVQ2, Q9HXT3, Q9HW93, Q9I0R3, Q9I493, Q9HW91, Q9HVF8, G3XDA3, Q9HUB1, Q9I3B3	40	40	1071	11.3794	1.56986e-13	7.8269e-14	6.70878e-14
KEGG_PATHWAY	pae02020:Two-component system	29	20.5674	3.10156e-14	Q9HUP8, Q9HXT5, G3XCT5, Q9HUL1, Q9I6V6, Q9I379, P04739, Q9HXT3, Q9I6V7, G3XD73, Q9HW93, Q9I6V2, Q9I0R3, Q9HW91, G3XDA3, P72151, Q9I0I6, Q9HZS7, G3XD24, Q9I0I4, Q9HVQ2, Q9I3S1, P42257, Q9HVF8, Q9HWB0, Q9HUB1, O87131, Q9I3B3, Q9I3F6	56	183	1705	4.82484	4.95604e-13	2.48124e-13	2.48124e-13
GOTERM_BP_DIRECT	GO:0071973~bacterial-type flagellum-dependent cell motility	11	7.80142	2.32919e-11	P72151, G3XD90, Q9HUL2, Q9HUL1, Q9HTV7, Q9I4P2, Q9I4N0, Q9I4P4, Q9I3Q5, G3XD73, Q51464	83	20	2950	19.5482	1.4441e-09	4.81367e-10	4.50311e-10
GOTERM_BP_DIRECT	GO:0043107~type IV pilus-dependent motility	11	7.80142	2.32919e-11	G3XD28, G3XCZ0, G3XD15, P22608, G3XD43, G3XCX7, P04739, G3XD30, G3XD51, G3XD84, G3XCX3	83	20	2950	19.5482	1.4441e-09	4.81367e-10	4.50311e-10
COG_ONTOLOGY	Cell motility and secretion / Intracellular trafficking and secretion	12	8.51064	2.49981e-11	G3XCZ0, G3XD15, P22609, Q9I0G1, Q9HVN0, Q9HTY0, Q9I0G2, G3XD43, Q9I5R2, P04739, Q9HVM8, G3XCX3	39	27	1308	14.906	2.99976e-10	1.37489e-10	1.37489e-10
GOTERM_BP_DIRECT	GO:0043683~type IV pilus biogenesis	9	6.38298	3.89986e-11	G3XD28, G3XCZ0, G3XD15, Q9HVN0, G3XD43, G3XCX7, G3XD30, G3XD51, G3XD84	83	11	2950	29.08	2.41791e-09	6.04478e-10	5.65479e-10
UP_KEYWORDS	Transducer	8	5.67376	4.70912e-11	Q9I0I6, P42257, Q9HW91, G3XD24, G3XDA3, Q9HUW6, Q9HW93, Q9I3S1	141	8	5494	38.9645	3.34348e-09	3.34348e-09	2.73129e-09
GOTERM_BP_DIRECT	GO:0015628~protein secretion by the type II secretion system	11	7.80142	3.68155e-10	Q9I5N9, G3XCZ0, Q9I5N8, P22609, Q00513, P25061, Q9HVN0, Q00512, Q9I0G2, P25060, Q51575	83	25	2950	15.6386	2.28256e-08	4.56512e-09	4.2706e-09
GOTERM_MF_DIRECT	GO:0008565~protein transporter activity	11	7.80142	1.42318e-09	Q9I5N9, G3XCZ0, P42812, Q9I5N8, Q00513, Q9HVN0, P22608, Q00512, Q9HUL1, P25060, G3XD73	81	34	3597	14.3671	5.5504e-08	2.7752e-08	2.70404e-08
UP_KEYWORDS	Protein transport	12	8.51064	9.60386e-09	Q9I5N9, P42812, P22609, Q00513, P25061, P22608, Q00512, Q9I3P8, P25060, Q9HU56, G3XD73, Q51575	141	45	5494	10.3905	6.81874e-07	3.40937e-07	2.78512e-07
UP_KEYWORDS	Membrane	62	43.9716	6.56104e-08	Q9HZX9, Q9I3P8, Q9I379, G3XD30, Q9HXT3, Q9I338, Q9HYZ8, G3XD73, Q9HW93, Q9I6V2, Q9I0R3, Q9I059, Q9I493, Q9HW91, Q51467, G3XCZ0, Q00513, Q9HZG7, Q01725, Q51464, Q9I0I6, Q9HZS7, P25061, Q9I0I4, G3XD43, P25060, Q9I4M0, G3XD84, Q9HW81, P42257, P42812, Q9HVF8, Q51575, Q9I3B3, Q9I3F6, Q9HUP8, Q9I5N8, G3XD15, Q9HXR2, Q9HUL2, Q9HUL1, Q9I5R2, Q9HX54, G3XD51, P11221, Q9HX50, P57701, G3XD90, Q9HT93, G3XDA3,…	141	1281	5494	1.88587	4.65833e-06	1.24629e-06	1.0181e-06
UP_KEYWORDS	Transmembrane helix	57	40.4255	7.02137e-08	Q9HZX9, Q9I379, G3XD30, Q9HXT3, Q9I338, Q9HYZ8, G3XD73, Q9HW93, Q9I6V2, Q9I0R3, Q9I059, Q9I493, Q9HW91, Q51467, G3XCZ0, Q00513, Q9HZG7, Q01725, Q9I0I6, Q9HZS7, P25061, Q9I0I4, G3XD43, P25060, Q9I4M0, G3XD84, Q9HW81, P42257, Q9HVF8, Q51575, Q9I3B3, Q9I3F6, Q9HUP8, Q9I5N8, G3XD15, Q9HXR2, Q9HUL2, Q9HUL1, Q9I5R2, Q9HX54, G3XD51, Q9HX50, P57701, G3XD90, Q9HT93, G3XDA3, Q9I0G5, P21482, G3XD24, Q9I628,…	141	1125	5494	1.9742	4.98516e-06	1.24629e-06	1.0181e-06
UP_KEYWORDS	Methylation	8	5.67376	9.44088e-08	Q9I0I6, P42257, Q9HW91, G3XD24, G3XDA3, P04739, Q9HUW6, Q9HW93	141	17	5494	18.3363	6.70301e-06	1.34061e-06	1.09514e-06
GOTERM_CC_DIRECT	GO:0016021~integral component of membrane	58	41.1348	1.10531e-07	Q9HZX9, Q9I6V6, Q9I379, G3XD30, Q9HXT3, Q9I338, G3XD73, Q9HW93, Q9I6V2, Q9I0R3, Q9I059, Q9I493, Q9HW91, Q51467, G3XCZ0, Q00513, Q9HZG7, Q01725, Q9I0I6, Q9HZS7, P25061, Q9I0I4, G3XD43, P25060, Q9I4M0, G3XD84, Q9HW81, P42257, Q9I7B5, Q9HVF8, Q51575, Q9I3B3, Q9I3F6, Q9HUP8, Q9I5N8, G3XD15, Q9HXR2, Q9HUL2, Q9HUL1, Q9I5R2, Q9HX54, G3XD51, Q9HX50, P57701, G3XD90, Q9HT93, G3XDA3, Q9I0G5, P21482, G3XD24,…	84	1067	2644	1.71098	2.43169e-06	2.43169e-06	2.1001e-06
UP_KEYWORDS	Transmembrane	57	40.4255	2.17307e-07	Q9HZX9, Q9I379, G3XD30, Q9HXT3, Q9I338, Q9HYZ8, G3XD73, Q9HW93, Q9I6V2, Q9I0R3, Q9I059, Q9I493, Q9HW91, Q51467, G3XCZ0, Q00513, Q9HZG7, Q01725, Q9I0I6, Q9HZS7, P25061, Q9I0I4, G3XD43, P25060, Q9I4M0, G3XD84, Q9HW81, P42257, Q9HVF8, Q51575, Q9I3B3, Q9I3F6, Q9HUP8, Q9I5N8, G3XD15, Q9HXR2, Q9HUL2, Q9HUL1, Q9I5R2, Q9HX54, G3XD51, Q9HX50, P57701, G3XD90, Q9HT93, G3XDA3, Q9I0G5, P21482, G3XD24, Q9I628,…	141	1161	5494	1.91299	1.54287e-05	2.37707e-06	1.94183e-06
UP_KEYWORDS	Chemotaxis	8	5.67376	2.34359e-07	Q9I0I6, Q9HW91, Q51467, G3XD24, G3XDA3, Q9HUW6, Q9HW93, Q51464	141	19	5494	16.4061	1.66394e-05	2.37707e-06	1.94183e-06
KEGG_PATHWAY	pae03070:Bacterial secretion system	15	10.6383	4.67442e-07	Q9I0G5, Q9I2M8, Q9I5N9, Q9I5N8, Q9I0G1, P25061, Q9I0G2, Q9I5P1, P25060, Q9HU56, Q9I5P2, Q00513, Q00512, Q9HTY0, Q51575	56	92	1705	4.96409	7.47904e-06	2.49302e-06	2.49302e-06
INTERPRO	IPR001482:Type II secretion system protein E	6	4.25532	5.6016e-07	Q9I5N9, Q9I0G1, P22608, Q00512, Q9HTY0, G3XCX3	129	8	4955	28.8081	8.17801e-05	2.04458e-05	1.83452e-05
KEGG_PATHWAY	pae02040:Flagellar assembly	10	7.0922	7.17151e-07	P72151, G3XD90, Q51467, Q9HUL2, Q9HUL1, Q9I4P2, Q9I4N0, Q9I3Q6, G3XD73, Q51464	56	35	1705	8.69898	1.14744e-05	2.8686e-06	2.8686e-06
INTERPRO	IPR024478:4HB MCP domain	5	3.5461	2.08365e-06	Q9HUP8, Q9I493, Q9HZS7, Q9HXT3, Q9I3B3	129	5	4955	38.4109	0.000304168	6.08427e-05	5.45917e-05
INTERPRO	IPR012902:Prokaryotic N-terminal methylation site	7	4.96454	3.80383e-06	Q9I0G5, G3XCZ0, G3XD15, Q9HVN0, G3XD43, P04739, G3XD84	129	18	4955	14.9376	0.000555206	9.25598e-05	8.30502e-05
INTERPRO	IPR022641:MCP methyltransferase, CheR-type, all-alpha domain, N-terminal	4	2.83688	6.61113e-05	Q9HXT5, G3XCT5, Q9I6V7, O87131	129	4	4955	38.4109	0.00960613	0.000965224	0.000866058
INTERPRO	IPR000780:MCP methyltransferase, CheR-type	4	2.83688	6.61113e-05	Q9HXT5, G3XCT5, Q9I6V7, O87131	129	4	4955	38.4109	0.00960613	0.000965224	0.000866058
INTERPRO	IPR003004:GspF/PilC family	4	2.83688	6.61113e-05	Q9I5N8, P22609, Q00513, Q9I0G2	129	4	4955	38.4109	0.00960613	0.000965224	0.000866058
INTERPRO	IPR022642:MCP methyltransferase, CheR-type, SAM-binding domain, C-terminal	4	2.83688	6.61113e-05	Q9HXT5, G3XCT5, Q9I6V7, O87131	129	4	4955	38.4109	0.00960613	0.000965224	0.000866058
GOTERM_CC_DIRECT	GO:0015627~type II protein secretion system complex	6	4.25532	0.000124254	Q9I5N9, G3XCZ0, Q9I5N8, Q00513, Q9HVN0, Q00512	84	17	2644	11.1092	0.00273002	0.00136679	0.00118041
UP_KEYWORDS	Cell inner membrane	17	12.0567	0.000137193	Q9I0I6, P21482, P25061, G3XD24, Q9HUW6, Q9HYZ8, P25060, Q9HW93, P57701, P42257, Q9HW91, P22609, Q00513, G3XDA3, Q51575, Q01725, Q51464	141	221	5494	2.99727	0.00969411	0.00121759	0.000994652
INTERPRO	IPR000727:Target SNARE coiled-coil domain	4	2.83688	0.000162153	Q9I0I6, G3XD24, Q9HW93, Q9I3F6	129	5	4955	30.7287	0.0233981	0.00215221	0.00193109
SMART	SM00138:MeTrc	4	2.83688	0.000174517	Q9HXT5, G3XCT5, Q9I6V7, O87131	40	4	1071	26.775	0.00244047	0.000814414	0.000698069
INTERPRO	IPR018076:Type II secretion system F domain	4	2.83688	0.00031818	Q9I5N8, P22609, Q00513, Q9I0G2	129	6	4955	25.6072	0.0453988	0.00387118	0.00347346
GOTERM_MF_DIRECT	GO:0008983~protein-glutamate O-methyltransferase activity	3	2.12766	0.00144461	G3XCT5, Q9I6V7, O87131	81	3	3597	44.4074	0.0548206	0.0187799	0.0182984
INTERPRO	IPR002323:Cytochrome c, class IE	3	2.12766	0.00195302	Q9HTM7, Q9HT82, Q9HTQ4	129	3	4955	38.4109	0.248301	0.0190094	0.0170564
INTERPRO	IPR007831:General secretory system II, protein E, N-terminal	3	2.12766	0.00195302	Q9I0G1, P22608, Q9HTY0	129	3	4955	38.4109	0.248301	0.0190094	0.0170564
INTERPRO	IPR010279:Protein of unknown function DUF883, ElaB	3	2.12766	0.00195302	Q9HZG8, Q9I089, Q9I421	129	3	4955	38.4109	0.248301	0.0190094	0.0170564
INTERPRO	IPR002078:RNA polymerase sigma factor 54 interaction domain	5	3.5461	0.00216571	Q9I572, Q9HVK3, Q9I362, Q9I0H3, Q9I133	129	22	4955	8.72974	0.271332	0.0197621	0.0177318
GOTERM_CC_DIRECT	GO:0009425~bacterial-type flagellum basal body	4	2.83688	0.00305262	Q51467, Q9HTV7, Q9I3Q5, Q51464	84	10	2644	12.5905	0.0650482	0.0223859	0.0193332
UP_KEYWORDS	Cell membrane	19	13.4752	0.0037791	Q9I0I6, P21482, P25061, G3XD24, Q9I3P8, Q9HUW6, Q9HYZ8, P25060, Q9HW93, P57701, P42257, Q9HW91, Q51467, P22609, Q00513, G3XDA3, Q51575, Q01725, Q51464	141	356	5494	2.07957	0.235722	0.0298129	0.0243542
UP_KEYWORDS	Coiled coil	11	7.80142	0.00447572	Q9I5Z4, Q9I0H1, Q9HUL2, Q9HXR4, Q9I6V6, Q9I4N0, Q9HW86, Q9I379, Q9HXR1, G3XD30, G3XD51	141	149	5494	2.87658	0.272753	0.0317776	0.0259592
UP_KEYWORDS	Bacterial flagellum	4	2.83688	0.00847457	P72151, Q51467, Q9I4P2, Q51464	141	17	5494	9.16813	0.453521	0.0506245	0.0413552
INTERPRO	IPR016035:Acyl transferase/acyl hydrolase/lysophospholipase	3	2.12766	0.00927858	Q9I385, Q9I0H8, Q9HYZ9	129	6	4955	19.2054	0.743595	0.0796866	0.0714996
UP_KEYWORDS	Cell projection	4	2.83688	0.0099823	G3XD90, Q9I4P2, Q9I4N0, G3XD73	141	18	5494	8.65879	0.509488	0.0506245	0.0413552
UP_KEYWORDS	Cilium	4	2.83688	0.0099823	G3XD90, Q9I4P2, Q9I4N0, G3XD73	141	18	5494	8.65879	0.509488	0.0506245	0.0413552
UP_KEYWORDS	Flagellum	4	2.83688	0.0099823	G3XD90, Q9I4P2, Q9I4N0, G3XD73	141	18	5494	8.65879	0.509488	0.0506245	0.0413552
UP_KEYWORDS	Chaperone	5	3.5461	0.0114595	P42812, P21482, Q9HU56, Q01725, P57701	141	35	5494	5.56636	0.558829	0.0542417	0.0443101
INTERPRO	IPR027417:P-loop containing nucleoside triphosphate hydrolase	15	10.6383	0.0118723	Q9I5N9, Q9HVK3, Q9I0G1, Q9I3P8, Q9I0H3, Q9HXR4, Q9HYZ6, Q9I133, G3XCX3, Q9I572, Q9I362, P22608, O50274, Q00512, Q9HTY0	129	278	4955	2.07253	0.825132	0.0962973	0.0864037
INTERPRO	IPR025662:Sigma-54 interaction domain, ATP-binding site 1	4	2.83688	0.0139196	Q9I572, Q9I362, Q9I0H3, Q9I133	129	20	4955	7.68217	0.870819	0.106961	0.0959722
GOTERM_BP_DIRECT	GO:0044781~bacterial-type flagellum organization	3	2.12766	0.01464	P72151, Q51467, Q9I3P8	83	7	2950	15.2324	0.599239	0.15128	0.14152
GOTERM_CC_DIRECT	GO:0005886~plasma membrane	22	15.6028	0.0161423	Q9I0I6, Q9I5N8, P21482, P25061, G3XD24, Q9I3P8, Q9HUL1, Q9I0G2, Q9HUW6, P25060, G3XD73, Q9HW93, P57701, P42257, Q9HW91, Q51467, P22609, Q00513, G3XDA3, Q51575, Q01725, Q51464	84	419	2644	1.65269	0.300946	0.0761891	0.0657997
UP_KEYWORDS	Fimbrium biogenesis	3	2.12766	0.0163232	P22609, P22608, Q9HVM8	141	8	5494	14.6117	0.68917	0.0724341	0.0591715
GOTERM_CC_DIRECT	GO:0031514~motile cilium	4	2.83688	0.0173157	G3XD90, Q9I4P2, Q9I4N0, G3XD73	84	18	2644	6.99471	0.319061	0.0761891	0.0657997
UP_SEQ_FEATURE	transmembrane region	9	6.38298	0.0209432	P42257, Q51467, P21482, Q00513, P25061, P25060, Q51575, Q01725, P57701	29	158	1220	2.39633	0.681121	0.366062	0.366062
GOTERM_BP_DIRECT	GO:0071978~bacterial-type flagellum-dependent swarming motility	4	2.83688	0.0217789	G3XD90, Q9HUL2, Q9HUL1, G3XD73	83	22	2950	6.46221	0.744674	0.190289	0.178012
GOTERM_BP_DIRECT	GO:0006457~protein folding	4	2.83688	0.0245534	P21482, Q9HU56, Q01725, P57701	83	23	2950	6.18125	0.7859	0.190289	0.178012
INTERPRO	IPR000014:PAS domain	5	3.5461	0.025997	Q9I572, Q9I6V6, Q9I133, Q9I3S1, Q9I3F6	129	44	4955	4.36487	0.97863	0.189778	0.170281
UP_SEQ_FEATURE	topological domain:Periplasmic	4	2.83688	0.0372725	P42257, P21482, Q51575, P57701	29	33	1220	5.09927	0.871418	0.366062	0.366062
INTERPRO	IPR003593:AAA+ ATPase domain	9	6.38298	0.0380195	Q9I572, Q9I5N9, Q9HVK3, Q9I362, Q9I0G1, Q9HTY0, Q9I3P8, Q9I0H3, Q9I133	129	149	4955	2.32012	0.996514	0.206844	0.185593
PIR_SUPERFAMILY	PIRSF000410:chemotaxis protein methyltransferase 3	2	1.41844	0.0421838	Q9I6V7, O87131	17	2	751	44.1765	0.476119	0.316378	0.316378
PIR_SUPERFAMILY	PIRSF026649:lipid A biosynthesis lauroyl acyltransferase	2	1.41844	0.0421838	Q9I7B5, Q9HYZ8	17	2	751	44.1765	0.476119	0.316378	0.316378
GOTERM_MF_DIRECT	GO:0004181~metallocarboxypeptidase activity	2	1.41844	0.0439929	Q9HZF4, Q9I012	81	2	3597	44.4074	0.827025	0.343145	0.334346
GOTERM_MF_DIRECT	GO:0008452~RNA ligase activity	2	1.41844	0.0439929	Q9HVK1, Q9HT99	81	2	3597	44.4074	0.827025	0.343145	0.334346
UP_SEQ_FEATURE	chain:Disulfide bond formation protein B 1	2	1.41844	0.0453933	P21482, P57701	29	2	1220	42.069	0.918619	0.366062	0.366062
UP_SEQ_FEATURE	chain:Disulfide bond formation protein B 2	2	1.41844	0.0453933	P21482, P57701	29	2	1220	42.069	0.918619	0.366062	0.366062
UP_SEQ_FEATURE	domain:CheR-type methyltransferase	2	1.41844	0.0453933	Q9I6V7, O87131	29	2	1220	42.069	0.918619	0.366062	0.366062
UP_SEQ_FEATURE	domain:Methyl-accepting transducer	2	1.41844	0.0453933	P42257, Q9I3S1	29	2	1220	42.069	0.918619	0.366062	0.366062
UP_SEQ_FEATURE	topological domain:Cytoplasmic	4	2.83688	0.0465897	P42257, P21482, Q51575, P57701	29	36	1220	4.67433	0.923948	0.366062	0.366062
UP_KEYWORDS	Fimbrium	2	1.41844	0.0503199	P04739, Q9HVM8	141	2	5494	38.9645	0.974415	0.210159	0.17168
INTERPRO	IPR026024:Chemotaxis protein methyltransferase CheR	2	1.41844	0.0510027	Q9I6V7, O87131	129	2	4955	38.4109	0.999521	0.206844	0.185593
INTERPRO	IPR003752:Disulphide bond formation protein DsbB/BdbC	2	1.41844	0.0510027	P21482, P57701	129	2	4955	38.4109	0.999521	0.206844	0.185593
INTERPRO	IPR001992:Type II secretion system conserved site	2	1.41844	0.0510027	P22609, Q00513	129	2	4955	38.4109	0.999521	0.206844	0.185593
INTERPRO	IPR013369:Type II secretion system GspE	2	1.41844	0.0510027	Q9I5N9, Q00512	129	2	4955	38.4109	0.999521	0.206844	0.185593
INTERPRO	IPR023380:Disulphide bond formation protein DsbB-like domain	2	1.41844	0.0510027	P21482, P57701	129	2	4955	38.4109	0.999521	0.206844	0.185593
INTERPRO	IPR001029:Flagellin, D0/D1 domain	2	1.41844	0.0510027	P72151, Q9I4P2	129	2	4955	38.4109	0.999521	0.206844	0.185593
INTERPRO	IPR022920:Disulphide bond formation protein DsbB	2	1.41844	0.0510027	P21482, P57701	129	2	4955	38.4109	0.999521	0.206844	0.185593
INTERPRO	IPR025713:Motility protein B, N-terminal domain	2	1.41844	0.0510027	G3XD90, Q9HUL2	129	2	4955	38.4109	0.999521	0.206844	0.185593
INTERPRO	IPR000834:Peptidase M14, carboxypeptidase A	2	1.41844	0.0510027	Q9HZF4, Q9I012	129	2	4955	38.4109	0.999521	0.206844	0.185593
INTERPRO	IPR011850:General secretion pathway protein F	2	1.41844	0.0510027	Q9I5N8, Q00513	129	2	4955	38.4109	0.999521	0.206844	0.185593
INTERPRO	IPR025691:GspL periplasmic domain	2	1.41844	0.0510027	P25060, Q9I5P2	129	2	4955	38.4109	0.999521	0.206844	0.185593
INTERPRO	IPR005503:Flagellar basal body-associated protein FliL	2	1.41844	0.0510027	Q9HTV7, Q9I3Q5	129	2	4955	38.4109	0.999521	0.206844	0.185593
INTERPRO	IPR001233:RtcB family	2	1.41844	0.0510027	Q9HVK1, Q9HT99	129	2	4955	38.4109	0.999521	0.206844	0.185593
INTERPRO	IPR004960:Bacterial lipid A biosynthesis acyltransferase	2	1.41844	0.0510027	Q9I7B5, Q9HYZ8	129	2	4955	38.4109	0.999521	0.206844	0.185593
INTERPRO	IPR022522:Flagellar motor stator, MotA	2	1.41844	0.0510027	Q9HUL1, G3XD73	129	2	4955	38.4109	0.999521	0.206844	0.185593
GOTERM_BP_DIRECT	GO:0052131~positive aerotaxis	2	1.41844	0.0548297	Q9I6V6, Q9I3F6	83	2	2950	35.5422	0.969687	0.30904	0.289102
GOTERM_BP_DIRECT	GO:0009454~aerotaxis	2	1.41844	0.0548297	Q9I6V6, Q9I3F6	83	2	2950	35.5422	0.969687	0.30904	0.289102
GOTERM_BP_DIRECT	GO:0010963~regulation of L-arginine import	2	1.41844	0.0548297	Q9I0H1, Q9HW86	83	2	2950	35.5422	0.969687	0.30904	0.289102
INTERPRO	IPR002197:DNA binding HTH domain, Fis-type	3	2.12766	0.0699411	Q9HUW0, Q9I362, Q9I0H3	129	17	4955	6.77839	0.999975	0.275586	0.247273
SMART	SM01358:SM01358	2	1.41844	0.0715359	Q9I379, Q9HUB1	40	2	1071	26.775	0.646238	0.250376	0.214608
INTERPRO	IPR021136:Flagellar hook-length control protein-like, C-terminal	2	1.41844	0.0755276	Q9I3N8, Q9I3Q6	129	3	4955	25.6072	0.99999	0.275586	0.247273
INTERPRO	IPR007690:Type II secretion system, protein M	2	1.41844	0.0755276	P25061, Q9I5P1	129	3	4955	25.6072	0.99999	0.275586	0.247273
INTERPRO	IPR002641:Patatin/Phospholipase A2-related	2	1.41844	0.0755276	Q9I385, Q9HYZ9	129	3	4955	25.6072	0.99999	0.275586	0.247273
INTERPRO	IPR025944:Sigma-54 interaction domain, conserved site	3	2.12766	0.0773907	Q9I572, Q9I0H3, Q9I133	129	18	4955	6.40181	0.999992	0.275586	0.247273
GOTERM_BP_DIRECT	GO:0050918~positive chemotaxis	2	1.41844	0.0811201	Q9I0I6, Q9HUW6	83	3	2950	23.6948	0.994727	0.38688	0.36192
GOTERM_BP_DIRECT	GO:0006858~extracellular transport	2	1.41844	0.0811201	P25061, Q9I5P1	83	3	2950	23.6948	0.994727	0.38688	0.36192
GOTERM_CC_DIRECT	GO:0044096~type IV pilus	2	1.41844	0.0912835	G3XD43, P04739	84	3	2644	20.9841	0.878262	0.334706	0.289064
INTERPRO	IPR025943:Sigma-54 interaction domain, ATP-binding site 2	3	2.12766	0.0929835	Q9HVK3, Q9I362, Q9I0H3	129	20	4955	5.76163	0.999999	0.323228	0.29002
INTERPRO	IPR022346:General secretion pathway, GspH	2	1.41844	0.0994235	G3XCZ0, Q9HVN0	129	4	4955	19.2054	1	0.337577	0.302895

## Sheet: DAVID Analysis SD300
Unknown
Q9I014
Q9HV99
Q9HW76
Unknown
Q9HZG8
Q9I089
Q9I421
L-arginine transport
Q9HW86	mvaT
Q9I0H1	mvaT
Q9I628	Unannotated
Category	Term	Count	%	PValue	Genes	List Total	Pop Hits	Pop Total	Fold Enrichment	Bonferroni	Benjamini	FDR
GOTERM_BP_DIRECT	GO:0010963~regulation of L-arginine import	2	66.6667	0.000677966	Q9I0H1, Q9HW86	2	2	2950	1475	0.00338524	0.00271186	0.00271186
GOTERM_BP_DIRECT	GO:1900377~negative regulation of secondary metabolite biosynthetic process	2	66.6667	0.0040678	Q9I0H1, Q9HW86	2	12	2950	245.833	0.0201742	0.00813559	0.00813559
GOTERM_MF_DIRECT	GO:0044212~transcription regulatory region DNA binding	2	66.6667	0.0111204	Q9I0H1, Q9HW86	2	40	3597	89.925	0.0111204	0.0111204	0.0111204
UP_KEYWORDS	Coiled coil	2	66.6667	0.0535103	Q9I0H1, Q9HW86	3	149	5494	24.5817	0.152094	0.214041	0.214041
Bacterial Secretion System
P25060	gspL
Q9I5P2	gspL
P25061	gspM
Q9I5P1	gspM
Q51575	gspC
Q9I2M8	xcsC
Category	Term	Count	%	PValue	Genes	List Total	Pop Hits	Pop Total	Fold Enrichment	Bonferroni	Benjamini	FDR
KEGG_PATHWAY	pae03070:Bacterial secretion system	6	100	4.11976e-07	Q9I2M8, P25061, Q9I5P1, P25060, Q9I5P2, Q51575	6	92	1705	18.5326	4.11976e-07	4.11976e-07	4.11976e-07
GOTERM_BP_DIRECT	GO:0015628~protein secretion by the type II secretion system	3	50	0.000205831	P25061, P25060, Q51575	4	25	2950	88.5	0.000617366	0.000411662	0.000411662
UP_KEYWORDS	Protein transport	3	50	0.00064588	P25061, P25060, Q51575	6	45	5494	61.0444	0.00515538	0.00516704	0.00387528
INTERPRO	IPR025691:GspL periplasmic domain	2	33.3333	0.00121065	P25060, Q9I5P2	4	2	4955	1238.75	0.00603863	0.00453903	0.00453903
INTERPRO	IPR007690:Type II secretion system, protein M	2	33.3333	0.00181561	P25061, Q9I5P1	4	3	4955	825.833	0.00904516	0.00453903	0.00453903
GOTERM_BP_DIRECT	GO:0006858~extracellular transport	2	33.3333	0.00304878	P25061, Q9I5P1	4	3	2950	491.667	0.00911848	0.00304878	0.00304878
UP_KEYWORDS	Cell inner membrane	3	50	0.0148638	P25061, P25060, Q51575	6	221	5494	12.4299	0.112905	0.0594551	0.0445913
UP_SEQ_FEATURE	transmembrane region	3	50	0.0166799	P25061, P25060, Q51575	3	158	1220	7.72152	0.0806633	0.100079	0.100079
GOTERM_CC_DIRECT	GO:0005576~extracellular region	2	33.3333	0.0314466	P25061, Q9I5P1	4	28	2644	47.2143	0.119976	0.125786	0.125786
UP_KEYWORDS	Transport	3	50	0.0363498	P25061, P25060, Q51575	6	354	5494	7.75989	0.256373	0.0734693	0.055102
UP_KEYWORDS	Cell membrane	3	50	0.0367347	P25061, P25060, Q51575	6	356	5494	7.71629	0.258745	0.0734693	0.055102
GOTERM_CC_DIRECT	GO:0005886~plasma membrane	3	50	0.0672772	P25061, P25060, Q51575	4	419	2644	4.7327	0.243149	0.134554	0.134554
Methyl-accepting chemotaxis protein
G3XD24	pctA
Q9I6V2	Unannotated
Q9I6V6	aer2
G3XDA3	ctpH
P42257	pilJ
Q9HUB1	Unannotated
Q9HUP8	Unannotated
Q9HUW6	ctpL
Q9HVF8	Unannotated
Q9HVQ2	Unannotated
Q9HXT3	wspA
Q9HW91	pctA
Q9HZX9	Unannotated
Q9HW93	pctC
Q9I0R3	Unannotated
Q9HWB0	17940
Q9I0I4	Unannotated
Q9HZS7	Unannotated
Q9I379	Unannotated
Q9I3B3	Unannotated
Q9I3F6	aer-2
Q9I3S1	bdlA
Q9I493	Unannotated
Q9I0I6	Unannotated
Cytochrome c
P42812	lolB
Q9HUB9	yigP
Q9HVY8	sspB
Q9HX36	corC
Q9HT82	scyA
Q9HTM7	Uannotated
Q9HTQ4	cycB
Category	Term	Count	%	PValue	Genes	List Total	Pop Hits	Pop Total	Fold Enrichment	Bonferroni	Benjamini	FDR
INTERPRO	IPR002323:Cytochrome c, class IE	3	42.8571	3.66445e-06	Q9HTM7, Q9HT82, Q9HTQ4	7	3	4955	707.857	3.29796e-05	3.29801e-05	3.29801e-05
INTERPRO	IPR009056:Cytochrome c domain	3	42.8571	0.000634594	Q9HTM7, Q9HT82, Q9HTQ4	7	33	4955	64.3506	0.00569687	0.00285567	0.00285567
GOTERM_MF_DIRECT	GO:0020037~heme binding	3	42.8571	0.00182757	Q9HTM7, Q9HT82, Q9HTQ4	5	64	3597	33.7219	0.0109154	0.00833205	0.00833205
GOTERM_MF_DIRECT	GO:0005506~iron ion binding	3	42.8571	0.00277735	Q9HTM7, Q9HT82, Q9HTQ4	5	79	3597	27.319	0.0165488	0.00833205	0.00833205
GOTERM_MF_DIRECT	GO:0009055~electron carrier activity	3	42.8571	0.00708309	Q9HTM7, Q9HT82, Q9HTQ4	5	127	3597	16.9937	0.041753	0.0141662	0.0141662
Bacterial flagellum
G3XD73	motC
Q9HUL1	motA
G3XD90	motB
Q9HUL2	motB
P72151	flaB
Q9I4P2	flgL
Q9HTV7	fliL
Q9I3Q5	fliL
Q51464	fliG
Q9I4P4	flgJ
Q9I3N8	fliK1
Q9I3Q6	fliK
Q51467	fliO
Q9I4N0	fliJ
Q9I3P8	flhF
Category	Term	Count	%	PValue	Genes	List Total	Pop Hits	Pop Total	Fold Enrichment	Bonferroni	Benjamini	FDR
GOTERM_BP_DIRECT	GO:0071973~bacterial-type flagellum-dependent cell motility	11	73.3333	8.94041e-22	P72151, G3XD90, Q9HUL2, Q9HUL1, Q9HTV7, Q9I4P2, Q9I4N0, Q9I4P4, Q9I3Q5, G3XD73, Q51464	13	20	2950	124.808	8.04637e-21	8.04637e-21	8.04637e-21
KEGG_PATHWAY	pae02040:Flagellar assembly	10	66.6667	2.14921e-16	P72151, G3XD90, Q51467, Q9HUL2, Q9HUL1, Q9I4P2, Q9I4N0, Q9I3Q6, G3XD73, Q51464	10	35	1705	48.7143	6.66134e-16	6.44764e-16	4.29842e-16
GOTERM_CC_DIRECT	GO:0009425~bacterial-type flagellum basal body	4	26.6667	8.42715e-06	Q51467, Q9HTV7, Q9I3Q5, Q51464	13	10	2644	81.3538	9.26948e-05	9.26987e-05	9.26987e-05
UP_KEYWORDS	Bacterial flagellum	4	26.6667	8.77381e-06	P72151, Q51467, Q9I4P2, Q51464	15	17	5494	86.1804	0.000219322	6.57046e-05	5.25637e-05
UP_KEYWORDS	Cilium	4	26.6667	1.05127e-05	G3XD90, Q9I4P2, Q9I4N0, G3XD73	15	18	5494	81.3926	0.000262785	6.57046e-05	5.25637e-05
UP_KEYWORDS	Flagellum	4	26.6667	1.05127e-05	G3XD90, Q9I4P2, Q9I4N0, G3XD73	15	18	5494	81.3926	0.000262785	6.57046e-05	5.25637e-05
UP_KEYWORDS	Cell projection	4	26.6667	1.05127e-05	G3XD90, Q9I4P2, Q9I4N0, G3XD73	15	18	5494	81.3926	0.000262785	6.57046e-05	5.25637e-05
GOTERM_BP_DIRECT	GO:0006935~chemotaxis	5	33.3333	1.46834e-05	Q51467, Q9HTV7, Q9I4N0, Q9I3Q5, Q51464	13	41	2950	27.6735	0.000132142	6.60751e-05	6.60751e-05
KEGG_PATHWAY	pae02030:Bacterial chemotaxis	5	33.3333	4.85437e-05	G3XD90, Q9HUL2, Q9HUL1, G3XD73, Q51464	10	45	1705	18.9444	0.000145624	7.28156e-05	4.85437e-05
GOTERM_CC_DIRECT	GO:0031514~motile cilium	4	26.6667	5.61418e-05	G3XD90, Q9I4P2, Q9I4N0, G3XD73	13	18	2644	45.1966	0.000617386	0.00030878	0.00030878
GOTERM_BP_DIRECT	GO:0071978~bacterial-type flagellum-dependent swarming motility	4	26.6667	7.58802e-05	G3XD90, Q9HUL2, Q9HUL1, G3XD73	13	22	2950	41.2587	0.000682715	0.000227641	0.000227641
GOTERM_BP_DIRECT	GO:0044781~bacterial-type flagellum organization	3	20	0.000315051	P72151, Q51467, Q9I3P8	13	7	2950	97.2527	0.00283189	0.000708864	0.000708864
INTERPRO	IPR022522:Flagellar motor stator, MotA	2	13.3333	0.00564344	Q9HUL1, G3XD73	15	2	4955	330.333	0.127006	0.0338607	0.0338607
INTERPRO	IPR005503:Flagellar basal body-associated protein FliL	2	13.3333	0.00564344	Q9HTV7, Q9I3Q5	15	2	4955	330.333	0.127006	0.0338607	0.0338607
INTERPRO	IPR025713:Motility protein B, N-terminal domain	2	13.3333	0.00564344	G3XD90, Q9HUL2	15	2	4955	330.333	0.127006	0.0338607	0.0338607
INTERPRO	IPR001029:Flagellin, D0/D1 domain	2	13.3333	0.00564344	P72151, Q9I4P2	15	2	4955	330.333	0.127006	0.0338607	0.0338607
INTERPRO	IPR021136:Flagellar hook-length control protein-like, C-terminal	2	13.3333	0.00845406	Q9I3N8, Q9I3Q6	15	3	4955	220.222	0.184342	0.0405795	0.0405795
GOTERM_MF_DIRECT	GO:0005198~structural molecule activity	2	13.3333	0.0135544	P72151, Q9I4P2	8	7	3597	128.464	0.0911088	0.0474405	0.0474405
GOTERM_MF_DIRECT	GO:0003774~motor activity	2	13.3333	0.0135544	Q9I4N0, Q51464	8	7	3597	128.464	0.0911088	0.0474405	0.0474405
UP_KEYWORDS	Flagellar rotation	2	13.3333	0.0151992	Q51467, Q51464	15	6	5494	122.089	0.318117	0.0737977	0.0590382
UP_KEYWORDS	Bacterial flagellum biogenesis	2	13.3333	0.0177115	Q9I3P8, Q9I4P4	15	7	5494	104.648	0.360299	0.0737977	0.0590382
INTERPRO	IPR002898:MotA/TolQ/ExbB proton channel	2	13.3333	0.0196229	Q9HUL1, G3XD73	15	7	4955	94.381	0.378508	0.0784917	0.0784917
UP_KEYWORDS	Membrane	8	53.3333	0.0264856	G3XD90, Q51467, Q9HUL2, Q9I3P8, Q9HUL1, Q9I3Q5, G3XD73, Q51464	15	1281	5494	2.28738	0.488836	0.0945913	0.075673
INTERPRO	IPR006665:Outer membrane protein, OmpA/MotB, C-terminal	2	13.3333	0.0388878	G3XD90, Q9HUL2	15	14	4955	47.1905	0.614008	0.13333	0.13333
UP_KEYWORDS	Chemotaxis	2	13.3333	0.0473979	Q51467, Q51464	15	19	5494	38.5544	0.702978	0.148118	0.118495
GOTERM_MF_DIRECT	GO:0008565~protein transporter activity	2	13.3333	0.0643714	Q9HUL1, G3XD73	8	34	3597	26.4485	0.37234	0.1502	0.1502
PAS domain
Q9HZJ0	Unannotated
Q9I133	tyrR
Q9I572	tyrR
Category	Term	Count	%	PValue	Genes	List Total	Pop Hits	Pop Total	Fold Enrichment	Bonferroni	Benjamini	FDR
INTERPRO	IPR025944:Sigma-54 interaction domain, conserved site	2	66.6667	0.00363269	Q9I572, Q9I133	2	18	4955	275.278	0.0322232	0.0133199	0.0133199
INTERPRO	IPR025662:Sigma-54 interaction domain, ATP-binding site 1	2	66.6667	0.00403633	Q9I572, Q9I133	2	20	4955	247.75	0.0357459	0.0133199	0.0133199
INTERPRO	IPR002078:RNA polymerase sigma factor 54 interaction domain	2	66.6667	0.00443996	Q9I572, Q9I133	2	22	4955	225.227	0.0392573	0.0133199	0.0133199
COG_ONTOLOGY	Transcription / Amino acid transport and metabolism	2	66.6667	0.00764526	Q9I572, Q9I133	2	10	1308	130.8	0.0152321	0.00764526	0.00764526
INTERPRO	IPR000014:PAS domain	2	66.6667	0.00887992	Q9I572, Q9I133	2	44	4955	112.614	0.0771386	0.0199798	0.0199798
INTERPRO	IPR009057:Homeodomain-like	2	66.6667	0.0270434	Q9I572, Q9I133	2	134	4955	36.9776	0.218658	0.045106	0.045106
INTERPRO	IPR003593:AAA+ ATPase domain	2	66.6667	0.0300706	Q9I572, Q9I133	2	149	4955	33.255	0.240267	0.045106	0.045106
INTERPRO	IPR027417:P-loop containing nucleoside triphosphate hydrolase	2	66.6667	0.0561049	Q9I572, Q9I133	2	278	4955	17.8237	0.405279	0.0721349	0.0721349
GOTERM_BP_DIRECT	GO:0006355~regulation of transcription, DNA-templated	2	66.6667	0.0867797	Q9I572, Q9I133	2	256	2950	11.5234	0.364848	0.344068	0.344068
GOTERM_MF_DIRECT	GO:0003677~DNA binding	2	66.6667	0.0984153	Q9I572, Q9I133	2	354	3597	10.161	0.267143	0.177648	0.177648
Pilus Motility
G3XD28	pilM
G3XD30	pilN
P22608	pilB
Q9I0G1	Unannotated
Q9I5N9	gspE
Q00512	gspE
Q9HTY0	gspE
P22609	pilC
Q9I0G2	Unannotated
Q9I5N8	gspF
Q00513	gspF
G3XCZ0	fimT
Q9HVN0	fimT
G3XD84	pilV
Q9I0G5	Unannotated
G3XCX7	pilP
G3XD15	Unannotated
Q9HVM8	pilY1
G3XCX3	pilU
G3XD51	pilO
P04739	pilA
Q9I5G6	Unannotated
Q9I5R2	Unannotated
Category	Term	Count	%	PValue	Genes	List Total	Pop Hits	Pop Total	Fold Enrichment	Bonferroni	Benjamini	FDR
COG_ONTOLOGY	Cell motility and secretion / Intracellular trafficking and secretion	11	47.8261	2.34683e-17	G3XCZ0, G3XD15, P22609, Q9I0G1, Q9HVN0, Q9HTY0, Q9I0G2, Q9I5R2, P04739, Q9HVM8, G3XCX3	12	27	1308	44.4074	7.04049e-17	4.69366e-17	4.69366e-17
GOTERM_BP_DIRECT	GO:0043107~type IV pilus-dependent motility	10	43.4783	1.71405e-16	G3XD28, G3XCZ0, G3XD15, P22608, G3XCX7, P04739, G3XD30, G3XD51, G3XD84, G3XCX3	19	20	2950	77.6316	1.9984e-15	1.54265e-15	1.54265e-15
GOTERM_BP_DIRECT	GO:0043683~type IV pilus biogenesis	8	34.7826	2.70104e-14	G3XD28, G3XCZ0, G3XD15, Q9HVN0, G3XCX7, G3XD30, G3XD51, G3XD84	19	11	2950	112.919	2.42806e-13	1.21547e-13	1.21547e-13
GOTERM_BP_DIRECT	GO:0015628~protein secretion by the type II secretion system	8	34.7826	3.76475e-11	Q9I5N9, G3XCZ0, Q9I5N8, P22609, Q00513, Q9HVN0, Q00512, Q9I0G2	19	25	2950	49.6842	3.38827e-10	1.12942e-10	1.12942e-10
INTERPRO	IPR001482:Type II secretion system protein E	6	26.087	4.55047e-11	Q9I5N9, Q9I0G1, P22608, Q00512, Q9HTY0, G3XCX3	22	8	4955	168.92	1.13762e-09	1.13762e-09	8.19084e-10
GOTERM_MF_DIRECT	GO:0008565~protein transporter activity	7	30.4348	3.98462e-10	Q9I5N9, G3XCZ0, Q9I5N8, Q00513, Q9HVN0, P22608, Q00512	13	34	3597	56.9661	1.99231e-09	1.99231e-09	1.99231e-09
INTERPRO	IPR012902:Prokaryotic N-terminal methylation site	6	26.087	6.77681e-09	Q9I0G5, G3XCZ0, G3XD15, Q9HVN0, P04739, G3XD84	22	18	4955	75.0758	1.6942e-07	8.47101e-08	6.09913e-08
KEGG_PATHWAY	pae03070:Bacterial secretion system	8	34.7826	8.16367e-09	Q9I0G5, Q9I5N9, Q9I5N8, Q9I0G1, Q00513, Q00512, Q9HTY0, Q9I0G2	9	92	1705	16.4734	1.63273e-08	1.63273e-08	1.63273e-08
GOTERM_CC_DIRECT	GO:0015627~type II protein secretion system complex	6	26.087	2.41654e-08	Q9I5N9, G3XCZ0, Q9I5N8, Q00513, Q9HVN0, Q00512	17	17	2644	54.8927	2.17489e-07	2.17489e-07	2.17489e-07
INTERPRO	IPR003004:GspF/PilC family	4	17.3913	2.61824e-07	Q9I5N8, P22609, Q00513, Q9I0G2	22	4	4955	225.227	6.54558e-06	2.18187e-06	1.57094e-06
INTERPRO	IPR018076:Type II secretion system F domain	4	17.3913	1.30199e-06	Q9I5N8, P22609, Q00513, Q9I0G2	22	6	4955	150.152	3.25493e-05	8.13745e-06	5.85896e-06
UP_KEYWORDS	Protein transport	5	21.7391	2.58055e-05	Q9I5N9, P22609, Q00513, P22608, Q00512	23	45	5494	26.5411	0.000490191	0.000490305	0.000387083
INTERPRO	IPR007831:General secretory system II, protein E, N-terminal	3	13.0435	5.11987e-05	Q9I0G1, P22608, Q9HTY0	22	3	4955	225.227	0.00127918	0.000255993	0.000184315
UP_KEYWORDS	Fimbrium biogenesis	3	13.0435	0.000422445	P22609, P22608, Q9HVM8	23	8	5494	89.5761	0.00799602	0.00401323	0.00316834
INTERPRO	IPR027417:P-loop containing nucleoside triphosphate hydrolase	6	26.087	0.0051878	Q9I5N9, Q9I0G1, P22608, Q00512, Q9HTY0, G3XCX3	22	278	4955	4.86102	0.121933	0.0216158	0.0155634
UP_KEYWORDS	Membrane	12	52.1739	0.00563175	Q9I0G5, G3XCZ0, Q9I5N8, G3XD15, P22609, Q00513, Q9I0G2, Q9I5R2, G3XD30, G3XD51, G3XD84, Q9HVM8	23	1281	5494	2.23765	0.101749	0.0286921	0.0226517
UP_KEYWORDS	Transmembrane helix	11	47.8261	0.00719425	Q9I0G5, G3XCZ0, Q9I5N8, G3XD15, P22609, Q00513, Q9I0G2, Q9I5R2, G3XD30, G3XD51, G3XD84	23	1125	5494	2.33561	0.128191	0.0286921	0.0226517
UP_KEYWORDS	Fimbrium	2	8.69565	0.00799343	P04739, Q9HVM8	23	2	5494	238.87	0.141429	0.0286921	0.0226517
INTERPRO	IPR011850:General secretion pathway protein F	2	8.69565	0.00845918	Q9I5N8, Q00513	22	2	4955	225.227	0.191342	0.0234977	0.0169184
INTERPRO	IPR001992:Type II secretion system conserved site	2	8.69565	0.00845918	P22609, Q00513	22	2	4955	225.227	0.191342	0.0234977	0.0169184
INTERPRO	IPR013369:Type II secretion system GspE	2	8.69565	0.00845918	Q9I5N9, Q00512	22	2	4955	225.227	0.191342	0.0234977	0.0169184
GOTERM_MF_DIRECT	GO:0005524~ATP binding	6	26.087	0.00886215	Q9I5N9, Q9I0G1, P22608, Q00512, Q9HTY0, G3XCX3	13	426	3597	3.89707	0.0435323	0.0221554	0.0221554
UP_KEYWORDS	Transmembrane	11	47.8261	0.00906067	Q9I0G5, G3XCZ0, Q9I5N8, G3XD15, P22609, Q00513, Q9I0G2, Q9I5R2, G3XD30, G3XD51, G3XD84	23	1161	5494	2.26319	0.15881	0.0286921	0.0226517
INTERPRO	IPR022346:General secretion pathway, GspH	2	8.69565	0.0168502	G3XCZ0, Q9HVN0	22	4	4955	112.614	0.346128	0.0421254	0.0303303
UP_KEYWORDS	Transport	5	21.7391	0.0492631	Q9I5N9, P22609, Q00513, P22608, Q00512	23	354	5494	3.37386	0.617046	0.133714	0.105564
SMART	SM00382:AAA	3	13.0435	0.0517686	Q9I5N9, Q9I0G1, Q9HTY0	4	148	1071	5.42736	0.100857	0.103537	0.103537
GOTERM_CC_DIRECT	GO:0016021~integral component of membrane	11	47.8261	0.061308	Q9I0G5, G3XCZ0, Q9I5N8, G3XD15, P22609, Q00513, Q9I0G2, Q9I5R2, G3XD30, G3XD51, G3XD84	17	1067	2644	1.6034	0.434141	0.275886	0.275886
GOTERM_BP_DIRECT	GO:0006810~transport	3	13.0435	0.0750707	Q9I0G1, Q9HTY0, G3XCX3	19	75	2950	6.21053	0.504576	0.168909	0.168909
Acyltransferase
Q9HYZ9	Unannotated
Q9I0H8	Unannotated
Q9I385	rssA
Category	Term	Count	%	PValue	Genes	List Total	Pop Hits	Pop Total	Fold Enrichment	Bonferroni	Benjamini	FDR
INTERPRO	IPR016035:Acyl transferase/acyl hydrolase/lysophospholipase	3	100	1.22214e-06	Q9I385, Q9I0H8, Q9HYZ9	3	6	4955	825.833	1.22214e-06	2.44428e-06	2.44428e-06
INTERPRO	IPR002641:Patatin/Phospholipase A2-related	2	66.6667	0.00121065	Q9I385, Q9HYZ9	3	3	4955	1101.11	0.00121065	0.00121065	0.00121065
GOTERM_BP_DIRECT	GO:0006629~lipid metabolic process	2	66.6667	0.0135156	Q9I385, Q9HYZ9	3	20	2950	98.3333	0.0400014	0.0270313	0.0270313
GOTERM_MF_DIRECT	GO:0016787~hydrolase activity	2	66.6667	0.0177926	Q9I385, Q9HYZ9	2	64	3597	56.2031	0.0177926	0.0177926	0.0177926
MCP Methyltransferase
G3XCT5	pilK
Q9I6V7	cheR
O87131	cheR
Q9HXT5	wspC
Category	Term	Count	%	PValue	Genes	List Total	Pop Hits	Pop Total	Fold Enrichment	Bonferroni	Benjamini	FDR
INTERPRO	IPR022641:MCP methyltransferase, CheR-type, all-alpha domain, N-terminal	4	100	1.97398e-10	Q9HXT5, G3XCT5, Q9I6V7, O87131	4	4	4955	1238.75	1.38179e-09	4.60596e-10	4.60596e-10
INTERPRO	IPR022642:MCP methyltransferase, CheR-type, SAM-binding domain, C-terminal	4	100	1.97398e-10	Q9HXT5, G3XCT5, Q9I6V7, O87131	4	4	4955	1238.75	1.38179e-09	4.60596e-10	4.60596e-10
INTERPRO	IPR000780:MCP methyltransferase, CheR-type	4	100	1.97398e-10	Q9HXT5, G3XCT5, Q9I6V7, O87131	4	4	4955	1238.75	1.38179e-09	4.60596e-10	4.60596e-10
SMART	SM00138:MeTrc	4	100	1.95912e-08	Q9HXT5, G3XCT5, Q9I6V7, O87131	4	4	1071	267.75	1.95912e-08	1.95912e-08	1.95912e-08
GOTERM_MF_DIRECT	GO:0008983~protein-glutamate O-methyltransferase activity	3	75	1.39134e-06	G3XCT5, Q9I6V7, O87131	4	3	3597	899.25	2.78267e-06	2.78267e-06	2.78267e-06
UP_KEYWORDS	Methyltransferase	4	100	1.65657e-06	Q9HXT5, G3XCT5, Q9I6V7, O87131	4	66	5494	83.2424	6.62624e-06	6.62626e-06	6.62626e-06
COG_ONTOLOGY	Cell motility and secretion / Signal transduction mechanisms	3	75	0.000159106	Q9HXT5, Q9I6V7, O87131	3	17	1308	76.9412	0.000318186	0.000159106	0.000159106
UP_KEYWORDS	S-adenosyl-L-methionine	3	75	0.000489921	Q9HXT5, Q9I6V7, O87131	4	71	5494	58.0352	0.00195825	0.000979843	0.000979843
UP_KEYWORDS	Transferase	4	100	0.000749672	Q9HXT5, G3XCT5, Q9I6V7, O87131	4	500	5494	10.988	0.00299532	0.000999562	0.000999562
INTERPRO	IPR026024:Chemotaxis protein methyltransferase CheR	2	50	0.00121065	Q9I6V7, O87131	4	2	4955	1238.75	0.00844386	0.00211864	0.00211864
KEGG_PATHWAY	pae02020:Two-component system	4	100	0.00121841	Q9HXT5, G3XCT5, Q9I6V7, O87131	4	183	1705	9.31694	0.00243533	0.00243681	0.00243681
UP_SEQ_FEATURE	domain:CheR-type methyltransferase	2	50	0.00163934	Q9I6V7, O87131	2	2	1220	610	0.00654127	0.00819672	0.00819672
PIR_SUPERFAMILY	PIRSF000410:chemotaxis protein methyltransferase 3	2	50	0.00266312	Q9I6V7, O87131	2	2	751	375.5	0.00266312	0.00266312	0.00266312
UP_SEQ_FEATURE	region of interest:S-adenosyl-L-methionine binding	2	50	0.0057377	Q9I6V7, O87131	2	7	1220	174.286	0.022754	0.0143443	0.0143443
UP_SEQ_FEATURE	binding site:S-adenosyl-L-methionine	2	50	0.0114754	Q9I6V7, O87131	2	14	1220	87.1429	0.0451176	0.0191257	0.0191257
GOTERM_MF_DIRECT	GO:0008757~S-adenosylmethionine-dependent methyltransferase activity	2	50	0.0289158	Q9HXT5, G3XCT5	4	35	3597	51.3857	0.0569955	0.0289158	0.0289158
KEGG_PATHWAY	pae02030:Bacterial chemotaxis	2	50	0.0771516	Q9I6V7, O87131	4	45	1705	18.9444	0.148351	0.0771516	0.0771516
Sigma Factor 54 Interaction Domain
Q9I0H3	norR
Q9I362	nifA
Category	Term	Count	%	PValue	Genes	List Total	Pop Hits	Pop Total	Fold Enrichment	Bonferroni	Benjamini	FDR
INTERPRO	IPR002197:DNA binding HTH domain, Fis-type	2	100	0.00343088	Q9I362, Q9I0H3	2	17	4955	291.471	0.0304575	0.00998991	0.00998991
INTERPRO	IPR025943:Sigma-54 interaction domain, ATP-binding site 2	2	100	0.00403633	Q9I362, Q9I0H3	2	20	4955	247.75	0.0357459	0.00998991	0.00998991
INTERPRO	IPR025662:Sigma-54 interaction domain, ATP-binding site 1	2	100	0.00403633	Q9I362, Q9I0H3	2	20	4955	247.75	0.0357459	0.00998991	0.00998991
INTERPRO	IPR002078:RNA polymerase sigma factor 54 interaction domain	2	100	0.00443996	Q9I362, Q9I0H3	2	22	4955	225.227	0.0392573	0.00998991	0.00998991
UP_KEYWORDS	Two-component regulatory system	2	100	0.0125592	Q9I362, Q9I0H3	2	69	5494	79.6232	0.0612381	0.0753549	0.0251183
GOTERM_BP_DIRECT	GO:0000160~phosphorelay signal transduction system	2	100	0.0257627	Q9I362, Q9I0H3	2	76	2950	38.8158	0.0991365	0.103051	0.103051
INTERPRO	IPR009057:Homeodomain-like	2	100	0.0270434	Q9I362, Q9I0H3	2	134	4955	36.9776	0.218658	0.045106	0.045106
GOTERM_MF_DIRECT	GO:0043565~sequence-specific DNA binding	2	100	0.029191	Q9I362, Q9I0H3	2	105	3597	34.2571	0.0575299	0.058382	0.058382
INTERPRO	IPR003593:AAA+ ATPase domain	2	100	0.0300706	Q9I362, Q9I0H3	2	149	4955	33.255	0.240267	0.045106	0.045106
INTERPRO	IPR027417:P-loop containing nucleoside triphosphate hydrolase	2	100	0.0561049	Q9I362, Q9I0H3	2	278	4955	17.8237	0.405279	0.0721349	0.0721349
UP_KEYWORDS	ATP-binding	2	100	0.0664361	Q9I362, Q9I0H3	2	365	5494	15.0521	0.290879	0.0857299	0.0664361
GOTERM_CC_DIRECT	GO:0005622~intracellular	2	100	0.0707262	Q9I362, Q9I0H3	2	187	2644	14.139	0.0707262	0.0707262	0.0707262
UP_KEYWORDS	Nucleotide-binding	2	100	0.0773571	Q9I362, Q9I0H3	2	425	5494	12.9271	0.331397	0.0857299	0.0773571
UP_KEYWORDS	Transcription regulation	2	100	0.0780852	Q9I362, Q9I0H3	2	429	5494	12.8065	0.334031	0.0857299	0.0780852
UP_KEYWORDS	Transcription	2	100	0.0791773	Q9I362, Q9I0H3	2	435	5494	12.6299	0.337966	0.0857299	0.0791773
UP_KEYWORDS	DNA-binding	2	100	0.0857299	Q9I362, Q9I0H3	2	471	5494	11.6645	0.361189	0.0857299	0.0857299
GOTERM_BP_DIRECT	GO:0006355~regulation of transcription, DNA-templated	2	100	0.0867797	Q9I362, Q9I0H3	2	256	2950	11.5234	0.304492	0.173559	0.173559
RNA Ligase
Q9HT99	rtcB
Q9HVK1	rtcB
Q9HVK3	rtcR
Category	Term	Count	%	PValue	Genes	List Total	Pop Hits	Pop Total	Fold Enrichment	Bonferroni	Benjamini	FDR
INTERPRO	IPR001233:RtcB family	2	66.6667	0.000807184	Q9HVK1, Q9HT99	3	2	4955	1651.67	0.00643926	0.00645747	0.00645747
GOTERM_MF_DIRECT	GO:0008452~RNA ligase activity	2	66.6667	0.00111188	Q9HVK1, Q9HT99	3	2	3597	1199	0.00554707	0.00555942	0.00555942
GOTERM_BP_DIRECT	GO:0006396~RNA processing	2	66.6667	0.00406435	Q9HVK1, Q9HT99	3	6	2950	327.778	0.00811218	0.0081287	0.0081287
Lipid A Biosynthesis
Q9HYZ8	lpxL
Q9I7B5	htrB
Category	Term	Count	%	PValue	Genes	List Total	Pop Hits	Pop Total	Fold Enrichment	Bonferroni	Benjamini	FDR
INTERPRO	IPR004960:Bacterial lipid A biosynthesis acyltransferase	2	100	0.000403633	Q9I7B5, Q9HYZ8	2	2	4955	2477.5	0.000807102	0.000807265	0.000807265
PIR_SUPERFAMILY	PIRSF026649:lipid A biosynthesis lauroyl acyltransferase	2	100	0.00266312	Q9I7B5, Q9HYZ8	2	2	751	375.5	0.00266312	0.00266312	0.00266312
KEGG_PATHWAY	pae00540:Lipopolysaccharide biosynthesis	2	100	0.0129032	Q9I7B5, Q9HYZ8	2	22	1705	77.5	0.02564	0.0258065	0.0258065
UP_KEYWORDS	Transferase	2	100	0.0910084	Q9I7B5, Q9HYZ8	2	500	5494	10.988	0.487234	0.728067	0.728067
Disulfide bond formation
P21482	dsbB
P57701	dsbB
Category	Term	Count	%	PValue	Genes	List Total	Pop Hits	Pop Total	Fold Enrichment	Bonferroni	Benjamini	FDR
INTERPRO	IPR023380:Disulphide bond formation protein DsbB-like domain	2	100	0.000403633	P21482, P57701	2	2	4955	2477.5	0.00121041	0.000403633	0.000403633
INTERPRO	IPR003752:Disulphide bond formation protein DsbB/BdbC	2	100	0.000403633	P21482, P57701	2	2	4955	2477.5	0.00121041	0.000403633	0.000403633
INTERPRO	IPR022920:Disulphide bond formation protein DsbB	2	100	0.000403633	P21482, P57701	2	2	4955	2477.5	0.00121041	0.000403633	0.000403633
UP_SEQ_FEATURE	chain:Disulfide bond formation protein B 1	2	100	0.00163934	P21482, P57701	2	2	1220	610	0.00816989	0.00491803	0.00163934
UP_SEQ_FEATURE	chain:Disulfide bond formation protein B 2	2	100	0.00163934	P21482, P57701	2	2	1220	610	0.00816989	0.00491803	0.00163934
UP_KEYWORDS	Redox-active center	2	100	0.00382235	P21482, P57701	2	21	5494	261.619	0.0412514	0.0240262	0.0043684
GOTERM_MF_DIRECT	GO:0015035~protein disulfide oxidoreductase activity	2	100	0.00444815	P21482, P57701	2	16	3597	224.812	0.00887652	0.0088963	0.0088963
UP_KEYWORDS	Chaperone	2	100	0.00637059	P21482, P57701	2	35	5494	156.971	0.0678864	0.0240262	0.00637059
GOTERM_BP_DIRECT	GO:0006457~protein folding	2	100	0.00779661	P21482, P57701	2	23	2950	128.261	0.0232079	0.0155932	0.0155932
UP_KEYWORDS	Disulfide bond	2	100	0.00800874	P21482, P57701	2	44	5494	124.864	0.0846518	0.0240262	0.00800874
UP_KEYWORDS	Electron transport	2	100	0.0087368	P21482, P57701	2	48	5494	114.458	0.0920147	0.0240262	0.0087368
GOTERM_BP_DIRECT	GO:0055114~oxidation-reduction process	2	100	0.0162712	P21482, P57701	2	48	2950	61.4583	0.0480236	0.0162712	0.0162712
UP_SEQ_FEATURE	disulfide bond	2	100	0.0254098	P21482, P57701	2	31	1220	39.3548	0.120755	0.0354098	0.0254098
UP_SEQ_FEATURE	topological domain:Periplasmic	2	100	0.0270492	P21482, P57701	2	33	1220	36.9697	0.128125	0.0354098	0.0270492
UP_SEQ_FEATURE	topological domain:Cytoplasmic	2	100	0.0295082	P21482, P57701	2	36	1220	33.8889	0.139087	0.0354098	0.0295082
GOTERM_MF_DIRECT	GO:0009055~electron carrier activity	2	100	0.0353072	P21482, P57701	2	127	3597	28.3228	0.0693678	0.0353072	0.0353072
UP_KEYWORDS	Cell inner membrane	2	100	0.0402257	P21482, P57701	2	221	5494	24.8597	0.363409	0.0884965	0.0402257
UP_KEYWORDS	Oxidoreductase	2	100	0.0526028	P21482, P57701	2	289	5494	19.0104	0.44811	0.0890972	0.0526028
UP_KEYWORDS	Transport	2	100	0.0644339	P21482, P57701	2	354	5494	15.5198	0.519361	0.0890972	0.0644339
UP_KEYWORDS	Cell membrane	2	100	0.064798	P21482, P57701	2	356	5494	15.4326	0.521414	0.0890972	0.064798
Metallocarboxypeptidase activity
Q9HZF4	Unannotated
Q9I012	Unannotated
Category	Term	Count	%	PValue	Genes	List Total	Pop Hits	Pop Total	Fold Enrichment	Bonferroni	Benjamini	FDR
INTERPRO	IPR000834:Peptidase M14, carboxypeptidase A	2	100	0.000403633	Q9HZF4, Q9I012	2	2	4955	2477.5	0.000403633	0.000403633	0.000403633
GOTERM_MF_DIRECT	GO:0004181~metallocarboxypeptidase activity	2	100	0.000556019	Q9HZF4, Q9I012	2	2	3597	1798.5	0.00111173	0.00111204	0.00111204
GOTERM_MF_DIRECT	GO:0008270~zinc ion binding	2	100	0.028635	Q9HZF4, Q9I012	2	103	3597	34.9223	0.05645	0.028635	0.028635
Cell Division
Q9HYZ5	minE
Q9HYZ6	minD
Q9HYZ7	minC
Category	Term	Count	%	PValue	Genes	List Total	Pop Hits	Pop Total	Fold Enrichment	Bonferroni	Benjamini	FDR
UP_KEYWORDS	Cell cycle	3	100	0.000117302	Q9HYZ6, Q9HYZ5, Q9HYZ7	3	60	5494	91.5667	0.000586372	0.000293255	0.000293255
UP_KEYWORDS	Cell division	3	100	0.000117302	Q9HYZ6, Q9HYZ5, Q9HYZ7	3	60	5494	91.5667	0.000586372	0.000293255	0.000293255
GOTERM_BP_DIRECT	GO:0051301~cell division	2	66.6667	0.0342832	Q9HYZ6, Q9HYZ5	3	51	2950	38.5621	0.188854	0.205699	0.205699
Coiled coil
Q9HXR1	LiaH
Q9HXR4	Unannotated
Category	Term	Count	%	PValue	Genes	List Total	Pop Hits	Pop Total	Fold Enrichment	Bonferroni	Benjamini	FDR
UP_KEYWORDS	Coiled coil	2	100	0.0271205	Q9HXR4, Q9HXR1	2	149	5494	36.8725	0	0.0271205	0.0271205
Sulfatase
Q9I338	Unannotated
Q9I4M0	MdoB
Category	Term	Count	%	PValue	Genes	List Total	Pop Hits	Pop Total	Fold Enrichment	Bonferroni	Benjamini	FDR
INTERPRO	IPR000917:Sulfatase	2	100	0.00181635	Q9I338, Q9I4M0	2	9	4955	550.556	0.00724562	0.00322906	0.00322906
GOTERM_MF_DIRECT	GO:0008484~sulfuric ester hydrolase activity	2	100	0.00222408	Q9I338, Q9I4M0	2	8	3597	449.625	0.0044432	0.00444815	0.00444815
INTERPRO	IPR017850:Alkaline-phosphatase-like, core domain	2	100	0.0024218	Q9I338, Q9I4M0	2	12	4955	412.917	0.00965205	0.00322906	0.00322906
INTERPRO	IPR017849:Alkaline phosphatase-like, alpha/beta/alpha	2	100	0.0024218	Q9I338, Q9I4M0	2	12	4955	412.917	0.00965205	0.00322906	0.00322906
GOTERM_BP_DIRECT	GO:0008152~metabolic process	2	100	0.0247458	Q9I338, Q9I4M0	2	73	2950	40.411	0.0247458	0.0247458	0.0247458
