# Supplementary material for: Defining hierarchical protein interaction networks from spectral analysis of bacterial proteomes
Source: eLife. 2022 Aug 17;11:e74104. doi: 10.7554/eLife.74104 (PMC9427106; doi:10.7554/eLife.74104)
Supplement: Supplementary file 6. [file elife-74104-supp6.xlsx]

## Sheet: Description
Supplementary File 6: Data related to gene co-occurrence, gene fusion, gene neighborhood, and co-expression data using pilA in P. aeruginosa (PAO1) as a query protein.
Names of tabs indicate computational method used to identify proteins associated with PilA
Each table was generated from the STRING database, subset for a specific computational method, set to a 'low-confidence' threshold to maximize number of proteins identified.

## Sheet: Gene Co-occurrence
#node1	node2	node1_string_id	node2_string_id	neighborhood_on_chromosome	gene_fusion	phylogenetic_cooccurrence	homology	coexpression	experimentally_determined_interaction	database_annotated	automated_textmining	combined_score
PA0020	pilT	208964.PA0020	208964.PA0395	0	0	0.366	0	0	0	0	0	0.366
PA0020	PA1624	208964.PA0020	208964.PA1624	0	0	0.179	0	0	0	0	0	0.179
PA0020	pilA	208964.PA0020	208964.PA4525	0	0	0.327	0	0	0	0	0	0.327
PA0020	pilD	208964.PA0020	208964.PA4528	0	0	0.248	0	0	0	0	0	0.247
PA0020	pilQ	208964.PA0020	208964.PA5040	0	0	0.767	0	0	0	0	0	0.767
PA0020	pilO	208964.PA0020	208964.PA5042	0	0	0.782	0	0	0	0	0	0.782
PA0020	pilN	208964.PA0020	208964.PA5043	0	0	0.781	0	0	0	0	0	0.781
PA0020	pilM	208964.PA0020	208964.PA5044	0	0	0.777	0	0	0	0	0	0.777
PA1624	pilA	208964.PA1624	208964.PA4525	0	0	0.325	0	0	0	0	0	0.325
PA1624	PA4955	208964.PA1624	208964.PA4955	0	0	0.632	0	0	0	0	0	0.632
PA1624	pilO	208964.PA1624	208964.PA5042	0	0	0.166	0	0	0	0	0	0.165
PA1624	pilN	208964.PA1624	208964.PA5043	0	0	0.204	0	0	0	0	0	0.204
PA2676	pilT	208964.PA2676	208964.PA0395	0	0	0.774	0	0	0	0	0	0.774
PA2676	pilA	208964.PA2676	208964.PA4525	0	0	0.322	0	0	0	0	0	0.321
PA2676	pilD	208964.PA2676	208964.PA4528	0	0	0.743	0	0	0	0	0	0.743
PA2676	pilQ	208964.PA2676	208964.PA5040	0	0	0.286	0	0	0	0	0	0.286
PA4955	pilA	208964.PA4955	208964.PA4525	0	0	0.344	0	0	0	0	0	0.343
pilA	pilT	208964.PA4525	208964.PA0395	0	0	0.35	0	0	0	0	0	0.349
pilA	pilD	208964.PA4525	208964.PA4528	0	0	0.347	0	0	0	0	0	0.347
pilA	pilQ	208964.PA4525	208964.PA5040	0	0	0.52	0	0	0	0	0	0.52
pilA	pilO	208964.PA4525	208964.PA5042	0	0	0.34	0	0	0	0	0	0.34
pilA	pilN	208964.PA4525	208964.PA5043	0	0	0.332	0	0	0	0	0	0.332
pilA	pilM	208964.PA4525	208964.PA5044	0	0	0.404	0	0	0	0	0	0.404
pilD	pilT	208964.PA4528	208964.PA0395	0	0	0.768	0	0	0	0	0	0.768
pilD	pilQ	208964.PA4528	208964.PA5040	0	0	0.488	0	0	0	0	0	0.487
pilD	pilO	208964.PA4528	208964.PA5042	0	0	0.302	0	0	0	0	0	0.302
pilD	pilN	208964.PA4528	208964.PA5043	0	0	0.298	0	0	0	0	0	0.298
pilD	pilM	208964.PA4528	208964.PA5044	0	0	0.381	0	0	0	0	0	0.381
pilM	pilT	208964.PA5044	208964.PA0395	0	0	0.576	0	0	0	0	0	0.576
pilM	pilQ	208964.PA5044	208964.PA5040	0	0	0.754	0	0	0	0	0	0.754
pilM	pilO	208964.PA5044	208964.PA5042	0	0	0.779	0	0	0	0	0	0.779
pilM	pilN	208964.PA5044	208964.PA5043	0	0	0.777	0	0	0	0	0	0.777
pilN	pilT	208964.PA5043	208964.PA0395	0	0	0.39	0	0	0	0	0	0.39
pilN	pilQ	208964.PA5043	208964.PA5040	0	0	0.762	0	0	0	0	0	0.762
pilN	pilO	208964.PA5043	208964.PA5042	0	0	0.784	0	0	0	0	0	0.784
pilO	pilT	208964.PA5042	208964.PA0395	0	0	0.41	0	0	0	0	0	0.41
pilO	pilQ	208964.PA5042	208964.PA5040	0	0	0.773	0	0	0	0	0	0.773
pilQ	pilT	208964.PA5040	208964.PA0395	0	0	0.617	0	0	0	0	0	0.617

## Sheet: Gene Fusion
#node1	node2	node1_string_id	node2_string_id	neighborhood_on_chromosome	gene_fusion	phylogenetic_cooccurrence	homology	coexpression	experimentally_determined_interaction	database_annotated	automated_textmining	combined_score
None identified

## Sheet: Gene Neighborhood
#node1	node2	node1_string_id	node2_string_id	neighborhood_on_chromosome	gene_fusion	phylogenetic_cooccurrence	homology	coexpression	experimentally_determined_interaction	database_annotated	automated_textmining	combined_score
PA4517	pilA	208964.PA4517	208964.PA4525	0.182	0	0	0	0	0	0	0	0.181
PA4965	ampD	208964.PA4965	208964.PA4522	0.405	0	0	0	0	0	0	0	0.404
PA4965	nadC	208964.PA4965	208964.PA4524	0.617	0	0	0	0	0	0	0	0.617
PA4965	pilA	208964.PA4965	208964.PA4525	0.218	0	0	0	0	0	0	0	0.218
PA4965	pilD	208964.PA4965	208964.PA4528	0.158	0	0	0	0	0	0	0	0.157
PA4965	coaE	208964.PA4965	208964.PA4529	0.151	0	0	0	0	0	0	0	0.15
ampD	nadC	208964.PA4522	208964.PA4524	0.293	0	0	0	0	0	0	0	0.293
ampD	pilA	208964.PA4522	208964.PA4525	0.337	0	0	0	0	0	0	0	0.337
ampD	pilD	208964.PA4522	208964.PA4528	0.194	0	0	0	0	0	0	0	0.194
ampD	coaE	208964.PA4522	208964.PA4529	0.324	0	0	0	0	0	0	0	0.323
ampD	yacG	208964.PA4522	208964.PA4530	0.241	0	0	0	0	0	0	0	0.24
bolA	pilA	208964.PA0857	208964.PA4525	0.187	0	0	0	0	0	0	0	0.187
coaE	nadC	208964.PA4529	208964.PA4524	0.4	0	0	0	0	0	0	0	0.4
coaE	pilA	208964.PA4529	208964.PA4525	0.34	0	0	0	0	0	0	0	0.34
coaE	pilD	208964.PA4529	208964.PA4528	0.845	0	0	0	0	0	0	0	0.845
coaE	yacG	208964.PA4529	208964.PA4530	0.851	0	0	0	0	0	0	0	0.851
nadC	pilA	208964.PA4524	208964.PA4525	0.405	0	0	0	0	0	0	0	0.404
nadC	pilD	208964.PA4524	208964.PA4528	0.281	0	0	0	0	0	0	0	0.281
nadC	yacG	208964.PA4524	208964.PA4530	0.268	0	0	0	0	0	0	0	0.268
pilA	sucC	208964.PA4525	208964.PA1588	0.17	0	0	0	0	0	0	0	0.169
pilA	sucD	208964.PA4525	208964.PA1589	0.168	0	0	0	0	0	0	0	0.167
pilA	pilD	208964.PA4525	208964.PA4528	0.253	0	0	0	0	0	0	0	0.252
pilA	yacG	208964.PA4525	208964.PA4530	0.34	0	0	0	0	0	0	0	0.34
pilD	yacG	208964.PA4528	208964.PA4530	0.849	0	0	0	0	0	0	0	0.849

## Sheet: Gene Coexpression
#node1	node2	node1_string_id	node2_string_id	neighborhood_on_chromosome	gene_fusion	phylogenetic_cooccurrence	homology	coexpression	experimentally_determined_interaction	database_annotated	automated_textmining	combined_score
PA0078	PA1675	208964.PA0078	208964.PA1675	0	0	0	0	0.179	0	0	0	0.179
PA0078	parS	208964.PA0078	208964.PA1798	0	0	0	0	0.179	0	0	0	0.179
PA0078	cupA4	208964.PA0078	208964.PA2131	0	0	0	0	0.175	0	0	0	0.175
PA0078	trmJ	208964.PA0078	208964.PA3817	0	0	0	0	0.178	0	0	0	0.177
PA0078	pilA	208964.PA0078	208964.PA4525	0	0	0	0	0.192	0	0	0	0.192
PA1675	mucC	208964.PA1675	208964.PA0765	0	0	0	0	0.295	0	0	0	0.295
PA1675	parS	208964.PA1675	208964.PA1798	0	0	0	0	0.198	0	0	0	0.198
PA1675	polB	208964.PA1675	208964.PA1886	0	0	0	0	0.329	0	0	0	0.329
PA1675	cupA4	208964.PA1675	208964.PA2131	0	0	0	0	0.27	0	0	0	0.27
PA1675	trmJ	208964.PA1675	208964.PA3817	0	0	0	0	0.304	0	0	0	0.304
PA1675	pilA	208964.PA1675	208964.PA4525	0	0	0	0	0.193	0	0	0	0.193
cupA4	mucC	208964.PA2131	208964.PA0765	0	0	0	0	0.413	0	0	0	0.412
cupA4	parS	208964.PA2131	208964.PA1798	0	0	0	0	0.415	0	0	0	0.414
cupA4	polB	208964.PA2131	208964.PA1886	0	0	0	0	0.422	0	0	0	0.422
cupA4	trmJ	208964.PA2131	208964.PA3817	0	0	0	0	0.271	0	0	0	0.271
cupA4	pilA	208964.PA2131	208964.PA4525	0	0	0	0	0.203	0	0	0	0.203
mucC	parS	208964.PA0765	208964.PA1798	0	0	0	0	0.452	0	0	0	0.452
mucC	polB	208964.PA0765	208964.PA1886	0	0	0	0	0.329	0	0	0	0.329
mucC	trmJ	208964.PA0765	208964.PA3817	0	0	0	0	0.202	0	0	0	0.202
mucC	pilA	208964.PA0765	208964.PA4525	0	0	0	0	0.179	0	0	0	0.179
parS	polB	208964.PA1798	208964.PA1886	0	0	0	0	0.454	0	0	0	0.454
parS	trmJ	208964.PA1798	208964.PA3817	0	0	0	0	0.454	0	0	0	0.454
parS	pilA	208964.PA1798	208964.PA4525	0	0	0	0	0.182	0	0	0	0.181
pilA	pilT	208964.PA4525	208964.PA0395	0	0	0	0	0.426	0	0	0	0.426
pilA	pilU	208964.PA4525	208964.PA0396	0	0	0	0	0.181	0	0	0	0.181
pilA	pilI	208964.PA4525	208964.PA0410	0	0	0	0	0.181	0	0	0	0.181
pilA	polB	208964.PA4525	208964.PA1886	0	0	0	0	0.191	0	0	0	0.191
pilA	trmJ	208964.PA4525	208964.PA3817	0	0	0	0	0.181	0	0	0	0.181
pilI	pilT	208964.PA0410	208964.PA0395	0	0	0	0	0.681	0	0	0	0.681
pilI	pilU	208964.PA0410	208964.PA0396	0	0	0	0	0.736	0	0	0	0.736
pilT	pilU	208964.PA0395	208964.PA0396	0	0	0	0.61	0.71	0	0	0	0.71
polB	trmJ	208964.PA1886	208964.PA3817	0	0	0	0	0.459	0	0	0	0.459
