# Supplementary material for: Defining hierarchical protein interaction networks from spectral analysis of bacterial proteomes
Source: eLife. 2022 Aug 17;11:e74104. doi: 10.7554/eLife.74104 (PMC9427106; doi:10.7554/eLife.74104)
Supplement: Supplementary file 7. [file elife-74104-supp7.xlsx]

## Sheet: Results related to Figure 5C
Supplementary File 7: Data related to Figure 7C
Pilus based motility
24 hrs
Strain	Replicate 1	Replicate 2	Replicate 3	Average	Standard deviation
PA01	9	10	10	9.66667	0.57735
PA0769-H09	3	4	3	3.33333	0.57735
PA0769-F08	3	4	4	3.66667	0.57735
PA0769+H09	7	8	9	8	1
F08+pPA0769	8	7	8	7.66667	0.57735
48 hrs
Strain	Replicate 1	Replicate 2	Replicate 3	Average	Standard deviation
PA01	22	21	20	21	1
PA0769-H09	7	7	5	6.33333	1.1547
PA0769-F08	10	7	10	9	1.73205
PA0769+H09	18	18	16	17.3333	1.1547
F08+pPA0769	15	16	16	15.6667	0.57735
72 hrs
Strain	Replicate 1	Replicate 2	Replicate 3	Average	Standard deviation
PA01	28	32	28	29.3333	2.3094
PA0769-H09	6	7	8	7	1
PA0769-F08	12	16	10	12.6667	3.05505
PA0769+H09	24	27	24	25	1.73205
F08+pPA0769	24	25	27	25.3333	1.52753
Flagellar-based motility
	Strain
	mPAO1	PA0769-H09	PA0769-F08	mPAO1-p(empty)	H09-pPA0769	F08-pPA0769	pilA
Replicate 1	44	49	48	50	40	40	48
Replicate 2	46	49	47	51	42	41	47
Replicate 3	43	46	45	48	35	40
Replicate 4		48		53	41	35
Replicate 5		51		47	48	40
Replicate 6		48		49	37	39
Replicate 7				49	37	48
Replicate 8				47	42	47
Replicate 9					38	40
Average	44.3333	48.5	46.6667	49.25	40	41.1111	47.5
Standard deviation	1.52753	1.64317	1.52753	2.05287	3.65148	4.01386	0.707107

## Sheet: Statistical Comparison
Statistical significance values related to Figure 5C.
	Dunnett's multiple comparisons test	Predicted (LS) mean diff.	95.00% CI of diff.	Below threshold?	Summary	Adjusted P Value
	0hr
	mPAO1+p(empty) vs. PA0769-H09	0	-1.654 to 1.654	No	ns	>0.9999
	mPAO1+p(empty) vs. H09+pPA0769	3.553e-15	-1.654 to 1.654	No	ns	>0.9999
	mPAO1+p(empty) vs. pilA	0	-1.654 to 1.654	No	ns	>0.9999
	24hr
	mPAO1+p(empty) vs. PA0769-H09	6.083	4.539 to 7.627	Yes	****	<0.0001
	mPAO1+p(empty) vs. H09+pPA0769	1.333	-0.3173 to 2.984	No	ns	0.1346
	mPAO1+p(empty) vs. pilA	8.333	6.683 to 9.984	Yes	****	<0.0001
	48hr
	mPAO1+p(empty) vs. PA0769-H09	12.33	10.68 to 13.99	Yes	****	<0.0001
	mPAO1+p(empty) vs. H09+pPA0769	1.333	-0.3207 to 2.987	No	ns	0.1364
	mPAO1+p(empty) vs. pilA	17.67	16.01 to 19.32	Yes	****	<0.0001
	72hr
	mPAO1+p(empty) vs. PA0769-H09	18.83	17.29 to 20.38	Yes	****	<0.0001
	mPAO1+p(empty) vs. H09+pPA0769	1.333	-0.3173 to 2.984	No	ns	0.1346
	mPAO1+p(empty) vs. pilA	25.33	23.68 to 26.98	Yes	****	<0.0001
