# Supplementary figures and images for: Defining hierarchical protein interaction networks from spectral analysis of bacterial proteomes
Source: eLife journal article supplement (doi:10.7554/elife.74104), 2022-08-17

**A.**

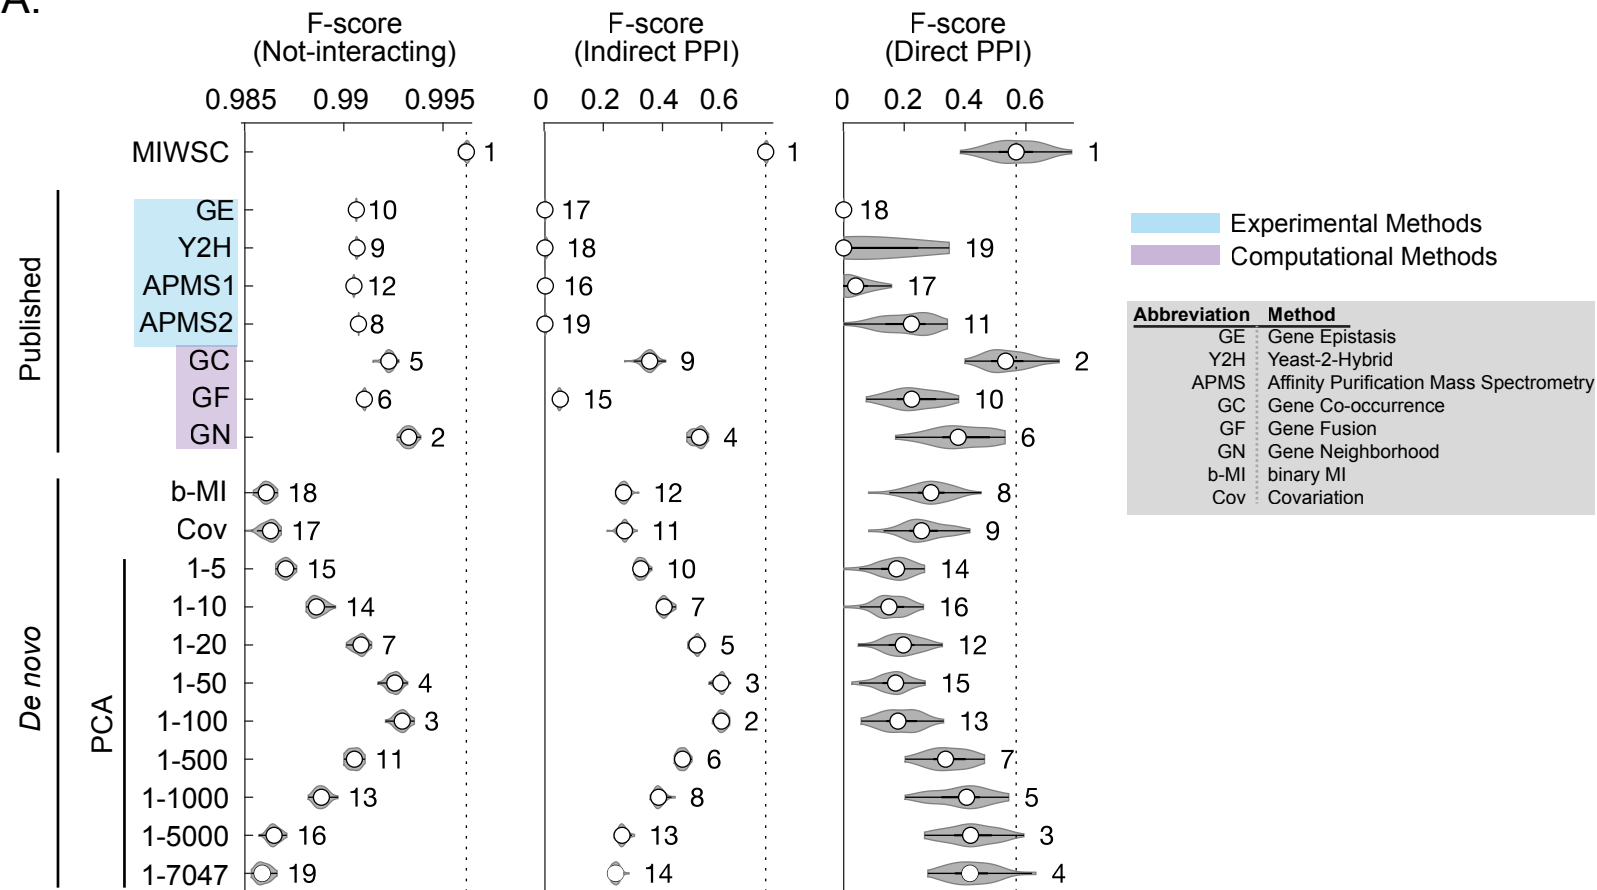

**B.**

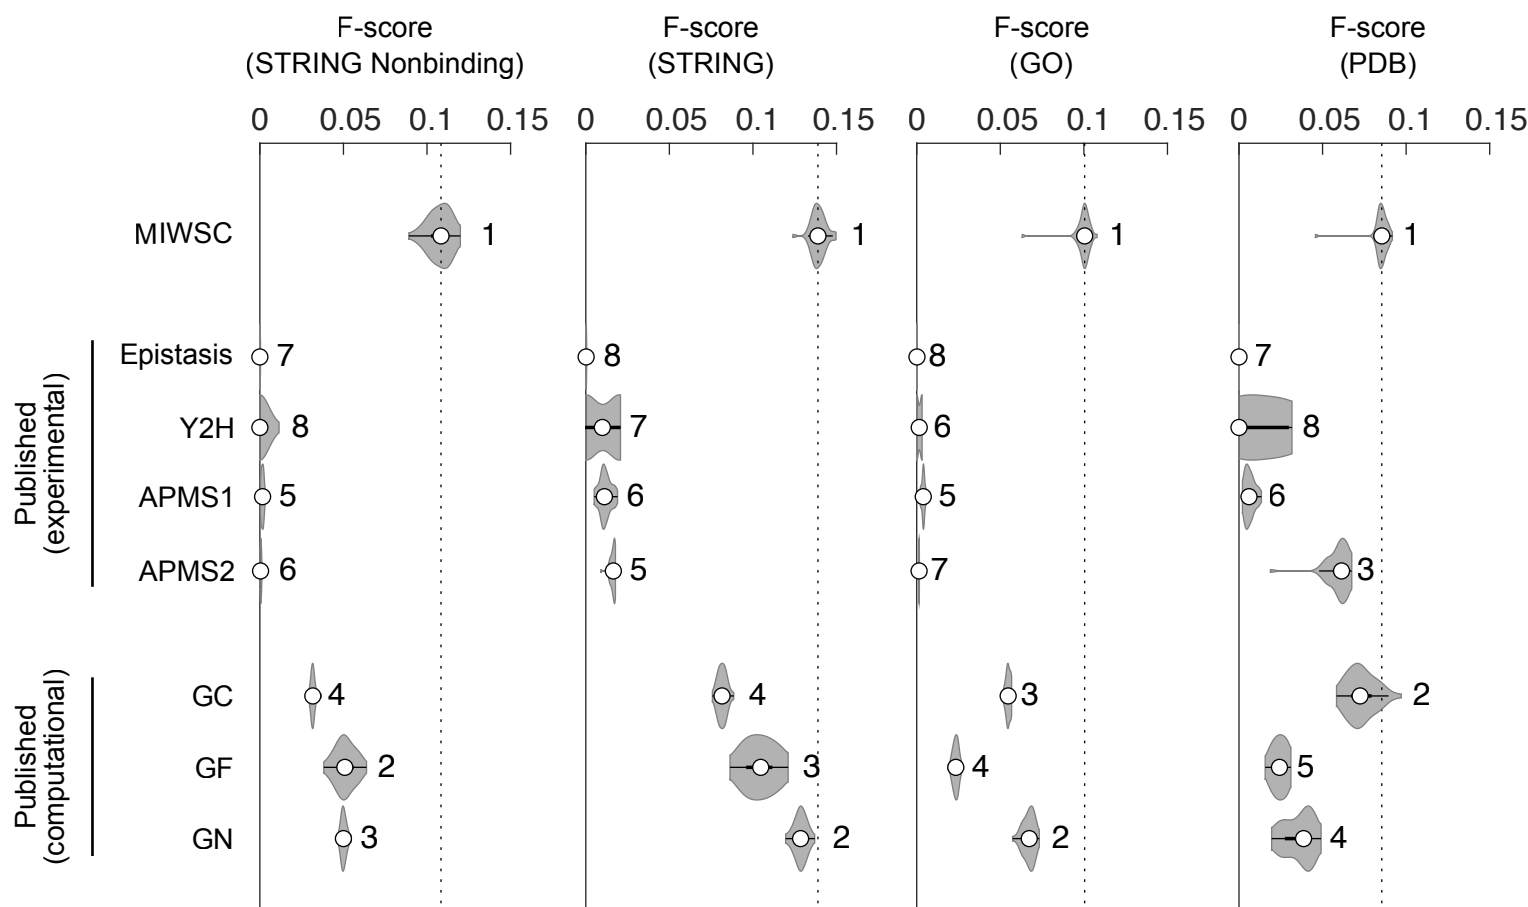

Supplement: supp [file elife_poa_e74104_Figure_8_figure_supplement_3.pdf › elife_poa_e74104_Figure_8_figure_supplement_3.pdf]
